# Supplementary material for: Exploring the reducing role of boron: added insights from theory
Source: Royal Society of Chemistry journal article supplement (doi:10.1039/c5dt03799a), 2015-11-18
Supplement: c5dt03799a1.pdf [file c5dt03799a1.pdf]

\*\*\*\*\*Gaussian NBO Version 3.1\*\*\*\*\*  
N A T U R A L A T O M I C O R B I T A L A N D  
N A T U R A L B O N D O R B I T A L A N A L Y S I S  
\*\*\*\*\*Gaussian NBO Version 3.1\*\*\*\*\*

/RESON / : Allow strongly delocalized NBO set  
/PLOT / : Write information for the orbital plotter

Analyzing the SCF density

Job title: Molden generated mol2

Storage needed: 7831912 in NPA, 10391205 in NBO, 17213248 in NLMO ( 33504081 available)

NATURAL POPULATIONS: Natural atomic orbital occupancies

| NAO | Atom | No | lang  | Type(AO) | Occupancy | Energy    |
|-----|------|----|-------|----------|-----------|-----------|
| 1   | C    | 1  | S     | Cor( 1S) | 1.99866   | -9.74312  |
| 2   | C    | 1  | S     | Val( 2S) | 0.91258   | -0.15652  |
| 3   | C    | 1  | S     | Ryd( 3S) | 0.00955   | 1.36430   |
| 4   | C    | 1  | S     | Ryd( 4S) | 0.00076   | 2.34685   |
| 5   | C    | 1  | S     | Ryd( 5S) | 0.00001   | 20.68659  |
| 6   | C    | 1  | px    | Val( 2p) | 1.09440   | -0.03788  |
| 7   | C    | 1  | px    | Ryd( 3p) | 0.00150   | 1.01460   |
| 8   | C    | 1  | px    | Ryd( 4p) | 0.00050   | 1.59088   |
| 9   | C    | 1  | py    | Val( 2p) | 0.92636   | -0.05262  |
| 10  | C    | 1  | py    | Ryd( 3p) | 0.00146   | 0.90220   |
| 11  | C    | 1  | py    | Ryd( 4p) | 0.00043   | 1.47200   |
| 12  | C    | 1  | pz    | Val( 2p) | 0.90356   | -0.01019  |
| 13  | C    | 1  | pz    | Ryd( 3p) | 0.01427   | 1.24759   |
| 14  | C    | 1  | pz    | Ryd( 4p) | 0.00080   | 1.55569   |
| 15  | C    | 1  | dxy   | Ryd( 3d) | 0.00045   | 2.01034   |
| 16  | C    | 1  | dxz   | Ryd( 3d) | 0.00223   | 2.42213   |
| 17  | C    | 1  | dyz   | Ryd( 3d) | 0.00220   | 2.34682   |
| 18  | C    | 1  | dx2y2 | Ryd( 3d) | 0.00032   | 2.03559   |
| 19  | C    | 1  | dz2   | Ryd( 3d) | 0.00147   | 2.76860   |
| 20  | O    | 2  | S     | Cor( 1S) | 1.99981   | -18.41339 |
| 21  | O    | 2  | S     | Val( 2S) | 1.69933   | -0.76751  |
| 22  | O    | 2  | S     | Ryd( 3S) | 0.00223   | 1.38071   |
| 23  | O    | 2  | S     | Ryd( 4S) | 0.00003   | 6.03000   |
| 24  | O    | 2  | S     | Ryd( 5S) | 0.00000   | 40.67539  |
| 25  | O    | 2  | px    | Val( 2p) | 1.72668   | -0.15911  |
| 26  | O    | 2  | px    | Ryd( 3p) | 0.00513   | 0.79523   |
| 27  | O    | 2  | px    | Ryd( 4p) | 0.00003   | 2.95877   |
| 28  | O    | 2  | py    | Val( 2p) | 1.59521   | -0.16678  |
| 29  | O    | 2  | py    | Ryd( 3p) | 0.00349   | 0.75568   |
| 30  | O    | 2  | py    | Ryd( 4p) | 0.00003   | 2.95301   |
| 31  | O    | 2  | pz    | Val( 2p) | 1.57187   | -0.20484  |
| 32  | O    | 2  | pz    | Ryd( 3p) | 0.00205   | 0.66046   |
| 33  | O    | 2  | pz    | Ryd( 4p) | 0.00015   | 3.08111   |
| 34  | O    | 2  | dxy   | Ryd( 3d) | 0.00016   | 2.69838   |
| 35  | O    | 2  | dxz   | Ryd( 3d) | 0.00127   | 2.97120   |
| 36  | O    | 2  | dyz   | Ryd( 3d) | 0.00142   | 2.96156   |
| 37  | O    | 2  | dx2y2 | Ryd( 3d) | 0.00015   | 2.71611   |
| 38  | O    | 2  | dz2   | Ryd( 3d) | 0.00196   | 3.32929   |
| 39  | C    | 3  | S     | Cor( 1S) | 1.99898   | -9.73452  |
| 40  | C    | 3  | S     | Val( 2S) | 0.92589   | -0.18652  |
| 41  | C    | 3  | S     | Ryd( 3S) | 0.00170   | 0.91213   |
| 42  | C    | 3  | S     | Ryd( 4S) | 0.00042   | 2.03401   |
| 43  | C    | 3  | S     | Ryd( 5S) | 0.00000   | 21.21279  |
| 44  | C    | 3  | px    | Val( 2p) | 1.01149   | -0.05903  |
| 45  | C    | 3  | px    | Ryd( 3p) | 0.00297   | 0.88674   |
| 46  | C    | 3  | px    | Ryd( 4p) | 0.00043   | 1.57562   |
| 47  | C    | 3  | py    | Val( 2p) | 0.99048   | -0.07465  |
| 48  | C    | 3  | py    | Ryd( 3p) | 0.00244   | 0.81411   |
| 49  | C    | 3  | py    | Ryd( 4p) | 0.00031   | 1.45698   |
| 50  | C    | 3  | pz    | Val( 2p) | 1.03143   | -0.03721  |

|     |   |   |       |          |         |          |
|-----|---|---|-------|----------|---------|----------|
| 51  | C | 3 | pz    | Ryd( 3p) | 0.00483 | 1.21918  |
| 52  | C | 3 | pz    | Ryd( 4p) | 0.00047 | 1.64524  |
| 53  | C | 3 | dxz   | Ryd( 3d) | 0.00057 | 2.44868  |
| 54  | C | 3 | dxz   | Ryd( 3d) | 0.00080 | 2.43860  |
| 55  | C | 3 | dyz   | Ryd( 3d) | 0.00077 | 2.27424  |
| 56  | C | 3 | dx2y2 | Ryd( 3d) | 0.00057 | 2.01657  |
| 57  | C | 3 | dz2   | Ryd( 3d) | 0.00066 | 2.45955  |
| 58  | C | 4 | S     | Cor( 1S) | 1.99875 | -9.77297 |
| 59  | C | 4 | S     | Val( 2S) | 0.86758 | -0.17193 |
| 60  | C | 4 | S     | Ryd( 3S) | 0.00124 | 0.95271  |
| 61  | C | 4 | S     | Ryd( 4S) | 0.00064 | 1.89448  |
| 62  | C | 4 | S     | Ryd( 5S) | 0.00000 | 21.52096 |
| 63  | C | 4 | px    | Val( 2p) | 0.99698 | -0.06921 |
| 64  | C | 4 | px    | Ryd( 3p) | 0.00365 | 0.94114  |
| 65  | C | 4 | px    | Ryd( 4p) | 0.00059 | 1.71734  |
| 66  | C | 4 | py    | Val( 2p) | 0.98781 | -0.08412 |
| 67  | C | 4 | py    | Ryd( 3p) | 0.00434 | 0.88173  |
| 68  | C | 4 | py    | Ryd( 4p) | 0.00050 | 1.67950  |
| 69  | C | 4 | pz    | Val( 2p) | 1.00925 | -0.05448 |
| 70  | C | 4 | pz    | Ryd( 3p) | 0.00318 | 0.98410  |
| 71  | C | 4 | pz    | Ryd( 4p) | 0.00057 | 1.74149  |
| 72  | C | 4 | dxz   | Ryd( 3d) | 0.00065 | 2.48300  |
| 73  | C | 4 | dxz   | Ryd( 3d) | 0.00088 | 2.47737  |
| 74  | C | 4 | dyz   | Ryd( 3d) | 0.00078 | 2.28956  |
| 75  | C | 4 | dx2y2 | Ryd( 3d) | 0.00052 | 2.13935  |
| 76  | C | 4 | dz2   | Ryd( 3d) | 0.00096 | 2.48512  |
| 77  | C | 5 | S     | Cor( 1S) | 1.99898 | -9.73846 |
| 78  | C | 5 | S     | Val( 2S) | 0.92415 | -0.19176 |
| 79  | C | 5 | S     | Ryd( 3S) | 0.00175 | 0.95500  |
| 80  | C | 5 | S     | Ryd( 4S) | 0.00041 | 1.96130  |
| 81  | C | 5 | S     | Ryd( 5S) | 0.00000 | 21.12705 |
| 82  | C | 5 | px    | Val( 2p) | 1.01557 | -0.05915 |
| 83  | C | 5 | px    | Ryd( 3p) | 0.00362 | 1.08553  |
| 84  | C | 5 | px    | Ryd( 4p) | 0.00028 | 1.55908  |
| 85  | C | 5 | py    | Val( 2p) | 1.00204 | -0.08074 |
| 86  | C | 5 | py    | Ryd( 3p) | 0.00299 | 0.85095  |
| 87  | C | 5 | py    | Ryd( 4p) | 0.00023 | 1.41213  |
| 88  | C | 5 | pz    | Val( 2p) | 1.03476 | -0.04874 |
| 89  | C | 5 | pz    | Ryd( 3p) | 0.00381 | 1.05069  |
| 90  | C | 5 | pz    | Ryd( 4p) | 0.00045 | 1.56944  |
| 91  | C | 5 | dxz   | Ryd( 3d) | 0.00061 | 2.36795  |
| 92  | C | 5 | dxz   | Ryd( 3d) | 0.00072 | 2.42356  |
| 93  | C | 5 | dyz   | Ryd( 3d) | 0.00069 | 2.23993  |
| 94  | C | 5 | dx2y2 | Ryd( 3d) | 0.00050 | 2.04986  |
| 95  | C | 5 | dz2   | Ryd( 3d) | 0.00079 | 2.49314  |
| 96  | C | 6 | S     | Cor( 1S) | 1.99909 | -9.72700 |
| 97  | C | 6 | S     | Val( 2S) | 0.97286 | -0.20262 |
| 98  | C | 6 | S     | Ryd( 4S) | 0.00097 | 1.40548  |
| 99  | C | 6 | S     | Ryd( 3S) | 0.00010 | 1.36155  |
| 100 | C | 6 | S     | Ryd( 5S) | 0.00000 | 21.24141 |
| 101 | C | 6 | px    | Val( 2p) | 1.04595 | -0.06720 |
| 102 | C | 6 | px    | Ryd( 3p) | 0.00207 | 0.97039  |
| 103 | C | 6 | px    | Ryd( 4p) | 0.00038 | 1.33378  |
| 104 | C | 6 | py    | Val( 2p) | 1.03385 | -0.08476 |
| 105 | C | 6 | py    | Ryd( 3p) | 0.00178 | 0.80232  |
| 106 | C | 6 | py    | Ryd( 4p) | 0.00052 | 1.21978  |
| 107 | C | 6 | pz    | Val( 2p) | 1.15908 | -0.05534 |
| 108 | C | 6 | pz    | Ryd( 4p) | 0.00372 | 1.18812  |
| 109 | C | 6 | pz    | Ryd( 3p) | 0.00051 | 1.15498  |
| 110 | C | 6 | dxz   | Ryd( 3d) | 0.00057 | 2.41960  |
| 111 | C | 6 | dxz   | Ryd( 3d) | 0.00065 | 2.37515  |
| 112 | C | 6 | dyz   | Ryd( 3d) | 0.00047 | 2.23660  |
| 113 | C | 6 | dx2y2 | Ryd( 3d) | 0.00046 | 2.02376  |
| 114 | C | 6 | dz2   | Ryd( 3d) | 0.00061 | 2.40319  |
| 115 | C | 7 | S     | Cor( 1S) | 1.99920 | -9.73026 |
| 116 | C | 7 | S     | Val( 2S) | 0.97727 | -0.20593 |
| 117 | C | 7 | S     | Ryd( 3S) | 0.00079 | 1.07366  |

|     |   |    |       |          |         |           |
|-----|---|----|-------|----------|---------|-----------|
| 118 | C | 7  | S     | Ryd( 4S) | 0.00009 | 1.43879   |
| 119 | C | 7  | S     | Ryd( 5S) | 0.00000 | 21.18819  |
| 120 | C | 7  | px    | Val( 2p) | 1.07125 | -0.06675  |
| 121 | C | 7  | px    | Ryd( 3p) | 0.00294 | 0.91731   |
| 122 | C | 7  | px    | Ryd( 4p) | 0.00029 | 1.35642   |
| 123 | C | 7  | py    | Val( 2p) | 1.05722 | -0.08545  |
| 124 | C | 7  | py    | Ryd( 3p) | 0.00225 | 0.83594   |
| 125 | C | 7  | py    | Ryd( 4p) | 0.00031 | 1.38056   |
| 126 | C | 7  | pz    | Val( 2p) | 1.08023 | -0.04985  |
| 127 | C | 7  | pz    | Ryd( 3p) | 0.00352 | 0.96811   |
| 128 | C | 7  | pz    | Ryd( 4p) | 0.00034 | 1.28696   |
| 129 | C | 7  | dxz   | Ryd( 3d) | 0.00050 | 2.35943   |
| 130 | C | 7  | dxz   | Ryd( 3d) | 0.00065 | 2.38376   |
| 131 | C | 7  | dyz   | Ryd( 3d) | 0.00053 | 2.19720   |
| 132 | C | 7  | dx2y2 | Ryd( 3d) | 0.00034 | 1.98427   |
| 133 | C | 7  | dz2   | Ryd( 3d) | 0.00078 | 2.45320   |
| 134 | C | 8  | S     | Cor( 1S) | 1.99910 | -9.72396  |
| 135 | C | 8  | S     | Val( 2S) | 0.97448 | -0.19933  |
| 136 | C | 8  | S     | Ryd( 4S) | 0.00096 | 1.40520   |
| 137 | C | 8  | S     | Ryd( 3S) | 0.00009 | 1.37585   |
| 138 | C | 8  | S     | Ryd( 5S) | 0.00000 | 21.31134  |
| 139 | C | 8  | px    | Val( 2p) | 1.11738 | -0.06646  |
| 140 | C | 8  | px    | Ryd( 3p) | 0.00292 | 1.05382   |
| 141 | C | 8  | px    | Ryd( 4p) | 0.00043 | 1.22424   |
| 142 | C | 8  | py    | Val( 2p) | 1.04949 | -0.08148  |
| 143 | C | 8  | py    | Ryd( 3p) | 0.00227 | 0.83420   |
| 144 | C | 8  | py    | Ryd( 4p) | 0.00050 | 1.21758   |
| 145 | C | 8  | pz    | Val( 2p) | 1.06886 | -0.04826  |
| 146 | C | 8  | pz    | Ryd( 3p) | 0.00257 | 1.12803   |
| 147 | C | 8  | pz    | Ryd( 4p) | 0.00025 | 1.36733   |
| 148 | C | 8  | dxz   | Ryd( 3d) | 0.00052 | 2.37956   |
| 149 | C | 8  | dxz   | Ryd( 3d) | 0.00068 | 2.36251   |
| 150 | C | 8  | dyz   | Ryd( 3d) | 0.00054 | 2.25321   |
| 151 | C | 8  | dx2y2 | Ryd( 3d) | 0.00038 | 1.98804   |
| 152 | C | 8  | dz2   | Ryd( 3d) | 0.00063 | 2.50045   |
| 153 | N | 9  | S     | Cor( 1S) | 1.99944 | -13.85291 |
| 154 | N | 9  | S     | Val( 2S) | 1.19090 | -0.50288  |
| 155 | N | 9  | S     | Ryd( 3S) | 0.00124 | 1.33090   |
| 156 | N | 9  | S     | Ryd( 4S) | 0.00009 | 3.63900   |
| 157 | N | 9  | S     | Ryd( 5S) | 0.00000 | 30.09029  |
| 158 | N | 9  | px    | Val( 2p) | 1.34040 | -0.22618  |
| 159 | N | 9  | px    | Ryd( 3p) | 0.00456 | 1.06628   |
| 160 | N | 9  | px    | Ryd( 4p) | 0.00017 | 2.51149   |
| 161 | N | 9  | py    | Val( 2p) | 1.29241 | -0.23003  |
| 162 | N | 9  | py    | Ryd( 3p) | 0.00380 | 1.02328   |
| 163 | N | 9  | py    | Ryd( 4p) | 0.00022 | 2.56696   |
| 164 | N | 9  | pz    | Val( 2p) | 1.49693 | -0.22348  |
| 165 | N | 9  | pz    | Ryd( 3p) | 0.00518 | 0.81343   |
| 166 | N | 9  | pz    | Ryd( 4p) | 0.00027 | 2.45311   |
| 167 | N | 9  | dxz   | Ryd( 3d) | 0.00081 | 2.68806   |
| 168 | N | 9  | dxz   | Ryd( 3d) | 0.00078 | 2.66768   |
| 169 | N | 9  | dyz   | Ryd( 3d) | 0.00075 | 2.50630   |
| 170 | N | 9  | dx2y2 | Ryd( 3d) | 0.00119 | 2.80409   |
| 171 | N | 9  | dz2   | Ryd( 3d) | 0.00057 | 2.59928   |
| 172 | C | 10 | S     | Cor( 1S) | 1.99868 | -9.79306  |
| 173 | C | 10 | S     | Val( 2S) | 0.95163 | -0.19674  |
| 174 | C | 10 | S     | Ryd( 3S) | 0.00282 | 1.54460   |
| 175 | C | 10 | S     | Ryd( 4S) | 0.00073 | 2.80549   |
| 176 | C | 10 | S     | Ryd( 5S) | 0.00001 | 20.18526  |
| 177 | C | 10 | px    | Val( 2p) | 1.02803 | -0.07571  |
| 178 | C | 10 | px    | Ryd( 4p) | 0.00432 | 1.58590   |
| 179 | C | 10 | px    | Ryd( 3p) | 0.00112 | 1.48309   |
| 180 | C | 10 | py    | Val( 2p) | 0.88955 | -0.04976  |
| 181 | C | 10 | py    | Ryd( 3p) | 0.00386 | 1.41902   |
| 182 | C | 10 | py    | Ryd( 4p) | 0.00131 | 1.47925   |
| 183 | C | 10 | pz    | Val( 2p) | 0.98089 | -0.09841  |
| 184 | C | 10 | pz    | Ryd( 3p) | 0.00241 | 1.06237   |
| 185 | C | 10 | pz    | Ryd( 4p) | 0.00097 | 1.23892   |

|     |   |    |       |          |         |           |
|-----|---|----|-------|----------|---------|-----------|
| 186 | C | 10 | dxy   | Ryd( 3d) | 0.00063 | 2.50486   |
| 187 | C | 10 | dxz   | Ryd( 3d) | 0.00094 | 2.34896   |
| 188 | C | 10 | dyz   | Ryd( 3d) | 0.00080 | 2.05758   |
| 189 | C | 10 | dx2y2 | Ryd( 3d) | 0.00092 | 2.65358   |
| 190 | C | 10 | dz2   | Ryd( 3d) | 0.00066 | 2.25771   |
| 191 | N | 11 | S     | Cor( 1S) | 1.99943 | -13.85452 |
| 192 | N | 11 | S     | Val( 2S) | 1.19030 | -0.50308  |
| 193 | N | 11 | S     | Ryd( 3S) | 0.00128 | 0.91407   |
| 194 | N | 11 | S     | Ryd( 4S) | 0.00017 | 3.70645   |
| 195 | N | 11 | S     | Ryd( 5S) | 0.00000 | 30.34846  |
| 196 | N | 11 | px    | Val( 2p) | 1.33065 | -0.22940  |
| 197 | N | 11 | px    | Ryd( 3p) | 0.00394 | 0.86395   |
| 198 | N | 11 | px    | Ryd( 4p) | 0.00015 | 2.48451   |
| 199 | N | 11 | py    | Val( 2p) | 1.27252 | -0.22607  |
| 200 | N | 11 | py    | Ryd( 3p) | 0.00405 | 1.24960   |
| 201 | N | 11 | py    | Ryd( 4p) | 0.00024 | 2.65908   |
| 202 | N | 11 | pz    | Val( 2p) | 1.52689 | -0.22548  |
| 203 | N | 11 | pz    | Ryd( 3p) | 0.00567 | 0.79387   |
| 204 | N | 11 | pz    | Ryd( 4p) | 0.00029 | 2.42763   |
| 205 | N | 11 | dxy   | Ryd( 3d) | 0.00110 | 2.85011   |
| 206 | N | 11 | dxz   | Ryd( 3d) | 0.00075 | 2.58149   |
| 207 | N | 11 | dyz   | Ryd( 3d) | 0.00063 | 2.50053   |
| 208 | N | 11 | dx2y2 | Ryd( 3d) | 0.00102 | 2.72328   |
| 209 | N | 11 | dz2   | Ryd( 3d) | 0.00065 | 2.58654   |
| 210 | C | 12 | S     | Cor( 1S) | 1.99902 | -9.77380  |
| 211 | C | 12 | S     | Val( 2S) | 0.95156 | -0.21206  |
| 212 | C | 12 | S     | Ryd( 3S) | 0.00127 | 1.08253   |
| 213 | C | 12 | S     | Ryd( 4S) | 0.00014 | 1.61045   |
| 214 | C | 12 | S     | Ryd( 5S) | 0.00001 | 21.53830  |
| 215 | C | 12 | px    | Val( 2p) | 1.11012 | -0.07357  |
| 216 | C | 12 | px    | Ryd( 3p) | 0.00280 | 0.95340   |
| 217 | C | 12 | px    | Ryd( 4p) | 0.00073 | 1.48401   |
| 218 | C | 12 | py    | Val( 2p) | 0.91067 | -0.07292  |
| 219 | C | 12 | py    | Ryd( 3p) | 0.00324 | 0.79780   |
| 220 | C | 12 | py    | Ryd( 4p) | 0.00074 | 1.43178   |
| 221 | C | 12 | pz    | Val( 2p) | 1.11138 | -0.11675  |
| 222 | C | 12 | pz    | Ryd( 3p) | 0.00357 | 0.69544   |
| 223 | C | 12 | pz    | Ryd( 4p) | 0.00062 | 1.48102   |
| 224 | C | 12 | dxy   | Ryd( 3d) | 0.00078 | 2.68601   |
| 225 | C | 12 | dxz   | Ryd( 3d) | 0.00067 | 2.27755   |
| 226 | C | 12 | dyz   | Ryd( 3d) | 0.00097 | 2.13923   |
| 227 | C | 12 | dx2y2 | Ryd( 3d) | 0.00066 | 2.42726   |
| 228 | C | 12 | dz2   | Ryd( 3d) | 0.00052 | 2.21107   |
| 229 | C | 13 | S     | Cor( 1S) | 1.99902 | -9.77360  |
| 230 | C | 13 | S     | Val( 2S) | 0.95045 | -0.21104  |
| 231 | C | 13 | S     | Ryd( 3S) | 0.00126 | 1.07320   |
| 232 | C | 13 | S     | Ryd( 4S) | 0.00016 | 1.61680   |
| 233 | C | 13 | S     | Ryd( 5S) | 0.00001 | 21.53710  |
| 234 | C | 13 | px    | Val( 2p) | 0.90599 | -0.07543  |
| 235 | C | 13 | px    | Ryd( 3p) | 0.00325 | 0.69990   |
| 236 | C | 13 | px    | Ryd( 4p) | 0.00068 | 1.39481   |
| 237 | C | 13 | py    | Val( 2p) | 1.17333 | -0.06988  |
| 238 | C | 13 | py    | Ryd( 3p) | 0.00270 | 1.13719   |
| 239 | C | 13 | py    | Ryd( 4p) | 0.00079 | 1.58519   |
| 240 | C | 13 | pz    | Val( 2p) | 1.05485 | -0.11765  |
| 241 | C | 13 | pz    | Ryd( 3p) | 0.00376 | 0.60073   |
| 242 | C | 13 | pz    | Ryd( 4p) | 0.00059 | 1.37186   |
| 243 | C | 13 | dxy   | Ryd( 3d) | 0.00064 | 2.53516   |
| 244 | C | 13 | dxz   | Ryd( 3d) | 0.00066 | 2.24298   |
| 245 | C | 13 | dyz   | Ryd( 3d) | 0.00060 | 2.15571   |
| 246 | C | 13 | dx2y2 | Ryd( 3d) | 0.00082 | 2.54005   |
| 247 | C | 13 | dz2   | Ryd( 3d) | 0.00077 | 2.18771   |
| 248 | B | 14 | S     | Cor( 1S) | 1.99770 | -6.32115  |
| 249 | B | 14 | S     | Val( 2S) | 0.66358 | 0.05761   |
| 250 | B | 14 | S     | Ryd( 3S) | 0.00103 | 1.15216   |
| 251 | B | 14 | S     | Ryd( 5S) | 0.00046 | 8.65844   |
| 252 | B | 14 | S     | Ryd( 4S) | 0.00008 | 4.41273   |

|     |   |    |       |          |         |           |
|-----|---|----|-------|----------|---------|-----------|
| 253 | B | 14 | px    | Val( 2p) | 0.70960 | 0.13565   |
| 254 | B | 14 | px    | Ryd( 3p) | 0.00234 | 1.42385   |
| 255 | B | 14 | px    | Ryd( 4p) | 0.00119 | 1.56779   |
| 256 | B | 14 | py    | Val( 2p) | 0.66899 | 0.06300   |
| 257 | B | 14 | py    | Ryd( 3p) | 0.00127 | 0.93492   |
| 258 | B | 14 | py    | Ryd( 4p) | 0.00096 | 1.39166   |
| 259 | B | 14 | pz    | Val( 2p) | 0.88573 | 0.06457   |
| 260 | B | 14 | pz    | Ryd( 3p) | 0.00102 | 0.85270   |
| 261 | B | 14 | pz    | Ryd( 4p) | 0.00075 | 1.17255   |
| 262 | B | 14 | dxy   | Ryd( 3d) | 0.00071 | 2.07507   |
| 263 | B | 14 | dxz   | Ryd( 3d) | 0.00052 | 1.94055   |
| 264 | B | 14 | dyz   | Ryd( 3d) | 0.00056 | 1.47745   |
| 265 | B | 14 | dx2y2 | Ryd( 3d) | 0.00051 | 1.96939   |
| 266 | B | 14 | dz2   | Ryd( 3d) | 0.00064 | 1.72449   |
| 267 | B | 15 | S     | Cor( 1S) | 1.99698 | -6.31152  |
| 268 | B | 15 | S     | Val( 2S) | 0.61819 | 0.10571   |
| 269 | B | 15 | S     | Ryd( 3S) | 0.00190 | 1.46089   |
| 270 | B | 15 | S     | Ryd( 5S) | 0.00047 | 7.59804   |
| 271 | B | 15 | S     | Ryd( 4S) | 0.00009 | 4.48440   |
| 272 | B | 15 | px    | Val( 2p) | 0.92413 | 0.09840   |
| 273 | B | 15 | px    | Ryd( 3p) | 0.00206 | 1.31720   |
| 274 | B | 15 | px    | Ryd( 4p) | 0.00130 | 1.48355   |
| 275 | B | 15 | py    | Val( 2p) | 0.76253 | 0.05368   |
| 276 | B | 15 | py    | Ryd( 3p) | 0.00155 | 0.86909   |
| 277 | B | 15 | py    | Ryd( 4p) | 0.00107 | 1.26480   |
| 278 | B | 15 | pz    | Val( 2p) | 0.84537 | 0.08837   |
| 279 | B | 15 | pz    | Ryd( 3p) | 0.00137 | 0.84774   |
| 280 | B | 15 | pz    | Ryd( 4p) | 0.00159 | 1.22861   |
| 281 | B | 15 | dxy   | Ryd( 3d) | 0.00032 | 1.95680   |
| 282 | B | 15 | dxz   | Ryd( 3d) | 0.00099 | 1.88291   |
| 283 | B | 15 | dyz   | Ryd( 3d) | 0.00057 | 1.76842   |
| 284 | B | 15 | dx2y2 | Ryd( 3d) | 0.00038 | 1.83587   |
| 285 | B | 15 | dz2   | Ryd( 3d) | 0.00056 | 1.94121   |
| 286 | C | 16 | S     | Cor( 1S) | 1.99875 | -9.80721  |
| 287 | C | 16 | S     | Val( 2S) | 0.94763 | -0.20470  |
| 288 | C | 16 | S     | Ryd( 3S) | 0.00328 | 1.57805   |
| 289 | C | 16 | S     | Ryd( 4S) | 0.00072 | 2.41066   |
| 290 | C | 16 | S     | Ryd( 5S) | 0.00001 | 20.13267  |
| 291 | C | 16 | px    | Val( 2p) | 0.96761 | -0.06493  |
| 292 | C | 16 | px    | Ryd( 4p) | 0.00472 | 1.55252   |
| 293 | C | 16 | px    | Ryd( 3p) | 0.00138 | 1.43777   |
| 294 | C | 16 | py    | Val( 2p) | 0.96919 | -0.09678  |
| 295 | C | 16 | py    | Ryd( 4p) | 0.00378 | 1.30532   |
| 296 | C | 16 | py    | Ryd( 3p) | 0.00098 | 1.28170   |
| 297 | C | 16 | pz    | Val( 2p) | 0.87817 | -0.08117  |
| 298 | C | 16 | pz    | Ryd( 3p) | 0.00275 | 1.33929   |
| 299 | C | 16 | pz    | Ryd( 4p) | 0.00100 | 1.34000   |
| 300 | C | 16 | dxy   | Ryd( 3d) | 0.00067 | 2.22767   |
| 301 | C | 16 | dxz   | Ryd( 3d) | 0.00073 | 2.34673   |
| 302 | C | 16 | dyz   | Ryd( 3d) | 0.00062 | 2.55394   |
| 303 | C | 16 | dx2y2 | Ryd( 3d) | 0.00097 | 2.49251   |
| 304 | C | 16 | dz2   | Ryd( 3d) | 0.00098 | 2.13978   |
| 305 | N | 17 | S     | Cor( 1S) | 1.99942 | -13.87230 |
| 306 | N | 17 | S     | Val( 2S) | 1.19577 | -0.52154  |
| 307 | N | 17 | S     | Ryd( 3S) | 0.00148 | 0.92646   |
| 308 | N | 17 | S     | Ryd( 4S) | 0.00016 | 3.65502   |
| 309 | N | 17 | S     | Ryd( 5S) | 0.00000 | 30.34483  |
| 310 | N | 17 | px    | Val( 2p) | 1.29928 | -0.24889  |
| 311 | N | 17 | px    | Ryd( 3p) | 0.00339 | 0.91215   |
| 312 | N | 17 | px    | Ryd( 4p) | 0.00018 | 2.53624   |
| 313 | N | 17 | py    | Val( 2p) | 1.39483 | -0.24394  |
| 314 | N | 17 | py    | Ryd( 3p) | 0.00403 | 0.90304   |
| 315 | N | 17 | py    | Ryd( 4p) | 0.00021 | 2.50798   |
| 316 | N | 17 | pz    | Val( 2p) | 1.40171 | -0.24450  |
| 317 | N | 17 | pz    | Ryd( 3p) | 0.00504 | 1.07403   |
| 318 | N | 17 | pz    | Ryd( 4p) | 0.00023 | 2.49052   |
| 319 | N | 17 | dxy   | Ryd( 3d) | 0.00082 | 2.59847   |
| 320 | N | 17 | dxz   | Ryd( 3d) | 0.00101 | 2.66011   |

|     |   |    |       |          |         |           |
|-----|---|----|-------|----------|---------|-----------|
| 321 | N | 17 | dyz   | Ryd( 3d) | 0.00081 | 2.80839   |
| 322 | N | 17 | dx2y2 | Ryd( 3d) | 0.00098 | 2.63634   |
| 323 | N | 17 | dz2   | Ryd( 3d) | 0.00065 | 2.48261   |
| 324 | C | 18 | S     | Cor( 1S) | 1.99904 | -9.79245  |
| 325 | C | 18 | S     | Val( 2S) | 0.95409 | -0.23008  |
| 326 | C | 18 | S     | Ryd( 3S) | 0.00122 | 1.09116   |
| 327 | C | 18 | S     | Ryd( 4S) | 0.00011 | 1.60526   |
| 328 | C | 18 | S     | Ryd( 5S) | 0.00001 | 21.50224  |
| 329 | C | 18 | px    | Val( 2p) | 1.14897 | -0.08476  |
| 330 | C | 18 | px    | Ryd( 3p) | 0.00277 | 1.09505   |
| 331 | C | 18 | px    | Ryd( 4p) | 0.00077 | 1.46354   |
| 332 | C | 18 | py    | Val( 2p) | 0.96898 | -0.11633  |
| 333 | C | 18 | py    | Ryd( 3p) | 0.00326 | 0.66051   |
| 334 | C | 18 | py    | Ryd( 4p) | 0.00064 | 1.32261   |
| 335 | C | 18 | pz    | Val( 2p) | 0.99460 | -0.11442  |
| 336 | C | 18 | pz    | Ryd( 3p) | 0.00327 | 0.73971   |
| 337 | C | 18 | pz    | Ryd( 4p) | 0.00060 | 1.42469   |
| 338 | C | 18 | dxz   | Ryd( 3d) | 0.00066 | 2.38572   |
| 339 | C | 18 | dxz   | Ryd( 3d) | 0.00072 | 2.43996   |
| 340 | C | 18 | dyz   | Ryd( 3d) | 0.00051 | 2.42981   |
| 341 | C | 18 | dx2y2 | Ryd( 3d) | 0.00077 | 2.32009   |
| 342 | C | 18 | dz2   | Ryd( 3d) | 0.00087 | 2.06880   |
| 343 | C | 19 | S     | Cor( 1S) | 1.99904 | -9.79308  |
| 344 | C | 19 | S     | Val( 2S) | 0.95531 | -0.23143  |
| 345 | C | 19 | S     | Ryd( 3S) | 0.00119 | 1.11105   |
| 346 | C | 19 | S     | Ryd( 4S) | 0.00012 | 1.50559   |
| 347 | C | 19 | S     | Ryd( 5S) | 0.00001 | 21.48954  |
| 348 | C | 19 | px    | Val( 2p) | 0.87998 | -0.08878  |
| 349 | C | 19 | px    | Ryd( 3p) | 0.00328 | 0.76182   |
| 350 | C | 19 | px    | Ryd( 4p) | 0.00069 | 1.32020   |
| 351 | C | 19 | py    | Val( 2p) | 1.10713 | -0.11529  |
| 352 | C | 19 | py    | Ryd( 3p) | 0.00311 | 0.79488   |
| 353 | C | 19 | py    | Ryd( 4p) | 0.00079 | 1.34538   |
| 354 | C | 19 | pz    | Val( 2p) | 1.13364 | -0.11509  |
| 355 | C | 19 | pz    | Ryd( 3p) | 0.00296 | 0.88114   |
| 356 | C | 19 | pz    | Ryd( 4p) | 0.00048 | 1.39859   |
| 357 | C | 19 | dxz   | Ryd( 3d) | 0.00079 | 2.38227   |
| 358 | C | 19 | dxz   | Ryd( 3d) | 0.00073 | 2.33511   |
| 359 | C | 19 | dyz   | Ryd( 3d) | 0.00064 | 2.46204   |
| 360 | C | 19 | dx2y2 | Ryd( 3d) | 0.00068 | 2.30207   |
| 361 | C | 19 | dz2   | Ryd( 3d) | 0.00063 | 2.15099   |
| 362 | N | 20 | S     | Cor( 1S) | 1.99942 | -13.87362 |
| 363 | N | 20 | S     | Val( 2S) | 1.19344 | -0.52341  |
| 364 | N | 20 | S     | Ryd( 3S) | 0.00137 | 0.93045   |
| 365 | N | 20 | S     | Ryd( 4S) | 0.00019 | 3.64246   |
| 366 | N | 20 | S     | Ryd( 5S) | 0.00000 | 30.34529  |
| 367 | N | 20 | px    | Val( 2p) | 1.29133 | -0.24620  |
| 368 | N | 20 | px    | Ryd( 3p) | 0.00418 | 1.17239   |
| 369 | N | 20 | px    | Ryd( 4p) | 0.00019 | 2.60157   |
| 370 | N | 20 | py    | Val( 2p) | 1.42362 | -0.24903  |
| 371 | N | 20 | py    | Ryd( 3p) | 0.00425 | 0.79774   |
| 372 | N | 20 | py    | Ryd( 4p) | 0.00023 | 2.44904   |
| 373 | N | 20 | pz    | Val( 2p) | 1.38809 | -0.24958  |
| 374 | N | 20 | pz    | Ryd( 3p) | 0.00443 | 0.91796   |
| 375 | N | 20 | pz    | Ryd( 4p) | 0.00023 | 2.47273   |
| 376 | N | 20 | dxz   | Ryd( 3d) | 0.00081 | 2.60590   |
| 377 | N | 20 | dxz   | Ryd( 3d) | 0.00090 | 2.67443   |
| 378 | N | 20 | dyz   | Ryd( 3d) | 0.00080 | 2.79023   |
| 379 | N | 20 | dx2y2 | Ryd( 3d) | 0.00097 | 2.62359   |
| 380 | N | 20 | dz2   | Ryd( 3d) | 0.00078 | 2.47804   |
| 381 | C | 21 | S     | Cor( 1S) | 1.99873 | -9.77771  |
| 382 | C | 21 | S     | Val( 2S) | 0.86755 | -0.17742  |
| 383 | C | 21 | S     | Ryd( 3S) | 0.00123 | 1.05486   |
| 384 | C | 21 | S     | Ryd( 4S) | 0.00070 | 1.97609   |
| 385 | C | 21 | S     | Ryd( 5S) | 0.00000 | 21.10750  |
| 386 | C | 21 | px    | Val( 2p) | 1.03099 | -0.09792  |
| 387 | C | 21 | px    | Ryd( 3p) | 0.00428 | 0.77589   |

|     |   |    |       |          |         |          |
|-----|---|----|-------|----------|---------|----------|
| 388 | C | 21 | px    | Ryd( 4p) | 0.00056 | 1.65505  |
| 389 | C | 21 | py    | Val( 2p) | 0.99577 | -0.06910 |
| 390 | C | 21 | py    | Ryd( 3p) | 0.00357 | 0.88429  |
| 391 | C | 21 | py    | Ryd( 4p) | 0.00066 | 1.67757  |
| 392 | C | 21 | pz    | Val( 2p) | 0.97205 | -0.05564 |
| 393 | C | 21 | pz    | Ryd( 3p) | 0.00427 | 0.97499  |
| 394 | C | 21 | pz    | Ryd( 4p) | 0.00080 | 1.75403  |
| 395 | C | 21 | dxxy  | Ryd( 3d) | 0.00064 | 2.42319  |
| 396 | C | 21 | dxz   | Ryd( 3d) | 0.00073 | 2.20192  |
| 397 | C | 21 | dyz   | Ryd( 3d) | 0.00097 | 2.56261  |
| 398 | C | 21 | dx2y2 | Ryd( 3d) | 0.00056 | 2.14439  |
| 399 | C | 21 | dz2   | Ryd( 3d) | 0.00088 | 2.57975  |
| 400 | C | 22 | S     | Cor( 1S) | 1.99897 | -9.73706 |
| 401 | C | 22 | S     | Val( 2S) | 0.92100 | -0.18700 |
| 402 | C | 22 | S     | Ryd( 3S) | 0.00226 | 0.88465  |
| 403 | C | 22 | S     | Ryd( 4S) | 0.00041 | 2.01434  |
| 404 | C | 22 | S     | Ryd( 5S) | 0.00000 | 21.04343 |
| 405 | C | 22 | px    | Val( 2p) | 0.97799 | -0.08051 |
| 406 | C | 22 | px    | Ryd( 3p) | 0.00365 | 0.75667  |
| 407 | C | 22 | px    | Ryd( 4p) | 0.00034 | 1.51710  |
| 408 | C | 22 | py    | Val( 2p) | 1.01455 | -0.05227 |
| 409 | C | 22 | py    | Ryd( 3p) | 0.00484 | 1.02652  |
| 410 | C | 22 | py    | Ryd( 4p) | 0.00041 | 1.64687  |
| 411 | C | 22 | pz    | Val( 2p) | 1.03466 | -0.04147 |
| 412 | C | 22 | pz    | Ryd( 3p) | 0.00365 | 0.92297  |
| 413 | C | 22 | pz    | Ryd( 4p) | 0.00062 | 1.65553  |
| 414 | C | 22 | dxxy  | Ryd( 3d) | 0.00054 | 2.35681  |
| 415 | C | 22 | dxz   | Ryd( 3d) | 0.00068 | 2.15133  |
| 416 | C | 22 | dyz   | Ryd( 3d) | 0.00072 | 2.46950  |
| 417 | C | 22 | dx2y2 | Ryd( 3d) | 0.00060 | 2.11023  |
| 418 | C | 22 | dz2   | Ryd( 3d) | 0.00081 | 2.55471  |
| 419 | C | 23 | S     | Cor( 1S) | 1.99909 | -9.72332 |
| 420 | C | 23 | S     | Val( 2S) | 0.97332 | -0.19771 |
| 421 | C | 23 | S     | Ryd( 4S) | 0.00104 | 1.40069  |
| 422 | C | 23 | S     | Ryd( 3S) | 0.00011 | 1.33878  |
| 423 | C | 23 | S     | Ryd( 5S) | 0.00000 | 21.29412 |
| 424 | C | 23 | px    | Val( 2p) | 1.01172 | -0.08428 |
| 425 | C | 23 | px    | Ryd( 3p) | 0.00158 | 0.80871  |
| 426 | C | 23 | px    | Ryd( 4p) | 0.00052 | 1.21252  |
| 427 | C | 23 | py    | Val( 2p) | 1.04526 | -0.05963 |
| 428 | C | 23 | py    | Ryd( 3p) | 0.00224 | 1.01377  |
| 429 | C | 23 | py    | Ryd( 4p) | 0.00040 | 1.29389  |
| 430 | C | 23 | pz    | Val( 2p) | 1.16588 | -0.04797 |
| 431 | C | 23 | pz    | Ryd( 4p) | 0.00384 | 1.19624  |
| 432 | C | 23 | pz    | Ryd( 3p) | 0.00056 | 1.12107  |
| 433 | C | 23 | dxxy  | Ryd( 3d) | 0.00054 | 2.37920  |
| 434 | C | 23 | dxz   | Ryd( 3d) | 0.00045 | 2.13006  |
| 435 | C | 23 | dyz   | Ryd( 3d) | 0.00071 | 2.40011  |
| 436 | C | 23 | dx2y2 | Ryd( 3d) | 0.00043 | 2.04986  |
| 437 | C | 23 | dz2   | Ryd( 3d) | 0.00065 | 2.52376  |
| 438 | C | 24 | S     | Cor( 1S) | 1.99920 | -9.72885 |
| 439 | C | 24 | S     | Val( 2S) | 0.97700 | -0.20429 |
| 440 | C | 24 | S     | Ryd( 3S) | 0.00081 | 1.06154  |
| 441 | C | 24 | S     | Ryd( 4S) | 0.00008 | 1.40826  |
| 442 | C | 24 | S     | Ryd( 5S) | 0.00000 | 21.18474 |
| 443 | C | 24 | px    | Val( 2p) | 1.03209 | -0.08899 |
| 444 | C | 24 | px    | Ryd( 3p) | 0.00190 | 0.78444  |
| 445 | C | 24 | px    | Ryd( 4p) | 0.00032 | 1.28123  |
| 446 | C | 24 | py    | Val( 2p) | 1.07097 | -0.06127 |
| 447 | C | 24 | py    | Ryd( 3p) | 0.00306 | 0.93377  |
| 448 | C | 24 | py    | Ryd( 4p) | 0.00033 | 1.31110  |
| 449 | C | 24 | pz    | Val( 2p) | 1.10083 | -0.04643 |
| 450 | C | 24 | pz    | Ryd( 3p) | 0.00359 | 1.03122  |
| 451 | C | 24 | pz    | Ryd( 4p) | 0.00036 | 1.40022  |
| 452 | C | 24 | dxxy  | Ryd( 3d) | 0.00052 | 2.33358  |
| 453 | C | 24 | dxz   | Ryd( 3d) | 0.00045 | 2.11146  |
| 454 | C | 24 | dyz   | Ryd( 3d) | 0.00065 | 2.40941  |
| 455 | C | 24 | dx2y2 | Ryd( 3d) | 0.00037 | 2.01261  |

|     |   |    |       |          |         |          |
|-----|---|----|-------|----------|---------|----------|
| 456 | C | 24 | dz2   | Ryd( 3d) | 0.00082 | 2.52735  |
| 457 | C | 25 | S     | Cor( 1S) | 1.99909 | -9.72677 |
| 458 | C | 25 | S     | Val( 2S) | 0.97228 | -0.20182 |
| 459 | C | 25 | S     | Ryd( 4S) | 0.00095 | 1.40740  |
| 460 | C | 25 | S     | Ryd( 3S) | 0.00009 | 1.37567  |
| 461 | C | 25 | S     | Ryd( 5S) | 0.00000 | 21.26183 |
| 462 | C | 25 | px    | Val( 2p) | 1.05229 | -0.09064 |
| 463 | C | 25 | px    | Ryd( 3p) | 0.00194 | 0.81739  |
| 464 | C | 25 | px    | Ryd( 4p) | 0.00056 | 1.15943  |
| 465 | C | 25 | py    | Val( 2p) | 1.12391 | -0.06603 |
| 466 | C | 25 | py    | Ryd( 3p) | 0.00308 | 1.06448  |
| 467 | C | 25 | py    | Ryd( 4p) | 0.00050 | 1.16004  |
| 468 | C | 25 | pz    | Val( 2p) | 1.06008 | -0.04882 |
| 469 | C | 25 | pz    | Ryd( 3p) | 0.00248 | 1.10684  |
| 470 | C | 25 | pz    | Ryd( 4p) | 0.00023 | 1.40356  |
| 471 | C | 25 | dxy   | Ryd( 3d) | 0.00048 | 2.32776  |
| 472 | C | 25 | dxz   | Ryd( 3d) | 0.00052 | 2.15430  |
| 473 | C | 25 | dyz   | Ryd( 3d) | 0.00072 | 2.41203  |
| 474 | C | 25 | dx2y2 | Ryd( 3d) | 0.00036 | 1.99865  |
| 475 | C | 25 | dz2   | Ryd( 3d) | 0.00068 | 2.57914  |
| 476 | C | 26 | S     | Cor( 1S) | 1.99898 | -9.73994 |
| 477 | C | 26 | S     | Val( 2S) | 0.92193 | -0.19298 |
| 478 | C | 26 | S     | Ryd( 3S) | 0.00168 | 0.96538  |
| 479 | C | 26 | S     | Ryd( 4S) | 0.00044 | 1.97754  |
| 480 | C | 26 | S     | Ryd( 5S) | 0.00000 | 21.18931 |
| 481 | C | 26 | px    | Val( 2p) | 1.00072 | -0.08746 |
| 482 | C | 26 | px    | Ryd( 3p) | 0.00291 | 0.77586  |
| 483 | C | 26 | px    | Ryd( 4p) | 0.00027 | 1.45872  |
| 484 | C | 26 | py    | Val( 2p) | 1.02484 | -0.06358 |
| 485 | C | 26 | py    | Ryd( 3p) | 0.00333 | 0.95374  |
| 486 | C | 26 | py    | Ryd( 4p) | 0.00047 | 1.55877  |
| 487 | C | 26 | pz    | Val( 2p) | 1.03289 | -0.04442 |
| 488 | C | 26 | pz    | Ryd( 3p) | 0.00427 | 1.24672  |
| 489 | C | 26 | pz    | Ryd( 4p) | 0.00034 | 1.63913  |
| 490 | C | 26 | dxy   | Ryd( 3d) | 0.00061 | 2.40730  |
| 491 | C | 26 | dxz   | Ryd( 3d) | 0.00070 | 2.18238  |
| 492 | C | 26 | dyz   | Ryd( 3d) | 0.00075 | 2.47050  |
| 493 | C | 26 | dx2y2 | Ryd( 3d) | 0.00059 | 2.05581  |
| 494 | C | 26 | dz2   | Ryd( 3d) | 0.00067 | 2.46060  |
| 495 | C | 27 | S     | Cor( 1S) | 1.99936 | -9.74225 |
| 496 | C | 27 | S     | Val( 2S) | 0.99682 | -0.24649 |
| 497 | C | 27 | S     | Ryd( 3S) | 0.00147 | 1.18250  |
| 498 | C | 27 | S     | Ryd( 4S) | 0.00031 | 2.05089  |
| 499 | C | 27 | S     | Ryd( 5S) | 0.00001 | 20.97416 |
| 500 | C | 27 | px    | Val( 2p) | 1.10685 | -0.07911 |
| 501 | C | 27 | px    | Ryd( 3p) | 0.00179 | 0.83743  |
| 502 | C | 27 | px    | Ryd( 4p) | 0.00036 | 1.43637  |
| 503 | C | 27 | py    | Val( 2p) | 1.02677 | -0.07600 |
| 504 | C | 27 | py    | Ryd( 3p) | 0.00164 | 0.79534  |
| 505 | C | 27 | py    | Ryd( 4p) | 0.00053 | 1.42394  |
| 506 | C | 27 | pz    | Val( 2p) | 1.10935 | -0.08034 |
| 507 | C | 27 | pz    | Ryd( 3p) | 0.00276 | 1.00954  |
| 508 | C | 27 | pz    | Ryd( 4p) | 0.00038 | 1.47703  |
| 509 | C | 27 | dxy   | Ryd( 3d) | 0.00082 | 2.49907  |
| 510 | C | 27 | dxz   | Ryd( 3d) | 0.00094 | 2.49227  |
| 511 | C | 27 | dyz   | Ryd( 3d) | 0.00051 | 2.23162  |
| 512 | C | 27 | dx2y2 | Ryd( 3d) | 0.00062 | 2.22601  |
| 513 | C | 27 | dz2   | Ryd( 3d) | 0.00066 | 2.41215  |
| 514 | C | 28 | S     | Cor( 1S) | 1.99941 | -9.72951 |
| 515 | C | 28 | S     | Val( 2S) | 1.11723 | -0.27656 |
| 516 | C | 28 | S     | Ryd( 3S) | 0.00058 | 1.19713  |
| 517 | C | 28 | S     | Ryd( 4S) | 0.00016 | 2.43073  |
| 518 | C | 28 | S     | Ryd( 5S) | 0.00000 | 20.59618 |
| 519 | C | 28 | px    | Val( 2p) | 1.15205 | -0.08329 |
| 520 | C | 28 | px    | Ryd( 3p) | 0.00060 | 0.55276  |
| 521 | C | 28 | px    | Ryd( 4p) | 0.00032 | 1.52696  |
| 522 | C | 28 | py    | Val( 2p) | 1.12394 | -0.08677 |



|     |   |    |       |          |         |          |
|-----|---|----|-------|----------|---------|----------|
| 523 | C | 28 | py    | Ryd( 3p) | 0.00055 | 0.55910  |
| 524 | C | 28 | py    | Ryd( 4p) | 0.00048 | 1.47266  |
| 525 | C | 28 | pz    | Val( 2p) | 1.21451 | -0.08399 |
| 526 | C | 28 | pz    | Ryd( 3p) | 0.00107 | 0.54223  |
| 527 | C | 28 | pz    | Ryd( 4p) | 0.00006 | 1.50317  |
| 528 | C | 28 | dxy   | Ryd( 3d) | 0.00064 | 2.47876  |
| 529 | C | 28 | dxz   | Ryd( 3d) | 0.00074 | 2.44375  |
| 530 | C | 28 | dyz   | Ryd( 3d) | 0.00025 | 2.15267  |
| 531 | C | 28 | dx2y2 | Ryd( 3d) | 0.00053 | 2.23459  |
| 532 | C | 28 | dz2   | Ryd( 3d) | 0.00055 | 2.38674  |
| 533 | C | 29 | S     | Cor( 1S) | 1.99937 | -9.75206 |
| 534 | C | 29 | S     | Val( 2S) | 0.99666 | -0.25611 |
| 535 | C | 29 | S     | Ryd( 4S) | 0.00118 | 1.71925  |
| 536 | C | 29 | S     | Ryd( 3S) | 0.00005 | 1.64589  |
| 537 | C | 29 | S     | Ryd( 5S) | 0.00000 | 21.20778 |
| 538 | C | 29 | px    | Val( 2p) | 1.06603 | -0.08945 |
| 539 | C | 29 | px    | Ryd( 3p) | 0.00178 | 0.95523  |
| 540 | C | 29 | px    | Ryd( 4p) | 0.00039 | 1.42277  |
| 541 | C | 29 | py    | Val( 2p) | 1.10882 | -0.09020 |
| 542 | C | 29 | py    | Ryd( 3p) | 0.00240 | 1.02511  |
| 543 | C | 29 | py    | Ryd( 4p) | 0.00029 | 1.35859  |
| 544 | C | 29 | pz    | Val( 2p) | 1.06596 | -0.08593 |
| 545 | C | 29 | pz    | Ryd( 3p) | 0.00153 | 0.85610  |
| 546 | C | 29 | pz    | Ryd( 4p) | 0.00043 | 1.28745  |
| 547 | C | 29 | dxy   | Ryd( 3d) | 0.00071 | 2.36723  |
| 548 | C | 29 | dxz   | Ryd( 3d) | 0.00062 | 2.22988  |
| 549 | C | 29 | dyz   | Ryd( 3d) | 0.00077 | 2.34713  |
| 550 | C | 29 | dx2y2 | Ryd( 3d) | 0.00062 | 2.31506  |
| 551 | C | 29 | dz2   | Ryd( 3d) | 0.00078 | 2.51690  |
| 552 | C | 30 | S     | Cor( 1S) | 1.99942 | -9.73526 |
| 553 | C | 30 | S     | Val( 2S) | 1.11595 | -0.28296 |
| 554 | C | 30 | S     | Ryd( 3S) | 0.00058 | 1.05897  |
| 555 | C | 30 | S     | Ryd( 4S) | 0.00013 | 2.70815  |
| 556 | C | 30 | S     | Ryd( 5S) | 0.00000 | 20.32400 |
| 557 | C | 30 | px    | Val( 2p) | 1.07853 | -0.09009 |
| 558 | C | 30 | px    | Ryd( 3p) | 0.00051 | 0.49738  |
| 559 | C | 30 | px    | Ryd( 4p) | 0.00055 | 1.44621  |
| 560 | C | 30 | py    | Val( 2p) | 1.21864 | -0.09112 |
| 561 | C | 30 | py    | Ryd( 3p) | 0.00122 | 0.54366  |
| 562 | C | 30 | py    | Ryd( 4p) | 0.00004 | 1.48711  |
| 563 | C | 30 | pz    | Val( 2p) | 1.19711 | -0.09233 |
| 564 | C | 30 | pz    | Ryd( 3p) | 0.00085 | 0.57101  |
| 565 | C | 30 | pz    | Ryd( 4p) | 0.00019 | 1.53517  |
| 566 | C | 30 | dxy   | Ryd( 3d) | 0.00076 | 2.38533  |
| 567 | C | 30 | dxz   | Ryd( 3d) | 0.00044 | 2.24749  |
| 568 | C | 30 | dyz   | Ryd( 3d) | 0.00027 | 2.21938  |
| 569 | C | 30 | dx2y2 | Ryd( 3d) | 0.00047 | 2.32363  |
| 570 | C | 30 | dz2   | Ryd( 3d) | 0.00071 | 2.46056  |
| 571 | C | 31 | S     | Cor( 1S) | 1.99874 | -9.78499 |
| 572 | C | 31 | S     | Val( 2S) | 0.86698 | -0.18374 |
| 573 | C | 31 | S     | Ryd( 3S) | 0.00118 | 0.96312  |
| 574 | C | 31 | S     | Ryd( 4S) | 0.00067 | 1.83273  |
| 575 | C | 31 | S     | Ryd( 5S) | 0.00000 | 21.56138 |
| 576 | C | 31 | px    | Val( 2p) | 0.93627 | -0.07394 |
| 577 | C | 31 | px    | Ryd( 3p) | 0.00435 | 1.02588  |
| 578 | C | 31 | px    | Ryd( 4p) | 0.00071 | 1.67581  |
| 579 | C | 31 | py    | Val( 2p) | 1.06601 | -0.09663 |
| 580 | C | 31 | py    | Ryd( 3p) | 0.00304 | 0.74573  |
| 581 | C | 31 | py    | Ryd( 4p) | 0.00043 | 1.61968  |
| 582 | C | 31 | pz    | Val( 2p) | 0.99331 | -0.07441 |
| 583 | C | 31 | pz    | Ryd( 3p) | 0.00401 | 0.94722  |
| 584 | C | 31 | pz    | Ryd( 4p) | 0.00062 | 1.67278  |
| 585 | C | 31 | dxy   | Ryd( 3d) | 0.00067 | 2.45194  |
| 586 | C | 31 | dxz   | Ryd( 3d) | 0.00093 | 2.47741  |
| 587 | C | 31 | dyz   | Ryd( 3d) | 0.00071 | 2.41789  |
| 588 | C | 31 | dx2y2 | Ryd( 3d) | 0.00069 | 2.18296  |
| 589 | C | 31 | dz2   | Ryd( 3d) | 0.00077 | 2.33110  |

|     |   |    |       |          |         |          |
|-----|---|----|-------|----------|---------|----------|
| 590 | C | 32 | S     | Cor( 1S) | 1.99898 | -9.74810 |
| 591 | C | 32 | S     | Val( 2S) | 0.92384 | -0.20127 |
| 592 | C | 32 | S     | Ryd( 3S) | 0.00167 | 0.91634  |
| 593 | C | 32 | S     | Ryd( 4S) | 0.00046 | 1.92102  |
| 594 | C | 32 | S     | Ryd( 5S) | 0.00000 | 21.08749 |
| 595 | C | 32 | px    | Val( 2p) | 1.02499 | -0.06910 |
| 596 | C | 32 | px    | Ryd( 3p) | 0.00302 | 1.01211  |
| 597 | C | 32 | px    | Ryd( 4p) | 0.00040 | 1.48412  |
| 598 | C | 32 | py    | Val( 2p) | 0.99497 | -0.08233 |
| 599 | C | 32 | py    | Ryd( 3p) | 0.00395 | 0.96976  |
| 600 | C | 32 | py    | Ryd( 4p) | 0.00026 | 1.47739  |
| 601 | C | 32 | pz    | Val( 2p) | 1.02810 | -0.06469 |
| 602 | C | 32 | pz    | Ryd( 3p) | 0.00329 | 0.95864  |
| 603 | C | 32 | pz    | Ryd( 4p) | 0.00043 | 1.52051  |
| 604 | C | 32 | dxy   | Ryd( 3d) | 0.00052 | 2.33017  |
| 605 | C | 32 | dxz   | Ryd( 3d) | 0.00074 | 2.40795  |
| 606 | C | 32 | dyz   | Ryd( 3d) | 0.00063 | 2.40188  |
| 607 | C | 32 | dx2y2 | Ryd( 3d) | 0.00068 | 2.11757  |
| 608 | C | 32 | dz2   | Ryd( 3d) | 0.00074 | 2.27647  |
| 609 | C | 33 | S     | Cor( 1S) | 1.99910 | -9.73591 |
| 610 | C | 33 | S     | Val( 2S) | 0.97357 | -0.21131 |
| 611 | C | 33 | S     | Ryd( 3S) | 0.00097 | 1.38310  |
| 612 | C | 33 | S     | Ryd( 4S) | 0.00009 | 1.41500  |
| 613 | C | 33 | S     | Ryd( 5S) | 0.00000 | 21.22051 |
| 614 | C | 33 | px    | Val( 2p) | 1.03872 | -0.07369 |
| 615 | C | 33 | px    | Ryd( 3p) | 0.00200 | 0.91960  |
| 616 | C | 33 | px    | Ryd( 4p) | 0.00041 | 1.27637  |
| 617 | C | 33 | py    | Val( 2p) | 1.05948 | -0.08727 |
| 618 | C | 33 | py    | Ryd( 3p) | 0.00214 | 0.94620  |
| 619 | C | 33 | py    | Ryd( 4p) | 0.00046 | 1.28409  |
| 620 | C | 33 | pz    | Val( 2p) | 1.13523 | -0.07099 |
| 621 | C | 33 | pz    | Ryd( 3p) | 0.00334 | 1.08613  |
| 622 | C | 33 | pz    | Ryd( 4p) | 0.00053 | 1.13493  |
| 623 | C | 33 | dxy   | Ryd( 3d) | 0.00058 | 2.39697  |
| 624 | C | 33 | dxz   | Ryd( 3d) | 0.00062 | 2.41235  |
| 625 | C | 33 | dyz   | Ryd( 3d) | 0.00057 | 2.26744  |
| 626 | C | 33 | dx2y2 | Ryd( 3d) | 0.00050 | 2.08573  |
| 627 | C | 33 | dz2   | Ryd( 3d) | 0.00051 | 2.25431  |
| 628 | C | 34 | S     | Cor( 1S) | 1.99920 | -9.73939 |
| 629 | C | 34 | S     | Val( 2S) | 0.97772 | -0.21491 |
| 630 | C | 34 | S     | Ryd( 3S) | 0.00082 | 1.05448  |
| 631 | C | 34 | S     | Ryd( 4S) | 0.00009 | 1.51899  |
| 632 | C | 34 | S     | Ryd( 5S) | 0.00000 | 21.16532 |
| 633 | C | 34 | px    | Val( 2p) | 1.10319 | -0.07500 |
| 634 | C | 34 | px    | Ryd( 3p) | 0.00324 | 1.00133  |
| 635 | C | 34 | px    | Ryd( 4p) | 0.00025 | 1.54675  |
| 636 | C | 34 | py    | Val( 2p) | 1.02219 | -0.08488 |
| 637 | C | 34 | py    | Ryd( 3p) | 0.00220 | 0.80375  |
| 638 | C | 34 | py    | Ryd( 4p) | 0.00024 | 1.16134  |
| 639 | C | 34 | pz    | Val( 2p) | 1.08072 | -0.06856 |
| 640 | C | 34 | pz    | Ryd( 3p) | 0.00323 | 0.94991  |
| 641 | C | 34 | pz    | Ryd( 4p) | 0.00036 | 1.34029  |
| 642 | C | 34 | dxy   | Ryd( 3d) | 0.00059 | 2.36671  |
| 643 | C | 34 | dxz   | Ryd( 3d) | 0.00057 | 2.34048  |
| 644 | C | 34 | dyz   | Ryd( 3d) | 0.00060 | 2.34841  |
| 645 | C | 34 | dx2y2 | Ryd( 3d) | 0.00042 | 2.04093  |
| 646 | C | 34 | dz2   | Ryd( 3d) | 0.00064 | 2.24440  |
| 647 | C | 35 | S     | Cor( 1S) | 1.99909 | -9.73496 |
| 648 | C | 35 | S     | Val( 2S) | 0.97404 | -0.21028 |
| 649 | C | 35 | S     | Ryd( 3S) | 0.00098 | 1.40619  |
| 650 | C | 35 | S     | Ryd( 4S) | 0.00009 | 1.44430  |
| 651 | C | 35 | S     | Ryd( 5S) | 0.00000 | 21.26986 |
| 652 | C | 35 | px    | Val( 2p) | 1.09279 | -0.07477 |
| 653 | C | 35 | px    | Ryd( 3p) | 0.00279 | 0.98350  |
| 654 | C | 35 | px    | Ryd( 4p) | 0.00038 | 1.21629  |
| 655 | C | 35 | py    | Val( 2p) | 1.09130 | -0.08663 |
| 656 | C | 35 | py    | Ryd( 3p) | 0.00262 | 0.98917  |
| 657 | C | 35 | py    | Ryd( 4p) | 0.00043 | 1.24389  |

|     |   |    |                                |           |         |          |
|-----|---|----|--------------------------------|-----------|---------|----------|
| 658 | C | 35 | pz                             | Val ( 2p) | 1.04813 | -0.06716 |
| 659 | C | 35 | pz                             | Ryd( 3p)  | 0.00219 | 1.00746  |
| 660 | C | 35 | pz                             | Ryd( 4p)  | 0.00032 | 1.39364  |
| 661 | C | 35 | dx <sub>y</sub>                | Ryd( 3d)  | 0.00056 | 2.34718  |
| 662 | C | 35 | dx <sub>z</sub>                | Ryd( 3d)  | 0.00067 | 2.40867  |
| 663 | C | 35 | dy <sub>z</sub>                | Ryd( 3d)  | 0.00057 | 2.32347  |
| 664 | C | 35 | dx <sup>2</sup> y <sup>2</sup> | Ryd( 3d)  | 0.00041 | 2.05923  |
| 665 | C | 35 | dz <sup>2</sup>                | Ryd( 3d)  | 0.00058 | 2.28590  |
| 666 | C | 36 | S                              | Cor( 1S)  | 1.99898 | -9.74600 |
| 667 | C | 36 | S                              | Val( 2S)  | 0.92317 | -0.19849 |
| 668 | C | 36 | S                              | Ryd( 3S)  | 0.00166 | 0.89962  |
| 669 | C | 36 | S                              | Ryd( 4S)  | 0.00046 | 1.93233  |
| 670 | C | 36 | S                              | Ryd( 5S)  | 0.00000 | 21.14677 |
| 671 | C | 36 | px                             | Val( 2p)  | 1.02297 | -0.07009 |
| 672 | C | 36 | px                             | Ryd( 3p)  | 0.00274 | 0.90945  |
| 673 | C | 36 | px                             | Ryd( 4p)  | 0.00043 | 1.54107  |
| 674 | C | 36 | py                             | Val( 2p)  | 0.99698 | -0.07820 |
| 675 | C | 36 | py                             | Ryd( 3p)  | 0.00366 | 0.92995  |
| 676 | C | 36 | py                             | Ryd( 4p)  | 0.00031 | 1.53216  |
| 677 | C | 36 | pz                             | Val( 2p)  | 1.02035 | -0.06062 |
| 678 | C | 36 | pz                             | Ryd( 3p)  | 0.00404 | 1.13364  |
| 679 | C | 36 | pz                             | Ryd( 4p)  | 0.00030 | 1.53426  |
| 680 | C | 36 | dx <sub>y</sub>                | Ryd( 3d)  | 0.00063 | 2.43532  |
| 681 | C | 36 | dx <sub>z</sub>                | Ryd( 3d)  | 0.00085 | 2.41863  |
| 682 | C | 36 | dy <sub>z</sub>                | Ryd( 3d)  | 0.00056 | 2.36572  |
| 683 | C | 36 | dx <sup>2</sup> y <sup>2</sup> | Ryd( 3d)  | 0.00065 | 2.09176  |
| 684 | C | 36 | dz <sup>2</sup>                | Ryd( 3d)  | 0.00067 | 2.23569  |
| 685 | C | 37 | S                              | Cor( 1S)  | 1.99937 | -9.75573 |
| 686 | C | 37 | S                              | Val( 2S)  | 0.99683 | -0.26043 |
| 687 | C | 37 | S                              | Ryd( 4S)  | 0.00118 | 1.70859  |
| 688 | C | 37 | S                              | Ryd( 3S)  | 0.00006 | 1.57394  |
| 689 | C | 37 | S                              | Ryd( 5S)  | 0.00000 | 21.16555 |
| 690 | C | 37 | px                             | Val( 2p)  | 1.11426 | -0.09275 |
| 691 | C | 37 | px                             | Ryd( 3p)  | 0.00214 | 0.88810  |
| 692 | C | 37 | px                             | Ryd( 4p)  | 0.00038 | 1.32289  |
| 693 | C | 37 | py                             | Val( 2p)  | 1.03655 | -0.09163 |
| 694 | C | 37 | py                             | Ryd( 3p)  | 0.00112 | 0.89406  |
| 695 | C | 37 | py                             | Ryd( 4p)  | 0.00042 | 1.33184  |
| 696 | C | 37 | pz                             | Val( 2p)  | 1.09213 | -0.09363 |
| 697 | C | 37 | pz                             | Ryd( 3p)  | 0.00234 | 1.04974  |
| 698 | C | 37 | pz                             | Ryd( 4p)  | 0.00034 | 1.43766  |
| 699 | C | 37 | dx <sub>y</sub>                | Ryd( 3d)  | 0.00075 | 2.44324  |
| 700 | C | 37 | dx <sub>z</sub>                | Ryd( 3d)  | 0.00095 | 2.48589  |
| 701 | C | 37 | dy <sub>z</sub>                | Ryd( 3d)  | 0.00047 | 2.17499  |
| 702 | C | 37 | dx <sup>2</sup> y <sup>2</sup> | Ryd( 3d)  | 0.00068 | 2.25930  |
| 703 | C | 37 | dz <sup>2</sup>                | Ryd( 3d)  | 0.00062 | 2.38633  |
| 704 | C | 38 | S                              | Cor( 1S)  | 1.99943 | -9.73821 |
| 705 | C | 38 | S                              | Val( 2S)  | 1.11477 | -0.28570 |
| 706 | C | 38 | S                              | Ryd( 3S)  | 0.00056 | 1.10431  |
| 707 | C | 38 | S                              | Ryd( 4S)  | 0.00012 | 2.69113  |
| 708 | C | 38 | S                              | Ryd( 5S)  | 0.00000 | 20.31072 |
| 709 | C | 38 | px                             | Val( 2p)  | 1.19793 | -0.09728 |
| 710 | C | 38 | px                             | Ryd( 3p)  | 0.00082 | 0.52789  |
| 711 | C | 38 | px                             | Ryd( 4p)  | 0.00019 | 1.52250  |
| 712 | C | 38 | py                             | Val( 2p)  | 1.21569 | -0.09314 |
| 713 | C | 38 | py                             | Ryd( 3p)  | 0.00146 | 0.57925  |
| 714 | C | 38 | py                             | Ryd( 4p)  | 0.00004 | 1.49823  |
| 715 | C | 38 | pz                             | Val( 2p)  | 1.08328 | -0.09308 |
| 716 | C | 38 | pz                             | Ryd( 3p)  | 0.00039 | 0.48831  |
| 717 | C | 38 | pz                             | Ryd( 4p)  | 0.00052 | 1.45163  |
| 718 | C | 38 | dx <sub>y</sub>                | Ryd( 3d)  | 0.00060 | 2.41100  |
| 719 | C | 38 | dx <sub>z</sub>                | Ryd( 3d)  | 0.00079 | 2.44149  |
| 720 | C | 38 | dy <sub>z</sub>                | Ryd( 3d)  | 0.00028 | 2.12275  |
| 721 | C | 38 | dx <sup>2</sup> y <sup>2</sup> | Ryd( 3d)  | 0.00031 | 2.23543  |
| 722 | C | 38 | dz <sup>2</sup>                | Ryd( 3d)  | 0.00066 | 2.40025  |
| 723 | C | 39 | S                              | Cor( 1S)  | 1.99936 | -9.75034 |
| 724 | C | 39 | S                              | Val( 2S)  | 0.99689 | -0.25484 |

|     |   |    |       |          |         |          |
|-----|---|----|-------|----------|---------|----------|
| 725 | C | 39 | S     | Ryd( 4S) | 0.00120 | 1.71446  |
| 726 | C | 39 | S     | Ryd( 3S) | 0.00006 | 1.65794  |
| 727 | C | 39 | S     | Ryd( 5S) | 0.00000 | 21.21182 |
| 728 | C | 39 | px    | Val( 2p) | 1.13377 | -0.08945 |
| 729 | C | 39 | px    | Ryd( 3p) | 0.00280 | 0.98747  |
| 730 | C | 39 | px    | Ryd( 4p) | 0.00026 | 1.37338  |
| 731 | C | 39 | py    | Val( 2p) | 1.04734 | -0.08697 |
| 732 | C | 39 | py    | Ryd( 3p) | 0.00156 | 0.97627  |
| 733 | C | 39 | py    | Ryd( 4p) | 0.00042 | 1.45775  |
| 734 | C | 39 | pz    | Val( 2p) | 1.06175 | -0.08554 |
| 735 | C | 39 | pz    | Ryd( 3p) | 0.00139 | 0.86066  |
| 736 | C | 39 | pz    | Ryd( 4p) | 0.00048 | 1.29633  |
| 737 | C | 39 | dxy   | Ryd( 3d) | 0.00055 | 2.22916  |
| 738 | C | 39 | dxz   | Ryd( 3d) | 0.00077 | 2.47088  |
| 739 | C | 39 | dyz   | Ryd( 3d) | 0.00078 | 2.39566  |
| 740 | C | 39 | dx2y2 | Ryd( 3d) | 0.00073 | 2.42226  |
| 741 | C | 39 | dz2   | Ryd( 3d) | 0.00063 | 2.27165  |
| 742 | C | 40 | S     | Cor( 1S) | 1.99942 | -9.73507 |
| 743 | C | 40 | S     | Val( 2S) | 1.11676 | -0.28274 |
| 744 | C | 40 | S     | Ryd( 3S) | 0.00058 | 1.09141  |
| 745 | C | 40 | S     | Ryd( 4S) | 0.00013 | 2.62677  |
| 746 | C | 40 | S     | Ryd( 5S) | 0.00000 | 20.37731 |
| 747 | C | 40 | px    | Val( 2p) | 1.21154 | -0.09154 |
| 748 | C | 40 | px    | Ryd( 3p) | 0.00103 | 0.52734  |
| 749 | C | 40 | px    | Ryd( 4p) | 0.00009 | 1.48544  |
| 750 | C | 40 | py    | Val( 2p) | 1.06606 | -0.09064 |
| 751 | C | 40 | py    | Ryd( 3p) | 0.00037 | 0.50375  |
| 752 | C | 40 | py    | Ryd( 4p) | 0.00062 | 1.44537  |
| 753 | C | 40 | pz    | Val( 2p) | 1.21477 | -0.08968 |
| 754 | C | 40 | pz    | Ryd( 3p) | 0.00099 | 0.56998  |
| 755 | C | 40 | pz    | Ryd( 4p) | 0.00009 | 1.53712  |
| 756 | C | 40 | dxy   | Ryd( 3d) | 0.00048 | 2.22888  |
| 757 | C | 40 | dxz   | Ryd( 3d) | 0.00058 | 2.41521  |
| 758 | C | 40 | dyz   | Ryd( 3d) | 0.00064 | 2.32092  |
| 759 | C | 40 | dx2y2 | Ryd( 3d) | 0.00062 | 2.41041  |
| 760 | C | 40 | dz2   | Ryd( 3d) | 0.00031 | 2.26524  |
| 761 | C | 41 | S     | Cor( 1S) | 1.99874 | -9.77446 |
| 762 | C | 41 | S     | Val( 2S) | 0.86843 | -0.17345 |
| 763 | C | 41 | S     | Ryd( 3S) | 0.00122 | 0.96604  |
| 764 | C | 41 | S     | Ryd( 4S) | 0.00066 | 1.89331  |
| 765 | C | 41 | S     | Ryd( 5S) | 0.00000 | 21.52802 |
| 766 | C | 41 | px    | Val( 2p) | 1.04871 | -0.09375 |
| 767 | C | 41 | px    | Ryd( 3p) | 0.00347 | 0.78065  |
| 768 | C | 41 | px    | Ryd( 4p) | 0.00045 | 1.63167  |
| 769 | C | 41 | py    | Val( 2p) | 0.88299 | -0.04944 |
| 770 | C | 41 | py    | Ryd( 3p) | 0.00486 | 1.15418  |
| 771 | C | 41 | py    | Ryd( 4p) | 0.00085 | 1.71252  |
| 772 | C | 41 | pz    | Val( 2p) | 1.06475 | -0.06910 |
| 773 | C | 41 | pz    | Ryd( 3p) | 0.00269 | 0.80439  |
| 774 | C | 41 | pz    | Ryd( 4p) | 0.00045 | 1.65745  |
| 775 | C | 41 | dxy   | Ryd( 3d) | 0.00064 | 2.37627  |
| 776 | C | 41 | dxz   | Ryd( 3d) | 0.00069 | 2.37323  |
| 777 | C | 41 | dyz   | Ryd( 3d) | 0.00097 | 2.47483  |
| 778 | C | 41 | dx2y2 | Ryd( 3d) | 0.00067 | 2.36785  |
| 779 | C | 41 | dz2   | Ryd( 3d) | 0.00087 | 2.33538  |
| 780 | C | 42 | S     | Cor( 1S) | 1.99899 | -9.73542 |
| 781 | C | 42 | S     | Val( 2S) | 0.92637 | -0.18757 |
| 782 | C | 42 | S     | Ryd( 3S) | 0.00157 | 0.92565  |
| 783 | C | 42 | S     | Ryd( 4S) | 0.00042 | 2.00385  |
| 784 | C | 42 | S     | Ryd( 5S) | 0.00000 | 21.18354 |
| 785 | C | 42 | px    | Val( 2p) | 0.98361 | -0.07637 |
| 786 | C | 42 | px    | Ryd( 3p) | 0.00287 | 0.86919  |
| 787 | C | 42 | px    | Ryd( 4p) | 0.00022 | 1.42247  |
| 788 | C | 42 | py    | Val( 2p) | 1.03376 | -0.04839 |
| 789 | C | 42 | py    | Ryd( 3p) | 0.00309 | 0.98801  |
| 790 | C | 42 | py    | Ryd( 4p) | 0.00049 | 1.61770  |
| 791 | C | 42 | pz    | Val( 2p) | 1.01656 | -0.04834 |
| 792 | C | 42 | pz    | Ryd( 3p) | 0.00402 | 1.05397  |

|     |   |    |       |          |         |          |
|-----|---|----|-------|----------|---------|----------|
| 793 | C | 42 | pz    | Ryd( 4p) | 0.00048 | 1.54207  |
| 794 | C | 42 | dxy   | Ryd( 3d) | 0.00063 | 2.30461  |
| 795 | C | 42 | dxz   | Ryd( 3d) | 0.00059 | 2.31531  |
| 796 | C | 42 | dyz   | Ryd( 3d) | 0.00076 | 2.43503  |
| 797 | C | 42 | dx2y2 | Ryd( 3d) | 0.00061 | 2.22109  |
| 798 | C | 42 | dz2   | Ryd( 3d) | 0.00076 | 2.35889  |
| 799 | C | 43 | S     | Cor( 1S) | 1.99910 | -9.72422 |
| 800 | C | 43 | S     | Val( 2S) | 0.97460 | -0.19998 |
| 801 | C | 43 | S     | Ryd( 4S) | 0.00095 | 1.38719  |
| 802 | C | 43 | S     | Ryd( 3S) | 0.00009 | 1.35718  |
| 803 | C | 43 | S     | Ryd( 5S) | 0.00000 | 21.29913 |
| 804 | C | 43 | px    | Val( 2p) | 1.03144 | -0.08260 |
| 805 | C | 43 | px    | Ryd( 3p) | 0.00167 | 0.85705  |
| 806 | C | 43 | px    | Ryd( 4p) | 0.00046 | 1.25014  |
| 807 | C | 43 | py    | Val( 2p) | 1.06940 | -0.05599 |
| 808 | C | 43 | py    | Ryd( 3p) | 0.00265 | 0.94334  |
| 809 | C | 43 | py    | Ryd( 4p) | 0.00052 | 1.21554  |
| 810 | C | 43 | pz    | Val( 2p) | 1.13491 | -0.05907 |
| 811 | C | 43 | pz    | Ryd( 3p) | 0.00340 | 1.16033  |
| 812 | C | 43 | pz    | Ryd( 4p) | 0.00045 | 1.21641  |
| 813 | C | 43 | dxy   | Ryd( 3d) | 0.00057 | 2.32479  |
| 814 | C | 43 | dxz   | Ryd( 3d) | 0.00049 | 2.27323  |
| 815 | C | 43 | dyz   | Ryd( 3d) | 0.00062 | 2.45037  |
| 816 | C | 43 | dx2y2 | Ryd( 3d) | 0.00054 | 2.18782  |
| 817 | C | 43 | dz2   | Ryd( 3d) | 0.00054 | 2.24141  |
| 818 | C | 44 | S     | Cor( 1S) | 1.99919 | -9.73043 |
| 819 | C | 44 | S     | Val( 2S) | 0.97697 | -0.20579 |
| 820 | C | 44 | S     | Ryd( 3S) | 0.00078 | 1.03819  |
| 821 | C | 44 | S     | Ryd( 4S) | 0.00009 | 1.46269  |
| 822 | C | 44 | S     | Ryd( 5S) | 0.00000 | 21.17618 |
| 823 | C | 44 | px    | Val( 2p) | 1.02635 | -0.08557 |
| 824 | C | 44 | px    | Ryd( 3p) | 0.00200 | 0.77998  |
| 825 | C | 44 | px    | Ryd( 4p) | 0.00030 | 1.22824  |
| 826 | C | 44 | py    | Val( 2p) | 1.13898 | -0.05998 |
| 827 | C | 44 | py    | Ryd( 3p) | 0.00389 | 1.05373  |
| 828 | C | 44 | py    | Ryd( 4p) | 0.00039 | 1.63782  |
| 829 | C | 44 | pz    | Val( 2p) | 1.04297 | -0.05741 |
| 830 | C | 44 | pz    | Ryd( 3p) | 0.00293 | 0.87832  |
| 831 | C | 44 | pz    | Ryd( 4p) | 0.00029 | 1.15787  |
| 832 | C | 44 | dxy   | Ryd( 3d) | 0.00046 | 2.25586  |
| 833 | C | 44 | dxz   | Ryd( 3d) | 0.00059 | 2.32161  |
| 834 | C | 44 | dyz   | Ryd( 3d) | 0.00073 | 2.41289  |
| 835 | C | 44 | dx2y2 | Ryd( 3d) | 0.00039 | 2.11101  |
| 836 | C | 44 | dz2   | Ryd( 3d) | 0.00064 | 2.27797  |
| 837 | C | 45 | S     | Cor( 1S) | 1.99909 | -9.72713 |
| 838 | C | 45 | S     | Val( 2S) | 0.97249 | -0.20254 |
| 839 | C | 45 | S     | Ryd( 4S) | 0.00097 | 1.39850  |
| 840 | C | 45 | S     | Ryd( 3S) | 0.00010 | 1.37146  |
| 841 | C | 45 | S     | Ryd( 5S) | 0.00000 | 21.24969 |
| 842 | C | 45 | px    | Val( 2p) | 1.07482 | -0.08723 |
| 843 | C | 45 | px    | Ryd( 3p) | 0.00228 | 0.88105  |
| 844 | C | 45 | px    | Ryd( 4p) | 0.00061 | 1.19289  |
| 845 | C | 45 | py    | Val( 2p) | 1.07173 | -0.05997 |
| 846 | C | 45 | py    | Ryd( 3p) | 0.00265 | 0.94295  |
| 847 | C | 45 | py    | Ryd( 4p) | 0.00049 | 1.18639  |
| 848 | C | 45 | pz    | Val( 2p) | 1.09377 | -0.06133 |
| 849 | C | 45 | pz    | Ryd( 3p) | 0.00276 | 1.11724  |
| 850 | C | 45 | pz    | Ryd( 4p) | 0.00032 | 1.36592  |
| 851 | C | 45 | dxy   | Ryd( 3d) | 0.00055 | 2.30409  |
| 852 | C | 45 | dxz   | Ryd( 3d) | 0.00053 | 2.24942  |
| 853 | C | 45 | dyz   | Ryd( 3d) | 0.00064 | 2.46008  |
| 854 | C | 45 | dx2y2 | Ryd( 3d) | 0.00049 | 2.16994  |
| 855 | C | 45 | dz2   | Ryd( 3d) | 0.00055 | 2.27483  |
| 856 | C | 46 | S     | Cor( 1S) | 1.99898 | -9.73862 |
| 857 | C | 46 | S     | Val( 2S) | 0.92411 | -0.19225 |
| 858 | C | 46 | S     | Ryd( 3S) | 0.00168 | 0.92561  |
| 859 | C | 46 | S     | Ryd( 4S) | 0.00045 | 1.95497  |

|     |   |    |       |          |         |          |
|-----|---|----|-------|----------|---------|----------|
| 860 | C | 46 | S     | Ryd( 5S) | 0.00000 | 21.15552 |
| 861 | C | 46 | px    | Val( 2p) | 1.00147 | -0.08158 |
| 862 | C | 46 | px    | Ryd( 3p) | 0.00315 | 0.83146  |
| 863 | C | 46 | px    | Ryd( 4p) | 0.00029 | 1.48471  |
| 864 | C | 46 | py    | Val( 2p) | 1.03733 | -0.05525 |
| 865 | C | 46 | py    | Ryd( 3p) | 0.00277 | 0.98313  |
| 866 | C | 46 | py    | Ryd( 4p) | 0.00044 | 1.53253  |
| 867 | C | 46 | pz    | Val( 2p) | 1.01373 | -0.05341 |
| 868 | C | 46 | pz    | Ryd( 3p) | 0.00460 | 1.14572  |
| 869 | C | 46 | pz    | Ryd( 4p) | 0.00033 | 1.58237  |
| 870 | C | 46 | dxxy  | Ryd( 3d) | 0.00058 | 2.31783  |
| 871 | C | 46 | dxz   | Ryd( 3d) | 0.00064 | 2.39191  |
| 872 | C | 46 | dyz   | Ryd( 3d) | 0.00076 | 2.40530  |
| 873 | C | 46 | dx2y2 | Ryd( 3d) | 0.00063 | 2.18208  |
| 874 | C | 46 | dz2   | Ryd( 3d) | 0.00071 | 2.27726  |
| 875 | C | 47 | S     | Cor( 1S) | 1.99935 | -9.73178 |
| 876 | C | 47 | S     | Val( 2S) | 0.99796 | -0.23625 |
| 877 | C | 47 | S     | Ryd( 3S) | 0.00123 | 1.28825  |
| 878 | C | 47 | S     | Ryd( 4S) | 0.00025 | 2.16423  |
| 879 | C | 47 | S     | Ryd( 5S) | 0.00001 | 20.81049 |
| 880 | C | 47 | px    | Val( 2p) | 1.08597 | -0.06987 |
| 881 | C | 47 | px    | Ryd( 3p) | 0.00171 | 0.81683  |
| 882 | C | 47 | px    | Ryd( 4p) | 0.00046 | 1.53052  |
| 883 | C | 47 | py    | Val( 2p) | 1.09913 | -0.07077 |
| 884 | C | 47 | py    | Ryd( 3p) | 0.00277 | 0.83818  |
| 885 | C | 47 | py    | Ryd( 4p) | 0.00055 | 1.53007  |
| 886 | C | 47 | pz    | Val( 2p) | 1.07483 | -0.07041 |
| 887 | C | 47 | pz    | Ryd( 3p) | 0.00201 | 0.89556  |
| 888 | C | 47 | pz    | Ryd( 4p) | 0.00034 | 1.49744  |
| 889 | C | 47 | dxxy  | Ryd( 3d) | 0.00090 | 2.55930  |
| 890 | C | 47 | dxz   | Ryd( 3d) | 0.00095 | 2.59783  |
| 891 | C | 47 | dyz   | Ryd( 3d) | 0.00094 | 2.56479  |
| 892 | C | 47 | dx2y2 | Ryd( 3d) | 0.00037 | 2.05846  |
| 893 | C | 47 | dz2   | Ryd( 3d) | 0.00034 | 2.13083  |
| 894 | C | 48 | S     | Cor( 1S) | 1.99941 | -9.72114 |
| 895 | C | 48 | S     | Val( 2S) | 1.11731 | -0.26757 |
| 896 | C | 48 | S     | Ryd( 3S) | 0.00060 | 1.20273  |
| 897 | C | 48 | S     | Ryd( 4S) | 0.00018 | 2.48676  |
| 898 | C | 48 | S     | Ryd( 5S) | 0.00000 | 20.56879 |
| 899 | C | 48 | px    | Val( 2p) | 1.16986 | -0.07427 |
| 900 | C | 48 | px    | Ryd( 3p) | 0.00074 | 0.57852  |
| 901 | C | 48 | px    | Ryd( 4p) | 0.00023 | 1.55312  |
| 902 | C | 48 | py    | Val( 2p) | 1.16751 | -0.07728 |
| 903 | C | 48 | py    | Ryd( 3p) | 0.00085 | 0.57206  |
| 904 | C | 48 | py    | Ryd( 4p) | 0.00029 | 1.49942  |
| 905 | C | 48 | pz    | Val( 2p) | 1.15218 | -0.07657 |
| 906 | C | 48 | pz    | Ryd( 3p) | 0.00064 | 0.52536  |
| 907 | C | 48 | pz    | Ryd( 4p) | 0.00032 | 1.49306  |
| 908 | C | 48 | dxxy  | Ryd( 3d) | 0.00079 | 2.52410  |
| 909 | C | 48 | dxz   | Ryd( 3d) | 0.00080 | 2.52346  |
| 910 | C | 48 | dyz   | Ryd( 3d) | 0.00080 | 2.49584  |
| 911 | C | 48 | dx2y2 | Ryd( 3d) | 0.00014 | 2.08995  |
| 912 | C | 48 | dz2   | Ryd( 3d) | 0.00020 | 2.10733  |
| 913 | C | 49 | S     | Cor( 1S) | 1.99937 | -9.74876 |
| 914 | C | 49 | S     | Val( 2S) | 0.99642 | -0.25314 |
| 915 | C | 49 | S     | Ryd( 4S) | 0.00119 | 1.72400  |
| 916 | C | 49 | S     | Ryd( 3S) | 0.00005 | 1.70258  |
| 917 | C | 49 | S     | Ryd( 5S) | 0.00000 | 21.21593 |
| 918 | C | 49 | px    | Val( 2p) | 1.06146 | -0.08674 |
| 919 | C | 49 | px    | Ryd( 3p) | 0.00185 | 0.95158  |
| 920 | C | 49 | px    | Ryd( 4p) | 0.00042 | 1.42943  |
| 921 | C | 49 | py    | Val( 2p) | 1.15137 | -0.08780 |
| 922 | C | 49 | py    | Ryd( 3p) | 0.00299 | 0.94354  |
| 923 | C | 49 | py    | Ryd( 4p) | 0.00029 | 1.36062  |
| 924 | C | 49 | pz    | Val( 2p) | 1.03217 | -0.08423 |
| 925 | C | 49 | pz    | Ryd( 3p) | 0.00115 | 0.89450  |
| 926 | C | 49 | pz    | Ryd( 4p) | 0.00049 | 1.33938  |
| 927 | C | 49 | dxxy  | Ryd( 3d) | 0.00071 | 2.32475  |

|     |   |    |       |          |         |          |
|-----|---|----|-------|----------|---------|----------|
| 928 | C | 49 | dxz   | Ryd( 3d) | 0.00055 | 2.20260  |
| 929 | C | 49 | dyz   | Ryd( 3d) | 0.00064 | 2.43416  |
| 930 | C | 49 | dx2y2 | Ryd( 3d) | 0.00066 | 2.36549  |
| 931 | C | 49 | dz2   | Ryd( 3d) | 0.00094 | 2.45735  |
| 932 | C | 50 | S     | Cor( 1S) | 1.99942 | -9.73331 |
| 933 | C | 50 | S     | Val( 2S) | 1.11610 | -0.28088 |
| 934 | C | 50 | S     | Ryd( 3S) | 0.00060 | 1.02795  |
| 935 | C | 50 | S     | Ryd( 4S) | 0.00014 | 2.68109  |
| 936 | C | 50 | S     | Ryd( 5S) | 0.00000 | 20.38211 |
| 937 | C | 50 | px    | Val( 2p) | 1.06153 | -0.08844 |
| 938 | C | 50 | px    | Ryd( 3p) | 0.00039 | 0.49390  |
| 939 | C | 50 | px    | Ryd( 4p) | 0.00063 | 1.44952  |
| 940 | C | 50 | py    | Val( 2p) | 1.21303 | -0.09060 |
| 941 | C | 50 | py    | Ryd( 3p) | 0.00094 | 0.52986  |
| 942 | C | 50 | py    | Ryd( 4p) | 0.00012 | 1.51130  |
| 943 | C | 50 | pz    | Val( 2p) | 1.21897 | -0.08794 |
| 944 | C | 50 | pz    | Ryd( 3p) | 0.00125 | 0.58966  |
| 945 | C | 50 | pz    | Ryd( 4p) | 0.00004 | 1.52441  |
| 946 | C | 50 | dxy   | Ryd( 3d) | 0.00068 | 2.34181  |
| 947 | C | 50 | dxz   | Ryd( 3d) | 0.00041 | 2.17383  |
| 948 | C | 50 | dyz   | Ryd( 3d) | 0.00056 | 2.41185  |
| 949 | C | 50 | dx2y2 | Ryd( 3d) | 0.00047 | 2.34147  |
| 950 | C | 50 | dz2   | Ryd( 3d) | 0.00052 | 2.38171  |
| 951 | C | 51 | S     | Cor( 1S) | 1.99937 | -9.74918 |
| 952 | C | 51 | S     | Val( 2S) | 0.99674 | -0.25373 |
| 953 | C | 51 | S     | Ryd( 4S) | 0.00117 | 1.73553  |
| 954 | C | 51 | S     | Ryd( 3S) | 0.00006 | 1.57332  |
| 955 | C | 51 | S     | Ryd( 5S) | 0.00000 | 21.16299 |
| 956 | C | 51 | px    | Val( 2p) | 1.06139 | -0.08497 |
| 957 | C | 51 | px    | Ryd( 3p) | 0.00157 | 0.85849  |
| 958 | C | 51 | px    | Ryd( 4p) | 0.00041 | 1.35384  |
| 959 | C | 51 | py    | Val( 2p) | 1.07414 | -0.08694 |
| 960 | C | 51 | py    | Ryd( 3p) | 0.00190 | 0.90903  |
| 961 | C | 51 | py    | Ryd( 4p) | 0.00041 | 1.41113  |
| 962 | C | 51 | pz    | Val( 2p) | 1.10859 | -0.08750 |
| 963 | C | 51 | pz    | Ryd( 3p) | 0.00248 | 1.04285  |
| 964 | C | 51 | pz    | Ryd( 4p) | 0.00028 | 1.36614  |
| 965 | C | 51 | dxy   | Ryd( 3d) | 0.00081 | 2.46253  |
| 966 | C | 51 | dxz   | Ryd( 3d) | 0.00083 | 2.44346  |
| 967 | C | 51 | dyz   | Ryd( 3d) | 0.00090 | 2.50885  |
| 968 | C | 51 | dx2y2 | Ryd( 3d) | 0.00052 | 2.14114  |
| 969 | C | 51 | dz2   | Ryd( 3d) | 0.00042 | 2.21640  |
| 970 | C | 52 | S     | Cor( 1S) | 1.99942 | -9.73327 |
| 971 | C | 52 | S     | Val( 2S) | 1.11615 | -0.28084 |
| 972 | C | 52 | S     | Ryd( 3S) | 0.00057 | 1.06296  |
| 973 | C | 52 | S     | Ryd( 4S) | 0.00014 | 2.73358  |
| 974 | C | 52 | S     | Ryd( 5S) | 0.00000 | 20.31784 |
| 975 | C | 52 | px    | Val( 2p) | 1.15435 | -0.09140 |
| 976 | C | 52 | px    | Ryd( 3p) | 0.00072 | 0.54051  |
| 977 | C | 52 | px    | Ryd( 4p) | 0.00034 | 1.51293  |
| 978 | C | 52 | py    | Val( 2p) | 1.13614 | -0.08725 |
| 979 | C | 52 | py    | Ryd( 3p) | 0.00080 | 0.52547  |
| 980 | C | 52 | py    | Ryd( 4p) | 0.00035 | 1.47892  |
| 981 | C | 52 | pz    | Val( 2p) | 1.20333 | -0.08849 |
| 982 | C | 52 | pz    | Ryd( 3p) | 0.00111 | 0.54168  |
| 983 | C | 52 | pz    | Ryd( 4p) | 0.00008 | 1.50030  |
| 984 | C | 52 | dxy   | Ryd( 3d) | 0.00065 | 2.45172  |
| 985 | C | 52 | dxz   | Ryd( 3d) | 0.00050 | 2.31901  |
| 986 | C | 52 | dyz   | Ryd( 3d) | 0.00085 | 2.50911  |
| 987 | C | 52 | dx2y2 | Ryd( 3d) | 0.00037 | 2.17055  |
| 988 | C | 52 | dz2   | Ryd( 3d) | 0.00027 | 2.19288  |
| 989 | C | 53 | S     | Cor( 1S) | 1.99935 | -9.73236 |
| 990 | C | 53 | S     | Val( 2S) | 0.99743 | -0.23675 |
| 991 | C | 53 | S     | Ryd( 3S) | 0.00131 | 1.22161  |
| 992 | C | 53 | S     | Ryd( 4S) | 0.00027 | 2.16940  |
| 993 | C | 53 | S     | Ryd( 5S) | 0.00001 | 20.88206 |
| 994 | C | 53 | px    | Val( 2p) | 1.06632 | -0.07189 |

|      |   |    |       |          |         |          |
|------|---|----|-------|----------|---------|----------|
| 995  | C | 53 | px    | Ryd( 3p) | 0.00232 | 0.93201  |
| 996  | C | 53 | px    | Ryd( 4p) | 0.00048 | 1.57881  |
| 997  | C | 53 | py    | Val( 2p) | 1.15979 | -0.07242 |
| 998  | C | 53 | py    | Ryd( 3p) | 0.00250 | 0.87094  |
| 999  | C | 53 | py    | Ryd( 4p) | 0.00035 | 1.50671  |
| 1000 | C | 53 | pz    | Val( 2p) | 1.02817 | -0.06705 |
| 1001 | C | 53 | pz    | Ryd( 3p) | 0.00150 | 0.75769  |
| 1002 | C | 53 | pz    | Ryd( 4p) | 0.00049 | 1.45272  |
| 1003 | C | 53 | dxy   | Ryd( 3d) | 0.00070 | 2.31075  |
| 1004 | C | 53 | dxz   | Ryd( 3d) | 0.00056 | 2.26310  |
| 1005 | C | 53 | dyz   | Ryd( 3d) | 0.00054 | 2.29526  |
| 1006 | C | 53 | dx2y2 | Ryd( 3d) | 0.00070 | 2.43751  |
| 1007 | C | 53 | dz2   | Ryd( 3d) | 0.00101 | 2.61180  |
| 1008 | C | 54 | S     | Cor( 1S) | 1.99941 | -9.72189 |
| 1009 | C | 54 | S     | Val( 2S) | 1.11757 | -0.26857 |
| 1010 | C | 54 | S     | Ryd( 3S) | 0.00059 | 1.19756  |
| 1011 | C | 54 | S     | Ryd( 4S) | 0.00017 | 2.45958  |
| 1012 | C | 54 | S     | Ryd( 5S) | 0.00000 | 20.56164 |
| 1013 | C | 54 | px    | Val( 2p) | 1.18130 | -0.07600 |
| 1014 | C | 54 | px    | Ryd( 3p) | 0.00108 | 0.56392  |
| 1015 | C | 54 | px    | Ryd( 4p) | 0.00020 | 1.50487  |
| 1016 | C | 54 | py    | Val( 2p) | 1.13298 | -0.07561 |
| 1017 | C | 54 | py    | Ryd( 3p) | 0.00042 | 0.52806  |
| 1018 | C | 54 | py    | Ryd( 4p) | 0.00036 | 1.49568  |
| 1019 | C | 54 | pz    | Val( 2p) | 1.17393 | -0.07863 |
| 1020 | C | 54 | pz    | Ryd( 3p) | 0.00068 | 0.56538  |
| 1021 | C | 54 | pz    | Ryd( 4p) | 0.00028 | 1.51709  |
| 1022 | C | 54 | dxy   | Ryd( 3d) | 0.00039 | 2.27768  |
| 1023 | C | 54 | dxz   | Ryd( 3d) | 0.00023 | 2.18490  |
| 1024 | C | 54 | dyz   | Ryd( 3d) | 0.00037 | 2.29302  |
| 1025 | C | 54 | dx2y2 | Ryd( 3d) | 0.00084 | 2.47126  |
| 1026 | C | 54 | dz2   | Ryd( 3d) | 0.00088 | 2.50613  |
| 1027 | C | 55 | S     | Cor( 1S) | 1.99942 | -9.72860 |
| 1028 | C | 55 | S     | Val( 2S) | 1.11695 | -0.27747 |
| 1029 | C | 55 | S     | Ryd( 3S) | 0.00063 | 1.22245  |
| 1030 | C | 55 | S     | Ryd( 4S) | 0.00022 | 2.53328  |
| 1031 | C | 55 | S     | Ryd( 5S) | 0.00000 | 20.70752 |
| 1032 | C | 55 | px    | Val( 2p) | 1.19623 | -0.08482 |
| 1033 | C | 55 | px    | Ryd( 3p) | 0.00093 | 0.73525  |
| 1034 | C | 55 | px    | Ryd( 4p) | 0.00023 | 1.82287  |
| 1035 | C | 55 | py    | Val( 2p) | 1.06498 | -0.08560 |
| 1036 | C | 55 | py    | Ryd( 3p) | 0.00076 | 0.63873  |
| 1037 | C | 55 | py    | Ryd( 4p) | 0.00053 | 1.63620  |
| 1038 | C | 55 | pz    | Val( 2p) | 1.23742 | -0.08491 |
| 1039 | C | 55 | pz    | Ryd( 3p) | 0.00120 | 0.64074  |
| 1040 | C | 55 | pz    | Ryd( 4p) | 0.00033 | 1.56284  |
| 1041 | C | 55 | dxy   | Ryd( 3d) | 0.00067 | 2.42221  |
| 1042 | C | 55 | dxz   | Ryd( 3d) | 0.00063 | 2.43922  |
| 1043 | C | 55 | dyz   | Ryd( 3d) | 0.00034 | 2.15147  |
| 1044 | C | 55 | dx2y2 | Ryd( 3d) | 0.00043 | 2.29698  |
| 1045 | C | 55 | dz2   | Ryd( 3d) | 0.00059 | 2.41849  |
| 1046 | C | 56 | S     | Cor( 1S) | 1.99942 | -9.72106 |
| 1047 | C | 56 | S     | Val( 2S) | 1.11491 | -0.26989 |
| 1048 | C | 56 | S     | Ryd( 3S) | 0.00073 | 1.18856  |
| 1049 | C | 56 | S     | Ryd( 4S) | 0.00023 | 2.48012  |
| 1050 | C | 56 | S     | Ryd( 5S) | 0.00000 | 20.79066 |
| 1051 | C | 56 | px    | Val( 2p) | 1.10122 | -0.07528 |
| 1052 | C | 56 | px    | Ryd( 3p) | 0.00069 | 0.68267  |
| 1053 | C | 56 | px    | Ryd( 4p) | 0.00039 | 1.76757  |
| 1054 | C | 56 | py    | Val( 2p) | 1.24202 | -0.07714 |
| 1055 | C | 56 | py    | Ryd( 3p) | 0.00143 | 0.69604  |
| 1056 | C | 56 | py    | Ryd( 4p) | 0.00039 | 1.51333  |
| 1057 | C | 56 | pz    | Val( 2p) | 1.15616 | -0.08042 |
| 1058 | C | 56 | pz    | Ryd( 3p) | 0.00100 | 0.72291  |
| 1059 | C | 56 | pz    | Ryd( 4p) | 0.00030 | 1.79215  |
| 1060 | C | 56 | dxy   | Ryd( 3d) | 0.00040 | 2.24039  |
| 1061 | C | 56 | dxz   | Ryd( 3d) | 0.00058 | 2.44151  |
| 1062 | C | 56 | dyz   | Ryd( 3d) | 0.00047 | 2.32368  |



|      |   |    |       |          |         |          |
|------|---|----|-------|----------|---------|----------|
| 1063 | C | 56 | dx2y2 | Ryd( 3d) | 0.00073 | 2.46588  |
| 1064 | C | 56 | dz2   | Ryd( 3d) | 0.00047 | 2.29475  |
| 1065 | C | 57 | S     | Cor( 1S) | 1.99943 | -9.71209 |
| 1066 | C | 57 | S     | Val( 2S) | 1.11233 | -0.25878 |
| 1067 | C | 57 | S     | Ryd( 3S) | 0.00068 | 1.27507  |
| 1068 | C | 57 | S     | Ryd( 4S) | 0.00021 | 2.56266  |
| 1069 | C | 57 | S     | Ryd( 5S) | 0.00000 | 20.61201 |
| 1070 | C | 57 | px    | Val( 2p) | 1.16213 | -0.07069 |
| 1071 | C | 57 | px    | Ryd( 3p) | 0.00115 | 0.69975  |
| 1072 | C | 57 | px    | Ryd( 4p) | 0.00041 | 1.70442  |
| 1073 | C | 57 | py    | Val( 2p) | 1.16346 | -0.06822 |
| 1074 | C | 57 | py    | Ryd( 3p) | 0.00117 | 0.60679  |
| 1075 | C | 57 | py    | Ryd( 4p) | 0.00030 | 1.59624  |
| 1076 | C | 57 | pz    | Val( 2p) | 1.17612 | -0.06734 |
| 1077 | C | 57 | pz    | Ryd( 3p) | 0.00126 | 0.58198  |
| 1078 | C | 57 | pz    | Ryd( 4p) | 0.00031 | 1.64538  |
| 1079 | C | 57 | dxxy  | Ryd( 3d) | 0.00081 | 2.53934  |
| 1080 | C | 57 | dxz   | Ryd( 3d) | 0.00080 | 2.51715  |
| 1081 | C | 57 | dyyz  | Ryd( 3d) | 0.00073 | 2.54327  |
| 1082 | C | 57 | dx2y2 | Ryd( 3d) | 0.00015 | 2.09349  |
| 1083 | C | 57 | dz2   | Ryd( 3d) | 0.00016 | 2.10173  |
| 1084 | C | 58 | S     | Cor( 1S) | 1.99942 | -9.72722 |
| 1085 | C | 58 | S     | Val( 2S) | 1.11473 | -0.27525 |
| 1086 | C | 58 | S     | Ryd( 3S) | 0.00065 | 1.19038  |
| 1087 | C | 58 | S     | Ryd( 4S) | 0.00019 | 2.49299  |
| 1088 | C | 58 | S     | Ryd( 5S) | 0.00000 | 20.69911 |
| 1089 | C | 58 | px    | Val( 2p) | 1.22345 | -0.08281 |
| 1090 | C | 58 | px    | Ryd( 3p) | 0.00122 | 0.66023  |
| 1091 | C | 58 | px    | Ryd( 4p) | 0.00031 | 1.49149  |
| 1092 | C | 58 | py    | Val( 2p) | 1.16202 | -0.08269 |
| 1093 | C | 58 | py    | Ryd( 3p) | 0.00076 | 0.63623  |
| 1094 | C | 58 | py    | Ryd( 4p) | 0.00029 | 1.73070  |
| 1095 | C | 58 | pz    | Val( 2p) | 1.11292 | -0.08497 |
| 1096 | C | 58 | pz    | Ryd( 3p) | 0.00086 | 0.62465  |
| 1097 | C | 58 | pz    | Ryd( 4p) | 0.00044 | 1.66909  |
| 1098 | C | 58 | dxxy  | Ryd( 3d) | 0.00043 | 2.29344  |
| 1099 | C | 58 | dxz   | Ryd( 3d) | 0.00028 | 2.16527  |
| 1100 | C | 58 | dyyz  | Ryd( 3d) | 0.00054 | 2.41180  |
| 1101 | C | 58 | dx2y2 | Ryd( 3d) | 0.00071 | 2.41813  |
| 1102 | C | 58 | dz2   | Ryd( 3d) | 0.00075 | 2.42434  |
| 1103 | C | 59 | S     | Cor( 1S) | 1.99942 | -9.72792 |
| 1104 | C | 59 | S     | Val( 2S) | 1.11477 | -0.27553 |
| 1105 | C | 59 | S     | Ryd( 3S) | 0.00061 | 1.11311  |
| 1106 | C | 59 | S     | Ryd( 4S) | 0.00016 | 2.76377  |
| 1107 | C | 59 | S     | Ryd( 5S) | 0.00000 | 20.47776 |
| 1108 | C | 59 | px    | Val( 2p) | 1.21304 | -0.08398 |
| 1109 | C | 59 | px    | Ryd( 3p) | 0.00112 | 0.71435  |
| 1110 | C | 59 | px    | Ryd( 4p) | 0.00016 | 1.73909  |
| 1111 | C | 59 | py    | Val( 2p) | 1.16511 | -0.08633 |
| 1112 | C | 59 | py    | Ryd( 3p) | 0.00107 | 0.59753  |
| 1113 | C | 59 | py    | Ryd( 4p) | 0.00029 | 1.58484  |
| 1114 | C | 59 | pz    | Val( 2p) | 1.12106 | -0.08355 |
| 1115 | C | 59 | pz    | Ryd( 3p) | 0.00064 | 0.52734  |
| 1116 | C | 59 | pz    | Ryd( 4p) | 0.00042 | 1.60308  |
| 1117 | C | 59 | dxxy  | Ryd( 3d) | 0.00069 | 2.43437  |
| 1118 | C | 59 | dxz   | Ryd( 3d) | 0.00059 | 2.38389  |
| 1119 | C | 59 | dyyz  | Ryd( 3d) | 0.00068 | 2.48368  |
| 1120 | C | 59 | dx2y2 | Ryd( 3d) | 0.00026 | 2.19924  |
| 1121 | C | 59 | dz2   | Ryd( 3d) | 0.00041 | 2.21248  |
| 1122 | C | 60 | S     | Cor( 1S) | 1.99943 | -9.70847 |
| 1123 | C | 60 | S     | Val( 2S) | 1.11166 | -0.25536 |
| 1124 | C | 60 | S     | Ryd( 3S) | 0.00075 | 1.31412  |
| 1125 | C | 60 | S     | Ryd( 4S) | 0.00023 | 2.60024  |
| 1126 | C | 60 | S     | Ryd( 5S) | 0.00000 | 20.71304 |
| 1127 | C | 60 | px    | Val( 2p) | 1.06373 | -0.06394 |
| 1128 | C | 60 | px    | Ryd( 3p) | 0.00065 | 0.67457  |
| 1129 | C | 60 | px    | Ryd( 4p) | 0.00056 | 1.55304  |

|      |   |    |       |          |         |          |
|------|---|----|-------|----------|---------|----------|
| 1130 | C | 60 | py    | Val( 2p) | 1.21219 | -0.06346 |
| 1131 | C | 60 | py    | Ryd( 3p) | 0.00145 | 0.67952  |
| 1132 | C | 60 | py    | Ryd( 4p) | 0.00028 | 1.65929  |
| 1133 | C | 60 | pz    | Val( 2p) | 1.22631 | -0.06766 |
| 1134 | C | 60 | pz    | Ryd( 3p) | 0.00144 | 0.67975  |
| 1135 | C | 60 | pz    | Ryd( 4p) | 0.00035 | 1.71386  |
| 1136 | C | 60 | dxxy  | Ryd( 3d) | 0.00072 | 2.38262  |
| 1137 | C | 60 | dxz   | Ryd( 3d) | 0.00044 | 2.23568  |
| 1138 | C | 60 | dyz   | Ryd( 3d) | 0.00037 | 2.28519  |
| 1139 | C | 60 | dx2y2 | Ryd( 3d) | 0.00053 | 2.42118  |
| 1140 | C | 60 | dz2   | Ryd( 3d) | 0.00068 | 2.49798  |
| 1141 | C | 61 | S     | Cor( 1S) | 1.99942 | -9.72639 |
| 1142 | C | 61 | S     | Val( 2S) | 1.11571 | -0.27476 |
| 1143 | C | 61 | S     | Ryd( 3S) | 0.00065 | 1.24055  |
| 1144 | C | 61 | S     | Ryd( 4S) | 0.00019 | 2.54612  |
| 1145 | C | 61 | S     | Ryd( 5S) | 0.00000 | 20.70304 |
| 1146 | C | 61 | px    | Val( 2p) | 1.20165 | -0.08292 |
| 1147 | C | 61 | px    | Ryd( 3p) | 0.00121 | 0.70571  |
| 1148 | C | 61 | px    | Ryd( 4p) | 0.00031 | 1.50078  |
| 1149 | C | 61 | py    | Val( 2p) | 1.08343 | -0.08131 |
| 1150 | C | 61 | py    | Ryd( 3p) | 0.00060 | 0.57930  |
| 1151 | C | 61 | py    | Ryd( 4p) | 0.00052 | 1.66701  |
| 1152 | C | 61 | pz    | Val( 2p) | 1.21305 | -0.08355 |
| 1153 | C | 61 | pz    | Ryd( 3p) | 0.00108 | 0.70110  |
| 1154 | C | 61 | pz    | Ryd( 4p) | 0.00022 | 1.77352  |
| 1155 | C | 61 | dxxy  | Ryd( 3d) | 0.00054 | 2.35197  |
| 1156 | C | 61 | dxz   | Ryd( 3d) | 0.00028 | 2.20968  |
| 1157 | C | 61 | dyz   | Ryd( 3d) | 0.00047 | 2.29388  |
| 1158 | C | 61 | dx2y2 | Ryd( 3d) | 0.00072 | 2.39614  |
| 1159 | C | 61 | dz2   | Ryd( 3d) | 0.00065 | 2.47756  |
| 1160 | C | 62 | S     | Cor( 1S) | 1.99942 | -9.71143 |
| 1161 | C | 62 | S     | Val( 2S) | 1.11380 | -0.25999 |
| 1162 | C | 62 | S     | Ryd( 3S) | 0.00078 | 1.19177  |
| 1163 | C | 62 | S     | Ryd( 4S) | 0.00019 | 2.53795  |
| 1164 | C | 62 | S     | Ryd( 5S) | 0.00000 | 20.67893 |
| 1165 | C | 62 | px    | Val( 2p) | 1.19679 | -0.07298 |
| 1166 | C | 62 | px    | Ryd( 3p) | 0.00116 | 0.66994  |
| 1167 | C | 62 | px    | Ryd( 4p) | 0.00028 | 1.68543  |
| 1168 | C | 62 | py    | Val( 2p) | 1.24406 | -0.07072 |
| 1169 | C | 62 | py    | Ryd( 3p) | 0.00157 | 0.62826  |
| 1170 | C | 62 | py    | Ryd( 4p) | 0.00009 | 1.59873  |
| 1171 | C | 62 | pz    | Val( 2p) | 1.07167 | -0.06793 |
| 1172 | C | 62 | pz    | Ryd( 3p) | 0.00050 | 0.55660  |
| 1173 | C | 62 | pz    | Ryd( 4p) | 0.00065 | 1.56910  |
| 1174 | C | 62 | dxxy  | Ryd( 3d) | 0.00078 | 2.52987  |
| 1175 | C | 62 | dxz   | Ryd( 3d) | 0.00080 | 2.48686  |
| 1176 | C | 62 | dyz   | Ryd( 3d) | 0.00024 | 2.12734  |
| 1177 | C | 62 | dx2y2 | Ryd( 3d) | 0.00020 | 2.19994  |
| 1178 | C | 62 | dz2   | Ryd( 3d) | 0.00067 | 2.43543  |
| 1179 | H | 63 | S     | Val( 1S) | 0.75545 | -0.00006 |
| 1180 | H | 63 | S     | Ryd( 3S) | 0.00043 | 1.79090  |
| 1181 | H | 63 | S     | Ryd( 2S) | 0.00009 | 0.80131  |
| 1182 | H | 63 | px    | Ryd( 2p) | 0.00055 | 2.72441  |
| 1183 | H | 63 | py    | Ryd( 2p) | 0.00020 | 1.83780  |
| 1184 | H | 63 | pz    | Ryd( 2p) | 0.00020 | 1.83821  |
| 1185 | H | 64 | S     | Val( 1S) | 0.75718 | -0.00225 |
| 1186 | H | 64 | S     | Ryd( 3S) | 0.00043 | 1.76802  |
| 1187 | H | 64 | S     | Ryd( 2S) | 0.00009 | 0.77898  |
| 1188 | H | 64 | px    | Ryd( 2p) | 0.00013 | 1.96283  |
| 1189 | H | 64 | py    | Ryd( 2p) | 0.00042 | 2.21533  |
| 1190 | H | 64 | pz    | Ryd( 2p) | 0.00041 | 2.20575  |
| 1191 | H | 65 | S     | Val( 1S) | 0.78418 | 0.02546  |
| 1192 | H | 65 | S     | Ryd( 2S) | 0.00119 | 0.60573  |
| 1193 | H | 65 | S     | Ryd( 3S) | 0.00025 | 2.21725  |
| 1194 | H | 65 | px    | Ryd( 2p) | 0.00030 | 1.92371  |
| 1195 | H | 65 | py    | Ryd( 2p) | 0.00041 | 2.43311  |

|      |   |    |    |          |         |         |
|------|---|----|----|----------|---------|---------|
| 1196 | H | 65 | pz | Ryd( 2p) | 0.00016 | 2.08711 |
| 1197 | H | 66 | S  | Val( 1S) | 0.78213 | 0.02715 |
| 1198 | H | 66 | S  | Ryd( 3S) | 0.00029 | 1.21615 |
| 1199 | H | 66 | S  | Ryd( 2S) | 0.00018 | 1.14102 |
| 1200 | H | 66 | px | Ryd( 2p) | 0.00026 | 1.89543 |
| 1201 | H | 66 | py | Ryd( 2p) | 0.00025 | 2.15621 |
| 1202 | H | 66 | pz | Ryd( 2p) | 0.00028 | 2.35279 |
| 1203 | H | 67 | S  | Val( 1S) | 0.77872 | 0.03448 |
| 1204 | H | 67 | S  | Ryd( 2S) | 0.00102 | 0.60382 |
| 1205 | H | 67 | S  | Ryd( 3S) | 0.00026 | 2.22154 |
| 1206 | H | 67 | px | Ryd( 2p) | 0.00023 | 1.77975 |
| 1207 | H | 67 | py | Ryd( 2p) | 0.00019 | 1.97766 |
| 1208 | H | 67 | pz | Ryd( 2p) | 0.00046 | 2.70912 |
| 1209 | H | 68 | S  | Val( 1S) | 0.77961 | 0.02201 |
| 1210 | H | 68 | S  | Ryd( 2S) | 0.00134 | 0.60517 |
| 1211 | H | 68 | S  | Ryd( 3S) | 0.00028 | 2.24521 |
| 1212 | H | 68 | px | Ryd( 2p) | 0.00033 | 2.25017 |
| 1213 | H | 68 | py | Ryd( 2p) | 0.00036 | 2.19085 |
| 1214 | H | 68 | pz | Ryd( 2p) | 0.00018 | 1.99399 |
| 1215 | H | 69 | S  | Val( 1S) | 0.78001 | 0.01924 |
| 1216 | H | 69 | S  | Ryd( 2S) | 0.00031 | 1.13532 |
| 1217 | H | 69 | S  | Ryd( 3S) | 0.00019 | 1.20200 |
| 1218 | H | 69 | px | Ryd( 2p) | 0.00035 | 2.32887 |
| 1219 | H | 69 | py | Ryd( 2p) | 0.00018 | 1.84901 |
| 1220 | H | 69 | pz | Ryd( 2p) | 0.00027 | 2.20996 |
| 1221 | H | 70 | S  | Val( 1S) | 0.78187 | 0.01871 |
| 1222 | H | 70 | S  | Ryd( 2S) | 0.00113 | 0.59534 |
| 1223 | H | 70 | S  | Ryd( 3S) | 0.00025 | 2.20670 |
| 1224 | H | 70 | px | Ryd( 2p) | 0.00019 | 1.92956 |
| 1225 | H | 70 | py | Ryd( 2p) | 0.00026 | 1.98732 |
| 1226 | H | 70 | pz | Ryd( 2p) | 0.00041 | 2.49692 |
| 1227 | H | 71 | S  | Val( 1S) | 0.75987 | 0.01397 |
| 1228 | H | 71 | S  | Ryd( 3S) | 0.00043 | 1.79046 |
| 1229 | H | 71 | S  | Ryd( 2S) | 0.00010 | 0.81350 |
| 1230 | H | 71 | px | Ryd( 2p) | 0.00051 | 2.56812 |
| 1231 | H | 71 | py | Ryd( 2p) | 0.00013 | 1.98132 |
| 1232 | H | 71 | pz | Ryd( 2p) | 0.00037 | 1.90200 |
| 1233 | H | 72 | S  | Val( 1S) | 0.76024 | 0.01383 |
| 1234 | H | 72 | S  | Ryd( 3S) | 0.00044 | 1.76355 |
| 1235 | H | 72 | S  | Ryd( 2S) | 0.00010 | 0.82789 |
| 1236 | H | 72 | px | Ryd( 2p) | 0.00018 | 2.00162 |
| 1237 | H | 72 | py | Ryd( 2p) | 0.00054 | 2.71000 |
| 1238 | H | 72 | pz | Ryd( 2p) | 0.00028 | 1.74205 |
| 1239 | H | 73 | S  | Val( 1S) | 0.78537 | 0.02432 |
| 1240 | H | 73 | S  | Ryd( 2S) | 0.00130 | 0.60137 |
| 1241 | H | 73 | S  | Ryd( 3S) | 0.00025 | 2.21321 |
| 1242 | H | 73 | px | Ryd( 2p) | 0.00034 | 2.05381 |
| 1243 | H | 73 | py | Ryd( 2p) | 0.00023 | 2.14663 |
| 1244 | H | 73 | pz | Ryd( 2p) | 0.00029 | 2.23060 |
| 1245 | H | 74 | S  | Val( 1S) | 0.78298 | 0.02523 |
| 1246 | H | 74 | S  | Ryd( 2S) | 0.00032 | 1.16073 |
| 1247 | H | 74 | S  | Ryd( 3S) | 0.00019 | 1.18684 |
| 1248 | H | 74 | px | Ryd( 2p) | 0.00023 | 1.86659 |
| 1249 | H | 74 | py | Ryd( 2p) | 0.00040 | 2.54852 |
| 1250 | H | 74 | pz | Ryd( 2p) | 0.00016 | 1.99016 |
| 1251 | H | 75 | S  | Val( 1S) | 0.77911 | 0.03410 |
| 1252 | H | 75 | S  | Ryd( 2S) | 0.00112 | 0.59965 |
| 1253 | H | 75 | S  | Ryd( 3S) | 0.00027 | 2.21782 |
| 1254 | H | 75 | px | Ryd( 2p) | 0.00025 | 1.84584 |
| 1255 | H | 75 | py | Ryd( 2p) | 0.00022 | 2.11747 |
| 1256 | H | 75 | pz | Ryd( 2p) | 0.00040 | 2.49339 |

|      |   |    |    |          |         |         |
|------|---|----|----|----------|---------|---------|
| 1257 | H | 76 | S  | Val( 1S) | 0.77901 | 0.03433 |
| 1258 | H | 76 | S  | Ryd( 2S) | 0.00127 | 0.61461 |
| 1259 | H | 76 | S  | Ryd( 3S) | 0.00028 | 2.24235 |
| 1260 | H | 76 | px | Ryd( 2p) | 0.00039 | 2.35712 |
| 1261 | H | 76 | py | Ryd( 2p) | 0.00028 | 1.96936 |
| 1262 | H | 76 | pz | Ryd( 2p) | 0.00022 | 2.14611 |
| 1263 | H | 77 | S  | Val( 1S) | 0.78351 | 0.02500 |
| 1264 | H | 77 | S  | Ryd( 2S) | 0.00031 | 1.11544 |
| 1265 | H | 77 | S  | Ryd( 3S) | 0.00019 | 1.23573 |
| 1266 | H | 77 | px | Ryd( 2p) | 0.00027 | 2.14814 |
| 1267 | H | 77 | py | Ryd( 2p) | 0.00030 | 2.04146 |
| 1268 | H | 77 | pz | Ryd( 2p) | 0.00022 | 2.20737 |
| 1269 | H | 78 | S  | Val( 1S) | 0.78550 | 0.02394 |
| 1270 | H | 78 | S  | Ryd( 2S) | 0.00124 | 0.60222 |
| 1271 | H | 78 | S  | Ryd( 3S) | 0.00024 | 2.21033 |
| 1272 | H | 78 | px | Ryd( 2p) | 0.00019 | 1.94210 |
| 1273 | H | 78 | py | Ryd( 2p) | 0.00022 | 1.82367 |
| 1274 | H | 78 | pz | Ryd( 2p) | 0.00045 | 2.66211 |
| 1275 | H | 79 | S  | Val( 1S) | 0.77152 | 0.02881 |
| 1276 | H | 79 | S  | Ryd( 2S) | 0.00166 | 0.87202 |
| 1277 | H | 79 | S  | Ryd( 3S) | 0.00016 | 2.52594 |
| 1278 | H | 79 | px | Ryd( 2p) | 0.00024 | 2.09640 |
| 1279 | H | 79 | py | Ryd( 2p) | 0.00031 | 2.59878 |
| 1280 | H | 79 | pz | Ryd( 2p) | 0.00021 | 2.02649 |
| 1281 | H | 80 | S  | Val( 1S) | 0.73341 | 0.07029 |
| 1282 | H | 80 | S  | Ryd( 2S) | 0.00353 | 0.77273 |
| 1283 | H | 80 | S  | Ryd( 3S) | 0.00024 | 2.54707 |
| 1284 | H | 80 | px | Ryd( 2p) | 0.00033 | 2.32053 |
| 1285 | H | 80 | py | Ryd( 2p) | 0.00020 | 2.26226 |
| 1286 | H | 80 | pz | Ryd( 2p) | 0.00019 | 2.19215 |
| 1287 | H | 81 | S  | Val( 1S) | 0.77214 | 0.02743 |
| 1288 | H | 81 | S  | Ryd( 2S) | 0.00176 | 0.83518 |
| 1289 | H | 81 | S  | Ryd( 3S) | 0.00018 | 2.47282 |
| 1290 | H | 81 | px | Ryd( 2p) | 0.00023 | 2.19652 |
| 1291 | H | 81 | py | Ryd( 2p) | 0.00023 | 2.15904 |
| 1292 | H | 81 | pz | Ryd( 2p) | 0.00035 | 2.34035 |
| 1293 | H | 82 | S  | Val( 1S) | 0.74296 | 0.06326 |
| 1294 | H | 82 | S  | Ryd( 2S) | 0.00299 | 0.74796 |
| 1295 | H | 82 | S  | Ryd( 3S) | 0.00022 | 2.49807 |
| 1296 | H | 82 | px | Ryd( 2p) | 0.00017 | 2.09424 |
| 1297 | H | 82 | py | Ryd( 2p) | 0.00038 | 2.61831 |
| 1298 | H | 82 | pz | Ryd( 2p) | 0.00017 | 2.07432 |
| 1299 | H | 83 | S  | Val( 1S) | 0.78007 | 0.01976 |
| 1300 | H | 83 | S  | Ryd( 2S) | 0.00171 | 0.80962 |
| 1301 | H | 83 | S  | Ryd( 3S) | 0.00015 | 2.48728 |
| 1302 | H | 83 | px | Ryd( 2p) | 0.00025 | 2.11268 |
| 1303 | H | 83 | py | Ryd( 2p) | 0.00030 | 2.30492 |
| 1304 | H | 83 | pz | Ryd( 2p) | 0.00023 | 2.29157 |
| 1305 | H | 84 | S  | Val( 1S) | 0.76670 | 0.03664 |
| 1306 | H | 84 | S  | Ryd( 2S) | 0.00174 | 0.71666 |
| 1307 | H | 84 | S  | Ryd( 3S) | 0.00019 | 2.48323 |
| 1308 | H | 84 | px | Ryd( 2p) | 0.00031 | 2.41738 |
| 1309 | H | 84 | py | Ryd( 2p) | 0.00015 | 2.01017 |
| 1310 | H | 84 | pz | Ryd( 2p) | 0.00024 | 2.28875 |
| 1311 | H | 85 | S  | Val( 1S) | 0.77807 | 0.01579 |
| 1312 | H | 85 | S  | Ryd( 2S) | 0.00180 | 0.77717 |
| 1313 | H | 85 | S  | Ryd( 3S) | 0.00017 | 2.42371 |
| 1314 | H | 85 | px | Ryd( 2p) | 0.00029 | 2.48581 |
| 1315 | H | 85 | py | Ryd( 2p) | 0.00019 | 1.94487 |
| 1316 | H | 85 | pz | Ryd( 2p) | 0.00031 | 2.25159 |

|      |   |    |    |          |         |         |
|------|---|----|----|----------|---------|---------|
| 1317 | H | 86 | S  | Val( 1S) | 0.77367 | 0.02410 |
| 1318 | H | 86 | S  | Ryd( 2S) | 0.00158 | 0.73901 |
| 1319 | H | 86 | S  | Ryd( 3S) | 0.00016 | 2.38593 |
| 1320 | H | 86 | px | Ryd( 2p) | 0.00029 | 2.41012 |
| 1321 | H | 86 | py | Ryd( 2p) | 0.00024 | 2.04421 |
| 1322 | H | 86 | pz | Ryd( 2p) | 0.00023 | 2.20233 |
| 1323 | H | 87 | S  | Val( 1S) | 0.78542 | 0.03308 |
| 1324 | H | 87 | S  | Ryd( 2S) | 0.00059 | 0.63094 |
| 1325 | H | 87 | S  | Ryd( 3S) | 0.00013 | 1.84773 |
| 1326 | H | 87 | px | Ryd( 2p) | 0.00022 | 2.11263 |
| 1327 | H | 87 | py | Ryd( 2p) | 0.00030 | 2.38837 |
| 1328 | H | 87 | pz | Ryd( 2p) | 0.00013 | 1.86769 |
| 1329 | H | 88 | S  | Val( 1S) | 0.80078 | 0.02583 |
| 1330 | H | 88 | S  | Ryd( 2S) | 0.00068 | 0.91421 |
| 1331 | H | 88 | S  | Ryd( 3S) | 0.00018 | 1.57466 |
| 1332 | H | 88 | px | Ryd( 2p) | 0.00027 | 2.20338 |
| 1333 | H | 88 | py | Ryd( 2p) | 0.00016 | 1.83060 |
| 1334 | H | 88 | pz | Ryd( 2p) | 0.00024 | 2.35812 |
| 1335 | H | 89 | S  | Val( 1S) | 0.73700 | 0.07509 |
| 1336 | H | 89 | S  | Ryd( 2S) | 0.00088 | 1.12983 |
| 1337 | H | 89 | S  | Ryd( 3S) | 0.00017 | 1.82789 |
| 1338 | H | 89 | px | Ryd( 2p) | 0.00022 | 2.18818 |
| 1339 | H | 89 | py | Ryd( 2p) | 0.00031 | 2.38465 |
| 1340 | H | 89 | pz | Ryd( 2p) | 0.00014 | 1.88266 |
| 1341 | H | 90 | S  | Val( 1S) | 0.78364 | 0.02266 |
| 1342 | H | 90 | S  | Ryd( 2S) | 0.00060 | 0.67675 |
| 1343 | H | 90 | S  | Ryd( 3S) | 0.00013 | 1.74839 |
| 1344 | H | 90 | px | Ryd( 2p) | 0.00020 | 1.97931 |
| 1345 | H | 90 | py | Ryd( 2p) | 0.00025 | 2.47082 |
| 1346 | H | 90 | pz | Ryd( 2p) | 0.00017 | 1.89307 |
| 1347 | H | 91 | S  | Val( 1S) | 0.79026 | 0.02240 |
| 1348 | H | 91 | S  | Ryd( 2S) | 0.00059 | 1.04313 |
| 1349 | H | 91 | S  | Ryd( 3S) | 0.00011 | 1.56359 |
| 1350 | H | 91 | px | Ryd( 2p) | 0.00015 | 1.93978 |
| 1351 | H | 91 | py | Ryd( 2p) | 0.00012 | 1.89231 |
| 1352 | H | 91 | pz | Ryd( 2p) | 0.00035 | 2.53264 |
| 1353 | H | 92 | S  | Val( 1S) | 0.78793 | 0.02170 |
| 1354 | H | 92 | S  | Ryd( 2S) | 0.00085 | 0.78362 |
| 1355 | H | 92 | S  | Ryd( 3S) | 0.00012 | 1.64852 |
| 1356 | H | 92 | px | Ryd( 2p) | 0.00026 | 2.36325 |
| 1357 | H | 92 | py | Ryd( 2p) | 0.00013 | 1.84886 |
| 1358 | H | 92 | pz | Ryd( 2p) | 0.00025 | 2.16247 |
| 1359 | H | 93 | S  | Val( 1S) | 0.78404 | 0.01628 |
| 1360 | H | 93 | S  | Ryd( 2S) | 0.00058 | 0.63777 |
| 1361 | H | 93 | S  | Ryd( 3S) | 0.00013 | 1.74520 |
| 1362 | H | 93 | px | Ryd( 2p) | 0.00011 | 1.80572 |
| 1363 | H | 93 | py | Ryd( 2p) | 0.00015 | 1.85179 |
| 1364 | H | 93 | pz | Ryd( 2p) | 0.00037 | 2.65761 |
| 1365 | H | 94 | S  | Val( 1S) | 0.78819 | 0.01517 |
| 1366 | H | 94 | S  | Ryd( 2S) | 0.00073 | 0.91439 |
| 1367 | H | 94 | S  | Ryd( 3S) | 0.00015 | 1.54063 |
| 1368 | H | 94 | px | Ryd( 2p) | 0.00017 | 2.11367 |
| 1369 | H | 94 | py | Ryd( 2p) | 0.00027 | 2.20582 |
| 1370 | H | 94 | pz | Ryd( 2p) | 0.00022 | 1.99877 |
| 1371 | H | 95 | S  | Val( 1S) | 0.78467 | 0.01728 |
| 1372 | H | 95 | S  | Ryd( 2S) | 0.00050 | 0.70989 |
| 1373 | H | 95 | S  | Ryd( 3S) | 0.00012 | 1.78401 |
| 1374 | H | 95 | px | Ryd( 2p) | 0.00016 | 1.99726 |
| 1375 | H | 95 | py | Ryd( 2p) | 0.00031 | 2.48400 |
| 1376 | H | 95 | pz | Ryd( 2p) | 0.00014 | 1.82116 |
| 1377 | H | 96 | S  | Val( 1S) | 0.78602 | 0.02163 |

|      |   |     |    |          |         |         |
|------|---|-----|----|----------|---------|---------|
| 1378 | H | 96  | S  | Ryd( 2S) | 0.00074 | 0.58586 |
| 1379 | H | 96  | S  | Ryd( 3S) | 0.00015 | 1.89840 |
| 1380 | H | 96  | px | Ryd( 2p) | 0.00016 | 1.83523 |
| 1381 | H | 96  | py | Ryd( 2p) | 0.00013 | 1.90370 |
| 1382 | H | 96  | pz | Ryd( 2p) | 0.00037 | 2.64065 |
| 1383 | H | 97  | S  | Val( 1S) | 0.75954 | 0.04748 |
| 1384 | H | 97  | S  | Ryd( 2S) | 0.00088 | 0.87543 |
| 1385 | H | 97  | S  | Ryd( 3S) | 0.00025 | 2.46614 |
| 1386 | H | 97  | px | Ryd( 2p) | 0.00032 | 2.66180 |
| 1387 | H | 97  | py | Ryd( 2p) | 0.00011 | 1.86284 |
| 1388 | H | 97  | pz | Ryd( 2p) | 0.00015 | 1.92667 |
| 1389 | H | 98  | S  | Val( 1S) | 0.79127 | 0.02011 |
| 1390 | H | 98  | S  | Ryd( 2S) | 0.00069 | 0.97720 |
| 1391 | H | 98  | S  | Ryd( 3S) | 0.00017 | 1.53464 |
| 1392 | H | 98  | px | Ryd( 2p) | 0.00021 | 2.00260 |
| 1393 | H | 98  | py | Ryd( 2p) | 0.00024 | 2.34858 |
| 1394 | H | 98  | pz | Ryd( 2p) | 0.00022 | 2.04004 |
| 1395 | H | 99  | S  | Val( 1S) | 0.78131 | 0.01844 |
| 1396 | H | 99  | S  | Ryd( 2S) | 0.00057 | 0.64335 |
| 1397 | H | 99  | S  | Ryd( 3S) | 0.00013 | 1.74132 |
| 1398 | H | 99  | px | Ryd( 2p) | 0.00015 | 1.84027 |
| 1399 | H | 99  | py | Ryd( 2p) | 0.00014 | 2.04721 |
| 1400 | H | 99  | pz | Ryd( 2p) | 0.00034 | 2.43069 |
| 1401 | H | 100 | S  | Val( 1S) | 0.78971 | 0.01457 |
| 1402 | H | 100 | S  | Ryd( 2S) | 0.00076 | 0.86018 |
| 1403 | H | 100 | S  | Ryd( 3S) | 0.00014 | 1.59167 |
| 1404 | H | 100 | px | Ryd( 2p) | 0.00030 | 2.27941 |
| 1405 | H | 100 | py | Ryd( 2p) | 0.00015 | 2.03538 |
| 1406 | H | 100 | pz | Ryd( 2p) | 0.00021 | 2.00625 |
| 1407 | H | 101 | S  | Val( 1S) | 0.78575 | 0.01727 |
| 1408 | H | 101 | S  | Ryd( 2S) | 0.00053 | 0.70800 |
| 1409 | H | 101 | S  | Ryd( 3S) | 0.00012 | 1.80274 |
| 1410 | H | 101 | px | Ryd( 2p) | 0.00029 | 2.41507 |
| 1411 | H | 101 | py | Ryd( 2p) | 0.00011 | 1.83527 |
| 1412 | H | 101 | pz | Ryd( 2p) | 0.00021 | 2.05149 |
| 1413 | H | 102 | S  | Val( 1S) | 0.78209 | 0.02805 |
| 1414 | H | 102 | S  | Ryd( 2S) | 0.00056 | 0.64777 |
| 1415 | H | 102 | S  | Ryd( 3S) | 0.00015 | 1.82625 |
| 1416 | H | 102 | px | Ryd( 2p) | 0.00016 | 1.86124 |
| 1417 | H | 102 | py | Ryd( 2p) | 0.00020 | 2.03557 |
| 1418 | H | 102 | pz | Ryd( 2p) | 0.00031 | 2.52869 |
| 1419 | H | 103 | S  | Val( 1S) | 0.75294 | 0.05728 |
| 1420 | H | 103 | S  | Ryd( 2S) | 0.00069 | 0.94945 |
| 1421 | H | 103 | S  | Ryd( 3S) | 0.00021 | 2.55374 |
| 1422 | H | 103 | px | Ryd( 2p) | 0.00012 | 1.90447 |
| 1423 | H | 103 | py | Ryd( 2p) | 0.00034 | 2.66727 |
| 1424 | H | 103 | pz | Ryd( 2p) | 0.00012 | 1.90911 |
| 1425 | H | 104 | S  | Val( 1S) | 0.79353 | 0.02302 |
| 1426 | H | 104 | S  | Ryd( 2S) | 0.00073 | 0.90811 |
| 1427 | H | 104 | S  | Ryd( 3S) | 0.00019 | 1.69129 |
| 1428 | H | 104 | px | Ryd( 2p) | 0.00030 | 2.44087 |
| 1429 | H | 104 | py | Ryd( 2p) | 0.00018 | 1.97203 |
| 1430 | H | 104 | pz | Ryd( 2p) | 0.00020 | 1.99216 |
| 1431 | H | 105 | S  | Val( 1S) | 0.78132 | 0.01442 |
| 1432 | H | 105 | S  | Ryd( 2S) | 0.00054 | 0.63731 |
| 1433 | H | 105 | S  | Ryd( 3S) | 0.00013 | 1.73549 |
| 1434 | H | 105 | px | Ryd( 2p) | 0.00027 | 2.29258 |
| 1435 | H | 105 | py | Ryd( 2p) | 0.00025 | 2.13967 |
| 1436 | H | 105 | pz | Ryd( 2p) | 0.00011 | 1.85447 |
| 1437 | H | 106 | S  | Val( 1S) | 0.78269 | 0.01512 |
| 1438 | H | 106 | S  | Ryd( 2S) | 0.00049 | 0.63519 |

|      |   |     |    |          |         |         |
|------|---|-----|----|----------|---------|---------|
| 1439 | H | 106 | S  | Ryd( 3S) | 0.00013 | 1.80506 |
| 1440 | H | 106 | px | Ryd( 2p) | 0.00017 | 1.94433 |
| 1441 | H | 106 | py | Ryd( 2p) | 0.00033 | 2.52444 |
| 1442 | H | 106 | pz | Ryd( 2p) | 0.00011 | 1.81555 |
| 1443 | H | 107 | S  | Val( 1S) | 0.79026 | 0.01060 |
| 1444 | H | 107 | S  | Ryd( 2S) | 0.00071 | 0.93365 |
| 1445 | H | 107 | S  | Ryd( 3S) | 0.00016 | 1.52577 |
| 1446 | H | 107 | px | Ryd( 2p) | 0.00028 | 2.21165 |
| 1447 | H | 107 | py | Ryd( 2p) | 0.00015 | 1.80850 |
| 1448 | H | 107 | pz | Ryd( 2p) | 0.00023 | 2.25700 |
| 1449 | H | 108 | S  | Val( 1S) | 0.78460 | 0.02002 |
| 1450 | H | 108 | S  | Ryd( 2S) | 0.00073 | 0.60248 |
| 1451 | H | 108 | S  | Ryd( 3S) | 0.00015 | 1.89092 |
| 1452 | H | 108 | px | Ryd( 2p) | 0.00028 | 2.23927 |
| 1453 | H | 108 | py | Ryd( 2p) | 0.00022 | 2.24783 |
| 1454 | H | 108 | pz | Ryd( 2p) | 0.00016 | 1.88556 |
| 1455 | H | 109 | S  | Val( 1S) | 0.79003 | 0.01860 |
| 1456 | H | 109 | S  | Ryd( 2S) | 0.00085 | 0.81596 |
| 1457 | H | 109 | S  | Ryd( 3S) | 0.00018 | 1.77591 |
| 1458 | H | 109 | px | Ryd( 2p) | 0.00030 | 2.32844 |
| 1459 | H | 109 | py | Ryd( 2p) | 0.00013 | 1.88698 |
| 1460 | H | 109 | pz | Ryd( 2p) | 0.00024 | 2.18477 |
| 1461 | H | 110 | S  | Val( 1S) | 0.75556 | 0.04759 |
| 1462 | H | 110 | S  | Ryd( 2S) | 0.00064 | 0.88796 |
| 1463 | H | 110 | S  | Ryd( 3S) | 0.00022 | 2.52048 |
| 1464 | H | 110 | px | Ryd( 2p) | 0.00018 | 1.95588 |
| 1465 | H | 110 | py | Ryd( 2p) | 0.00010 | 1.93583 |
| 1466 | H | 110 | pz | Ryd( 2p) | 0.00032 | 2.58610 |
| 1467 | H | 111 | S  | Val( 1S) | 0.78672 | 0.01961 |
| 1468 | H | 111 | S  | Ryd( 2S) | 0.00072 | 0.61995 |
| 1469 | H | 111 | S  | Ryd( 3S) | 0.00014 | 1.83966 |
| 1470 | H | 111 | px | Ryd( 2p) | 0.00033 | 2.40056 |
| 1471 | H | 111 | py | Ryd( 2p) | 0.00018 | 1.96340 |
| 1472 | H | 111 | pz | Ryd( 2p) | 0.00017 | 1.98654 |
| 1473 | H | 112 | S  | Val( 1S) | 0.79290 | 0.01737 |
| 1474 | H | 112 | S  | Ryd( 2S) | 0.00082 | 0.83015 |
| 1475 | H | 112 | S  | Ryd( 3S) | 0.00017 | 1.69152 |
| 1476 | H | 112 | px | Ryd( 2p) | 0.00023 | 2.05338 |
| 1477 | H | 112 | py | Ryd( 2p) | 0.00020 | 2.00126 |
| 1478 | H | 112 | pz | Ryd( 2p) | 0.00025 | 2.31990 |
| 1479 | H | 113 | S  | Val( 1S) | 0.76404 | 0.04192 |
| 1480 | H | 113 | S  | Ryd( 2S) | 0.00044 | 1.26053 |
| 1481 | H | 113 | S  | Ryd( 3S) | 0.00008 | 2.10641 |
| 1482 | H | 113 | px | Ryd( 2p) | 0.00020 | 2.10158 |
| 1483 | H | 113 | py | Ryd( 2p) | 0.00021 | 2.39888 |
| 1484 | H | 113 | pz | Ryd( 2p) | 0.00016 | 1.92369 |
| 1485 | H | 114 | S  | Val( 1S) | 0.78418 | 0.01830 |
| 1486 | H | 114 | S  | Ryd( 2S) | 0.00059 | 0.63387 |
| 1487 | H | 114 | S  | Ryd( 3S) | 0.00014 | 1.75572 |
| 1488 | H | 114 | px | Ryd( 2p) | 0.00029 | 2.46233 |
| 1489 | H | 114 | py | Ryd( 2p) | 0.00018 | 1.91928 |
| 1490 | H | 114 | pz | Ryd( 2p) | 0.00017 | 1.93262 |
| 1491 | H | 115 | S  | Val( 1S) | 0.78240 | 0.02111 |
| 1492 | H | 115 | S  | Ryd( 2S) | 0.00051 | 0.72657 |
| 1493 | H | 115 | S  | Ryd( 3S) | 0.00012 | 1.75991 |
| 1494 | H | 115 | px | Ryd( 2p) | 0.00014 | 1.89622 |
| 1495 | H | 115 | py | Ryd( 2p) | 0.00020 | 2.12270 |
| 1496 | H | 115 | pz | Ryd( 2p) | 0.00026 | 2.29323 |
| 1497 | H | 116 | S  | Val( 1S) | 0.79000 | 0.01607 |
| 1498 | H | 116 | S  | Ryd( 2S) | 0.00075 | 0.89041 |
| 1499 | H | 116 | S  | Ryd( 3S) | 0.00015 | 1.56445 |

|      |   |     |    |          |         |         |
|------|---|-----|----|----------|---------|---------|
| 1500 | H | 116 | px | Ryd( 2p) | 0.00019 | 1.95637 |
| 1501 | H | 116 | py | Ryd( 2p) | 0.00020 | 2.10505 |
| 1502 | H | 116 | pz | Ryd( 2p) | 0.00027 | 2.25089 |
| 1503 | H | 117 | S  | Val( 1S) | 0.78063 | 0.03275 |
| 1504 | H | 117 | S  | Ryd( 2S) | 0.00058 | 0.69359 |
| 1505 | H | 117 | S  | Ryd( 3S) | 0.00013 | 1.74461 |
| 1506 | H | 117 | px | Ryd( 2p) | 0.00014 | 1.85025 |
| 1507 | H | 117 | py | Ryd( 2p) | 0.00014 | 1.85559 |
| 1508 | H | 117 | pz | Ryd( 2p) | 0.00032 | 2.66936 |
| 1509 | H | 118 | S  | Val( 1S) | 0.79236 | 0.02678 |
| 1510 | H | 118 | S  | Ryd( 2S) | 0.00084 | 0.77086 |
| 1511 | H | 118 | S  | Ryd( 3S) | 0.00012 | 1.67362 |
| 1512 | H | 118 | px | Ryd( 2p) | 0.00018 | 1.92431 |
| 1513 | H | 118 | py | Ryd( 2p) | 0.00032 | 2.59230 |
| 1514 | H | 118 | pz | Ryd( 2p) | 0.00015 | 1.87000 |
| 1515 | H | 119 | S  | Val( 1S) | 0.78849 | 0.03136 |
| 1516 | H | 119 | S  | Ryd( 2S) | 0.00060 | 0.98558 |
| 1517 | H | 119 | S  | Ryd( 3S) | 0.00011 | 1.64427 |
| 1518 | H | 119 | px | Ryd( 2p) | 0.00034 | 2.69236 |
| 1519 | H | 119 | py | Ryd( 2p) | 0.00014 | 1.82501 |
| 1520 | H | 119 | pz | Ryd( 2p) | 0.00014 | 1.86975 |
| 1521 | H | 120 | S  | Val( 1S) | 0.76926 | 0.05063 |
| 1522 | H | 120 | S  | Ryd( 2S) | 0.00053 | 0.74423 |
| 1523 | H | 120 | S  | Ryd( 3S) | 0.00014 | 1.72672 |
| 1524 | H | 120 | px | Ryd( 2p) | 0.00011 | 1.85860 |
| 1525 | H | 120 | py | Ryd( 2p) | 0.00018 | 1.92197 |
| 1526 | H | 120 | pz | Ryd( 2p) | 0.00033 | 2.65841 |
| 1527 | H | 121 | S  | Val( 1S) | 0.76360 | 0.06167 |
| 1528 | H | 121 | S  | Ryd( 2S) | 0.00079 | 0.81272 |
| 1529 | H | 121 | S  | Ryd( 3S) | 0.00020 | 2.45714 |
| 1530 | H | 121 | px | Ryd( 2p) | 0.00014 | 2.11109 |
| 1531 | H | 121 | py | Ryd( 2p) | 0.00027 | 2.28320 |
| 1532 | H | 121 | pz | Ryd( 2p) | 0.00016 | 2.10406 |
| 1533 | H | 122 | S  | Val( 1S) | 0.80520 | 0.02875 |
| 1534 | H | 122 | S  | Ryd( 2S) | 0.00070 | 0.83463 |
| 1535 | H | 122 | S  | Ryd( 3S) | 0.00020 | 1.66866 |
| 1536 | H | 122 | px | Ryd( 2p) | 0.00017 | 2.07325 |
| 1537 | H | 122 | py | Ryd( 2p) | 0.00035 | 2.49322 |
| 1538 | H | 122 | pz | Ryd( 2p) | 0.00016 | 1.84886 |
| 1539 | H | 123 | S  | Val( 1S) | 0.76792 | 0.04954 |
| 1540 | H | 123 | S  | Ryd( 2S) | 0.00067 | 0.70450 |
| 1541 | H | 123 | S  | Ryd( 3S) | 0.00014 | 1.81082 |
| 1542 | H | 123 | px | Ryd( 2p) | 0.00022 | 2.25531 |
| 1543 | H | 123 | py | Ryd( 2p) | 0.00022 | 2.05784 |
| 1544 | H | 123 | pz | Ryd( 2p) | 0.00018 | 2.09328 |
| 1545 | H | 124 | S  | Val( 1S) | 0.80245 | 0.02773 |
| 1546 | H | 124 | S  | Ryd( 2S) | 0.00070 | 0.86851 |
| 1547 | H | 124 | S  | Ryd( 3S) | 0.00018 | 1.62433 |
| 1548 | H | 124 | px | Ryd( 2p) | 0.00021 | 2.03562 |
| 1549 | H | 124 | py | Ryd( 2p) | 0.00020 | 2.12112 |
| 1550 | H | 124 | pz | Ryd( 2p) | 0.00025 | 2.23639 |
| 1551 | H | 125 | S  | Val( 1S) | 0.77264 | 0.04769 |
| 1552 | H | 125 | S  | Ryd( 2S) | 0.00053 | 0.77061 |
| 1553 | H | 125 | S  | Ryd( 3S) | 0.00015 | 2.10057 |
| 1554 | H | 125 | px | Ryd( 2p) | 0.00019 | 2.09747 |
| 1555 | H | 125 | py | Ryd( 2p) | 0.00021 | 2.18799 |
| 1556 | H | 125 | pz | Ryd( 2p) | 0.00021 | 2.14163 |
| 1557 | H | 126 | S  | Val( 1S) | 0.77990 | 0.03374 |
| 1558 | H | 126 | S  | Ryd( 2S) | 0.00057 | 0.69782 |
| 1559 | H | 126 | S  | Ryd( 3S) | 0.00013 | 1.74165 |
| 1560 | H | 126 | px | Ryd( 2p) | 0.00024 | 2.10767 |



|      |   |     |    |          |         |         |
|------|---|-----|----|----------|---------|---------|
| 1561 | H | 126 | py | Ryd( 2p) | 0.00017 | 2.06630 |
| 1562 | H | 126 | pz | Ryd( 2p) | 0.00019 | 2.21072 |
| 1563 | H | 127 | S  | Val( 1S) | 0.78610 | 0.03408 |
| 1564 | H | 127 | S  | Ryd( 2S) | 0.00059 | 1.10145 |
| 1565 | H | 127 | S  | Ryd( 3S) | 0.00012 | 1.54770 |
| 1566 | H | 127 | px | Ryd( 2p) | 0.00018 | 2.09043 |
| 1567 | H | 127 | py | Ryd( 2p) | 0.00023 | 2.27263 |
| 1568 | H | 127 | pz | Ryd( 2p) | 0.00022 | 2.05125 |
| 1569 | H | 128 | S  | Val( 1S) | 0.79321 | 0.02684 |
| 1570 | H | 128 | S  | Ryd( 2S) | 0.00084 | 0.75753 |
| 1571 | H | 128 | S  | Ryd( 3S) | 0.00012 | 1.68447 |
| 1572 | H | 128 | px | Ryd( 2p) | 0.00022 | 2.18818 |
| 1573 | H | 128 | py | Ryd( 2p) | 0.00024 | 2.08634 |
| 1574 | H | 128 | pz | Ryd( 2p) | 0.00019 | 2.11489 |
| 1575 | H | 129 | S  | Val( 1S) | 0.78416 | 0.01812 |
| 1576 | H | 129 | S  | Ryd( 2S) | 0.00059 | 0.63319 |
| 1577 | H | 129 | S  | Ryd( 3S) | 0.00013 | 1.76183 |
| 1578 | H | 129 | px | Ryd( 2p) | 0.00011 | 1.88672 |
| 1579 | H | 129 | py | Ryd( 2p) | 0.00020 | 2.01831 |
| 1580 | H | 129 | pz | Ryd( 2p) | 0.00032 | 2.41811 |
| 1581 | H | 130 | S  | Val( 1S) | 0.78995 | 0.01615 |
| 1582 | H | 130 | S  | Ryd( 2S) | 0.00076 | 0.87756 |
| 1583 | H | 130 | S  | Ryd( 3S) | 0.00015 | 1.57210 |
| 1584 | H | 130 | px | Ryd( 2p) | 0.00016 | 2.10565 |
| 1585 | H | 130 | py | Ryd( 2p) | 0.00034 | 2.40488 |
| 1586 | H | 130 | pz | Ryd( 2p) | 0.00015 | 1.82022 |
| 1587 | H | 131 | S  | Val( 1S) | 0.78295 | 0.02104 |
| 1588 | H | 131 | S  | Ryd( 2S) | 0.00057 | 0.77435 |
| 1589 | H | 131 | S  | Ryd( 3S) | 0.00011 | 1.74234 |
| 1590 | H | 131 | px | Ryd( 2p) | 0.00012 | 1.89364 |
| 1591 | H | 131 | py | Ryd( 2p) | 0.00021 | 2.12270 |
| 1592 | H | 131 | pz | Ryd( 2p) | 0.00026 | 2.29508 |
| 1593 | H | 132 | S  | Val( 1S) | 0.78564 | 0.02073 |
| 1594 | H | 132 | S  | Ryd( 2S) | 0.00073 | 0.56044 |
| 1595 | H | 132 | S  | Ryd( 3S) | 0.00016 | 1.91335 |
| 1596 | H | 132 | px | Ryd( 2p) | 0.00017 | 1.87457 |
| 1597 | H | 132 | py | Ryd( 2p) | 0.00021 | 1.98693 |
| 1598 | H | 132 | pz | Ryd( 2p) | 0.00027 | 2.50432 |
| 1599 | H | 133 | S  | Val( 1S) | 0.76264 | 0.04502 |
| 1600 | H | 133 | S  | Ryd( 2S) | 0.00089 | 0.83922 |
| 1601 | H | 133 | S  | Ryd( 3S) | 0.00022 | 2.42096 |
| 1602 | H | 133 | px | Ryd( 2p) | 0.00034 | 2.69790 |
| 1603 | H | 133 | py | Ryd( 2p) | 0.00014 | 1.83706 |
| 1604 | H | 133 | pz | Ryd( 2p) | 0.00012 | 1.86101 |
| 1605 | H | 134 | S  | Val( 1S) | 0.79518 | 0.01655 |
| 1606 | H | 134 | S  | Ryd( 2S) | 0.00072 | 0.91314 |
| 1607 | H | 134 | S  | Ryd( 3S) | 0.00018 | 1.57788 |
| 1608 | H | 134 | px | Ryd( 2p) | 0.00020 | 1.99169 |
| 1609 | H | 134 | py | Ryd( 2p) | 0.00034 | 2.52503 |
| 1610 | H | 134 | pz | Ryd( 2p) | 0.00014 | 1.85737 |

WARNING: 1 low occupancy (<1.9990e) core orbital found on C 1  
1 low occupancy (<1.9990e) core orbital found on C 3  
1 low occupancy (<1.9990e) core orbital found on C 4  
1 low occupancy (<1.9990e) core orbital found on C 5  
1 low occupancy (<1.9990e) core orbital found on C 10  
1 low occupancy (<1.9990e) core orbital found on B 14  
1 low occupancy (<1.9990e) core orbital found on B 15  
1 low occupancy (<1.9990e) core orbital found on C 16  
1 low occupancy (<1.9990e) core orbital found on C 21  
1 low occupancy (<1.9990e) core orbital found on C 22  
1 low occupancy (<1.9990e) core orbital found on C 26  
1 low occupancy (<1.9990e) core orbital found on C 31

1 low occupancy (<1.9990e) core orbital found on C 32  
 1 low occupancy (<1.9990e) core orbital found on C 36  
 1 low occupancy (<1.9990e) core orbital found on C 41  
 1 low occupancy (<1.9990e) core orbital found on C 42  
 1 low occupancy (<1.9990e) core orbital found on C 46

WARNING: Population inversion found on atom C 6  
 Population inversion found on atom C 8  
 Population inversion found on atom C 10  
 Population inversion found on atom B 14  
 Population inversion found on atom B 15  
 Population inversion found on atom C 16  
 Population inversion found on atom C 23  
 Population inversion found on atom C 25  
 Population inversion found on atom C 29  
 Population inversion found on atom C 30  
 Population inversion found on atom C 37  
 Population inversion found on atom C 38  
 Population inversion found on atom C 39  
 Population inversion found on atom C 40  
 Population inversion found on atom C 43  
 Population inversion found on atom C 45  
 Population inversion found on atom C 49  
 Population inversion found on atom C 50  
 Population inversion found on atom C 51  
 Population inversion found on atom C 62  
 Population inversion found on atom H 63  
 Population inversion found on atom H 64  
 Population inversion found on atom H 66  
 Population inversion found on atom H 71  
 Population inversion found on atom H 72

Summary of Natural Population Analysis:

| Atom | No | Natural Charge | Natural Population |         |         |         |
|------|----|----------------|--------------------|---------|---------|---------|
|      |    |                | Core               | Valence | Rydberg | Total   |
| C    | 1  | 0.12851        | 1.99866            | 3.83690 | 0.03593 | 5.87149 |
| O    | 2  | -0.61101       | 1.99981            | 6.59309 | 0.01810 | 8.61101 |
| C    | 3  | 0.02479        | 1.99898            | 3.95929 | 0.01694 | 5.97521 |
| C    | 4  | 0.12115        | 1.99875            | 3.86161 | 0.01849 | 5.87885 |
| C    | 5  | 0.00766        | 1.99898            | 3.97651 | 0.01685 | 5.99234 |
| C    | 6  | -0.22364       | 1.99909            | 4.21174 | 0.01281 | 6.22364 |
| C    | 7  | -0.19852       | 1.99920            | 4.18597 | 0.01335 | 6.19852 |
| C    | 8  | -0.22205       | 1.99910            | 4.21020 | 0.01275 | 6.22205 |
| N    | 9  | -0.33973       | 1.99944            | 5.32065 | 0.01964 | 7.33973 |
| C    | 10 | 0.12972        | 1.99868            | 3.85010 | 0.02150 | 5.87028 |
| N    | 11 | -0.33974       | 1.99943            | 5.32037 | 0.01994 | 7.33974 |
| C    | 12 | -0.09948       | 1.99902            | 4.08373 | 0.01672 | 6.09948 |
| C    | 13 | -0.10033       | 1.99902            | 4.08462 | 0.01669 | 6.10033 |
| B    | 14 | 0.06235        | 1.99770            | 2.92790 | 0.01206 | 4.93765 |
| B    | 15 | -0.16142       | 1.99698            | 3.15022 | 0.01422 | 5.16142 |
| C    | 16 | 0.21605        | 1.99875            | 3.76261 | 0.02260 | 5.78395 |
| N    | 17 | -0.31003       | 1.99942            | 5.29160 | 0.01901 | 7.31003 |
| C    | 18 | -0.08187       | 1.99904            | 4.06665 | 0.01618 | 6.08187 |
| C    | 19 | -0.09119       | 1.99904            | 4.07606 | 0.01610 | 6.09119 |
| N    | 20 | -0.31522       | 1.99942            | 5.29648 | 0.01932 | 7.31522 |
| C    | 21 | 0.11509        | 1.99873            | 3.86635 | 0.01983 | 5.88491 |
| C    | 22 | 0.03333        | 1.99897            | 3.94819 | 0.01951 | 5.96667 |
| C    | 23 | -0.20835       | 1.99909            | 4.19618 | 0.01307 | 6.20835 |
| C    | 24 | -0.19335       | 1.99920            | 4.18089 | 0.01326 | 6.19335 |
| C    | 25 | -0.22024       | 1.99909            | 4.20856 | 0.01259 | 6.22024 |
| C    | 26 | 0.00362        | 1.99898            | 3.98038 | 0.01703 | 5.99638 |
| C    | 27 | -0.25193       | 1.99936            | 4.23978 | 0.01279 | 6.25193 |
| C    | 28 | -0.61366       | 1.99941            | 4.60773 | 0.00651 | 6.61366 |
| C    | 29 | -0.24838       | 1.99937            | 4.23747 | 0.01154 | 6.24838 |
| C    | 30 | -0.61635       | 1.99942            | 4.61023 | 0.00669 | 6.61635 |
| C    | 31 | 0.11991        | 1.99874            | 3.86256 | 0.01879 | 5.88009 |
| C    | 32 | 0.01230        | 1.99898            | 3.97191 | 0.01681 | 5.98770 |

|   |     |          |         |         |         |         |
|---|-----|----------|---------|---------|---------|---------|
| C | 33  | -0.21880 | 1.99910 | 4.20700 | 0.01270 | 6.21880 |
| C | 34  | -0.19625 | 1.99920 | 4.18381 | 0.01324 | 6.19625 |
| C | 35  | -0.21794 | 1.99909 | 4.20626 | 0.01258 | 6.21794 |
| C | 36  | 0.02057  | 1.99898 | 3.96347 | 0.01698 | 5.97943 |
| C | 37  | -0.25060 | 1.99937 | 4.23978 | 0.01145 | 6.25060 |
| C | 38  | -0.61786 | 1.99943 | 4.61167 | 0.00676 | 6.61786 |
| C | 39  | -0.25073 | 1.99936 | 4.23974 | 0.01162 | 6.25073 |
| C | 40  | -0.61509 | 1.99942 | 4.60912 | 0.00654 | 6.61509 |
| C | 41  | 0.11788  | 1.99874 | 3.86488 | 0.01850 | 5.88212 |
| C | 42  | 0.02420  | 1.99899 | 3.96030 | 0.01651 | 5.97580 |
| C | 43  | -0.22241 | 1.99910 | 4.21035 | 0.01296 | 6.22241 |
| C | 44  | -0.19794 | 1.99919 | 4.18527 | 0.01348 | 6.19794 |
| C | 45  | -0.22485 | 1.99909 | 4.21281 | 0.01295 | 6.22485 |
| C | 46  | 0.00736  | 1.99898 | 3.97663 | 0.01702 | 5.99264 |
| C | 47  | -0.27005 | 1.99935 | 4.25789 | 0.01280 | 6.27005 |
| C | 48  | -0.61283 | 1.99941 | 4.60686 | 0.00656 | 6.61283 |
| C | 49  | -0.25270 | 1.99937 | 4.24142 | 0.01191 | 6.25270 |
| C | 50  | -0.61581 | 1.99942 | 4.60964 | 0.00675 | 6.61581 |
| C | 51  | -0.25198 | 1.99937 | 4.24086 | 0.01176 | 6.25198 |
| C | 52  | -0.61613 | 1.99942 | 4.60996 | 0.00675 | 6.61613 |
| C | 53  | -0.26380 | 1.99935 | 4.25171 | 0.01274 | 6.26380 |
| C | 54  | -0.61166 | 1.99941 | 4.60578 | 0.00647 | 6.61166 |
| C | 55  | -0.62250 | 1.99942 | 4.61558 | 0.00750 | 6.62250 |
| C | 56  | -0.62154 | 1.99942 | 4.61431 | 0.00781 | 6.62154 |
| C | 57  | -0.62160 | 1.99943 | 4.61404 | 0.00814 | 6.62160 |
| C | 58  | -0.61998 | 1.99942 | 4.61313 | 0.00744 | 6.61998 |
| C | 59  | -0.62050 | 1.99942 | 4.61399 | 0.00710 | 6.62050 |
| C | 60  | -0.62176 | 1.99943 | 4.61390 | 0.00843 | 6.62176 |
| C | 61  | -0.62070 | 1.99942 | 4.61383 | 0.00744 | 6.62070 |
| C | 62  | -0.63365 | 1.99942 | 4.62633 | 0.00790 | 6.63365 |
| H | 63  | 0.24307  | 0.00000 | 0.75545 | 0.00147 | 0.75693 |
| H | 64  | 0.24134  | 0.00000 | 0.75718 | 0.00148 | 0.75866 |
| H | 65  | 0.21351  | 0.00000 | 0.78418 | 0.00232 | 0.78649 |
| H | 66  | 0.21660  | 0.00000 | 0.78213 | 0.00126 | 0.78340 |
| H | 67  | 0.21914  | 0.00000 | 0.77872 | 0.00215 | 0.78086 |
| H | 68  | 0.21790  | 0.00000 | 0.77961 | 0.00250 | 0.78210 |
| H | 69  | 0.21869  | 0.00000 | 0.78001 | 0.00130 | 0.78131 |
| H | 70  | 0.21590  | 0.00000 | 0.78187 | 0.00224 | 0.78410 |
| H | 71  | 0.23860  | 0.00000 | 0.75987 | 0.00153 | 0.76140 |
| H | 72  | 0.23821  | 0.00000 | 0.76024 | 0.00155 | 0.76179 |
| H | 73  | 0.21223  | 0.00000 | 0.78537 | 0.00241 | 0.78777 |
| H | 74  | 0.21573  | 0.00000 | 0.78298 | 0.00130 | 0.78427 |
| H | 75  | 0.21863  | 0.00000 | 0.77911 | 0.00226 | 0.78137 |
| H | 76  | 0.21854  | 0.00000 | 0.77901 | 0.00244 | 0.78146 |
| H | 77  | 0.21520  | 0.00000 | 0.78351 | 0.00128 | 0.78480 |
| H | 78  | 0.21217  | 0.00000 | 0.78550 | 0.00233 | 0.78783 |
| H | 79  | 0.22590  | 0.00000 | 0.77152 | 0.00258 | 0.77410 |
| H | 80  | 0.26210  | 0.00000 | 0.73341 | 0.00449 | 0.73790 |
| H | 81  | 0.22511  | 0.00000 | 0.77214 | 0.00275 | 0.77489 |
| H | 82  | 0.25313  | 0.00000 | 0.74296 | 0.00391 | 0.74687 |
| H | 83  | 0.21729  | 0.00000 | 0.78007 | 0.00264 | 0.78271 |
| H | 84  | 0.23067  | 0.00000 | 0.76670 | 0.00263 | 0.76933 |
| H | 85  | 0.21917  | 0.00000 | 0.77807 | 0.00276 | 0.78083 |
| H | 86  | 0.22383  | 0.00000 | 0.77367 | 0.00250 | 0.77617 |
| H | 87  | 0.21320  | 0.00000 | 0.78542 | 0.00138 | 0.78680 |
| H | 88  | 0.19770  | 0.00000 | 0.80078 | 0.00152 | 0.80230 |
| H | 89  | 0.26129  | 0.00000 | 0.73700 | 0.00172 | 0.73871 |
| H | 90  | 0.21502  | 0.00000 | 0.78364 | 0.00134 | 0.78498 |
| H | 91  | 0.20842  | 0.00000 | 0.79026 | 0.00132 | 0.79158 |
| H | 92  | 0.21046  | 0.00000 | 0.78793 | 0.00161 | 0.78954 |
| H | 93  | 0.21461  | 0.00000 | 0.78404 | 0.00135 | 0.78539 |
| H | 94  | 0.21027  | 0.00000 | 0.78819 | 0.00153 | 0.78973 |
| H | 95  | 0.21410  | 0.00000 | 0.78467 | 0.00123 | 0.78590 |
| H | 96  | 0.21243  | 0.00000 | 0.78602 | 0.00155 | 0.78757 |
| H | 97  | 0.23875  | 0.00000 | 0.75954 | 0.00171 | 0.76125 |
| H | 98  | 0.20721  | 0.00000 | 0.79127 | 0.00152 | 0.79279 |
| H | 99  | 0.21735  | 0.00000 | 0.78131 | 0.00134 | 0.78265 |
| H | 100 | 0.20872  | 0.00000 | 0.78971 | 0.00157 | 0.79128 |
| H | 101 | 0.21299  | 0.00000 | 0.78575 | 0.00126 | 0.78701 |
| H | 102 | 0.21652  | 0.00000 | 0.78209 | 0.00138 | 0.78348 |
| H | 103 | 0.24558  | 0.00000 | 0.75294 | 0.00148 | 0.75442 |

|   |     |         |         |         |         |         |
|---|-----|---------|---------|---------|---------|---------|
| H | 104 | 0.20486 | 0.00000 | 0.79353 | 0.00160 | 0.79514 |
| H | 105 | 0.21737 | 0.00000 | 0.78132 | 0.00131 | 0.78263 |
| H | 106 | 0.21608 | 0.00000 | 0.78269 | 0.00123 | 0.78392 |
| H | 107 | 0.20821 | 0.00000 | 0.79026 | 0.00153 | 0.79179 |
| H | 108 | 0.21386 | 0.00000 | 0.78460 | 0.00154 | 0.78614 |
| H | 109 | 0.20828 | 0.00000 | 0.79003 | 0.00170 | 0.79172 |
| H | 110 | 0.24298 | 0.00000 | 0.75556 | 0.00146 | 0.75702 |
| H | 111 | 0.21175 | 0.00000 | 0.78672 | 0.00153 | 0.78825 |
| H | 112 | 0.20542 | 0.00000 | 0.79290 | 0.00168 | 0.79458 |
| H | 113 | 0.23486 | 0.00000 | 0.76404 | 0.00111 | 0.76514 |
| H | 114 | 0.21445 | 0.00000 | 0.78418 | 0.00136 | 0.78555 |
| H | 115 | 0.21635 | 0.00000 | 0.78240 | 0.00124 | 0.78365 |
| H | 116 | 0.20845 | 0.00000 | 0.79000 | 0.00156 | 0.79155 |
| H | 117 | 0.21805 | 0.00000 | 0.78063 | 0.00132 | 0.78195 |
| H | 118 | 0.20603 | 0.00000 | 0.79236 | 0.00161 | 0.79397 |
| H | 119 | 0.21019 | 0.00000 | 0.78849 | 0.00133 | 0.78981 |
| H | 120 | 0.22945 | 0.00000 | 0.76926 | 0.00129 | 0.77055 |
| H | 121 | 0.23485 | 0.00000 | 0.76360 | 0.00156 | 0.76515 |
| H | 122 | 0.19322 | 0.00000 | 0.80520 | 0.00158 | 0.80678 |
| H | 123 | 0.23063 | 0.00000 | 0.76792 | 0.00144 | 0.76937 |
| H | 124 | 0.19600 | 0.00000 | 0.80245 | 0.00155 | 0.80400 |
| H | 125 | 0.22607 | 0.00000 | 0.77264 | 0.00129 | 0.77393 |
| H | 126 | 0.21880 | 0.00000 | 0.77990 | 0.00131 | 0.78120 |
| H | 127 | 0.21257 | 0.00000 | 0.78610 | 0.00133 | 0.78743 |
| H | 128 | 0.20518 | 0.00000 | 0.79321 | 0.00161 | 0.79482 |
| H | 129 | 0.21449 | 0.00000 | 0.78416 | 0.00135 | 0.78551 |
| H | 130 | 0.20848 | 0.00000 | 0.78995 | 0.00156 | 0.79152 |
| H | 131 | 0.21577 | 0.00000 | 0.78295 | 0.00128 | 0.78423 |
| H | 132 | 0.21281 | 0.00000 | 0.78564 | 0.00154 | 0.78719 |
| H | 133 | 0.23566 | 0.00000 | 0.76264 | 0.00170 | 0.76434 |
| H | 134 | 0.20324 | 0.00000 | 0.79518 | 0.00158 | 0.79676 |

=====  
\* Total \*      0.00000      123.94637      323.08119      0.97245      448.00000

Natural Population

-----  
Core                                      123.94637 ( 99.9567% of 124)  
Valence                                    323.08119 ( 99.7164% of 324)  
Natural Minimal Basis                  447.02755 ( 99.7829% of 448)  
Natural Rydberg Basis                  0.97245 ( 0.2171% of 448)  
-----

Atom No                                  Natural Electron Configuration

-----  
C    1            [core]2S( 0.91)2p( 2.92)3S( 0.01)3p( 0.02)3d( 0.01)  
O    2            [core]2S( 1.70)2p( 4.89)3p( 0.01)  
C    3            [core]2S( 0.93)2p( 3.03)3p( 0.01)  
C    4            [core]2S( 0.87)2p( 2.99)3p( 0.01)  
C    5            [core]2S( 0.92)2p( 3.05)3p( 0.01)  
C    6            [core]2S( 0.97)2p( 3.24)  
C    7            [core]2S( 0.98)2p( 3.21)3p( 0.01)  
C    8            [core]2S( 0.97)2p( 3.24)3p( 0.01)  
N    9            [core]2S( 1.19)2p( 4.13)3p( 0.01)  
C    10           [core]2S( 0.95)2p( 2.90)3p( 0.01)4p( 0.01)  
N    11           [core]2S( 1.19)2p( 4.13)3p( 0.01)  
C    12           [core]2S( 0.95)2p( 3.13)3p( 0.01)  
C    13           [core]2S( 0.95)2p( 3.13)3p( 0.01)  
B    14           [core]2S( 0.66)2p( 2.26)  
B    15           [core]2S( 0.62)2p( 2.53)  
C    16           [core]2S( 0.95)2p( 2.81)3p( 0.01)4p( 0.01)  
N    17           [core]2S( 1.20)2p( 4.10)3p( 0.01)  
C    18           [core]2S( 0.95)2p( 3.11)3p( 0.01)  
C    19           [core]2S( 0.96)2p( 3.12)3p( 0.01)  
N    20           [core]2S( 1.19)2p( 4.10)3p( 0.01)  
C    21           [core]2S( 0.87)2p( 3.00)3p( 0.01)  
C    22           [core]2S( 0.92)2p( 3.03)3p( 0.01)  
C    23           [core]2S( 0.97)2p( 3.22)  
C    24           [core]2S( 0.98)2p( 3.20)3p( 0.01)  
C    25           [core]2S( 0.97)2p( 3.24)3p( 0.01)  
C    26           [core]2S( 0.92)2p( 3.06)3p( 0.01)  
C    27           [core]2S( 1.00)2p( 3.24)3p( 0.01)  
-----

|   |    |                                   |
|---|----|-----------------------------------|
| C | 28 | [core]2S( 1.12)2p( 3.49)          |
| C | 29 | [core]2S( 1.00)2p( 3.24)3p( 0.01) |
| C | 30 | [core]2S( 1.12)2p( 3.49)          |
| C | 31 | [core]2S( 0.87)2p( 3.00)3p( 0.01) |
| C | 32 | [core]2S( 0.92)2p( 3.05)3p( 0.01) |
| C | 33 | [core]2S( 0.97)2p( 3.23)3p( 0.01) |
| C | 34 | [core]2S( 0.98)2p( 3.21)3p( 0.01) |
| C | 35 | [core]2S( 0.97)2p( 3.23)3p( 0.01) |
| C | 36 | [core]2S( 0.92)2p( 3.04)3p( 0.01) |
| C | 37 | [core]2S( 1.00)2p( 3.24)3p( 0.01) |
| C | 38 | [core]2S( 1.11)2p( 3.50)          |
| C | 39 | [core]2S( 1.00)2p( 3.24)3p( 0.01) |
| C | 40 | [core]2S( 1.12)2p( 3.49)          |
| C | 41 | [core]2S( 0.87)2p( 3.00)3p( 0.01) |
| C | 42 | [core]2S( 0.93)2p( 3.03)3p( 0.01) |
| C | 43 | [core]2S( 0.97)2p( 3.24)3p( 0.01) |
| C | 44 | [core]2S( 0.98)2p( 3.21)3p( 0.01) |
| C | 45 | [core]2S( 0.97)2p( 3.24)3p( 0.01) |
| C | 46 | [core]2S( 0.92)2p( 3.05)3p( 0.01) |
| C | 47 | [core]2S( 1.00)2p( 3.26)3p( 0.01) |
| C | 48 | [core]2S( 1.12)2p( 3.49)          |
| C | 49 | [core]2S( 1.00)2p( 3.25)3p( 0.01) |
| C | 50 | [core]2S( 1.12)2p( 3.49)          |
| C | 51 | [core]2S( 1.00)2p( 3.24)3p( 0.01) |
| C | 52 | [core]2S( 1.12)2p( 3.49)          |
| C | 53 | [core]2S( 1.00)2p( 3.25)3p( 0.01) |
| C | 54 | [core]2S( 1.12)2p( 3.49)          |
| C | 55 | [core]2S( 1.12)2p( 3.50)          |
| C | 56 | [core]2S( 1.11)2p( 3.50)          |
| C | 57 | [core]2S( 1.11)2p( 3.50)          |
| C | 58 | [core]2S( 1.11)2p( 3.50)          |
| C | 59 | [core]2S( 1.11)2p( 3.50)          |
| C | 60 | [core]2S( 1.11)2p( 3.50)          |
| C | 61 | [core]2S( 1.12)2p( 3.50)          |
| C | 62 | [core]2S( 1.11)2p( 3.51)          |
| H | 63 | 1S( 0.76)                         |
| H | 64 | 1S( 0.76)                         |
| H | 65 | 1S( 0.78)                         |
| H | 66 | 1S( 0.78)                         |
| H | 67 | 1S( 0.78)                         |
| H | 68 | 1S( 0.78)                         |
| H | 69 | 1S( 0.78)                         |
| H | 70 | 1S( 0.78)                         |
| H | 71 | 1S( 0.76)                         |
| H | 72 | 1S( 0.76)                         |
| H | 73 | 1S( 0.79)                         |
| H | 74 | 1S( 0.78)                         |
| H | 75 | 1S( 0.78)                         |
| H | 76 | 1S( 0.78)                         |
| H | 77 | 1S( 0.78)                         |
| H | 78 | 1S( 0.79)                         |
| H | 79 | 1S( 0.77)                         |
| H | 80 | 1S( 0.73)                         |
| H | 81 | 1S( 0.77)                         |
| H | 82 | 1S( 0.74)                         |
| H | 83 | 1S( 0.78)                         |
| H | 84 | 1S( 0.77)                         |
| H | 85 | 1S( 0.78)                         |
| H | 86 | 1S( 0.77)                         |
| H | 87 | 1S( 0.79)                         |
| H | 88 | 1S( 0.80)                         |
| H | 89 | 1S( 0.74)                         |
| H | 90 | 1S( 0.78)                         |
| H | 91 | 1S( 0.79)                         |
| H | 92 | 1S( 0.79)                         |
| H | 93 | 1S( 0.78)                         |
| H | 94 | 1S( 0.79)                         |
| H | 95 | 1S( 0.78)                         |
| H | 96 | 1S( 0.79)                         |
| H | 97 | 1S( 0.76)                         |
| H | 98 | 1S( 0.79)                         |

H 99 1S( 0.78)  
H 100 1S( 0.79)  
H 101 1S( 0.79)  
H 102 1S( 0.78)  
H 103 1S( 0.75)  
H 104 1S( 0.79)  
H 105 1S( 0.78)  
H 106 1S( 0.78)  
H 107 1S( 0.79)  
H 108 1S( 0.78)  
H 109 1S( 0.79)  
H 110 1S( 0.76)  
H 111 1S( 0.79)  
H 112 1S( 0.79)  
H 113 1S( 0.76)  
H 114 1S( 0.78)  
H 115 1S( 0.78)  
H 116 1S( 0.79)  
H 117 1S( 0.78)  
H 118 1S( 0.79)  
H 119 1S( 0.79)  
H 120 1S( 0.77)  
H 121 1S( 0.76)  
H 122 1S( 0.81)  
H 123 1S( 0.77)  
H 124 1S( 0.80)  
H 125 1S( 0.77)  
H 126 1S( 0.78)  
H 127 1S( 0.79)  
H 128 1S( 0.79)  
H 129 1S( 0.78)  
H 130 1S( 0.79)  
H 131 1S( 0.78)  
H 132 1S( 0.79)  
H 133 1S( 0.76)  
H 134 1S( 0.80)

NATURAL BOND ORBITAL ANALYSIS:

| Cycle | Occ.<br>Thresh. | Occupancies |           | Lewis Structure |     |    |    | Low        | High        | Dev  |
|-------|-----------------|-------------|-----------|-----------------|-----|----|----|------------|-------------|------|
|       |                 | Lewis       | Non-Lewis | CR              | BD  | 3C | LP | occ<br>(L) | occ<br>(NL) |      |
| 1(1)  | 1.90            | 426.68707   | 21.31293  | 62              | 140 | 0  | 22 | 21         | 21          | 1.25 |
| 2(2)  | 1.90            | 426.68707   | 21.31293  | 62              | 140 | 0  | 22 | 21         | 21          | 1.25 |
| 3(1)  | 1.80            | 429.54420   | 18.45580  | 62              | 145 | 0  | 17 | 16         | 19          | 0.89 |
| 4(2)  | 1.80            | 429.54420   | 18.45580  | 62              | 145 | 0  | 17 | 16         | 19          | 0.89 |
| 5(1)  | 1.70            | 429.45121   | 18.54879  | 62              | 144 | 0  | 18 | 16         | 19          | 0.89 |
| 6(2)  | 1.70            | 429.45121   | 18.54879  | 62              | 144 | 0  | 18 | 16         | 19          | 0.89 |
| 7(1)  | 1.60            | 436.90072   | 11.09928  | 62              | 158 | 0  | 4  | 2          | 20          | 0.44 |
| 8(2)  | 1.60            | 436.49078   | 11.50922  | 62              | 157 | 0  | 5  | 3          | 20          | 0.44 |
| 9(3)  | 1.60            | 436.90072   | 11.09928  | 62              | 158 | 0  | 4  | 2          | 20          | 0.44 |
| 10(1) | 1.50            | 436.58556   | 11.41444  | 62              | 154 | 0  | 8  | 1          | 19          | 0.55 |
| 11(2) | 1.50            | 436.58556   | 11.41444  | 62              | 154 | 0  | 8  | 1          | 19          | 0.55 |
| 12(1) | 1.60            | 436.90072   | 11.09928  | 62              | 158 | 0  | 4  | 2          | 20          | 0.44 |

Structure accepted: RESONANCE keyword permits strongly delocalized structure

WARNING: 1 low occupancy (<1.9990e) core orbital found on C 1  
1 low occupancy (<1.9990e) core orbital found on C 3  
1 low occupancy (<1.9990e) core orbital found on C 4  
1 low occupancy (<1.9990e) core orbital found on C 5  
1 low occupancy (<1.9990e) core orbital found on C 10  
1 low occupancy (<1.9990e) core orbital found on B 14  
1 low occupancy (<1.9990e) core orbital found on B 15  
1 low occupancy (<1.9990e) core orbital found on C 16  
1 low occupancy (<1.9990e) core orbital found on C 21  
1 low occupancy (<1.9990e) core orbital found on C 22  
1 low occupancy (<1.9990e) core orbital found on C 26

1 low occupancy (<1.9990e) core orbital found on C 31  
 1 low occupancy (<1.9990e) core orbital found on C 32  
 1 low occupancy (<1.9990e) core orbital found on C 36  
 1 low occupancy (<1.9990e) core orbital found on C 41  
 1 low occupancy (<1.9990e) core orbital found on C 42  
 1 low occupancy (<1.9990e) core orbital found on C 46

|                   |                             |
|-------------------|-----------------------------|
| Core              | 123.94632 ( 99.957% of 124) |
| Valence Lewis     | 312.95441 ( 96.591% of 324) |
| =====             |                             |
| Total Lewis       | 436.90072 ( 97.522% of 448) |
| -----             |                             |
| Valence non-Lewis | 10.37751 ( 2.316% of 448)   |
| Rydberg non-Lewis | 0.72177 ( 0.161% of 448)    |
| =====             |                             |
| Total non-Lewis   | 11.09928 ( 2.478% of 448)   |
| -----             |                             |

| (Occupancy)  | Bond orbital/ | Coefficients/  | Hybrids                                |
|--------------|---------------|----------------|----------------------------------------|
| -----        |               |                |                                        |
| 1. (1.99525) | BD ( 1) C     | 1 - O          | 2                                      |
| ( 35.42%)    | 0.5952* C     | 1 s( 34.37%)p  | 1.91( 65.56%)d 0.00( 0.06%)            |
|              |               |                | -0.0003 0.5810 0.0787 0.0026 0.0008    |
|              |               |                | -0.1509 0.0180 -0.0037 0.2199 -0.0122  |
|              |               |                | 0.0042 -0.7618 0.0561 -0.0225 -0.0018  |
|              |               |                | 0.0052 -0.0118 -0.0016 0.0209          |
| ( 64.58%)    | 0.8036* O     | 2 s( 39.92%)p  | 1.50( 59.94%)d 0.00( 0.14%)            |
|              |               |                | 0.0000 0.6315 -0.0188 0.0010 0.0004    |
|              |               |                | 0.1663 -0.0065 0.0004 -0.1629 0.0093   |
|              |               |                | -0.0006 0.7377 -0.0308 0.0019 -0.0037  |
|              |               |                | 0.0129 -0.0137 -0.0010 0.0316          |
| 2. (1.98559) | BD ( 2) C     | 1 - O          | 2                                      |
| ( 26.78%)    | 0.5175* C     | 1 s( 0.01%)p   | 99.99( 99.72%)d 18.73( 0.27%)          |
|              |               |                | 0.0002 -0.0112 -0.0035 -0.0020 -0.0003 |
|              |               |                | -0.2669 0.0057 0.0009 0.9119 -0.0046   |
|              |               |                | 0.0006 0.3072 -0.0019 0.0018 -0.0103   |
|              |               |                | 0.0104 -0.0412 -0.0105 -0.0253         |
| ( 73.22%)    | 0.8557* O     | 2 s( 0.02%)p   | 99.99( 99.88%)d 5.56( 0.10%)           |
|              |               |                | 0.0000 -0.0134 -0.0014 -0.0001 0.0000  |
|              |               |                | -0.2373 0.0040 0.0009 0.9322 -0.0117   |
|              |               |                | -0.0030 0.2709 -0.0019 -0.0007 0.0081  |
|              |               |                | -0.0058 0.0259 0.0058 0.0143           |
| 3. (1.68991) | BD ( 1) C     | 1 - B          | 14                                     |
| ( 60.05%)    | 0.7749* C     | 1 s( 25.83%)p  | 2.87( 74.14%)d 0.00( 0.03%)            |
|              |               |                | -0.0001 0.5076 -0.0246 -0.0070 -0.0004 |
|              |               |                | 0.8031 0.0080 -0.0050 0.1500 -0.0005   |
|              |               |                | 0.0048 0.2708 0.0196 -0.0097 0.0031    |
|              |               |                | 0.0135 -0.0001 0.0090 0.0021           |
| ( 39.95%)    | 0.6321* B     | 14 s( 18.02%)p | 4.55( 81.92%)d 0.00( 0.06%)            |
|              |               |                | -0.0048 0.4244 0.0071 -0.0015 -0.0003  |
|              |               |                | -0.4109 0.0053 -0.0033 0.0158 0.0057   |
|              |               |                | 0.0025 -0.8062 -0.0060 -0.0081 0.0063  |
|              |               |                | 0.0176 -0.0066 0.0089 0.0131           |
| 4. (1.86978) | BD ( 1) C     | 1 - B          | 15                                     |
| ( 60.99%)    | 0.7810* C     | 1 s( 40.15%)p  | 1.49( 59.83%)d 0.00( 0.02%)            |
|              |               |                | 0.0001 -0.6328 0.0332 -0.0034 0.0001   |
|              |               |                | 0.5101 0.0005 0.0070 0.3077 0.0062     |
|              |               |                | 0.0019 -0.4931 -0.0133 0.0081 -0.0030  |
|              |               |                | 0.0054 0.0082 0.0022 -0.0088           |
| ( 39.01%)    | 0.6246* B     | 15 s( 26.26%)p | 2.81( 73.68%)d 0.00( 0.06%)            |
|              |               |                | 0.0013 -0.5124 0.0006 -0.0061 -0.0024  |
|              |               |                | 0.1733 0.0148 0.0020 -0.2436 0.0080    |
|              |               |                | -0.0044 0.8041 -0.0048 0.0218 -0.0056  |
|              |               |                | -0.0010 0.0151 0.0019 -0.0182          |
| 5. (1.96959) | BD ( 1) C     | 3 - C          | 4                                      |
| ( 49.25%)    | 0.7018* C     | 3 s( 33.55%)p  | 1.98( 66.40%)d 0.00( 0.05%)            |
|              |               |                | 0.0000 0.5792 0.0032 -0.0011 0.0000    |
|              |               |                | 0.6350 0.0004 0.0019 -0.3736 0.0069    |
|              |               |                | -0.0003 0.3477 0.0118 -0.0009 -0.0140  |

|     |           |         |   |       |             |                  |                 |  |         |         |         |         |         |
|-----|-----------|---------|---|-------|-------------|------------------|-----------------|--|---------|---------|---------|---------|---------|
|     |           |         |   |       |             |                  |                 |  | 0.0145  | -0.0072 | 0.0091  | -0.0030 |         |
|     | ( 50.75%) | 0.7124* | C | 4     | s ( 36.74%) | p 1.72 ( 63.22%) | d 0.00 ( 0.05%) |  | -0.0002 | 0.6061  | -0.0011 | -0.0031 | 0.0001  |
|     |           |         |   |       |             |                  |                 |  | -0.6195 | -0.0040 | 0.0023  | 0.3295  | 0.0077  |
|     |           |         |   |       |             |                  |                 |  | 0.0040  | -0.3739 | 0.0032  | 0.0010  | -0.0129 |
|     |           |         |   |       |             |                  |                 |  | 0.0138  | -0.0072 | 0.0075  | -0.0019 |         |
| 6.  | (1.97359) | BD ( 1) | C | 3 - C | 8           |                  |                 |  |         |         |         |         |         |
|     | ( 50.42%) | 0.7101* | C | 3     | s ( 34.07%) | p 1.93 ( 65.88%) | d 0.00 ( 0.05%) |  | -0.0001 | 0.5836  | 0.0091  | 0.0048  | 0.0002  |
|     |           |         |   |       |             |                  |                 |  | -0.4788 | 0.0077  | -0.0076 | 0.4929  | -0.0029 |
|     |           |         |   |       |             |                  |                 |  | 0.0080  | 0.4318  | 0.0076  | -0.0010 | -0.0138 |
|     |           |         |   |       |             |                  |                 |  | -0.0104 | 0.0129  | -0.0009 | 0.0007  |         |
|     | ( 49.58%) | 0.7041* | C | 8     | s ( 35.90%) | p 1.78 ( 64.04%) | d 0.00 ( 0.06%) |  | 0.0001  | 0.5992  | -0.0007 | -0.0043 | -0.0002 |
|     |           |         |   |       |             |                  |                 |  | 0.4507  | -0.0025 | -0.0059 | -0.4802 | -0.0069 |
|     |           |         |   |       |             |                  |                 |  | 0.0071  | -0.4539 | -0.0196 | 0.0025  | -0.0166 |
|     |           |         |   |       |             |                  |                 |  | -0.0120 | 0.0142  | 0.0003  | -0.0001 |         |
| 7.  | (1.63548) | BD ( 2) | C | 3 - C | 8           |                  |                 |  |         |         |         |         |         |
|     | ( 47.79%) | 0.6913* | C | 3     | s ( 0.01%)  | p 1.00 ( 99.96%) | d 0.00 ( 0.04%) |  | -0.0002 | -0.0061 | -0.0052 | 0.0017  | 0.0003  |
|     |           |         |   |       |             |                  |                 |  | 0.5871  | -0.0051 | -0.0041 | 0.7766  | -0.0049 |
|     |           |         |   |       |             |                  |                 |  | 0.0038  | -0.2274 | 0.0013  | 0.0034  | 0.0020  |
|     |           |         |   |       |             |                  |                 |  | 0.0102  | 0.0115  | -0.0080 | -0.0077 |         |
|     | ( 52.21%) | 0.7226* | C | 8     | s ( 0.00%)  | p 1.00 ( 99.97%) | d 0.00 ( 0.03%) |  | 0.0000  | -0.0005 | 0.0012  | -0.0001 | 0.0005  |
|     |           |         |   |       |             |                  |                 |  | 0.5811  | -0.0025 | 0.0077  | 0.7759  | -0.0046 |
|     |           |         |   |       |             |                  |                 |  | 0.0117  | -0.2444 | 0.0029  | -0.0050 | 0.0039  |
|     |           |         |   |       |             |                  |                 |  | -0.0044 | 0.0011  | 0.0165  | 0.0008  |         |
| 8.  | (1.96975) | BD ( 1) | C | 3 - C | 53          |                  |                 |  |         |         |         |         |         |
|     | ( 50.58%) | 0.7112* | C | 3     | s ( 32.34%) | p 2.09 ( 67.63%) | d 0.00 ( 0.03%) |  | -0.0001 | 0.5687  | -0.0066 | -0.0047 | -0.0002 |
|     |           |         |   |       |             |                  |                 |  | -0.1492 | -0.0019 | -0.0020 | -0.1170 | 0.0003  |
|     |           |         |   |       |             |                  |                 |  | 0.0019  | -0.8000 | -0.0171 | 0.0075  | -0.0010 |
|     |           |         |   |       |             |                  |                 |  | 0.0041  | 0.0037  | 0.0004  | 0.0167  |         |
|     | ( 49.42%) | 0.7030* | C | 53    | s ( 26.35%) | p 2.79 ( 73.59%) | d 0.00 ( 0.06%) |  | 0.0002  | 0.5134  | -0.0001 | 0.0003  | 0.0007  |
|     |           |         |   |       |             |                  |                 |  | 0.1312  | -0.0019 | -0.0018 | 0.1039  | -0.0049 |
|     |           |         |   |       |             |                  |                 |  | 0.0005  | 0.8413  | -0.0005 | 0.0012  | 0.0017  |
|     |           |         |   |       |             |                  |                 |  | 0.0071  | 0.0055  | 0.0001  | 0.0222  |         |
| 9.  | (1.96881) | BD ( 1) | C | 4 - C | 5           |                  |                 |  |         |         |         |         |         |
|     | ( 50.40%) | 0.7100* | C | 4     | s ( 36.67%) | p 1.73 ( 63.29%) | d 0.00 ( 0.05%) |  | -0.0002 | 0.6055  | -0.0021 | -0.0024 | 0.0002  |
|     |           |         |   |       |             |                  |                 |  | 0.1961  | -0.0018 | 0.0000  | 0.1188  | 0.0073  |
|     |           |         |   |       |             |                  |                 |  | 0.0029  | 0.7617  | 0.0054  | 0.0009  | 0.0001  |
|     |           |         |   |       |             |                  |                 |  | 0.0098  | 0.0064  | 0.0016  | 0.0184  |         |
|     | ( 49.60%) | 0.7043* | C | 5     | s ( 34.19%) | p 1.92 ( 65.76%) | d 0.00 ( 0.05%) |  | 0.0000  | 0.5847  | 0.0024  | -0.0005 | 0.0000  |
|     |           |         |   |       |             |                  |                 |  | -0.1664 | -0.0103 | 0.0024  | -0.1615 | 0.0086  |
|     |           |         |   |       |             |                  |                 |  | -0.0002 | -0.7770 | -0.0013 | 0.0000  | -0.0001 |
|     |           |         |   |       |             |                  |                 |  | 0.0093  | 0.0063  | 0.0014  | 0.0199  |         |
| 10. | (1.66564) | BD ( 2) | C | 4 - C | 5           |                  |                 |  |         |         |         |         |         |
|     | ( 53.47%) | 0.7313* | C | 4     | s ( 0.01%)  | p 1.00 ( 99.97%) | d 0.00 ( 0.02%) |  | -0.0002 | -0.0074 | -0.0051 | 0.0012  | 0.0002  |
|     |           |         |   |       |             |                  |                 |  | 0.5662  | -0.0040 | -0.0069 | 0.7814  | -0.0019 |
|     |           |         |   |       |             |                  |                 |  | -0.0052 | -0.2617 | 0.0052  | 0.0035  | 0.0036  |
|     |           |         |   |       |             |                  |                 |  | 0.0068  | 0.0089  | -0.0036 | -0.0072 |         |
|     | ( 46.53%) | 0.6821* | C | 5     | s ( 0.00%)  | p 1.00 ( 99.95%) | d 0.00 ( 0.05%) |  | 0.0000  | -0.0033 | -0.0047 | 0.0017  | 0.0001  |
|     |           |         |   |       |             |                  |                 |  | 0.5493  | -0.0052 | -0.0024 | 0.7857  | -0.0081 |
|     |           |         |   |       |             |                  |                 |  | -0.0027 | -0.2835 | 0.0007  | -0.0017 | -0.0075 |
|     |           |         |   |       |             |                  |                 |  | -0.0073 | -0.0147 | -0.0077 | 0.0082  |         |
| 11. | (1.98185) | BD ( 1) | C | 4 - N | 9           |                  |                 |  |         |         |         |         |         |
|     | ( 37.66%) | 0.6136* | C | 4     | s ( 26.55%) | p 2.76 ( 73.39%) | d 0.00 ( 0.06%) |  | -0.0002 | 0.5151  | 0.0074  | 0.0066  | -0.0005 |
|     |           |         |   |       |             |                  |                 |  | 0.5066  | 0.0050  | 0.0081  | -0.5159 | -0.0055 |
|     |           |         |   |       |             |                  |                 |  | -0.0090 | -0.4593 | 0.0016  | -0.0076 | -0.0161 |
|     |           |         |   |       |             |                  |                 |  | -0.0134 | 0.0140  | 0.0008  | -0.0009 |         |
|     | ( 62.34%) | 0.7896* | N | 9     | s ( 34.35%) | p 1.91 ( 65.61%) | d 0.00 ( 0.04%) |  | -0.0001 | 0.5861  | 0.0014  | -0.0018 | -0.0002 |
|     |           |         |   |       |             |                  |                 |  | -0.5033 | -0.0022 | 0.0070  | 0.4858  | 0.0043  |
|     |           |         |   |       |             |                  |                 |  | -0.0067 | 0.4082  | -0.0003 | -0.0048 | -0.0105 |



-0.0123 0.0112 -0.0002 -0.0016  
 12. (1.97300) BD ( 1) C 5 - C 6  
 ( 50.49%) 0.7106\* C 5 s( 33.92%)p 1.95( 66.03%)d 0.00( 0.05%)  
 -0.0001 0.5823 0.0106 0.0031 0.0001  
 -0.4752 -0.0025 -0.0010 0.4927 -0.0003  
 0.0048 0.4376 -0.0094 0.0090 -0.0150  
 -0.0100 0.0120 0.0004 -0.0013  
 ( 49.51%) 0.7036\* C 6 s( 35.81%)p 1.79( 64.13%)d 0.00( 0.06%)  
 0.0001 0.5984 -0.0016 -0.0044 -0.0001  
 0.4925 0.0164 -0.0051 -0.4866 -0.0112  
 0.0066 -0.4018 0.0051 0.0076 -0.0168  
 -0.0117 0.0137 0.0007 -0.0004  
 13. (1.96978) BD ( 1) C 5 - C 51  
 ( 50.02%) 0.7072\* C 5 s( 31.86%)p 2.14( 68.11%)d 0.00( 0.03%)  
 -0.0001 0.5644 -0.0069 -0.0033 0.0000  
 0.6662 0.0130 -0.0046 -0.3364 -0.0053  
 0.0026 0.3517 0.0096 -0.0018 -0.0105  
 0.0103 -0.0041 0.0084 -0.0036  
 ( 49.98%) 0.7070\* C 51 s( 26.67%)p 2.75( 73.28%)d 0.00( 0.06%)  
 0.0001 0.5164 0.0015 -0.0019 -0.0002  
 -0.7022 0.0010 0.0024 0.3264 -0.0035  
 0.0000 -0.3649 -0.0009 0.0026 -0.0128  
 0.0144 -0.0069 0.0104 -0.0054  
 14. (1.98099) BD ( 1) C 6 - C 7  
 ( 50.22%) 0.7086\* C 6 s( 36.09%)p 1.77( 63.85%)d 0.00( 0.05%)  
 0.0000 0.6006 0.0147 0.0044 0.0001  
 -0.6446 -0.0175 -0.0032 0.3477 0.0183  
 0.0066 -0.3178 0.0155 0.0120 -0.0115  
 0.0161 -0.0067 0.0089 -0.0006  
 ( 49.78%) 0.7056\* C 7 s( 35.95%)p 1.78( 63.98%)d 0.00( 0.07%)  
 0.0000 0.5996 0.0077 -0.0016 -0.0001  
 0.6232 0.0103 -0.0093 -0.3357 0.0025  
 0.0091 0.3708 0.0309 0.0057 -0.0182  
 0.0120 -0.0058 0.0096 -0.0073  
 15. (1.67366) BD ( 2) C 6 - C 7  
 ( 51.04%) 0.7144\* C 6 s( 0.00%)p 1.00( 99.98%)d 0.00( 0.02%)  
 0.0000 0.0015 -0.0002 0.0006 0.0001  
 0.5570 -0.0058 0.0136 0.7859 -0.0076  
 0.0176 -0.2669 0.0028 -0.0054 -0.0053  
 -0.0049 -0.0103 -0.0058 0.0060  
 ( 48.96%) 0.6997\* C 7 s( 0.00%)p 1.00( 99.97%)d 0.00( 0.03%)  
 0.0000 0.0039 0.0000 0.0013 0.0001  
 0.5698 -0.0063 0.0060 0.7800 -0.0074  
 0.0096 -0.2578 0.0028 -0.0028 0.0044  
 -0.0034 0.0027 0.0148 0.0002  
 16. (1.97545) BD ( 1) C 6 - H 78  
 ( 60.76%) 0.7795\* C 6 s( 28.07%)p 2.56( 71.90%)d 0.00( 0.04%)  
 -0.0004 0.5297 -0.0109 -0.0003 0.0001  
 0.1735 -0.0082 -0.0044 0.1530 0.0002  
 -0.0007 0.8155 -0.0142 -0.0126 0.0010  
 0.0071 0.0057 0.0003 0.0168  
 ( 39.24%) 0.6264\* H 78 s( 99.95%)p 0.00( 0.05%)  
 0.9997 0.0022 0.0013 -0.0050 -0.0040  
 -0.0222  
 17. (1.98085) BD ( 1) C 7 - C 8  
 ( 49.96%) 0.7069\* C 7 s( 36.04%)p 1.77( 63.89%)d 0.00( 0.06%)  
 0.0000 0.6003 0.0063 -0.0024 -0.0002  
 -0.1853 -0.0243 -0.0055 -0.1213 0.0118  
 0.0094 -0.7672 -0.0174 0.0095 -0.0005  
 0.0050 0.0105 -0.0005 0.0226  
 ( 50.04%) 0.7074\* C 8 s( 35.83%)p 1.79( 64.12%)d 0.00( 0.05%)  
 0.0000 0.5984 0.0139 0.0046 0.0002  
 0.1372 -0.0176 -0.0093 0.1417 0.0186  
 0.0098 0.7754 0.0163 0.0012 -0.0001  
 0.0115 0.0031 0.0019 0.0191  
 18. (1.97757) BD ( 1) C 7 - H 77  
 ( 60.84%) 0.7800\* C 7 s( 27.95%)p 2.58( 72.01%)d 0.00( 0.03%)  
 0.0004 -0.5286 0.0118 -0.0036 -0.0003  
 0.5010 -0.0133 0.0018 -0.5131 0.0144  
 -0.0026 -0.4530 0.0128 -0.0024 0.0076  
 0.0127 -0.0092 0.0020 0.0041

( 39.16%) 0.6258\* H 77 s( 99.95%)p 0.00( 0.05%)  
-0.9997 -0.0015 -0.0005 -0.0136 0.0141  
0.0123

19. (1.97490) BD ( 1) C 8 - H 76  
( 61.08%) 0.7816\* C 8 s( 28.24%)p 2.54( 71.73%)d 0.00( 0.04%)  
0.0004 -0.5313 0.0108 0.0006 -0.0001  
0.6628 -0.0102 -0.0096 -0.3826 0.0062  
0.0030 0.3622 -0.0106 -0.0065 0.0115  
-0.0112 0.0063 -0.0070 0.0039  
( 38.92%) 0.6238\* H 76 s( 99.95%)p 0.00( 0.05%)  
-0.9997 0.0020 -0.0015 -0.0184 0.0096  
-0.0106

20. (1.97311) BD ( 1) N 9 - C 10  
( 62.47%) 0.7904\* N 9 s( 33.77%)p 1.96( 66.17%)d 0.00( 0.05%)  
0.0001 -0.5812 0.0006 -0.0005 -0.0001  
0.1567 -0.0128 0.0030 0.7937 -0.0065  
-0.0042 0.0829 0.0075 -0.0023 -0.0033  
0.0015 -0.0045 0.0191 0.0116  
( 37.53%) 0.6126\* C 10 s( 26.30%)p 2.80( 73.64%)d 0.00( 0.06%)  
0.0004 -0.5123 -0.0205 -0.0092 0.0005  
-0.0496 0.0115 0.0041 -0.8485 -0.0207  
-0.0158 -0.1141 -0.0057 -0.0065 -0.0078  
0.0005 -0.0007 0.0195 0.0135

21. (1.85857) BD ( 2) N 9 - C 10  
( 76.19%) 0.8729\* N 9 s( 0.08%)p99.99( 99.90%)d 0.16( 0.01%)  
-0.0001 -0.0286 0.0055 -0.0002 0.0000  
0.4677 0.0066 0.0033 -0.2030 -0.0001  
-0.0017 0.8596 0.0076 0.0085 -0.0057  
0.0023 -0.0086 0.0003 -0.0047  
( 23.81%) 0.4879\* C 10 s( 0.09%)p99.99( 99.74%)d 1.76( 0.17%)  
0.0003 0.0299 0.0060 -0.0037 0.0003  
0.4290 -0.0003 0.0060 -0.1623 -0.0095  
0.0087 0.8865 0.0299 -0.0064 0.0161  
0.0117 0.0336 0.0113 0.0020

22. (1.97621) BD ( 1) N 9 - C 13  
( 61.98%) 0.7873\* N 9 s( 31.75%)p 2.15( 68.20%)d 0.00( 0.05%)  
-0.0001 0.5634 -0.0047 0.0013 0.0001  
0.7088 -0.0056 -0.0011 0.3030 -0.0236  
0.0050 -0.2953 0.0059 -0.0005 0.0098  
-0.0129 -0.0026 0.0134 -0.0081  
( 38.02%) 0.6166\* C 13 s( 28.26%)p 2.54( 71.68%)d 0.00( 0.05%)  
-0.0001 0.5316 0.0032 0.0003 -0.0016  
-0.7547 -0.0287 -0.0054 -0.1846 0.0096  
0.0080 0.3346 0.0139 -0.0005 0.0120  
-0.0141 -0.0041 0.0101 -0.0092

23. (1.97446) BD ( 1) C 10 - N 11  
( 37.53%) 0.6126\* C 10 s( 26.68%)p 2.75( 73.25%)d 0.00( 0.07%)  
0.0003 -0.5161 -0.0213 -0.0043 -0.0005  
-0.6918 -0.0103 -0.0069 0.2967 0.0190  
0.0109 0.4064 0.0119 0.0035 0.0066  
0.0197 -0.0043 -0.0148 0.0043  
( 62.47%) 0.7904\* N 11 s( 34.03%)p 1.94( 65.91%)d 0.00( 0.05%)  
0.0001 -0.5834 0.0016 0.0010 -0.0001  
0.7080 -0.0084 -0.0014 -0.1705 -0.0128  
0.0062 -0.3585 0.0042 0.0015 0.0095  
0.0166 -0.0055 -0.0109 0.0048

24. (1.96616) BD ( 1) C 10 - B 14  
( 66.78%) 0.8172\* C 10 s( 46.95%)p 1.13( 53.05%)d 0.00( 0.01%)  
0.0001 -0.6850 0.0155 0.0068 0.0001  
0.5768 -0.0305 -0.0040 0.4040 -0.0161  
-0.0044 -0.1823 0.0052 0.0044 -0.0050  
0.0025 -0.0008 -0.0025 0.0069  
( 33.22%) 0.5763\* B 14 s( 40.37%)p 1.48( 59.58%)d 0.00( 0.05%)  
0.0004 -0.6352 0.0007 -0.0122 -0.0023  
-0.6817 -0.0097 -0.0209 -0.3609 -0.0041  
-0.0118 0.0061 -0.0050 -0.0015 -0.0169  
0.0041 0.0030 -0.0093 0.0109

25. (1.97540) BD ( 1) N 11 - C 12  
( 61.97%) 0.7872\* N 11 s( 31.51%)p 2.17( 68.44%)d 0.00( 0.05%)  
-0.0001 0.5613 -0.0035 -0.0002 0.0001  
0.5370 -0.0192 0.0027 0.6123 -0.0020

-0.0030 -0.1432 0.0151 -0.0031 0.0183  
 -0.0038 -0.0031 -0.0049 -0.0122  
 ( 38.03%) 0.6167\* C 12 s( 28.22%)p 2.54( 71.71%)d 0.00( 0.06%)  
 -0.0001 0.5312 0.0034 0.0015 -0.0012  
 -0.4570 -0.0049 0.0039 -0.7044 -0.0333  
 -0.0062 0.1045 -0.0039 -0.0063 0.0193  
 -0.0078 -0.0050 -0.0033 -0.0130

26. (1.98143) BD ( 1) N 11 - C 41  
 ( 62.37%) 0.7897\* N 11 s( 34.36%)p 1.91( 65.60%)d 0.00( 0.04%)  
 -0.0001 0.5862 0.0010 0.0012 -0.0002  
 0.2057 0.0034 -0.0033 -0.7610 -0.0028  
 0.0091 -0.1858 -0.0035 0.0033 -0.0086  
 -0.0031 0.0054 -0.0132 -0.0101  
 ( 37.63%) 0.6135\* C 41 s( 26.52%)p 2.77( 73.36%)d 0.00( 0.12%)  
 -0.0002 0.5149 0.0047 0.0051 -0.0006  
 -0.2723 -0.0053 0.0002 0.7932 -0.0014  
 0.0077 0.1726 -0.0195 0.0063 -0.0216  
 0.0013 -0.0086 -0.0195 -0.0170

27. (1.60454) BD ( 2) N 11 - C 41  
 ( 98.46%) 0.9923\* N 11 s( 0.05%)p 99.99( 99.95%)d 0.07( 0.00%)  
 -0.0002 -0.0219 0.0041 0.0000 0.0000  
 0.4088 0.0051 0.0039 -0.1270 0.0003  
 -0.0017 0.9034 0.0040 0.0089 0.0025  
 0.0014 0.0047 0.0000 0.0026  
 ( 1.54%) 0.1241\* C 41 s( 1.14%)p 58.44( 66.45%)d 28.50( 32.41%)  
 0.0006 0.0261 0.0961 0.0380 0.0044  
 0.2042 0.1381 -0.0950 -0.0584 -0.0396  
 0.0642 0.6365 0.4107 -0.1088 0.2537  
 -0.0832 0.4746 0.0335 0.1627

28. (1.97682) BD ( 1) C 12 - C 13  
 ( 49.99%) 0.7070\* C 12 s( 37.54%)p 1.66( 62.40%)d 0.00( 0.05%)  
 0.0000 0.6126 0.0104 0.0031 0.0006  
 -0.2903 0.0129 0.0145 0.6870 0.0316  
 0.0095 0.2575 -0.0015 -0.0065 -0.0138  
 -0.0098 0.0116 -0.0063 -0.0088  
 ( 50.01%) 0.7072\* C 13 s( 37.53%)p 1.66( 62.42%)d 0.00( 0.05%)  
 0.0000 0.6125 0.0100 0.0033 0.0007  
 0.4344 0.0312 0.0123 -0.5810 0.0004  
 0.0120 -0.3106 -0.0146 -0.0068 -0.0117  
 -0.0077 0.0113 -0.0105 -0.0100

29. (1.91018) BD ( 2) C 12 - C 13  
 ( 50.00%) 0.7071\* C 12 s( 0.00%)p 1.00( 99.94%)d 0.00( 0.06%)  
 0.0000 -0.0008 -0.0050 0.0014 0.0001  
 0.4327 -0.0088 -0.0005 -0.1495 0.0032  
 0.0009 0.8884 -0.0214 0.0006 0.0094  
 -0.0085 0.0127 -0.0041 0.0156  
 ( 50.00%) 0.7071\* C 13 s( 0.00%)p 1.00( 99.94%)d 0.00( 0.06%)  
 0.0000 0.0009 -0.0060 0.0030 0.0001  
 0.4317 -0.0092 0.0002 -0.1515 0.0050  
 -0.0009 0.8886 -0.0207 -0.0004 -0.0107  
 0.0030 -0.0186 0.0000 -0.0108

30. (1.97879) BD ( 1) C 12 - H 71  
 ( 61.95%) 0.7871\* C 12 s( 34.17%)p 1.93( 65.81%)d 0.00( 0.02%)  
 -0.0003 0.5845 -0.0079 -0.0037 0.0002  
 0.7203 -0.0114 0.0016 -0.0807 0.0051  
 0.0116 -0.3639 0.0070 0.0004 -0.0028  
 -0.0105 0.0017 0.0096 -0.0034  
 ( 38.05%) 0.6168\* H 71 s( 99.93%)p 0.00( 0.07%)  
 0.9997 0.0018 0.0002 -0.0228 0.0029  
 0.0117

31. (1.97878) BD ( 1) C 13 - H 72  
 ( 61.94%) 0.7870\* C 13 s( 34.15%)p 1.93( 65.83%)d 0.00( 0.02%)  
 -0.0003 0.5843 -0.0076 -0.0032 0.0005  
 0.2301 -0.0005 0.0092 0.7776 -0.0141  
 -0.0024 0.0202 -0.0012 -0.0069 0.0068  
 -0.0005 0.0012 -0.0107 -0.0079  
 ( 38.06%) 0.6169\* H 72 s( 99.93%)p 0.00( 0.07%)  
 0.9997 0.0018 0.0003 -0.0071 -0.0249  
 -0.0005

32. (1.82710) BD ( 1) B 14 - B 15  
 ( 50.00%) 0.7071\* B 14 s( 41.46%)p 1.41( 58.51%)d 0.00( 0.02%)

|     |           |         |             |                                         |         |         |         |         |         |
|-----|-----------|---------|-------------|-----------------------------------------|---------|---------|---------|---------|---------|
|     |           |         |             |                                         | 0.0003  | 0.6439  | 0.0009  | -0.0079 | -0.0014 |
|     |           |         |             |                                         | -0.3842 | -0.0057 | 0.0086  | -0.3996 | 0.0034  |
|     |           |         |             |                                         | 0.0018  | 0.5269  | -0.0074 | 0.0050  | 0.0076  |
|     |           |         |             |                                         | 0.0007  | 0.0047  | 0.0094  | -0.0089 |         |
|     | ( 50.00%) | 0.7071* | B 15        | s( 35.85%)p 1.79( 64.13%)d 0.00( 0.02%) | 0.0005  | 0.5986  | 0.0042  | -0.0098 | -0.0020 |
|     |           |         |             |                                         | 0.7256  | -0.0099 | -0.0112 | 0.1869  | -0.0087 |
|     |           |         |             |                                         | -0.0056 | 0.2817  | 0.0076  | 0.0063  | 0.0093  |
|     |           |         |             |                                         | -0.0066 | -0.0034 | 0.0077  | -0.0060 |         |
| 33. | (1.95720) | BD ( 1) | B 15 - C 16 |                                         |         |         |         |         |         |
|     | ( 33.95%) | 0.5827* | B 15        | s( 37.77%)p 1.65( 62.19%)d 0.00( 0.04%) | -0.0012 | 0.6145  | 0.0018  | 0.0069  | 0.0010  |
|     |           |         |             |                                         | -0.5565 | 0.0034  | -0.0173 | -0.3990 | 0.0015  |
|     |           |         |             |                                         | -0.0123 | 0.3904  | 0.0032  | 0.0120  | 0.0138  |
|     |           |         |             |                                         | -0.0106 | -0.0073 | 0.0053  | -0.0034 |         |
|     | ( 66.05%) | 0.8127* | C 16        | s( 46.89%)p 1.13( 53.11%)d 0.00( 0.01%) | 0.0000  | 0.6845  | -0.0171 | -0.0050 | 0.0001  |
|     |           |         |             |                                         | 0.5370  | -0.0245 | -0.0049 | 0.4029  | -0.0194 |
|     |           |         |             |                                         | -0.0035 | -0.2812 | 0.0163  | 0.0008  | 0.0037  |
|     |           |         |             |                                         | -0.0034 | -0.0045 | 0.0027  | -0.0010 |         |
| 34. | (1.97511) | BD ( 1) | C 16 - N 17 |                                         |         |         |         |         |         |
|     | ( 37.05%) | 0.6087* | C 16        | s( 26.30%)p 2.80( 73.63%)d 0.00( 0.07%) | -0.0004 | 0.5122  | 0.0236  | 0.0037  | -0.0003 |
|     |           |         |             |                                         | -0.8032 | -0.0162 | -0.0108 | -0.0083 | 0.0092  |
|     |           |         |             |                                         | 0.0049  | -0.3003 | -0.0176 | -0.0091 | 0.0067  |
|     |           |         |             |                                         | 0.0107  | 0.0011  | 0.0214  | -0.0115 |         |
|     | ( 62.95%) | 0.7934* | N 17        | s( 34.38%)p 1.91( 65.56%)d 0.00( 0.06%) | -0.0001 | 0.5864  | -0.0022 | -0.0015 | 0.0001  |
|     |           |         |             |                                         | 0.7863  | -0.0066 | -0.0019 | 0.0549  | -0.0116 |
|     |           |         |             |                                         | 0.0031  | 0.1846  | 0.0087  | -0.0045 | 0.0012  |
|     |           |         |             |                                         | 0.0131  | -0.0012 | 0.0179  | -0.0081 |         |
| 35. | (1.85625) | BD ( 2) | C 16 - N 17 |                                         |         |         |         |         |         |
|     | ( 25.94%) | 0.5093* | C 16        | s( 0.07%)p99.99( 99.77%)d 2.47( 0.16%)  | 0.0001  | 0.0253  | 0.0036  | -0.0009 | 0.0004  |
|     |           |         |             |                                         | -0.2338 | -0.0032 | -0.0016 | 0.7218  | 0.0263  |
|     |           |         |             |                                         | -0.0108 | 0.6489  | 0.0149  | -0.0030 | -0.0258 |
|     |           |         |             |                                         | -0.0251 | -0.0090 | 0.0145  | -0.0061 |         |
|     | ( 74.06%) | 0.8606* | N 17        | s( 0.02%)p99.99( 99.96%)d 0.83( 0.02%)  | 0.0000  | -0.0143 | 0.0040  | -0.0006 | 0.0000  |
|     |           |         |             |                                         | -0.1986 | -0.0038 | -0.0022 | 0.7039  | 0.0040  |
|     |           |         |             |                                         | 0.0076  | 0.6816  | 0.0057  | 0.0065  | 0.0077  |
|     |           |         |             |                                         | 0.0049  | 0.0034  | 0.0004  | 0.0094  |         |
| 36. | (1.97558) | BD ( 1) | C 16 - N 20 |                                         |         |         |         |         |         |
|     | ( 37.02%) | 0.6085* | C 16        | s( 26.80%)p 2.73( 73.13%)d 0.00( 0.07%) | -0.0003 | 0.5170  | 0.0259  | 0.0042  | -0.0001 |
|     |           |         |             |                                         | 0.0963  | 0.0178  | 0.0088  | -0.5605 | -0.0103 |
|     |           |         |             |                                         | -0.0076 | 0.6379  | 0.0143  | 0.0130  | 0.0019  |
|     |           |         |             |                                         | -0.0022 | -0.0231 | -0.0113 | 0.0068  |         |
|     | ( 62.98%) | 0.7936* | N 20        | s( 34.60%)p 1.89( 65.35%)d 0.00( 0.05%) | -0.0001 | 0.5882  | -0.0036 | -0.0020 | 0.0001  |
|     |           |         |             |                                         | 0.0229  | -0.0153 | 0.0047  | 0.5448  | -0.0081 |
|     |           |         |             |                                         | -0.0012 | -0.5965 | 0.0009  | 0.0033  | -0.0013 |
|     |           |         |             |                                         | 0.0028  | -0.0204 | -0.0079 | 0.0071  |         |
| 37. | (1.97731) | BD ( 1) | N 17 - C 18 |                                         |         |         |         |         |         |
|     | ( 61.94%) | 0.7870* | N 17        | s( 31.37%)p 2.19( 68.57%)d 0.00( 0.05%) | -0.0001 | 0.5601  | -0.0057 | 0.0000  | 0.0001  |
|     |           |         |             |                                         | -0.4787 | 0.0226  | -0.0035 | -0.5294 | 0.0078  |
|     |           |         |             |                                         | 0.0015  | 0.4191  | 0.0062  | -0.0032 | 0.0129  |
|     |           |         |             |                                         | -0.0110 | -0.0158 | -0.0027 | -0.0006 |         |
|     | ( 38.06%) | 0.6169* | C 18        | s( 28.59%)p 2.50( 71.35%)d 0.00( 0.07%) | -0.0001 | 0.5346  | 0.0044  | 0.0015  | -0.0011 |
|     |           |         |             |                                         | 0.3761  | -0.0019 | -0.0064 | 0.5764  | 0.0225  |
|     |           |         |             |                                         | 0.0011  | -0.4884 | -0.0260 | -0.0067 | 0.0166  |
|     |           |         |             |                                         | -0.0107 | -0.0163 | 0.0000  | -0.0038 |         |
| 38. | (1.98138) | BD ( 1) | N 17 - C 21 |                                         |         |         |         |         |         |
|     | ( 63.11%) | 0.7944* | N 17        | s( 34.18%)p 1.92( 65.78%)d 0.00( 0.03%) | -0.0001 | 0.5846  | 0.0029  | 0.0013  | -0.0001 |
|     |           |         |             |                                         | -0.3348 | -0.0051 | 0.0045  | 0.4695  | 0.0027  |
|     |           |         |             |                                         | -0.0052 | -0.5702 | -0.0066 | 0.0070  | -0.0074 |
|     |           |         |             |                                         | 0.0091  | -0.0141 | -0.0023 | 0.0024  |         |
|     | ( 36.89%) | 0.6074* | C 21        | s( 25.90%)p 2.86( 74.02%)d 0.00( 0.07%) |         |         |         |         |         |

|     |           |           |        |    |             |                  |                 |         |         |
|-----|-----------|-----------|--------|----|-------------|------------------|-----------------|---------|---------|
|     |           |           |        |    | -0.0002     | 0.5088           | 0.0080          | 0.0075  | -0.0006 |
|     |           |           |        |    | 0.3843      | 0.0033           | 0.0051          | -0.5020 | 0.0002  |
|     |           |           |        |    | -0.0066     | 0.5834           | 0.0058          | 0.0075  | -0.0121 |
|     |           |           |        |    | 0.0132      | -0.0184          | -0.0049         | 0.0059  |         |
| 39. | (1.97697) | BD ( 1) C | 18 - C | 19 |             |                  |                 |         |         |
|     | ( 49.97%) | 0.7069*   | C      | 18 | s ( 37.04%) | p 1.70 ( 62.91%) | d 0.00 ( 0.05%) |         |         |
|     |           |           |        |    | 0.0000      | -0.6085          | -0.0095         | -0.0027 | -0.0007 |
|     |           |           |        |    | -0.4291     | 0.0111           | 0.0143          | 0.3778  | 0.0241  |
|     |           |           |        |    | 0.0094      | -0.5484          | -0.0219         | -0.0041 | 0.0081  |
|     |           |           |        |    | -0.0167     | 0.0116           | -0.0080         | -0.0012 |         |
|     | ( 50.03%) | 0.7073*   | C      | 19 | s ( 37.19%) | p 1.69 ( 62.76%) | d 0.00 ( 0.05%) |         |         |
|     |           |           |        |    | 0.0000      | -0.6097          | -0.0092         | -0.0028 | -0.0006 |
|     |           |           |        |    | 0.5697      | 0.0334           | 0.0103          | -0.2598 | 0.0086  |
|     |           |           |        |    | 0.0130      | 0.4838           | 0.0013          | -0.0070 | 0.0083  |
|     |           |           |        |    | -0.0153     | 0.0146           | -0.0040         | -0.0036 |         |
| 40. | (1.87142) | BD ( 2) C | 18 - C | 19 |             |                  |                 |         |         |
|     | ( 49.67%) | 0.7047*   | C      | 18 | s ( 0.00%)  | p 1.00 ( 99.94%) | d 0.00 ( 0.06%) |         |         |
|     |           |           |        |    | 0.0000      | 0.0007           | -0.0023         | 0.0012  | 0.0001  |
|     |           |           |        |    | -0.2259     | 0.0043           | 0.0000          | 0.7106  | -0.0159 |
|     |           |           |        |    | 0.0003      | 0.6655           | -0.0144         | 0.0008  | 0.0156  |
|     |           |           |        |    | 0.0102      | 0.0056           | -0.0009         | 0.0149  |         |
|     | ( 50.33%) | 0.7095*   | C      | 19 | s ( 0.00%)  | p 1.00 ( 99.94%) | d 0.00 ( 0.06%) |         |         |
|     |           |           |        |    | 0.0000      | 0.0027           | -0.0028         | 0.0019  | 0.0001  |
|     |           |           |        |    | -0.2352     | 0.0051           | -0.0005         | 0.7109  | -0.0170 |
|     |           |           |        |    | 0.0014      | 0.6620           | -0.0139         | 0.0000  | -0.0099 |
|     |           |           |        |    | -0.0021     | -0.0036          | -0.0074         | -0.0203 |         |
| 41. | (1.97977) | BD ( 1) C | 18 - H | 63 |             |                  |                 |         |         |
|     | ( 62.20%) | 0.7886*   | C      | 18 | s ( 34.32%) | p 1.91 ( 65.66%) | d 0.00 ( 0.02%) |         |         |
|     |           |           |        |    | 0.0003      | -0.5857          | 0.0077          | 0.0033  | -0.0002 |
|     |           |           |        |    | 0.7890      | -0.0146          | 0.0005          | 0.1341  | -0.0003 |
|     |           |           |        |    | 0.0085      | 0.1252           | -0.0058         | -0.0082 | -0.0036 |
|     |           |           |        |    | -0.0043     | 0.0000           | -0.0120         | 0.0068  |         |
|     | ( 37.80%) | 0.6148*   | H      | 63 | s ( 99.93%) | p 0.00 ( 0.07%)  |                 |         |         |
|     |           |           |        |    | -0.9997     | -0.0018          | -0.0002         | -0.0252 | -0.0037 |
|     |           |           |        |    | -0.0045     |                  |                 |         |         |
| 42. | (1.97686) | BD ( 1) C | 19 - N | 20 |             |                  |                 |         |         |
|     | ( 37.98%) | 0.6163*   | C      | 19 | s ( 28.42%) | p 2.52 ( 71.51%) | d 0.00 ( 0.07%) |         |         |
|     |           |           |        |    | -0.0001     | 0.5331           | 0.0043          | 0.0013  | -0.0012 |
|     |           |           |        |    | 0.7774      | 0.0331           | 0.0053          | 0.3228  | 0.0004  |
|     |           |           |        |    | -0.0070     | -0.0726          | 0.0095          | 0.0051  | 0.0178  |
|     |           |           |        |    | -0.0061     | -0.0073          | 0.0116          | -0.0109 |         |
|     | ( 62.02%) | 0.7875*   | N      | 20 | s ( 31.27%) | p 2.20 ( 68.68%) | d 0.00 ( 0.05%) |         |         |
|     |           |           |        |    | -0.0001     | 0.5592           | -0.0037         | 0.0003  | 0.0001  |
|     |           |           |        |    | -0.7108     | 0.0036           | 0.0032          | -0.3916 | 0.0201  |
|     |           |           |        |    | -0.0033     | 0.1659           | -0.0141         | 0.0029  | 0.0148  |
|     |           |           |        |    | -0.0045     | -0.0036          | 0.0134          | -0.0104 |         |
| 43. | (1.98034) | BD ( 1) C | 19 - H | 64 |             |                  |                 |         |         |
|     | ( 62.13%) | 0.7882*   | C      | 19 | s ( 34.33%) | p 1.91 ( 65.65%) | d 0.00 ( 0.02%) |         |         |
|     |           |           |        |    | 0.0003      | -0.5858          | 0.0073          | 0.0033  | -0.0002 |
|     |           |           |        |    | 0.1129      | 0.0021           | 0.0106          | 0.5674  | -0.0108 |
|     |           |           |        |    | 0.0028      | -0.5669          | 0.0110          | 0.0037  | -0.0022 |
|     |           |           |        |    | 0.0018      | 0.0130           | 0.0057          | -0.0036 |         |
|     | ( 37.87%) | 0.6154*   | H      | 64 | s ( 99.93%) | p 0.00 ( 0.07%)  |                 |         |         |
|     |           |           |        |    | -0.9997     | -0.0019          | -0.0002         | -0.0030 | -0.0183 |
|     |           |           |        |    | 0.0182      |                  |                 |         |         |
| 44. | (1.98185) | BD ( 1) N | 20 - C | 31 |             |                  |                 |         |         |
|     | ( 62.78%) | 0.7923*   | N      | 20 | s ( 34.08%) | p 1.93 ( 65.89%) | d 0.00 ( 0.04%) |         |         |
|     |           |           |        |    | -0.0001     | 0.5838           | 0.0027          | 0.0017  | -0.0002 |
|     |           |           |        |    | 0.6545      | 0.0049           | -0.0078         | -0.1638 | -0.0043 |
|     |           |           |        |    | 0.0023      | 0.4511           | 0.0052          | -0.0056 | -0.0032 |
|     |           |           |        |    | 0.0152      | -0.0046          | 0.0103          | 0.0002  |         |
|     | ( 37.22%) | 0.6101*   | C      | 31 | s ( 26.18%) | p 2.82 ( 73.75%) | d 0.00 ( 0.07%) |         |         |
|     |           |           |        |    | -0.0002     | 0.5116           | 0.0082          | 0.0071  | -0.0004 |
|     |           |           |        |    | -0.6697     | -0.0030          | -0.0076         | 0.1648  | 0.0037  |
|     |           |           |        |    | 0.0014      | -0.5115          | -0.0015         | -0.0063 | -0.0069 |
|     |           |           |        |    | 0.0213      | -0.0037          | 0.0136          | 0.0005  |         |
| 45. | (1.96835) | BD ( 1) C | 21 - C | 22 |             |                  |                 |         |         |
|     | ( 50.89%) | 0.7133*   | C      | 21 | s ( 37.14%) | p 1.69 ( 62.82%) | d 0.00 ( 0.05%) |         |         |
|     |           |           |        |    | -0.0002     | 0.6094           | -0.0012         | -0.0033 | 0.0001  |
|     |           |           |        |    | 0.0162      | -0.0063          | -0.0045         | -0.2457 | 0.0018  |
|     |           |           |        |    | -0.0007     | -0.7533          | -0.0054         | 0.0006  | -0.0014 |

|     |           |         |             |                                         |         |         |         |         |         |
|-----|-----------|---------|-------------|-----------------------------------------|---------|---------|---------|---------|---------|
|     |           |         |             |                                         | 0.0002  | 0.0119  | -0.0035 | 0.0176  |         |
|     | ( 49.11%) | 0.7008* | C 22        | s( 33.53%)p 1.98( 66.42%)d 0.00( 0.06%) | 0.0000  | 0.5790  | 0.0030  | -0.0011 | 0.0000  |
|     |           |         |             |                                         | 0.0120  | -0.0097 | -0.0007 | 0.2101  | 0.0098  |
|     |           |         |             |                                         | -0.0023 | 0.7872  | 0.0007  | 0.0016  | -0.0018 |
|     |           |         |             |                                         | -0.0009 | 0.0108  | -0.0026 | 0.0206  |         |
| 46. | (1.96787) | BD ( 1) | C 21 - C 26 |                                         |         |         |         |         |         |
|     | ( 50.49%) | 0.7105* | C 21        | s( 36.89%)p 1.71( 63.07%)d 0.00( 0.05%) | -0.0002 | 0.6073  | -0.0019 | -0.0025 | 0.0002  |
|     |           |         |             |                                         | -0.3615 | -0.0084 | -0.0040 | 0.6531  | 0.0045  |
|     |           |         |             |                                         | 0.0017  | 0.2708  | -0.0021 | 0.0000  | -0.0152 |
|     |           |         |             |                                         | -0.0061 | 0.0106  | -0.0082 | -0.0049 |         |
|     | ( 49.51%) | 0.7036* | C 26        | s( 34.11%)p 1.93( 65.83%)d 0.00( 0.05%) | 0.0000  | 0.5841  | 0.0031  | -0.0005 | 0.0000  |
|     |           |         |             |                                         | 0.3858  | -0.0048 | -0.0013 | -0.6772 | -0.0003 |
|     |           |         |             |                                         | -0.0011 | -0.2253 | -0.0121 | 0.0031  | -0.0157 |
|     |           |         |             |                                         | -0.0053 | 0.0105  | -0.0099 | -0.0063 |         |
| 47. | (1.67376) | BD ( 2) | C 21 - C 26 |                                         |         |         |         |         |         |
|     | ( 53.97%) | 0.7346* | C 21        | s( 0.04%)p99.99( 99.94%)d 0.56( 0.02%)  | 0.0002  | 0.0165  | 0.0091  | -0.0003 | -0.0003 |
|     |           |         |             |                                         | 0.8489  | -0.0014 | -0.0054 | 0.5104  | -0.0067 |
|     |           |         |             |                                         | -0.0051 | -0.1348 | 0.0024  | 0.0031  | 0.0047  |
|     |           |         |             |                                         | 0.0029  | -0.0004 | -0.0130 | 0.0003  |         |
|     | ( 46.03%) | 0.6785* | C 26        | s( 0.00%)p 1.00( 99.95%)d 0.00( 0.05%)  | 0.0000  | 0.0009  | 0.0057  | -0.0020 | -0.0002 |
|     |           |         |             |                                         | 0.8387  | -0.0097 | -0.0036 | 0.5255  | -0.0027 |
|     |           |         |             |                                         | 0.0014  | -0.1409 | 0.0020  | 0.0018  | -0.0098 |
|     |           |         |             |                                         | -0.0126 | -0.0052 | 0.0135  | 0.0036  |         |
| 48. | (1.97239) | BD ( 1) | C 22 - C 23 |                                         |         |         |         |         |         |
|     | ( 50.45%) | 0.7103* | C 22        | s( 34.21%)p 1.92( 65.75%)d 0.00( 0.05%) | -0.0001 | 0.5848  | 0.0089  | 0.0043  | 0.0003  |
|     |           |         |             |                                         | -0.3818 | -0.0038 | -0.0048 | 0.4604  | 0.0050  |
|     |           |         |             |                                         | -0.0007 | -0.5473 | 0.0078  | -0.0115 | -0.0122 |
|     |           |         |             |                                         | 0.0121  | -0.0123 | -0.0026 | 0.0031  |         |
|     | ( 49.55%) | 0.7039* | C 23        | s( 35.86%)p 1.79( 64.08%)d 0.00( 0.06%) | 0.0001  | 0.5988  | -0.0004 | -0.0041 | -0.0003 |
|     |           |         |             |                                         | 0.3862  | 0.0115  | -0.0045 | -0.4769 | -0.0167 |
|     |           |         |             |                                         | 0.0050  | 0.5135  | -0.0026 | -0.0092 | -0.0134 |
|     |           |         |             |                                         | 0.0132  | -0.0150 | -0.0037 | 0.0054  |         |
| 49. | (1.63022) | BD ( 2) | C 22 - C 23 |                                         |         |         |         |         |         |
|     | ( 48.31%) | 0.6950* | C 22        | s( 0.02%)p99.99( 99.94%)d 1.71( 0.03%)  | -0.0002 | -0.0062 | -0.0128 | 0.0010  | 0.0006  |
|     |           |         |             |                                         | -0.8456 | 0.0042  | -0.0024 | -0.5105 | 0.0073  |
|     |           |         |             |                                         | 0.0028  | 0.1537  | -0.0064 | -0.0038 | -0.0065 |
|     |           |         |             |                                         | 0.0004  | 0.0033  | 0.0172  | -0.0010 |         |
|     | ( 51.69%) | 0.7190* | C 23        | s( 0.00%)p 1.00( 99.96%)d 0.00( 0.03%)  | 0.0000  | -0.0001 | -0.0045 | 0.0001  | 0.0001  |
|     |           |         |             |                                         | -0.8394 | 0.0021  | -0.0147 | -0.5229 | 0.0037  |
|     |           |         |             |                                         | -0.0117 | 0.1459  | 0.0003  | 0.0029  | 0.0013  |
|     |           |         |             |                                         | -0.0134 | -0.0097 | -0.0065 | 0.0038  |         |
| 50. | (1.96962) | BD ( 1) | C 22 - C 27 |                                         |         |         |         |         |         |
|     | ( 50.20%) | 0.7085* | C 22        | s( 32.22%)p 2.10( 67.75%)d 0.00( 0.03%) | -0.0001 | 0.5676  | -0.0058 | -0.0042 | -0.0003 |
|     |           |         |             |                                         | 0.3719  | 0.0040  | -0.0033 | -0.6945 | -0.0166 |
|     |           |         |             |                                         | 0.0064  | -0.2375 | -0.0045 | -0.0009 | -0.0117 |
|     |           |         |             |                                         | -0.0025 | 0.0067  | -0.0096 | -0.0059 |         |
|     | ( 49.80%) | 0.7057* | C 27        | s( 26.68%)p 2.75( 73.27%)d 0.00( 0.06%) | 0.0001  | 0.5165  | 0.0001  | -0.0014 | 0.0005  |
|     |           |         |             |                                         | -0.3744 | 0.0052  | 0.0001  | 0.7310  | 0.0012  |
|     |           |         |             |                                         | -0.0007 | 0.2409  | 0.0001  | -0.0030 | -0.0156 |
|     |           |         |             |                                         | -0.0057 | 0.0105  | -0.0102 | -0.0090 |         |
| 51. | (1.98062) | BD ( 1) | C 23 - C 24 |                                         |         |         |         |         |         |
|     | ( 50.11%) | 0.7079* | C 23        | s( 35.87%)p 1.79( 64.07%)d 0.00( 0.05%) | 0.0000  | 0.5988  | 0.0135  | 0.0054  | 0.0002  |
|     |           |         |             |                                         | -0.3811 | -0.0137 | -0.0036 | 0.6705  | 0.0165  |
|     |           |         |             |                                         | 0.0022  | 0.2117  | -0.0198 | -0.0137 | -0.0142 |
|     |           |         |             |                                         | -0.0065 | 0.0133  | -0.0091 | -0.0040 |         |
|     | ( 49.89%) | 0.7064* | C 24        | s( 35.96%)p 1.78( 63.97%)d 0.00( 0.07%) | 0.0000  | 0.5996  | 0.0058  | -0.0020 | -0.0002 |
|     |           |         |             |                                         | 0.3654  | 0.0027  | -0.0084 | -0.6618 | -0.0113 |
|     |           |         |             |                                         | 0.0099  | -0.2588 | -0.0295 | -0.0077 | -0.0197 |

-0.0032 0.0067 -0.0111 -0.0102  
 52. (1.97434) BD ( 1) C 23 - H 67  
 ( 61.07%) 0.7815\* C 23 s( 28.23%)p 2.54( 71.73%)d 0.00( 0.04%)  
 0.0004 -0.5312 0.0109 0.0014 -0.0001  
 0.0058 -0.0002 0.0024 0.2188 -0.0095  
 -0.0046 0.8179 -0.0147 -0.0124 0.0002  
 -0.0002 -0.0087 0.0015 -0.0168  
 ( 38.93%) 0.6239\* H 67 s( 99.94%)p 0.00( 0.06%)  
 -0.9997 0.0017 -0.0014 0.0015 -0.0058  
 -0.0227  
 53. (1.98089) BD ( 1) C 24 - C 25  
 ( 49.76%) 0.7054\* C 24 s( 35.96%)p 1.78( 63.97%)d 0.00( 0.07%)  
 0.0000 -0.5996 -0.0080 0.0020 0.0001  
 0.0142 0.0136 0.0068 -0.2360 -0.0263  
 -0.0060 -0.7633 -0.0136 0.0116 0.0014  
 -0.0031 -0.0075 0.0015 -0.0243  
 ( 50.24%) 0.7088\* C 25 s( 36.10%)p 1.77( 63.85%)d 0.00( 0.05%)  
 0.0000 -0.6007 -0.0144 -0.0044 -0.0001  
 0.0185 0.0138 0.0087 0.1930 -0.0170  
 -0.0104 0.7744 0.0202 0.0033 0.0022  
 0.0021 -0.0135 0.0033 -0.0176  
 54. (1.66929) BD ( 2) C 24 - C 25  
 ( 48.85%) 0.6989\* C 24 s( 0.00%)p 1.00( 99.97%)d 0.00( 0.03%)  
 0.0000 0.0002 0.0031 -0.0021 0.0001  
 0.8406 -0.0071 0.0095 0.5212 -0.0042  
 0.0054 -0.1457 0.0013 -0.0018 0.0007  
 0.0125 0.0084 0.0044 -0.0043  
 ( 51.15%) 0.7152\* C 25 s( 0.00%)p 1.00( 99.98%)d 0.00( 0.02%)  
 0.0001 0.0006 0.0011 -0.0012 -0.0003  
 0.8397 -0.0082 0.0181 0.5214 -0.0050  
 0.0106 -0.1495 -0.0003 -0.0033 -0.0059  
 -0.0092 -0.0038 0.0092 0.0025  
 55. (1.97747) BD ( 1) C 24 - H 66  
 ( 60.90%) 0.7804\* C 24 s( 28.03%)p 2.57( 71.94%)d 0.00( 0.03%)  
 -0.0004 0.5293 -0.0115 0.0035 0.0003  
 -0.3984 0.0123 -0.0025 0.4827 -0.0132  
 0.0020 -0.5719 0.0153 -0.0022 -0.0045  
 0.0098 -0.0143 0.0006 0.0005  
 ( 39.10%) 0.6253\* H 66 s( 99.95%)p 0.00( 0.05%)  
 0.9997 0.0014 0.0005 0.0106 -0.0132  
 0.0158  
 56. (1.97185) BD ( 1) C 25 - C 26  
 ( 49.37%) 0.7026\* C 25 s( 35.74%)p 1.80( 64.20%)d 0.00( 0.06%)  
 0.0001 0.5978 -0.0017 -0.0044 -0.0001  
 0.3694 0.0031 -0.0060 -0.4342 0.0022  
 0.0071 0.5626 0.0199 -0.0057 -0.0129  
 0.0134 -0.0148 -0.0033 0.0060  
 ( 50.63%) 0.7116\* C 26 s( 33.98%)p 1.94( 65.97%)d 0.00( 0.05%)  
 -0.0002 0.5828 0.0099 0.0029 0.0001  
 -0.3836 0.0037 -0.0077 0.4652 -0.0079  
 0.0077 -0.5441 -0.0034 0.0000 -0.0110  
 0.0119 -0.0127 -0.0023 0.0058  
 57. (1.97514) BD ( 1) C 25 - H 65  
 ( 60.81%) 0.7798\* C 25 s( 28.12%)p 2.55( 71.84%)d 0.00( 0.04%)  
 -0.0004 0.5302 -0.0105 -0.0004 0.0001  
 -0.3966 0.0066 0.0044 0.7080 -0.0112  
 -0.0105 0.2439 -0.0108 -0.0055 -0.0129  
 -0.0046 0.0083 -0.0079 -0.0066  
 ( 39.19%) 0.6260\* H 65 s( 99.95%)p 0.00( 0.05%)  
 0.9997 0.0020 0.0013 0.0105 -0.0195  
 -0.0069  
 58. (1.96965) BD ( 1) C 26 - C 29  
 ( 50.05%) 0.7075\* C 26 s( 31.88%)p 2.14( 68.09%)d 0.00( 0.03%)  
 -0.0001 0.5645 -0.0074 -0.0031 -0.0002  
 -0.0045 -0.0027 -0.0007 0.2195 0.0065  
 -0.0004 0.7952 0.0162 -0.0049 -0.0013  
 0.0000 0.0072 -0.0015 0.0161  
 ( 49.95%) 0.7068\* C 29 s( 26.68%)p 2.75( 73.27%)d 0.00( 0.06%)  
 0.0001 0.5165 0.0016 -0.0017 -0.0001  
 0.0141 0.0025 -0.0022 -0.2394 -0.0010  
 0.0018 -0.8217 0.0018 0.0030 -0.0001

-0.0005 0.0113 -0.0015 0.0206  
 59. (1.97151) BD ( 1) C 27 - C 28  
 ( 50.49%) 0.7105\* C 27 s( 25.54%)p 2.91( 74.42%)d 0.00( 0.04%)  
 -0.0001 0.5053 -0.0112 0.0022 -0.0001  
 -0.5593 0.0005 -0.0003 -0.6556 -0.0122  
 -0.0041 0.0376 0.0039 0.0008 0.0172  
 -0.0017 -0.0010 -0.0006 -0.0104  
 ( 49.51%) 0.7037\* C 28 s( 29.27%)p 2.41( 70.68%)d 0.00( 0.04%)  
 0.0004 0.5407 -0.0193 -0.0030 0.0001  
 0.5458 0.0107 -0.0077 0.6389 0.0071  
 -0.0132 -0.0176 -0.0006 0.0013 0.0179  
 -0.0005 -0.0007 -0.0031 -0.0107  
 60. (1.97918) BD ( 1) C 27 - C 62  
 ( 51.43%) 0.7172\* C 27 s( 26.93%)p 2.71( 73.03%)d 0.00( 0.04%)  
 0.0001 -0.5188 0.0115 -0.0033 0.0002  
 -0.3401 -0.0136 -0.0031 -0.0651 0.0020  
 0.0012 0.7811 -0.0053 0.0039 -0.0016  
 0.0112 0.0022 -0.0017 -0.0153  
 ( 48.57%) 0.6969\* C 62 s( 28.50%)p 2.51( 71.45%)d 0.00( 0.05%)  
 -0.0003 -0.5334 0.0218 0.0029 0.0000  
 0.3602 0.0039 -0.0095 0.0533 0.0064  
 -0.0003 -0.7625 -0.0130 0.0123 -0.0009  
 0.0153 0.0027 -0.0038 -0.0157  
 61. (1.95937) BD ( 1) C 27 - H 84  
 ( 61.62%) 0.7850\* C 27 s( 20.90%)p 3.78( 79.05%)d 0.00( 0.05%)  
 -0.0002 0.4567 0.0204 -0.0043 -0.0001  
 0.6559 -0.0047 -0.0021 -0.1755 0.0063  
 -0.0063 0.5737 -0.0132 -0.0056 -0.0050  
 0.0190 -0.0051 0.0092 0.0039  
 ( 38.38%) 0.6195\* H 84 s( 99.96%)p 0.00( 0.04%)  
 0.9998 0.0050 0.0007 -0.0169 0.0024  
 -0.0125  
 62. (1.98583) BD ( 1) C 28 - H 90  
 ( 60.77%) 0.7795\* C 28 s( 23.20%)p 3.31( 76.76%)d 0.00( 0.04%)  
 0.0002 -0.4816 -0.0056 -0.0024 -0.0001  
 -0.3911 0.0046 0.0039 0.7480 -0.0050  
 0.0078 0.2347 -0.0020 -0.0009 0.0144  
 0.0042 -0.0079 0.0098 0.0076  
 ( 39.23%) 0.6264\* H 90 s( 99.96%)p 0.00( 0.04%)  
 -0.9998 -0.0016 -0.0002 0.0112 -0.0159  
 -0.0062  
 63. (1.98733) BD ( 1) C 28 - H 91  
 ( 60.46%) 0.7776\* C 28 s( 23.87%)p 3.19( 76.08%)d 0.00( 0.05%)  
 0.0000 -0.4885 -0.0040 -0.0014 0.0001  
 0.3302 -0.0010 0.0058 0.1091 0.0013  
 0.0084 -0.7999 0.0030 0.0005 0.0004  
 0.0132 0.0049 -0.0032 -0.0169  
 ( 39.54%) 0.6288\* H 91 s( 99.96%)p 0.00( 0.04%)  
 -0.9998 -0.0016 0.0000 -0.0060 -0.0017  
 0.0197  
 64. (1.98896) BD ( 1) C 28 - H 92  
 ( 60.68%) 0.7790\* C 28 s( 23.66%)p 3.23( 76.30%)d 0.00( 0.05%)  
 0.0000 -0.4863 -0.0077 0.0005 0.0000  
 0.6627 0.0002 0.0075 -0.1397 0.0033  
 0.0065 0.5516 -0.0033 0.0004 0.0055  
 -0.0170 0.0029 -0.0109 -0.0023  
 ( 39.32%) 0.6270\* H 92 s( 99.95%)p 0.00( 0.05%)  
 -0.9998 -0.0023 -0.0002 -0.0155 0.0051  
 -0.0144  
 65. (1.97625) BD ( 1) C 29 - C 30  
 ( 50.69%) 0.7120\* C 29 s( 26.01%)p 2.84( 73.95%)d 0.00( 0.04%)  
 -0.0001 0.5098 -0.0125 0.0007 0.0000  
 -0.8057 -0.0033 -0.0026 0.0250 -0.0086  
 0.0004 0.2992 0.0115 0.0030 -0.0012  
 -0.0098 0.0003 0.0155 -0.0063  
 ( 49.31%) 0.7022\* C 30 s( 29.30%)p 2.41( 70.65%)d 0.00( 0.05%)  
 0.0003 0.5410 -0.0190 -0.0027 0.0001  
 0.7841 0.0125 -0.0134 -0.0260 -0.0014  
 -0.0007 -0.3011 -0.0002 0.0070 -0.0006  
 -0.0124 0.0001 0.0161 -0.0065  
 66. (1.97478) BD ( 1) C 29 - C 61



|     |           |         |         |    |                                         |  |  |  |  |
|-----|-----------|---------|---------|----|-----------------------------------------|--|--|--|--|
|     | ( 51.28%) | 0.7161* | C       | 29 | s( 26.46%)p 2.78( 73.50%)d 0.00( 0.04%) |  |  |  |  |
|     |           |         |         |    | -0.0001 0.5143 -0.0111 0.0012 0.0001    |  |  |  |  |
|     |           |         |         |    | 0.3898 0.0116 0.0009 0.7555 -0.0018     |  |  |  |  |
|     |           |         |         |    | 0.0055 0.1098 0.0075 0.0042 0.0130      |  |  |  |  |
|     |           |         |         |    | 0.0013 0.0030 -0.0098 -0.0089           |  |  |  |  |
|     | ( 48.72%) | 0.6980* | C       | 61 | s( 28.85%)p 2.46( 71.10%)d 0.00( 0.05%) |  |  |  |  |
|     |           |         |         |    | 0.0003 0.5370 -0.0135 0.0007 -0.0005    |  |  |  |  |
|     |           |         |         |    | -0.3908 -0.0054 0.0080 -0.7377 -0.0078  |  |  |  |  |
|     |           |         |         |    | 0.0073 -0.1179 0.0041 0.0017 0.0154     |  |  |  |  |
|     |           |         |         |    | 0.0026 0.0043 -0.0098 -0.0100           |  |  |  |  |
| 67. | (1.96477) |         | BD ( 1) | C  | 29 - H 83                               |  |  |  |  |
|     | ( 61.05%) | 0.7813* | C       | 29 | s( 20.90%)p 3.78( 79.05%)d 0.00( 0.05%) |  |  |  |  |
|     |           |         |         |    | -0.0002 0.4567 0.0201 -0.0004 0.0001    |  |  |  |  |
|     |           |         |         |    | 0.4447 -0.0057 -0.0051 -0.6083 0.0122   |  |  |  |  |
|     |           |         |         |    | 0.0052 0.4717 -0.0062 0.0050 -0.0137    |  |  |  |  |
|     |           |         |         |    | 0.0105 -0.0147 -0.0046 -0.0018          |  |  |  |  |
|     | ( 38.95%) | 0.6241* | H       | 83 | s( 99.96%)p 0.00( 0.04%)                |  |  |  |  |
|     |           |         |         |    | 0.9998 0.0054 0.0001 -0.0113 0.0145     |  |  |  |  |
|     |           |         |         |    | -0.0104                                 |  |  |  |  |
| 68. | (1.98638) |         | BD ( 1) | C  | 30 - H 93                               |  |  |  |  |
|     | ( 60.74%) | 0.7794* | C       | 30 | s( 23.29%)p 3.29( 76.67%)d 0.00( 0.04%) |  |  |  |  |
|     |           |         |         |    | -0.0001 0.4826 0.0052 0.0019 0.0002     |  |  |  |  |
|     |           |         |         |    | 0.0011 -0.0026 -0.0077 0.2021 -0.0017   |  |  |  |  |
|     |           |         |         |    | -0.0005 0.8519 -0.0056 0.0047 0.0000    |  |  |  |  |
|     |           |         |         |    | 0.0001 0.0081 -0.0019 0.0193            |  |  |  |  |
|     | ( 39.26%) | 0.6265* | H       | 93 | s( 99.96%)p 0.00( 0.04%)                |  |  |  |  |
|     |           |         |         |    | 0.9998 0.0015 0.0002 -0.0020 -0.0050    |  |  |  |  |
|     |           |         |         |    | -0.0203                                 |  |  |  |  |
| 69. | (1.98825) |         | BD ( 1) | C  | 30 - H 94                               |  |  |  |  |
|     | ( 60.66%) | 0.7789* | C       | 30 | s( 23.75%)p 3.21( 76.20%)d 0.00( 0.05%) |  |  |  |  |
|     |           |         |         |    | 0.0000 0.4873 0.0067 -0.0002 -0.0001    |  |  |  |  |
|     |           |         |         |    | -0.4764 -0.0046 -0.0087 0.6003 -0.0031  |  |  |  |  |
|     |           |         |         |    | 0.0010 -0.4178 0.0031 0.0025 -0.0138    |  |  |  |  |
|     |           |         |         |    | 0.0106 -0.0112 -0.0039 -0.0031          |  |  |  |  |
|     | ( 39.34%) | 0.6272* | H       | 94 | s( 99.95%)p 0.00( 0.05%)                |  |  |  |  |
|     |           |         |         |    | 0.9998 0.0022 0.0002 0.0107 -0.0148     |  |  |  |  |
|     |           |         |         |    | 0.0113                                  |  |  |  |  |
| 70. | (1.98830) |         | BD ( 1) | C  | 30 - H 95                               |  |  |  |  |
|     | ( 60.73%) | 0.7793* | C       | 30 | s( 23.66%)p 3.22( 76.29%)d 0.00( 0.05%) |  |  |  |  |
|     |           |         |         |    | -0.0001 0.4864 0.0049 0.0014 -0.0001    |  |  |  |  |
|     |           |         |         |    | -0.3962 -0.0009 -0.0082 -0.7729 0.0056  |  |  |  |  |
|     |           |         |         |    | -0.0006 -0.0916 0.0009 0.0042 0.0150    |  |  |  |  |
|     |           |         |         |    | 0.0031 0.0031 -0.0112 -0.0091           |  |  |  |  |
|     | ( 39.27%) | 0.6267* | H       | 95 | s( 99.96%)p 0.00( 0.04%)                |  |  |  |  |
|     |           |         |         |    | 0.9998 0.0012 0.0001 0.0092 0.0184      |  |  |  |  |
|     |           |         |         |    | 0.0025                                  |  |  |  |  |
| 71. | (1.96778) |         | BD ( 1) | C  | 31 - C 32                               |  |  |  |  |
|     | ( 50.61%) | 0.7114* | C       | 31 | s( 36.78%)p 1.72( 63.17%)d 0.00( 0.05%) |  |  |  |  |
|     |           |         |         |    | -0.0002 0.6065 -0.0017 -0.0032 0.0001   |  |  |  |  |
|     |           |         |         |    | 0.0389 0.0034 0.0005 0.4016 -0.0020     |  |  |  |  |
|     |           |         |         |    | -0.0015 0.6847 0.0088 0.0028 -0.0012    |  |  |  |  |
|     |           |         |         |    | 0.0011 0.0166 -0.0036 0.0135            |  |  |  |  |
|     | ( 49.39%) | 0.7028* | C       | 32 | s( 33.82%)p 1.96( 66.13%)d 0.00( 0.05%) |  |  |  |  |
|     |           |         |         |    | 0.0000 0.5815 0.0025 -0.0007 0.0000     |  |  |  |  |
|     |           |         |         |    | -0.0788 0.0101 -0.0023 -0.3802 -0.0088  |  |  |  |  |
|     |           |         |         |    | 0.0001 -0.7143 0.0021 0.0014 -0.0004    |  |  |  |  |
|     |           |         |         |    | 0.0025 0.0176 -0.0042 0.0140            |  |  |  |  |
| 72. | (1.96880) |         | BD ( 1) | C  | 31 - C 36                               |  |  |  |  |
|     | ( 50.73%) | 0.7122* | C       | 31 | s( 36.98%)p 1.70( 62.97%)d 0.00( 0.05%) |  |  |  |  |
|     |           |         |         |    | -0.0002 0.6081 -0.0016 -0.0025 0.0001   |  |  |  |  |
|     |           |         |         |    | 0.5173 0.0061 0.0000 -0.5489 -0.0054    |  |  |  |  |
|     |           |         |         |    | -0.0031 -0.2464 0.0054 0.0025 -0.0169   |  |  |  |  |
|     |           |         |         |    | -0.0061 0.0095 -0.0022 -0.0070          |  |  |  |  |
|     | ( 49.27%) | 0.7020* | C       | 36 | s( 33.78%)p 1.96( 66.16%)d 0.00( 0.05%) |  |  |  |  |
|     |           |         |         |    | 0.0000 0.5812 0.0025 -0.0001 0.0000     |  |  |  |  |
|     |           |         |         |    | -0.5450 0.0036 -0.0022 0.5690 0.0023    |  |  |  |  |
|     |           |         |         |    | -0.0011 0.2015 0.0133 -0.0006 -0.0186   |  |  |  |  |
|     |           |         |         |    | -0.0066 0.0093 -0.0008 -0.0077          |  |  |  |  |
| 73. | (1.65932) |         | BD ( 2) | C  | 31 - C 36                               |  |  |  |  |
|     | ( 54.31%) | 0.7370* | C       | 31 | s( 0.01%)p99.99( 99.97%)d 1.31( 0.02%)  |  |  |  |  |
|     |           |         |         |    | 0.0002 0.0082 0.0087 -0.0009 -0.0001    |  |  |  |  |

|     |           |         |             |                                          |         |         |         |         |         |
|-----|-----------|---------|-------------|------------------------------------------|---------|---------|---------|---------|---------|
|     |           |         |             |                                          | 0.5306  | -0.0061 | -0.0063 | 0.7140  | -0.0026 |
|     |           |         |             |                                          | -0.0042 | -0.4562 | 0.0007  | 0.0033  | 0.0013  |
|     |           |         |             |                                          | -0.0047 | 0.0046  | 0.0119  | 0.0012  |         |
|     | ( 45.69%) | 0.6759* | C 36        | s ( 0.00%)p 1.00( 99.95%)d 0.00( 0.05%)  | 0.0000  | 0.0004  | 0.0057  | -0.0010 | -0.0001 |
|     |           |         |             |                                          | 0.5517  | -0.0041 | 0.0008  | 0.6923  | -0.0101 |
|     |           |         |             |                                          | -0.0043 | -0.4644 | 0.0046  | 0.0005  | 0.0017  |
|     |           |         |             |                                          | 0.0118  | 0.0024  | -0.0155 | -0.0107 |         |
| 74. | (1.97272) | BD ( 1) | C 32 - C 33 |                                          |         |         |         |         |         |
|     | ( 50.56%) | 0.7110* | C 32        | s ( 34.05%)p 1.94( 65.90%)d 0.00( 0.05%) | -0.0001 | 0.5834  | 0.0094  | 0.0040  | 0.0001  |
|     |           |         |             |                                          | 0.6245  | 0.0001  | 0.0038  | -0.1621 | -0.0065 |
|     |           |         |             |                                          | 0.0023  | 0.4925  | -0.0078 | 0.0093  | -0.0081 |
|     |           |         |             |                                          | 0.0169  | -0.0031 | 0.0103  | 0.0005  |         |
|     | ( 49.44%) | 0.7032* | C 33        | s ( 35.75%)p 1.80( 64.19%)d 0.00( 0.06%) | 0.0001  | 0.5979  | -0.0011 | -0.0044 | -0.0001 |
|     |           |         |             |                                          | -0.6298 | -0.0154 | 0.0076  | 0.1843  | 0.0134  |
|     |           |         |             |                                          | -0.0007 | -0.4591 | 0.0018  | 0.0081  | -0.0085 |
|     |           |         |             |                                          | 0.0198  | -0.0030 | 0.0117  | 0.0013  |         |
| 75. | (1.64228) | BD ( 2) | C 32 - C 33 |                                          |         |         |         |         |         |
|     | ( 48.38%) | 0.6956* | C 32        | s ( 0.01%)p 1.00( 99.96%)d 0.00( 0.03%)  | 0.0001  | 0.0002  | 0.0071  | -0.0021 | -0.0001 |
|     |           |         |             |                                          | 0.5350  | -0.0046 | -0.0012 | 0.7197  | -0.0022 |
|     |           |         |             |                                          | 0.0042  | -0.4419 | 0.0039  | 0.0014  | 0.0053  |
|     |           |         |             |                                          | -0.0052 | 0.0062  | 0.0150  | -0.0017 |         |
|     | ( 51.62%) | 0.7184* | C 33        | s ( 0.00%)p 1.00( 99.97%)d 0.00( 0.03%)  | 0.0001  | 0.0016  | 0.0012  | -0.0001 | -0.0001 |
|     |           |         |             |                                          | 0.5376  | -0.0028 | 0.0092  | 0.7132  | -0.0032 |
|     |           |         |             |                                          | 0.0113  | -0.4491 | 0.0015  | -0.0089 | -0.0083 |
|     |           |         |             |                                          | -0.0035 | -0.0097 | -0.0037 | 0.0113  |         |
| 76. | (1.97001) | BD ( 1) | C 32 - C 37 |                                          |         |         |         |         |         |
|     | ( 50.23%) | 0.7087* | C 32        | s ( 32.10%)p 2.11( 67.87%)d 0.00( 0.03%) | -0.0001 | 0.5665  | -0.0064 | -0.0038 | 0.0000  |
|     |           |         |             |                                          | -0.5628 | -0.0103 | 0.0042  | 0.5572  | 0.0122  |
|     |           |         |             |                                          | -0.0048 | 0.2264  | 0.0063  | -0.0002 | -0.0144 |
|     |           |         |             |                                          | -0.0047 | 0.0061  | 0.0010  | -0.0064 |         |
|     | ( 49.77%) | 0.7055* | C 37        | s ( 26.54%)p 2.77( 73.40%)d 0.00( 0.06%) | 0.0001  | 0.5152  | 0.0012  | -0.0021 | -0.0001 |
|     |           |         |             |                                          | 0.5819  | -0.0019 | -0.0024 | -0.5808 | 0.0006  |
|     |           |         |             |                                          | 0.0011  | -0.2409 | -0.0016 | 0.0035  | -0.0189 |
|     |           |         |             |                                          | -0.0080 | 0.0079  | -0.0002 | -0.0090 |         |
| 77. | (1.98090) | BD ( 1) | C 33 - C 34 |                                          |         |         |         |         |         |
|     | ( 50.22%) | 0.7086* | C 33        | s ( 36.06%)p 1.77( 63.89%)d 0.00( 0.05%) | 0.0000  | 0.6003  | 0.0142  | 0.0045  | 0.0000  |
|     |           |         |             |                                          | 0.5534  | 0.0226  | 0.0069  | -0.5416 | -0.0063 |
|     |           |         |             |                                          | 0.0020  | -0.1955 | 0.0178  | 0.0118  | -0.0170 |
|     |           |         |             |                                          | -0.0080 | 0.0113  | -0.0022 | -0.0056 |         |
|     | ( 49.78%) | 0.7056* | C 34        | s ( 35.89%)p 1.78( 64.04%)d 0.00( 0.07%) | 0.0000  | 0.5990  | 0.0074  | -0.0018 | -0.0001 |
|     |           |         |             |                                          | -0.5213 | 0.0002  | 0.0098  | 0.5587  | 0.0181  |
|     |           |         |             |                                          | -0.0052 | 0.2351  | 0.0270  | 0.0075  | -0.0221 |
|     |           |         |             |                                          | -0.0044 | 0.0059  | 0.0021  | -0.0108 |         |
| 78. | (1.97515) | BD ( 1) | C 33 - H 70 |                                          |         |         |         |         |         |
|     | ( 60.92%) | 0.7805* | C 33        | s ( 28.16%)p 2.55( 71.80%)d 0.00( 0.04%) | -0.0004 | 0.5306  | -0.0109 | -0.0005 | 0.0001  |
|     |           |         |             |                                          | 0.0816  | 0.0035  | 0.0002  | 0.4036  | -0.0098 |
|     |           |         |             |                                          | -0.0078 | 0.7403  | -0.0129 | -0.0104 | 0.0010  |
|     |           |         |             |                                          | 0.0026  | 0.0140  | -0.0038 | 0.0120  |         |
|     | ( 39.08%) | 0.6251* | H 70        | s ( 99.95%)p 0.00( 0.05%)                | 0.9997  | 0.0019  | 0.0013  | -0.0021 | -0.0114 |
|     |           |         |             |                                          | -0.0202 |         |         |         |         |
| 79. | (1.98086) | BD ( 1) | C 34 - C 35 |                                          |         |         |         |         |         |
|     | ( 49.88%) | 0.7062* | C 34        | s ( 36.02%)p 1.77( 63.92%)d 0.00( 0.06%) | 0.0000  | 0.6001  | 0.0067  | -0.0022 | -0.0002 |
|     |           |         |             |                                          | -0.0528 | 0.0196  | 0.0070  | -0.4018 | -0.0227 |
|     |           |         |             |                                          | -0.0036 | -0.6883 | -0.0117 | 0.0110  | 0.0021  |
|     |           |         |             |                                          | 0.0078  | 0.0170  | -0.0027 | 0.0169  |         |
|     | ( 50.12%) | 0.7080* | C 35        | s ( 35.99%)p 1.78( 63.96%)d 0.00( 0.05%) | 0.0000  | 0.5997  | 0.0141  | 0.0044  | 0.0001  |
|     |           |         |             |                                          | 0.0989  | 0.0230  | 0.0088  | 0.3787  | -0.0068 |
|     |           |         |             |                                          | -0.0087 | 0.6967  | 0.0182  | 0.0056  | -0.0012 |



|     |           |           |               |            |                 |                |         |         |
|-----|-----------|-----------|---------------|------------|-----------------|----------------|---------|---------|
|     |           |           |               | -0.3100    | -0.0081         | 0.0025         | -0.7838 | -0.0066 |
|     |           |           |               | 0.0090     | 0.0450          | 0.0031         | -0.0042 | 0.0125  |
|     |           |           |               | -0.0009    | -0.0026         | -0.0133        | -0.0107 |         |
| 87. | (1.96378) | BD ( 1) C | 37 - H 85     |            |                 |                |         |         |
|     | ( 61.15%) |           | 0.7820* C 37  | s( 20.87%) | p 3.79( 79.08%) | d 0.00( 0.05%) |         |         |
|     |           |           |               | 0.0002     | -0.4564         | -0.0202        | 0.0004  | -0.0001 |
|     |           |           |               | 0.6842     | -0.0102         | 0.0026         | 0.0463  | -0.0035 |
|     |           |           |               | -0.0031    | 0.5659          | -0.0096        | -0.0078 | -0.0018 |
|     |           |           |               | -0.0195    | -0.0016         | -0.0118        | -0.0025 |         |
|     | ( 38.85%) |           | 0.6233* H 85  | s( 99.95%) | p 0.00( 0.05%)  |                |         |         |
|     |           |           |               | -0.9998    | -0.0055         | -0.0003        | -0.0160 | -0.0013 |
|     |           |           |               | -0.0141    |                 |                |         |         |
| 88. | (1.98608) | BD ( 1) C | 38 - H 105    |            |                 |                |         |         |
|     | ( 60.86%) |           | 0.7801* C 38  | s( 23.26%) | p 3.30( 76.70%) | d 0.00( 0.04%) |         |         |
|     |           |           |               | -0.0001    | 0.4823          | 0.0050         | 0.0014  | 0.0002  |
|     |           |           |               | -0.6347    | 0.0039          | -0.0046        | 0.5690  | -0.0053 |
|     |           |           |               | -0.0016    | 0.2004          | 0.0007         | 0.0077  | -0.0169 |
|     |           |           |               | -0.0055    | 0.0062          | 0.0016         | -0.0093 |         |
|     | ( 39.14%) |           | 0.6256* H 105 | s( 99.96%) | p 0.00( 0.04%)  |                |         |         |
|     |           |           |               | 0.9998     | 0.0013          | 0.0002         | 0.0151  | -0.0144 |
|     |           |           |               | -0.0031    |                 |                |         |         |
| 89. | (1.98876) | BD ( 1) C | 38 - H 106    |            |                 |                |         |         |
|     | ( 60.83%) |           | 0.7800* C 38  | s( 23.69%) | p 3.22( 76.26%) | d 0.00( 0.04%) |         |         |
|     |           |           |               | -0.0001    | 0.4867          | 0.0057         | 0.0014  | -0.0001 |
|     |           |           |               | -0.3371    | 0.0018          | -0.0046        | -0.8043 | 0.0049  |
|     |           |           |               | -0.0022    | 0.0449          | 0.0034         | 0.0073  | 0.0122  |
|     |           |           |               | 0.0001     | -0.0020         | -0.0124        | -0.0117 |         |
|     | ( 39.17%) |           | 0.6258* H 106 | s( 99.96%) | p 0.00( 0.04%)  |                |         |         |
|     |           |           |               | 0.9998     | 0.0012          | 0.0001         | 0.0076  | 0.0195  |
|     |           |           |               | -0.0007    |                 |                |         |         |
| 90. | (1.98837) | BD ( 1) C | 38 - H 107    |            |                 |                |         |         |
|     | ( 60.57%) |           | 0.7782* C 38  | s( 23.75%) | p 3.21( 76.20%) | d 0.00( 0.05%) |         |         |
|     |           |           |               | 0.0000     | 0.4873          | 0.0061         | -0.0002 | -0.0001 |
|     |           |           |               | 0.6228     | -0.0046         | -0.0024        | 0.0677  | -0.0027 |
|     |           |           |               | -0.0014    | 0.6078          | 0.0039         | 0.0086  | 0.0015  |
|     |           |           |               | 0.0190     | 0.0026          | 0.0083         | 0.0042  |         |
|     | ( 39.43%) |           | 0.6280* H 107 | s( 99.95%) | p 0.00( 0.05%)  |                |         |         |
|     |           |           |               | 0.9998     | 0.0023          | 0.0002         | -0.0158 | -0.0015 |
|     |           |           |               | -0.0142    |                 |                |         |         |
| 91. | (1.97424) | BD ( 1) C | 39 - C 40     |            |                 |                |         |         |
|     | ( 50.69%) |           | 0.7120* C 39  | s( 25.93%) | p 2.85( 74.03%) | d 0.00( 0.04%) |         |         |
|     |           |           |               | -0.0001    | 0.5091          | -0.0127        | 0.0008  | 0.0000  |
|     |           |           |               | -0.1679    | -0.0122         | -0.0013        | -0.8291 | -0.0066 |
|     |           |           |               | -0.0029    | 0.1563          | -0.0056        | -0.0017 | 0.0059  |
|     |           |           |               | -0.0010    | -0.0074         | -0.0154        | -0.0076 |         |
|     | ( 49.31%) |           | 0.7022* C 40  | s( 29.25%) | p 2.42( 70.71%) | d 0.00( 0.05%) |         |         |
|     |           |           |               | 0.0003     | 0.5405          | -0.0192        | -0.0027 | 0.0001  |
|     |           |           |               | 0.1631     | 0.0001          | -0.0048        | 0.8120  | 0.0118  |
|     |           |           |               | -0.0144    | -0.1443         | -0.0058        | 0.0009  | 0.0074  |
|     |           |           |               | -0.0012    | -0.0062         | -0.0163        | -0.0097 |         |
| 92. | (1.97484) | BD ( 1) C | 39 - C 56     |            |                 |                |         |         |
|     | ( 51.57%) |           | 0.7181* C 39  | s( 26.76%) | p 2.74( 73.21%) | d 0.00( 0.03%) |         |         |
|     |           |           |               | -0.0001    | 0.5172          | -0.0107        | 0.0016  | 0.0001  |
|     |           |           |               | 0.6945     | -0.0043         | 0.0029         | 0.0842  | 0.0075  |
|     |           |           |               | -0.0041    | -0.4924         | -0.0115        | -0.0055 | 0.0029  |
|     |           |           |               | -0.0144    | -0.0013         | 0.0107         | -0.0012 |         |
|     | ( 48.43%) |           | 0.6959* C 56  | s( 28.64%) | p 2.49( 71.31%) | d 0.00( 0.05%) |         |         |
|     |           |           |               | 0.0003     | 0.5350          | -0.0137        | -0.0009 | -0.0005 |
|     |           |           |               | -0.6749    | -0.0104         | 0.0077         | -0.0911 | -0.0043 |
|     |           |           |               | 0.0040     | 0.4991          | 0.0006         | -0.0072 | 0.0036  |
|     |           |           |               | -0.0176    | -0.0028         | 0.0117         | 0.0006  |         |
| 93. | (1.96388) | BD ( 1) C | 39 - H 86     |            |                 |                |         |         |
|     | ( 61.33%) |           | 0.7831* C 39  | s( 20.93%) | p 3.78( 79.02%) | d 0.00( 0.05%) |         |         |
|     |           |           |               | 0.0002     | -0.4570         | -0.0204        | 0.0005  | -0.0001 |
|     |           |           |               | 0.6937     | -0.0148         | -0.0011        | -0.3371 | 0.0045  |
|     |           |           |               | 0.0086     | 0.4416          | -0.0045        | 0.0041  | 0.0119  |
|     |           |           |               | -0.0152    | 0.0071          | -0.0093        | 0.0035  |         |
|     | ( 38.67%) |           | 0.6218* H 86  | s( 99.95%) | p 0.00( 0.05%)  |                |         |         |
|     |           |           |               | -0.9998    | -0.0050         | -0.0003        | -0.0161 | 0.0093  |
|     |           |           |               | -0.0107    |                 |                |         |         |
| 94. | (1.98600) | BD ( 1) C | 40 - H 99     |            |                 |                |         |         |

|                |           |         |   |            |                                          |  |  |  |  |
|----------------|-----------|---------|---|------------|------------------------------------------|--|--|--|--|
|                | ( 60.87%) | 0.7802* | C | 40         | s( 23.33%)p 3.28( 76.62%)d 0.00( 0.04%)  |  |  |  |  |
|                |           |         |   |            | -0.0002 0.4830 0.0052 0.0020 0.0001      |  |  |  |  |
|                |           |         |   |            | -0.1246 0.0003 -0.0030 -0.4299 0.0014    |  |  |  |  |
|                |           |         |   |            | -0.0085 -0.7522 0.0064 0.0003 0.0022     |  |  |  |  |
|                |           |         |   |            | 0.0044 0.0157 -0.0032 0.0126             |  |  |  |  |
|                | ( 39.13%) | 0.6255* | H | 99         | s( 99.96%)p 0.00( 0.04%)                 |  |  |  |  |
|                |           |         |   |            | 0.9998 0.0015 0.0002 0.0026 0.0085       |  |  |  |  |
|                |           |         |   |            | 0.0190                                   |  |  |  |  |
| 95. (1.98848)  | BD ( 1)   |         | C | 40 - H 100 |                                          |  |  |  |  |
|                | ( 60.59%) | 0.7784* | C | 40         | s( 23.74%)p 3.21( 76.21%)d 0.00( 0.05%)  |  |  |  |  |
|                |           |         |   |            | 0.0000 0.4872 0.0070 -0.0002 -0.0001     |  |  |  |  |
|                |           |         |   |            | 0.6620 -0.0040 -0.0009 -0.3821 -0.0043   |  |  |  |  |
|                |           |         |   |            | -0.0090 0.4216 0.0002 0.0023 -0.0130     |  |  |  |  |
|                |           |         |   |            | 0.0130 -0.0075 0.0076 -0.0021            |  |  |  |  |
|                | ( 39.41%) | 0.6278* | H | 100        | s( 99.95%)p 0.00( 0.05%)                 |  |  |  |  |
|                |           |         |   |            | 0.9998 0.0023 0.0002 -0.0169 0.0084      |  |  |  |  |
|                |           |         |   |            | -0.0106                                  |  |  |  |  |
| 96. (1.98843)  | BD ( 1)   |         | C | 40 - H 101 |                                          |  |  |  |  |
|                | ( 60.68%) | 0.7790* | C | 40         | s( 23.68%)p 3.22( 76.28%)d 0.00( 0.05%)  |  |  |  |  |
|                |           |         |   |            | 0.0001 -0.4866 -0.0049 -0.0013 0.0001    |  |  |  |  |
|                |           |         |   |            | 0.7204 -0.0044 0.0028 0.0929 0.0021      |  |  |  |  |
|                |           |         |   |            | 0.0090 -0.4848 0.0023 -0.0007 -0.0031    |  |  |  |  |
|                |           |         |   |            | 0.0160 0.0020 -0.0134 -0.0006            |  |  |  |  |
|                | ( 39.32%) | 0.6271* | H | 101        | s( 99.96%)p 0.00( 0.04%)                 |  |  |  |  |
|                |           |         |   |            | -0.9998 -0.0013 -0.0001 -0.0172 -0.0018  |  |  |  |  |
|                |           |         |   |            | 0.0115                                   |  |  |  |  |
| 97. (1.75785)  | BD ( 1)   |         | C | 41 - C 42  |                                          |  |  |  |  |
|                | ( 44.52%) | 0.6672* | C | 41         | s( 37.96%)p 1.30( 49.31%)d 0.34( 12.73%) |  |  |  |  |
|                |           |         |   |            | 0.0000 -0.6133 -0.0553 -0.0197 -0.0027   |  |  |  |  |
|                |           |         |   |            | 0.1738 -0.0779 0.0533 0.3260 0.0165      |  |  |  |  |
|                |           |         |   |            | -0.0382 0.5291 -0.2482 0.0670 -0.1555    |  |  |  |  |
|                |           |         |   |            | 0.0408 -0.2973 -0.0180 -0.1130           |  |  |  |  |
|                | ( 55.48%) | 0.7449* | C | 42         | s( 33.58%)p 1.98( 66.37%)d 0.00( 0.05%)  |  |  |  |  |
|                |           |         |   |            | 0.0000 -0.5794 -0.0030 0.0010 0.0000     |  |  |  |  |
|                |           |         |   |            | -0.1977 -0.0101 0.0001 -0.3551 0.0092    |  |  |  |  |
|                |           |         |   |            | -0.0019 -0.7059 -0.0035 0.0009 -0.0035   |  |  |  |  |
|                |           |         |   |            | -0.0108 -0.0139 0.0024 -0.0147           |  |  |  |  |
| 98. (1.74502)  | BD ( 1)   |         | C | 41 - C 46  |                                          |  |  |  |  |
|                | ( 43.76%) | 0.6615* | C | 41         | s( 36.17%)p 1.39( 50.23%)d 0.38( 13.60%) |  |  |  |  |
|                |           |         |   |            | -0.0003 0.5978 -0.0609 -0.0258 -0.0025   |  |  |  |  |
|                |           |         |   |            | 0.4202 -0.0918 0.0612 -0.3387 0.0307     |  |  |  |  |
|                |           |         |   |            | -0.0408 0.3585 -0.2513 0.0670 -0.1684    |  |  |  |  |
|                |           |         |   |            | 0.0685 -0.3050 -0.0176 -0.0983           |  |  |  |  |
|                | ( 56.24%) | 0.7499* | C | 46         | s( 34.19%)p 1.92( 65.76%)d 0.00( 0.05%)  |  |  |  |  |
|                |           |         |   |            | 0.0000 0.5847 0.0020 -0.0002 0.0001      |  |  |  |  |
|                |           |         |   |            | -0.4969 0.0013 0.0017 0.3954 -0.0085     |  |  |  |  |
|                |           |         |   |            | 0.0026 -0.5041 -0.0105 0.0009 -0.0112    |  |  |  |  |
|                |           |         |   |            | 0.0162 -0.0106 0.0022 0.0038             |  |  |  |  |
| 99. (1.64949)  | BD ( 2)   |         | C | 41 - C 46  |                                          |  |  |  |  |
|                | ( 52.75%) | 0.7263* | C | 41         | s( 0.04%)p99.99( 98.66%)d31.71( 1.30%)   |  |  |  |  |
|                |           |         |   |            | -0.0001 -0.0118 0.0141 0.0085 0.0011     |  |  |  |  |
|                |           |         |   |            | 0.8228 0.0283 -0.0244 0.3815 -0.0045     |  |  |  |  |
|                |           |         |   |            | 0.0080 -0.3956 0.0759 -0.0186 0.0462     |  |  |  |  |
|                |           |         |   |            | -0.0154 0.0984 0.0174 0.0260             |  |  |  |  |
|                | ( 47.25%) | 0.6874* | C | 46         | s( 0.00%)p 1.00( 99.95%)d 0.00( 0.05%)   |  |  |  |  |
|                |           |         |   |            | 0.0000 0.0021 -0.0037 0.0023 0.0000      |  |  |  |  |
|                |           |         |   |            | 0.7900 -0.0074 -0.0041 0.4143 -0.0014    |  |  |  |  |
|                |           |         |   |            | -0.0003 -0.4514 0.0046 -0.0002 -0.0022   |  |  |  |  |
|                |           |         |   |            | -0.0093 -0.0084 -0.0097 0.0141           |  |  |  |  |
| 100. (1.97345) | BD ( 1)   |         | C | 42 - C 43  |                                          |  |  |  |  |
|                | ( 50.39%) | 0.7099* | C | 42         | s( 34.02%)p 1.94( 65.93%)d 0.00( 0.05%)  |  |  |  |  |
|                |           |         |   |            | -0.0001 0.5832 0.0088 0.0050 0.0002      |  |  |  |  |
|                |           |         |   |            | 0.2753 0.0041 0.0005 -0.7415 0.0016      |  |  |  |  |
|                |           |         |   |            | -0.0070 -0.1828 0.0102 -0.0089 -0.0136   |  |  |  |  |
|                |           |         |   |            | -0.0013 0.0067 -0.0129 -0.0084           |  |  |  |  |
|                | ( 49.61%) | 0.7043* | C | 43         | s( 35.87%)p 1.79( 64.06%)d 0.00( 0.06%)  |  |  |  |  |
|                |           |         |   |            | 0.0001 0.5989 -0.0004 -0.0039 -0.0003    |  |  |  |  |
|                |           |         |   |            | -0.3007 -0.0136 0.0026 0.7243 0.0129     |  |  |  |  |
|                |           |         |   |            | -0.0092 0.1581 -0.0100 -0.0053 -0.0146   |  |  |  |  |
|                |           |         |   |            | -0.0012 0.0090 -0.0152 -0.0090           |  |  |  |  |
| 101. (1.63619) | BD ( 2)   |         | C | 42 - C 43  |                                          |  |  |  |  |

|      |           |         |         |             |                                         |  |  |  |  |
|------|-----------|---------|---------|-------------|-----------------------------------------|--|--|--|--|
|      | ( 47.83%) | 0.6916* | C       | 42          | s( 0.00%)p 1.00( 99.96%)d 0.00( 0.04%)  |  |  |  |  |
|      |           |         |         |             | -0.0002 0.0002 -0.0028 0.0010 0.0001    |  |  |  |  |
|      |           |         |         |             | 0.8064 -0.0066 0.0027 0.4056 -0.0017    |  |  |  |  |
|      |           |         |         |             | -0.0021 -0.4299 0.0017 -0.0012 -0.0069  |  |  |  |  |
|      |           |         |         |             | -0.0004 0.0089 0.0148 -0.0045           |  |  |  |  |
|      | ( 52.17%) | 0.7223* | C       | 43          | s( 0.00%)p 1.00( 99.97%)d 0.00( 0.03%)  |  |  |  |  |
|      |           |         |         |             | 0.0000 0.0023 0.0003 -0.0005 0.0002     |  |  |  |  |
|      |           |         |         |             | 0.7924 -0.0040 0.0130 0.4229 -0.0035    |  |  |  |  |
|      |           |         |         |             | 0.0087 -0.4389 0.0043 -0.0083 0.0107    |  |  |  |  |
|      |           |         |         |             | 0.0088 -0.0018 -0.0073 -0.0083          |  |  |  |  |
| 102. | (1.96988) |         | BD ( 1) | C 42 - C 47 |                                         |  |  |  |  |
|      | ( 50.60%) | 0.7114* | C       | 42          | s( 32.37%)p 2.09( 67.60%)d 0.00( 0.03%) |  |  |  |  |
|      |           |         |         |             | -0.0001 0.5689 -0.0064 -0.0048 -0.0002  |  |  |  |  |
|      |           |         |         |             | -0.4840 -0.0068 0.0034 0.3985 0.0093    |  |  |  |  |
|      |           |         |         |             | -0.0061 -0.5316 -0.0132 0.0034 -0.0092  |  |  |  |  |
|      |           |         |         |             | 0.0114 -0.0093 -0.0001 0.0027           |  |  |  |  |
|      | ( 49.40%) | 0.7028* | C       | 47          | s( 26.33%)p 2.80( 73.61%)d 0.00( 0.06%) |  |  |  |  |
|      |           |         |         |             | 0.0002 0.5132 -0.0005 0.0010 0.0007     |  |  |  |  |
|      |           |         |         |             | 0.4936 -0.0042 -0.0002 -0.4257 0.0009   |  |  |  |  |
|      |           |         |         |             | -0.0034 0.5579 0.0015 0.0008 -0.0116    |  |  |  |  |
|      |           |         |         |             | 0.0157 -0.0134 0.0027 0.0026            |  |  |  |  |
| 103. | (1.98096) |         | BD ( 1) | C 43 - C 44 |                                         |  |  |  |  |
|      | ( 50.07%) | 0.7076* | C       | 43          | s( 35.86%)p 1.79( 64.08%)d 0.00( 0.05%) |  |  |  |  |
|      |           |         |         |             | 0.0000 -0.5987 -0.0137 -0.0045 -0.0002  |  |  |  |  |
|      |           |         |         |             | -0.4855 -0.0113 -0.0009 0.4007 0.0269   |  |  |  |  |
|      |           |         |         |             | 0.0107 -0.4934 0.0064 0.0094 0.0091     |  |  |  |  |
|      |           |         |         |             | -0.0170 0.0093 -0.0036 -0.0064          |  |  |  |  |
|      | ( 49.93%) | 0.7066* | C       | 44          | s( 35.97%)p 1.78( 63.96%)d 0.00( 0.07%) |  |  |  |  |
|      |           |         |         |             | 0.0000 -0.5997 -0.0065 0.0023 0.0001    |  |  |  |  |
|      |           |         |         |             | 0.4876 0.0109 -0.0078 -0.3579 0.0108    |  |  |  |  |
|      |           |         |         |             | 0.0123 0.5220 0.0287 0.0016 0.0159      |  |  |  |  |
|      |           |         |         |             | -0.0157 0.0125 -0.0004 0.0005           |  |  |  |  |
| 104. | (1.97475) |         | BD ( 1) | C 43 - H 75 |                                         |  |  |  |  |
|      | ( 61.07%) | 0.7815* | C       | 43          | s( 28.23%)p 2.54( 71.73%)d 0.00( 0.04%) |  |  |  |  |
|      |           |         |         |             | 0.0004 -0.5312 0.0110 0.0007 -0.0001    |  |  |  |  |
|      |           |         |         |             | 0.2119 -0.0050 -0.0050 0.3668 -0.0028   |  |  |  |  |
|      |           |         |         |             | -0.0041 0.7331 -0.0148 -0.0114 -0.0034  |  |  |  |  |
|      |           |         |         |             | -0.0074 -0.0121 0.0022 -0.0121          |  |  |  |  |
|      | ( 38.93%) | 0.6239* | H       | 75          | s( 99.94%)p 0.00( 0.06%)                |  |  |  |  |
|      |           |         |         |             | -0.9997 0.0021 -0.0014 -0.0069 -0.0098  |  |  |  |  |
|      |           |         |         |             | -0.0202                                 |  |  |  |  |
| 105. | (1.98096) |         | BD ( 1) | C 44 - C 45 |                                         |  |  |  |  |
|      | ( 49.79%) | 0.7056* | C       | 44          | s( 36.00%)p 1.78( 63.94%)d 0.00( 0.07%) |  |  |  |  |
|      |           |         |         |             | 0.0000 0.5999 0.0077 -0.0018 -0.0001    |  |  |  |  |
|      |           |         |         |             | 0.2211 0.0194 0.0052 0.3173 -0.0121     |  |  |  |  |
|      |           |         |         |             | -0.0121 0.6989 0.0237 -0.0060 0.0028    |  |  |  |  |
|      |           |         |         |             | 0.0082 0.0189 -0.0057 0.0138            |  |  |  |  |
|      | ( 50.21%) | 0.7086* | C       | 45          | s( 36.09%)p 1.77( 63.86%)d 0.00( 0.05%) |  |  |  |  |
|      |           |         |         |             | 0.0000 0.6005 0.0145 0.0043 0.0000      |  |  |  |  |
|      |           |         |         |             | -0.1901 0.0105 0.0087 -0.3628 -0.0269   |  |  |  |  |
|      |           |         |         |             | -0.0111 -0.6854 -0.0074 0.0027 0.0029   |  |  |  |  |
|      |           |         |         |             | 0.0122 0.0110 -0.0004 0.0153            |  |  |  |  |
| 106. | (1.67441) |         | BD ( 2) | C 44 - C 45 |                                         |  |  |  |  |
|      | ( 48.91%) | 0.6994* | C       | 44          | s( 0.00%)p 1.00( 99.97%)d 0.00( 0.03%)  |  |  |  |  |
|      |           |         |         |             | 0.0000 0.0020 0.0000 0.0013 0.0002      |  |  |  |  |
|      |           |         |         |             | 0.7891 -0.0075 0.0086 0.4240 -0.0036    |  |  |  |  |
|      |           |         |         |             | 0.0035 -0.4439 0.0042 -0.0045 0.0088    |  |  |  |  |
|      |           |         |         |             | 0.0092 -0.0004 -0.0054 -0.0083          |  |  |  |  |
|      | ( 51.09%) | 0.7148* | C       | 45          | s( 0.00%)p 1.00( 99.98%)d 0.00( 0.02%)  |  |  |  |  |
|      |           |         |         |             | 0.0000 0.0006 0.0004 0.0008 0.0003      |  |  |  |  |
|      |           |         |         |             | 0.7888 -0.0079 0.0174 0.4249 -0.0044    |  |  |  |  |
|      |           |         |         |             | 0.0092 -0.4432 0.0044 -0.0094 -0.0024   |  |  |  |  |
|      |           |         |         |             | -0.0065 -0.0058 -0.0069 0.0101          |  |  |  |  |
| 107. | (1.97752) |         | BD ( 1) | C 44 - H 74 |                                         |  |  |  |  |
|      | ( 60.87%) | 0.7802* | C       | 44          | s( 27.98%)p 2.57( 71.99%)d 0.00( 0.03%) |  |  |  |  |
|      |           |         |         |             | 0.0004 -0.5288 0.0120 -0.0037 -0.0003   |  |  |  |  |
|      |           |         |         |             | -0.2992 0.0092 -0.0021 0.7682 -0.0213   |  |  |  |  |
|      |           |         |         |             | 0.0037 0.1992 -0.0055 0.0010 0.0075     |  |  |  |  |
|      |           |         |         |             | 0.0069 -0.0052 0.0098 0.0099            |  |  |  |  |
|      | ( 39.13%) | 0.6255* | H       | 74          | s( 99.95%)p 0.00( 0.05%)                |  |  |  |  |
|      |           |         |         |             | -0.9997 -0.0015 -0.0005 0.0081 -0.0208  |  |  |  |  |

-0.0056

108. (1.97278) BD ( 1) C 45 - C 46  
 ( 49.52%) 0.7037\* C 45 s( 35.81%)p 1.79( 64.13%)d 0.00( 0.06%)  
 0.0001 0.5984 -0.0015 -0.0044 -0.0001  
 -0.2685 0.0021 0.0054 0.7226 0.0119  
 -0.0097 0.2157 0.0166 -0.0008 -0.0144  
 -0.0012 0.0096 -0.0151 -0.0088  
 ( 50.48%) 0.7105\* C 46 s( 33.92%)p 1.95( 66.03%)d 0.00( 0.05%)  
 -0.0001 0.5823 0.0105 0.0032 0.0001  
 0.2821 -0.0061 0.0072 -0.7397 0.0039  
 -0.0067 -0.1828 -0.0064 0.0029 -0.0123  
 -0.0015 0.0091 -0.0133 -0.0076

109. (1.97534) BD ( 1) C 45 - H 73  
 ( 60.77%) 0.7795\* C 45 s( 28.08%)p 2.56( 71.89%)d 0.00( 0.04%)  
 -0.0004 0.5298 -0.0108 -0.0003 0.0001  
 0.5182 -0.0097 -0.0075 -0.4053 0.0025  
 0.0044 0.5345 -0.0133 -0.0097 -0.0095  
 0.0131 -0.0096 0.0024 0.0022  
 ( 39.23%) 0.6264\* H 73 s( 99.95%)p 0.00( 0.05%)  
 0.9997 0.0022 0.0013 -0.0141 0.0109  
 -0.0148

110. (1.96959) BD ( 1) C 46 - C 49  
 ( 50.02%) 0.7072\* C 46 s( 31.86%)p 2.14( 68.11%)d 0.00( 0.03%)  
 -0.0001 0.5644 -0.0068 -0.0036 -0.0001  
 0.2210 0.0078 -0.0009 0.3522 0.0054  
 -0.0021 0.7127 0.0147 -0.0044 0.0028  
 0.0079 0.0115 -0.0023 0.0105  
 ( 49.98%) 0.7070\* C 49 s( 26.68%)p 2.75( 73.27%)d 0.00( 0.06%)  
 0.0001 0.5165 0.0013 -0.0016 -0.0001  
 -0.2369 -0.0022 0.0021 -0.3571 0.0024  
 0.0001 -0.7410 0.0012 0.0030 0.0047  
 0.0095 0.0147 -0.0019 0.0149

111. (1.96910) BD ( 1) C 47 - C 48  
 ( 50.59%) 0.7113\* C 47 s( 25.46%)p 2.93( 74.50%)d 0.00( 0.04%)  
 -0.0001 0.5044 -0.0108 0.0010 -0.0002  
 0.4860 -0.0006 0.0000 0.4814 0.0109  
 0.0039 -0.5263 -0.0032 -0.0033 0.0111  
 -0.0120 -0.0111 0.0025 0.0007  
 ( 49.41%) 0.7029\* C 48 s( 29.04%)p 2.44( 70.91%)d 0.00( 0.04%)  
 0.0004 0.5385 -0.0197 -0.0031 0.0001  
 -0.4637 -0.0097 0.0063 -0.4668 -0.0057  
 0.0107 0.5252 0.0065 -0.0089 0.0111  
 -0.0124 -0.0129 -0.0003 0.0017

112. (1.97975) BD ( 1) C 47 - C 57  
 ( 51.04%) 0.7144\* C 47 s( 26.39%)p 2.79( 73.57%)d 0.00( 0.04%)  
 -0.0001 0.5136 -0.0115 0.0020 -0.0004  
 -0.4881 -0.0114 -0.0033 -0.5405 0.0046  
 -0.0014 -0.4528 0.0053 -0.0020 0.0124  
 0.0097 0.0115 -0.0027 -0.0006  
 ( 48.96%) 0.6997\* C 57 s( 29.01%)p 2.45( 70.94%)d 0.00( 0.05%)  
 0.0002 0.5382 -0.0202 -0.0029 0.0000  
 0.5103 0.0053 -0.0120 0.4975 0.0106  
 -0.0068 0.4483 0.0050 -0.0073 0.0139  
 0.0123 0.0117 0.0007 -0.0021

113. (1.95741) BD ( 1) C 47 - H 80  
 ( 63.35%) 0.7959\* C 47 s( 21.87%)p 3.57( 78.08%)d 0.00( 0.05%)  
 0.0001 -0.4673 -0.0194 0.0039 0.0000  
 0.5302 -0.0013 -0.0029 -0.5421 0.0107  
 0.0021 -0.4533 0.0094 0.0071 0.0137  
 0.0119 -0.0123 0.0010 0.0018  
 ( 36.65%) 0.6054\* H 80 s( 99.95%)p 0.00( 0.05%)  
 -0.9997 0.0068 -0.0009 -0.0164 0.0118  
 0.0100

114. (1.98559) BD ( 1) C 48 - H 126  
 ( 60.94%) 0.7807\* C 48 s( 23.30%)p 3.29( 76.66%)d 0.00( 0.04%)  
 0.0001 -0.4827 -0.0059 -0.0020 -0.0001  
 0.5128 -0.0049 -0.0032 -0.4359 0.0020  
 -0.0064 0.5599 -0.0050 0.0055 0.0111  
 -0.0139 0.0110 -0.0012 -0.0022  
 ( 39.06%) 0.6250\* H 126 s( 99.96%)p 0.00( 0.04%)  
 -0.9998 -0.0016 -0.0002 -0.0143 0.0089

-0.0115

115. (1.98706) BD ( 1) C 48 - H 127  
( 60.67%) 0.7789\* C 48 s( 24.01%)p 3.16( 75.94%)d 0.00( 0.05%)  
0.0000 0.4899 0.0038 0.0015 -0.0001  
0.4783 -0.0029 0.0042 0.5823 -0.0008  
0.0058 0.4376 -0.0025 -0.0072 0.0126  
0.0115 0.0138 -0.0024 -0.0038  
( 39.33%) 0.6272\* H 127 s( 99.96%)p 0.00( 0.04%)  
0.9998 0.0016 0.0000 -0.0094 -0.0139  
-0.0122

116. (1.98982) BD ( 1) C 48 - H 128  
( 60.43%) 0.7774\* C 48 s( 23.65%)p 3.23( 76.31%)d 0.00( 0.05%)  
-0.0001 0.4862 0.0077 0.0000 0.0000  
0.5408 0.0011 0.0065 -0.5023 0.0043  
0.0042 -0.4672 0.0000 -0.0061 -0.0135  
-0.0111 0.0119 0.0021 -0.0015  
( 39.57%) 0.6290\* H 128 s( 99.95%)p 0.00( 0.05%)  
0.9998 0.0023 0.0002 -0.0126 0.0141  
0.0110

117. (1.97532) BD ( 1) C 49 - C 50  
( 50.69%) 0.7120\* C 49 s( 25.91%)p 2.86( 74.05%)d 0.00( 0.04%)  
-0.0001 0.5089 -0.0121 0.0007 0.0000  
0.8477 0.0045 0.0039 0.1466 0.0136  
0.0017 0.0129 0.0021 0.0017 0.0045  
-0.0004 0.0006 0.0162 -0.0095  
( 49.31%) 0.7022\* C 50 s( 29.25%)p 2.42( 70.71%)d 0.00( 0.05%)  
0.0003 0.5405 -0.0189 -0.0035 0.0001  
-0.8273 -0.0121 0.0145 -0.1479 0.0011  
0.0049 -0.0197 0.0025 0.0008 0.0068  
0.0005 0.0002 0.0170 -0.0107

118. (1.97545) BD ( 1) C 49 - C 58  
( 51.06%) 0.7146\* C 49 s( 26.33%)p 2.80( 73.64%)d 0.00( 0.04%)  
-0.0001 0.5130 -0.0114 0.0010 0.0001  
-0.2341 -0.0099 0.0001 -0.4865 0.0074  
-0.0017 0.6668 0.0074 0.0067 0.0055  
-0.0063 -0.0149 -0.0048 0.0069  
( 48.94%) 0.6996\* C 58 s( 29.00%)p 2.45( 70.96%)d 0.00( 0.05%)  
0.0003 0.5383 -0.0139 0.0007 -0.0004  
0.2375 0.0047 -0.0061 0.4655 0.0082  
-0.0040 -0.6605 -0.0035 0.0083 0.0059  
-0.0087 -0.0158 -0.0042 0.0090

119. (1.96417) BD ( 1) C 49 - H 79  
( 61.47%) 0.7840\* C 49 s( 21.13%)p 3.73( 78.82%)d 0.00( 0.05%)  
-0.0002 0.4592 0.0199 -0.0003 0.0001  
-0.4117 0.0059 0.0063 0.7829 -0.0133  
-0.0022 0.0741 0.0010 0.0059 -0.0162  
-0.0014 0.0028 -0.0113 -0.0113  
( 38.53%) 0.6207\* H 79 s( 99.95%)p 0.00( 0.05%)  
0.9998 0.0054 0.0001 0.0108 -0.0183  
-0.0007

120. (1.98629) BD ( 1) C 50 - H 129  
( 60.74%) 0.7793\* C 50 s( 23.28%)p 3.29( 76.68%)d 0.00( 0.04%)  
-0.0001 0.4824 0.0052 0.0022 0.0001  
0.2253 0.0008 0.0084 0.4023 -0.0020  
0.0031 0.7444 -0.0062 0.0012 0.0041  
0.0082 0.0138 -0.0034 0.0125  
( 39.26%) 0.6266\* H 129 s( 99.96%)p 0.00( 0.04%)  
0.9998 0.0015 0.0002 -0.0034 -0.0096  
-0.0183

121. (1.98839) BD ( 1) C 50 - H 130  
( 60.58%) 0.7783\* C 50 s( 23.73%)p 3.21( 76.22%)d 0.00( 0.05%)  
0.0000 0.4871 0.0069 0.0001 -0.0001  
0.4523 0.0047 0.0092 -0.7450 0.0039  
0.0006 -0.0499 -0.0012 -0.0002 -0.0169  
-0.0011 0.0018 -0.0089 -0.0092  
( 39.42%) 0.6279\* H 130 s( 99.95%)p 0.00( 0.05%)  
0.9998 0.0023 0.0002 -0.0099 0.0191  
0.0016

122. (1.98804) BD ( 1) C 50 - H 131  
( 60.81%) 0.7798\* C 50 s( 23.75%)p 3.21( 76.21%)d 0.00( 0.05%)  
-0.0001 0.4873 0.0045 0.0015 -0.0001



|      |           |         |              |                                          |         |         |         |         |         |
|------|-----------|---------|--------------|------------------------------------------|---------|---------|---------|---------|---------|
|      |           |         |              |                                          | 0.2428  | 0.0013  | 0.0091  | 0.5105  | -0.0030 |
|      |           |         |              |                                          | 0.0027  | -0.6651 | 0.0042  | 0.0005  | 0.0055  |
|      |           |         |              |                                          | -0.0083 | -0.0156 | -0.0064 | 0.0086  |         |
|      | ( 39.19%) | 0.6260* | H 131        | s ( 99.96%)p 0.00( 0.04%)                |         |         |         |         |         |
|      |           |         |              |                                          | 0.9998  | 0.0013  | 0.0001  | -0.0050 | -0.0122 |
|      |           |         |              |                                          | 0.0157  |         |         |         |         |
| 123. | (1.97541) | BD ( 1) | C 51 - C 52  |                                          |         |         |         |         |         |
|      | ( 50.70%) | 0.7120* | C 51         | s ( 25.89%)p 2.86( 74.08%)d 0.00( 0.04%) |         |         |         |         |         |
|      |           |         |              |                                          | -0.0001 | 0.5087  | -0.0118 | 0.0006  | 0.0000  |
|      |           |         |              |                                          | 0.5288  | 0.0133  | 0.0036  | 0.6263  | 0.0001  |
|      |           |         |              |                                          | 0.0006  | 0.2621  | -0.0059 | 0.0016  | 0.0145  |
|      |           |         |              |                                          | 0.0063  | 0.0076  | -0.0037 | -0.0071 |         |
|      | ( 49.30%) | 0.7022* | C 52         | s ( 29.26%)p 2.42( 70.70%)d 0.00( 0.04%) |         |         |         |         |         |
|      |           |         |              |                                          | 0.0003  | 0.5406  | -0.0187 | -0.0032 | 0.0001  |
|      |           |         |              |                                          | -0.5262 | -0.0040 | 0.0109  | -0.6035 | -0.0111 |
|      |           |         |              |                                          | 0.0100  | -0.2560 | -0.0041 | 0.0035  | 0.0166  |
|      |           |         |              |                                          | 0.0066  | 0.0077  | -0.0022 | -0.0079 |         |
| 124. | (1.97561) | BD ( 1) | C 51 - C 59  |                                          |         |         |         |         |         |
|      | ( 51.02%) | 0.7143* | C 51         | s ( 26.38%)p 2.79( 73.58%)d 0.00( 0.04%) |         |         |         |         |         |
|      |           |         |              |                                          | -0.0001 | 0.5135  | -0.0118 | 0.0012  | 0.0000  |
|      |           |         |              |                                          | -0.2026 | 0.0029  | 0.0020  | -0.5190 | -0.0130 |
|      |           |         |              |                                          | -0.0038 | 0.6521  | -0.0027 | 0.0054  | 0.0049  |
|      |           |         |              |                                          | -0.0062 | -0.0148 | -0.0042 | 0.0073  |         |
|      | ( 48.98%) | 0.6999* | C 59         | s ( 28.97%)p 2.45( 70.99%)d 0.00( 0.05%) |         |         |         |         |         |
|      |           |         |              |                                          | 0.0003  | 0.5379  | -0.0183 | -0.0028 | 0.0001  |
|      |           |         |              |                                          | 0.1861  | 0.0069  | -0.0027 | 0.5215  | 0.0055  |
|      |           |         |              |                                          | -0.0103 | -0.6348 | -0.0075 | 0.0083  | 0.0053  |
|      |           |         |              |                                          | -0.0064 | -0.0175 | -0.0064 | 0.0071  |         |
| 125. | (1.96408) | BD ( 1) | C 51 - H 81  |                                          |         |         |         |         |         |
|      | ( 61.45%) | 0.7839* | C 51         | s ( 21.11%)p 3.73( 78.83%)d 0.00( 0.05%) |         |         |         |         |         |
|      |           |         |              |                                          | -0.0002 | 0.4591  | 0.0199  | -0.0002 | 0.0001  |
|      |           |         |              |                                          | 0.4307  | -0.0066 | 0.0046  | -0.4807 | 0.0063  |
|      |           |         |              |                                          | 0.0017  | -0.6095 | 0.0112  | 0.0073  | -0.0105 |
|      |           |         |              |                                          | -0.0134 | 0.0148  | -0.0009 | 0.0047  |         |
|      | ( 38.55%) | 0.6209* | H 81         | s ( 99.95%)p 0.00( 0.05%)                |         |         |         |         |         |
|      |           |         |              |                                          | 0.9998  | 0.0053  | 0.0003  | -0.0094 | 0.0114  |
|      |           |         |              |                                          | 0.0157  |         |         |         |         |
| 126. | (1.98624) | BD ( 1) | C 52 - H 114 |                                          |         |         |         |         |         |
|      | ( 60.73%) | 0.7793* | C 52         | s ( 23.27%)p 3.30( 76.69%)d 0.00( 0.04%) |         |         |         |         |         |
|      |           |         |              |                                          | -0.0001 | 0.4824  | 0.0049  | 0.0019  | 0.0002  |
|      |           |         |              |                                          | 0.7336  | -0.0036 | 0.0070  | -0.3472 | 0.0045  |
|      |           |         |              |                                          | 0.0056  | 0.3286  | -0.0026 | 0.0021  | -0.0125 |
|      |           |         |              |                                          | 0.0111  | -0.0057 | 0.0102  | -0.0053 |         |
|      | ( 39.27%) | 0.6266* | H 114        | s ( 99.96%)p 0.00( 0.04%)                |         |         |         |         |         |
|      |           |         |              |                                          | 0.9998  | 0.0015  | 0.0002  | -0.0170 | 0.0101  |
|      |           |         |              |                                          | -0.0074 |         |         |         |         |
| 127. | (1.98831) | BD ( 1) | C 52 - H 115 |                                          |         |         |         |         |         |
|      | ( 60.84%) | 0.7800* | C 52         | s ( 23.73%)p 3.21( 76.23%)d 0.00( 0.05%) |         |         |         |         |         |
|      |           |         |              |                                          | -0.0001 | 0.4871  | 0.0049  | 0.0015  | -0.0001 |
|      |           |         |              |                                          | 0.2238  | -0.0001 | 0.0067  | 0.5221  | -0.0009 |
|      |           |         |              |                                          | 0.0061  | -0.6629 | 0.0057  | 0.0021  | 0.0040  |
|      |           |         |              |                                          | -0.0078 | -0.0171 | -0.0052 | 0.0073  |         |
|      | ( 39.16%) | 0.6258* | H 115        | s ( 99.96%)p 0.00( 0.04%)                |         |         |         |         |         |
|      |           |         |              |                                          | 0.9998  | 0.0012  | 0.0001  | -0.0049 | -0.0122 |
|      |           |         |              |                                          | 0.0160  |         |         |         |         |
| 128. | (1.98844) | BD ( 1) | C 52 - H 116 |                                          |         |         |         |         |         |
|      | ( 60.58%) | 0.7783* | C 52         | s ( 23.74%)p 3.21( 76.21%)d 0.00( 0.05%) |         |         |         |         |         |
|      |           |         |              |                                          | 0.0000  | 0.4872  | 0.0066  | 0.0001  | -0.0001 |
|      |           |         |              |                                          | -0.3660 | 0.0049  | 0.0048  | 0.4916  | 0.0039  |
|      |           |         |              |                                          | 0.0069  | 0.6215  | -0.0014 | 0.0034  | -0.0098 |
|      |           |         |              |                                          | -0.0107 | 0.0141  | -0.0030 | 0.0062  |         |
|      | ( 39.42%) | 0.6279* | H 116        | s ( 99.95%)p 0.00( 0.05%)                |         |         |         |         |         |
|      |           |         |              |                                          | 0.9998  | 0.0023  | 0.0002  | 0.0102  | -0.0118 |
|      |           |         |              |                                          | -0.0149 |         |         |         |         |
| 129. | (1.96921) | BD ( 1) | C 53 - C 54  |                                          |         |         |         |         |         |
|      | ( 50.53%) | 0.7109* | C 53         | s ( 25.43%)p 2.93( 74.53%)d 0.00( 0.04%) |         |         |         |         |         |
|      |           |         |              |                                          | -0.0001 | 0.5041  | -0.0116 | 0.0012  | -0.0002 |
|      |           |         |              |                                          | 0.4120  | 0.0070  | 0.0017  | 0.6126  | -0.0008 |
|      |           |         |              |                                          | 0.0013  | -0.4473 | -0.0101 | -0.0040 | 0.0131  |
|      |           |         |              |                                          | -0.0073 | -0.0118 | -0.0058 | -0.0031 |         |
|      | ( 49.47%) | 0.7033* | C 54         | s ( 29.16%)p 2.43( 70.79%)d 0.00( 0.04%) |         |         |         |         |         |

|      |           |           |         |       |            |                 |                |         |         |
|------|-----------|-----------|---------|-------|------------|-----------------|----------------|---------|---------|
|      |           |           |         |       | 0.0004     | 0.5397          | -0.0197        | -0.0026 | 0.0001  |
|      |           |           |         |       | -0.3913    | -0.0065         | 0.0080         | -0.5986 | -0.0106 |
|      |           |           |         |       | 0.0085     | 0.4428          | 0.0038         | -0.0097 | 0.0122  |
|      |           |           |         |       | -0.0092    | -0.0136         | -0.0052        | -0.0016 |         |
| 130. | (1.97956) | BD ( 1) C | 53 - C  | 60    |            |                 |                |         |         |
|      | ( 51.23%) |           | 0.7158* | C 53  | s( 26.68%) | p 2.75( 73.28%) | d 0.00( 0.04%) |         |         |
|      |           |           |         |       | -0.0001    | 0.5164          | -0.0111        | 0.0030  | -0.0003 |
|      |           |           |         |       | -0.8357    | 0.0002          | -0.0037        | 0.0020  | -0.0130 |
|      |           |           |         |       | -0.0010    | -0.1850         | -0.0039        | -0.0027 | -0.0012 |
|      |           |           |         |       | 0.0066     | -0.0012         | 0.0163         | -0.0085 |         |
|      | ( 48.77%) |           | 0.6984* | C 60  | s( 28.89%) | p 2.46( 71.06%) | d 0.00( 0.05%) |         |         |
|      |           |           |         |       | 0.0002     | 0.5372          | -0.0153        | -0.0008 | -0.0003 |
|      |           |           |         |       | 0.8143     | 0.0103          | -0.0109        | 0.0251  | 0.0000  |
|      |           |           |         |       | -0.0036    | 0.2162          | -0.0030        | -0.0031 | 0.0017  |
|      |           |           |         |       | 0.0094     | 0.0008          | 0.0178         | -0.0091 |         |
| 131. | (1.95860) | BD ( 1) C | 53 - H  | 82    |            |                 |                |         |         |
|      | ( 62.84%) |           | 0.7927* | C 53  | s( 21.59%) | p 3.63( 78.36%) | d 0.00( 0.05%) |         |         |
|      |           |           |         |       | 0.0002     | -0.4642         | -0.0196        | 0.0045  | 0.0001  |
|      |           |           |         |       | -0.3373    | 0.0117          | 0.0022         | 0.7826  | -0.0088 |
|      |           |           |         |       | -0.0066    | 0.2390          | -0.0015        | 0.0035  | 0.0136  |
|      |           |           |         |       | 0.0042     | -0.0084         | 0.0116         | 0.0090  |         |
|      | ( 37.16%) |           | 0.6096* | H 82  | s( 99.95%) | p 0.00( 0.05%)  |                |         |         |
|      |           |           |         |       | -0.9997    | 0.0062          | -0.0008        | 0.0052  | -0.0204 |
|      |           |           |         |       | -0.0064    |                 |                |         |         |
| 132. | (1.98561) | BD ( 1) C | 54 - H  | 117   |            |                 |                |         |         |
|      | ( 60.91%) |           | 0.7804* | C 54  | s( 23.30%) | p 3.29( 76.66%) | d 0.00( 0.04%) |         |         |
|      |           |           |         |       | 0.0002     | -0.4826         | -0.0057        | -0.0020 | -0.0001 |
|      |           |           |         |       | 0.1218     | -0.0024         | -0.0046        | 0.1206  | -0.0013 |
|      |           |           |         |       | -0.0045    | 0.8585          | -0.0068        | 0.0062  | 0.0001  |
|      |           |           |         |       | -0.0048    | -0.0054         | -0.0005        | -0.0198 |         |
|      | ( 39.09%) |           | 0.6252* | H 117 | s( 99.96%) | p 0.00( 0.04%)  |                |         |         |
|      |           |           |         |       | -0.9998    | -0.0016         | -0.0002        | -0.0044 | -0.0051 |
|      |           |           |         |       | -0.0192    |                 |                |         |         |
| 133. | (1.98955) | BD ( 1) C | 54 - H  | 118   |            |                 |                |         |         |
|      | ( 60.47%) |           | 0.7777* | C 54  | s( 23.65%) | p 3.23( 76.30%) | d 0.00( 0.05%) |         |         |
|      |           |           |         |       | 0.0000     | 0.4863          | 0.0077         | -0.0003 | 0.0000  |
|      |           |           |         |       | -0.3074    | 0.0038          | 0.0041         | 0.7912  | 0.0001  |
|      |           |           |         |       | 0.0079     | 0.2058          | -0.0023        | -0.0041 | -0.0116 |
|      |           |           |         |       | -0.0016    | 0.0086          | -0.0127        | -0.0087 |         |
|      | ( 39.53%) |           | 0.6287* | H 118 | s( 99.95%) | p 0.00( 0.05%)  |                |         |         |
|      |           |           |         |       | 0.9998     | 0.0024          | 0.0002         | 0.0090  | -0.0189 |
|      |           |           |         |       | -0.0062    |                 |                |         |         |
| 134. | (1.98730) | BD ( 1) C | 54 - H  | 119   |            |                 |                |         |         |
|      | ( 60.54%) |           | 0.7781* | C 54  | s( 23.89%) | p 3.18( 76.06%) | d 0.00( 0.05%) |         |         |
|      |           |           |         |       | 0.0000     | 0.4887          | 0.0041         | 0.0013  | -0.0001 |
|      |           |           |         |       | 0.8584     | -0.0030         | 0.0039         | -0.0069 | -0.0003 |
|      |           |           |         |       | 0.0068     | 0.1538          | -0.0025        | -0.0064 | -0.0010 |
|      |           |           |         |       | 0.0071     | 0.0021          | 0.0185         | -0.0098 |         |
|      | ( 39.46%) |           | 0.6282* | H 119 | s( 99.96%) | p 0.00( 0.04%)  |                |         |         |
|      |           |           |         |       | 0.9998     | 0.0015          | 0.0000         | -0.0201 | 0.0025  |
|      |           |           |         |       | -0.0038    |                 |                |         |         |
| 135. | (1.98449) | BD ( 1) C | 55 - H  | 108   |            |                 |                |         |         |
|      | ( 60.68%) |           | 0.7790* | C 55  | s( 23.12%) | p 3.32( 76.84%) | d 0.00( 0.04%) |         |         |
|      |           |           |         |       | -0.0002    | 0.4808          | 0.0082         | 0.0040  | 0.0002  |
|      |           |           |         |       | -0.6195    | 0.0084          | -0.0010        | 0.5849  | -0.0036 |
|      |           |           |         |       | 0.0137     | 0.2050          | -0.0088        | 0.0044  | -0.0172 |
|      |           |           |         |       | -0.0052    | 0.0061          | 0.0019         | -0.0080 |         |
|      | ( 39.32%) |           | 0.6271* | H 108 | s( 99.96%) | p 0.00( 0.04%)  |                |         |         |
|      |           |           |         |       | 0.9998     | 0.0014          | 0.0004         | 0.0156  | -0.0129 |
|      |           |           |         |       | -0.0053    |                 |                |         |         |
| 136. | (1.98741) | BD ( 1) C | 55 - H  | 109   |            |                 |                |         |         |
|      | ( 60.54%) |           | 0.7781* | C 55  | s( 23.70%) | p 3.22( 76.26%) | d 0.00( 0.04%) |         |         |
|      |           |           |         |       | 0.0000     | 0.4867          | 0.0104         | 0.0020  | -0.0001 |
|      |           |           |         |       | 0.6609     | 0.0017          | 0.0052         | 0.1029  | 0.0056  |
|      |           |           |         |       | 0.0091     | 0.5612          | -0.0090        | 0.0058  | 0.0022  |
|      |           |           |         |       | 0.0172     | 0.0035          | 0.0106         | 0.0021  |         |
|      | ( 39.46%) |           | 0.6281* | H 109 | s( 99.95%) | p 0.00( 0.05%)  |                |         |         |
|      |           |           |         |       | 0.9998     | 0.0022          | 0.0005         | -0.0161 | -0.0015 |
|      |           |           |         |       | -0.0143    |                 |                |         |         |
| 137. | (1.98644) | BD ( 1) C | 55 - H  | 110   |            |                 |                |         |         |
|      | ( 62.17%) |           | 0.7885* | C 55  | s( 24.50%) | p 3.08( 75.45%) | d 0.00( 0.05%) |         |         |

-0.0001 0.4949 -0.0072 -0.0057 0.0004  
0.2873 0.0032 -0.0034 0.1782 0.0096  
0.0006 -0.7999 -0.0022 0.0116 0.0025  
-0.0118 -0.0074 0.0015 0.0174  
( 37.83%) 0.6151\* H 110 s( 99.96%)p 0.00( 0.04%)  
0.9998 0.0013 0.0005 -0.0067 -0.0041  
0.0190

138. (1.98436) BD ( 1) C 56 - H 102  
( 60.79%) 0.7796\* C 56 s( 23.09%)p 3.33( 76.87%)d 0.00( 0.04%)  
0.0001 -0.4804 -0.0089 0.0041 -0.0003  
0.1249 -0.0045 -0.0059 0.4190 -0.0112  
0.0062 0.7598 -0.0050 0.0113 -0.0016  
-0.0052 -0.0150 0.0034 -0.0124  
( 39.21%) 0.6262\* H 102 s( 99.96%)p 0.00( 0.04%)  
-0.9998 -0.0012 -0.0004 -0.0046 -0.0103  
-0.0177

139. (1.98632) BD ( 1) C 56 - H 103  
( 62.31%) 0.7894\* C 56 s( 24.65%)p 3.05( 75.30%)d 0.00( 0.05%)  
-0.0001 0.4964 -0.0083 0.0062 0.0004  
0.1525 0.0073 -0.0016 0.8364 0.0016  
-0.0132 -0.1727 -0.0074 0.0005 0.0066  
-0.0012 -0.0073 -0.0176 -0.0098  
( 37.69%) 0.6139\* H 103 s( 99.96%)p 0.00( 0.04%)  
0.9998 0.0011 0.0006 -0.0026 -0.0199  
0.0040

140. (1.98716) BD ( 1) C 56 - H 104  
( 60.37%) 0.7770\* C 56 s( 23.63%)p 3.23( 76.33%)d 0.00( 0.04%)  
0.0000 0.4860 0.0113 -0.0023 -0.0002  
0.7103 0.0046 0.0105 -0.3397 0.0091  
-0.0063 0.3781 -0.0071 -0.0016 -0.0117  
0.0129 -0.0048 0.0092 -0.0039  
( 39.63%) 0.6295\* H 104 s( 99.95%)p 0.00( 0.05%)  
0.9998 0.0021 0.0004 -0.0171 0.0087  
-0.0098

141. (1.98474) BD ( 1) C 57 - H 123  
( 61.50%) 0.7842\* C 57 s( 23.50%)p 3.25( 76.46%)d 0.00( 0.04%)  
0.0001 -0.4847 -0.0041 -0.0020 -0.0001  
0.5723 0.0021 0.0032 -0.4761 0.0065  
0.0046 0.4584 -0.0106 0.0079 0.0142  
-0.0113 0.0100 -0.0025 0.0011  
( 38.50%) 0.6205\* H 123 s( 99.96%)p 0.00( 0.04%)  
-0.9998 -0.0012 -0.0004 -0.0127 0.0134  
-0.0083

142. (1.98872) BD ( 1) C 57 - H 124  
( 59.98%) 0.7745\* C 57 s( 23.56%)p 3.24( 76.39%)d 0.00( 0.04%)  
0.0000 -0.4854 -0.0081 -0.0006 -0.0002  
-0.4578 0.0030 0.0070 0.4864 0.0027  
0.0058 0.5635 0.0010 0.0083 0.0117  
0.0125 -0.0117 0.0013 -0.0034  
( 40.02%) 0.6326\* H 124 s( 99.95%)p 0.00( 0.05%)  
-0.9998 -0.0023 -0.0003 0.0119 -0.0110  
-0.0138

143. (1.98684) BD ( 1) C 57 - H 125  
( 61.30%) 0.7829\* C 57 s( 23.93%)p 3.18( 76.03%)d 0.00( 0.05%)  
0.0001 -0.4891 -0.0053 -0.0007 0.0002  
0.4490 0.0059 0.0027 0.5368 -0.0079  
0.0076 -0.5200 0.0042 0.0040 -0.0100  
0.0131 0.0132 0.0020 -0.0001  
( 38.70%) 0.6221\* H 125 s( 99.96%)p 0.00( 0.04%)  
-0.9998 -0.0011 -0.0002 -0.0108 -0.0112  
0.0135

144. (1.98532) BD ( 1) C 58 - H 132  
( 60.64%) 0.7787\* C 58 s( 23.09%)p 3.33( 76.87%)d 0.00( 0.04%)  
-0.0001 0.4804 0.0080 0.0036 0.0002  
0.2234 -0.0081 0.0016 0.3950 -0.0048  
-0.0023 0.7500 -0.0068 0.0126 0.0032  
0.0085 0.0141 -0.0025 0.0120  
( 39.36%) 0.6274\* H 132 s( 99.96%)p 0.00( 0.04%)  
0.9998 0.0014 0.0004 -0.0059 -0.0111  
-0.0167

145. (1.98713) BD ( 1) C 58 - H 133

|      |           |         |              |                                         |                                         |                                        |                                         |                                 |
|------|-----------|---------|--------------|-----------------------------------------|-----------------------------------------|----------------------------------------|-----------------------------------------|---------------------------------|
|      | ( 61.82%) | 0.7863* | C 58         | s( 24.40%)p 3.10( 75.55%)d 0.00( 0.05%) | 0.0001 -0.4939 0.0070 0.0052 -0.0004    | 0.8601 0.0056 -0.0119 0.1241 0.0047    | -0.0003 -0.0054 -0.0077 -0.0028 -0.0057 | 0.0005 -0.0003 -0.0187 0.0115   |
|      | ( 38.18%) | 0.6179* | H 133        | s( 99.96%)p 0.00( 0.04%)                | -0.9998 -0.0014 -0.0005 -0.0201 -0.0021 | -0.0004                                |                                         |                                 |
| 146. | (1.98795) | BD ( 1) | C 58 - H 134 |                                         |                                         |                                        |                                         |                                 |
|      | ( 60.31%) | 0.7766* | C 58         | s( 23.52%)p 3.25( 76.43%)d 0.00( 0.04%) | 0.0000 -0.4849 -0.0112 -0.0019 0.0002   | -0.3910 0.0078 -0.0021 0.7816 -0.0017  | 0.0107 0.0156 -0.0035 -0.0073 0.0146    | -0.0010 -0.0014 0.0108 0.0106   |
|      | ( 39.69%) | 0.6300* | H 134        | s( 99.95%)p 0.00( 0.05%)                | -0.9998 -0.0022 -0.0004 0.0102 -0.0189  | -0.0016                                |                                         |                                 |
| 147. | (1.98540) | BD ( 1) | C 59 - H 111 |                                         |                                         |                                        |                                         |                                 |
|      | ( 60.59%) | 0.7784* | C 59         | s( 23.12%)p 3.32( 76.83%)d 0.00( 0.04%) | -0.0001 0.4808 0.0062 0.0028 0.0002     | 0.7326 -0.0062 -0.0007 -0.3229 -0.0010 | -0.0064 0.3567 -0.0033 0.0094 -0.0117   | 0.0122 -0.0040 0.0104 -0.0051   |
|      | ( 39.41%) | 0.6278* | H 111        | s( 99.96%)p 0.00( 0.04%)                | 0.9998 0.0015 0.0003 -0.0185 0.0068     | -0.0076                                |                                         |                                 |
| 148. | (1.98797) | BD ( 1) | C 59 - H 112 |                                         |                                         |                                        |                                         |                                 |
|      | ( 60.42%) | 0.7773* | C 59         | s( 23.63%)p 3.23( 76.33%)d 0.00( 0.04%) | 0.0000 0.4861 0.0067 0.0010 0.0000      | -0.4396 -0.0039 -0.0004 0.4197 -0.0069 | -0.0036 0.6274 0.0004 0.0087 -0.0091    | -0.0121 0.0129 0.0015 0.0056    |
|      | ( 39.58%) | 0.6291* | H 112        | s( 99.95%)p 0.00( 0.05%)                | 0.9998 0.0022 0.0004 0.0106 -0.0117     | -0.0148                                |                                         |                                 |
| 149. | (1.98638) | BD ( 1) | C 59 - H 113 |                                         |                                         |                                        |                                         |                                 |
|      | ( 61.73%) | 0.7857* | C 59         | s( 24.28%)p 3.12( 75.68%)d 0.00( 0.05%) | 0.0001 -0.4927 -0.0030 0.0004 0.0002    | 0.4846 0.0001 -0.0024 0.6685 -0.0025   | 0.0050 0.2739 -0.0040 -0.0062 -0.0150   | -0.0067 -0.0093 0.0044 0.0090   |
|      | ( 38.27%) | 0.6186* | H 113        | s( 99.96%)p 0.00( 0.04%)                | -0.9998 -0.0012 0.0001 -0.0108 -0.0140  | -0.0087                                |                                         |                                 |
| 150. | (1.98440) | BD ( 1) | C 60 - H 120 |                                         |                                         |                                        |                                         |                                 |
|      | ( 61.42%) | 0.7837* | C 60         | s( 23.28%)p 3.29( 76.67%)d 0.00( 0.04%) | 0.0001 -0.4824 -0.0097 -0.0039 0.0000   | 0.0866 0.0017 0.0098 0.1992 0.0066     | -0.0015 0.8480 -0.0147 0.0107 0.0006    | -0.0031 -0.0079 0.0023 -0.0189  |
|      | ( 38.58%) | 0.6211* | H 120        | s( 99.96%)p 0.00( 0.04%)                | -0.9998 -0.0010 -0.0004 0.0003 -0.0066  | -0.0194                                |                                         |                                 |
| 151. | (1.98692) | BD ( 1) | C 60 - H 121 |                                         |                                         |                                        |                                         |                                 |
|      | ( 61.76%) | 0.7859* | C 60         | s( 24.34%)p 3.11( 75.61%)d 0.00( 0.05%) | -0.0001 0.4933 -0.0075 -0.0046 0.0002   | -0.4301 -0.0099 0.0043 -0.5960 -0.0072 | 0.0087 0.4643 -0.0061 -0.0081 0.0134    | -0.0108 -0.0142 -0.0045 -0.0019 |
|      | ( 38.24%) | 0.6184* | H 121        | s( 99.96%)p 0.00( 0.04%)                | 0.9998 0.0011 0.0005 0.0084 0.0155      | -0.0093                                |                                         |                                 |
| 152. | (1.98826) | BD ( 1) | C 60 - H 122 |                                         |                                         |                                        |                                         |                                 |
|      | ( 59.83%) | 0.7735* | C 60         | s( 23.50%)p 3.25( 76.46%)d 0.00( 0.04%) | 0.0000 0.4846 0.0110 0.0022 0.0001      | -0.3784 -0.0047 -0.0115 0.7770 -0.0058 | 0.0074 0.1321 0.0001 -0.0044 -0.0143    | -0.0025 0.0044 -0.0116 -0.0083  |
|      | ( 40.17%) | 0.6338* | H 122        | s( 99.95%)p 0.00( 0.05%)                | 0.9998 0.0022 0.0004 0.0079 -0.0195     | -0.0032                                |                                         |                                 |

153. (1.98496) BD ( 1) C 61 - H 96  
( 60.62%) 0.7786\* C 61 s( 23.12%)p 3.32( 76.84%)d 0.00( 0.04%)  
-0.0001 0.4807 0.0079 0.0038 0.0002  
-0.0046 0.0065 0.0014 0.2164 -0.0009  
0.0106 0.8493 -0.0096 0.0083 -0.0013  
-0.0001 0.0080 -0.0012 0.0189  
( 39.38%) 0.6276\* H 96 s( 99.96%)p 0.00( 0.04%)  
0.9998 0.0014 0.0004 0.0009 -0.0037  
-0.0205

154. (1.98679) BD ( 1) C 61 - H 97  
( 61.97%) 0.7872\* C 61 s( 24.44%)p 3.09( 75.51%)d 0.00( 0.05%)  
-0.0001 0.4943 -0.0071 -0.0055 0.0004  
0.8263 0.0065 -0.0111 -0.0357 0.0087  
0.0030 -0.2660 0.0016 0.0048 -0.0014  
-0.0112 0.0003 0.0177 -0.0078  
( 38.03%) 0.6167\* H 97 s( 99.96%)p 0.00( 0.04%)  
0.9998 0.0014 0.0005 -0.0195 0.0012  
0.0061

155. (1.98764) BD ( 1) C 61 - H 98  
( 60.49%) 0.7777\* C 61 s( 23.60%)p 3.24( 76.36%)d 0.00( 0.04%)  
0.0000 0.4857 0.0110 0.0019 -0.0002  
-0.4043 0.0101 -0.0012 0.6376 0.0009  
0.0127 -0.4397 0.0012 -0.0006 -0.0130  
0.0080 -0.0128 -0.0059 -0.0014  
( 39.51%) 0.6286\* H 98 s( 99.95%)p 0.00( 0.05%)  
0.9998 0.0021 0.0003 0.0107 -0.0148  
0.0114

156. (1.98463) BD ( 1) C 62 - H 87  
( 60.62%) 0.7786\* C 62 s( 22.95%)p 3.36( 77.01%)d 0.00( 0.04%)  
-0.0001 0.4790 0.0048 0.0031 0.0001  
0.4665 0.0025 0.0026 -0.7245 0.0094  
-0.0016 -0.1651 -0.0002 -0.0088 -0.0160  
-0.0020 0.0059 -0.0077 -0.0091  
( 39.38%) 0.6276\* H 87 s( 99.96%)p 0.00( 0.04%)  
0.9998 0.0010 0.0004 -0.0104 0.0174  
0.0020

157. (1.98761) BD ( 1) C 62 - H 88  
( 60.03%) 0.7748\* C 62 s( 23.44%)p 3.26( 76.52%)d 0.00( 0.05%)  
0.0000 0.4841 0.0073 0.0009 0.0001  
-0.6110 0.0038 0.0039 0.0685 0.0033  
-0.0011 -0.6221 -0.0039 -0.0118 -0.0025  
0.0190 -0.0006 0.0079 0.0045  
( 39.97%) 0.6322\* H 88 s( 99.96%)p 0.00( 0.04%)  
0.9998 0.0022 0.0003 0.0154 -0.0015  
0.0145

158. (1.98595) BD ( 1) C 62 - H 89  
( 63.18%) 0.7948\* C 62 s( 25.12%)p 2.98( 74.84%)d 0.00( 0.05%)  
-0.0001 0.5011 0.0065 -0.0008 -0.0002  
0.5279 0.0010 0.0013 0.6832 -0.0088  
0.0011 -0.0533 0.0011 -0.0090 0.0174  
0.0007 -0.0019 -0.0040 -0.0120  
( 36.82%) 0.6068\* H 89 s( 99.95%)p 0.00( 0.05%)  
0.9997 0.0022 0.0000 -0.0130 -0.0184  
-0.0042

159. (1.99867) CR ( 1) C 1  
s(100.00%)p 0.00( 0.00%)  
1.0000 0.0003 0.0000 0.0000 0.0000  
0.0000 0.0000 0.0000 -0.0001 0.0000  
0.0000 -0.0002 0.0000 0.0000 0.0000  
0.0000 0.0000 0.0000 0.0000

160. (1.99981) CR ( 1) O 2  
s(100.00%)p 0.00( 0.00%)  
1.0000 0.0003 0.0000 0.0000 0.0000  
0.0000 0.0000 0.0000 0.0001 0.0000  
0.0000 -0.0002 0.0000 0.0000 0.0000  
0.0000 0.0000 0.0000 0.0000

161. (1.99898) CR ( 1) C 3  
s(100.00%)p 0.00( 0.00%)  
1.0000 0.0002 0.0000 0.0000 0.0000  
0.0001 0.0000 0.0000 0.0002 0.0000  
0.0000 -0.0001 0.0000 0.0000 0.0000  
0.0000 0.0000 0.0000 0.0000

162. (1.99875) CR ( 1) C 4  
s(100.00%)p 0.00( 0.00%)  
1.0000 0.0004 0.0000 0.0000 0.0000

|      |           |           |    |                          |         |        |         |        |
|------|-----------|-----------|----|--------------------------|---------|--------|---------|--------|
|      |           |           |    | 0.0001                   | 0.0000  | 0.0000 | 0.0001  | 0.0000 |
|      |           |           |    | 0.0000                   | -0.0001 | 0.0000 | 0.0000  | 0.0000 |
|      |           |           |    | 0.0000                   | 0.0000  | 0.0000 | 0.0000  | 0.0000 |
| 163. | (1.99898) | CR ( 1) C | 5  | s(100.00%)               |         |        |         |        |
|      |           |           |    | 1.0000                   | 0.0002  | 0.0000 | 0.0000  | 0.0000 |
|      |           |           |    | 0.0000                   | 0.0000  | 0.0000 | 0.0000  | 0.0000 |
|      |           |           |    | 0.0000                   | 0.0001  | 0.0000 | 0.0000  | 0.0000 |
|      |           |           |    | 0.0000                   | 0.0000  | 0.0000 | 0.0000  | 0.0000 |
| 164. | (1.99910) | CR ( 1) C | 6  | s(100.00%)p 0.00( 0.00%) |         |        |         |        |
|      |           |           |    | 1.0000                   | 0.0002  | 0.0000 | 0.0000  | 0.0000 |
|      |           |           |    | 0.0000                   | 0.0000  | 0.0000 | 0.0001  | 0.0000 |
|      |           |           |    | 0.0000                   | 0.0003  | 0.0000 | 0.0000  | 0.0000 |
|      |           |           |    | 0.0000                   | 0.0000  | 0.0000 | 0.0000  | 0.0000 |
| 165. | (1.99920) | CR ( 1) C | 7  | s(100.00%)p 0.00( 0.00%) |         |        |         |        |
|      |           |           |    | 1.0000                   | 0.0002  | 0.0000 | 0.0000  | 0.0000 |
|      |           |           |    | -0.0002                  | 0.0000  | 0.0000 | 0.0002  | 0.0000 |
|      |           |           |    | 0.0000                   | 0.0002  | 0.0000 | 0.0000  | 0.0000 |
|      |           |           |    | 0.0000                   | 0.0000  | 0.0000 | 0.0000  | 0.0000 |
| 166. | (1.99910) | CR ( 1) C | 8  | s(100.00%)p 0.00( 0.00%) |         |        |         |        |
|      |           |           |    | 1.0000                   | 0.0002  | 0.0000 | 0.0000  | 0.0000 |
|      |           |           |    | -0.0003                  | 0.0000  | 0.0000 | 0.0002  | 0.0000 |
|      |           |           |    | 0.0000                   | -0.0001 | 0.0000 | 0.0000  | 0.0000 |
|      |           |           |    | 0.0000                   | 0.0000  | 0.0000 | 0.0000  | 0.0000 |
| 167. | (1.99944) | CR ( 1) N | 9  | s(100.00%)p 0.00( 0.00%) |         |        |         |        |
|      |           |           |    | 1.0000                   | 0.0002  | 0.0000 | 0.0000  | 0.0000 |
|      |           |           |    | 0.0000                   | 0.0000  | 0.0000 | 0.0000  | 0.0000 |
|      |           |           |    | 0.0000                   | 0.0001  | 0.0000 | 0.0000  | 0.0000 |
|      |           |           |    | 0.0000                   | 0.0000  | 0.0000 | 0.0000  | 0.0000 |
| 168. | (1.99868) | CR ( 1) C | 10 | s(100.00%)p 0.00( 0.00%) |         |        |         |        |
|      |           |           |    | 1.0000                   | 0.0004  | 0.0000 | 0.0000  | 0.0000 |
|      |           |           |    | 0.0000                   | 0.0000  | 0.0000 | 0.0002  | 0.0000 |
|      |           |           |    | 0.0000                   | -0.0003 | 0.0000 | 0.0000  | 0.0000 |
|      |           |           |    | 0.0000                   | 0.0000  | 0.0000 | 0.0000  | 0.0000 |
| 169. | (1.99943) | CR ( 1) N | 11 | s(100.00%)p 0.00( 0.00%) |         |        |         |        |
|      |           |           |    | 1.0000                   | 0.0002  | 0.0000 | 0.0000  | 0.0000 |
|      |           |           |    | 0.0001                   | 0.0000  | 0.0000 | 0.0000  | 0.0000 |
|      |           |           |    | 0.0000                   | 0.0001  | 0.0000 | 0.0000  | 0.0000 |
|      |           |           |    | 0.0000                   | 0.0000  | 0.0000 | 0.0000  | 0.0000 |
| 170. | (1.99903) | CR ( 1) C | 12 | s(100.00%)p 0.00( 0.00%) |         |        |         |        |
|      |           |           |    | 1.0000                   | 0.0003  | 0.0000 | 0.0000  | 0.0000 |
|      |           |           |    | 0.0002                   | 0.0000  | 0.0000 | -0.0001 | 0.0000 |
|      |           |           |    | 0.0000                   | -0.0001 | 0.0000 | 0.0000  | 0.0000 |
|      |           |           |    | 0.0000                   | 0.0000  | 0.0000 | 0.0000  | 0.0000 |
| 171. | (1.99902) | CR ( 1) C | 13 | s(100.00%)p 0.00( 0.00%) |         |        |         |        |
|      |           |           |    | 1.0000                   | 0.0003  | 0.0000 | 0.0000  | 0.0000 |
|      |           |           |    | 0.0000                   | 0.0000  | 0.0000 | 0.0002  | 0.0000 |
|      |           |           |    | 0.0000                   | 0.0000  | 0.0000 | 0.0000  | 0.0000 |
|      |           |           |    | 0.0000                   | 0.0000  | 0.0000 | 0.0000  | 0.0000 |
| 172. | (1.99760) | CR ( 1) B | 14 | s(100.00%)p 0.00( 0.00%) |         |        |         |        |
|      |           |           |    | 1.0000                   | 0.0021  | 0.0000 | 0.0000  | 0.0000 |
|      |           |           |    | -0.0016                  | 0.0000  | 0.0000 | 0.0003  | 0.0000 |
|      |           |           |    | 0.0000                   | -0.0040 | 0.0000 | 0.0000  | 0.0000 |
|      |           |           |    | 0.0001                   | 0.0000  | 0.0000 | 0.0001  | 0.0000 |
| 173. | (1.99700) | CR ( 1) B | 15 | s(100.00%)p 0.00( 0.00%) |         |        |         |        |
|      |           |           |    | 1.0000                   | 0.0011  | 0.0000 | 0.0000  | 0.0000 |
|      |           |           |    | -0.0012                  | 0.0000  | 0.0000 | -0.0002 | 0.0000 |
|      |           |           |    | 0.0000                   | -0.0007 | 0.0000 | 0.0000  | 0.0000 |
|      |           |           |    | 0.0000                   | 0.0000  | 0.0000 | 0.0000  | 0.0000 |
| 174. | (1.99876) | CR ( 1) C | 16 | s(100.00%)p 0.00( 0.00%) |         |        |         |        |
|      |           |           |    | 1.0000                   | 0.0003  | 0.0000 | 0.0000  | 0.0000 |
|      |           |           |    | -0.0002                  | 0.0000  | 0.0000 | -0.0003 | 0.0000 |
|      |           |           |    | 0.0000                   | 0.0000  | 0.0000 | 0.0000  | 0.0000 |
|      |           |           |    | 0.0000                   | 0.0000  | 0.0000 | 0.0000  | 0.0000 |
| 175. | (1.99942) | CR ( 1) N | 17 | s(100.00%)               |         |        |         |        |
|      |           |           |    | 1.0000                   | 0.0002  | 0.0000 | 0.0000  | 0.0000 |
|      |           |           |    | 0.0000                   | 0.0000  | 0.0000 | 0.0001  | 0.0000 |
|      |           |           |    | 0.0000                   | 0.0000  | 0.0000 | 0.0000  | 0.0000 |
|      |           |           |    | 0.0000                   | 0.0000  | 0.0000 | 0.0000  | 0.0000 |
| 176. | (1.99904) | CR ( 1) C | 18 | s(100.00%)p 0.00( 0.00%) |         |        |         |        |
|      |           |           |    | 1.0000                   | 0.0003  | 0.0000 | 0.0000  | 0.0000 |
|      |           |           |    | -0.0002                  | 0.0000  | 0.0000 | 0.0000  | 0.0000 |

|      |           |              |            |                |        |         |        |        |
|------|-----------|--------------|------------|----------------|--------|---------|--------|--------|
|      |           |              | 0.0000     | -0.0001        | 0.0000 | 0.0000  | 0.0000 | 0.0000 |
|      |           |              | 0.0000     | 0.0000         | 0.0000 | 0.0000  | 0.0000 |        |
| 177. | (1.99904) | CR ( 1) C 19 | s(100.00%) | p 0.00( 0.00%) |        |         |        |        |
|      |           |              | 1.0000     | 0.0003         | 0.0000 | 0.0000  | 0.0000 |        |
|      |           |              | 0.0000     | 0.0000         | 0.0000 | -0.0001 | 0.0000 |        |
|      |           |              | 0.0000     | 0.0002         | 0.0000 | 0.0000  | 0.0000 |        |
|      |           |              | 0.0000     | 0.0000         | 0.0000 | 0.0000  | 0.0000 |        |
| 178. | (1.99942) | CR ( 1) N 20 | s(100.00%) |                |        |         |        |        |
|      |           |              | 1.0000     | 0.0002         | 0.0000 | 0.0000  | 0.0000 |        |
|      |           |              | 0.0000     | 0.0000         | 0.0000 | 0.0000  | 0.0000 |        |
|      |           |              | 0.0000     | 0.0000         | 0.0000 | 0.0000  | 0.0000 |        |
|      |           |              | 0.0000     | 0.0000         | 0.0000 | 0.0000  | 0.0000 |        |
| 179. | (1.99873) | CR ( 1) C 21 | s(100.00%) | p 0.00( 0.00%) |        |         |        |        |
|      |           |              | 1.0000     | 0.0004         | 0.0000 | 0.0000  | 0.0000 |        |
|      |           |              | -0.0001    | 0.0000         | 0.0000 | -0.0001 | 0.0000 |        |
|      |           |              | 0.0000     | 0.0000         | 0.0000 | 0.0000  | 0.0000 |        |
|      |           |              | 0.0000     | 0.0000         | 0.0000 | 0.0000  | 0.0000 |        |
| 180. | (1.99897) | CR ( 1) C 22 | s(100.00%) | p 0.00( 0.00%) |        |         |        |        |
|      |           |              | 1.0000     | 0.0002         | 0.0000 | 0.0000  | 0.0000 |        |
|      |           |              | -0.0002    | 0.0000         | 0.0000 | -0.0001 | 0.0000 |        |
|      |           |              | 0.0000     | -0.0001        | 0.0000 | 0.0000  | 0.0000 |        |
|      |           |              | 0.0000     | 0.0000         | 0.0000 | 0.0000  | 0.0000 |        |
| 181. | (1.99910) | CR ( 1) C 23 | s(100.00%) | p 0.00( 0.00%) |        |         |        |        |
|      |           |              | 1.0000     | 0.0002         | 0.0000 | 0.0000  | 0.0000 |        |
|      |           |              | -0.0001    | 0.0000         | 0.0000 | 0.0000  | 0.0000 |        |
|      |           |              | 0.0000     | -0.0004        | 0.0000 | 0.0000  | 0.0000 |        |
|      |           |              | 0.0000     | 0.0000         | 0.0000 | 0.0000  | 0.0000 |        |
| 182. | (1.99920) | CR ( 1) C 24 | s(100.00%) | p 0.00( 0.00%) |        |         |        |        |
|      |           |              | 1.0000     | 0.0002         | 0.0000 | 0.0000  | 0.0000 |        |
|      |           |              | -0.0002    | 0.0000         | 0.0000 | 0.0002  | 0.0000 |        |
|      |           |              | 0.0000     | -0.0003        | 0.0000 | 0.0000  | 0.0000 |        |
|      |           |              | 0.0000     | 0.0000         | 0.0000 | 0.0000  | 0.0000 |        |
| 183. | (1.99909) | CR ( 1) C 25 | s(100.00%) | p 0.00( 0.00%) |        |         |        |        |
|      |           |              | 1.0000     | 0.0001         | 0.0000 | 0.0000  | 0.0000 |        |
|      |           |              | -0.0002    | 0.0000         | 0.0000 | 0.0003  | 0.0000 |        |
|      |           |              | 0.0000     | 0.0000         | 0.0000 | 0.0000  | 0.0000 |        |
|      |           |              | 0.0000     | 0.0000         | 0.0000 | 0.0000  | 0.0000 |        |
| 184. | (1.99898) | CR ( 1) C 26 | s(100.00%) |                |        |         |        |        |
|      |           |              | 1.0000     | 0.0002         | 0.0000 | 0.0000  | 0.0000 |        |
|      |           |              | 0.0000     | 0.0000         | 0.0000 | 0.0001  | 0.0000 |        |
|      |           |              | 0.0000     | 0.0000         | 0.0000 | 0.0000  | 0.0000 |        |
|      |           |              | 0.0000     | 0.0000         | 0.0000 | 0.0000  | 0.0000 |        |
| 185. | (1.99936) | CR ( 1) C 27 | s(100.00%) | p 0.00( 0.00%) |        |         |        |        |
|      |           |              | 1.0000     | 0.0001         | 0.0000 | 0.0000  | 0.0000 |        |
|      |           |              | 0.0001     | 0.0000         | 0.0000 | -0.0002 | 0.0000 |        |
|      |           |              | 0.0000     | 0.0000         | 0.0000 | 0.0000  | 0.0000 |        |
|      |           |              | 0.0000     | 0.0000         | 0.0000 | 0.0000  | 0.0000 |        |
| 186. | (1.99941) | CR ( 1) C 28 | s(100.00%) | p 0.00( 0.00%) |        |         |        |        |
|      |           |              | 1.0000     | -0.0001        | 0.0000 | 0.0000  | 0.0000 |        |
|      |           |              | -0.0002    | 0.0000         | 0.0000 | -0.0003 | 0.0000 |        |
|      |           |              | 0.0000     | 0.0000         | 0.0000 | 0.0000  | 0.0000 |        |
|      |           |              | 0.0000     | 0.0000         | 0.0000 | 0.0000  | 0.0000 |        |
| 187. | (1.99937) | CR ( 1) C 29 | s(100.00%) | p 0.00( 0.00%) |        |         |        |        |
|      |           |              | 1.0000     | 0.0001         | 0.0000 | 0.0000  | 0.0000 |        |
|      |           |              | 0.0000     | 0.0000         | 0.0000 | 0.0000  | 0.0000 |        |
|      |           |              | 0.0000     | 0.0002         | 0.0000 | 0.0000  | 0.0000 |        |
|      |           |              | 0.0000     | 0.0000         | 0.0000 | 0.0000  | 0.0000 |        |
| 188. | (1.99942) | CR ( 1) C 30 | s(100.00%) | p 0.00( 0.00%) |        |         |        |        |
|      |           |              | 1.0000     | 0.0000         | 0.0000 | 0.0000  | 0.0000 |        |
|      |           |              | -0.0003    | 0.0000         | 0.0000 | 0.0000  | 0.0000 |        |
|      |           |              | 0.0000     | 0.0002         | 0.0000 | 0.0000  | 0.0000 |        |
|      |           |              | 0.0000     | 0.0000         | 0.0000 | 0.0000  | 0.0000 |        |
| 189. | (1.99874) | CR ( 1) C 31 | s(100.00%) | p 0.00( 0.00%) |        |         |        |        |
|      |           |              | 1.0000     | 0.0004         | 0.0000 | 0.0000  | 0.0000 |        |
|      |           |              | -0.0001    | 0.0000         | 0.0000 | -0.0001 | 0.0000 |        |
|      |           |              | 0.0000     | 0.0001         | 0.0000 | 0.0000  | 0.0000 |        |
|      |           |              | 0.0000     | 0.0000         | 0.0000 | 0.0000  | 0.0000 |        |
| 190. | (1.99898) | CR ( 1) C 32 | s(100.00%) | p 0.00( 0.00%) |        |         |        |        |
|      |           |              | 1.0000     | 0.0002         | 0.0000 | 0.0000  | 0.0000 |        |
|      |           |              | 0.0000     | 0.0000         | 0.0000 | 0.0000  | 0.0000 |        |
|      |           |              | 0.0000     | 0.0001         | 0.0000 | 0.0000  | 0.0000 |        |

|      |           |    |      |   |    |            |         |         |         |         |
|------|-----------|----|------|---|----|------------|---------|---------|---------|---------|
| 191. | (1.99910) | CR | ( 1) | C | 33 | 0.0000     | 0.0000  | 0.0000  | 0.0000  |         |
|      |           |    |      |   |    | s(100.00%) | p 0.00( | 0.00%)  |         |         |
|      |           |    |      |   |    | 1.0000     | 0.0002  | 0.0000  | 0.0000  | 0.0000  |
|      |           |    |      |   |    | 0.0001     | 0.0000  | 0.0000  | 0.0001  | 0.0000  |
|      |           |    |      |   |    | 0.0000     | 0.0004  | 0.0000  | 0.0000  | 0.0000  |
|      |           |    |      |   |    | 0.0000     | 0.0000  | 0.0000  | 0.0000  | 0.0000  |
| 192. | (1.99920) | CR | ( 1) | C | 34 | s(100.00%) | p 0.00( | 0.00%)  |         |         |
|      |           |    |      |   |    | 1.0000     | 0.0002  | 0.0000  | 0.0000  | 0.0000  |
|      |           |    |      |   |    | 0.0003     | 0.0000  | 0.0000  | -0.0001 | 0.0000  |
|      |           |    |      |   |    | 0.0000     | 0.0002  | 0.0000  | 0.0000  | 0.0000  |
|      |           |    |      |   |    | 0.0000     | 0.0000  | 0.0000  | 0.0000  | 0.0000  |
| 193. | (1.99910) | CR | ( 1) | C | 35 | s(100.00%) | p 0.00( | 0.00%)  |         |         |
|      |           |    |      |   |    | 1.0000     | 0.0002  | 0.0000  | 0.0000  | 0.0000  |
|      |           |    |      |   |    | 0.0003     | 0.0000  | 0.0000  | -0.0002 | 0.0000  |
|      |           |    |      |   |    | 0.0000     | 0.0000  | 0.0000  | 0.0000  | 0.0000  |
|      |           |    |      |   |    | 0.0000     | 0.0000  | 0.0000  | 0.0000  | 0.0000  |
| 194. | (1.99898) | CR | ( 1) | C | 36 | s(100.00%) |         |         |         |         |
|      |           |    |      |   |    | 1.0000     | 0.0002  | 0.0000  | 0.0000  | 0.0000  |
|      |           |    |      |   |    | 0.0001     | 0.0000  | 0.0000  | 0.0000  | 0.0000  |
|      |           |    |      |   |    | 0.0000     | 0.0000  | 0.0000  | 0.0000  | 0.0000  |
|      |           |    |      |   |    | 0.0000     | 0.0000  | 0.0000  | 0.0000  | 0.0000  |
| 195. | (1.99937) | CR | ( 1) | C | 37 | s(100.00%) | p 0.00( | 0.00%)  |         |         |
|      |           |    |      |   |    | 1.0000     | 0.0001  | 0.0000  | 0.0000  | 0.0000  |
|      |           |    |      |   |    | -0.0002    | 0.0000  | 0.0000  | 0.0001  | 0.0000  |
|      |           |    |      |   |    | 0.0000     | 0.0000  | 0.0000  | 0.0000  | 0.0000  |
|      |           |    |      |   |    | 0.0000     | 0.0000  | 0.0000  | 0.0000  | 0.0000  |
| 196. | (1.99942) | CR | ( 1) | C | 38 | s(100.00%) | p 0.00( | 0.00%)  |         |         |
|      |           |    |      |   |    | 1.0000     | 0.0000  | 0.0000  | 0.0000  | 0.0000  |
|      |           |    |      |   |    | -0.0002    | 0.0000  | 0.0000  | 0.0000  | 0.0000  |
|      |           |    |      |   |    | 0.0000     | 0.0003  | 0.0000  | 0.0000  | 0.0000  |
|      |           |    |      |   |    | 0.0000     | 0.0000  | 0.0000  | 0.0000  | 0.0000  |
| 197. | (1.99936) | CR | ( 1) | C | 39 | s(100.00%) | p 0.00( | 0.00%)  |         |         |
|      |           |    |      |   |    | 1.0000     | 0.0001  | 0.0000  | 0.0000  | 0.0000  |
|      |           |    |      |   |    | -0.0001    | 0.0000  | 0.0000  | -0.0001 | 0.0000  |
|      |           |    |      |   |    | 0.0000     | -0.0002 | 0.0000  | 0.0000  | 0.0000  |
|      |           |    |      |   |    | 0.0000     | 0.0000  | 0.0000  | 0.0000  | 0.0000  |
| 198. | (1.99942) | CR | ( 1) | C | 40 | s(100.00%) | p 0.00( | 0.00%)  |         |         |
|      |           |    |      |   |    | 1.0000     | -0.0001 | 0.0000  | 0.0000  | 0.0000  |
|      |           |    |      |   |    | -0.0001    | 0.0000  | 0.0000  | -0.0004 | 0.0000  |
|      |           |    |      |   |    | 0.0000     | 0.0000  | 0.0000  | 0.0000  | 0.0000  |
|      |           |    |      |   |    | 0.0000     | 0.0000  | 0.0000  | 0.0000  | 0.0000  |
| 199. | (1.99874) | CR | ( 1) | C | 41 | s(100.00%) | p 0.00( | 0.00%)  | d 0.00( | 0.00%)  |
|      |           |    |      |   |    | 1.0000     | 0.0003  | -0.0001 | 0.0000  | 0.0000  |
|      |           |    |      |   |    | 0.0001     | -0.0001 | 0.0001  | 0.0002  | 0.0000  |
|      |           |    |      |   |    | 0.0000     | -0.0003 | -0.0003 | 0.0001  | -0.0002 |
|      |           |    |      |   |    | 0.0001     | -0.0004 | 0.0000  | -0.0001 |         |
| 200. | (1.99899) | CR | ( 1) | C | 42 | s(100.00%) | p 0.00( | 0.00%)  |         |         |
|      |           |    |      |   |    | 1.0000     | 0.0002  | 0.0000  | 0.0000  | 0.0000  |
|      |           |    |      |   |    | 0.0001     | 0.0000  | 0.0000  | 0.0000  | 0.0000  |
|      |           |    |      |   |    | 0.0000     | -0.0002 | 0.0000  | 0.0000  | 0.0000  |
|      |           |    |      |   |    | 0.0000     | 0.0000  | 0.0000  | 0.0000  | 0.0000  |
| 201. | (1.99911) | CR | ( 1) | C | 43 | s(100.00%) | p 0.00( | 0.00%)  |         |         |
|      |           |    |      |   |    | 1.0000     | 0.0002  | 0.0000  | 0.0000  | 0.0000  |
|      |           |    |      |   |    | 0.0000     | 0.0000  | 0.0000  | -0.0002 | 0.0000  |
|      |           |    |      |   |    | 0.0000     | -0.0003 | 0.0000  | 0.0000  | 0.0000  |
|      |           |    |      |   |    | 0.0000     | 0.0000  | 0.0000  | 0.0000  | 0.0000  |
| 202. | (1.99920) | CR | ( 1) | C | 44 | s(100.00%) | p 0.00( | 0.00%)  |         |         |
|      |           |    |      |   |    | 1.0000     | 0.0002  | 0.0000  | 0.0000  | 0.0000  |
|      |           |    |      |   |    | 0.0002     | 0.0000  | 0.0000  | -0.0003 | 0.0000  |
|      |           |    |      |   |    | 0.0000     | -0.0001 | 0.0000  | 0.0000  | 0.0000  |
|      |           |    |      |   |    | 0.0000     | 0.0000  | 0.0000  | 0.0000  | 0.0000  |
| 203. | (1.99909) | CR | ( 1) | C | 45 | s(100.00%) | p 0.00( | 0.00%)  |         |         |
|      |           |    |      |   |    | 1.0000     | 0.0002  | 0.0000  | 0.0000  | 0.0000  |
|      |           |    |      |   |    | 0.0003     | 0.0000  | 0.0000  | -0.0002 | 0.0000  |
|      |           |    |      |   |    | 0.0000     | 0.0002  | 0.0000  | 0.0000  | 0.0000  |
|      |           |    |      |   |    | 0.0000     | 0.0000  | 0.0000  | 0.0000  | 0.0000  |
| 204. | (1.99898) | CR | ( 1) | C | 46 | s(100.00%) |         |         |         |         |
|      |           |    |      |   |    | 1.0000     | 0.0002  | 0.0000  | 0.0000  | 0.0000  |
|      |           |    |      |   |    | 0.0000     | 0.0000  | 0.0000  | -0.0001 | 0.0000  |
|      |           |    |      |   |    | 0.0000     | 0.0000  | 0.0000  | 0.0000  | 0.0000  |
|      |           |    |      |   |    | 0.0000     | 0.0000  | 0.0000  | 0.0000  | 0.0000  |



|      |           |    |      |   |    |                          |         |        |         |        |
|------|-----------|----|------|---|----|--------------------------|---------|--------|---------|--------|
| 205. | (1.99935) | CR | ( 1) | C | 47 | s(100.00%)p 0.00( 0.00%) |         |        |         |        |
|      |           |    |      |   |    | 1.0000                   | 0.0001  | 0.0000 | 0.0000  | 0.0000 |
|      |           |    |      |   |    | -0.0001                  | 0.0000  | 0.0000 | 0.0000  | 0.0002 |
|      |           |    |      |   |    | 0.0000                   | -0.0001 | 0.0000 | 0.0000  | 0.0000 |
|      |           |    |      |   |    | 0.0000                   | 0.0000  | 0.0000 | 0.0000  | 0.0000 |
| 206. | (1.99941) | CR | ( 1) | C | 48 | s(100.00%)p 0.00( 0.00%) |         |        |         |        |
|      |           |    |      |   |    | 1.0000                   | -0.0001 | 0.0000 | 0.0000  | 0.0000 |
|      |           |    |      |   |    | 0.0002                   | 0.0000  | 0.0000 | 0.0002  | 0.0000 |
|      |           |    |      |   |    | 0.0000                   | -0.0003 | 0.0000 | 0.0000  | 0.0000 |
|      |           |    |      |   |    | 0.0000                   | 0.0000  | 0.0000 | 0.0000  | 0.0000 |
| 207. | (1.99936) | CR | ( 1) | C | 49 | s(100.00%)p 0.00( 0.00%) |         |        |         |        |
|      |           |    |      |   |    | 1.0000                   | 0.0001  | 0.0000 | 0.0000  | 0.0000 |
|      |           |    |      |   |    | 0.0000                   | 0.0000  | 0.0000 | 0.0002  | 0.0000 |
|      |           |    |      |   |    | 0.0000                   | 0.0002  | 0.0000 | 0.0000  | 0.0000 |
|      |           |    |      |   |    | 0.0000                   | 0.0000  | 0.0000 | 0.0000  | 0.0000 |
| 208. | (1.99942) | CR | ( 1) | C | 50 | s(100.00%)p 0.00( 0.00%) |         |        |         |        |
|      |           |    |      |   |    | 1.0000                   | 0.0000  | 0.0000 | 0.0000  | 0.0000 |
|      |           |    |      |   |    | 0.0003                   | 0.0000  | 0.0000 | 0.0001  | 0.0000 |
|      |           |    |      |   |    | 0.0000                   | 0.0001  | 0.0000 | 0.0000  | 0.0000 |
|      |           |    |      |   |    | 0.0000                   | 0.0000  | 0.0000 | 0.0000  | 0.0000 |
| 209. | (1.99937) | CR | ( 1) | C | 51 | s(100.00%)p 0.00( 0.00%) |         |        |         |        |
|      |           |    |      |   |    | 1.0000                   | 0.0001  | 0.0000 | 0.0000  | 0.0000 |
|      |           |    |      |   |    | 0.0002                   | 0.0000  | 0.0000 | -0.0001 | 0.0000 |
|      |           |    |      |   |    | 0.0000                   | 0.0000  | 0.0000 | 0.0000  | 0.0000 |
|      |           |    |      |   |    | 0.0000                   | 0.0000  | 0.0000 | 0.0000  | 0.0000 |
| 210. | (1.99942) | CR | ( 1) | C | 52 | s(100.00%)p 0.00( 0.00%) |         |        |         |        |
|      |           |    |      |   |    | 1.0000                   | 0.0000  | 0.0000 | 0.0000  | 0.0000 |
|      |           |    |      |   |    | 0.0003                   | 0.0000  | 0.0000 | 0.0002  | 0.0000 |
|      |           |    |      |   |    | 0.0000                   | 0.0001  | 0.0000 | 0.0000  | 0.0000 |
|      |           |    |      |   |    | 0.0000                   | 0.0000  | 0.0000 | 0.0000  | 0.0000 |
| 211. | (1.99935) | CR | ( 1) | C | 53 | s(100.00%)p 0.00( 0.00%) |         |        |         |        |
|      |           |    |      |   |    | 1.0000                   | 0.0001  | 0.0000 | 0.0000  | 0.0000 |
|      |           |    |      |   |    | 0.0000                   | 0.0000  | 0.0000 | -0.0001 | 0.0000 |
|      |           |    |      |   |    | 0.0000                   | -0.0002 | 0.0000 | 0.0000  | 0.0000 |
|      |           |    |      |   |    | 0.0000                   | 0.0000  | 0.0000 | 0.0000  | 0.0000 |
| 212. | (1.99941) | CR | ( 1) | C | 54 | s(100.00%)p 0.00( 0.00%) |         |        |         |        |
|      |           |    |      |   |    | 1.0000                   | -0.0001 | 0.0000 | 0.0000  | 0.0000 |
|      |           |    |      |   |    | 0.0002                   | 0.0000  | 0.0000 | 0.0003  | 0.0000 |
|      |           |    |      |   |    | 0.0000                   | -0.0003 | 0.0000 | 0.0000  | 0.0000 |
|      |           |    |      |   |    | 0.0000                   | 0.0000  | 0.0000 | 0.0000  | 0.0000 |
| 213. | (1.99941) | CR | ( 1) | C | 55 | s(100.00%)p 0.00( 0.00%) |         |        |         |        |
|      |           |    |      |   |    | 1.0000                   | -0.0001 | 0.0000 | 0.0000  | 0.0000 |
|      |           |    |      |   |    | 0.0001                   | 0.0000  | 0.0000 | 0.0004  | 0.0000 |
|      |           |    |      |   |    | 0.0000                   | 0.0000  | 0.0000 | 0.0000  | 0.0000 |
|      |           |    |      |   |    | 0.0000                   | 0.0000  | 0.0000 | 0.0000  | 0.0000 |
| 214. | (1.99942) | CR | ( 1) | C | 56 | s(100.00%)p 0.00( 0.00%) |         |        |         |        |
|      |           |    |      |   |    | 1.0000                   | -0.0001 | 0.0000 | 0.0000  | 0.0000 |
|      |           |    |      |   |    | 0.0002                   | 0.0000  | 0.0000 | 0.0000  | 0.0000 |
|      |           |    |      |   |    | 0.0000                   | -0.0003 | 0.0000 | 0.0000  | 0.0000 |
|      |           |    |      |   |    | 0.0000                   | 0.0000  | 0.0000 | 0.0000  | 0.0000 |
| 215. | (1.99943) | CR | ( 1) | C | 57 | s(100.00%)p 0.00( 0.00%) |         |        |         |        |
|      |           |    |      |   |    | 1.0000                   | 0.0000  | 0.0000 | 0.0000  | 0.0000 |
|      |           |    |      |   |    | -0.0002                  | 0.0000  | 0.0000 | -0.0001 | 0.0000 |
|      |           |    |      |   |    | 0.0000                   | -0.0001 | 0.0000 | 0.0000  | 0.0000 |
|      |           |    |      |   |    | 0.0000                   | 0.0000  | 0.0000 | 0.0000  | 0.0000 |
| 216. | (1.99942) | CR | ( 1) | C | 58 | s(100.00%)p 0.00( 0.00%) |         |        |         |        |
|      |           |    |      |   |    | 1.0000                   | -0.0001 | 0.0000 | 0.0000  | 0.0000 |
|      |           |    |      |   |    | -0.0001                  | 0.0000  | 0.0000 | -0.0001 | 0.0000 |
|      |           |    |      |   |    | 0.0000                   | 0.0003  | 0.0000 | 0.0000  | 0.0000 |
|      |           |    |      |   |    | 0.0000                   | 0.0000  | 0.0000 | 0.0000  | 0.0000 |
| 217. | (1.99941) | CR | ( 1) | C | 59 | s(100.00%)p 0.00( 0.00%) |         |        |         |        |
|      |           |    |      |   |    | 1.0000                   | -0.0001 | 0.0000 | 0.0000  | 0.0000 |
|      |           |    |      |   |    | 0.0000                   | 0.0000  | 0.0000 | -0.0002 | 0.0000 |
|      |           |    |      |   |    | 0.0000                   | 0.0002  | 0.0000 | 0.0000  | 0.0000 |
|      |           |    |      |   |    | 0.0000                   | 0.0000  | 0.0000 | 0.0000  | 0.0000 |
| 218. | (1.99943) | CR | ( 1) | C | 60 | s(100.00%)p 0.00( 0.00%) |         |        |         |        |
|      |           |    |      |   |    | 1.0000                   | 0.0000  | 0.0000 | 0.0000  | 0.0000 |
|      |           |    |      |   |    | -0.0003                  | 0.0000  | 0.0000 | -0.0001 | 0.0000 |
|      |           |    |      |   |    | 0.0000                   | -0.0001 | 0.0000 | 0.0000  | 0.0000 |
|      |           |    |      |   |    | 0.0000                   | 0.0000  | 0.0000 | 0.0000  | 0.0000 |
| 219. | (1.99942) | CR | ( 1) | C | 61 | s(100.00%)p 0.00( 0.00%) |         |        |         |        |

|      |           |           |    |            |                 |                 |         |         |        |
|------|-----------|-----------|----|------------|-----------------|-----------------|---------|---------|--------|
|      |           |           |    | 1.0000     | -0.0001         | 0.0000          | 0.0000  | 0.0000  | 0.0000 |
|      |           |           |    | 0.0002     | 0.0000          | 0.0000          | 0.0000  | 0.0003  | 0.0000 |
|      |           |           |    | 0.0000     | 0.0001          | 0.0000          | 0.0000  | 0.0000  | 0.0000 |
|      |           |           |    | 0.0000     | 0.0000          | 0.0000          | 0.0000  | 0.0000  | 0.0000 |
| 220. | (1.99942) | CR ( 1) C | 62 | s(100.00%) | p 0.00( 0.00%)  |                 |         |         |        |
|      |           |           |    | 1.0000     | 0.0000          | 0.0000          | 0.0000  | 0.0000  | 0.0000 |
|      |           |           |    | 0.0002     | 0.0000          | 0.0000          | 0.0000  | 0.0000  | 0.0000 |
|      |           |           |    | 0.0000     | -0.0002         | 0.0000          | 0.0000  | 0.0000  | 0.0000 |
|      |           |           |    | 0.0000     | 0.0000          | 0.0000          | 0.0000  | 0.0000  | 0.0000 |
| 221. | (1.96474) | LP ( 1) O | 2  | s( 59.74%) | p 0.67( 40.24%) | d 0.00( 0.02%)  |         |         |        |
|      |           |           |    | -0.0003    | 0.7729          | 0.0095          | -0.0003 | -0.0002 |        |
|      |           |           |    | -0.0745    | 0.0003          | -0.0013         | 0.1686  | 0.0008  |        |
|      |           |           |    | 0.0015     | -0.6070         | -0.0059         | -0.0055 | 0.0006  |        |
|      |           |           |    | -0.0035    | 0.0063          | -0.0004         | -0.0117 |         |        |
| 222. | (1.74913) | LP ( 2) O | 2  | s( 0.28%)  | p99.99( 99.65%) | d 0.22( 0.06%)  |         |         |        |
|      |           |           |    | 0.0001     | 0.0533          | -0.0014         | -0.0009 | -0.0001 |        |
|      |           |           |    | -0.9537    | -0.0129         | 0.0018          | -0.2737 | -0.0047 |        |
|      |           |           |    | 0.0008     | 0.1088          | 0.0000          | -0.0012 | 0.0046  |        |
|      |           |           |    | -0.0220    | -0.0068         | -0.0068         | 0.0056  |         |        |
| 223. | (0.58308) | LP*( 1) B | 14 | s( 0.06%)  | p99.99( 99.79%) | d 2.25( 0.14%)  |         |         |        |
|      |           |           |    | 0.0000     | 0.0252          | 0.0004          | -0.0006 | -0.0017 |        |
|      |           |           |    | -0.4664    | 0.0010          | 0.0107          | 0.8415  | 0.0036  |        |
|      |           |           |    | -0.0234    | 0.2674          | 0.0014          | -0.0105 | -0.0246 |        |
|      |           |           |    | 0.0004     | -0.0201         | 0.0155          | -0.0136 |         |        |
| 224. | (0.74839) | LP ( 1) B | 15 | s( 0.01%)  | p 1.00( 99.92%) | d 0.00( 0.07%)  |         |         |        |
|      |           |           |    | 0.0000     | 0.0097          | 0.0020          | -0.0007 | -0.0006 |        |
|      |           |           |    | -0.3649    | -0.0035         | 0.0097          | 0.8632  | 0.0133  |        |
|      |           |           |    | -0.0213    | 0.3465          | 0.0082          | -0.0072 | 0.0042  |        |
|      |           |           |    | 0.0111     | -0.0176         | -0.0138         | -0.0102 |         |        |
| 225. | (1.53944) | LP ( 1) N | 20 | s( 0.01%)  | p 1.00( 99.98%) | d 0.00( 0.01%)  |         |         |        |
|      |           |           |    | 0.0000     | 0.0081          | -0.0020         | 0.0011  | 0.0000  |        |
|      |           |           |    | 0.2547     | 0.0046          | 0.0023          | -0.7226 | -0.0075 |        |
|      |           |           |    | -0.0074    | -0.6423         | -0.0096         | -0.0065 | 0.0066  |        |
|      |           |           |    | 0.0037     | 0.0016          | -0.0004         | 0.0058  |         |        |
| 226. | (0.01705) | RY*( 1) C | 1  | s( 24.47%) | p 3.06( 74.95%) | d 0.02( 0.58%)  |         |         |        |
|      |           |           |    | 0.0000     | -0.0522         | 0.4916          | -0.0158 | -0.0065 |        |
|      |           |           |    | 0.0060     | 0.1757          | 0.0274          | -0.0208 | -0.2056 |        |
|      |           |           |    | -0.0149    | 0.0707          | 0.8172          | 0.0468  | -0.0296 |        |
|      |           |           |    | 0.0622     | 0.0202          | 0.0020          | 0.0255  |         |        |
| 227. | (0.00521) | RY*( 2) C | 1  | s( 0.18%)  | p28.27( 4.96%)  | d99.99( 94.87%) |         |         |        |
|      |           |           |    | 0.0000     | 0.0004          | 0.0244          | 0.0339  | 0.0030  |        |
|      |           |           |    | -0.0123    | -0.0740         | 0.0539          | 0.0465  | 0.0357  |        |
|      |           |           |    | -0.1744    | 0.0168          | 0.0036          | -0.0829 | 0.2744  |        |
|      |           |           |    | -0.2261    | 0.7617          | 0.1212          | 0.4769  |         |        |
| 228. | (0.00290) | RY*( 3) C | 1  | s( 14.31%) | p 0.58( 8.25%)  | d 5.41( 77.44%) |         |         |        |
|      |           |           |    | 0.0000     | -0.0044         | -0.2414         | 0.2911  | -0.0048 |        |
|      |           |           |    | 0.0121     | 0.1941          | -0.0036         | 0.0043  | 0.0039  |        |
|      |           |           |    | -0.0738    | -0.0156         | 0.1809          | 0.0790  | 0.2034  |        |
|      |           |           |    | -0.7947    | -0.2581         | -0.1849         | -0.0269 |         |        |
| 229. | (0.00155) | RY*( 4) C | 1  | s( 40.18%) | p 0.45( 17.95%) | d 1.04( 41.87%) |         |         |        |
|      |           |           |    | 0.0000     | -0.0039         | 0.5562          | -0.3042 | -0.0026 |        |
|      |           |           |    | 0.0139     | 0.1285          | -0.0175         | -0.0110 | 0.2132  |        |
|      |           |           |    | 0.0587     | 0.0451          | -0.3028         | -0.1406 | -0.1299 |        |
|      |           |           |    | -0.2382    | -0.2678         | -0.2596         | 0.4538  |         |        |
| 230. | (0.00086) | RY*( 5) C | 1  | s( 3.61%)  | p25.78( 92.98%) | d 0.95( 3.41%)  |         |         |        |
|      |           |           |    | 0.0000     | 0.0013          | 0.1663          | 0.0915  | 0.0057  |        |
|      |           |           |    | 0.0120     | -0.6197         | -0.5299         | 0.0009  | -0.4213 |        |
|      |           |           |    | -0.2774    | 0.0060          | -0.0558         | 0.0853  | -0.0121 |        |
|      |           |           |    | -0.0935    | -0.1150         | -0.0895         | 0.0630  |         |        |
| 231. | (0.00055) | RY*( 6) C | 1  | s( 0.63%)  | p99.99( 99.28%) | d 0.15( 0.09%)  |         |         |        |
|      |           |           |    | 0.0000     | -0.0008         | -0.0046         | 0.0787  | -0.0061 |        |
|      |           |           |    | -0.0037    | -0.4514         | -0.2028         | 0.0057  | 0.7697  |        |
|      |           |           |    | 0.2333     | 0.0003          | 0.3017          | 0.0999  | 0.0168  |        |
|      |           |           |    | -0.0052    | -0.0115         | -0.0224         | 0.0015  |         |        |
| 232. | (0.00041) | RY*( 7) C | 1  | s( 86.66%) | p 0.13( 11.33%) | d 0.02( 2.01%)  |         |         |        |
|      |           |           |    | 0.0000     | 0.0081          | 0.4245          | 0.8282  | -0.0185 |        |
|      |           |           |    | 0.0094     | 0.0147          | 0.1286          | -0.0054 | 0.0140  |        |
|      |           |           |    | 0.1769     | 0.0308          | -0.2433         | -0.0697 | -0.0257 |        |
|      |           |           |    | 0.0685     | 0.0634          | 0.0261          | -0.1003 |         |        |
| 233. | (0.00029) | RY*( 8) C | 1  | s( 1.71%)  | p55.64( 95.10%) | d 1.87( 3.19%)  |         |         |        |
|      |           |           |    | 0.0000     | 0.0131          | 0.1033          | 0.0778  | -0.0140 |        |

|      |           |         |   |   |            |                 |                 |         |         |
|------|-----------|---------|---|---|------------|-----------------|-----------------|---------|---------|
|      |           |         |   |   | -0.0017    | 0.4479          | -0.4123         | -0.0008 | 0.2714  |
|      |           |         |   |   | -0.4617    | -0.0001         | -0.1239         | 0.5274  | -0.0265 |
|      |           |         |   |   | 0.1305     | 0.0795          | 0.0672          | -0.0579 |         |
| 234. | (0.00015) | RY*( 9) | C | 1 | s( 1.70%)  | p57.16( 97.19%) | d 0.65( 1.10%)  |         |         |
|      |           |         |   |   | 0.0000     | 0.0272          | 0.1082          | -0.0675 | 0.0001  |
|      |           |         |   |   | 0.0053     | -0.3178         | 0.6403          | 0.0011  | -0.0284 |
|      |           |         |   |   | -0.1467    | -0.0026         | -0.0620         | 0.6594  | -0.0434 |
|      |           |         |   |   | -0.0583    | -0.0528         | -0.0428         | 0.0337  |         |
| 235. | (0.00010) | RY*(10) | C | 1 | s( 24.73%) | p 0.27( 6.72%)  | d 2.77( 68.55%) |         |         |
|      |           |         |   |   | 0.0000     | 0.0175          | 0.3773          | -0.3233 | -0.0065 |
|      |           |         |   |   | -0.0014    | -0.0414         | -0.0682         | -0.0036 | 0.0038  |
|      |           |         |   |   | 0.1748     | 0.0152          | -0.1700         | 0.0338  | 0.3822  |
|      |           |         |   |   | -0.2920    | 0.1464          | 0.2900          | -0.5904 |         |
| 236. | (0.00008) | RY*(11) | C | 1 | s( 0.96%)  | p94.46( 90.88%) | d 8.48( 8.16%)  |         |         |
| 237. | (0.00002) | RY*(12) | C | 1 | s( 2.00%)  | p 0.26( 0.52%)  | d48.71( 97.48%) |         |         |
| 238. | (0.00002) | RY*(13) | C | 1 | s( 2.25%)  | p 0.25( 0.57%)  | d43.20( 97.18%) |         |         |
| 239. | (0.00000) | RY*(14) | C | 1 | s( 96.26%) | p 0.00( 0.05%)  | d 0.04( 3.69%)  |         |         |
| 240. | (0.00533) | RY*( 1) | O | 2 | s( 1.14%)  | p83.64( 95.57%) | d 2.88( 3.29%)  |         |         |
|      |           |         |   |   | 0.0000     | 0.0001          | 0.1065          | -0.0087 | 0.0017  |
|      |           |         |   |   | -0.0083    | 0.9109          | -0.0039         | -0.0023 | 0.3387  |
|      |           |         |   |   | 0.0036     | 0.0039          | -0.1030         | -0.0210 | 0.0205  |
|      |           |         |   |   | -0.1566    | -0.0663         | -0.0528         | 0.0278  |         |
| 241. | (0.00361) | RY*( 2) | O | 2 | s( 0.47%)  | p99.99( 97.97%) | d 3.36( 1.56%)  |         |         |
|      |           |         |   |   | 0.0000     | -0.0006         | 0.0682          | -0.0008 | 0.0001  |
|      |           |         |   |   | -0.0044    | -0.3160         | 0.0025          | 0.0153  | 0.9007  |
|      |           |         |   |   | 0.0007     | 0.0037          | 0.2615          | -0.0082 | -0.0312 |
|      |           |         |   |   | 0.0207     | -0.1009         | -0.0214         | -0.0599 |         |
| 242. | (0.00179) | RY*( 3) | O | 2 | s( 86.63%) | p 0.15( 13.34%) | d 0.00( 0.02%)  |         |         |
|      |           |         |   |   | 0.0000     | -0.0035         | 0.9306          | 0.0162  | 0.0089  |
|      |           |         |   |   | 0.0030     | -0.1331         | -0.0385         | -0.0025 | -0.0351 |
|      |           |         |   |   | 0.0424     | 0.0135          | -0.2843         | -0.1738 | 0.0101  |
|      |           |         |   |   | -0.0078    | 0.0021          | 0.0082          | 0.0005  |         |
| 243. | (0.00041) | RY*( 4) | O | 2 | s( 7.88%)  | p11.53( 90.77%) | d 0.17( 1.35%)  |         |         |
|      |           |         |   |   | 0.0000     | 0.0262          | 0.2692          | -0.0733 | -0.0155 |
|      |           |         |   |   | 0.0060     | 0.1504          | -0.0264         | -0.0065 | -0.2372 |
|      |           |         |   |   | -0.0017    | 0.0291          | 0.9037          | -0.1032 | -0.0267 |
|      |           |         |   |   | -0.0536    | -0.0023         | 0.0085          | -0.0992 |         |
| 244. | (0.00004) | RY*( 5) | O | 2 | s( 45.37%) | p 1.02( 46.36%) | d 0.18( 8.27%)  |         |         |
| 245. | (0.00001) | RY*( 6) | O | 2 | s( 0.28%)  | p99.99( 99.70%) | d 0.06( 0.02%)  |         |         |
| 246. | (0.00001) | RY*( 7) | O | 2 | s( 13.96%) | p 6.17( 86.04%) | d 0.00( 0.00%)  |         |         |
| 247. | (0.00001) | RY*( 8) | O | 2 | s( 0.13%)  | p12.37( 1.60%)  | d99.99( 98.27%) |         |         |
| 248. | (0.00001) | RY*( 9) | O | 2 | s( 40.12%) | p 1.49( 59.87%) | d 0.00( 0.01%)  |         |         |
| 249. | (0.00001) | RY*(10) | O | 2 | s( 0.16%)  | p 2.34( 0.37%)  | d99.99( 99.47%) |         |         |
| 250. | (0.00001) | RY*(11) | O | 2 | s( 0.97%)  | p 3.57( 3.48%)  | d98.15( 95.55%) |         |         |
| 251. | (0.00001) | RY*(12) | O | 2 | s( 2.53%)  | p 1.64( 4.14%)  | d36.86( 93.33%) |         |         |
| 252. | (0.00001) | RY*(13) | O | 2 | s( 0.56%)  | p 1.69( 0.95%)  | d99.99( 98.49%) |         |         |
| 253. | (0.00000) | RY*(14) | O | 2 | s( 99.85%) | p 0.00( 0.09%)  | d 0.00( 0.06%)  |         |         |
| 254. | (0.00513) | RY*( 1) | C | 3 | s( 0.68%)  | p99.99( 92.50%) | d 9.97( 6.82%)  |         |         |
|      |           |         |   |   | 0.0000     | 0.0025          | 0.0370          | 0.0739  | -0.0026 |
|      |           |         |   |   | 0.0077     | -0.3570         | -0.0255         | 0.0000  | 0.0374  |
|      |           |         |   |   | 0.0147     | 0.0239          | -0.8910         | 0.0273  | 0.1092  |
|      |           |         |   |   | -0.0406    | 0.1147          | -0.0717         | 0.1905  |         |
| 255. | (0.00305) | RY*( 2) | C | 3 | s( 5.18%)  | p16.55( 85.65%) | d 1.77( 9.18%)  |         |         |
|      |           |         |   |   | 0.0000     | -0.0020         | 0.2225          | -0.0475 | 0.0018  |
|      |           |         |   |   | 0.0043     | 0.7445          | 0.0251          | 0.0017  | -0.4416 |
|      |           |         |   |   | -0.0027    | 0.0025          | -0.3245         | -0.0352 | 0.0830  |
|      |           |         |   |   | 0.2420     | -0.0900         | 0.1243          | 0.0525  |         |
| 256. | (0.00254) | RY*( 3) | C | 3 | s( 4.47%)  | p19.28( 86.25%) | d 2.07( 9.28%)  |         |         |
|      |           |         |   |   | 0.0000     | 0.0029          | 0.2072          | 0.0422  | 0.0037  |
|      |           |         |   |   | 0.0027     | -0.4401         | -0.0638         | -0.0024 | -0.7880 |
|      |           |         |   |   | -0.0692    | -0.0006         | 0.1683          | 0.1033  | 0.0044  |
|      |           |         |   |   | -0.1546    | -0.2107         | 0.0440          | 0.1502  |         |
| 257. | (0.00148) | RY*( 4) | C | 3 | s( 85.65%) | p 0.16( 13.53%) | d 0.01( 0.83%)  |         |         |
|      |           |         |   |   | 0.0000     | -0.0031         | 0.9216          | -0.0846 | -0.0046 |
|      |           |         |   |   | 0.0025     | -0.0678         | 0.1899          | 0.0036  | 0.2852  |
|      |           |         |   |   | -0.0778    | -0.0121         | 0.0607          | 0.0580  | -0.0289 |
|      |           |         |   |   | -0.0566    | 0.0418          | 0.0432          | -0.0248 |         |
| 258. | (0.00077) | RY*( 5) | C | 3 | s( 5.76%)  | p 6.64( 38.23%) | d 9.73( 56.01%) |         |         |
|      |           |         |   |   | 0.0000     | -0.0059         | 0.1653          | 0.1733  | 0.0135  |
|      |           |         |   |   | 0.0024     | 0.0948          | -0.3749         | -0.0140 | -0.0323 |
|      |           |         |   |   | 0.4420     | -0.0020         | 0.0293          | 0.1879  | -0.2220 |

|      |           |         |   |   |                                                                                                                                                                                                                                |
|------|-----------|---------|---|---|--------------------------------------------------------------------------------------------------------------------------------------------------------------------------------------------------------------------------------|
| 259. | (0.00043) | RY*( 6) | C | 3 | 0.0798 -0.0109 -0.7101 -0.0054<br>s( 5.03%)p17.58( 88.41%)d 1.31( 6.57%)<br>0.0000 0.0007 -0.1040 0.1978 0.0181<br>-0.0036 0.0401 0.3718 -0.0017 -0.0088<br>0.0060 0.0082 0.0421 0.8615 0.1731<br>0.1210 0.1427 0.0246 -0.0075 |
| 260. | (0.00040) | RY*( 7) | C | 3 | s( 0.75%)p41.94( 31.45%)d90.44( 67.81%)<br>0.0000 -0.0053 0.0759 -0.0403 0.0092<br>0.0084 0.0488 -0.4635 -0.0153 -0.1046<br>0.2698 -0.0035 0.0340 0.1098 0.0984<br>-0.2652 0.6416 0.3937 -0.1773                               |
| 261. | (0.00036) | RY*( 8) | C | 3 | s( 79.12%)p 0.14( 11.18%)d 0.12( 9.69%)<br>0.0000 0.0018 0.0871 0.8851 -0.0149<br>0.0016 0.0664 -0.2351 0.0015 0.1346<br>-0.1459 -0.0069 0.0514 -0.1002 0.1590<br>-0.0197 -0.1706 0.1979 0.0547                                |
| 262. | (0.00024) | RY*( 9) | C | 3 | s( 1.85%)p 9.26( 17.09%)d43.92( 81.07%)<br>0.0000 0.0032 0.0572 0.1232 -0.0013<br>-0.0165 -0.2518 0.0787 -0.0083 -0.1663<br>-0.1060 -0.0001 0.0660 -0.2402 0.1409<br>0.7163 0.3851 -0.1179 -0.3398                             |
| 263. | (0.00014) | RY*(10) | C | 3 | s( 3.74%)p 3.76( 14.07%)d21.98( 82.19%)<br>0.0000 0.0007 -0.0293 0.1909 -0.0088<br>0.0005 0.0479 0.1846 -0.0045 -0.1413<br>-0.1983 -0.0111 -0.2106 0.0230 -0.5309<br>-0.2931 0.0073 -0.0329 -0.6730                            |
| 264. | (0.00012) | RY*(11) | C | 3 | s( 2.97%)p 9.93( 29.46%)d22.78( 67.57%)<br>0.0000 0.0050 -0.0238 0.1703 -0.0090<br>0.0130 0.1769 0.3579 -0.0101 -0.1419<br>-0.1949 0.0008 0.1089 -0.2549 0.1666<br>-0.3987 0.4937 -0.4136 0.2725                               |
| 265. | (0.00008) | RY*(12) | C | 3 | s( 3.13%)p29.14( 91.29%)d 1.78( 5.58%)                                                                                                                                                                                         |
| 266. | (0.00004) | RY*(13) | C | 3 | s( 2.02%)p 0.48( 0.96%)d48.13( 97.02%)                                                                                                                                                                                         |
| 267. | (0.00000) | RY*(14) | C | 3 | s( 99.69%)p 0.00( 0.09%)d 0.00( 0.22%)                                                                                                                                                                                         |
| 268. | (0.00649) | RY*( 1) | C | 4 | s( 5.75%)p15.12( 87.01%)d 1.26( 7.24%)<br>0.0000 0.0068 0.2354 0.0457 0.0019<br>-0.0096 0.5147 0.0031 0.0157 -0.6198<br>-0.0517 0.0096 -0.4667 -0.0113 -0.0899<br>-0.2079 0.1180 -0.0338 -0.0773                               |
| 269. | (0.00335) | RY*( 2) | C | 4 | s( 0.09%)p99.99( 96.05%)d41.98( 3.86%)<br>0.0000 -0.0014 0.0302 0.0012 -0.0020<br>0.0039 0.5981 -0.1252 -0.0001 0.7139<br>0.0672 -0.0028 -0.2682 0.0296 -0.0385<br>0.0652 0.0485 -0.1594 -0.0716                               |
| 270. | (0.00249) | RY*( 3) | C | 4 | s( 1.53%)p56.28( 85.95%)d 8.20( 12.53%)<br>0.0000 0.0030 0.1232 -0.0085 0.0026<br>0.0088 -0.5300 0.0430 -0.0013 0.1560<br>-0.0175 0.0050 -0.7428 0.0101 -0.1323<br>0.0787 -0.1686 0.0734 -0.2603                               |
| 271. | (0.00113) | RY*( 4) | C | 4 | s( 54.55%)p 0.62( 33.97%)d 0.21( 11.49%)<br>0.0000 -0.0057 0.7315 -0.1013 0.0001<br>0.0007 0.0447 0.1463 0.0047 0.0828<br>-0.2608 0.0070 0.2493 -0.4234 -0.0257<br>0.2217 -0.0852 0.1188 -0.2090                               |
| 272. | (0.00080) | RY*( 5) | C | 4 | s( 2.02%)p 3.62( 7.30%)d44.90( 90.68%)<br>0.0000 -0.0011 0.0314 0.1386 -0.0022<br>0.0035 -0.0133 0.0440 0.0105 0.0361<br>-0.1466 -0.0007 -0.0067 -0.2190 -0.2965<br>-0.3085 -0.6046 -0.4319 0.4141                             |
| 273. | (0.00069) | RY*( 6) | C | 4 | s( 44.25%)p 0.43( 18.92%)d 0.83( 36.83%)<br>0.0000 0.0026 -0.2797 0.6035 0.0004<br>0.0002 0.0735 -0.2547 -0.0017 -0.0640<br>0.0512 0.0127 0.1388 -0.3046 -0.2052<br>0.0435 -0.1748 0.1229 -0.5279                              |
| 274. | (0.00058) | RY*( 7) | C | 4 | s( 51.46%)p 0.59( 30.36%)d 0.35( 18.18%)<br>0.0000 -0.0022 0.1491 0.7016 0.0064<br>-0.0084 -0.0458 0.5002 0.0089 0.1495<br>-0.1133 -0.0008 -0.0600 0.1116 0.2581<br>-0.1383 0.2280 0.0745 0.1963                               |
| 275. | (0.00041) | RY*( 8) | C | 4 | s( 23.13%)p 2.53( 58.49%)d 0.79( 18.38%)<br>0.0000 0.0054 0.4007 0.2659 -0.0060                                                                                                                                                |

|      |           |                       |   |   |  |             |                  |                  |         |         |         |
|------|-----------|-----------------------|---|---|--|-------------|------------------|------------------|---------|---------|---------|
|      |           |                       |   |   |  |             | -0.0058          | -0.2090          | -0.7158 | -0.0046 | -0.0237 |
|      |           |                       |   |   |  |             | 0.1640           | -0.0069          | -0.0123 | 0.0322  | 0.2289  |
|      |           |                       |   |   |  |             | 0.0063           | 0.1777           | -0.2438 | 0.2009  |         |
| 276. | (0.00038) | R <sub>Y</sub> * ( 9) | C | 4 |  | s ( 2.43%)  | p26.53 ( 64.55%) | d13.57 ( 33.02%) |         |         |         |
|      |           |                       |   |   |  |             | 0.0000           | 0.0003           | 0.1519  | -0.0341 | 0.0096  |
|      |           |                       |   |   |  |             | 0.0118           | 0.0649           | 0.0880  | 0.0055  | 0.0347  |
|      |           |                       |   |   |  |             | 0.7696           | -0.0059          | -0.0243 | -0.1980 | 0.1179  |
|      |           |                       |   |   |  |             | -0.2223          | -0.2560          | 0.4247  | 0.1447  |         |
| 277. | (0.00033) | R <sub>Y</sub> * (10) | C | 4 |  | s ( 10.15%) | p 6.58 ( 66.72%) | d 2.28 ( 23.13%) |         |         |         |
|      |           |                       |   |   |  |             | 0.0000           | 0.0023           | 0.3049  | 0.0923  | 0.0010  |
|      |           |                       |   |   |  |             | 0.0077           | 0.0462           | 0.0664  | -0.0038 | -0.0397 |
|      |           |                       |   |   |  |             | 0.1598           | 0.0046           | 0.2205  | 0.7648  | -0.1885 |
|      |           |                       |   |   |  |             | 0.0298           | -0.3350          | -0.0796 | -0.2763 |         |
| 278. | (0.00012) | R <sub>Y</sub> * (11) | C | 4 |  | s ( 2.38%)  | p 3.64 ( 8.64%)  | d37.46 ( 88.98%) |         |         |         |
|      |           |                       |   |   |  |             | 0.0000           | -0.0056          | 0.1158  | -0.1005 | 0.0148  |
|      |           |                       |   |   |  |             | -0.0115          | -0.1709          | -0.0162 | 0.0132  | 0.1793  |
|      |           |                       |   |   |  |             | 0.0335           | 0.0118           | 0.1508  | -0.0228 | -0.4475 |
|      |           |                       |   |   |  |             | -0.6812          | 0.4372           | -0.0030 | -0.1853 |         |
| 279. | (0.00010) | R <sub>Y</sub> * (12) | C | 4 |  | s ( 0.04%)  | p99.99 ( 39.77%) | d99.99 ( 60.19%) |         |         |         |
|      |           |                       |   |   |  |             | 0.0000           | 0.0013           | -0.0053 | -0.0109 | 0.0169  |
|      |           |                       |   |   |  |             | -0.0017          | -0.0856          | 0.3448  | -0.0016 | -0.0997 |
|      |           |                       |   |   |  |             | 0.4694           | 0.0007           | 0.0299  | -0.2007 | 0.0038  |
|      |           |                       |   |   |  |             | 0.2152           | 0.2044           | -0.6831 | -0.2171 |         |
| 280. | (0.00005) | R <sub>Y</sub> * (13) | C | 4 |  | s ( 2.45%)  | p 0.96 ( 2.35%)  | d38.90 ( 95.21%) |         |         |         |
| 281. | (0.00000) | R <sub>Y</sub> * (14) | C | 4 |  | s ( 99.82%) | p 0.00 ( 0.06%)  | d 0.00 ( 0.12%)  |         |         |         |
| 282. | (0.00510) | R <sub>Y</sub> * ( 1) | C | 5 |  | s ( 0.71%)  | p99.99 ( 92.35%) | d 9.75 ( 6.94%)  |         |         |         |
|      |           |                       |   |   |  |             | 0.0000           | 0.0012           | 0.0092  | 0.0838  | -0.0015 |
|      |           |                       |   |   |  |             | -0.0180          | 0.6166           | -0.0335 | 0.0080  | -0.2812 |
|      |           |                       |   |   |  |             | 0.0087           | -0.0148          | 0.6800  | -0.0064 | -0.1200 |
|      |           |                       |   |   |  |             | 0.0290           | -0.0858          | 0.0821  | -0.2001 |         |
| 283. | (0.00298) | R <sub>Y</sub> * ( 2) | C | 5 |  | s ( 1.73%)  | p51.82 ( 89.66%) | d 4.98 ( 8.61%)  |         |         |         |
|      |           |                       |   |   |  |             | 0.0000           | 0.0013           | 0.1314  | -0.0047 | 0.0047  |
|      |           |                       |   |   |  |             | -0.0032          | -0.0355          | -0.0109 | -0.0028 | -0.8832 |
|      |           |                       |   |   |  |             | -0.0727          | -0.0033          | -0.3309 | 0.0220  | 0.1558  |
|      |           |                       |   |   |  |             | 0.1860           | -0.0060          | 0.1644  | 0.0132  |         |
| 284. | (0.00284) | R <sub>Y</sub> * ( 3) | C | 5 |  | s ( 6.26%)  | p13.76 ( 86.18%) | d 1.21 ( 7.56%)  |         |         |         |
|      |           |                       |   |   |  |             | 0.0000           | -0.0019          | 0.2501  | -0.0073 | 0.0046  |
|      |           |                       |   |   |  |             | 0.0014           | 0.7076           | 0.0641  | 0.0013  | 0.2088  |
|      |           |                       |   |   |  |             | 0.0753           | -0.0051          | -0.5546 | 0.0063  | -0.0513 |
|      |           |                       |   |   |  |             | 0.1158           | -0.2002          | -0.1026 | 0.0945  |         |
| 285. | (0.00148) | R <sub>Y</sub> * ( 4) | C | 5 |  | s ( 90.77%) | p 0.07 ( 6.54%)  | d 0.03 ( 2.69%)  |         |         |         |
|      |           |                       |   |   |  |             | 0.0000           | -0.0038          | 0.9516  | -0.0468 | -0.0044 |
|      |           |                       |   |   |  |             | 0.0145           | -0.1588          | 0.0403  | -0.0031 | 0.0681  |
|      |           |                       |   |   |  |             | -0.0163          | 0.0000           | 0.1824  | -0.0137 | 0.0114  |
|      |           |                       |   |   |  |             | -0.1102          | 0.1090           | 0.0520  | 0.0023  |         |
| 286. | (0.00067) | R <sub>Y</sub> * ( 5) | C | 5 |  | s ( 0.56%)  | p10.43 ( 5.79%)  | d99.99 ( 93.65%) |         |         |         |
|      |           |                       |   |   |  |             | 0.0000           | -0.0019          | 0.0176  | 0.0723  | 0.0047  |
|      |           |                       |   |   |  |             | 0.0108           | 0.0553           | -0.0212 | 0.0121  | 0.0751  |
|      |           |                       |   |   |  |             | 0.1935           | -0.0064          | -0.0348 | 0.0992  | 0.1657  |
|      |           |                       |   |   |  |             | 0.5009           | 0.6409           | -0.2619 | -0.4229 |         |
| 287. | (0.00049) | R <sub>Y</sub> * ( 6) | C | 5 |  | s ( 9.08%)  | p 7.61 ( 69.14%) | d 2.40 ( 21.78%) |         |         |         |
|      |           |                       |   |   |  |             | 0.0000           | 0.0070           | 0.0236  | 0.3003  | 0.0000  |
|      |           |                       |   |   |  |             | -0.0072          | -0.0488          | 0.1314  | 0.0092  | 0.1029  |
|      |           |                       |   |   |  |             | -0.3121          | 0.0109           | 0.0680  | -0.7476 | 0.2285  |
|      |           |                       |   |   |  |             | 0.3738           | -0.1570          | -0.0077 | 0.0330  |         |
| 288. | (0.00041) | R <sub>Y</sub> * ( 7) | C | 5 |  | s ( 51.28%) | p 0.74 ( 38.19%) | d 0.21 ( 10.53%) |         |         |         |
|      |           |                       |   |   |  |             | 0.0000           | -0.0004          | 0.0720  | 0.7125  | 0.0063  |
|      |           |                       |   |   |  |             | 0.0010           | -0.0864          | -0.5170 | -0.0113 | -0.0648 |
|      |           |                       |   |   |  |             | 0.2944           | -0.0055          | -0.1098 | -0.0637 | -0.1516 |
|      |           |                       |   |   |  |             | -0.1956          | -0.1051          | -0.1515 | -0.1000 |         |
| 289. | (0.00028) | R <sub>Y</sub> * ( 8) | C | 5 |  | s ( 32.91%) | p 1.79 ( 58.94%) | d 0.25 ( 8.15%)  |         |         |         |
|      |           |                       |   |   |  |             | 0.0000           | -0.0005          | 0.0118  | 0.5733  | -0.0160 |
|      |           |                       |   |   |  |             | 0.0047           | -0.0556          | 0.4845  | 0.0000  | 0.0755  |
|      |           |                       |   |   |  |             | -0.1739          | 0.0055           | 0.0649  | 0.5580  | 0.1180  |
|      |           |                       |   |   |  |             | 0.1667           | -0.1228          | 0.0980  | 0.1229  |         |
| 290. | (0.00021) | R <sub>Y</sub> * ( 9) | C | 5 |  | s ( 2.29%)  | p 4.57 ( 10.48%) | d38.05 ( 87.23%) |         |         |         |
|      |           |                       |   |   |  |             | 0.0000           | 0.0001           | -0.0628 | 0.1378  | 0.0001  |
|      |           |                       |   |   |  |             | 0.0080           | 0.1854           | -0.1474 | 0.0094  | 0.1718  |
|      |           |                       |   |   |  |             | -0.0526          | -0.0055          | -0.1141 | -0.0564 | 0.3541  |
|      |           |                       |   |   |  |             | -0.2666          | 0.3391           | 0.7457  | -0.0692 |         |
| 291. | (0.00013) | R <sub>Y</sub> * (10) | C | 5 |  | s ( 0.13%)  | p99.99 ( 14.66%) | d99.99 ( 85.20%) |         |         |         |

|      |           |         |   |   |                                          |         |         |         |         |
|------|-----------|---------|---|---|------------------------------------------|---------|---------|---------|---------|
|      |           |         |   |   | 0.0000                                   | -0.0032 | -0.0143 | 0.0316  | -0.0102 |
|      |           |         |   |   | 0.0022                                   | 0.1517  | -0.2859 | 0.0011  | -0.0458 |
|      |           |         |   |   | -0.0538                                  | 0.0148  | 0.1790  | 0.0683  | 0.3241  |
|      |           |         |   |   | 0.0186                                   | 0.2922  | -0.2708 | 0.7668  |         |
| 292. | (0.00011) | RY*(11) | C | 5 | s( 3.81%)p 9.75( 37.17%)d15.48( 59.02%)  |         |         |         |         |
|      |           |         |   |   | 0.0000                                   | 0.0004  | -0.0594 | 0.1860  | 0.0030  |
|      |           |         |   |   | 0.0089                                   | 0.1205  | 0.4862  | -0.0104 | -0.1791 |
|      |           |         |   |   | -0.1112                                  | -0.0044 | -0.1040 | -0.2556 | -0.2106 |
|      |           |         |   |   | -0.5275                                  | 0.4444  | -0.2642 | 0.0164  |         |
| 293. | (0.00007) | RY*(12) | C | 5 | s( 0.11%)p99.99( 85.97%)d99.99( 13.92%)  |         |         |         |         |
| 294. | (0.00004) | RY*(13) | C | 5 | s( 1.19%)p 4.08( 4.87%)d78.76( 93.94%)   |         |         |         |         |
| 295. | (0.00000) | RY*(14) | C | 5 | s( 99.18%)p 0.00( 0.19%)d 0.01( 0.62%)   |         |         |         |         |
| 296. | (0.00409) | RY*( 1) | C | 6 | s( 1.65%)p54.27( 89.36%)d 5.47( 9.00%)   |         |         |         |         |
|      |           |         |   |   | 0.0000                                   | 0.0055  | 0.1269  | -0.0176 | 0.0032  |
|      |           |         |   |   | -0.0071                                  | -0.2344 | 0.1050  | -0.0037 | -0.1589 |
|      |           |         |   |   | -0.0688                                  | -0.0236 | -0.8916 | -0.0461 | 0.1638  |
|      |           |         |   |   | 0.0570                                   | 0.0491  | -0.0536 | 0.2337  |         |
| 297. | (0.00143) | RY*( 2) | C | 6 | s( 0.31%)p99.99( 98.56%)d 3.70( 1.13%)   |         |         |         |         |
|      |           |         |   |   | 0.0000                                   | 0.0072  | 0.0532  | 0.0101  | 0.0085  |
|      |           |         |   |   | -0.0219                                  | 0.8256  | 0.0151  | 0.0189  | -0.5275 |
|      |           |         |   |   | -0.0844                                  | 0.0028  | -0.1180 | -0.0611 | -0.0388 |
|      |           |         |   |   | 0.0606                                   | -0.0589 | 0.0487  | -0.0168 |         |
| 298. | (0.00131) | RY*( 3) | C | 6 | s( 0.03%)p99.99( 91.64%)d99.99( 8.33%)   |         |         |         |         |
|      |           |         |   |   | 0.0000                                   | 0.0004  | 0.0160  | -0.0062 | -0.0002 |
|      |           |         |   |   | 0.0115                                   | 0.4240  | -0.1737 | 0.0091  | 0.7529  |
|      |           |         |   |   | -0.2559                                  | -0.0038 | -0.2474 | 0.1129  | 0.0113  |
|      |           |         |   |   | -0.1521                                  | -0.1402 | 0.1700  | 0.1069  |         |
| 299. | (0.00060) | RY*( 4) | C | 6 | s( 93.76%)p 0.04( 3.69%)d 0.03( 2.55%)   |         |         |         |         |
|      |           |         |   |   | 0.0000                                   | -0.0009 | 0.9589  | -0.1347 | -0.0046 |
|      |           |         |   |   | 0.0164                                   | -0.0228 | 0.0998  | -0.0064 | 0.0446  |
|      |           |         |   |   | -0.0170                                  | 0.0170  | 0.1244  | 0.0898  | 0.0297  |
|      |           |         |   |   | 0.0681                                   | -0.1043 | -0.0056 | -0.0954 |         |
| 300. | (0.00048) | RY*( 5) | C | 6 | s( 0.08%)p99.99( 8.98%)d99.99( 90.94%)   |         |         |         |         |
|      |           |         |   |   | 0.0000                                   | -0.0005 | 0.0278  | 0.0047  | -0.0050 |
|      |           |         |   |   | 0.0051                                   | -0.1300 | -0.0875 | 0.0077  | -0.1884 |
|      |           |         |   |   | -0.1425                                  | -0.0016 | 0.0668  | 0.0699  | 0.2907  |
|      |           |         |   |   | -0.1957                                  | 0.1894  | 0.8664  | -0.0043 |         |
| 301. | (0.00015) | RY*( 6) | C | 6 | s( 1.33%)p18.94( 25.28%)d54.99( 73.39%)  |         |         |         |         |
|      |           |         |   |   | 0.0000                                   | -0.0045 | 0.1123  | 0.0179  | -0.0197 |
|      |           |         |   |   | -0.0163                                  | 0.0962  | -0.1892 | 0.0141  | -0.0842 |
|      |           |         |   |   | 0.2177                                   | 0.0084  | 0.0209  | 0.3903  | 0.0125  |
|      |           |         |   |   | -0.5980                                  | 0.4866  | -0.2684 | 0.2594  |         |
| 302. | (0.00009) | RY*( 7) | C | 6 | s( 4.03%)p17.00( 68.52%)d 6.81( 27.45%)  |         |         |         |         |
| 303. | (0.00005) | RY*( 8) | C | 6 | s( 7.37%)p 3.05( 22.46%)d 9.53( 70.17%)  |         |         |         |         |
| 304. | (0.00006) | RY*( 9) | C | 6 | s( 1.37%)p51.39( 70.30%)d20.72( 28.34%)  |         |         |         |         |
| 305. | (0.00006) | RY*(10) | C | 6 | s( 47.29%)p 0.95( 45.01%)d 0.16( 7.70%)  |         |         |         |         |
| 306. | (0.00002) | RY*(11) | C | 6 | s( 12.04%)p 2.73( 32.84%)d 4.58( 55.12%) |         |         |         |         |
| 307. | (0.00001) | RY*(12) | C | 6 | s( 32.23%)p 0.87( 28.09%)d 1.23( 39.68%) |         |         |         |         |
| 308. | (0.00002) | RY*(13) | C | 6 | s( 1.09%)p14.05( 15.36%)d76.40( 83.54%)  |         |         |         |         |
| 309. | (0.00000) | RY*(14) | C | 6 | s( 97.45%)p 0.00( 0.04%)d 0.03( 2.50%)   |         |         |         |         |
| 310. | (0.00412) | RY*( 1) | C | 7 | s( 0.99%)p91.53( 90.94%)d 8.12( 8.07%)   |         |         |         |         |
|      |           |         |   |   | 0.0000                                   | 0.0005  | 0.0892  | 0.0441  | 0.0064  |
|      |           |         |   |   | 0.0191                                   | 0.5604  | -0.0366 | -0.0187 | -0.5668 |
|      |           |         |   |   | 0.0268                                   | -0.0168 | -0.5194 | 0.0357  | -0.0660 |
|      |           |         |   |   | -0.2258                                  | 0.1207  | -0.0461 | -0.0929 |         |
| 311. | (0.00185) | RY*( 2) | C | 7 | s( 0.07%)p99.99( 99.93%)d 0.07( 0.00%)   |         |         |         |         |
|      |           |         |   |   | 0.0000                                   | -0.0003 | 0.0256  | 0.0016  | 0.0010  |
|      |           |         |   |   | -0.0227                                  | 0.5460  | 0.1872  | 0.0068  | -0.1480 |
|      |           |         |   |   | -0.0531                                  | -0.0312 | 0.7559  | 0.2618  | -0.0041 |
|      |           |         |   |   | 0.0025                                   | -0.0044 | -0.0010 | -0.0011 |         |
| 312. | (0.00091) | RY*( 3) | C | 7 | s( 0.20%)p99.99( 92.84%)d34.38( 6.96%)   |         |         |         |         |
|      |           |         |   |   | 0.0000                                   | 0.0008  | -0.0286 | 0.0347  | -0.0006 |
|      |           |         |   |   | 0.0044                                   | 0.5296  | -0.1162 | 0.0062  | 0.7419  |
|      |           |         |   |   | -0.1529                                  | -0.0022 | -0.2385 | 0.0604  | 0.0595  |
|      |           |         |   |   | -0.0965                                  | -0.0404 | 0.2314  | 0.0398  |         |
| 313. | (0.00054) | RY*( 4) | C | 7 | s( 31.82%)p 0.04( 1.17%)d 2.11( 67.00%)  |         |         |         |         |
|      |           |         |   |   | 0.0000                                   | -0.0007 | 0.5641  | 0.0036  | 0.0053  |
|      |           |         |   |   | -0.0105                                  | -0.0432 | 0.0786  | -0.0005 | 0.0217  |
|      |           |         |   |   | 0.0498                                   | 0.0078  | 0.0114  | -0.0205 | 0.3133  |
|      |           |         |   |   | 0.2650                                   | 0.5326  | 0.3620  | -0.2949 |         |
| 314. | (0.00051) | RY*( 5) | C | 7 | s( 67.58%)p 0.02( 1.28%)d 0.46( 31.14%)  |         |         |         |         |

|      |           |         |     |                                          |         |         |         |         |
|------|-----------|---------|-----|------------------------------------------|---------|---------|---------|---------|
|      |           |         |     | 0.0000                                   | -0.0006 | 0.8061  | 0.1611  | 0.0026  |
|      |           |         |     | -0.0052                                  | -0.0323 | -0.0059 | 0.0126  | 0.0744  |
|      |           |         |     | -0.0677                                  | 0.0057  | 0.0158  | -0.0336 | -0.1973 |
|      |           |         |     | -0.1567                                  | -0.3885 | -0.2305 | 0.2095  |         |
| 315. | (0.00020) | RY*( 6) | C 7 | s( 0.09%)p99.99( 33.18%)d99.99( 66.72%)  |         |         |         |         |
|      |           |         |     | 0.0000                                   | 0.0015  | -0.0072 | 0.0289  | -0.0039 |
|      |           |         |     | -0.0187                                  | 0.1082  | -0.2940 | 0.0046  | -0.0339 |
|      |           |         |     | 0.0531                                   | -0.0270 | 0.1434  | -0.4562 | -0.3354 |
|      |           |         |     | 0.1460                                   | -0.3243 | 0.2072  | -0.6208 |         |
| 316. | (0.00007) | RY*( 7) | C 7 | s( 29.40%)p 1.36( 40.10%)d 1.04( 30.50%) |         |         |         |         |
| 317. | (0.00004) | RY*( 8) | C 7 | s( 1.01%)p33.02( 33.42%)d64.79( 65.57%)  |         |         |         |         |
| 318. | (0.00005) | RY*( 9) | C 7 | s( 6.51%)p10.07( 65.60%)d 4.28( 27.88%)  |         |         |         |         |
| 319. | (0.00004) | RY*(10) | C 7 | s( 20.16%)p 2.65( 53.44%)d 1.31( 26.40%) |         |         |         |         |
| 320. | (0.00001) | RY*(11) | C 7 | s( 37.76%)p 1.46( 55.28%)d 0.18( 6.97%)  |         |         |         |         |
| 321. | (0.00000) | RY*(12) | C 7 | s( 2.81%)p 8.08( 22.71%)d26.51( 74.48%)  |         |         |         |         |
| 322. | (0.00000) | RY*(13) | C 7 | s( 3.05%)p 3.19( 9.72%)d28.61( 87.23%)   |         |         |         |         |
| 323. | (0.00000) | RY*(14) | C 7 | s( 98.59%)p 0.01( 0.53%)d 0.01( 0.88%)   |         |         |         |         |
| 324. | (0.00422) | RY*( 1) | C 8 | s( 1.92%)p46.46( 89.25%)d 4.59( 8.83%)   |         |         |         |         |
|      |           |         |     | 0.0000                                   | 0.0060  | 0.1383  | -0.0070 | 0.0026  |
|      |           |         |     | 0.0172                                   | 0.6836  | 0.0547  | -0.0115 | -0.4740 |
|      |           |         |     | -0.0416                                  | 0.0138  | 0.4265  | -0.1157 | -0.0779 |
|      |           |         |     | 0.1418                                   | -0.1728 | 0.0728  | -0.1641 |         |
| 325. | (0.00147) | RY*( 2) | C 8 | s( 0.32%)p99.99( 97.86%)d 5.68( 1.82%)   |         |         |         |         |
|      |           |         |     | 0.0000                                   | 0.0069  | 0.0550  | -0.0098 | 0.0056  |
|      |           |         |     | -0.0037                                  | 0.4957  | -0.0199 | 0.0139  | -0.0414 |
|      |           |         |     | -0.1351                                  | 0.0209  | -0.8432 | 0.0317  | 0.0561  |
|      |           |         |     | 0.0166                                   | 0.0008  | 0.0953  | 0.0752  |         |
| 326. | (0.00131) | RY*( 3) | C 8 | s( 0.06%)p99.99( 93.97%)d95.04( 5.96%)   |         |         |         |         |
|      |           |         |     | 0.0000                                   | 0.0004  | -0.0137 | 0.0197  | 0.0073  |
|      |           |         |     | -0.0068                                  | -0.3968 | 0.1978  | 0.0050  | -0.8045 |
|      |           |         |     | 0.1538                                   | 0.0148  | -0.2515 | -0.0935 | -0.0564 |
|      |           |         |     | 0.0696                                   | 0.0551  | -0.2183 | 0.0300  |         |
| 327. | (0.00060) | RY*( 4) | C 8 | s( 92.45%)p 0.05( 4.59%)d 0.03( 2.97%)   |         |         |         |         |
|      |           |         |     | 0.0000                                   | -0.0007 | 0.9514  | -0.1387 | -0.0079 |
|      |           |         |     | -0.0107                                  | -0.1389 | -0.0277 | 0.0016  | 0.0693  |
|      |           |         |     | -0.0578                                  | -0.0200 | -0.0114 | -0.1304 | 0.1266  |
|      |           |         |     | 0.0815                                   | 0.0421  | -0.0653 | 0.0306  |         |
| 328. | (0.00046) | RY*( 5) | C 8 | s( 0.66%)p 9.49( 6.28%)d99.99( 93.06%)   |         |         |         |         |
|      |           |         |     | 0.0000                                   | 0.0005  | 0.0799  | -0.0132 | -0.0071 |
|      |           |         |     | -0.0063                                  | -0.1360 | -0.0360 | -0.0055 | -0.1563 |
|      |           |         |     | -0.1322                                  | 0.0026  | 0.0177  | -0.0261 | -0.0914 |
|      |           |         |     | -0.5626                                  | -0.5355 | 0.4397  | 0.3544  |         |
| 329. | (0.00016) | RY*( 6) | C 8 | s( 5.18%)p 9.27( 48.08%)d 9.01( 46.74%)  |         |         |         |         |
|      |           |         |     | 0.0000                                   | -0.0071 | 0.1748  | 0.1435  | -0.0252 |
|      |           |         |     | -0.0101                                  | 0.0402  | -0.4083 | 0.0111  | -0.0302 |
|      |           |         |     | 0.4742                                   | 0.0094  | -0.1000 | 0.2762  | -0.4040 |
|      |           |         |     | -0.3329                                  | -0.0043 | -0.0608 | -0.4355 |         |
| 330. | (0.00012) | RY*( 7) | C 8 | s( 4.04%)p10.55( 42.63%)d13.19( 53.33%)  |         |         |         |         |
|      |           |         |     | 0.0000                                   | -0.0095 | 0.0686  | 0.1858  | 0.0332  |
|      |           |         |     | -0.0002                                  | 0.1424  | -0.1116 | -0.0047 | -0.0230 |
|      |           |         |     | 0.4283                                   | -0.0182 | 0.0914  | 0.4482  | 0.1460  |
|      |           |         |     | 0.2264                                   | -0.1061 | -0.1614 | 0.6506  |         |
| 331. | (0.00008) | RY*( 8) | C 8 | s( 6.28%)p 9.23( 57.92%)d 5.70( 35.80%)  |         |         |         |         |
| 332. | (0.00005) | RY*( 9) | C 8 | s( 16.98%)p 0.93( 15.83%)d 3.96( 67.19%) |         |         |         |         |
| 333. | (0.00004) | RY*(10) | C 8 | s( 0.87%)p99.99( 90.77%)d 9.65( 8.36%)   |         |         |         |         |
| 334. | (0.00002) | RY*(11) | C 8 | s( 1.58%)p 8.56( 13.53%)d53.72( 84.89%)  |         |         |         |         |
| 335. | (0.00002) | RY*(12) | C 8 | s( 24.34%)p 1.53( 37.16%)d 1.58( 38.50%) |         |         |         |         |
| 336. | (0.00002) | RY*(13) | C 8 | s( 48.12%)p 0.05( 2.23%)d 1.03( 49.65%)  |         |         |         |         |
| 337. | (0.00000) | RY*(14) | C 8 | s( 97.23%)p 0.00( 0.04%)d 0.03( 2.73%)   |         |         |         |         |
| 338. | (0.00631) | RY*( 1) | N 9 | s( 0.08%)p99.99( 99.07%)d11.12( 0.85%)   |         |         |         |         |
|      |           |         |     | 0.0000                                   | -0.0029 | 0.0271  | 0.0050  | 0.0008  |
|      |           |         |     | -0.0117                                  | 0.7015  | -0.0053 | 0.0042  | -0.2809 |
|      |           |         |     | 0.0167                                   | -0.0046 | 0.6472  | 0.0161  | 0.0485  |
|      |           |         |     | 0.0289                                   | -0.0416 | 0.0103  | -0.0592 |         |
| 339. | (0.00502) | RY*( 2) | N 9 | s( 6.40%)p13.23( 84.72%)d 1.39( 8.87%)   |         |         |         |         |
|      |           |         |     | 0.0000                                   | -0.0039 | 0.2513  | -0.0298 | 0.0010  |
|      |           |         |     | -0.0081                                  | 0.3050  | -0.0189 | 0.0064  | -0.5950 |
|      |           |         |     | 0.0386                                   | 0.0076  | -0.6309 | 0.0078  | 0.2447  |
|      |           |         |     | 0.0918                                   | -0.1167 | -0.0803 | -0.0183 |         |
| 340. | (0.00155) | RY*( 3) | N 9 | s( 0.24%)p99.99( 87.77%)d49.36( 11.99%)  |         |         |         |         |
|      |           |         |     | 0.0000                                   | 0.0034  | 0.0486  | -0.0073 | -0.0008 |

|      |           |         |   |    |            |                 |                 |         |         |
|------|-----------|---------|---|----|------------|-----------------|-----------------|---------|---------|
|      |           |         |   |    | 0.0116     | 0.5509          | 0.0328          | 0.0115  | 0.6787  |
|      |           |         |   |    | 0.0942     | -0.0038         | -0.3209         | -0.0193 | 0.1739  |
|      |           |         |   |    | -0.0490    | -0.0348         | 0.2915          | 0.0321  |         |
| 341. | (0.00096) | RY*( 4) | N | 9  | s( 82.79%) | p 0.08( 6.62%)  | d 0.13( 10.59%) |         |         |
|      |           |         |   |    | 0.0000     | 0.0055          | 0.9088          | 0.0449  | -0.0014 |
|      |           |         |   |    | -0.0025    | -0.1539         | -0.0068         | -0.0036 | 0.0945  |
|      |           |         |   |    | 0.0692     | -0.0083         | 0.1682          | 0.0186  | -0.1312 |
|      |           |         |   |    | -0.0880    | -0.2546         | 0.1116          | 0.0608  |         |
| 342. | (0.00073) | RY*( 5) | N | 9  | s( 7.33%)  | p 0.11( 0.83%)  | d12.53( 91.83%) |         |         |
|      |           |         |   |    | 0.0000     | 0.0017          | 0.2620          | 0.0684  | 0.0011  |
|      |           |         |   |    | 0.0082     | -0.0144         | -0.0405         | 0.0057  | 0.0657  |
|      |           |         |   |    | -0.0388    | -0.0005         | 0.0202          | 0.0131  | 0.0730  |
|      |           |         |   |    | 0.5953     | 0.6947          | 0.0413          | -0.2725 |         |
| 343. | (0.00052) | RY*( 6) | N | 9  | s( 0.90%)  | p17.15( 15.45%) | d92.87( 83.65%) |         |         |
|      |           |         |   |    | 0.0000     | 0.0018          | 0.0679          | -0.0663 | 0.0014  |
|      |           |         |   |    | 0.0165     | 0.1695          | -0.1089         | 0.0246  | 0.2774  |
|      |           |         |   |    | -0.1388    | -0.0095         | -0.0687         | 0.1097  | -0.2219 |
|      |           |         |   |    | 0.1727     | -0.1883         | -0.8372         | -0.1455 |         |
| 344. | (0.00038) | RY*( 7) | N | 9  | s( 2.31%)  | p 3.05( 7.03%)  | d39.32( 90.66%) |         |         |
|      |           |         |   |    | 0.0000     | 0.0001          | 0.1200          | 0.0929  | 0.0048  |
|      |           |         |   |    | 0.0095     | 0.0380          | 0.1207          | -0.0004 | 0.0234  |
|      |           |         |   |    | -0.0829    | 0.0014          | 0.0471          | 0.2112  | 0.2871  |
|      |           |         |   |    | -0.2611    | 0.4250          | -0.3063         | 0.6940  |         |
| 345. | (0.00016) | RY*( 8) | N | 9  | s( 0.13%)  | p99.99( 30.31%) | d99.99( 69.56%) |         |         |
|      |           |         |   |    | 0.0000     | -0.0008         | -0.0213         | 0.0280  | 0.0052  |
|      |           |         |   |    | 0.0057     | 0.1928          | 0.2448          | -0.0038 | -0.1133 |
|      |           |         |   |    | 0.0069     | -0.0113         | -0.1852         | 0.3983  | -0.7851 |
|      |           |         |   |    | -0.0590    | 0.1947          | 0.1669          | 0.0997  |         |
| 346. | (0.00013) | RY*( 9) | N | 9  | s( 19.33%) | p 2.74( 53.01%) | d 1.43( 27.66%) |         |         |
|      |           |         |   |    | 0.0000     | 0.0084          | -0.0735         | 0.4332  | -0.0138 |
|      |           |         |   |    | -0.0095    | -0.0830         | 0.1801          | 0.0023  | 0.0359  |
|      |           |         |   |    | -0.3633    | -0.0031         | 0.0423          | 0.5964  | 0.2580  |
|      |           |         |   |    | 0.2810     | -0.3329         | 0.1372          | -0.0374 |         |
| 347. | (0.00008) | RY*(10) | N | 9  | s( 24.73%) | p 1.76( 43.41%) | d 1.29( 31.85%) |         |         |
| 348. | (0.00006) | RY*(11) | N | 9  | s( 17.94%) | p 4.03( 72.38%) | d 0.54( 9.68%)  |         |         |
| 349. | (0.00004) | RY*(12) | N | 9  | s( 36.31%) | p 0.35( 12.55%) | d 1.41( 51.15%) |         |         |
| 350. | (0.00004) | RY*(13) | N | 9  | s( 1.63%)  | p53.20( 86.93%) | d 7.00( 11.44%) |         |         |
| 351. | (0.00000) | RY*(14) | N | 9  | s( 99.93%) | p 0.00( 0.02%)  | d 0.00( 0.06%)  |         |         |
| 352. | (0.00546) | RY*( 1) | C | 10 | s( 2.87%)  | p30.92( 88.75%) | d 2.92( 8.38%)  |         |         |
|      |           |         |   |    | 0.0000     | 0.0191          | 0.1498          | 0.0763  | 0.0087  |
|      |           |         |   |    | -0.0323    | -0.5458         | 0.0398          | -0.0080 | -0.5751 |
|      |           |         |   |    | 0.0938     | -0.0207         | 0.4909          | -0.0776 | -0.1045 |
|      |           |         |   |    | 0.1253     | 0.2389          | -0.0016         | 0.0076  |         |
| 353. | (0.00341) | RY*( 2) | C | 10 | s( 24.58%) | p 1.68( 41.26%) | d 1.39( 34.16%) |         |         |
|      |           |         |   |    | 0.0000     | -0.0119         | 0.4577          | -0.1901 | -0.0057 |
|      |           |         |   |    | -0.0108    | 0.3851          | -0.1683         | -0.0003 | 0.2261  |
|      |           |         |   |    | 0.0616     | -0.0348         | 0.4169          | 0.0773  | 0.3217  |
|      |           |         |   |    | 0.2137     | 0.3950          | 0.1844          | 0.0494  |         |
| 354. | (0.00210) | RY*( 3) | C | 10 | s( 13.16%) | p 6.19( 81.42%) | d 0.41( 5.42%)  |         |         |
|      |           |         |   |    | 0.0000     | -0.0054         | 0.3550          | -0.0740 | -0.0088 |
|      |           |         |   |    | -0.0195    | 0.4076          | 0.1868          | 0.0279  | -0.4997 |
|      |           |         |   |    | -0.4994    | 0.0194          | -0.1353         | -0.3069 | -0.0963 |
|      |           |         |   |    | -0.0080    | -0.1619         | 0.1195          | -0.0662 |         |
| 355. | (0.00162) | RY*( 4) | C | 10 | s( 37.93%) | p 1.01( 38.34%) | d 0.63( 23.73%) |         |         |
|      |           |         |   |    | 0.0000     | 0.0005          | 0.5704          | -0.2322 | 0.0027  |
|      |           |         |   |    | -0.0035    | -0.2807         | -0.4851         | -0.0265 | 0.0721  |
|      |           |         |   |    | 0.0221     | 0.0226          | -0.1293         | 0.2137  | -0.1928 |
|      |           |         |   |    | -0.0411    | -0.4024         | -0.1129         | -0.1541 |         |
| 356. | (0.00138) | RY*( 5) | C | 10 | s( 5.24%)  | p13.90( 72.87%) | d 4.18( 21.89%) |         |         |
|      |           |         |   |    | 0.0000     | 0.0032          | 0.2281          | -0.0185 | -0.0024 |
|      |           |         |   |    | -0.0152    | -0.3366         | 0.3327          | -0.0009 | 0.0306  |
|      |           |         |   |    | -0.2737    | 0.0051          | -0.4857         | 0.4390  | 0.1494  |
|      |           |         |   |    | 0.1158     | 0.3596          | 0.1878          | 0.1363  |         |
| 357. | (0.00126) | RY*( 6) | C | 10 | s( 0.94%)  | p74.80( 70.56%) | d30.21( 28.50%) |         |         |
|      |           |         |   |    | 0.0000     | -0.0022         | -0.0107         | 0.0955  | -0.0141 |
|      |           |         |   |    | 0.0008     | 0.2786          | -0.2208         | -0.0022 | -0.5078 |
|      |           |         |   |    | 0.3909     | -0.0009         | -0.3430         | 0.2256  | 0.2969  |
|      |           |         |   |    | 0.1500     | 0.0990          | -0.4028         | 0.0485  |         |
| 358. | (0.00112) | RY*( 7) | C | 10 | s( 1.79%)  | p10.41( 18.66%) | d44.37( 79.55%) |         |         |
|      |           |         |   |    | 0.0000     | -0.0021         | -0.0687         | 0.1149  | 0.0018  |
|      |           |         |   |    | 0.0084     | 0.1210          | 0.2477          | -0.0028 | -0.0030 |



|      |           |         |   |    |            |                 |                 |         |         |
|------|-----------|---------|---|----|------------|-----------------|-----------------|---------|---------|
|      |           |         |   |    | 0.1590     | -0.0043         | 0.0603          | 0.2856  | -0.1751 |
|      |           |         |   |    | 0.5916     | -0.2258         | 0.2115          | -0.5649 |         |
| 359. | (0.00064) | RY*( 8) | C | 10 | s( 24.42%) | p 2.88( 70.24%) | d 0.22( 5.34%)  |         |         |
|      |           |         |   |    | 0.0000     | -0.0119         | 0.4638          | 0.1701  | 0.0066  |
|      |           |         |   |    | -0.0051    | -0.0473         | 0.5249          | -0.0163 | 0.1914  |
|      |           |         |   |    | 0.5024     | -0.0011         | -0.1132         | -0.3500 | 0.0309  |
|      |           |         |   |    | -0.0355    | -0.1311         | -0.1569         | 0.0966  |         |
| 360. | (0.00036) | RY*( 9) | C | 10 | s( 81.90%) | p 0.18( 14.54%) | d 0.04( 3.56%)  |         |         |
|      |           |         |   |    | 0.0000     | 0.0003          | 0.1640          | 0.8897  | -0.0212 |
|      |           |         |   |    | -0.0048    | 0.0130          | -0.2202         | -0.0138 | 0.1198  |
|      |           |         |   |    | -0.2701    | 0.0067          | 0.0809          | 0.0509  | 0.0738  |
|      |           |         |   |    | 0.0854     | -0.0921         | -0.0393         | 0.1134  |         |
| 361. | (0.00014) | RY*(10) | C | 10 | s( 3.29%)  | p 6.24( 20.51%) | d23.19( 76.20%) |         |         |
|      |           |         |   |    | 0.0000     | -0.0086         | 0.1050          | 0.1444  | -0.0301 |
|      |           |         |   |    | -0.0083    | 0.2915          | 0.0210          | 0.0075  | -0.0283 |
|      |           |         |   |    | 0.1854     | 0.0093          | 0.0000          | 0.2903  | -0.7350 |
|      |           |         |   |    | -0.3116    | 0.3456          | 0.0357          | 0.0637  |         |
| 362. | (0.00014) | RY*(11) | C | 10 | s( 1.59%)  | p12.92( 20.58%) | d48.87( 77.83%) |         |         |
|      |           |         |   |    | 0.0000     | 0.0011          | -0.0221         | 0.1068  | 0.0635  |
|      |           |         |   |    | -0.0098    | -0.0078         | -0.1703         | 0.0171  | -0.1974 |
|      |           |         |   |    | 0.3472     | 0.0052          | -0.1293         | -0.0065 | 0.1390  |
|      |           |         |   |    | -0.1868    | -0.2015         | 0.8082          | 0.1741  |         |
| 363. | (0.00008) | RY*(12) | C | 10 | s( 0.71%)  | p83.87( 59.33%) | d56.49( 39.96%) |         |         |
| 364. | (0.00004) | RY*(13) | C | 10 | s( 2.89%)  | p 1.10( 3.17%)  | d32.46( 93.93%) |         |         |
| 365. | (0.00001) | RY*(14) | C | 10 | s( 98.66%) | p 0.00( 0.10%)  | d 0.01( 1.24%)  |         |         |
| 366. | (0.00639) | RY*( 1) | N | 11 | s( 0.05%)  | p99.99( 99.23%) | d14.18( 0.72%)  |         |         |
|      |           |         |   |    | 0.0000     | 0.0020          | 0.0116          | 0.0192  | -0.0003 |
|      |           |         |   |    | 0.0029     | -0.4746         | -0.0097         | 0.0046  | -0.1187 |
|      |           |         |   |    | 0.0139     | 0.0064          | -0.8675         | -0.0003 | -0.0638 |
|      |           |         |   |    | 0.0200     | -0.0345         | -0.0343         | -0.0193 |         |
| 367. | (0.00514) | RY*( 2) | N | 11 | s( 6.11%)  | p13.83( 84.48%) | d 1.54( 9.41%)  |         |         |
|      |           |         |   |    | 0.0000     | -0.0040         | 0.2321          | -0.0848 | -0.0001 |
|      |           |         |   |    | 0.0040     | -0.4106         | 0.0238          | -0.0137 | 0.8151  |
|      |           |         |   |    | -0.0306    | -0.0029         | 0.0969          | -0.0280 | 0.1128  |
|      |           |         |   |    | -0.0712    | -0.1061         | 0.2506          | 0.0473  |         |
| 368. | (0.00167) | RY*( 3) | N | 11 | s( 1.24%)  | p69.25( 86.09%) | d10.19( 12.66%) |         |         |
|      |           |         |   |    | 0.0000     | 0.0040          | 0.1011          | -0.0469 | -0.0008 |
|      |           |         |   |    | 0.0117     | 0.7185          | 0.0952          | 0.0088  | 0.3569  |
|      |           |         |   |    | 0.0119     | -0.0063         | -0.4505         | -0.0697 | 0.2820  |
|      |           |         |   |    | 0.1370     | -0.1278         | -0.0583         | -0.0929 |         |
| 369. | (0.00107) | RY*( 4) | N | 11 | s( 86.36%) | p 0.08( 7.21%)  | d 0.07( 6.43%)  |         |         |
|      |           |         |   |    | 0.0000     | 0.0053          | 0.9231          | 0.1068  | 0.0011  |
|      |           |         |   |    | -0.0082    | -0.0201         | 0.0081          | 0.0020  | -0.2562 |
|      |           |         |   |    | -0.0446    | -0.0007         | 0.0527          | -0.0342 | 0.1426  |
|      |           |         |   |    | 0.0191     | -0.0141         | -0.1422         | 0.1523  |         |
| 370. | (0.00067) | RY*( 5) | N | 11 | s( 3.45%)  | p 0.40( 1.38%)  | d27.62( 95.18%) |         |         |
|      |           |         |   |    | 0.0000     | 0.0013          | 0.1751          | 0.0615  | 0.0017  |
|      |           |         |   |    | 0.0073     | 0.0649          | -0.0702         | 0.0048  | -0.0110 |
|      |           |         |   |    | -0.0554    | -0.0050         | -0.0327         | 0.0154  | -0.2539 |
|      |           |         |   |    | 0.4688     | 0.4783          | 0.5382          | -0.3862 |         |
| 371. | (0.00051) | RY*( 6) | N | 11 | s( 1.00%)  | p15.64( 15.59%) | d83.67( 83.41%) |         |         |
|      |           |         |   |    | 0.0000     | 0.0014          | 0.0948          | 0.0313  | 0.0004  |
|      |           |         |   |    | 0.0256     | 0.2832          | -0.1339         | 0.0109  | 0.0710  |
|      |           |         |   |    | -0.1010    | -0.0121         | -0.1677         | 0.1160  | -0.4858 |
|      |           |         |   |    | -0.5432    | 0.1749          | 0.2907          | 0.4336  |         |
| 372. | (0.00037) | RY*( 7) | N | 11 | s( 2.71%)  | p 2.71( 7.34%)  | d33.19( 89.95%) |         |         |
|      |           |         |   |    | 0.0000     | 0.0008          | 0.1101          | 0.1223  | 0.0052  |
|      |           |         |   |    | 0.0037     | 0.0575          | 0.0486          | 0.0047  | -0.0128 |
|      |           |         |   |    | -0.0505    | 0.0011          | 0.0453          | 0.2509  | -0.4966 |
|      |           |         |   |    | 0.0969     | -0.7423         | 0.0680          | -0.2963 |         |
| 373. | (0.00015) | RY*( 8) | N | 11 | s( 49.14%) | p 0.77( 37.60%) | d 0.27( 13.26%) |         |         |
|      |           |         |   |    | 0.0000     | 0.0049          | -0.1127         | 0.6919  | -0.0028 |
|      |           |         |   |    | -0.0056    | -0.0126         | -0.1574         | -0.0003 | 0.0921  |
|      |           |         |   |    | -0.1193    | -0.0038         | -0.0144         | 0.5728  | 0.2618  |
|      |           |         |   |    | 0.1513     | 0.0512          | -0.0019         | 0.1963  |         |
| 374. | (0.00014) | RY*( 9) | N | 11 | s( 1.48%)  | p18.31( 27.07%) | d48.31( 71.45%) |         |         |
|      |           |         |   |    | 0.0000     | 0.0016          | -0.0440         | 0.1133  | 0.0005  |
|      |           |         |   |    | 0.0006     | 0.0177          | -0.3315         | -0.0119 | -0.2639 |
|      |           |         |   |    | 0.1806     | 0.0035          | -0.0109         | -0.2408 | 0.4183  |
|      |           |         |   |    | -0.2177    | -0.3289         | 0.6174          | -0.0521 |         |
| 375. | (0.00010) | RY*(10) | N | 11 | s( 18.28%) | p 3.46( 63.26%) | d 1.01( 18.46%) |         |         |

|      |           |         |   |    |            |                 |                 |         |         |
|------|-----------|---------|---|----|------------|-----------------|-----------------|---------|---------|
|      |           |         |   |    | 0.0000     | 0.0008          | -0.0286         | 0.4266  | 0.0063  |
|      |           |         |   |    | 0.0036     | 0.0135          | -0.4764         | 0.0062  | 0.1842  |
|      |           |         |   |    | 0.0756     | 0.0078          | 0.0176          | -0.6045 | -0.2751 |
|      |           |         |   |    | 0.1638     | -0.0225         | -0.2775         | 0.0675  |         |
| 376. | (0.00006) | RY*(11) | N | 11 | s( 18.05%) | p 4.33( 78.17%) | d 0.21( 3.77%)  |         |         |
| 377. | (0.00004) | RY*(12) | N | 11 | s( 6.90%)  | p13.10( 90.45%) | d 0.38( 2.64%)  |         |         |
| 378. | (0.00005) | RY*(13) | N | 11 | s( 5.31%)  | p 0.42( 2.20%)  | d17.43( 92.49%) |         |         |
| 379. | (0.00000) | RY*(14) | N | 11 | s( 99.97%) | p 0.00( 0.01%)  | d 0.00( 0.02%)  |         |         |
| 380. | (0.00425) | RY*( 1) | C | 12 | s( 0.75%)  | p99.99( 82.83%) | d21.81( 16.41%) |         |         |
|      |           |         |   |    | 0.0000     | -0.0014         | 0.0844          | -0.0201 | -0.0009 |
|      |           |         |   |    | 0.0102     | 0.3445          | -0.0881         | -0.0007 | -0.1711 |
|      |           |         |   |    | 0.0231     | 0.0197          | 0.7763          | -0.2626 | -0.1020 |
|      |           |         |   |    | -0.2016    | -0.3036         | -0.1188         | 0.0827  |         |
| 381. | (0.00301) | RY*( 2) | C | 12 | s( 8.61%)  | p 9.21( 79.35%) | d 1.40( 12.04%) |         |         |
|      |           |         |   |    | 0.0000     | -0.0070         | 0.2933          | -0.0012 | 0.0059  |
|      |           |         |   |    | -0.0141    | -0.7487         | 0.0178          | -0.0068 | 0.2759  |
|      |           |         |   |    | 0.1564     | 0.0077          | 0.3601          | 0.0457  | -0.0570 |
|      |           |         |   |    | -0.1562    | -0.0217         | 0.3019          | 0.0329  |         |
| 382. | (0.00144) | RY*( 3) | C | 12 | s( 2.58%)  | p35.30( 90.91%) | d 2.53( 6.52%)  |         |         |
|      |           |         |   |    | 0.0000     | -0.0043         | 0.1457          | -0.0670 | 0.0043  |
|      |           |         |   |    | -0.0038    | 0.3350          | -0.0841         | -0.0436 | 0.8303  |
|      |           |         |   |    | 0.3053     | -0.0045         | 0.0431          | 0.0589  | 0.0983  |
|      |           |         |   |    | 0.1046     | 0.0332          | -0.2061         | -0.0315 |         |
| 383. | (0.00111) | RY*( 4) | C | 12 | s( 61.90%) | p 0.55( 34.34%) | d 0.06( 3.77%)  |         |         |
|      |           |         |   |    | 0.0000     | 0.0065          | 0.7859          | -0.0296 | -0.0187 |
|      |           |         |   |    | 0.0119     | 0.1178          | -0.3911         | 0.0034  | -0.1710 |
|      |           |         |   |    | -0.1723    | -0.0003         | -0.1785         | 0.2926  | -0.1547 |
|      |           |         |   |    | -0.0073    | -0.0859         | -0.0681         | -0.0410 |         |
| 384. | (0.00070) | RY*( 5) | C | 12 | s( 2.06%)  | p 6.20( 12.80%) | d41.23( 85.13%) |         |         |
|      |           |         |   |    | 0.0000     | 0.0025          | 0.1429          | -0.0150 | -0.0016 |
|      |           |         |   |    | -0.0020    | 0.1051          | -0.1599         | 0.0043  | -0.0883 |
|      |           |         |   |    | -0.1133    | -0.0084         | 0.2403          | -0.1138 | 0.3732  |
|      |           |         |   |    | 0.0840     | 0.7891          | 0.1454          | 0.2473  |         |
| 385. | (0.00041) | RY*( 6) | C | 12 | s( 10.61%) | p 7.96( 84.42%) | d 0.47( 4.97%)  |         |         |
|      |           |         |   |    | 0.0000     | -0.0065         | 0.3224          | 0.0415  | 0.0195  |
|      |           |         |   |    | 0.0146     | 0.0015          | 0.6849          | -0.0073 | 0.1679  |
|      |           |         |   |    | -0.5637    | -0.0054         | 0.0379          | -0.1656 | 0.0859  |
|      |           |         |   |    | 0.0339     | -0.0036         | -0.1902         | -0.0704 |         |
| 386. | (0.00027) | RY*( 7) | C | 12 | s( 16.61%) | p 4.48( 74.49%) | d 0.54( 8.89%)  |         |         |
|      |           |         |   |    | 0.0000     | 0.0145          | -0.2191         | 0.3392  | -0.0536 |
|      |           |         |   |    | -0.0025    | -0.1831         | -0.5166         | -0.0009 | 0.2777  |
|      |           |         |   |    | -0.5598    | -0.0001         | 0.0245          | -0.2313 | -0.0819 |
|      |           |         |   |    | 0.2138     | -0.1260         | -0.0922         | 0.1102  |         |
| 387. | (0.00016) | RY*( 8) | C | 12 | s( 6.84%)  | p12.59( 86.16%) | d 1.02( 6.99%)  |         |         |
|      |           |         |   |    | 0.0000     | -0.0084         | 0.2543          | -0.0294 | 0.0535  |
|      |           |         |   |    | 0.0066     | -0.0971         | -0.0665         | -0.0007 | -0.0848 |
|      |           |         |   |    | 0.3017     | -0.0035         | -0.2480         | -0.8295 | -0.0967 |
|      |           |         |   |    | 0.1594     | 0.0367          | -0.0562         | -0.1752 |         |
| 388. | (0.00011) | RY*( 9) | C | 12 | s( 2.00%)  | p 2.09( 4.19%)  | d46.81( 93.81%) |         |         |
|      |           |         |   |    | 0.0000     | -0.0026         | -0.0417         | 0.1337  | 0.0203  |
|      |           |         |   |    | -0.0066    | 0.1141          | 0.1382          | -0.0315 | 0.0921  |
|      |           |         |   |    | 0.0074     | -0.0022         | -0.0026         | 0.0123  | -0.8612 |
|      |           |         |   |    | -0.0904    | 0.3903          | 0.0259          | 0.1880  |         |
| 389. | (0.00012) | RY*(10) | C | 12 | s( 42.16%) | p 0.49( 20.71%) | d 0.88( 37.13%) |         |         |
|      |           |         |   |    | 0.0000     | -0.0024         | 0.0484          | 0.6461  | 0.0424  |
|      |           |         |   |    | 0.0067     | -0.1716         | 0.0693          | 0.0046  | -0.1812 |
|      |           |         |   |    | 0.2833     | -0.0015         | 0.1559          | 0.1880  | 0.0656  |
|      |           |         |   |    | 0.1790     | 0.1405          | -0.5373         | -0.1629 |         |
| 390. | (0.00004) | RY*(11) | C | 12 | s( 41.68%) | p 0.27( 11.31%) | d 1.13( 47.01%) |         |         |
| 391. | (0.00002) | RY*(12) | C | 12 | s( 0.53%)  | p16.63( 8.77%)  | d99.99( 90.70%) |         |         |
| 392. | (0.00002) | RY*(13) | C | 12 | s( 4.81%)  | p 1.84( 8.84%)  | d17.94( 86.34%) |         |         |
| 393. | (0.00000) | RY*(14) | C | 12 | s( 98.91%) | p 0.01( 1.00%)  | d 0.00( 0.09%)  |         |         |
| 394. | (0.00426) | RY*( 1) | C | 13 | s( 0.82%)  | p99.99( 82.67%) | d20.24( 16.52%) |         |         |
|      |           |         |   |    | 0.0000     | -0.0022         | 0.0847          | -0.0313 | -0.0021 |
|      |           |         |   |    | 0.0114     | 0.3047          | -0.1219         | -0.0043 | -0.1714 |
|      |           |         |   |    | 0.1075     | 0.0185          | 0.7912          | -0.2270 | 0.0450  |
|      |           |         |   |    | -0.2355    | -0.1246         | -0.2021         | 0.2265  |         |
| 395. | (0.00304) | RY*( 2) | C | 13 | s( 8.63%)  | p 9.22( 79.62%) | d 1.36( 11.74%) |         |         |
|      |           |         |   |    | 0.0000     | -0.0068         | 0.2937          | 0.0025  | 0.0055  |
|      |           |         |   |    | -0.0115    | -0.0976         | 0.1333          | -0.0125 | -0.8549 |
|      |           |         |   |    | -0.0477    | 0.0052          | -0.1809         | -0.0524 | 0.1863  |

|      |           |         |   |    |                                                                                                                                                                                                                                  |
|------|-----------|---------|---|----|----------------------------------------------------------------------------------------------------------------------------------------------------------------------------------------------------------------------------------|
| 396. | (0.00151) | RY*( 3) | C | 13 | 0.1266 -0.0272 -0.2415 -0.0872<br>s( 1.51%)p61.64( 92.89%)d 3.72( 5.60%)<br>0.0000 0.0046 -0.0593 0.1073 0.0022<br>0.0374 -0.8611 -0.1954 -0.0130 0.0542<br>0.1354 -0.0213 0.3198 0.1537 0.1290<br>0.0613 0.0140 -0.1874 -0.0177 |
| 397. | (0.00109) | RY*( 4) | C | 13 | s( 64.80%)p 0.48( 31.20%)d 0.06( 4.00%)<br>0.0000 0.0059 0.8046 -0.0212 -0.0130<br>0.0070 -0.0277 -0.2161 0.0092 0.2306<br>-0.4049 0.0046 -0.0108 0.2172 -0.0462<br>-0.1151 0.0802 -0.0555 0.1228                                |
| 398. | (0.00069) | RY*( 5) | C | 13 | s( 3.48%)p 3.70( 12.87%)d24.03( 83.65%)<br>0.0000 0.0009 0.1862 -0.0112 0.0038<br>0.0002 0.0745 -0.2168 0.0043 -0.0424<br>0.0689 -0.0088 0.2634 -0.0106 -0.2932<br>0.4474 -0.2445 0.2845 -0.6401                                 |
| 399. | (0.00044) | RY*( 6) | C | 13 | s( 7.15%)p12.07( 86.27%)d 0.92( 6.58%)<br>0.0000 -0.0061 0.2651 0.0286 0.0187<br>0.0010 0.1045 -0.1462 0.0156 -0.0635<br>0.8271 0.0058 -0.1455 0.3477 -0.0298<br>-0.1816 0.0779 0.1373 0.0840                                    |
| 400. | (0.00024) | RY*( 7) | C | 13 | s( 6.02%)p13.96( 84.05%)d 1.65( 9.93%)<br>0.0000 0.0103 -0.1180 0.2101 -0.0451<br>0.0004 -0.0021 -0.7847 -0.0004 -0.1599<br>-0.0475 -0.0034 -0.2410 -0.3727 -0.0787<br>0.0651 0.0577 0.1352 0.2593                               |
| 401. | (0.00015) | RY*( 8) | C | 13 | s( 11.23%)p 6.98( 78.41%)d 0.92( 10.35%)<br>0.0000 -0.0142 0.3168 -0.0812 0.0719<br>-0.0022 -0.1885 0.2451 0.0077 0.2061<br>0.2761 0.0037 -0.0678 -0.7518 -0.1082<br>0.0199 0.2877 -0.0494 -0.0788                               |
| 402. | (0.00012) | RY*( 9) | C | 13 | s( 59.57%)p 0.19( 11.56%)d 0.48( 28.88%)<br>0.0000 -0.0031 0.0108 0.7716 0.0134<br>-0.0023 -0.0517 0.2481 0.0062 -0.1545<br>-0.1044 0.0028 0.1227 0.0383 -0.3828<br>-0.2383 0.1991 0.2126 -0.0243                                |
| 403. | (0.00009) | RY*(10) | C | 13 | s( 1.30%)p 4.82( 6.29%)d70.81( 92.40%)                                                                                                                                                                                           |
| 404. | (0.00005) | RY*(11) | C | 13 | s( 30.10%)p 0.52( 15.61%)d 1.80( 54.29%)                                                                                                                                                                                         |
| 405. | (0.00002) | RY*(12) | C | 13 | s( 2.97%)p 2.55( 7.59%)d30.08( 89.44%)                                                                                                                                                                                           |
| 406. | (0.00002) | RY*(13) | C | 13 | s( 3.44%)p 2.98( 10.28%)d25.04( 86.27%)                                                                                                                                                                                          |
| 407. | (0.00000) | RY*(14) | C | 13 | s( 99.03%)p 0.01( 0.81%)d 0.00( 0.16%)                                                                                                                                                                                           |
| 408. | (0.00292) | RY*( 1) | B | 14 | s( 9.96%)p 8.81( 87.77%)d 0.23( 2.27%)<br>0.0000 0.0098 0.3144 0.0072 0.0252<br>0.0117 -0.8196 -0.2924 0.0085 -0.3067<br>-0.1500 -0.0023 -0.0586 0.0158 -0.0056<br>0.1186 0.0611 0.0609 -0.0343                                  |
| 409. | (0.00140) | RY*( 2) | B | 14 | s( 3.39%)p20.72( 70.23%)d 7.79( 26.39%)<br>0.0000 -0.0024 0.1594 0.0751 -0.0533<br>-0.0036 0.2298 -0.1893 -0.0042 -0.2324<br>0.1146 0.0056 0.6056 -0.4238 0.0581<br>0.2952 0.2519 0.2168 -0.2508                                 |
| 410. | (0.00130) | RY*( 3) | B | 14 | s( 1.47%)p65.49( 96.10%)d 1.66( 2.43%)<br>0.0000 0.0009 0.0815 0.0896 0.0020<br>-0.0057 0.3424 -0.1709 0.0104 -0.7053<br>0.2972 0.0044 -0.4441 0.1773 -0.0360<br>-0.0552 0.0664 0.1198 0.0351                                    |
| 411. | (0.00095) | RY*( 4) | B | 14 | s( 64.43%)p 0.46( 29.93%)d 0.09( 5.65%)<br>0.0000 -0.0128 0.7969 0.0939 -0.0178<br>0.0037 0.1725 0.1029 -0.0009 0.3951<br>0.0761 0.0066 -0.3114 0.0028 0.0014<br>0.1794 0.1033 0.0732 -0.0907                                    |
| 412. | (0.00063) | RY*( 5) | B | 14 | s( 5.85%)p15.55( 90.94%)d 0.55( 3.21%)<br>0.0000 -0.0182 -0.0312 0.2361 -0.0381<br>-0.0174 -0.2875 0.7554 -0.0008 -0.1522<br>0.4514 -0.0076 0.1196 0.1204 0.0665<br>0.0856 0.0631 0.0528 -0.1166                                 |
| 413. | (0.00045) | RY*( 6) | B | 14 | s( 36.37%)p 0.88( 31.99%)d 0.87( 31.64%)<br>0.0000 -0.0022 -0.3156 0.5126 -0.0366<br>-0.0061 0.0155 -0.2199 0.0044 0.2010<br>-0.1462 -0.0036 -0.0928 0.4482 0.0468<br>0.3068 0.3342 0.0762 -0.3202                               |

414. (0.00038) RY\*( 7) B 14 s( 20.53%)p 3.72( 76.42%)d 0.15( 3.05%)  
0.0000 -0.0027 -0.2201 0.3942 -0.0384  
0.0027 -0.1025 0.0297 -0.0098 0.0587  
-0.0211 0.0003 -0.4471 -0.7409 0.0119  
-0.1124 0.0038 0.0176 -0.1320

415. (0.00037) RY\*( 8) B 14 s( 1.63%)p53.16( 86.80%)d 7.09( 11.57%)  
0.0000 -0.0012 0.0882 0.0755 -0.0534  
0.0130 0.1451 0.4278 -0.0245 -0.2733  
-0.7668 -0.0108 0.0046 0.0161 -0.1667  
-0.0146 0.0260 0.2947 0.0116

416. (0.00019) RY\*( 9) B 14 s( 52.64%)p 0.21( 11.26%)d 0.69( 36.10%)  
0.0000 0.0063 0.2217 0.6811 -0.1154  
-0.0107 0.0519 -0.1195 -0.0034 -0.0587  
-0.0420 0.0097 0.2915 0.0722 0.1112  
-0.2050 -0.3568 -0.2155 0.3645

417. (0.00013) RY\*(10) B 14 s( 1.36%)p 8.43( 11.46%)d64.11( 87.18%)  
0.0000 -0.0006 -0.0604 0.0889 -0.0451  
0.0131 -0.0760 -0.1306 -0.0200 0.1845  
0.2228 -0.0036 0.0653 0.0569 -0.5866  
-0.0932 -0.3128 0.6487 0.0202

418. (0.00009) RY\*(11) B 14 s( 16.70%)p 0.17( 2.83%)d 4.82( 80.47%)

419. (0.00007) RY\*(12) B 14 s( 58.94%)p 0.02( 1.26%)d 0.68( 39.80%)

420. (0.00004) RY\*(13) B 14 s( 25.43%)p 0.03( 0.65%)d 2.91( 73.92%)

421. (0.00004) RY\*(14) B 14 s( 1.39%)p 1.86( 2.57%)d69.33( 96.04%)

422. (0.00328) RY\*( 1) B 15 s( 40.38%)p 1.22( 49.18%)d 0.26( 10.44%)  
0.0000 0.0063 0.6343 0.0314 0.0209  
0.0056 0.5981 0.1782 0.0026 0.2376  
0.1433 -0.0032 -0.0672 -0.1444 0.0649  
-0.2918 -0.1135 -0.0400 0.0226

423. (0.00182) RY\*( 2) B 15 s( 4.47%)p17.82( 79.64%)d 3.56( 15.89%)  
0.0000 -0.0241 0.1756 0.1065 -0.0439  
0.0019 0.0293 -0.5263 0.0055 -0.1107  
-0.3854 -0.0188 0.5030 0.3231 0.0759  
-0.3732 -0.0717 -0.0856 -0.0378

424. (0.00127) RY\*( 3) B 15 s( 0.33%)p99.99( 96.16%)d10.50( 3.51%)  
0.0000 0.0008 0.0266 0.0501 -0.0109  
0.0084 -0.3324 -0.0349 -0.0065 0.8399  
-0.2839 -0.0144 -0.2275 0.1087 0.0163  
-0.1253 0.0335 0.0738 -0.1119

425. (0.00122) RY\*( 4) B 15 s( 4.05%)p23.00( 93.13%)d 0.70( 2.82%)  
0.0000 0.0019 0.1903 -0.0637 0.0142  
-0.0069 0.0046 -0.0150 0.0166 -0.3105  
-0.0693 -0.0149 -0.6540 0.6337 0.0551  
-0.0537 0.0450 -0.0282 -0.1396

426. (0.00116) RY\*( 5) B 15 s( 30.44%)p 2.25( 68.49%)d 0.04( 1.07%)  
0.0000 -0.0146 0.5434 0.0851 -0.0411  
-0.0055 -0.6062 -0.2168 -0.0045 -0.2371  
0.1078 0.0165 -0.1548 -0.4223 0.0415  
-0.0732 -0.0209 0.0556 0.0073

427. (0.00070) RY\*( 6) B 15 s( 21.47%)p 3.51( 75.48%)d 0.14( 3.05%)  
0.0000 0.0042 0.3546 -0.2927 0.0575  
-0.0046 -0.3091 0.5999 -0.0144 -0.0195  
-0.0851 -0.0052 0.4305 0.3258 -0.0770  
0.1534 -0.0314 -0.0029 -0.0036

428. (0.00037) RY\*( 7) B 15 s( 9.45%)p 2.23( 21.11%)d 7.35( 69.44%)  
0.0000 0.0045 0.2969 0.0794 -0.0033  
0.0081 0.1903 -0.2524 -0.0109 0.0812  
-0.3211 -0.0054 -0.0149 -0.0323 0.0147  
0.8066 0.1078 -0.1658 0.0664

429. (0.00028) RY\*( 8) B 15 s( 12.94%)p 2.01( 25.96%)d 4.72( 61.10%)  
0.0000 0.0067 0.1224 0.3329 -0.0591  
-0.0081 -0.0004 -0.1255 0.0237 0.0939  
0.3616 0.0081 0.1040 0.3046 -0.3438  
0.0558 0.3439 0.4670 0.3916

430. (0.00024) RY\*( 9) B 15 s( 74.84%)p 0.24( 17.71%)d 0.10( 7.45%)  
0.0000 0.0009 -0.0442 0.8590 -0.0927  
0.0127 -0.0674 0.3822 -0.0069 -0.0977  
-0.1227 0.0026 0.0212 0.0349 0.1735  
0.0018 -0.0536 -0.1867 -0.0816

431. (0.00017) RY\*(10) B 15 s( 0.98%)p66.88( 65.45%)d34.30( 33.57%)  
0.0000 0.0001 -0.0237 -0.0396 0.0875

|      |           |         |   |    |            |                 |                 |         |         |
|------|-----------|---------|---|----|------------|-----------------|-----------------|---------|---------|
|      |           |         |   |    | 0.0007     | 0.0986          | 0.2255          | -0.0002 | -0.2033 |
|      |           |         |   |    | -0.6809    | 0.0028          | -0.1533         | -0.2558 | -0.1782 |
|      |           |         |   |    | -0.1948    | 0.2331          | 0.3130          | 0.3372  |         |
| 432. | (0.00009) | RY*(11) | B | 15 | s( 24.56%) | p 0.14( 3.34%)  | d 2.94( 72.10%) |         |         |
| 433. | (0.00006) | RY*(12) | B | 15 | s( 66.86%) | p 0.02( 1.52%)  | d 0.47( 31.62%) |         |         |
| 434. | (0.00005) | RY*(13) | B | 15 | s( 7.62%)  | p 0.14( 1.05%)  | d11.99( 91.34%) |         |         |
| 435. | (0.00003) | RY*(14) | B | 15 | s( 1.73%)  | p 1.07( 1.86%)  | d55.85( 96.42%) |         |         |
| 436. | (0.00549) | RY*( 1) | C | 16 | s( 2.24%)  | p41.31( 92.37%) | d 2.41( 5.39%)  |         |         |
|      |           |         |   |    | 0.0000     | 0.0206          | 0.0790          | 0.1247  | 0.0121  |
|      |           |         |   |    | 0.0222     | 0.6832          | -0.0792         | 0.0080  | 0.6009  |
|      |           |         |   |    | -0.1050    | -0.0211         | -0.2772         | 0.0288  | -0.1876 |
|      |           |         |   |    | 0.1151     | -0.0123         | 0.0074          | 0.0724  |         |
| 437. | (0.00277) | RY*( 2) | C | 16 | s( 28.97%) | p 1.78( 51.67%) | d 0.67( 19.36%) |         |         |
|      |           |         |   |    | 0.0000     | -0.0087         | 0.5181          | -0.1454 | 0.0080  |
|      |           |         |   |    | 0.0071     | -0.1147         | 0.3833          | -0.0112 | 0.3265  |
|      |           |         |   |    | -0.1112    | -0.0387         | 0.4850          | 0.0280  | -0.2426 |
|      |           |         |   |    | -0.3335    | -0.1455         | 0.0433          | 0.0227  |         |
| 438. | (0.00260) | RY*( 3) | C | 16 | s( 13.29%) | p 5.31( 70.55%) | d 1.22( 16.16%) |         |         |
|      |           |         |   |    | 0.0000     | -0.0023         | 0.3522          | -0.0938 | 0.0050  |
|      |           |         |   |    | -0.0149    | 0.4285          | 0.4083          | 0.0437  | -0.4829 |
|      |           |         |   |    | 0.0378     | -0.0074         | -0.0694         | 0.3372  | 0.2339  |
|      |           |         |   |    | 0.1710     | -0.0062         | -0.1996         | 0.1944  |         |
| 439. | (0.00186) | RY*( 4) | C | 16 | s( 28.13%) | p 2.48( 69.86%) | d 0.07( 2.00%)  |         |         |
|      |           |         |   |    | 0.0000     | -0.0024         | 0.5083          | -0.1513 | -0.0073 |
|      |           |         |   |    | 0.0309     | -0.3442         | -0.0135         | 0.0079  | 0.1344  |
|      |           |         |   |    | 0.3091     | 0.0151          | -0.6541         | -0.1931 | 0.0472  |
|      |           |         |   |    | -0.0167    | -0.0372         | -0.1270         | -0.0041 |         |
| 440. | (0.00133) | RY*( 5) | C | 16 | s( 6.41%)  | p 7.59( 48.62%) | d 7.02( 44.98%) |         |         |
|      |           |         |   |    | 0.0000     | -0.0015         | 0.2388          | -0.0833 | -0.0088 |
|      |           |         |   |    | 0.0111     | 0.3627          | -0.2105         | -0.0015 | -0.3063 |
|      |           |         |   |    | 0.3580     | -0.0018         | 0.1418          | -0.2609 | -0.2453 |
|      |           |         |   |    | -0.0837    | 0.1305          | 0.2109          | -0.5666 |         |
| 441. | (0.00128) | RY*( 6) | C | 16 | s( 4.51%)  | p 7.19( 32.45%) | d13.98( 63.04%) |         |         |
|      |           |         |   |    | 0.0000     | -0.0011         | 0.1908          | -0.0927 | -0.0097 |
|      |           |         |   |    | 0.0092     | 0.0676          | -0.1348         | 0.0050  | 0.1238  |
|      |           |         |   |    | 0.1387     | 0.0138          | 0.2999          | -0.4206 | 0.4406  |
|      |           |         |   |    | 0.2437     | 0.3141          | 0.2996          | 0.4342  |         |
| 442. | (0.00081) | RY*( 7) | C | 16 | s( 16.87%) | p 3.25( 54.78%) | d 1.68( 28.34%) |         |         |
|      |           |         |   |    | 0.0000     | -0.0106         | 0.3825          | 0.1488  | -0.0136 |
|      |           |         |   |    | 0.0074     | -0.0883         | -0.3068         | 0.0090  | -0.0527 |
|      |           |         |   |    | -0.6562    | 0.0000          | 0.0750          | -0.0823 | 0.1551  |
|      |           |         |   |    | 0.2512     | 0.1229          | -0.2864         | -0.3149 |         |
| 443. | (0.00077) | RY*( 8) | C | 16 | s( 18.69%) | p 2.63( 49.13%) | d 1.72( 32.18%) |         |         |
|      |           |         |   |    | 0.0000     | -0.0083         | 0.2866          | 0.3234  | -0.0086 |
|      |           |         |   |    | 0.0061     | -0.0512         | -0.5113         | -0.0014 | -0.1637 |
|      |           |         |   |    | 0.0226     | -0.0078         | -0.0286         | 0.4461  | -0.1261 |
|      |           |         |   |    | -0.3293    | 0.0969          | 0.2635          | 0.3445  |         |
| 444. | (0.00044) | RY*( 9) | C | 16 | s( 73.93%) | p 0.28( 20.42%) | d 0.08( 5.65%)  |         |         |
|      |           |         |   |    | 0.0000     | 0.0027          | 0.0413          | 0.8588  | -0.0035 |
|      |           |         |   |    | 0.0013     | -0.0086         | 0.2912          | 0.0078  | -0.0163 |
|      |           |         |   |    | 0.2020     | -0.0017         | 0.0475          | -0.2755 | 0.0704  |
|      |           |         |   |    | -0.1107    | 0.0536          | -0.1900         | -0.0198 |         |
| 445. | (0.00019) | RY*(10) | C | 16 | s( 1.13%)  | p28.00( 31.76%) | d59.16( 67.11%) |         |         |
|      |           |         |   |    | 0.0000     | 0.0018          | 0.0084          | 0.1010  | -0.0326 |
|      |           |         |   |    | 0.0189     | -0.1367         | 0.3567          | -0.0079 | 0.1467  |
|      |           |         |   |    | -0.1078    | 0.0148          | -0.1862         | 0.3213  | 0.1813  |
|      |           |         |   |    | 0.0812     | 0.4460          | 0.5544          | -0.3539 |         |
| 446. | (0.00013) | RY*(11) | C | 16 | s( 4.92%)  | p 1.83( 9.01%)  | d17.49( 86.07%) |         |         |
|      |           |         |   |    | 0.0000     | -0.0084         | 0.1128          | 0.1625  | -0.1001 |
|      |           |         |   |    | 0.0072     | -0.2070         | 0.0276          | 0.0038  | -0.0388 |
|      |           |         |   |    | 0.1456     | 0.0038          | 0.1156          | 0.1016  | -0.4632 |
|      |           |         |   |    | 0.7515     | -0.2086         | 0.1753          | 0.0844  |         |
| 447. | (0.00008) | RY*(12) | C | 16 | s( 0.04%)  | p99.99( 68.09%) | d99.99( 31.87%) |         |         |
| 448. | (0.00004) | RY*(13) | C | 16 | s( 2.30%)  | p 0.67( 1.54%)  | d41.90( 96.16%) |         |         |
| 449. | (0.00001) | RY*(14) | C | 16 | s( 98.53%) | p 0.00( 0.12%)  | d 0.01( 1.35%)  |         |         |
| 450. | (0.00554) | RY*( 1) | N | 17 | s( 5.76%)  | p14.80( 85.26%) | d 1.56( 8.99%)  |         |         |
|      |           |         |   |    | 0.0000     | -0.0042         | 0.2247          | -0.0841 | -0.0004 |
|      |           |         |   |    | -0.0062    | 0.4138          | -0.0290         | 0.0095  | -0.3984 |
|      |           |         |   |    | -0.0005    | -0.0147         | 0.7220          | -0.0106 | 0.1665  |
|      |           |         |   |    | -0.1190    | 0.1390          | 0.1242          | -0.1150 |         |
| 451. | (0.00483) | RY*( 2) | N | 17 | s( 0.38%)  | p99.99( 98.01%) | d 4.22( 1.61%)  |         |         |

|      |           |         |      |            |                 |                 |         |         |
|------|-----------|---------|------|------------|-----------------|-----------------|---------|---------|
|      |           |         |      | 0.0000     | 0.0007          | 0.0615          | -0.0057 | -0.0003 |
|      |           |         |      | -0.0034    | 0.3447          | 0.0120          | 0.0048  | -0.6943 |
|      |           |         |      | 0.0020     | 0.0070          | -0.6156         | -0.0007 | -0.0384 |
|      |           |         |      | -0.0193    | 0.0242          | -0.0113         | -0.1163 |         |
| 452. | (0.00166) | RY*( 3) | N 17 | s( 0.27%)  | p99.99( 92.92%) | d25.30( 6.81%)  |         |         |
|      |           |         |      | 0.0000     | 0.0044          | 0.0414          | -0.0309 | -0.0003 |
|      |           |         |      | -0.0140    | -0.7997         | -0.1335         | -0.0100 | -0.5050 |
|      |           |         |      | -0.0366    | 0.0041          | 0.1223          | -0.0120 | 0.1209  |
|      |           |         |      | -0.2048    | -0.0534         | -0.0933         | -0.0011 |         |
| 453. | (0.00121) | RY*( 4) | N 17 | s( 90.75%) | p 0.06( 5.46%)  | d 0.04( 3.79%)  |         |         |
|      |           |         |      | 0.0000     | 0.0060          | 0.9475          | 0.0985  | 0.0013  |
|      |           |         |      | 0.0068     | -0.0454         | -0.0395         | -0.0072 | 0.1698  |
|      |           |         |      | 0.0100     | 0.0025          | -0.1431         | -0.0378 | 0.0345  |
|      |           |         |      | -0.0460    | 0.0258          | -0.1430         | 0.1162  |         |
| 454. | (0.00075) | RY*( 5) | N 17 | s( 0.64%)  | p 2.23( 1.43%)  | d99.99( 97.92%) |         |         |
|      |           |         |      | 0.0000     | 0.0004          | 0.0753          | 0.0277  | 0.0006  |
|      |           |         |      | -0.0074    | -0.0522         | 0.0559          | 0.0000  | -0.0143 |
|      |           |         |      | -0.0380    | 0.0058          | 0.0000          | -0.0821 | -0.6058 |
|      |           |         |      | -0.4131    | -0.0424         | 0.6403          | 0.1728  |         |
| 455. | (0.00065) | RY*( 6) | N 17 | s( 1.23%)  | p 9.24( 11.34%) | d71.23( 87.43%) |         |         |
|      |           |         |      | 0.0000     | 0.0014          | 0.1095          | 0.0164  | 0.0015  |
|      |           |         |      | -0.0253    | -0.2309         | 0.1759          | -0.0174 | -0.0979 |
|      |           |         |      | 0.1357     | 0.0027          | 0.0041          | -0.0131 | -0.0408 |
|      |           |         |      | 0.6979     | 0.4447          | 0.4229          | -0.0951 |         |
| 456. | (0.00032) | RY*( 7) | N 17 | s( 0.90%)  | p 1.94( 1.74%)  | d99.99( 97.37%) |         |         |
|      |           |         |      | 0.0000     | 0.0000          | 0.0738          | 0.0591  | 0.0045  |
|      |           |         |      | -0.0056    | -0.0693         | -0.0101         | 0.0039  | 0.0801  |
|      |           |         |      | -0.0116    | 0.0101          | 0.0704          | -0.0282 | -0.4384 |
|      |           |         |      | -0.0176    | -0.0240         | -0.2153         | -0.8569 |         |
| 457. | (0.00014) | RY*( 8) | N 17 | s( 0.15%)  | p73.97( 11.19%) | d99.99( 88.66%) |         |         |
|      |           |         |      | 0.0000     | -0.0009         | 0.0040          | 0.0377  | 0.0087  |
|      |           |         |      | 0.0019     | 0.0512          | -0.0452         | -0.0092 | -0.2222 |
|      |           |         |      | 0.0658     | 0.0082          | 0.2272          | 0.0414  | -0.5944 |
|      |           |         |      | 0.3875     | -0.2009         | -0.4243         | 0.4035  |         |
| 458. | (0.00014) | RY*( 9) | N 17 | s( 62.68%) | p 0.45( 27.96%) | d 0.15( 9.36%)  |         |         |
|      |           |         |      | 0.0000     | 0.0055          | -0.0896         | 0.7866  | -0.0033 |
|      |           |         |      | 0.0029     | -0.0075         | 0.3874          | 0.0006  | -0.0603 |
|      |           |         |      | 0.3465     | -0.0022         | 0.0604          | 0.0459  | 0.0384  |
|      |           |         |      | -0.2047    | 0.1763          | -0.1298         | 0.0479  |         |
| 459. | (0.00010) | RY*(10) | N 17 | s( 0.46%)  | p99.99( 97.69%) | d 4.05( 1.86%)  |         |         |
| 460. | (0.00005) | RY*(11) | N 17 | s( 26.19%) | p 2.68( 70.23%) | d 0.14( 3.58%)  |         |         |
| 461. | (0.00005) | RY*(12) | N 17 | s( 5.75%)  | p 0.54( 3.13%)  | d15.85( 91.12%) |         |         |
| 462. | (0.00004) | RY*(13) | N 17 | s( 4.96%)  | p18.89( 93.78%) | d 0.25( 1.26%)  |         |         |
| 463. | (0.00000) | RY*(14) | N 17 | s( 99.92%) | p 0.00( 0.01%)  | d 0.00( 0.07%)  |         |         |
| 464. | (0.00366) | RY*( 1) | C 18 | s( 0.01%)  | p 1.00( 84.57%) | d 0.18( 15.42%) |         |         |
|      |           |         |      | 0.0000     | 0.0010          | 0.0053          | 0.0059  | 0.0019  |
|      |           |         |      | 0.0051     | 0.2317          | -0.0148         | -0.0128 | -0.6379 |
|      |           |         |      | 0.1981     | -0.0141         | -0.5460         | 0.2174  | -0.0851 |
|      |           |         |      | -0.1770    | -0.0165         | 0.2239          | 0.2554  |         |
| 465. | (0.00314) | RY*( 2) | C 18 | s( 9.39%)  | p 8.44( 79.29%) | d 1.21( 11.32%) |         |         |
|      |           |         |      | 0.0000     | -0.0063         | 0.3062          | -0.0101 | 0.0060  |
|      |           |         |      | 0.0163     | 0.8138          | -0.0156         | 0.0108  | 0.0021  |
|      |           |         |      | -0.1062    | -0.0030         | 0.3290          | 0.1021  | 0.0868  |
|      |           |         |      | 0.0472     | 0.1541          | 0.2266          | -0.1683 |         |
| 466. | (0.00146) | RY*( 3) | C 18 | s( 1.03%)  | p89.42( 91.82%) | d 6.97( 7.15%)  |         |         |
|      |           |         |      | 0.0000     | 0.0032          | -0.0482         | 0.0890  | -0.0029 |
|      |           |         |      | 0.0022     | 0.2158          | -0.1212         | -0.0299 | 0.6062  |
|      |           |         |      | 0.1893     | 0.0324          | -0.6402         | -0.2045 | 0.0301  |
|      |           |         |      | 0.0459     | 0.1327          | 0.1790          | -0.1373 |         |
| 467. | (0.00107) | RY*( 4) | C 18 | s( 63.84%) | p 0.50( 31.93%) | d 0.07( 4.23%)  |         |         |
|      |           |         |      | 0.0000     | 0.0057          | 0.7978          | -0.0390 | -0.0185 |
|      |           |         |      | -0.0119    | -0.1923         | 0.4223          | -0.0008 | 0.0288  |
|      |           |         |      | 0.3025     | 0.0027          | -0.1069         | 0.0089  | -0.1059 |
|      |           |         |      | 0.0966     | -0.0458         | -0.0923         | -0.1054 |         |
| 468. | (0.00069) | RY*( 5) | C 18 | s( 2.97%)  | p 3.82( 11.36%) | d28.82( 85.67%) |         |         |
|      |           |         |      | 0.0000     | 0.0010          | 0.1719          | -0.0125 | 0.0004  |
|      |           |         |      | -0.0014    | -0.0730         | 0.0507          | -0.0082 | 0.2036  |
|      |           |         |      | -0.0309    | -0.0052         | 0.1503          | -0.2015 | 0.2202  |
|      |           |         |      | -0.0511    | 0.0871          | 0.3626          | 0.8164  |         |
| 469. | (0.00044) | RY*( 6) | C 18 | s( 9.86%)  | p 8.40( 82.83%) | d 0.74( 7.31%)  |         |         |
|      |           |         |      | 0.0000     | -0.0084         | 0.3119          | 0.0281  | 0.0215  |

|      |           |         |   |    |            |                 |                 |         |         |
|------|-----------|---------|---|----|------------|-----------------|-----------------|---------|---------|
|      |           |         |   |    | -0.0170    | -0.0041         | -0.7933         | 0.0016  | -0.1190 |
|      |           |         |   |    | 0.2810     | -0.0054         | 0.1002          | -0.3090 | 0.0038  |
|      |           |         |   |    | -0.0380    | -0.2055         | -0.1699         | 0.0232  |         |
| 470. | (0.00024) | RY*( 7) | C | 18 | s( 11.08%) | p 7.16( 79.35%) | d 0.86( 9.57%)  |         |         |
|      |           |         |   |    | 0.0000     | 0.0155          | -0.2130         | 0.2496  | -0.0542 |
|      |           |         |   |    | 0.0027     | 0.2275          | 0.3480          | 0.0004  | -0.2093 |
|      |           |         |   |    | 0.2619     | -0.0015         | 0.1156          | -0.7035 | -0.1597 |
|      |           |         |   |    | -0.0609    | 0.1393          | -0.2142         | 0.0342  |         |
| 471. | (0.00016) | RY*( 8) | C | 18 | s( 7.15%)  | p11.97( 85.60%) | d 1.01( 7.25%)  |         |         |
|      |           |         |   |    | 0.0000     | -0.0084         | 0.2541          | 0.0611  | 0.0562  |
|      |           |         |   |    | -0.0067    | 0.0066          | -0.0197         | -0.0004 | -0.1038 |
|      |           |         |   |    | -0.8032    | -0.0015         | -0.2698         | -0.3560 | -0.2204 |
|      |           |         |   |    | -0.0224    | -0.1521         | -0.0088         | -0.0153 |         |
| 472. | (0.00011) | RY*( 9) | C | 18 | s( 0.38%)  | p12.63( 4.79%)  | d99.99( 94.83%) |         |         |
|      |           |         |   |    | 0.0000     | 0.0016          | 0.0531          | -0.0213 | -0.0229 |
|      |           |         |   |    | -0.0023    | 0.1028          | 0.1476          | -0.0223 | 0.0772  |
|      |           |         |   |    | -0.0499    | 0.0233          | -0.0772         | -0.0123 | 0.5707  |
|      |           |         |   |    | -0.6843    | -0.2700         | -0.2775         | -0.0662 |         |
| 473. | (0.00009) | RY*(10) | C | 18 | s( 33.08%) | p 0.64( 21.23%) | d 1.38( 45.69%) |         |         |
| 474. | (0.00002) | RY*(11) | C | 18 | s( 16.47%) | p 0.56( 9.27%)  | d 4.51( 74.26%) |         |         |
| 475. | (0.00003) | RY*(12) | C | 18 | s( 8.89%)  | p 0.92( 8.18%)  | d 9.33( 82.93%) |         |         |
| 476. | (0.00003) | RY*(13) | C | 18 | s( 36.93%) | p 0.24( 9.01%)  | d 1.46( 54.06%) |         |         |
| 477. | (0.00000) | RY*(14) | C | 18 | s( 98.98%) | p 0.01( 0.90%)  | d 0.00( 0.12%)  |         |         |
| 478. | (0.00371) | RY*( 1) | C | 19 | s( 0.52%)  | p99.99( 84.10%) | d29.63( 15.38%) |         |         |
|      |           |         |   |    | 0.0000     | -0.0036         | 0.0688          | -0.0208 | -0.0020 |
|      |           |         |   |    | -0.0033    | -0.1957         | 0.0562          | 0.0164  | 0.7217  |
|      |           |         |   |    | -0.2397    | 0.0120          | 0.4546          | -0.1191 | 0.2271  |
|      |           |         |   |    | 0.2092     | 0.0267          | -0.2370         | -0.0393 |         |
| 479. | (0.00308) | RY*( 2) | C | 19 | s( 9.42%)  | p 8.41( 79.20%) | d 1.21( 11.38%) |         |         |
|      |           |         |   |    | 0.0000     | -0.0068         | 0.3067          | -0.0089 | 0.0047  |
|      |           |         |   |    | 0.0116     | -0.0629         | -0.1432         | 0.0105  | 0.4473  |
|      |           |         |   |    | 0.0128     | -0.0098         | -0.7530         | 0.0009  | -0.0002 |
|      |           |         |   |    | -0.1698    | -0.1971         | -0.1794         | 0.1181  |         |
| 480. | (0.00145) | RY*( 3) | C | 19 | s( 1.34%)  | p68.68( 92.07%) | d 4.91( 6.59%)  |         |         |
|      |           |         |   |    | 0.0000     | 0.0030          | -0.0758         | 0.0874  | -0.0022 |
|      |           |         |   |    | -0.0422    | 0.8875          | 0.2465          | -0.0024 | 0.1726  |
|      |           |         |   |    | -0.0824    | -0.0134         | 0.0595          | 0.1735  | 0.0044  |
|      |           |         |   |    | -0.0879    | -0.1294         | -0.1739         | 0.1054  |         |
| 481. | (0.00096) | RY*( 4) | C | 19 | s( 70.69%) | p 0.39( 27.47%) | d 0.03( 1.83%)  |         |         |
|      |           |         |   |    | 0.0000     | 0.0054          | 0.8405          | -0.0154 | -0.0148 |
|      |           |         |   |    | -0.0059    | 0.0741          | 0.2844          | -0.0078 | -0.1017 |
|      |           |         |   |    | 0.3524     | 0.0093          | 0.1974          | -0.1213 | -0.0846 |
|      |           |         |   |    | 0.0987     | -0.0104         | 0.0328          | -0.0158 |         |
| 482. | (0.00064) | RY*( 5) | C | 19 | s( 0.32%)  | p48.50( 15.76%) | d99.99( 83.91%) |         |         |
|      |           |         |   |    | 0.0000     | -0.0030         | 0.0437          | -0.0360 | 0.0061  |
|      |           |         |   |    | 0.0024     | -0.1039         | 0.1408          | -0.0086 | 0.1847  |
|      |           |         |   |    | -0.2341    | -0.0024         | 0.1465          | 0.1285  | -0.5844 |
|      |           |         |   |    | -0.4759    | -0.1994         | 0.2184          | -0.4286 |         |
| 483. | (0.00048) | RY*( 6) | C | 19 | s( 6.07%)  | p13.32( 80.82%) | d 2.16( 13.11%) |         |         |
|      |           |         |   |    | 0.0000     | -0.0093         | 0.2422          | -0.0411 | 0.0157  |
|      |           |         |   |    | 0.0016     | -0.1299         | 0.2840          | -0.0080 | -0.1340 |
|      |           |         |   |    | -0.5294    | 0.0149          | -0.1344         | 0.6278  | 0.2321  |
|      |           |         |   |    | 0.1662     | 0.1228          | 0.1763          | 0.0588  |         |
| 484. | (0.00025) | RY*( 7) | C | 19 | s( 10.53%) | p 7.78( 81.89%) | d 0.72( 7.58%)  |         |         |
|      |           |         |   |    | 0.0000     | -0.0150         | 0.2544          | -0.1905 | 0.0635  |
|      |           |         |   |    | -0.0033    | 0.1689          | -0.7940         | -0.0019 | -0.0587 |
|      |           |         |   |    | -0.0481    | 0.0034          | 0.2593          | 0.2950  | 0.1048  |
|      |           |         |   |    | -0.0288    | -0.2429         | 0.0390          | -0.0589 |         |
| 485. | (0.00014) | RY*( 8) | C | 19 | s( 3.55%)  | p26.13( 92.79%) | d 1.03( 3.65%)  |         |         |
|      |           |         |   |    | 0.0000     | -0.0074         | 0.1819          | -0.0342 | 0.0347  |
|      |           |         |   |    | 0.0014     | 0.1646          | -0.1093         | -0.0031 | -0.2057 |
|      |           |         |   |    | -0.6689    | 0.0009          | -0.0697         | -0.6279 | -0.1007 |
|      |           |         |   |    | 0.0860     | -0.0221         | 0.0849          | 0.1063  |         |
| 486. | (0.00011) | RY*( 9) | C | 19 | s( 8.78%)  | p 0.65( 5.72%)  | d 9.73( 85.49%) |         |         |
|      |           |         |   |    | 0.0000     | -0.0044         | -0.0437         | 0.2902  | 0.0411  |
|      |           |         |   |    | 0.0288     | -0.0968         | -0.0875         | 0.0028  | 0.0243  |
|      |           |         |   |    | -0.0154    | 0.0094          | 0.0435          | 0.1912  | -0.6254 |
|      |           |         |   |    | 0.5200     | -0.2088         | -0.1262         | 0.3659  |         |
| 487. | (0.00010) | RY*(10) | C | 19 | s( 42.48%) | p 0.29( 12.31%) | d 1.06( 45.21%) |         |         |
| 488. | (0.00005) | RY*(11) | C | 19 | s( 35.64%) | p 0.36( 12.78%) | d 1.45( 51.59%) |         |         |
| 489. | (0.00002) | RY*(12) | C | 19 | s( 11.04%) | p 0.67( 7.42%)  | d 7.39( 81.54%) |         |         |

|      |           |         |   |    |                                                                                                                                                                                                    |
|------|-----------|---------|---|----|----------------------------------------------------------------------------------------------------------------------------------------------------------------------------------------------------|
| 490. | (0.00003) | RY*(13) | C | 19 | s( 0.43%)p16.77( 7.17%)d99.99( 92.40%)                                                                                                                                                             |
| 491. | (0.00000) | RY*(14) | C | 19 | s( 99.25%)p 0.01( 0.62%)d 0.00( 0.13%)                                                                                                                                                             |
| 492. | (0.00571) | RY*( 1) | N | 20 | s( 5.93%)p14.59( 86.49%)d 1.28( 7.59%)<br>0.0000 -0.0043 0.2302 -0.0791 -0.0006<br>0.0165 -0.7529 0.0031 -0.0061 0.4907<br>-0.0197 0.0045 -0.2369 0.0209 0.0994<br>-0.2150 -0.0624 -0.1245 -0.0193 |
| 493. | (0.00498) | RY*( 2) | N | 20 | s( 1.16%)p82.40( 95.77%)d 2.64( 3.06%)<br>0.0000 -0.0005 0.1042 -0.0276 0.0002<br>-0.0004 -0.0128 -0.0048 0.0064 -0.5359<br>-0.0072 0.0123 -0.8185 0.0113 0.1191<br>-0.0637 0.0110 -0.0767 0.0799  |
| 494. | (0.00169) | RY*( 3) | N | 20 | s( 2.89%)p29.88( 86.33%)d 3.73( 10.78%)<br>0.0000 0.0039 0.1679 -0.0261 -0.0014<br>-0.0111 -0.4772 -0.0237 -0.0110 -0.6387<br>-0.1102 0.0047 0.4546 0.0892 0.1503<br>-0.1268 0.1482 0.1504 -0.1568 |
| 495. | (0.00108) | RY*( 4) | N | 20 | s( 84.86%)p 0.12( 10.35%)d 0.06( 4.79%)<br>0.0000 0.0057 0.9125 0.1258 0.0022<br>-0.0013 0.2990 0.0091 0.0067 0.1044<br>0.0073 -0.0107 0.0285 0.0450 0.0155<br>0.0444 0.1858 0.0203 -0.1038        |
| 496. | (0.00071) | RY*( 5) | N | 20 | s( 2.14%)p 0.88( 1.88%)d44.94( 95.98%)<br>0.0000 0.0012 0.1337 0.0591 0.0000<br>-0.0054 -0.0124 0.0674 -0.0055 -0.0531<br>0.0026 0.0034 0.0513 -0.0928 -0.3902<br>-0.4361 -0.1709 0.3880 0.6615    |
| 497. | (0.00059) | RY*( 6) | N | 20 | s( 2.76%)p 5.28( 14.61%)d29.90( 82.63%)<br>0.0000 0.0022 0.1563 0.0565 0.0016<br>-0.0166 -0.1126 0.1241 -0.0214 -0.2148<br>0.2013 0.0133 0.1679 -0.0474 -0.3431<br>0.1931 -0.3877 -0.7061 0.1494   |
| 498. | (0.00032) | RY*( 7) | N | 20 | s( 0.06%)p38.29( 2.20%)d99.99( 97.74%)<br>0.0000 -0.0006 0.0229 -0.0069 0.0009<br>-0.0063 -0.0540 -0.0024 0.0034 0.0342<br>0.0550 0.0057 0.1148 -0.0402 0.5780<br>0.3647 0.2040 -0.1017 0.6770     |
| 499. | (0.00014) | RY*( 8) | N | 20 | s( 74.34%)p 0.20( 15.22%)d 0.14( 10.44%)<br>0.0000 0.0055 -0.1416 0.8505 -0.0022<br>0.0028 -0.1037 0.1889 0.0022 0.0054<br>0.3148 -0.0021 -0.0391 -0.0714 0.0136<br>-0.1277 0.2886 -0.0414 -0.0536 |
| 500. | (0.00015) | RY*( 9) | N | 20 | s( 0.10%)p99.99( 13.81%)d99.99( 86.09%)<br>0.0000 0.0007 -0.0044 0.0304 -0.0097<br>0.0119 0.2761 0.0786 0.0023 0.0006<br>-0.0946 0.0059 0.1340 -0.1690 0.5291<br>-0.6301 -0.3196 -0.2796 -0.0602   |
| 501. | (0.00009) | RY*(10) | N | 20 | s( 1.26%)p74.43( 94.02%)d 3.74( 4.72%)                                                                                                                                                             |
| 502. | (0.00006) | RY*(11) | N | 20 | s( 12.83%)p 6.35( 81.47%)d 0.44( 5.70%)                                                                                                                                                            |
| 503. | (0.00004) | RY*(12) | N | 20 | s( 5.44%)p17.17( 93.44%)d 0.20( 1.11%)                                                                                                                                                             |
| 504. | (0.00004) | RY*(13) | N | 20 | s( 6.39%)p 0.70( 4.49%)d13.94( 89.11%)                                                                                                                                                             |
| 505. | (0.00000) | RY*(14) | N | 20 | s( 99.88%)p 0.00( 0.03%)d 0.00( 0.09%)                                                                                                                                                             |
| 506. | (0.00680) | RY*( 1) | C | 21 | s( 6.19%)p14.04( 86.94%)d 1.11( 6.86%)<br>0.0000 0.0060 0.2377 0.0733 -0.0035<br>-0.0145 0.5127 0.0304 0.0087 -0.4612<br>-0.0132 -0.0126 0.6261 0.0182 -0.0376<br>0.1233 -0.2276 0.0142 -0.0019    |
| 507. | (0.00357) | RY*( 2) | C | 21 | s( 0.05%)p99.99( 96.76%)d67.94( 3.19%)<br>0.0000 -0.0035 0.0158 -0.0130 -0.0062<br>-0.0002 -0.8216 -0.0068 -0.0053 -0.3432<br>0.0336 0.0001 0.4090 -0.0792 -0.0785<br>0.0883 0.0394 0.0847 -0.0962 |
| 508. | (0.00291) | RY*( 3) | C | 21 | s( 0.06%)p99.99( 90.61%)d99.99( 9.32%)<br>0.0000 0.0024 0.0224 0.0116 0.0004<br>-0.0044 0.0124 0.0072 0.0022 -0.7532<br>0.0372 0.0082 -0.5806 -0.0065 0.1458<br>0.1322 0.0327 0.0787 0.2173        |
| 509. | (0.00116) | RY*( 4) | C | 21 | s( 34.42%)p 1.62( 55.87%)d 0.28( 9.71%)<br>0.0000 -0.0052 0.5857 0.0290 0.0164<br>-0.0083 -0.1269 0.2483 0.0023 0.0474<br>-0.4787 -0.0007 -0.0393 0.4979 0.0324                                    |



|      |           |         |   |    |            |                 |                 |         |         |
|------|-----------|---------|---|----|------------|-----------------|-----------------|---------|---------|
| 510. | (0.00089) | RY*( 5) | C | 21 | -0.2223    | 0.1118          | 0.1051          | 0.1519  |         |
|      |           |         |   |    | s( 26.65%) | p 0.92( 24.65%) | d 1.83( 48.70%) |         |         |
|      |           |         |   |    | 0.0000     | 0.0009          | -0.1903         | 0.4799  | 0.0058  |
|      |           |         |   |    | -0.0077    | -0.0070         | 0.3572          | 0.0020  | 0.0212  |
|      |           |         |   |    | -0.3418    | -0.0039         | 0.0178          | -0.0349 | 0.2679  |
|      |           |         |   |    | 0.4562     | 0.1933          | -0.3636         | -0.1938 |         |
| 511. | (0.00078) | RY*( 6) | C | 21 | s( 39.45%) | p 0.22( 8.82%)  | d 1.31( 51.73%) |         |         |
|      |           |         |   |    | 0.0000     | 0.0027          | -0.3646         | 0.5114  | -0.0017 |
|      |           |         |   |    | 0.0071     | -0.0044         | 0.2144          | 0.0118  | 0.0263  |
|      |           |         |   |    | -0.1366    | -0.0014         | 0.0666          | -0.1350 | -0.0992 |
|      |           |         |   |    | -0.2739    | -0.1727         | 0.5208          | 0.3625  |         |
| 512. | (0.00068) | RY*( 7) | C | 21 | s( 19.49%) | p 3.18( 61.96%) | d 0.95( 18.56%) |         |         |
|      |           |         |   |    | 0.0000     | -0.0020         | -0.2521         | 0.3623  | 0.0018  |
|      |           |         |   |    | 0.0000     | -0.0182         | -0.2125         | -0.0034 | -0.1291 |
|      |           |         |   |    | 0.2374     | -0.0081         | -0.0536         | 0.7058  | -0.1912 |
|      |           |         |   |    | -0.1490    | -0.1128         | -0.1183         | -0.3163 |         |
| 513. | (0.00043) | RY*( 8) | C | 21 | s( 10.99%) | p 5.45( 59.91%) | d 2.65( 29.09%) |         |         |
|      |           |         |   |    | 0.0000     | -0.0002         | 0.1247          | 0.3072  | -0.0054 |
|      |           |         |   |    | -0.0088    | -0.0827         | -0.6970         | -0.0040 | -0.0001 |
|      |           |         |   |    | -0.2693    | 0.0062          | 0.0378          | -0.1801 | 0.3470  |
|      |           |         |   |    | -0.2288    | -0.1438         | -0.2659         | 0.1638  |         |
| 514. | (0.00039) | RY*( 9) | C | 21 | s( 28.62%) | p 0.87( 24.89%) | d 1.62( 46.49%) |         |         |
|      |           |         |   |    | 0.0000     | 0.0030          | 0.4108          | 0.3428  | 0.0036  |
|      |           |         |   |    | 0.0042     | 0.0268          | 0.0781          | -0.0068 | -0.0571 |
|      |           |         |   |    | 0.0460     | -0.0097         | -0.2306         | -0.4282 | -0.3235 |
|      |           |         |   |    | -0.2406    | -0.0149         | 0.0409          | -0.5481 |         |
| 515. | (0.00036) | RY*(10) | C | 21 | s( 28.13%) | p 1.55( 43.55%) | d 1.01( 28.32%) |         |         |
|      |           |         |   |    | 0.0000     | 0.0027          | 0.3877          | 0.3619  | 0.0036  |
|      |           |         |   |    | -0.0007    | -0.0385         | -0.0367         | 0.0048  | 0.2096  |
|      |           |         |   |    | 0.6190     | 0.0045          | 0.0367          | 0.0640  | 0.3023  |
|      |           |         |   |    | 0.2694     | 0.1837          | 0.2229          | 0.1893  |         |
| 516. | (0.00014) | RY*(11) | C | 21 | s( 2.77%)  | p 3.61( 9.99%)  | d31.55( 87.24%) |         |         |
|      |           |         |   |    | 0.0000     | -0.0057         | 0.1637          | 0.0248  | 0.0142  |
|      |           |         |   |    | -0.0128    | -0.1586         | 0.0100          | 0.0142  | 0.1786  |
|      |           |         |   |    | -0.0614    | -0.0160         | -0.1923         | 0.0372  | -0.2066 |
|      |           |         |   |    | 0.4538     | -0.7824         | -0.0368         | 0.1012  |         |
| 517. | (0.00010) | RY*(12) | C | 21 | s( 0.19%)  | p99.99( 33.98%) | d99.99( 65.83%) |         |         |
|      |           |         |   |    | 0.0000     | -0.0017         | 0.0352          | 0.0197  | -0.0164 |
|      |           |         |   |    | -0.0032    | -0.1033         | 0.4542          | -0.0014 | -0.0547 |
|      |           |         |   |    | 0.3383     | 0.0004          | 0.0336          | -0.0655 | 0.1374  |
|      |           |         |   |    | -0.4390    | -0.2483         | -0.5700         | 0.2452  |         |
| 518. | (0.00005) | RY*(13) | C | 21 | s( 3.38%)  | p 0.64( 2.16%)  | d27.98( 94.46%) |         |         |
| 519. | (0.00000) | RY*(14) | C | 21 | s( 99.66%) | p 0.00( 0.04%)  | d 0.00( 0.30%)  |         |         |
| 520. | (0.00535) | RY*( 1) | C | 22 | s( 0.51%)  | p99.99( 93.02%) | d12.60( 6.47%)  |         |         |
|      |           |         |   |    | 0.0000     | 0.0018          | 0.0289          | 0.0652  | -0.0070 |
|      |           |         |   |    | -0.0108    | 0.2486          | -0.0206         | 0.0194  | -0.7813 |
|      |           |         |   |    | 0.0516     | 0.0122          | -0.5042         | 0.0062  | -0.1289 |
|      |           |         |   |    | -0.0204    | -0.0041         | -0.0381         | -0.2149 |         |
| 521. | (0.00398) | RY*( 2) | C | 22 | s( 4.41%)  | p20.77( 91.62%) | d 0.90( 3.97%)  |         |         |
|      |           |         |   |    | 0.0000     | -0.0064         | 0.2022          | -0.0563 | -0.0012 |
|      |           |         |   |    | -0.0069    | -0.6975         | -0.0712         | -0.0062 | -0.5012 |
|      |           |         |   |    | -0.1016    | -0.0002         | 0.4030          | 0.0247  | -0.0575 |
|      |           |         |   |    | -0.0577    | 0.0834          | 0.1429          | 0.0757  |         |
| 522. | (0.00332) | RY*( 3) | C | 22 | s( 6.57%)  | p12.92( 84.87%) | d 1.30( 8.56%)  |         |         |
|      |           |         |   |    | 0.0000     | 0.0007          | 0.2563          | 0.0005  | 0.0030  |
|      |           |         |   |    | -0.0089    | 0.6097          | 0.0430          | -0.0004 | -0.2209 |
|      |           |         |   |    | 0.0368     | 0.0051          | 0.6517          | -0.0102 | 0.0489  |
|      |           |         |   |    | -0.1980    | 0.1678          | -0.1230         | 0.0270  |         |
| 523. | (0.00190) | RY*( 4) | C | 22 | s( 86.02%) | p 0.13( 11.00%) | d 0.03( 2.97%)  |         |         |
|      |           |         |   |    | 0.0000     | -0.0027         | 0.9273          | -0.0175 | -0.0007 |
|      |           |         |   |    | -0.0046    | -0.0453         | -0.0177         | -0.0155 | 0.1814  |
|      |           |         |   |    | 0.0508     | 0.0016          | -0.2376         | 0.1243  | 0.0383  |
|      |           |         |   |    | 0.0775     | -0.0899         | -0.1161         | -0.0265 |         |
| 524. | (0.00075) | RY*( 5) | C | 22 | s( 0.79%)  | p63.07( 49.97%) | d62.14( 49.23%) |         |         |
|      |           |         |   |    | 0.0000     | -0.0060         | 0.0825          | 0.0313  | 0.0099  |
|      |           |         |   |    | 0.0095     | 0.0592          | -0.3776         | -0.0009 | 0.0181  |
|      |           |         |   |    | 0.0353     | 0.0081          | 0.0691          | -0.5892 | 0.0073  |
|      |           |         |   |    | 0.5777     | 0.2996          | 0.1627          | -0.2057 |         |
| 525. | (0.00047) | RY*( 6) | C | 22 | s( 1.83%)  | p36.13( 66.07%) | d17.56( 32.10%) |         |         |
|      |           |         |   |    | 0.0000     | -0.0030         | 0.0054          | 0.1325  | 0.0263  |
|      |           |         |   |    | 0.0081     | -0.0096         | -0.4489         | 0.0046  | 0.0679  |

|      |           |         |   |    |            |                 |                 |         |         |
|------|-----------|---------|---|----|------------|-----------------|-----------------|---------|---------|
|      |           |         |   |    | 0.6694     | 0.0063          | 0.0713          | -0.0353 | -0.2687 |
|      |           |         |   |    | -0.3120    | -0.2972         | 0.2496          | -0.0300 |         |
| 526. | (0.00045) | RY*( 7) | C | 22 | s( 22.15%) | p 1.95( 43.11%) | d 1.57( 34.74%) |         |         |
|      |           |         |   |    | 0.0000     | 0.0052          | -0.0656         | 0.4660  | 0.0008  |
|      |           |         |   |    | -0.0034    | -0.0514         | -0.0950         | 0.0053  | 0.0278  |
|      |           |         |   |    | 0.2434     | -0.0084         | 0.0158          | 0.5992  | 0.1964  |
|      |           |         |   |    | 0.2005     | 0.4990          | 0.0412          | -0.1340 |         |
| 527. | (0.00033) | RY*( 8) | C | 22 | s( 69.23%) | p 0.35( 24.41%) | d 0.09( 6.37%)  |         |         |
|      |           |         |   |    | 0.0000     | 0.0001          | 0.0592          | 0.8299  | -0.0098 |
|      |           |         |   |    | 0.0033     | -0.0951         | 0.2858          | -0.0091 | 0.0001  |
|      |           |         |   |    | -0.0840    | 0.0052          | 0.0376          | -0.3805 | 0.0599  |
|      |           |         |   |    | -0.1206    | -0.1945         | -0.0877         | -0.0030 |         |
| 528. | (0.00028) | RY*( 9) | C | 22 | s( 2.50%)  | p 6.28( 15.68%) | d32.74( 81.82%) |         |         |
|      |           |         |   |    | 0.0000     | 0.0019          | 0.1246          | 0.0955  | 0.0188  |
|      |           |         |   |    | 0.0147     | 0.1776          | 0.1904          | 0.0029  | 0.0801  |
|      |           |         |   |    | -0.2642    | -0.0081         | -0.0936         | 0.0612  | -0.3667 |
|      |           |         |   |    | -0.0811    | 0.1978          | 0.7772          | 0.1842  |         |
| 529. | (0.00014) | RY*(10) | C | 22 | s( 0.25%)  | p90.73( 22.90%) | d99.99( 76.85%) |         |         |
|      |           |         |   |    | 0.0000     | -0.0007         | 0.0341          | -0.0294 | -0.0223 |
|      |           |         |   |    | -0.0052    | -0.0865         | -0.2545         | 0.0067  | 0.0982  |
|      |           |         |   |    | -0.0842    | -0.0146         | -0.2577         | -0.2708 | 0.1740  |
|      |           |         |   |    | -0.6271    | 0.5650          | -0.1200         | 0.1058  |         |
| 530. | (0.00013) | RY*(11) | C | 22 | s( 0.08%)  | p99.99( 10.69%) | d99.99( 89.24%) |         |         |
|      |           |         |   |    | 0.0000     | -0.0026         | 0.0023          | 0.0217  | 0.0173  |
|      |           |         |   |    | 0.0010     | 0.0851          | -0.0469         | -0.0070 | -0.1825 |
|      |           |         |   |    | 0.2143     | -0.0109         | -0.1196         | -0.0610 | 0.4157  |
|      |           |         |   |    | 0.1934     | -0.0692         | 0.1112          | 0.8155  |         |
| 531. | (0.00008) | RY*(12) | C | 22 | s( 4.15%)  | p20.41( 84.64%) | d 2.70( 11.21%) |         |         |
| 532. | (0.00004) | RY*(13) | C | 22 | s( 1.81%)  | p 1.12( 2.04%)  | d53.11( 96.15%) |         |         |
| 533. | (0.00000) | RY*(14) | C | 22 | s( 99.72%) | p 0.00( 0.13%)  | d 0.00( 0.16%)  |         |         |
| 534. | (0.00409) | RY*( 1) | C | 23 | s( 1.83%)  | p48.80( 89.18%) | d 4.92( 8.99%)  |         |         |
|      |           |         |   |    | 0.0000     | 0.0051          | 0.1349          | -0.0072 | 0.0027  |
|      |           |         |   |    | -0.0001    | 0.0664          | 0.0540          | 0.0097  | 0.2980  |
|      |           |         |   |    | -0.1151    | 0.0240          | 0.8828          | 0.0491  | 0.1462  |
|      |           |         |   |    | -0.0201    | 0.1144          | 0.0508          | 0.2291  |         |
| 535. | (0.00148) | RY*( 2) | C | 23 | s( 0.03%)  | p99.99( 97.90%) | d62.27( 2.07%)  |         |         |
|      |           |         |   |    | 0.0000     | 0.0065          | -0.0092         | 0.0127  | 0.0067  |
|      |           |         |   |    | -0.0159    | -0.0861         | 0.1681          | 0.0155  | -0.9117 |
|      |           |         |   |    | 0.0936     | -0.0040         | 0.3195          | 0.0283  | -0.0200 |
|      |           |         |   |    | -0.1288    | -0.0078         | -0.0602         | 0.0051  |         |
| 536. | (0.00141) | RY*( 3) | C | 23 | s( 2.11%)  | p44.20( 93.20%) | d 2.23( 4.69%)  |         |         |
|      |           |         |   |    | 0.0000     | 0.0016          | 0.1436          | -0.0203 | 0.0071  |
|      |           |         |   |    | -0.0082    | 0.9190          | -0.1511         | 0.0143  | -0.1616 |
|      |           |         |   |    | -0.1670    | -0.0068         | -0.0317         | 0.0959  | -0.0850 |
|      |           |         |   |    | 0.1122     | 0.1104          | 0.0762          | -0.0956 |         |
| 537. | (0.00067) | RY*( 4) | C | 23 | s( 86.84%) | p 0.07( 5.67%)  | d 0.09( 7.49%)  |         |         |
|      |           |         |   |    | 0.0000     | -0.0004         | 0.9197          | -0.1499 | -0.0070 |
|      |           |         |   |    | 0.0052     | -0.0849         | 0.1611          | -0.0170 | 0.0033  |
|      |           |         |   |    | -0.0471    | -0.0129         | -0.1380         | -0.0419 | 0.1006  |
|      |           |         |   |    | -0.1507    | -0.0491         | -0.1915         | -0.0550 |         |
| 538. | (0.00046) | RY*( 5) | C | 23 | s( 5.05%)  | p 1.36( 6.85%)  | d17.46( 88.10%) |         |         |
|      |           |         |   |    | 0.0000     | -0.0001         | 0.2246          | -0.0012 | 0.0000  |
|      |           |         |   |    | -0.0033    | -0.2163         | -0.1216         | -0.0104 | -0.0625 |
|      |           |         |   |    | -0.0539    | -0.0011         | 0.0012          | 0.0042  | -0.3611 |
|      |           |         |   |    | 0.0268     | 0.2350          | 0.8313          | -0.0607 |         |
| 539. | (0.00015) | RY*( 6) | C | 23 | s( 5.74%)  | p 8.95( 51.40%) | d 7.47( 42.86%) |         |         |
|      |           |         |   |    | 0.0000     | -0.0082         | 0.1779          | 0.1582  | -0.0255 |
|      |           |         |   |    | -0.0106    | 0.0304          | -0.4017         | 0.0093  | -0.1001 |
|      |           |         |   |    | 0.3480     | -0.0124         | 0.0583          | -0.4657 | 0.1234  |
|      |           |         |   |    | 0.4389     | -0.3608         | 0.0813          | 0.2898  |         |
| 540. | (0.00011) | RY*( 7) | C | 23 | s( 6.63%)  | p 4.94( 32.75%) | d 9.15( 60.62%) |         |         |
|      |           |         |   |    | 0.0000     | -0.0088         | 0.0787          | 0.2442  | 0.0191  |
|      |           |         |   |    | 0.0090     | -0.0891         | -0.4447         | -0.0163 | 0.0425  |
|      |           |         |   |    | 0.2717     | -0.0023         | 0.1646          | -0.1370 | -0.2254 |
|      |           |         |   |    | -0.0777    | 0.4720          | -0.3499         | -0.4519 |         |
| 541. | (0.00009) | RY*( 8) | C | 23 | s( 9.35%)  | p 6.55( 61.20%) | d 3.15( 29.45%) |         |         |
| 542. | (0.00005) | RY*( 9) | C | 23 | s( 16.43%) | p 1.05( 17.24%) | d 4.04( 66.32%) |         |         |
| 543. | (0.00003) | RY*(10) | C | 23 | s( 0.46%)  | p99.99( 86.90%) | d27.51( 12.64%) |         |         |
| 544. | (0.00003) | RY*(11) | C | 23 | s( 63.04%) | p 0.16( 10.03%) | d 0.43( 26.92%) |         |         |
| 545. | (0.00002) | RY*(12) | C | 23 | s( 1.38%)  | p12.05( 16.63%) | d59.44( 81.99%) |         |         |
| 546. | (0.00002) | RY*(13) | C | 23 | s( 4.44%)  | p 6.97( 30.92%) | d14.58( 64.65%) |         |         |

|      |           |         |   |    |                                                                                                                                                                                                      |
|------|-----------|---------|---|----|------------------------------------------------------------------------------------------------------------------------------------------------------------------------------------------------------|
| 547. | (0.00000) | RY*(14) | C | 23 | s( 96.71%)p 0.00( 0.29%)d 0.03( 3.00%)                                                                                                                                                               |
| 548. | (0.00400) | RY*( 1) | C | 24 | s( 1.02%)p89.09( 90.72%)d 8.12( 8.27%)<br>0.0000 0.0005 0.0910 0.0433 0.0057<br>0.0144 0.4540 -0.0256 -0.0170 -0.5718<br>0.0327 0.0228 0.6082 -0.0379 -0.0184<br>0.1392 -0.2467 0.0401 -0.0216       |
| 549. | (0.00185) | RY*( 2) | C | 24 | s( 0.03%)p99.99( 99.85%)d 3.53( 0.12%)<br>0.0000 -0.0002 0.0114 0.0142 0.0002<br>0.0101 -0.2531 -0.0726 -0.0253 0.5672<br>0.2059 -0.0276 0.7146 0.2300 0.0135<br>0.0273 -0.0012 -0.0157 0.0003       |
| 550. | (0.00092) | RY*( 3) | C | 24 | s( 0.18%)p99.99( 90.28%)d53.28( 9.54%)<br>0.0000 0.0018 0.0310 0.0287 0.0005<br>-0.0050 -0.7765 0.1861 -0.0017 -0.4900<br>0.1086 0.0003 0.1142 -0.0192 -0.0056<br>-0.2457 -0.1539 -0.0720 0.0783     |
| 551. | (0.00055) | RY*( 4) | C | 24 | s( 80.54%)p 0.02( 2.01%)d 0.22( 17.45%)<br>0.0000 -0.0014 0.8898 0.1166 0.0075<br>-0.0054 0.0549 0.0086 0.0091 0.0986<br>-0.0079 -0.0115 -0.0687 0.0479 -0.1743<br>-0.2763 -0.0695 0.2399 0.0731     |
| 552. | (0.00048) | RY*( 5) | C | 24 | s( 18.12%)p 0.13( 2.39%)d 4.39( 79.48%)<br>0.0000 -0.0001 0.4212 0.0618 -0.0032<br>-0.0114 -0.1286 0.0031 -0.0005 -0.0722<br>-0.0377 -0.0029 -0.0246 0.0025 0.3748<br>0.5369 0.2316 -0.5350 -0.1622  |
| 553. | (0.00020) | RY*( 6) | C | 24 | s( 0.07%)p99.99( 34.69%)d99.99( 65.24%)<br>0.0000 0.0015 0.0124 0.0226 -0.0036<br>0.0087 -0.0422 0.1717 -0.0212 0.1059<br>-0.3749 -0.0238 0.1390 -0.3788 0.3722<br>0.1126 0.0290 0.2088 0.6759       |
| 554. | (0.00007) | RY*( 7) | C | 24 | s( 37.25%)p 0.98( 36.56%)d 0.70( 26.19%)                                                                                                                                                             |
| 555. | (0.00005) | RY*( 8) | C | 24 | s( 4.61%)p18.00( 83.04%)d 2.68( 12.35%)                                                                                                                                                              |
| 556. | (0.00004) | RY*( 9) | C | 24 | s( 1.06%)p22.74( 24.13%)d70.53( 74.81%)                                                                                                                                                              |
| 557. | (0.00004) | RY*(10) | C | 24 | s( 0.45%)p99.99( 65.52%)d74.91( 34.02%)                                                                                                                                                              |
| 558. | (0.00001) | RY*(11) | C | 24 | s( 52.15%)p 0.31( 16.29%)d 0.61( 31.56%)                                                                                                                                                             |
| 559. | (0.00000) | RY*(12) | C | 24 | s( 97.88%)p 0.01( 0.74%)d 0.01( 1.37%)                                                                                                                                                               |
| 560. | (0.00001) | RY*(13) | C | 24 | s( 6.40%)p 4.96( 31.74%)d 9.67( 61.86%)                                                                                                                                                              |
| 561. | (0.00000) | RY*(14) | C | 24 | s( 0.28%)p79.46( 22.17%)d99.99( 77.55%)                                                                                                                                                              |
| 562. | (0.00401) | RY*( 1) | C | 25 | s( 1.50%)p59.38( 89.34%)d 6.09( 9.16%)<br>0.0000 0.0053 0.1206 -0.0214 0.0028<br>0.0110 0.4291 0.0333 -0.0207 -0.7628<br>-0.0539 -0.0089 -0.3270 0.1260 -0.0990<br>-0.1168 0.1024 -0.0742 -0.2282    |
| 563. | (0.00145) | RY*( 2) | C | 25 | s( 0.11%)p99.99( 98.42%)d12.77( 1.46%)<br>0.0000 0.0073 0.0313 0.0047 0.0094<br>-0.0056 0.3971 0.0173 0.0076 -0.1520<br>-0.0980 -0.0280 0.8895 0.0366 -0.0058<br>0.0194 0.0922 0.0416 0.0631         |
| 564. | (0.00127) | RY*( 3) | C | 25 | s( 0.07%)p99.99( 92.17%)d99.99( 7.76%)<br>0.0000 -0.0033 0.0208 0.0151 0.0004<br>0.0119 0.7074 -0.2628 0.0059 0.5128<br>-0.1449 0.0023 -0.2595 0.0285 -0.1161<br>0.0668 0.0668 0.2341 -0.0208        |
| 565. | (0.00061) | RY*( 4) | C | 25 | s( 90.64%)p 0.04( 3.50%)d 0.06( 5.85%)<br>0.0000 -0.0008 0.9445 -0.1199 -0.0043<br>-0.0072 -0.0344 0.0209 0.0104 0.1153<br>0.0983 0.0192 0.0119 0.0990 0.1020<br>-0.1840 -0.0481 -0.0129 0.1084      |
| 566. | (0.00048) | RY*( 5) | C | 25 | s( 3.83%)p 1.68( 6.43%)d23.41( 89.74%)<br>0.0000 -0.0001 0.1910 -0.0429 0.0025<br>0.0064 -0.1979 -0.1163 0.0061 -0.0787<br>-0.0627 0.0041 -0.0006 0.0367 0.0694<br>0.7194 0.5108 0.2438 -0.2339      |
| 567. | (0.00015) | RY*( 6) | C | 25 | s( 1.36%)p20.82( 28.41%)d51.46( 70.23%)<br>0.0000 -0.0056 0.1160 -0.0011 -0.0123<br>-0.0093 0.0366 -0.2169 0.0090 -0.0115<br>0.3688 -0.0187 0.1173 -0.2919 -0.3558<br>0.2734 -0.5214 -0.0923 -0.4696 |
| 568. | (0.00008) | RY*( 7) | C | 25 | s( 1.65%)p39.36( 65.07%)d20.13( 33.28%)                                                                                                                                                              |
| 569. | (0.00006) | RY*( 8) | C | 25 | s( 21.87%)p 2.46( 53.82%)d 1.11( 24.31%)                                                                                                                                                             |

|      |           |         |   |    |                                                                                                                                                                                                      |
|------|-----------|---------|---|----|------------------------------------------------------------------------------------------------------------------------------------------------------------------------------------------------------|
| 570. | (0.00005) | RY*( 9) | C | 25 | s( 19.03%)p 2.48( 47.19%)d 1.78( 33.78%)                                                                                                                                                             |
| 571. | (0.00005) | RY*(10) | C | 25 | s( 12.87%)p 1.94( 24.99%)d 4.83( 62.15%)                                                                                                                                                             |
| 572. | (0.00002) | RY*(11) | C | 25 | s( 0.67%)p40.14( 26.95%)d99.99( 72.38%)                                                                                                                                                              |
| 573. | (0.00001) | RY*(12) | C | 25 | s( 1.07%)p27.50( 29.45%)d64.89( 69.48%)                                                                                                                                                              |
| 574. | (0.00002) | RY*(13) | C | 25 | s( 47.54%)p 0.72( 34.21%)d 0.38( 18.26%)                                                                                                                                                             |
| 575. | (0.00000) | RY*(14) | C | 25 | s( 97.81%)p 0.00( 0.21%)d 0.02( 1.99%)                                                                                                                                                               |
| 576. | (0.00511) | RY*( 1) | C | 26 | s( 0.88%)p99.99( 92.22%)d 7.82( 6.89%)<br>0.0000 0.0005 -0.0414 0.0842 -0.0036<br>0.0012 -0.1827 0.0080 -0.0110 0.5261<br>-0.0126 -0.0224 0.7811 -0.0320 0.1019<br>0.0521 -0.0218 0.0684 0.2252      |
| 577. | (0.00300) | RY*( 2) | C | 26 | s( 0.60%)p99.99( 91.61%)d13.10( 7.80%)<br>0.0000 0.0023 0.0771 -0.0015 0.0021<br>0.0058 0.9315 0.0917 -0.0010 0.1550<br>0.0537 -0.0026 0.1126 -0.0168 -0.0332<br>-0.2631 0.0019 0.0347 0.0802        |
| 578. | (0.00288) | RY*( 3) | C | 26 | s( 4.94%)p17.52( 86.54%)d 1.72( 8.52%)<br>0.0000 -0.0013 0.2221 0.0066 0.0044<br>0.0013 0.0467 -0.0441 -0.0048 -0.7572<br>-0.0323 -0.0025 0.5345 0.0345 0.1016<br>-0.0308 0.2574 -0.0870 0.0080      |
| 579. | (0.00144) | RY*( 4) | C | 26 | s( 89.11%)p 0.09( 8.24%)d 0.03( 2.65%)<br>0.0000 -0.0024 0.9434 -0.0323 -0.0048<br>-0.0025 -0.0907 0.0600 -0.0013 0.1873<br>-0.1425 0.0123 -0.0873 0.0862 0.0161<br>-0.0040 -0.1249 -0.1028 -0.0064  |
| 580. | (0.00075) | RY*( 5) | C | 26 | s( 5.56%)p 2.39( 13.31%)d14.58( 81.13%)<br>0.0000 -0.0032 0.1784 0.1541 0.0073<br>-0.0119 -0.0614 -0.2064 -0.0122 -0.0672<br>0.2003 0.0069 0.0133 -0.2039 -0.4164<br>-0.0621 0.0702 0.7931 -0.0052   |
| 581. | (0.00052) | RY*( 6) | C | 26 | s( 24.38%)p 2.53( 61.78%)d 0.57( 13.84%)<br>0.0000 0.0072 -0.0640 0.4895 -0.0004<br>-0.0051 -0.0321 0.3459 0.0092 0.0214<br>-0.6922 -0.0068 -0.0838 -0.1016 0.0616<br>-0.1742 0.2797 0.1525 -0.0522  |
| 582. | (0.00044) | RY*( 7) | C | 26 | s( 33.67%)p 1.12( 37.87%)d 0.85( 28.46%)<br>0.0000 -0.0012 0.0938 0.5726 0.0064<br>0.0165 0.1341 -0.1613 -0.0021 -0.0174<br>0.2458 0.0039 -0.0774 -0.5173 0.2498<br>0.4285 -0.0496 -0.1899 0.0083    |
| 583. | (0.00028) | RY*( 8) | C | 26 | s( 29.52%)p 1.93( 56.96%)d 0.46( 13.52%)<br>0.0000 -0.0012 0.0201 0.5427 -0.0164<br>-0.0051 -0.1002 0.0415 0.0049 0.0630<br>0.4634 0.0039 -0.0583 0.5793 0.0014<br>-0.2812 0.2106 -0.1085 -0.0005    |
| 584. | (0.00020) | RY*( 9) | C | 26 | s( 6.31%)p 1.26( 7.98%)d13.57( 85.70%)<br>0.0000 0.0005 -0.0634 0.2431 -0.0042<br>-0.0038 -0.0981 -0.0401 -0.0127 -0.2231<br>-0.0791 0.0062 0.0627 -0.0917 -0.0659<br>-0.4469 -0.7830 -0.0740 0.1855 |
| 585. | (0.00013) | RY*(10) | C | 26 | s( 0.00%)p 1.00( 19.38%)d 4.16( 80.62%)<br>0.0000 -0.0016 0.0020 0.0051 -0.0032<br>-0.0062 -0.0771 0.1463 0.0112 0.1059<br>0.1333 0.0041 0.1974 -0.3135 -0.3838<br>-0.2364 0.0397 -0.3061 -0.7125    |
| 586. | (0.00011) | RY*(11) | C | 26 | s( 4.82%)p 9.66( 46.56%)d10.09( 48.62%)<br>0.0000 -0.0030 -0.0603 0.2110 0.0063<br>0.0068 0.1971 -0.3081 -0.0010 -0.0092<br>-0.3225 0.0112 0.1350 0.4575 -0.3149<br>0.4722 -0.2619 -0.0036 -0.3090   |
| 587. | (0.00009) | RY*(12) | C | 26 | s( 0.02%)p99.99( 75.33%)d99.99( 24.65%)                                                                                                                                                              |
| 588. | (0.00004) | RY*(13) | C | 26 | s( 0.49%)p 4.67( 2.31%)d99.99( 97.20%)                                                                                                                                                               |
| 589. | (0.00000) | RY*(14) | C | 26 | s( 99.72%)p 0.00( 0.05%)d 0.00( 0.22%)                                                                                                                                                               |
| 590. | (0.00369) | RY*( 1) | C | 27 | s( 7.32%)p11.63( 85.14%)d 1.03( 7.54%)<br>0.0000 0.0043 0.2566 0.0852 0.0085<br>-0.0168 -0.4806 0.0086 0.0023 0.1484<br>-0.0246 -0.0255 -0.7709 0.0505 -0.0744<br>0.2466 -0.0618 0.0701 -0.0172      |
| 591. | (0.00170) | RY*( 2) | C | 27 | s( 9.77%)p 8.29( 80.99%)d 0.94( 9.24%)<br>0.0000 0.0011 0.3032 0.0760 0.0074                                                                                                                         |

|      |           |         |      |            |                 |                 |         |         |
|------|-----------|---------|------|------------|-----------------|-----------------|---------|---------|
|      |           |         |      | 0.0012     | -0.4057         | 0.0502          | 0.0015  | -0.7697 |
|      |           |         |      | 0.0687     | -0.0031         | 0.2112          | -0.0323 | -0.1825 |
|      |           |         |      | -0.0066    | 0.1495          | 0.0167          | 0.1908  |         |
| 592. | (0.00140) | RY*( 3) | C 27 | s( 6.28%)  | p11.20( 70.31%) | d 3.73( 23.42%) |         |         |
|      |           |         |      | 0.0000     | 0.0085          | 0.2059          | 0.1414  | -0.0183 |
|      |           |         |      | -0.0114    | -0.4190         | 0.0113          | 0.0035  | 0.4713  |
|      |           |         |      | 0.3076     | -0.0012         | 0.4587          | 0.0091  | 0.0756  |
|      |           |         |      | -0.0225    | -0.2119         | 0.3714          | 0.2123  |         |
| 593. | (0.00074) | RY*( 4) | C 27 | s( 15.75%) | p 3.52( 55.41%) | d 1.83( 28.84%) |         |         |
|      |           |         |      | 0.0000     | 0.0031          | 0.2708          | 0.2889  | -0.0268 |
|      |           |         |      | -0.0003    | 0.2104          | -0.5178         | 0.0087  | -0.0945 |
|      |           |         |      | 0.1880     | -0.0027         | 0.0283          | 0.4434  | 0.3737  |
|      |           |         |      | 0.2871     | -0.0720         | -0.2344         | 0.0782  |         |
| 594. | (0.00059) | RY*( 5) | C 27 | s( 22.77%) | p 2.53( 57.61%) | d 0.86( 19.62%) |         |         |
|      |           |         |      | 0.0000     | -0.0025         | 0.4542          | 0.1460  | 0.0066  |
|      |           |         |      | -0.0101    | 0.5335          | 0.2296          | -0.0085 | 0.0151  |
|      |           |         |      | 0.4150     | -0.0028         | -0.1817         | -0.1818 | -0.1130 |
|      |           |         |      | -0.0455    | 0.2785          | 0.3216          | 0.0200  |         |
| 595. | (0.00037) | RY*( 6) | C 27 | s( 36.87%) | p 1.44( 53.14%) | d 0.27( 9.99%)  |         |         |
|      |           |         |      | 0.0000     | -0.0019         | 0.5484          | -0.2597 | -0.0197 |
|      |           |         |      | -0.0109    | 0.1544          | 0.0906          | 0.0037  | 0.0260  |
|      |           |         |      | -0.6557    | -0.0089         | 0.0970          | 0.2431  | 0.0676  |
|      |           |         |      | -0.1018    | -0.1824         | 0.2274          | -0.0038 |         |
| 596. | (0.00029) | RY*( 7) | C 27 | s( 1.63%)  | p11.44( 18.70%) | d48.73( 79.66%) |         |         |
|      |           |         |      | 0.0000     | -0.0011         | -0.0458         | 0.1173  | -0.0221 |
|      |           |         |      | 0.0013     | 0.1070          | 0.0386          | 0.0098  | -0.2919 |
|      |           |         |      | 0.1806     | 0.0102          | -0.1931         | -0.1371 | 0.1403  |
|      |           |         |      | -0.3553    | -0.7980         | 0.0957          | -0.0689 |         |
| 597. | (0.00025) | RY*( 8) | C 27 | s( 17.52%) | p 1.79( 31.34%) | d 2.92( 51.14%) |         |         |
|      |           |         |      | 0.0000     | 0.0014          | -0.2452         | 0.3379  | 0.0298  |
|      |           |         |      | 0.0109     | -0.0481         | -0.1893         | -0.0024 | -0.0517 |
|      |           |         |      | -0.0641    | 0.0079          | -0.0823         | 0.5114  | -0.2067 |
|      |           |         |      | -0.4333    | 0.2115          | 0.4320          | -0.2226 |         |
| 598. | (0.00019) | RY*( 9) | C 27 | s( 1.95%)  | p30.95( 60.46%) | d19.24( 37.59%) |         |         |
|      |           |         |      | 0.0000     | 0.0049          | 0.1043          | -0.0842 | 0.0393  |
|      |           |         |      | 0.0152     | -0.1480         | 0.5900          | 0.0024  | 0.0013  |
|      |           |         |      | 0.2568     | -0.0019         | 0.0670          | 0.4048  | 0.2758  |
|      |           |         |      | -0.0914    | 0.0554          | -0.2855         | -0.4549 |         |
| 599. | (0.00016) | RY*(10) | C 27 | s( 8.38%)  | p 1.78( 14.92%) | d 9.15( 76.70%) |         |         |
|      |           |         |      | 0.0000     | 0.0007          | 0.0940          | 0.2712  | 0.0378  |
|      |           |         |      | -0.0056    | 0.1112          | 0.1970          | -0.0180 | 0.1916  |
|      |           |         |      | -0.0297    | 0.0046          | 0.0233          | 0.2439  | -0.5949 |
|      |           |         |      | -0.1443    | -0.1949         | -0.4841         | 0.3463  |         |
| 600. | (0.00011) | RY*(11) | C 27 | s( 24.17%) | p 1.22( 29.49%) | d 1.92( 46.34%) |         |         |
|      |           |         |      | 0.0000     | -0.0025         | -0.2651         | 0.4136  | -0.0171 |
|      |           |         |      | -0.0027    | 0.0596          | 0.4585          | 0.0126  | -0.0761 |
|      |           |         |      | -0.2540    | 0.0152          | -0.0850         | 0.0573  | 0.4284  |
|      |           |         |      | 0.1222     | 0.0838          | 0.1415          | 0.4878  |         |
| 601. | (0.00008) | RY*(12) | C 27 | s( 44.22%) | p 0.65( 28.75%) | d 0.61( 27.03%) |         |         |
| 602. | (0.00003) | RY*(13) | C 27 | s( 4.03%)  | p 3.43( 13.82%) | d20.37( 82.15%) |         |         |
| 603. | (0.00000) | RY*(14) | C 27 | s( 99.27%) | p 0.00( 0.16%)  | d 0.01( 0.57%)  |         |         |
| 604. | (0.00154) | RY*( 1) | C 28 | s( 6.61%)  | p11.31( 74.81%) | d 2.81( 18.57%) |         |         |
|      |           |         |      | 0.0000     | 0.0013          | -0.1670         | 0.1956  | -0.0047 |
|      |           |         |      | -0.0037    | 0.2667          | 0.1248          | -0.0058 | 0.0209  |
|      |           |         |      | 0.0449     | -0.0130         | -0.8094         | -0.0595 | 0.0400  |
|      |           |         |      | -0.3159    | -0.2781         | 0.0572          | 0.0612  |         |
| 605. | (0.00098) | RY*( 2) | C 28 | s( 0.99%)  | p73.32( 72.32%) | d27.07( 26.70%) |         |         |
|      |           |         |      | 0.0000     | 0.0015          | -0.0504         | 0.0855  | -0.0042 |
|      |           |         |      | -0.0123    | -0.5298         | 0.1271          | 0.0102  | 0.6408  |
|      |           |         |      | 0.0149     | -0.0010         | -0.1072         | 0.0607  | -0.0755 |
|      |           |         |      | -0.1115    | -0.0081         | -0.4963         | -0.0497 |         |
| 606. | (0.00025) | RY*( 3) | C 28 | s( 16.37%) | p 4.90( 80.26%) | d 0.21( 3.37%)  |         |         |
|      |           |         |      | 0.0000     | 0.0067          | -0.2362         | 0.3283  | -0.0095 |
|      |           |         |      | -0.0079    | 0.5258          | 0.3684          | -0.0074 | 0.4121  |
|      |           |         |      | 0.3535     | 0.0033          | 0.3092          | 0.0007  | 0.0429  |
|      |           |         |      | 0.1097     | 0.1124          | 0.0625          | -0.0573 |         |
| 607. | (0.00014) | RY*( 4) | C 28 | s( 3.48%)  | p20.00( 69.57%) | d 7.75( 26.95%) |         |         |
|      |           |         |      | 0.0000     | 0.0107          | -0.1193         | 0.1318  | -0.0552 |
|      |           |         |      | 0.0071     | -0.4089         | -0.1720         | -0.0047 | -0.0802 |
|      |           |         |      | 0.6414     | -0.0033         | 0.0794          | 0.2735  | 0.2617  |
|      |           |         |      | -0.0880    | -0.2739         | 0.3371          | 0.0684  |         |

|      |           |         |   |    |                                                                                                                                                                                                      |
|------|-----------|---------|---|----|------------------------------------------------------------------------------------------------------------------------------------------------------------------------------------------------------|
| 608. | (0.00011) | RY*( 5) | C | 28 | s( 21.91%)p 3.25( 71.31%)d 0.31( 6.78%)<br>0.0000 -0.0132 -0.0870 0.4536 0.0751<br>0.0026 -0.0074 -0.6613 -0.0027 0.2979<br>-0.2050 -0.0007 0.0490 -0.3775 -0.0122<br>0.0352 0.0243 0.2283 0.1168    |
| 609. | (0.00008) | RY*( 6) | C | 28 | s( 37.88%)p 1.03( 38.94%)d 0.61( 23.19%)                                                                                                                                                             |
| 610. | (0.00004) | RY*( 7) | C | 28 | s( 57.02%)p 0.20( 11.32%)d 0.56( 31.65%)                                                                                                                                                             |
| 611. | (0.00003) | RY*( 8) | C | 28 | s( 11.49%)p 7.18( 82.45%)d 0.53( 6.06%)                                                                                                                                                              |
| 612. | (0.00001) | RY*( 9) | C | 28 | s( 21.84%)p 0.97( 21.29%)d 2.60( 56.87%)                                                                                                                                                             |
| 613. | (0.00001) | RY*(10) | C | 28 | s( 13.28%)p 1.43( 19.04%)d 5.10( 67.69%)                                                                                                                                                             |
| 614. | (0.00001) | RY*(11) | C | 28 | s( 0.80%)p54.81( 43.70%)d69.60( 55.50%)                                                                                                                                                              |
| 615. | (0.00001) | RY*(12) | C | 28 | s( 5.75%)p 2.06( 11.86%)d14.33( 82.39%)                                                                                                                                                              |
| 616. | (0.00000) | RY*(13) | C | 28 | s( 98.81%)p 0.01( 0.99%)d 0.00( 0.19%)                                                                                                                                                               |
| 617. | (0.00001) | RY*(14) | C | 28 | s( 3.77%)p 0.61( 2.32%)d24.89( 93.91%)                                                                                                                                                               |
| 618. | (0.00356) | RY*( 1) | C | 29 | s( 2.79%)p32.06( 89.42%)d 2.79( 7.79%)<br>0.0000 0.0047 0.1641 0.0302 0.0041<br>-0.0156 -0.4976 0.0491 0.0239 0.7047<br>-0.0285 -0.0084 -0.3722 0.0854 -0.1524<br>0.1486 -0.1678 -0.0546 0.0386      |
| 619. | (0.00128) | RY*( 2) | C | 29 | s( 0.71%)p99.99( 78.58%)d29.36( 20.71%)<br>0.0000 0.0085 0.0020 0.0834 0.0038<br>-0.0030 0.1214 -0.0067 0.0013 -0.3440<br>-0.0554 -0.0091 -0.7731 -0.2276 0.0822<br>0.0652 -0.3037 0.1161 -0.3007    |
| 620. | (0.00112) | RY*( 3) | C | 29 | s( 0.06%)p99.99( 85.15%)d99.99( 14.79%)<br>0.0000 0.0016 0.0199 0.0150 0.0014<br>0.0026 -0.7529 0.1401 -0.0009 -0.4931<br>0.1070 -0.0004 0.0942 -0.0399 0.1657<br>0.2244 0.0899 -0.2415 -0.0604      |
| 621. | (0.00066) | RY*( 4) | C | 29 | s( 1.06%)p48.76( 51.69%)d44.57( 47.25%)<br>0.0000 0.0002 0.1030 -0.0006 -0.0008<br>-0.0135 0.3230 0.5447 -0.0065 0.1369<br>0.3032 0.0021 -0.0694 0.0100 0.1016<br>0.5354 0.3598 -0.1093 -0.1846      |
| 622. | (0.00050) | RY*( 5) | C | 29 | s( 50.40%)p 0.34( 17.28%)d 0.64( 32.32%)<br>0.0000 0.0040 0.7013 0.1101 -0.0066<br>-0.0108 0.0771 0.0560 0.0146 -0.0781<br>-0.1786 -0.0074 0.1701 -0.3105 -0.4046<br>-0.1275 -0.0376 -0.2983 -0.2299 |
| 623. | (0.00032) | RY*( 6) | C | 29 | s( 8.37%)p 9.07( 75.93%)d 1.88( 15.70%)<br>0.0000 -0.0024 0.2679 -0.1052 0.0287<br>-0.0027 0.0487 0.1830 0.0094 -0.2776<br>-0.0690 0.0068 -0.2894 0.7468 -0.2040<br>-0.1769 0.1261 -0.0514 0.2559    |
| 624. | (0.00025) | RY*( 7) | C | 29 | s( 4.32%)p11.99( 51.79%)d10.16( 43.89%)<br>0.0000 0.0001 0.2077 -0.0049 -0.0053<br>-0.0013 0.0059 -0.4769 0.0037 -0.0205<br>-0.5123 0.0003 0.0273 0.1637 0.1279<br>0.5115 0.3013 0.2288 -0.1333      |
| 625. | (0.00026) | RY*( 8) | C | 29 | s( 15.51%)p 1.18( 18.35%)d 4.26( 66.14%)<br>0.0000 -0.0029 0.3936 -0.0107 -0.0067<br>-0.0037 0.0291 0.0963 -0.0003 0.0450<br>0.1331 -0.0122 0.2709 0.2830 0.5201<br>0.0036 -0.5511 0.2255 -0.1907    |
| 626. | (0.00017) | RY*( 9) | C | 29 | s( 0.20%)p99.99( 21.59%)d99.99( 78.20%)<br>0.0000 0.0025 0.0048 0.0442 -0.0079<br>0.0190 -0.1972 0.3767 0.0066 -0.0782<br>-0.0690 -0.0042 0.1199 -0.0974 -0.3433<br>-0.0348 0.0757 0.8073 -0.0743    |
| 627. | (0.00014) | RY*(10) | C | 29 | s( 0.88%)p63.71( 56.02%)d49.02( 43.10%)<br>0.0000 0.0074 0.0932 -0.0052 -0.0057<br>0.0020 0.0009 0.4105 -0.0051 0.0673<br>-0.5549 0.0143 -0.0869 -0.2673 0.4761<br>-0.1988 0.1309 -0.0350 0.3827     |
| 628. | (0.00010) | RY*(11) | C | 29 | s( 17.83%)p 2.21( 39.44%)d 2.40( 42.72%)                                                                                                                                                             |
| 629. | (0.00002) | RY*(12) | C | 29 | s( 95.59%)p 0.02( 1.82%)d 0.03( 2.59%)                                                                                                                                                               |
| 630. | (0.00002) | RY*(13) | C | 29 | s( 2.41%)p 5.42( 13.03%)d35.16( 84.56%)                                                                                                                                                              |
| 631. | (0.00000) | RY*(14) | C | 29 | s( 99.83%)p 0.00( 0.12%)d 0.00( 0.05%)                                                                                                                                                               |
| 632. | (0.00169) | RY*( 1) | C | 30 | s( 3.14%)p25.64( 80.53%)d 5.20( 16.33%)<br>0.0000 0.0008 -0.1059 0.1419 -0.0064<br>-0.0027 0.2973 0.0852 0.0136 0.8061                                                                               |

|      |           |         |   |    |                                                                                                                                                                                                                                                                           |
|------|-----------|---------|---|----|---------------------------------------------------------------------------------------------------------------------------------------------------------------------------------------------------------------------------------------------------------------------------|
| 633. | (0.00101) | RY*( 2) | C | 30 | -0.0023 0.0048 0.2433 0.0195 0.3717<br>0.0593 -0.0953 0.0363 -0.1057<br>s( 2.56%)p29.66( 75.87%)d 8.43( 21.57%)<br>0.0000 0.0009 -0.1126 0.1135 -0.0044<br>-0.0057 -0.0932 0.1002 0.0051 0.2223<br>-0.0517 -0.0122 -0.8280 0.0452 0.1791<br>-0.3305 0.0489 -0.0914 0.2524 |
| 634. | (0.00032) | RY*( 3) | C | 30 | s( 20.08%)p 3.92( 78.77%)d 0.06( 1.15%)<br>0.0000 0.0055 -0.3162 0.3172 -0.0125<br>-0.0144 0.7158 0.3822 -0.0008 -0.3353<br>0.0188 0.0034 -0.0681 -0.1081 -0.0890<br>-0.0051 0.0492 0.0268 -0.0199                                                                        |
| 635. | (0.00017) | RY*( 4) | C | 30 | s( 10.75%)p 4.85( 52.07%)d 3.46( 37.19%)<br>0.0000 0.0007 0.3006 -0.1305 -0.0085<br>-0.0013 0.1450 0.2746 0.0012 -0.0626<br>-0.1860 -0.0115 0.3083 0.5391 0.0880<br>-0.3978 0.1299 -0.1030 0.4223                                                                         |
| 636. | (0.00010) | RY*( 5) | C | 30 | s( 19.55%)p 3.56( 69.64%)d 0.55( 10.80%)<br>0.0000 -0.0172 -0.2065 0.3816 0.0836<br>-0.0025 0.1276 -0.6569 0.0023 -0.0814<br>0.2521 -0.0034 0.0330 0.4212 0.0661<br>0.0874 0.1240 -0.2345 0.1603                                                                          |
| 637. | (0.00007) | RY*( 6) | C | 30 | s( 44.77%)p 0.95( 42.32%)d 0.29( 12.91%)                                                                                                                                                                                                                                  |
| 638. | (0.00003) | RY*( 7) | C | 30 | s( 36.34%)p 0.34( 12.28%)d 1.41( 51.38%)                                                                                                                                                                                                                                  |
| 639. | (0.00003) | RY*( 8) | C | 30 | s( 12.70%)p 4.01( 50.92%)d 2.86( 36.38%)                                                                                                                                                                                                                                  |
| 640. | (0.00001) | RY*( 9) | C | 30 | s( 32.91%)p 0.54( 17.74%)d 1.50( 49.35%)                                                                                                                                                                                                                                  |
| 641. | (0.00001) | RY*(10) | C | 30 | s( 0.43%)p99.99( 94.18%)d12.42( 5.39%)                                                                                                                                                                                                                                    |
| 642. | (0.00001) | RY*(11) | C | 30 | s( 13.79%)p 1.33( 18.35%)d 4.92( 67.86%)                                                                                                                                                                                                                                  |
| 643. | (0.00001) | RY*(12) | C | 30 | s( 0.20%)p13.39( 2.70%)d99.99( 97.10%)                                                                                                                                                                                                                                    |
| 644. | (0.00001) | RY*(13) | C | 30 | s( 3.54%)p 1.17( 4.15%)d26.06( 92.31%)                                                                                                                                                                                                                                    |
| 645. | (0.00000) | RY*(14) | C | 30 | s( 99.23%)p 0.01( 0.66%)d 0.00( 0.11%)                                                                                                                                                                                                                                    |
| 646. | (0.00656) | RY*( 1) | C | 31 | s( 6.29%)p13.79( 86.69%)d 1.12( 7.02%)<br>0.0000 0.0078 0.2402 0.0716 0.0032<br>0.0128 -0.6562 -0.0227 -0.0077 0.2615<br>0.0217 0.0137 -0.6047 -0.0303 0.0154<br>0.1913 -0.1295 0.1271 -0.0218                                                                            |
| 647. | (0.00339) | RY*( 2) | C | 31 | s( 0.39%)p99.99( 96.13%)d 8.82( 3.48%)<br>0.0000 -0.0019 0.0596 -0.0196 -0.0031<br>-0.0037 -0.6070 0.1027 -0.0029 -0.6412<br>-0.0270 -0.0002 0.4121 0.0240 -0.0685<br>0.0424 -0.1163 -0.0855 0.0864                                                                       |
| 648. | (0.00263) | RY*( 3) | C | 31 | s( 0.05%)p99.99( 87.83%)d99.99( 12.12%)<br>0.0000 0.0020 0.0230 -0.0034 0.0009<br>-0.0047 0.2919 0.0019 0.0081 -0.6578<br>0.0237 0.0051 -0.5984 0.0404 -0.1972<br>-0.0846 -0.0964 -0.0130 -0.2562                                                                         |
| 649. | (0.00107) | RY*( 4) | C | 31 | s( 42.97%)p 1.19( 51.30%)d 0.13( 5.73%)<br>0.0000 -0.0045 0.6545 0.0365 -0.0046<br>0.0003 0.0677 -0.5544 -0.0048 -0.0515<br>0.0915 0.0067 0.1182 -0.4195 -0.0037<br>-0.1283 0.1099 -0.1590 -0.0586                                                                        |
| 650. | (0.00083) | RY*( 5) | C | 31 | s( 4.50%)p 1.42( 6.39%)d19.82( 89.11%)<br>0.0000 -0.0006 0.1594 -0.1398 0.0027<br>-0.0078 -0.0006 -0.0738 -0.0077 -0.0040<br>0.1276 0.0047 0.0185 0.2042 -0.1803<br>-0.5435 -0.1456 0.6384 0.3667                                                                         |
| 651. | (0.00075) | RY*( 6) | C | 31 | s( 72.07%)p 0.20( 14.69%)d 0.18( 13.24%)<br>0.0000 0.0012 -0.3389 0.7783 -0.0012<br>0.0061 -0.0498 -0.1070 0.0037 0.0145<br>0.0218 0.0074 0.0650 -0.3578 -0.1815<br>-0.1621 -0.2003 0.1627 -0.0811                                                                        |
| 652. | (0.00059) | RY*( 7) | C | 31 | s( 10.98%)p 4.68( 51.34%)d 3.43( 37.68%)<br>0.0000 -0.0001 -0.1188 0.3093 -0.0013<br>0.0049 0.0246 -0.4102 -0.0097 -0.1908<br>0.3694 -0.0045 -0.0891 0.4045 0.4260<br>0.2093 0.2021 0.0017 0.3327                                                                         |
| 653. | (0.00044) | RY*( 8) | C | 31 | s( 0.83%)p82.57( 68.40%)d37.14( 30.77%)<br>0.0000 -0.0005 0.0039 0.0908 0.0051<br>-0.0085 -0.0998 -0.3466 -0.0030 0.0011<br>-0.6216 0.0073 0.0928 0.3986 0.1442<br>-0.1149 0.1267 0.2099 -0.4622                                                                          |

|      |           |         |   |    |                                                                                                                                                                                                      |
|------|-----------|---------|---|----|------------------------------------------------------------------------------------------------------------------------------------------------------------------------------------------------------|
| 654. | (0.00035) | RY*( 9) | C | 31 | s( 8.93%)p 5.73( 51.19%)d 4.46( 39.88%)<br>0.0000 0.0011 0.2181 0.2044 0.0039<br>0.0019 0.1372 0.3372 -0.0095 -0.1687<br>-0.5078 -0.0042 -0.1267 -0.2772 0.4195<br>0.0210 0.1572 0.1550 0.4167       |
| 655. | (0.00029) | RY*(10) | C | 31 | s( 46.95%)p 0.97( 45.44%)d 0.16( 7.60%)<br>0.0000 0.0027 0.5224 0.4433 0.0063<br>-0.0014 0.1062 0.4472 0.0030 0.0964<br>0.1843 0.0011 0.1191 0.4309 -0.0150<br>-0.0919 -0.0868 -0.1506 -0.1928       |
| 656. | (0.00012) | RY*(11) | C | 31 | s( 0.85%)p30.23( 25.65%)d86.61( 73.50%)<br>0.0000 0.0006 0.0841 0.0374 0.0020<br>0.0090 0.1813 -0.2479 0.0006 0.0638<br>-0.3428 0.0032 0.0090 0.2013 -0.2247<br>0.2621 -0.6500 -0.2378 0.3698        |
| 657. | (0.00013) | RY*(12) | C | 31 | s( 2.66%)p 4.15( 11.03%)d32.47( 86.31%)<br>0.0000 -0.0076 0.1580 -0.0309 0.0249<br>0.0157 0.1866 0.0293 -0.0055 -0.0803<br>0.1322 0.0156 0.1998 -0.1013 -0.0246<br>0.6562 -0.1206 0.6075 -0.2199     |
| 658. | (0.00005) | RY*(13) | C | 31 | s( 2.93%)p 1.37( 4.02%)d31.79( 93.05%)                                                                                                                                                               |
| 659. | (0.00000) | RY*(14) | C | 31 | s( 99.64%)p 0.00( 0.03%)d 0.00( 0.33%)                                                                                                                                                               |
| 660. | (0.00502) | RY*( 1) | C | 32 | s( 0.62%)p99.99( 92.33%)d11.33( 7.05%)<br>0.0000 0.0014 0.0108 0.0781 -0.0019<br>0.0130 -0.4209 0.0333 -0.0189 0.7145<br>-0.0220 -0.0097 0.4830 -0.0118 -0.1535<br>-0.0697 -0.0732 0.0647 -0.1804    |
| 661. | (0.00294) | RY*( 2) | C | 32 | s( 2.28%)p38.97( 88.97%)d 3.83( 8.74%)<br>0.0000 0.0009 0.1488 -0.0261 0.0019<br>0.0002 -0.1167 -0.0031 -0.0034 0.4803<br>0.0580 -0.0033 -0.8004 -0.0373 0.0177<br>-0.2386 0.1396 0.0747 0.0718      |
| 662. | (0.00278) | RY*( 3) | C | 32 | s( 4.86%)p17.97( 87.36%)d 1.60( 7.78%)<br>0.0000 -0.0012 0.2200 0.0130 0.0059<br>-0.0015 -0.8208 -0.0872 -0.0041 -0.4197<br>-0.0554 -0.0024 -0.0992 0.0562 -0.0443<br>-0.0552 0.0731 -0.2509 -0.0670 |
| 663. | (0.00147) | RY*( 4) | C | 32 | s( 88.84%)p 0.10( 8.63%)d 0.03( 2.52%)<br>0.0000 -0.0025 0.9398 -0.0720 -0.0048<br>-0.0142 0.1847 -0.1409 0.0016 0.0180<br>0.0568 0.0049 0.1575 -0.0616 0.0718<br>0.0817 0.0040 0.1156 0.0040        |
| 664. | (0.00065) | RY*( 5) | C | 32 | s( 1.75%)p 6.46( 11.34%)d49.54( 86.91%)<br>0.0000 -0.0023 0.1074 0.0773 0.0046<br>0.0012 0.0066 0.1462 0.0045 -0.0230<br>-0.2504 -0.0041 0.0113 0.1691 -0.3973<br>-0.2552 -0.4924 -0.0334 0.6345     |
| 665. | (0.00051) | RY*( 6) | C | 32 | s( 7.69%)p 9.32( 71.63%)d 2.69( 20.68%)<br>0.0000 -0.0065 0.1376 0.2405 0.0090<br>-0.0111 -0.0039 0.6445 0.0024 0.0078<br>0.0495 -0.0130 -0.1464 0.5260 -0.0011<br>0.3651 -0.1012 0.0312 -0.2497     |
| 666. | (0.00049) | RY*( 7) | C | 32 | s( 54.50%)p 0.63( 34.47%)d 0.20( 11.03%)<br>0.0000 0.0043 0.0865 0.7332 0.0013<br>0.0060 0.1296 0.1231 0.0050 -0.0139<br>-0.3229 0.0001 -0.0357 -0.4549 0.0283<br>-0.1052 0.0490 -0.2761 -0.1409     |
| 667. | (0.00028) | RY*( 8) | C | 32 | s( 28.96%)p 2.14( 61.96%)d 0.31( 9.07%)<br>0.0000 -0.0008 -0.0206 0.5375 -0.0172<br>-0.0052 0.0520 -0.3426 0.0020 -0.0320<br>0.5768 0.0061 0.0820 0.3988 -0.0289<br>-0.2474 0.1245 0.0066 0.1147     |
| 668. | (0.00021) | RY*( 9) | C | 32 | s( 4.28%)p 3.13( 13.39%)d19.25( 82.34%)<br>0.0000 0.0001 -0.0418 0.2025 0.0022<br>-0.0125 -0.2068 0.1483 -0.0102 -0.1967<br>-0.0718 0.0019 0.0358 -0.1540 0.2235<br>-0.1349 0.0134 0.8635 0.0969     |
| 669. | (0.00015) | RY*(10) | C | 32 | s( 1.98%)p18.74( 37.14%)d30.72( 60.88%)<br>0.0000 0.0027 -0.0459 0.1331 0.0013<br>-0.0067 0.0205 -0.5309 -0.0003 -0.0279<br>-0.1698 -0.0162 -0.2338 0.0669 -0.2545                                   |



|      |           |         |   |    |                                          |
|------|-----------|---------|---|----|------------------------------------------|
| 670. | (0.00012) | RY*(11) | C | 32 | 0.2601 -0.5104 0.2239 -0.4072            |
|      |           |         |   |    | s( 3.93%)p 2.92( 11.47%)d21.53( 84.60%)  |
|      |           |         |   |    | 0.0000 -0.0014 -0.0606 0.1883 -0.0120    |
|      |           |         |   |    | -0.0061 -0.1689 -0.2121 0.0110 0.1903    |
|      |           |         |   |    | -0.0579 0.0015 -0.0297 -0.0234 0.3787    |
|      |           |         |   |    | 0.6554 -0.0104 -0.0691 0.5179            |
| 671. | (0.00007) | RY*(12) | C | 32 | s( 0.02%)p99.99( 74.86%)d99.99( 25.13%)  |
| 672. | (0.00004) | RY*(13) | C | 32 | s( 1.42%)p 4.50( 6.41%)d64.77( 92.17%)   |
| 673. | (0.00000) | RY*(14) | C | 32 | s( 98.88%)p 0.00( 0.19%)d 0.01( 0.93%)   |
| 674. | (0.00405) | RY*( 1) | C | 33 | s( 1.68%)p53.09( 89.26%)d 5.39( 9.06%)   |
|      |           |         |   |    | 0.0000 0.0055 0.1284 -0.0168 0.0035      |
|      |           |         |   |    | -0.0007 -0.0682 -0.1148 -0.0134 -0.4689  |
|      |           |         |   |    | 0.0462 -0.0211 -0.8061 -0.0488 0.1574    |
|      |           |         |   |    | -0.0105 0.1414 -0.0957 0.1912            |
| 675. | (0.00148) | RY*( 2) | C | 33 | s( 0.51%)p99.99( 95.52%)d 7.82( 3.97%)   |
|      |           |         |   |    | 0.0000 0.0052 0.0698 0.0121 0.0057       |
|      |           |         |   |    | 0.0212 -0.4082 -0.1524 -0.0103 0.7641    |
|      |           |         |   |    | -0.1432 0.0048 -0.4001 0.0198 -0.1404    |
|      |           |         |   |    | -0.0479 -0.0740 -0.0880 0.0670           |
| 676. | (0.00134) | RY*( 3) | C | 33 | s( 0.07%)p99.99( 92.95%)d99.99( 6.98%)   |
|      |           |         |   |    | 0.0000 -0.0045 -0.0168 0.0177 -0.0076    |
|      |           |         |   |    | -0.0115 0.8614 -0.1184 0.0106 0.2320     |
|      |           |         |   |    | -0.2176 -0.0063 -0.2055 0.1726 -0.0720   |
|      |           |         |   |    | 0.0182 -0.1557 -0.0950 0.1761            |
| 677. | (0.00059) | RY*( 4) | C | 33 | s( 94.05%)p 0.04( 3.29%)d 0.03( 2.66%)   |
|      |           |         |   |    | 0.0000 -0.0009 0.9606 -0.1328 -0.0046    |
|      |           |         |   |    | -0.0117 0.0654 -0.0649 0.0163 0.0160     |
|      |           |         |   |    | 0.0662 0.0129 0.1298 0.0490 0.0061       |
|      |           |         |   |    | -0.1385 -0.0127 0.0123 -0.0841           |
| 678. | (0.00046) | RY*( 5) | C | 33 | s( 0.48%)p19.90( 9.47%)d99.99( 90.05%)   |
|      |           |         |   |    | 0.0000 -0.0002 0.0581 0.0366 0.0066      |
|      |           |         |   |    | -0.0055 -0.1384 -0.0452 -0.0041 -0.2018  |
|      |           |         |   |    | -0.1198 0.0032 0.1347 0.0159 -0.2763     |
|      |           |         |   |    | 0.2828 -0.3065 -0.8041 0.0609            |
| 679. | (0.00015) | RY*( 6) | C | 33 | s( 1.86%)p16.91( 31.50%)d35.76( 66.64%)  |
|      |           |         |   |    | 0.0000 -0.0049 0.1261 0.0491 -0.0175     |
|      |           |         |   |    | 0.0172 -0.0747 0.3984 -0.0072 0.1110     |
|      |           |         |   |    | 0.1124 0.0108 -0.0201 0.3534 0.3618      |
|      |           |         |   |    | 0.6398 -0.1421 0.1378 0.2949             |
| 680. | (0.00009) | RY*( 7) | C | 33 | s( 9.31%)p 6.82( 63.52%)d 2.92( 27.17%)  |
| 681. | (0.00008) | RY*( 8) | C | 33 | s( 3.11%)p22.94( 71.33%)d 8.22( 25.56%)  |
| 682. | (0.00005) | RY*( 9) | C | 33 | s( 9.98%)p 2.09( 20.86%)d 6.93( 69.16%)  |
| 683. | (0.00004) | RY*(10) | C | 33 | s( 6.54%)p12.60( 82.36%)d 1.70( 11.10%)  |
| 684. | (0.00003) | RY*(11) | C | 33 | s( 20.44%)p 0.27( 5.55%)d 3.62( 74.02%)  |
| 685. | (0.00002) | RY*(12) | C | 33 | s( 54.08%)p 0.35( 18.92%)d 0.50( 27.00%) |
| 686. | (0.00001) | RY*(13) | C | 33 | s( 0.96%)p16.17( 15.53%)d86.99( 83.51%)  |
| 687. | (0.00000) | RY*(14) | C | 33 | s( 96.98%)p 0.00( 0.07%)d 0.03( 2.94%)   |
| 688. | (0.00413) | RY*( 1) | C | 34 | s( 0.96%)p94.35( 91.02%)d 8.31( 8.02%)   |
|      |           |         |   |    | 0.0000 0.0011 0.0904 0.0380 0.0061       |
|      |           |         |   |    | -0.0242 -0.7342 0.0528 0.0072 0.1953     |
|      |           |         |   |    | -0.0111 -0.0199 -0.5719 0.0439 0.0297    |
|      |           |         |   |    | 0.1888 -0.1667 0.1242 -0.0206            |
| 689. | (0.00186) | RY*( 2) | C | 34 | s( 0.02%)p99.99( 99.98%)d 0.34( 0.01%)   |
|      |           |         |   |    | 0.0000 0.0001 -0.0084 0.0097 -0.0005     |
|      |           |         |   |    | -0.0133 0.3022 0.1094 0.0269 -0.6581     |
|      |           |         |   |    | -0.2076 0.0251 -0.6140 -0.2042 0.0022    |
|      |           |         |   |    | 0.0003 0.0020 0.0066 0.0018              |
| 690. | (0.00087) | RY*( 3) | C | 34 | s( 0.03%)p99.99( 90.29%)d99.99( 9.68%)   |
|      |           |         |   |    | 0.0000 0.0021 -0.0107 0.0151 0.0000      |
|      |           |         |   |    | -0.0017 -0.5083 0.1148 -0.0036 -0.6400   |
|      |           |         |   |    | 0.1537 0.0016 0.4356 -0.0909 0.1402      |
|      |           |         |   |    | 0.0732 0.1529 0.0316 -0.2177             |
| 691. | (0.00054) | RY*( 4) | C | 34 | s( 88.32%)p 0.02( 1.50%)d 0.12( 10.18%)  |
|      |           |         |   |    | 0.0000 -0.0011 0.9347 0.0975 0.0060      |
|      |           |         |   |    | 0.0109 0.0221 -0.0595 -0.0062 -0.0648    |
|      |           |         |   |    | -0.0082 0.0116 0.0738 -0.0307 -0.0379    |
|      |           |         |   |    | -0.1876 -0.0142 0.2025 0.1548            |
| 692. | (0.00052) | RY*( 5) | C | 34 | s( 11.14%)p 0.37( 4.17%)d 7.60( 84.68%)  |
|      |           |         |   |    | 0.0000 -0.0006 0.3087 0.1269 0.0023      |
|      |           |         |   |    | 0.0093 0.1144 0.0601 0.0047 0.1208       |
|      |           |         |   |    | 0.0245 -0.0014 -0.0523 -0.0836 0.0863    |

|      |           |         |   |    |                                                                                                                                                                                                                                 |
|------|-----------|---------|---|----|---------------------------------------------------------------------------------------------------------------------------------------------------------------------------------------------------------------------------------|
| 693. | (0.00019) | RY*( 6) | C | 34 | 0.4700 0.1323 -0.6408 -0.4364<br>s( 0.01%)p99.99( 28.53%)d99.99( 71.45%)<br>0.0000 -0.0003 0.0106 0.0049 0.0003<br>-0.0106 0.0535 -0.1714 0.0222 -0.1107<br>0.3392 0.0215 -0.1070 0.3365 0.4997<br>0.2631 0.2512 -0.1161 0.5648 |
| 694. | (0.00007) | RY*( 7) | C | 34 | s( 39.08%)p 0.78( 30.38%)d 0.78( 30.54%)                                                                                                                                                                                        |
| 695. | (0.00005) | RY*( 8) | C | 34 | s( 12.97%)p 5.96( 77.33%)d 0.75( 9.70%)                                                                                                                                                                                         |
| 696. | (0.00003) | RY*( 9) | C | 34 | s( 6.97%)p 8.85( 61.68%)d 4.50( 31.35%)                                                                                                                                                                                         |
| 697. | (0.00003) | RY*(10) | C | 34 | s( 4.70%)p 4.29( 20.17%)d15.99( 75.13%)                                                                                                                                                                                         |
| 698. | (0.00003) | RY*(11) | C | 34 | s( 31.71%)p 1.85( 58.69%)d 0.30( 9.59%)                                                                                                                                                                                         |
| 699. | (0.00000) | RY*(12) | C | 34 | s( 98.70%)p 0.00( 0.37%)d 0.01( 0.93%)                                                                                                                                                                                          |
| 700. | (0.00000) | RY*(13) | C | 34 | s( 5.36%)p 4.00( 21.44%)d13.67( 73.20%)                                                                                                                                                                                         |
| 701. | (0.00001) | RY*(14) | C | 34 | s( 0.06%)p99.99( 14.60%)d99.99( 85.34%)                                                                                                                                                                                         |
| 702. | (0.00425) | RY*( 1) | C | 35 | s( 1.84%)p48.64( 89.43%)d 4.75( 8.73%)<br>0.0000 0.0058 0.1337 -0.0216 0.0035<br>-0.0152 -0.6070 -0.0703 0.0182 0.6636<br>-0.0198 0.0085 0.2619 -0.1049 -0.1598<br>-0.1713 -0.0072 -0.0314 -0.1771                              |
| 703. | (0.00143) | RY*( 2) | C | 35 | s( 0.37%)p99.99( 98.30%)d 3.61( 1.34%)<br>0.0000 0.0067 0.0599 0.0019 0.0079<br>0.0164 -0.4563 -0.0972 0.0047 -0.0732<br>0.0033 0.0232 -0.8712 0.0110 0.0029<br>0.0036 0.0489 -0.0647 0.0822                                    |
| 704. | (0.00118) | RY*( 3) | C | 35 | s( 0.31%)p99.99( 93.27%)d20.50( 6.42%)<br>0.0000 0.0041 0.0428 -0.0359 -0.0009<br>-0.0040 -0.5557 0.1630 -0.0071 -0.6466<br>0.2307 0.0058 0.3172 -0.1591 0.0867<br>-0.1019 0.0912 0.1931 -0.0267                                |
| 705. | (0.00061) | RY*( 4) | C | 35 | s( 92.57%)p 0.04( 3.98%)d 0.04( 3.45%)<br>0.0000 -0.0018 0.9568 -0.1009 -0.0055<br>0.0051 0.1454 0.0569 -0.0141 -0.0505<br>-0.0429 -0.0184 0.0032 -0.1024 0.0275<br>-0.0672 -0.0311 -0.0805 0.1476                              |
| 706. | (0.00048) | RY*( 5) | C | 35 | s( 1.55%)p 1.50( 2.33%)d61.84( 96.12%)<br>0.0000 0.0009 0.1136 -0.0500 -0.0117<br>-0.0028 0.0787 -0.0067 -0.0063 0.0757<br>0.0204 0.0026 -0.0814 -0.0651 0.4550<br>0.2482 0.4855 0.1116 -0.6666                                 |
| 707. | (0.00015) | RY*( 6) | C | 35 | s( 1.01%)p34.68( 35.09%)d63.17( 63.90%)<br>0.0000 -0.0051 0.0934 0.0343 -0.0141<br>0.0126 -0.0204 0.5418 -0.0016 -0.0136<br>-0.0666 0.0166 -0.1261 0.1895 -0.3319<br>0.2575 -0.4495 0.3073 -0.4075                              |
| 708. | (0.00009) | RY*( 7) | C | 35 | s( 0.83%)p99.99( 92.98%)d 7.49( 6.19%)                                                                                                                                                                                          |
| 709. | (0.00009) | RY*( 8) | C | 35 | s( 0.73%)p87.03( 63.72%)d48.55( 35.55%)                                                                                                                                                                                         |
| 710. | (0.00007) | RY*( 9) | C | 35 | s( 5.32%)p 7.44( 39.56%)d10.36( 55.12%)                                                                                                                                                                                         |
| 711. | (0.00004) | RY*(10) | C | 35 | s( 37.44%)p 0.50( 18.83%)d 1.17( 43.73%)                                                                                                                                                                                        |
| 712. | (0.00002) | RY*(11) | C | 35 | s( 1.70%)p11.25( 19.14%)d46.54( 79.16%)                                                                                                                                                                                         |
| 713. | (0.00002) | RY*(12) | C | 35 | s( 0.91%)p25.87( 23.60%)d82.77( 75.49%)                                                                                                                                                                                         |
| 714. | (0.00002) | RY*(13) | C | 35 | s( 57.28%)p 0.35( 19.87%)d 0.40( 22.85%)                                                                                                                                                                                        |
| 715. | (0.00000) | RY*(14) | C | 35 | s( 98.15%)p 0.00( 0.05%)d 0.02( 1.79%)                                                                                                                                                                                          |
| 716. | (0.00522) | RY*( 1) | C | 36 | s( 0.63%)p99.99( 92.52%)d10.92( 6.85%)<br>0.0000 0.0013 0.0026 0.0791 -0.0026<br>-0.0028 0.1936 0.0078 0.0138 -0.6125<br>0.0148 0.0219 -0.7149 0.0236 0.1494<br>0.1061 0.0612 -0.0227 0.1753                                    |
| 717. | (0.00289) | RY*( 2) | C | 36 | s( 3.29%)p26.45( 87.09%)d 2.92( 9.62%)<br>0.0000 -0.0010 0.1813 0.0062 0.0054<br>-0.0023 -0.8835 -0.0413 0.0041 0.0552<br>-0.0290 0.0031 -0.2910 -0.0099 -0.0147<br>-0.2534 0.1483 -0.0399 0.0901                               |
| 718. | (0.00273) | RY*( 3) | C | 36 | s( 1.32%)p67.71( 89.27%)d 7.14( 9.41%)<br>0.0000 0.0025 0.1139 0.0141 0.0021<br>0.0005 0.2378 0.0492 0.0057 0.7233<br>0.0870 -0.0015 -0.5497 -0.0291 0.1010<br>0.0630 0.1480 -0.1522 -0.1867                                    |
| 719. | (0.00147) | RY*( 4) | C | 36 | s( 89.23%)p 0.08( 7.02%)d 0.04( 3.75%)<br>0.0000 -0.0027 0.9417 -0.0735 -0.0045<br>-0.0056 0.1424 -0.1158 -0.0070 -0.0998<br>0.0456 -0.0085 0.1040 -0.1161 0.0233                                                               |

|      |           |         |   |    |                                                                                                                                                                                                                                   |
|------|-----------|---------|---|----|-----------------------------------------------------------------------------------------------------------------------------------------------------------------------------------------------------------------------------------|
| 720. | (0.00078) | RY*( 5) | C | 36 | 0.0125 0.0163 0.1836 -0.0535<br>s( 8.07%)p 3.95( 31.90%)d 7.44( 60.03%)<br>0.0000 -0.0050 0.2398 0.1521 0.0060<br>-0.0160 -0.0882 0.4448 -0.0086 -0.0305<br>-0.2210 0.0009 0.0411 0.2482 -0.2015<br>0.3273 -0.2885 -0.6058 0.0481 |
| 721. | (0.00050) | RY*( 6) | C | 36 | s( 42.21%)p 0.96( 40.50%)d 0.41( 17.29%)<br>0.0000 0.0053 0.0411 0.6484 0.0001<br>0.0080 0.0551 -0.4053 -0.0059 -0.0393<br>0.4550 0.0037 0.1158 0.1247 0.0087<br>-0.2014 0.0380 -0.3617 -0.0020                                   |
| 722. | (0.00044) | RY*( 7) | C | 36 | s( 21.45%)p 1.51( 32.34%)d 2.15( 46.21%)<br>0.0000 -0.0015 0.0580 0.4595 0.0036<br>-0.0006 0.0367 0.4198 0.0150 0.1714<br>0.0201 -0.0123 -0.0172 0.3397 0.0744<br>-0.1398 -0.1214 0.5483 0.3488                                   |
| 723. | (0.00027) | RY*( 8) | C | 36 | s( 21.70%)p 3.18( 69.03%)d 0.43( 9.27%)<br>0.0000 -0.0006 -0.0157 0.4652 -0.0207<br>0.0009 0.0687 0.2200 -0.0060 -0.0462<br>-0.4461 -0.0034 0.0541 -0.6581 0.0144<br>-0.1699 0.2243 -0.0505 -0.1035                               |
| 724. | (0.00020) | RY*( 9) | C | 36 | s( 4.74%)p 2.15( 10.21%)d17.93( 85.05%)<br>0.0000 -0.0001 -0.0315 0.2154 -0.0042<br>-0.0163 -0.2482 0.0626 -0.0028 -0.0806<br>0.0688 0.0027 0.1166 0.1071 0.5037<br>0.5629 0.1877 0.1650 -0.4663                                  |
| 725. | (0.00011) | RY*(10) | C | 36 | s( 5.40%)p 4.60( 24.83%)d12.92( 69.77%)<br>0.0000 -0.0007 -0.0513 0.2267 -0.0005<br>-0.0073 -0.1392 -0.3080 0.0022 0.0844<br>0.0157 -0.0125 -0.1958 -0.2969 -0.3975<br>0.3904 -0.5490 0.2853 -0.0664                              |
| 726. | (0.00012) | RY*(11) | C | 36 | s( 0.12%)p99.99( 16.70%)d99.99( 83.18%)<br>0.0000 -0.0027 -0.0092 0.0311 -0.0128<br>0.0083 0.0362 0.2257 -0.0110 -0.1927<br>0.0726 -0.0021 -0.1299 0.2350 -0.4245<br>-0.3341 -0.0011 0.1390 -0.7216                               |
| 727. | (0.00007) | RY*(12) | C | 36 | s( 1.40%)p68.52( 96.02%)d 1.84( 2.58%)                                                                                                                                                                                            |
| 728. | (0.00004) | RY*(13) | C | 36 | s( 1.18%)p 2.14( 2.52%)d81.57( 96.30%)                                                                                                                                                                                            |
| 729. | (0.00000) | RY*(14) | C | 36 | s( 99.28%)p 0.00( 0.21%)d 0.01( 0.51%)                                                                                                                                                                                            |
| 730. | (0.00347) | RY*( 1) | C | 37 | s( 2.63%)p34.07( 89.62%)d 2.95( 7.75%)<br>0.0000 0.0040 0.1587 0.0329 0.0037<br>0.0170 0.6112 -0.0787 0.0061 0.1011<br>0.0516 0.0225 0.7080 -0.0385 -0.0335<br>0.2408 0.0107 0.1334 -0.0210                                       |
| 731. | (0.00128) | RY*( 2) | C | 37 | s( 0.93%)p83.10( 77.43%)d23.23( 21.64%)<br>0.0000 0.0081 0.0093 0.0957 0.0031<br>0.0090 0.5572 0.1102 -0.0034 -0.4651<br>-0.2228 0.0014 -0.4308 -0.0088 0.2844<br>0.0825 -0.2720 0.1680 0.1629                                    |
| 732. | (0.00115) | RY*( 3) | C | 37 | s( 0.73%)p99.99( 86.33%)d17.78( 12.94%)<br>0.0000 -0.0025 0.0805 -0.0282 -0.0017<br>0.0005 0.3151 -0.1490 0.0007 0.7558<br>-0.0763 0.0058 -0.4003 0.0659 -0.1109<br>-0.1212 0.0903 0.1994 0.2336                                  |
| 733. | (0.00063) | RY*( 4) | C | 37 | s( 0.70%)p68.19( 47.40%)d74.67( 51.90%)<br>0.0000 0.0026 0.0780 0.0294 -0.0006<br>-0.0050 0.1840 0.1705 -0.0097 0.1269<br>0.4063 0.0072 -0.2503 -0.4087 -0.0962<br>0.3785 -0.0747 -0.5972 -0.0650                                 |
| 734. | (0.00052) | RY*( 5) | C | 37 | s( 42.68%)p 0.56( 23.81%)d 0.79( 33.51%)<br>0.0000 0.0042 0.6390 0.1354 -0.0081<br>0.0135 -0.2173 0.3426 0.0007 0.0516<br>-0.2411 0.0141 -0.0040 -0.1112 0.3064<br>0.2361 0.4027 0.0816 0.1291                                    |
| 735. | (0.00034) | RY*( 6) | C | 37 | s( 18.83%)p 3.73( 70.24%)d 0.58( 10.93%)<br>0.0000 -0.0009 0.4290 -0.0624 0.0200<br>0.0013 0.0065 -0.7085 0.0107 -0.3372<br>0.1529 0.0073 -0.1429 -0.2065 -0.2258<br>-0.0818 0.2108 0.0359 0.0768                                 |
| 736. | (0.00026) | RY*( 7) | C | 37 | s( 15.39%)p 1.08( 16.62%)d 4.42( 68.00%)<br>0.0000 -0.0012 0.3917 -0.0164 -0.0147                                                                                                                                                 |

|      |           |         |   |    |                                          |         |         |         |         |
|------|-----------|---------|---|----|------------------------------------------|---------|---------|---------|---------|
|      |           |         |   |    | 0.0091                                   | -0.2178 | -0.2423 | -0.0074 | 0.2150  |
|      |           |         |   |    | -0.0837                                  | 0.0005  | 0.0729  | 0.0363  | 0.2658  |
|      |           |         |   |    | 0.0345                                   | -0.7694 | -0.0654 | -0.1087 |         |
| 737. | (0.00024) | RY*( 8) | C | 37 | s( 0.58%)p99.99( 62.41%)d63.36( 37.00%)  |         |         |         |         |
|      |           |         |   |    | 0.0000                                   | -0.0019 | 0.0750  | 0.0142  | 0.0032  |
|      |           |         |   |    | 0.0056                                   | -0.0638 | 0.2303  | -0.0010 | -0.0056 |
|      |           |         |   |    | 0.7282                                   | -0.0028 | -0.0070 | -0.1914 | 0.1852  |
|      |           |         |   |    | -0.2265                                  | -0.1083 | 0.5162  | 0.0788  |         |
| 738. | (0.00017) | RY*( 9) | C | 37 | s( 0.84%)p13.12( 10.96%)d99.99( 88.20%)  |         |         |         |         |
|      |           |         |   |    | 0.0000                                   | 0.0016  | -0.0538 | 0.0703  | -0.0227 |
|      |           |         |   |    | 0.0109                                   | -0.1803 | 0.1050  | 0.0107  | -0.0644 |
|      |           |         |   |    | -0.0869                                  | -0.0142 | 0.1676  | -0.1609 | -0.3622 |
|      |           |         |   |    | 0.0838                                   | -0.2479 | -0.0100 | 0.8260  |         |
| 739. | (0.00014) | RY*(10) | C | 37 | s( 0.95%)p80.29( 76.12%)d24.19( 22.94%)  |         |         |         |         |
|      |           |         |   |    | 0.0000                                   | -0.0081 | 0.0812  | -0.0510 | 0.0150  |
|      |           |         |   |    | 0.0109                                   | -0.0445 | -0.0660 | -0.0021 | -0.0686 |
|      |           |         |   |    | 0.3609                                   | 0.0088  | -0.0956 | 0.7814  | 0.0090  |
|      |           |         |   |    | 0.4374                                   | 0.0448  | -0.0382 | 0.1856  |         |
| 740. | (0.00011) | RY*(11) | C | 37 | s( 20.31%)p 1.22( 24.71%)d 2.71( 54.98%) |         |         |         |         |
|      |           |         |   |    | 0.0000                                   | 0.0012  | 0.4130  | -0.1785 | -0.0260 |
|      |           |         |   |    | -0.0059                                  | 0.1091  | 0.4193  | 0.0161  | -0.1145 |
|      |           |         |   |    | -0.0500                                  | 0.0120  | -0.0704 | 0.1958  | -0.6357 |
|      |           |         |   |    | -0.2206                                  | -0.1699 | 0.0473  | -0.2566 |         |
| 741. | (0.00002) | RY*(12) | C | 37 | s( 3.08%)p 4.12( 12.67%)d27.40( 84.25%)  |         |         |         |         |
| 742. | (0.00002) | RY*(13) | C | 37 | s( 92.52%)p 0.02( 1.80%)d 0.06( 5.68%)   |         |         |         |         |
| 743. | (0.00000) | RY*(14) | C | 37 | s( 99.79%)p 0.00( 0.11%)d 0.00( 0.10%)   |         |         |         |         |
| 744. | (0.00174) | RY*( 1) | C | 38 | s( 2.32%)p35.38( 81.96%)d 6.79( 15.72%)  |         |         |         |         |
|      |           |         |   |    | 0.0000                                   | 0.0006  | -0.0782 | 0.1304  | -0.0062 |
|      |           |         |   |    | 0.0020                                   | 0.1880  | -0.0155 | 0.0123  | 0.8765  |
|      |           |         |   |    | 0.0396                                   | 0.0078  | 0.0947  | -0.0715 | 0.1783  |
|      |           |         |   |    | -0.0643                                  | -0.2895 | -0.0833 | -0.1747 |         |
| 745. | (0.00102) | RY*( 2) | C | 38 | s( 2.67%)p28.76( 76.80%)d 7.69( 20.53%)  |         |         |         |         |
|      |           |         |   |    | 0.0000                                   | 0.0011  | -0.1107 | 0.1201  | -0.0047 |
|      |           |         |   |    | 0.0125                                   | 0.8320  | -0.0463 | -0.0037 | -0.2425 |
|      |           |         |   |    | 0.0053                                   | 0.0056  | 0.0601  | -0.1051 | -0.0019 |
|      |           |         |   |    | -0.3784                                  | 0.1172  | 0.0901  | -0.2006 |         |
| 746. | (0.00031) | RY*( 3) | C | 38 | s( 17.51%)p 4.63( 81.08%)d 0.08( 1.41%)  |         |         |         |         |
|      |           |         |   |    | 0.0000                                   | 0.0064  | -0.2669 | 0.3218  | -0.0171 |
|      |           |         |   |    | -0.0048                                  | -0.0197 | 0.1964  | -0.0041 | 0.0161  |
|      |           |         |   |    | 0.1017                                   | 0.0131  | -0.7853 | -0.3799 | -0.0107 |
|      |           |         |   |    | 0.0282                                   | 0.0247  | -0.0312 | 0.1079  |         |
| 747. | (0.00018) | RY*( 4) | C | 38 | s( 12.62%)p 3.98( 50.29%)d 2.94( 37.08%) |         |         |         |         |
|      |           |         |   |    | 0.0000                                   | 0.0038  | 0.3239  | -0.1437 | -0.0252 |
|      |           |         |   |    | 0.0101                                   | -0.2725 | -0.4667 | -0.0046 | 0.1379  |
|      |           |         |   |    | 0.2076                                   | 0.0001  | -0.1041 | -0.3712 | -0.1601 |
|      |           |         |   |    | -0.4781                                  | 0.2581  | 0.1572  | -0.1590 |         |
| 748. | (0.00009) | RY*( 5) | C | 38 | s( 23.57%)p 2.67( 62.82%)d 0.58( 13.61%) |         |         |         |         |
| 749. | (0.00007) | RY*( 6) | C | 38 | s( 46.97%)p 0.89( 41.63%)d 0.24( 11.41%) |         |         |         |         |
| 750. | (0.00003) | RY*( 7) | C | 38 | s( 26.15%)p 1.96( 51.32%)d 0.86( 22.53%) |         |         |         |         |
| 751. | (0.00003) | RY*( 8) | C | 38 | s( 8.56%)p 2.19( 18.78%)d 8.49( 72.66%)  |         |         |         |         |
| 752. | (0.00001) | RY*( 9) | C | 38 | s( 47.39%)p 0.54( 25.45%)d 0.57( 27.15%) |         |         |         |         |
| 753. | (0.00000) | RY*(10) | C | 38 | s( 0.91%)p 2.82( 2.56%)d99.99( 96.54%)   |         |         |         |         |
| 754. | (0.00001) | RY*(11) | C | 38 | s( 0.38%)p99.99( 99.10%)d 1.36( 0.52%)   |         |         |         |         |
| 755. | (0.00000) | RY*(12) | C | 38 | s( 99.19%)p 0.01( 0.73%)d 0.00( 0.08%)   |         |         |         |         |
| 756. | (0.00001) | RY*(13) | C | 38 | s( 2.69%)p 0.51( 1.37%)d35.65( 95.94%)   |         |         |         |         |
| 757. | (0.00001) | RY*(14) | C | 38 | s( 9.07%)p 0.69( 6.30%)d 9.33( 84.63%)   |         |         |         |         |
| 758. | (0.00358) | RY*( 1) | C | 39 | s( 3.11%)p28.66( 89.23%)d 2.46( 7.66%)   |         |         |         |         |
|      |           |         |   |    | 0.0000                                   | 0.0041  | 0.1727  | 0.0357  | 0.0050  |
|      |           |         |   |    | 0.0250                                   | 0.7755  | -0.0500 | -0.0165 | -0.4090 |
|      |           |         |   |    | -0.0042                                  | 0.0085  | 0.3344  | -0.0908 | -0.1242 |
|      |           |         |   |    | 0.2149                                   | -0.0570 | 0.1080  | 0.0092  |         |
| 759. | (0.00126) | RY*( 2) | C | 39 | s( 0.74%)p99.99( 78.35%)d28.15( 20.91%)  |         |         |         |         |
|      |           |         |   |    | 0.0000                                   | 0.0076  | 0.0056  | 0.0856  | 0.0024  |
|      |           |         |   |    | 0.0037                                   | 0.1499  | -0.0257 | -0.0006 | 0.6808  |
|      |           |         |   |    | 0.0997                                   | 0.0082  | 0.4664  | 0.2634  | 0.1062  |
|      |           |         |   |    | 0.0734                                   | -0.3740 | 0.0306  | -0.2272 |         |
| 760. | (0.00115) | RY*( 3) | C | 39 | s( 1.08%)p76.42( 82.17%)d15.58( 16.75%)  |         |         |         |         |
|      |           |         |   |    | 0.0000                                   | 0.0055  | 0.0903  | 0.0507  | 0.0022  |
|      |           |         |   |    | 0.0023                                   | -0.5006 | 0.1274  | 0.0013  | -0.3630 |
|      |           |         |   |    | 0.1470                                   | 0.0025  | 0.6335  | -0.0132 | -0.0857 |
|      |           |         |   |    | -0.1726                                  | -0.1427 | 0.3094  | 0.1194  |         |

|      |           |         |   |    |                                                                                                                                                                                                      |
|------|-----------|---------|---|----|------------------------------------------------------------------------------------------------------------------------------------------------------------------------------------------------------|
| 761. | (0.00064) | RY*( 4) | C | 39 | s( 1.01%)p52.66( 53.38%)d44.99( 45.60%)<br>0.0000 -0.0007 0.0956 -0.0314 -0.0013<br>-0.0072 0.1818 0.2807 -0.0106 0.3144<br>0.3356 0.0035 -0.1229 -0.4418 -0.2582<br>-0.3101 -0.1883 0.0728 0.5025   |
| 762. | (0.00052) | RY*( 5) | C | 39 | s( 47.39%)p 0.48( 22.72%)d 0.63( 29.90%)<br>0.0000 0.0044 0.6777 0.1208 -0.0086<br>0.0133 -0.0776 0.0128 -0.0100 0.0140<br>0.2715 0.0087 -0.2486 0.2914 -0.4361<br>-0.0069 0.0698 0.0877 -0.3102     |
| 763. | (0.00031) | RY*( 6) | C | 39 | s( 5.44%)p11.81( 64.24%)d 5.57( 30.32%)<br>0.0000 -0.0024 0.2155 -0.0842 0.0296<br>0.0080 -0.1545 -0.4522 -0.0074 0.2407<br>-0.1800 -0.0085 0.3309 -0.4626 -0.2852<br>0.1129 0.3455 -0.2996 0.0022   |
| 764. | (0.00026) | RY*( 7) | C | 39 | s( 22.14%)p 1.38( 30.64%)d 2.13( 47.22%)<br>0.0000 -0.0039 0.4689 -0.0390 -0.0020<br>0.0065 -0.0859 -0.3402 0.0004 -0.0630<br>-0.3100 0.0099 -0.1984 -0.2089 0.3802<br>-0.0434 -0.5474 0.1360 0.0875 |
| 765. | (0.00021) | RY*( 8) | C | 39 | s( 3.17%)p13.14( 41.64%)d17.42( 55.19%)<br>0.0000 -0.0005 0.1652 -0.0661 0.0056<br>-0.0004 -0.0257 0.3309 -0.0025 0.0636<br>0.2718 0.0024 0.0103 -0.4778 0.4734<br>0.2081 0.2621 0.2157 -0.4114      |
| 766. | (0.00017) | RY*( 9) | C | 39 | s( 0.10%)p99.99( 51.45%)d99.99( 48.45%)<br>0.0000 -0.0063 -0.0075 0.0264 0.0141<br>-0.0031 0.0573 0.2114 -0.0159 0.2249<br>-0.6441 0.0111 -0.0211 -0.0164 -0.2111<br>-0.0919 0.2123 0.6202 -0.0416   |
| 767. | (0.00014) | RY*(10) | C | 39 | s( 0.63%)p69.51( 43.74%)d88.39( 55.63%)<br>0.0000 -0.0052 -0.0294 0.0734 -0.0032<br>0.0119 -0.1283 0.5114 0.0106 -0.0960<br>-0.3138 0.0058 -0.0131 -0.2266 -0.2999<br>0.2572 -0.4171 -0.4015 -0.2549 |
| 768. | (0.00010) | RY*(11) | C | 39 | s( 18.27%)p 1.63( 29.81%)d 2.84( 51.92%)                                                                                                                                                             |
| 769. | (0.00002) | RY*(12) | C | 39 | s( 2.32%)p 4.84( 11.23%)d37.27( 86.45%)                                                                                                                                                              |
| 770. | (0.00002) | RY*(13) | C | 39 | s( 94.74%)p 0.02( 1.50%)d 0.04( 3.76%)                                                                                                                                                               |
| 771. | (0.00000) | RY*(14) | C | 39 | s( 99.81%)p 0.00( 0.12%)d 0.00( 0.07%)                                                                                                                                                               |
| 772. | (0.00162) | RY*( 1) | C | 40 | s( 3.58%)p22.18( 79.28%)d 4.80( 17.15%)<br>0.0000 0.0007 -0.1167 0.1486 -0.0066<br>0.0105 0.6975 0.0141 -0.0081 -0.0529<br>0.0721 -0.0062 -0.5408 -0.0730 0.2889<br>-0.1669 -0.1781 0.1622 0.0463    |
| 773. | (0.00097) | RY*( 2) | C | 40 | s( 2.89%)p25.21( 72.76%)d 8.44( 24.36%)<br>0.0000 0.0012 -0.1157 0.1244 -0.0037<br>0.0080 0.4559 -0.0588 -0.0011 0.2545<br>0.0970 0.0129 0.6593 -0.0843 0.2826<br>-0.0305 0.3966 -0.0329 -0.0662     |
| 774. | (0.00029) | RY*( 3) | C | 40 | s( 20.74%)p 3.68( 76.31%)d 0.14( 2.96%)<br>0.0000 0.0067 -0.3215 0.3221 -0.0155<br>-0.0044 -0.2136 0.1433 -0.0129 0.6768<br>0.4471 0.0033 -0.1921 -0.0425 -0.1319<br>0.0242 -0.0742 -0.0770 -0.0127  |
| 775. | (0.00015) | RY*( 4) | C | 40 | s( 9.06%)p 6.78( 61.40%)d 3.26( 29.54%)<br>0.0000 0.0023 0.2555 -0.1586 -0.0125<br>0.0037 -0.1546 -0.3276 0.0024 0.0635<br>0.1366 0.0092 -0.3435 -0.5848 0.1676<br>0.0460 0.4984 -0.1295 -0.0031     |
| 776. | (0.00010) | RY*( 5) | C | 40 | s( 14.09%)p 5.49( 77.32%)d 0.61( 8.59%)                                                                                                                                                              |
| 777. | (0.00007) | RY*( 6) | C | 40 | s( 47.62%)p 0.71( 33.79%)d 0.39( 18.59%)                                                                                                                                                             |
| 778. | (0.00002) | RY*( 7) | C | 40 | s( 69.33%)p 0.33( 22.96%)d 0.11( 7.71%)                                                                                                                                                              |
| 779. | (0.00002) | RY*( 8) | C | 40 | s( 0.62%)p86.32( 53.59%)d73.77( 45.79%)                                                                                                                                                              |
| 780. | (0.00003) | RY*( 9) | C | 40 | s( 5.65%)p 8.33( 47.09%)d 8.36( 47.26%)                                                                                                                                                              |
| 781. | (0.00001) | RY*(10) | C | 40 | s( 13.98%)p 3.66( 51.12%)d 2.50( 34.90%)                                                                                                                                                             |
| 782. | (0.00001) | RY*(11) | C | 40 | s( 4.66%)p 1.37( 6.41%)d19.08( 88.93%)                                                                                                                                                               |
| 783. | (0.00000) | RY*(12) | C | 40 | s( 99.25%)p 0.01( 0.69%)d 0.00( 0.07%)                                                                                                                                                               |
| 784. | (0.00000) | RY*(13) | C | 40 | s( 3.98%)p 2.83( 11.27%)d21.31( 84.75%)                                                                                                                                                              |
| 785. | (0.00000) | RY*(14) | C | 40 | s( 4.56%)p 1.36( 6.21%)d19.55( 89.22%)                                                                                                                                                               |
| 786. | (0.00651) | RY*( 1) | C | 41 | s( 5.88%)p14.80( 87.00%)d 1.21( 7.12%)<br>0.0000 0.0079 0.2353 0.0582 0.0016                                                                                                                         |

|      |           |         |   |    |                                          |         |         |         |         |
|------|-----------|---------|---|----|------------------------------------------|---------|---------|---------|---------|
|      |           |         |   |    | 0.0079                                   | 0.4223  | -0.0312 | -0.0168 | -0.7828 |
|      |           |         |   |    | 0.0399                                   | -0.0049 | -0.2749 | 0.0211  | -0.0686 |
|      |           |         |   |    | -0.1235                                  | 0.0703  | -0.1473 | -0.1567 |         |
| 787. | (0.00320) | RY*( 2) | C | 41 | s( 0.33%)p99.99( 95.23%)d13.50( 4.44%)   |         |         |         |         |
|      |           |         |   |    | 0.0000                                   | -0.0021 | 0.0550  | -0.0152 | -0.0045 |
|      |           |         |   |    | 0.0004                                   | -0.7924 | -0.0295 | 0.0009  | -0.4939 |
|      |           |         |   |    | -0.0823                                  | -0.0024 | 0.2675  | -0.0356 | -0.1747 |
|      |           |         |   |    | -0.0789                                  | 0.0252  | 0.0832  | -0.0090 |         |
| 788. | (0.00141) | RY*( 3) | C | 41 | s( 8.69%)p 8.73( 75.84%)d 1.78( 15.47%)  |         |         |         |         |
|      |           |         |   |    | 0.0000                                   | -0.0036 | 0.2789  | 0.0953  | 0.0004  |
|      |           |         |   |    | 0.0021                                   | -0.3207 | -0.2796 | -0.0066 | 0.1316  |
|      |           |         |   |    | 0.3541                                   | 0.0046  | -0.6283 | -0.1996 | 0.1993  |
|      |           |         |   |    | 0.0544                                   | 0.3066  | 0.1278  | 0.0411  |         |
| 789. | (0.00100) | RY*( 4) | C | 41 | s( 33.88%)p 1.43( 48.39%)d 0.52( 17.73%) |         |         |         |         |
|      |           |         |   |    | 0.0000                                   | -0.0043 | 0.5820  | 0.0091  | -0.0019 |
|      |           |         |   |    | 0.0052                                   | 0.0328  | -0.0775 | -0.0017 | 0.0753  |
|      |           |         |   |    | 0.5524                                   | -0.0086 | 0.3022  | 0.2730  | -0.1055 |
|      |           |         |   |    | 0.0259                                   | -0.3840 | -0.0274 | 0.1317  |         |
| 790. | (0.00082) | RY*( 5) | C | 41 | s( 48.71%)p 0.17( 8.48%)d 0.88( 42.81%)  |         |         |         |         |
|      |           |         |   |    | 0.0000                                   | 0.0014  | -0.4201 | 0.5574  | -0.0014 |
|      |           |         |   |    | 0.0065                                   | -0.0294 | -0.1637 | -0.0032 | -0.0499 |
|      |           |         |   |    | 0.2282                                   | -0.0001 | -0.0475 | 0.0148  | -0.0604 |
|      |           |         |   |    | -0.3797                                  | -0.1420 | -0.2663 | 0.4349  |         |
| 791. | (0.00072) | RY*( 6) | C | 41 | s( 32.40%)p 0.61( 19.73%)d 1.48( 47.87%) |         |         |         |         |
|      |           |         |   |    | 0.0000                                   | 0.0000  | -0.2628 | 0.5049  | 0.0009  |
|      |           |         |   |    | -0.0053                                  | -0.0079 | 0.1322  | -0.0067 | -0.0683 |
|      |           |         |   |    | 0.3275                                   | -0.0020 | 0.1318  | 0.2244  | 0.1003  |
|      |           |         |   |    | 0.3272                                   | 0.1008  | 0.2609  | -0.5323 |         |
| 792. | (0.00041) | RY*( 7) | C | 41 | s( 47.56%)p 0.84( 40.04%)d 0.26( 12.40%) |         |         |         |         |
|      |           |         |   |    | 0.0000                                   | 0.0016  | 0.4279  | 0.5408  | 0.0054  |
|      |           |         |   |    | 0.0044                                   | -0.0448 | 0.2935  | 0.0013  | 0.0879  |
|      |           |         |   |    | -0.3456                                  | -0.0037 | 0.0516  | -0.4270 | 0.2186  |
|      |           |         |   |    | 0.0134                                   | -0.2205 | -0.1453 | -0.0795 |         |
| 793. | (0.00039) | RY*( 8) | C | 41 | s( 16.45%)p 3.57( 58.67%)d 1.51( 24.89%) |         |         |         |         |
|      |           |         |   |    | 0.0000                                   | 0.0034  | 0.2473  | 0.3214  | -0.0024 |
|      |           |         |   |    | -0.0088                                  | 0.0614  | -0.3680 | -0.0065 | 0.1544  |
|      |           |         |   |    | -0.4646                                  | 0.0025  | -0.0462 | 0.4534  | -0.2863 |
|      |           |         |   |    | -0.1751                                  | 0.1515  | 0.3366  | -0.0033 |         |
| 794. | (0.00033) | RY*( 9) | C | 41 | s( 1.10%)p70.47( 77.60%)d19.34( 21.30%)  |         |         |         |         |
|      |           |         |   |    | 0.0000                                   | -0.0017 | 0.1044  | -0.0067 | 0.0080  |
|      |           |         |   |    | 0.0081                                   | -0.1697 | 0.6065  | 0.0010  | 0.0144  |
|      |           |         |   |    | -0.0395                                  | 0.0042  | -0.1871 | 0.5853  | 0.2587  |
|      |           |         |   |    | -0.1290                                  | 0.2339  | -0.2017 | 0.1844  |         |
| 795. | (0.00014) | RY*(10) | C | 41 | s( 0.58%)p17.13( 9.85%)d99.99( 89.57%)   |         |         |         |         |
|      |           |         |   |    | 0.0000                                   | -0.0073 | 0.0725  | -0.0149 | 0.0147  |
|      |           |         |   |    | 0.0090                                   | -0.0932 | -0.0843 | -0.0218 | 0.2630  |
|      |           |         |   |    | 0.0833                                   | -0.0051 | 0.0764  | -0.0126 | -0.3249 |
|      |           |         |   |    | -0.2432                                  | 0.2869  | -0.6291 | -0.5029 |         |
| 796. | (0.00010) | RY*(11) | C | 41 | s( 0.28%)p99.99( 40.29%)d99.99( 59.43%)  |         |         |         |         |
| 797. | (0.00005) | RY*(12) | C | 41 | s( 2.60%)p 0.32( 0.83%)d37.17( 96.57%)   |         |         |         |         |
| 798. | (0.00000) | RY*(13) | C | 41 | s( 99.72%)p 0.00( 0.04%)d 0.00( 0.24%)   |         |         |         |         |
| 799. | (0.00502) | RY*( 1) | C | 42 | s( 0.67%)p99.99( 92.55%)d10.07( 6.78%)   |         |         |         |         |
|      |           |         |   |    | 0.0000                                   | 0.0021  | 0.0561  | 0.0597  | -0.0033 |
|      |           |         |   |    | 0.0129                                   | -0.5020 | 0.0126  | -0.0091 | 0.3133  |
|      |           |         |   |    | -0.0229                                  | 0.0198  | -0.7576 | -0.0056 | -0.1290 |
|      |           |         |   |    | 0.0543                                   | -0.1935 | 0.0543  | -0.0881 |         |
| 800. | (0.00306) | RY*( 2) | C | 42 | s( 2.84%)p30.97( 87.97%)d 3.23( 9.19%)   |         |         |         |         |
|      |           |         |   |    | 0.0000                                   | -0.0019 | 0.1603  | -0.0520 | 0.0017  |
|      |           |         |   |    | 0.0023                                   | 0.0749  | -0.0068 | 0.0002  | 0.8812  |
|      |           |         |   |    | 0.0619                                   | 0.0026  | 0.3040  | -0.0356 | 0.1123  |
|      |           |         |   |    | 0.1884                                   | 0.0329  | 0.1635  | 0.1262  |         |
| 801. | (0.00236) | RY*( 3) | C | 42 | s( 6.70%)p12.43( 83.31%)d 1.49( 9.99%)   |         |         |         |         |
|      |           |         |   |    | 0.0000                                   | 0.0021  | 0.2563  | 0.0359  | 0.0048  |
|      |           |         |   |    | -0.0004                                  | -0.7481 | -0.0434 | 0.0045  | -0.1261 |
|      |           |         |   |    | -0.1379                                  | 0.0027  | 0.4795  | 0.0817  | 0.1016  |
|      |           |         |   |    | 0.0095                                   | -0.2127 | -0.1722 | 0.1208  |         |
| 802. | (0.00137) | RY*( 4) | C | 42 | s( 87.22%)p 0.13( 11.67%)d 0.01( 1.11%)  |         |         |         |         |
|      |           |         |   |    | 0.0000                                   | -0.0032 | 0.9289  | -0.0962 | -0.0051 |
|      |           |         |   |    | -0.0028                                  | 0.2128  | 0.0186  | 0.0072  | -0.1317 |
|      |           |         |   |    | 0.1194                                   | -0.0087 | -0.1510 | 0.1286  | 0.0046  |
|      |           |         |   |    | 0.0154                                   | 0.0654  | -0.0482 | -0.0651 |         |

|      |           |         |   |    |                                                                                                                                                                                                      |
|------|-----------|---------|---|----|------------------------------------------------------------------------------------------------------------------------------------------------------------------------------------------------------|
| 803. | (0.00065) | RY*( 5) | C | 42 | s( 4.31%)p 5.56( 23.98%)d16.62( 71.70%)<br>0.0000 -0.0041 0.1415 0.1516 0.0106<br>-0.0084 0.0197 0.2782 0.0054 0.0582<br>-0.3177 0.0067 0.0721 -0.2290 -0.5432<br>-0.5074 0.0415 0.2261 0.3342       |
| 804. | (0.00050) | RY*( 6) | C | 42 | s( 16.49%)p 4.06( 66.92%)d 1.01( 16.59%)<br>0.0000 -0.0013 -0.0023 0.4056 0.0205<br>-0.0020 0.0870 0.3418 -0.0002 0.0381<br>-0.5158 0.0067 0.0438 0.5247 0.0643<br>0.1796 0.0515 0.1244 -0.3337      |
| 805. | (0.00042) | RY*( 7) | C | 42 | s( 2.63%)p21.99( 57.85%)d15.02( 39.52%)<br>0.0000 0.0067 -0.0855 0.1376 -0.0026<br>0.0054 -0.0099 0.1673 -0.0161 -0.0804<br>0.4644 -0.0073 -0.0647 0.5691 0.0566<br>-0.0492 -0.1263 0.2550 0.5555    |
| 806. | (0.00033) | RY*( 8) | C | 42 | s( 68.01%)p 0.35( 23.55%)d 0.12( 8.45%)<br>0.0000 0.0015 0.1024 0.8179 -0.0250<br>-0.0007 0.1323 -0.3613 0.0062 -0.0210<br>0.0442 -0.0072 -0.0437 -0.2881 0.2032<br>0.0180 -0.1494 -0.0373 0.1384    |
| 807. | (0.00024) | RY*( 9) | C | 42 | s( 1.29%)p15.64( 20.23%)d60.67( 78.47%)<br>0.0000 0.0028 0.0403 0.1063 -0.0035<br>-0.0170 -0.2698 -0.1523 -0.0073 -0.1701<br>0.2270 0.0023 0.1094 -0.1164 -0.1482<br>0.1982 0.4584 0.6768 -0.2353    |
| 808. | (0.00013) | RY*(10) | C | 42 | s( 2.19%)p 4.03( 8.83%)d40.58( 88.97%)<br>0.0000 -0.0004 -0.0293 0.1447 -0.0109<br>-0.0070 -0.1844 0.0095 0.0049 0.1477<br>0.0706 -0.0079 -0.0993 0.1322 0.2081<br>-0.3574 0.7553 -0.3800 0.0622     |
| 809. | (0.00012) | RY*(11) | C | 42 | s( 3.52%)p 9.29( 32.70%)d18.12( 63.78%)<br>0.0000 0.0055 -0.0357 0.1837 -0.0114<br>-0.0009 0.0072 -0.1017 0.0141 0.1637<br>0.4419 0.0107 0.2076 0.2262 -0.4255<br>-0.3283 -0.2080 -0.1857 -0.5208    |
| 810. | (0.00007) | RY*(12) | C | 42 | s( 3.33%)p26.31( 87.69%)d 2.69( 8.98%)                                                                                                                                                               |
| 811. | (0.00004) | RY*(13) | C | 42 | s( 1.23%)p 2.24( 2.76%)d78.12( 96.02%)                                                                                                                                                               |
| 812. | (0.00000) | RY*(14) | C | 42 | s( 99.59%)p 0.00( 0.12%)d 0.00( 0.29%)                                                                                                                                                               |
| 813. | (0.00409) | RY*( 1) | C | 43 | s( 1.68%)p53.23( 89.18%)d 5.46( 9.15%)<br>0.0000 0.0056 0.1292 -0.0045 0.0028<br>0.0065 0.1931 -0.0591 0.0072 0.3803<br>0.1272 0.0229 0.8304 -0.0052 0.1720<br>0.0065 0.1764 0.0224 0.1738           |
| 814. | (0.00153) | RY*( 2) | C | 43 | s( 0.24%)p99.99( 96.65%)d13.20( 3.12%)<br>0.0000 0.0047 0.0469 -0.0101 0.0064<br>0.0154 0.2250 -0.1894 -0.0121 0.8200<br>-0.0722 0.0005 -0.4324 0.1231 0.0904<br>0.1224 -0.0591 -0.0450 -0.0498      |
| 815. | (0.00136) | RY*( 3) | C | 43 | s( 0.02%)p99.99( 96.34%)d99.99( 3.64%)<br>0.0000 0.0039 0.0062 0.0091 0.0055<br>0.0106 -0.8822 0.1356 -0.0209 0.3501<br>0.1957 0.0068 0.0437 -0.0580 -0.1497<br>-0.0314 -0.0198 0.0962 0.0584        |
| 816. | (0.00060) | RY*( 4) | C | 43 | s( 92.59%)p 0.05( 4.74%)d 0.03( 2.67%)<br>0.0000 -0.0002 0.9520 -0.1396 -0.0064<br>-0.0123 -0.0228 -0.1041 0.0041 -0.1127<br>0.0964 -0.0182 -0.0990 -0.0611 0.0107<br>0.0272 -0.0782 0.1389 -0.0219  |
| 817. | (0.00047) | RY*( 5) | C | 43 | s( 0.28%)p22.99( 6.33%)d99.99( 93.40%)<br>0.0000 0.0008 0.0480 -0.0194 -0.0085<br>-0.0061 -0.1761 -0.1493 -0.0049 -0.0727<br>0.0081 0.0030 0.0566 0.0367 0.3784<br>0.0244 -0.4414 -0.7543 0.1624     |
| 818. | (0.00015) | RY*( 6) | C | 43 | s( 7.91%)p 5.73( 45.33%)d 5.91( 46.76%)<br>0.0000 -0.0072 0.2023 0.1933 -0.0277<br>0.0081 -0.0585 0.2357 -0.0163 0.1095<br>-0.5708 -0.0056 -0.0175 -0.2365 -0.0441<br>-0.4044 0.4195 -0.3490 -0.0655 |
| 819. | (0.00012) | RY*( 7) | C | 43 | s( 2.81%)p15.50( 43.49%)d19.14( 53.71%)<br>0.0000 -0.0090 0.0733 0.1490 0.0201<br>-0.0103 0.1013 0.4708 0.0101 0.0859                                                                                |

|      |           |         |   |    |            |                 |                 |         |         |
|------|-----------|---------|---|----|------------|-----------------|-----------------|---------|---------|
|      |           |         |   |    | -0.4214    | -0.0093         | 0.1301          | -0.0283 | -0.2406 |
|      |           |         |   |    | 0.2667     | -0.5582         | 0.1523          | 0.2708  |         |
| 820. | (0.00007) | RY*( 8) | C | 43 | s( 8.40%)  | p 6.96( 58.46%) | d 3.95( 33.15%) |         |         |
| 821. | (0.00006) | RY*( 9) | C | 43 | s( 6.28%)  | p13.93( 87.46%) | d 1.00( 6.27%)  |         |         |
| 822. | (0.00005) | RY*(10) | C | 43 | s( 13.19%) | p 1.19( 15.66%) | d 5.40( 71.15%) |         |         |
| 823. | (0.00002) | RY*(11) | C | 43 | s( 66.65%) | p 0.20( 13.54%) | d 0.30( 19.81%) |         |         |
| 824. | (0.00002) | RY*(12) | C | 43 | s( 1.33%)  | p23.71( 31.42%) | d50.75( 67.25%) |         |         |
| 825. | (0.00002) | RY*(13) | C | 43 | s( 2.08%)  | p 5.38( 11.18%) | d41.77( 86.75%) |         |         |
| 826. | (0.00000) | RY*(14) | C | 43 | s( 96.61%) | p 0.00( 0.39%)  | d 0.03( 3.00%)  |         |         |
| 827. | (0.00417) | RY*( 1) | C | 44 | s( 0.90%)  | p99.99( 91.01%) | d 9.00( 8.09%)  |         |         |
|      |           |         |   |    | 0.0000     | 0.0007          | 0.0821          | 0.0471  | 0.0059  |
|      |           |         |   |    | -0.0114    | -0.3280         | 0.0179          | 0.0292  | 0.8707  |
|      |           |         |   |    | -0.0564    | 0.0081          | 0.1994          | -0.0092 | -0.0770 |
|      |           |         |   |    | -0.1534    | 0.0616          | -0.1314         | -0.1743 |         |
| 828. | (0.00187) | RY*( 2) | C | 44 | s( 0.05%)  | p99.99( 99.95%) | d 0.09( 0.00%)  |         |         |
|      |           |         |   |    | 0.0000     | -0.0002         | 0.0193          | 0.0090  | 0.0007  |
|      |           |         |   |    | -0.0196    | 0.4821          | 0.1537          | 0.0008  | -0.0088 |
|      |           |         |   |    | -0.0115    | -0.0344         | 0.8157          | 0.2762  | 0.0017  |
|      |           |         |   |    | -0.0018    | 0.0009          | -0.0049         | 0.0033  |         |
| 829. | (0.00089) | RY*( 3) | C | 44 | s( 0.25%)  | p99.99( 91.27%) | d34.04( 8.49%)  |         |         |
|      |           |         |   |    | 0.0000     | 0.0014          | 0.0361          | 0.0345  | -0.0016 |
|      |           |         |   |    | 0.0057     | 0.7342          | -0.1664         | 0.0014  | 0.3734  |
|      |           |         |   |    | -0.0821    | -0.0025         | -0.4353         | 0.1011  | 0.1796  |
|      |           |         |   |    | 0.1509     | -0.0367         | -0.1174         | -0.1213 |         |
| 830. | (0.00051) | RY*( 4) | C | 44 | s( 98.54%) | p 0.01( 1.35%)  | d 0.00( 0.11%)  |         |         |
|      |           |         |   |    | 0.0000     | -0.0013         | 0.9833          | 0.1357  | 0.0058  |
|      |           |         |   |    | 0.0057     | -0.0107         | 0.0204          | -0.0158 | -0.0837 |
|      |           |         |   |    | 0.0710     | -0.0035         | -0.0244         | 0.0065  | -0.0012 |
|      |           |         |   |    | 0.0143     | -0.0011         | 0.0211          | 0.0215  |         |
| 831. | (0.00051) | RY*( 5) | C | 44 | s( 0.12%)  | p11.67( 1.38%)  | d99.99( 98.50%) |         |         |
|      |           |         |   |    | 0.0000     | 0.0006          | -0.0003         | 0.0341  | -0.0041 |
|      |           |         |   |    | 0.0076     | 0.0885          | -0.0316         | 0.0043  | 0.0464  |
|      |           |         |   |    | 0.0077     | -0.0043         | -0.0514         | -0.0005 | -0.1609 |
|      |           |         |   |    | -0.4425    | -0.3922         | -0.4267         | 0.6538  |         |
| 832. | (0.00020) | RY*( 6) | C | 44 | s( 0.08%)  | p99.99( 33.81%) | d99.99( 66.12%) |         |         |
|      |           |         |   |    | 0.0000     | 0.0017          | 0.0059          | 0.0266  | -0.0040 |
|      |           |         |   |    | -0.0165    | 0.0893          | -0.2932         | 0.0014  | 0.0055  |
|      |           |         |   |    | 0.0599     | -0.0285         | 0.1549          | -0.4642 | 0.3904  |
|      |           |         |   |    | -0.1528    | 0.6276          | -0.1044         | 0.2840  |         |
| 833. | (0.00008) | RY*( 7) | C | 44 | s( 41.20%) | p 1.33( 54.63%) | d 0.10( 4.17%)  |         |         |
| 834. | (0.00007) | RY*( 8) | C | 44 | s( 7.39%)  | p 8.92( 65.87%) | d 3.62( 26.74%) |         |         |
| 835. | (0.00004) | RY*( 9) | C | 44 | s( 0.08%)  | p99.99( 63.70%) | d99.99( 36.22%) |         |         |
| 836. | (0.00004) | RY*(10) | C | 44 | s( 1.29%)  | p19.75( 25.49%) | d56.75( 73.22%) |         |         |
| 837. | (0.00001) | RY*(11) | C | 44 | s( 48.03%) | p 0.84( 40.34%) | d 0.24( 11.64%) |         |         |
| 838. | (0.00000) | RY*(12) | C | 44 | s( 98.37%) | p 0.01( 0.61%)  | d 0.01( 1.02%)  |         |         |
| 839. | (0.00000) | RY*(13) | C | 44 | s( 0.20%)  | p78.03( 15.42%) | d99.99( 84.38%) |         |         |
| 840. | (0.00000) | RY*(14) | C | 44 | s( 3.58%)  | p 4.28( 15.32%) | d22.68( 81.10%) |         |         |
| 841. | (0.00417) | RY*( 1) | C | 45 | s( 1.43%)  | p62.69( 89.66%) | d 6.23( 8.91%)  |         |         |
|      |           |         |   |    | 0.0000     | 0.0053          | 0.1182          | -0.0167 | 0.0039  |
|      |           |         |   |    | -0.0151    | -0.5625         | -0.0287         | 0.0101  | 0.4208  |
|      |           |         |   |    | 0.1189     | -0.0174         | -0.6196         | 0.0598  | -0.0762 |
|      |           |         |   |    | 0.1114     | -0.2438         | 0.1055          | -0.0182 |         |
| 842. | (0.00144) | RY*( 2) | C | 45 | s( 0.30%)  | p99.99( 98.57%) | d 3.75( 1.13%)  |         |         |
|      |           |         |   |    | 0.0000     | 0.0074          | 0.0535          | 0.0030  | 0.0083  |
|      |           |         |   |    | 0.0043     | 0.0071          | -0.0731         | -0.0226 | 0.8154  |
|      |           |         |   |    | 0.0686     | -0.0182         | 0.5562          | 0.0237  | 0.0441  |
|      |           |         |   |    | 0.0359     | 0.0447          | -0.0089         | 0.0772  |         |
| 843. | (0.00134) | RY*( 3) | C | 45 | s( 0.05%)  | p99.99( 92.47%) | d99.99( 7.48%)  |         |         |
|      |           |         |   |    | 0.0000     | -0.0001         | 0.0225          | 0.0013  | 0.0008  |
|      |           |         |   |    | 0.0121     | 0.7149          | -0.2526         | 0.0088  | 0.2859  |
|      |           |         |   |    | -0.1745    | -0.0031         | -0.4569         | 0.1693  | 0.1251  |
|      |           |         |   |    | 0.0276     | -0.1167         | -0.2111         | 0.0143  |         |
| 844. | (0.00061) | RY*( 4) | C | 45 | s( 93.70%) | p 0.04( 3.85%)  | d 0.03( 2.45%)  |         |         |
|      |           |         |   |    | 0.0000     | -0.0008         | 0.9598          | -0.1251 | -0.0048 |
|      |           |         |   |    | 0.0088     | 0.0674          | 0.0830          | 0.0031  | -0.1055 |
|      |           |         |   |    | 0.0454     | 0.0222          | 0.0458          | 0.1061  | 0.0879  |
|      |           |         |   |    | -0.0481    | 0.0310          | 0.0714          | 0.0916  |         |
| 845. | (0.00049) | RY*( 5) | C | 45 | s( 0.19%)  | p33.10( 6.26%)  | d99.99( 93.55%) |         |         |
|      |           |         |   |    | 0.0000     | 0.0005          | 0.0416          | -0.0101 | -0.0079 |
|      |           |         |   |    | 0.0071     | -0.1613         | -0.0866         | 0.0030  | -0.0858 |
|      |           |         |   |    | -0.0372    | -0.0033         | 0.1063          | 0.0947  | 0.5591  |



|      |           |         |   |    |                                                                                                                                                                                                                                       |
|------|-----------|---------|---|----|---------------------------------------------------------------------------------------------------------------------------------------------------------------------------------------------------------------------------------------|
| 846. | (0.00015) | RY*( 6) | C | 45 | 0.5137 -0.0378 -0.2930 -0.5213<br>s( 2.43%)p11.78( 28.60%)d28.41( 68.97%)<br>0.0000 -0.0059 0.1359 0.0750 -0.0125<br>0.0066 -0.0344 0.1662 -0.0190 0.0741<br>-0.4907 -0.0093 0.1015 0.0138 -0.5021<br>-0.1905 -0.2364 -0.2321 -0.5399 |
| 847. | (0.00010) | RY*( 7) | C | 45 | s( 8.48%)p 8.40( 71.20%)d 2.40( 20.32%)                                                                                                                                                                                               |
| 848. | (0.00008) | RY*( 8) | C | 45 | s( 3.67%)p20.43( 74.95%)d 5.83( 21.38%)                                                                                                                                                                                               |
| 849. | (0.00005) | RY*( 9) | C | 45 | s( 1.91%)p18.19( 34.70%)d33.24( 63.40%)                                                                                                                                                                                               |
| 850. | (0.00006) | RY*(10) | C | 45 | s( 46.36%)p 0.59( 27.24%)d 0.57( 26.40%)                                                                                                                                                                                              |
| 851. | (0.00002) | RY*(11) | C | 45 | s( 1.11%)p24.38( 27.07%)d64.69( 71.82%)                                                                                                                                                                                               |
| 852. | (0.00002) | RY*(12) | C | 45 | s( 36.32%)p 0.81( 29.32%)d 0.95( 34.36%)                                                                                                                                                                                              |
| 853. | (0.00001) | RY*(13) | C | 45 | s( 6.71%)p 2.40( 16.12%)d11.49( 77.17%)                                                                                                                                                                                               |
| 854. | (0.00000) | RY*(14) | C | 45 | s( 97.38%)p 0.00( 0.13%)d 0.03( 2.49%)                                                                                                                                                                                                |
| 855. | (0.00513) | RY*( 1) | C | 46 | s( 0.59%)p99.99( 92.46%)d11.68( 6.95%)<br>0.0000 0.0008 0.0028 0.0770 -0.0034<br>-0.0103 0.3985 -0.0093 -0.0068 0.1200<br>-0.0139 -0.0216 0.8660 -0.0214 0.1092<br>-0.0499 0.2142 -0.0538 0.0792                                      |
| 856. | (0.00295) | RY*( 2) | C | 46 | s( 4.53%)p19.27( 87.27%)d 1.81( 8.20%)<br>0.0000 -0.0005 0.2128 -0.0002 0.0056<br>-0.0047 -0.2665 0.0292 0.0020 0.8947<br>0.0191 -0.0039 0.0009 0.0057 0.0894<br>0.1064 -0.0803 0.1085 0.2108                                         |
| 857. | (0.00289) | RY*( 3) | C | 46 | s( 0.12%)p99.99( 91.04%)d74.00( 8.84%)<br>0.0000 0.0024 0.0344 -0.0027 0.0010<br>-0.0037 -0.8188 -0.0944 0.0008 -0.2471<br>-0.0422 0.0007 0.4090 0.0308 0.1293<br>0.1789 0.0639 0.0819 -0.1698                                        |
| 858. | (0.00146) | RY*( 4) | C | 46 | s( 93.19%)p 0.05( 4.68%)d 0.02( 2.13%)<br>0.0000 -0.0036 0.9636 -0.0578 -0.0046<br>0.0036 0.0905 -0.0185 0.0102 -0.1757<br>0.0811 0.0076 -0.0043 0.0248 -0.0007<br>0.0028 -0.0390 -0.1214 -0.0712                                     |
| 859. | (0.00067) | RY*( 5) | C | 46 | s( 1.21%)p10.85( 13.12%)d70.87( 85.67%)<br>0.0000 -0.0030 0.1044 0.0342 0.0030<br>0.0113 0.0737 0.2571 0.0129 0.0698<br>-0.2283 -0.0062 -0.0483 0.0011 -0.3126<br>0.0305 0.4635 0.6428 -0.3606                                        |
| 860. | (0.00052) | RY*( 6) | C | 46 | s( 49.12%)p 0.86( 42.45%)d 0.17( 8.44%)<br>0.0000 0.0008 0.0916 0.6948 0.0100<br>-0.0090 -0.0915 -0.1803 0.0038 -0.0131<br>-0.4390 0.0039 -0.0623 -0.4321 -0.0459<br>-0.2524 0.0031 -0.0772 0.1121                                    |
| 861. | (0.00049) | RY*( 7) | C | 46 | s( 6.60%)p 9.94( 65.62%)d 4.21( 27.78%)<br>0.0000 0.0060 0.0037 0.2568 -0.0033<br>0.0097 0.0855 -0.3849 -0.0130 -0.0909<br>0.6503 -0.0023 -0.0326 -0.2613 0.0902<br>0.1734 -0.0013 0.4740 0.1223                                      |
| 862. | (0.00029) | RY*( 8) | C | 46 | s( 32.11%)p 1.81( 58.18%)d 0.30( 9.70%)<br>0.0000 -0.0012 0.0186 0.5660 -0.0197<br>0.0034 0.0367 0.2350 -0.0012 -0.1022<br>0.0127 0.0061 -0.0185 0.7171 0.0978<br>0.1745 -0.1087 0.1036 0.1857                                        |
| 863. | (0.00020) | RY*( 9) | C | 46 | s( 4.24%)p 1.86( 7.90%)d20.74( 87.87%)<br>0.0000 0.0003 -0.0478 0.2002 -0.0024<br>0.0090 0.1673 0.0075 0.0082 0.1456<br>-0.0185 -0.0066 -0.1282 -0.1129 0.4961<br>0.4185 0.0613 -0.2343 -0.6315                                       |
| 864. | (0.00012) | RY*(10) | C | 46 | s( 7.89%)p 4.25( 33.53%)d 7.43( 58.58%)<br>0.0000 -0.0016 -0.0503 0.2763 -0.0043<br>-0.0049 -0.1381 0.1637 0.0120 0.1677<br>0.5004 0.0082 0.0973 0.0346 -0.4943<br>-0.2772 -0.0296 -0.3205 -0.4012                                    |
| 865. | (0.00013) | RY*(11) | C | 46 | s( 0.06%)p99.99( 13.51%)d99.99( 86.42%)<br>0.0000 0.0026 0.0156 0.0188 0.0056<br>-0.0096 -0.1407 0.1286 0.0078 -0.0138<br>0.2297 -0.0090 -0.2071 0.0521 0.3747<br>-0.3299 0.7330 -0.1858 0.2077                                       |
| 866. | (0.00009) | RY*(12) | C | 46 | s( 0.18%)p99.99( 88.64%)d62.84( 11.19%)                                                                                                                                                                                               |
| 867. | (0.00004) | RY*(13) | C | 46 | s( 0.88%)p 1.89( 1.66%)d99.99( 97.46%)                                                                                                                                                                                                |

|      |           |         |   |    |                                                                                                                                                                                                       |
|------|-----------|---------|---|----|-------------------------------------------------------------------------------------------------------------------------------------------------------------------------------------------------------|
| 868. | (0.00000) | RY*(14) | C | 46 | s( 99.31%)p 0.00( 0.09%)d 0.01( 0.60%)                                                                                                                                                                |
| 869. | (0.00368) | RY*( 1) | C | 47 | s( 3.26%)p27.42( 89.38%)d 2.26( 7.36%)<br>0.0000 0.0044 0.1686 0.0641 0.0056<br>0.0114 0.3203 -0.0017 -0.0171 -0.7473<br>0.0508 -0.0185 -0.4784 -0.0236 -0.1828<br>-0.1742 0.0778 -0.0397 -0.0465     |
| 870. | (0.00178) | RY*( 2) | C | 47 | s( 1.73%)p49.16( 84.84%)d 7.78( 13.43%)<br>0.0000 0.0081 0.1088 0.0727 -0.0081<br>0.0054 0.6638 -0.0790 -0.0017 -0.0729<br>-0.0066 0.0023 0.6240 0.0822 0.1647<br>-0.0809 0.2569 0.0463 -0.1804       |
| 871. | (0.00140) | RY*( 3) | C | 47 | s( 5.62%)p14.14( 79.52%)d 2.64( 14.85%)<br>0.0000 0.0005 0.2278 0.0658 -0.0021<br>0.0013 0.4694 -0.0873 -0.0048 0.5747<br>-0.0757 -0.0065 -0.4807 -0.0110 -0.1880<br>0.2029 0.2353 0.0525 0.1179      |
| 872. | (0.00067) | RY*( 4) | C | 47 | s( 29.33%)p 1.80( 52.91%)d 0.61( 17.76%)<br>0.0000 0.0009 0.4852 0.2369 -0.0415<br>0.0118 -0.2778 0.3842 -0.0069 0.0046<br>-0.4480 -0.0086 0.0620 0.3154 0.0069<br>-0.2593 0.2854 0.1097 0.1298       |
| 873. | (0.00059) | RY*( 5) | C | 47 | s( 3.11%)p22.96( 71.45%)d 8.17( 25.44%)<br>0.0000 0.0027 0.0968 0.1474 -0.0059<br>-0.0045 0.1378 0.5300 -0.0085 0.1446<br>0.6227 0.0040 0.0109 0.0754 0.0726<br>-0.2095 -0.1463 -0.3513 0.2457        |
| 874. | (0.00042) | RY*( 6) | C | 47 | s( 26.93%)p 1.57( 42.24%)d 1.14( 30.83%)<br>0.0000 -0.0005 0.5139 0.0626 0.0364<br>0.0038 -0.2329 -0.2202 -0.0016 -0.0344<br>0.5520 -0.0077 0.0774 -0.0876 -0.0177<br>0.1474 0.0589 0.5274 -0.0684    |
| 875. | (0.00029) | RY*( 7) | C | 47 | s( 3.09%)p11.37( 35.19%)d19.95( 61.72%)<br>0.0000 0.0028 -0.0533 0.1582 0.0553<br>-0.0126 0.1074 -0.3229 0.0066 -0.1060<br>-0.0307 -0.0061 0.1586 0.4456 -0.2475<br>0.0667 -0.3392 0.1134 0.6508      |
| 876. | (0.00030) | RY*( 8) | C | 47 | s( 25.69%)p 1.24( 31.98%)d 1.65( 42.32%)<br>0.0000 -0.0006 0.4575 -0.2171 -0.0208<br>0.0083 -0.1118 -0.4845 -0.0093 0.0600<br>-0.0536 -0.0037 0.0843 -0.2427 0.0520<br>-0.2848 -0.0125 -0.5592 0.1631 |
| 877. | (0.00023) | RY*( 9) | C | 47 | s( 17.68%)p 2.40( 42.42%)d 2.26( 39.90%)<br>0.0000 0.0019 0.0234 0.4195 0.0178<br>-0.0056 -0.0581 -0.3108 0.0029 0.0940<br>0.0701 0.0106 -0.2175 0.5128 0.3253<br>-0.0422 -0.1937 -0.1950 -0.4646     |
| 878. | (0.00013) | RY*(10) | C | 47 | s( 8.72%)p 0.99( 8.62%)d 9.47( 82.65%)<br>0.0000 -0.0002 0.1247 0.2673 0.0162<br>0.0061 -0.1260 0.0850 0.0171 -0.1580<br>0.0012 -0.0138 0.1939 -0.0083 -0.3392<br>0.6888 0.1554 -0.4504 -0.1007       |
| 879. | (0.00011) | RY*(11) | C | 47 | s( 59.19%)p 0.59( 34.75%)d 0.10( 6.06%)<br>0.0000 -0.0039 -0.1327 0.7578 0.0034<br>-0.0024 -0.0094 -0.0949 -0.0006 0.0182<br>-0.1016 0.0075 0.0254 -0.5719 0.0925<br>-0.1432 -0.0478 0.0727 0.1549    |
| 880. | (0.00011) | RY*(12) | C | 47 | s( 10.61%)p 1.52( 16.10%)d 6.91( 73.29%)<br>0.0000 0.0005 0.3237 -0.0252 0.0264<br>-0.0140 0.1704 0.2000 -0.0063 0.0851<br>-0.2270 -0.0147 0.0961 -0.1532 -0.2866<br>-0.0186 -0.7357 0.0843 -0.3195   |
| 881. | (0.00003) | RY*(13) | C | 47 | s( 5.74%)p 1.84( 10.57%)d14.58( 83.69%)                                                                                                                                                               |
| 882. | (0.00000) | RY*(14) | C | 47 | s( 99.24%)p 0.00( 0.26%)d 0.01( 0.50%)                                                                                                                                                                |
| 883. | (0.00153) | RY*( 1) | C | 48 | s( 7.84%)p 9.32( 73.02%)d 2.44( 19.14%)<br>0.0000 0.0016 -0.1826 0.2121 -0.0069<br>0.0005 -0.3424 -0.1236 -0.0046 -0.5815<br>-0.0798 -0.0146 -0.5026 0.0177 0.2701<br>0.1443 0.0279 -0.0712 -0.3029   |
| 884. | (0.00099) | RY*( 2) | C | 48 | s( 0.29%)p99.99( 72.12%)d95.79( 27.59%)<br>0.0000 0.0009 -0.0356 0.0402 -0.0002<br>0.0126 0.6201 -0.0647 -0.0076 -0.5275                                                                              |

|      |           |         |   |    |            |                 |                 |         |         |
|------|-----------|---------|---|----|------------|-----------------|-----------------|---------|---------|
|      |           |         |   |    | 0.0443     | 0.0048          | 0.2225          | 0.0505  | -0.0520 |
|      |           |         |   |    | 0.2409     | -0.3050         | -0.3257         | 0.1267  |         |
| 885. | (0.00029) | RY*( 3) | C | 48 | s( 16.79%) | p 4.86( 81.62%) | d 0.09( 1.59%)  |         |         |
|      |           |         |   |    | 0.0000     | 0.0040          | -0.2142         | 0.3492  | -0.0039 |
|      |           |         |   |    | 0.0089     | -0.4128         | -0.3349         | 0.0047  | -0.1124 |
|      |           |         |   |    | -0.1753    | -0.0043         | 0.6554          | 0.2463  | -0.0529 |
|      |           |         |   |    | -0.0391    | -0.0461         | 0.0472          | 0.0847  |         |
| 886. | (0.00011) | RY*( 4) | C | 48 | s( 31.01%) | p 1.61( 49.82%) | d 0.62( 19.18%) |         |         |
|      |           |         |   |    | 0.0000     | 0.0034          | -0.2577         | 0.4936  | -0.0014 |
|      |           |         |   |    | -0.0077    | 0.4014          | 0.4346          | 0.0023  | 0.0889  |
|      |           |         |   |    | -0.3316    | -0.0026         | 0.0270          | 0.1717  | 0.1861  |
|      |           |         |   |    | -0.1675    | 0.2892          | 0.1331          | -0.1665 |         |
| 887. | (0.00012) | RY*( 5) | C | 48 | s( 11.53%) | p 7.21( 83.16%) | d 0.46( 5.31%)  |         |         |
|      |           |         |   |    | 0.0000     | -0.0172         | 0.0485          | 0.3241  | 0.0876  |
|      |           |         |   |    | 0.0002     | -0.1399         | 0.2772          | -0.0020 | -0.1596 |
|      |           |         |   |    | 0.0999     | 0.0015          | 0.1885          | -0.8150 | -0.1282 |
|      |           |         |   |    | 0.1269     | 0.0818          | 0.0639          | 0.0989  |         |
| 888. | (0.00007) | RY*( 6) | C | 48 | s( 25.60%) | p 1.87( 47.80%) | d 1.04( 26.60%) |         |         |
| 889. | (0.00004) | RY*( 7) | C | 48 | s( 16.12%) | p 2.55( 41.05%) | d 2.66( 42.83%) |         |         |
| 890. | (0.00003) | RY*( 8) | C | 48 | s( 71.48%) | p 0.30( 21.49%) | d 0.10( 7.03%)  |         |         |
| 891. | (0.00002) | RY*( 9) | C | 48 | s( 7.05%)  | p 8.15( 57.43%) | d 5.04( 35.52%) |         |         |
| 892. | (0.00000) | RY*(10) | C | 48 | s( 99.18%) | p 0.01( 0.80%)  | d 0.00( 0.02%)  |         |         |
| 893. | (0.00001) | RY*(11) | C | 48 | s( 4.86%)  | p 8.20( 39.82%) | d11.39( 55.33%) |         |         |
| 894. | (0.00001) | RY*(12) | C | 48 | s( 6.40%)  | p 1.68( 10.72%) | d12.96( 82.88%) |         |         |
| 895. | (0.00001) | RY*(13) | C | 48 | s( 1.31%)  | p11.68( 15.27%) | d63.83( 83.42%) |         |         |
| 896. | (0.00000) | RY*(14) | C | 48 | s( 0.56%)  | p10.79( 6.06%)  | d99.99( 93.38%) |         |         |
| 897. | (0.00367) | RY*( 1) | C | 49 | s( 2.72%)  | p32.92( 89.61%) | d 2.82( 7.66%)  |         |         |
|      |           |         |   |    | 0.0000     | 0.0050          | 0.1621          | 0.0300  | 0.0044  |
|      |           |         |   |    | 0.0161     | 0.4891          | -0.0108         | -0.0245 | -0.8037 |
|      |           |         |   |    | 0.0700     | 0.0052          | 0.0517          | 0.0484  | -0.1794 |
|      |           |         |   |    | -0.0140    | 0.0864          | -0.1576         | -0.1093 |         |
| 898. | (0.00133) | RY*( 2) | C | 49 | s( 0.46%)  | p99.99( 80.08%) | d42.77( 19.46%) |         |         |
|      |           |         |   |    | 0.0000     | 0.0081          | 0.0026          | 0.0668  | 0.0035  |
|      |           |         |   |    | 0.0019     | -0.3569         | -0.0730         | -0.0069 | -0.2436 |
|      |           |         |   |    | -0.0896    | -0.0064         | -0.7562         | -0.1698 | -0.0348 |
|      |           |         |   |    | -0.2950    | -0.1552         | -0.0040         | -0.2868 |         |
| 899. | (0.00128) | RY*( 3) | C | 49 | s( 0.19%)  | p99.99( 84.81%) | d78.93( 15.00%) |         |         |
|      |           |         |   |    | 0.0000     | 0.0013          | 0.0407          | 0.0154  | 0.0015  |
|      |           |         |   |    | -0.0013    | 0.6688          | -0.1938         | -0.0002 | 0.3913  |
|      |           |         |   |    | -0.1225    | -0.0002         | -0.4296         | 0.1031  | -0.0821 |
|      |           |         |   |    | -0.1433    | -0.1662         | -0.1827         | 0.2484  |         |
| 900. | (0.00068) | RY*( 4) | C | 49 | s( 0.47%)  | p99.99( 62.30%) | d80.04( 37.23%) |         |         |
|      |           |         |   |    | 0.0000     | -0.0011         | 0.0665          | -0.0153 | 0.0005  |
|      |           |         |   |    | 0.0123     | -0.3187         | -0.4962         | 0.0061  | -0.1652 |
|      |           |         |   |    | -0.2450    | -0.0057         | 0.1812          | 0.3935  | -0.2849 |
|      |           |         |   |    | -0.3090    | -0.0973         | 0.0242          | 0.4308  |         |
| 901. | (0.00050) | RY*( 5) | C | 49 | s( 54.24%) | p 0.30( 16.24%) | d 0.54( 29.52%) |         |         |
|      |           |         |   |    | 0.0000     | 0.0041          | 0.7303          | 0.0947  | -0.0064 |
|      |           |         |   |    | 0.0112     | -0.0875         | -0.1680         | -0.0161 | 0.1511  |
|      |           |         |   |    | -0.0086    | 0.0019          | 0.0788          | -0.3116 | -0.3416 |
|      |           |         |   |    | 0.3174     | -0.2518         | -0.0279         | -0.1166 |         |
| 902. | (0.00034) | RY*( 6) | C | 49 | s( 10.53%) | p 7.64( 80.42%) | d 0.86( 9.04%)  |         |         |
|      |           |         |   |    | 0.0000     | -0.0033         | 0.3045          | -0.1096 | 0.0244  |
|      |           |         |   |    | 0.0071     | -0.1518         | 0.1038          | -0.0020 | 0.0130  |
|      |           |         |   |    | 0.5798     | 0.0085          | -0.3166         | 0.5777  | 0.0693  |
|      |           |         |   |    | 0.2228     | 0.1288          | -0.0397         | 0.1335  |         |
| 903. | (0.00026) | RY*( 7) | C | 49 | s( 15.97%) | p 1.25( 19.98%) | d 4.01( 64.05%) |         |         |
|      |           |         |   |    | 0.0000     | -0.0018         | 0.3989          | -0.0145 | -0.0179 |
|      |           |         |   |    | 0.0015     | 0.0473          | 0.3017          | -0.0070 | 0.1185  |
|      |           |         |   |    | 0.1980     | -0.0081         | 0.2302          | -0.0139 | 0.1515  |
|      |           |         |   |    | -0.7793    | -0.0635         | 0.0058          | -0.0792 |         |
| 904. | (0.00027) | RY*( 8) | C | 49 | s( 1.72%)  | p21.54( 37.06%) | d35.58( 61.22%) |         |         |
|      |           |         |   |    | 0.0000     | -0.0017         | 0.1310          | 0.0072  | -0.0004 |
|      |           |         |   |    | -0.0016    | 0.0365          | -0.3534         | -0.0039 | 0.0692  |
|      |           |         |   |    | -0.2639    | -0.0062         | 0.1275          | 0.3920  | 0.4730  |
|      |           |         |   |    | 0.0610     | -0.0615         | -0.2092         | -0.5807 |         |
| 905. | (0.00018) | RY*( 9) | C | 49 | s( 0.49%)  | p42.07( 20.47%) | d99.99( 79.04%) |         |         |
|      |           |         |   |    | 0.0000     | 0.0027          | 0.0632          | 0.0292  | 0.0018  |
|      |           |         |   |    | -0.0165    | 0.1764          | -0.3781         | -0.0056 | 0.0986  |
|      |           |         |   |    | 0.1266     | 0.0098          | -0.0588         | -0.0326 | -0.0954 |
|      |           |         |   |    | -0.1042    | 0.4825          | 0.7004          | -0.2170 |         |

|      |           |         |   |    |                                                                                                                                                                                                      |
|------|-----------|---------|---|----|------------------------------------------------------------------------------------------------------------------------------------------------------------------------------------------------------|
| 906. | (0.00015) | RY*(10) | C | 49 | s( 1.20%)p39.39( 47.37%)d42.76( 51.43%)<br>0.0000 0.0070 0.1075 -0.0195 -0.0059<br>0.0043 -0.0415 -0.4382 0.0141 -0.1277<br>0.2521 0.0078 -0.0180 -0.4467 0.5665<br>-0.0099 0.1430 -0.1938 0.3677    |
| 907. | (0.00009) | RY*(11) | C | 49 | s( 14.52%)p 3.36( 48.81%)d 2.52( 36.66%)                                                                                                                                                             |
| 908. | (0.00002) | RY*(12) | C | 49 | s( 1.63%)p 6.92( 11.25%)d53.56( 87.12%)                                                                                                                                                              |
| 909. | (0.00003) | RY*(13) | C | 49 | s( 96.02%)p 0.02( 1.67%)d 0.02( 2.31%)                                                                                                                                                               |
| 910. | (0.00000) | RY*(14) | C | 49 | s( 99.80%)p 0.00( 0.13%)d 0.00( 0.06%)                                                                                                                                                               |
| 911. | (0.00165) | RY*( 1) | C | 50 | s( 3.37%)p23.66( 79.69%)d 5.03( 16.95%)<br>0.0000 0.0010 -0.1183 0.1402 -0.0053<br>0.0060 -0.1020 -0.0779 -0.0074 -0.4681<br>0.0122 0.0117 0.7483 0.0308 0.2271<br>-0.3190 -0.1150 -0.0508 0.0184    |
| 912. | (0.00104) | RY*( 2) | C | 50 | s( 2.20%)p34.75( 76.48%)d 9.69( 21.32%)<br>0.0000 -0.0010 0.1055 -0.1042 0.0025<br>-0.0030 0.0555 0.0875 0.0111 0.7034<br>-0.0670 0.0079 0.5035 -0.0330 -0.3758<br>-0.2404 -0.0630 0.0624 -0.0793    |
| 913. | (0.00038) | RY*( 3) | C | 50 | s( 28.68%)p 2.48( 71.03%)d 0.01( 0.28%)<br>0.0000 -0.0040 0.4061 -0.3489 0.0127<br>-0.0151 0.7199 0.3426 -0.0010 -0.2591<br>0.0237 0.0014 0.0795 -0.0204 0.0297<br>-0.0258 -0.0023 -0.0341 -0.0112   |
| 914. | (0.00016) | RY*( 4) | C | 50 | s( 10.21%)p 5.43( 55.42%)d 3.36( 34.36%)<br>0.0000 0.0015 0.2870 -0.1396 -0.0170<br>-0.0007 -0.0710 -0.2184 -0.0086 0.2536<br>0.5343 -0.0071 0.2205 0.3209 0.4122<br>0.3560 0.1619 -0.0515 0.1348    |
| 915. | (0.00011) | RY*( 5) | C | 50 | s( 22.60%)p 2.81( 63.42%)d 0.62( 13.98%)<br>0.0000 0.0168 0.3334 -0.3313 -0.0695<br>-0.0023 -0.0478 -0.7229 0.0057 -0.1484<br>-0.1724 0.0004 0.0015 -0.2398 -0.1085<br>-0.0196 0.0160 0.2261 -0.2761 |
| 916. | (0.00008) | RY*( 6) | C | 50 | s( 33.44%)p 1.63( 54.41%)d 0.36( 12.15%)                                                                                                                                                             |
| 917. | (0.00002) | RY*( 7) | C | 50 | s( 73.30%)p 0.26( 18.92%)d 0.11( 7.78%)                                                                                                                                                              |
| 918. | (0.00003) | RY*( 8) | C | 50 | s( 9.89%)p 3.21( 31.74%)d 5.90( 58.37%)                                                                                                                                                              |
| 919. | (0.00002) | RY*( 9) | C | 50 | s( 0.70%)p61.03( 42.96%)d80.02( 56.33%)                                                                                                                                                              |
| 920. | (0.00001) | RY*(10) | C | 50 | s( 0.52%)p99.99( 85.09%)d27.92( 14.39%)                                                                                                                                                              |
| 921. | (0.00000) | RY*(11) | C | 50 | s( 99.21%)p 0.01( 0.57%)d 0.00( 0.21%)                                                                                                                                                               |
| 922. | (0.00000) | RY*(12) | C | 50 | s( 0.22%)p37.56( 8.37%)d99.99( 91.41%)                                                                                                                                                               |
| 923. | (0.00001) | RY*(13) | C | 50 | s( 6.05%)p 1.29( 7.78%)d14.25( 86.17%)                                                                                                                                                               |
| 924. | (0.00001) | RY*(14) | C | 50 | s( 9.60%)p 0.45( 4.29%)d 8.97( 86.11%)                                                                                                                                                               |
| 925. | (0.00364) | RY*( 1) | C | 51 | s( 2.61%)p34.38( 89.60%)d 2.99( 7.79%)<br>0.0000 0.0044 0.1586 0.0296 0.0029<br>-0.0082 -0.3436 0.0799 0.0134 0.4970<br>-0.0540 0.0248 0.7215 -0.0103 -0.1749<br>-0.1447 0.1603 0.0110 0.0241        |
| 926. | (0.00135) | RY*( 2) | C | 51 | s( 0.83%)p95.86( 79.35%)d23.95( 19.82%)<br>0.0000 0.0083 -0.0022 0.0903 0.0067<br>-0.0077 -0.6082 -0.1999 0.0059 0.3194<br>0.0172 -0.0003 -0.5245 -0.0787 0.1819<br>-0.3428 0.0605 -0.2055 -0.0415   |
| 927. | (0.00123) | RY*( 3) | C | 51 | s( 0.08%)p99.99( 88.14%)d99.99( 11.78%)<br>0.0000 -0.0004 0.0285 0.0053 -0.0002<br>0.0010 -0.5475 0.0826 0.0042 -0.7070<br>0.1569 0.0023 0.2128 -0.0711 0.1505<br>0.0520 0.2620 0.0894 -0.1258       |
| 928. | (0.00063) | RY*( 4) | C | 51 | s( 0.18%)p99.99( 47.05%)d99.99( 52.76%)<br>0.0000 0.0016 0.0429 -0.0001 0.0005<br>-0.0084 0.1741 0.1870 -0.0100 0.2628<br>0.5398 0.0060 -0.1000 -0.1861 0.3154<br>-0.0569 0.3098 0.5661 -0.0919      |
| 929. | (0.00048) | RY*( 5) | C | 51 | s( 57.09%)p 0.20( 11.55%)d 0.55( 31.36%)<br>0.0000 0.0037 0.7488 0.1007 -0.0066<br>-0.0049 0.1002 -0.1540 0.0112 -0.1117<br>-0.0041 0.0164 -0.1081 -0.2391 -0.0779<br>0.0206 0.2053 -0.0626 0.5109   |
| 930. | (0.00035) | RY*( 6) | C | 51 | s( 5.66%)p14.47( 81.94%)d 2.19( 12.40%)<br>0.0000 -0.0031 0.2090 -0.1103 0.0275<br>0.0065 -0.2133 0.7207 -0.0028 0.0952                                                                              |

|      |           |         |   |    |            |                 |                 |         |         |
|------|-----------|---------|---|----|------------|-----------------|-----------------|---------|---------|
|      |           |         |   |    | -0.4058    | 0.0074          | -0.2822         | -0.0313 | -0.1068 |
|      |           |         |   |    | 0.2542     | -0.0595         | 0.2021          | -0.0598 |         |
| 931. | (0.00026) | RY*( 7) | C | 51 | s( 17.83%) | p 0.78( 13.97%) | d 3.83( 68.21%) |         |         |
|      |           |         |   |    | 0.0000     | -0.0019         | 0.4220          | -0.0085 | -0.0084 |
|      |           |         |   |    | -0.0094    | 0.2408          | 0.2330          | 0.0067  | -0.1216 |
|      |           |         |   |    | -0.0272    | -0.0007         | 0.1038          | 0.0305  | 0.2791  |
|      |           |         |   |    | -0.5302    | -0.2004         | -0.2478         | -0.4706 |         |
| 932. | (0.00025) | RY*( 8) | C | 51 | s( 0.20%)  | p99.99( 60.23%) | d99.99( 39.57%) |         |         |
|      |           |         |   |    | 0.0000     | -0.0013         | 0.0422          | -0.0161 | -0.0003 |
|      |           |         |   |    | -0.0058    | 0.0773          | -0.3247         | -0.0011 | -0.0244 |
|      |           |         |   |    | -0.6194    | 0.0003          | 0.0119          | 0.3263  | 0.3069  |
|      |           |         |   |    | -0.1261    | 0.3230          | 0.4224          | -0.0530 |         |
| 933. | (0.00018) | RY*( 9) | C | 51 | s( 0.22%)  | p42.96( 9.38%)  | d99.99( 90.40%) |         |         |
|      |           |         |   |    | 0.0000     | 0.0021          | 0.0460          | 0.0067  | -0.0041 |
|      |           |         |   |    | -0.0099    | 0.1420          | -0.0835         | -0.0171 | 0.1467  |
|      |           |         |   |    | -0.0834    | 0.0044          | -0.0296         | -0.1921 | 0.0679  |
|      |           |         |   |    | 0.4654     | 0.5310          | -0.4335         | -0.4615 |         |
| 934. | (0.00013) | RY*(10) | C | 51 | s( 0.60%)  | p99.99( 61.14%) | d64.19( 38.26%) |         |         |
|      |           |         |   |    | 0.0000     | 0.0073          | 0.0765          | -0.0060 | -0.0044 |
|      |           |         |   |    | 0.0134     | -0.0777         | -0.3421         | -0.0065 | 0.0151  |
|      |           |         |   |    | -0.1924    | -0.0027         | 0.0884          | -0.6656 | 0.0261  |
|      |           |         |   |    | 0.1471     | -0.4392         | 0.2999          | -0.2783 |         |
| 935. | (0.00010) | RY*(11) | C | 51 | s( 19.41%) | p 2.20( 42.68%) | d 1.95( 37.92%) |         |         |
|      |           |         |   |    | 0.0000     | -0.0013         | 0.3936          | -0.1954 | -0.0304 |
|      |           |         |   |    | 0.0095     | -0.1402         | -0.2851         | 0.0000  | 0.0426  |
|      |           |         |   |    | 0.2808     | 0.0182          | -0.1262         | 0.4784  | -0.3744 |
|      |           |         |   |    | 0.2019     | -0.1355         | 0.1970          | -0.3756 |         |
| 936. | (0.00003) | RY*(12) | C | 51 | s( 93.08%) | p 0.02( 2.07%)  | d 0.05( 4.85%)  |         |         |
| 937. | (0.00002) | RY*(13) | C | 51 | s( 2.42%)  | p 5.36( 12.96%) | d35.01( 84.63%) |         |         |
| 938. | (0.00000) | RY*(14) | C | 51 | s( 99.75%) | p 0.00( 0.18%)  | d 0.00( 0.07%)  |         |         |
| 939. | (0.00168) | RY*( 1) | C | 52 | s( 2.76%)  | p29.07( 80.38%) | d 6.10( 16.86%) |         |         |
|      |           |         |   |    | 0.0000     | 0.0008          | -0.0974         | 0.1347  | -0.0050 |
|      |           |         |   |    | 0.0022     | -0.0697         | -0.0099         | -0.0019 | -0.4739 |
|      |           |         |   |    | -0.0775    | 0.0148          | 0.7535          | -0.0154 | 0.1404  |
|      |           |         |   |    | -0.2105    | -0.2567         | -0.1143         | -0.1600 |         |
| 940. | (0.00104) | RY*( 2) | C | 52 | s( 2.02%)  | p38.21( 77.10%) | d10.35( 20.88%) |         |         |
|      |           |         |   |    | 0.0000     | -0.0010         | 0.1021          | -0.0987 | 0.0029  |
|      |           |         |   |    | 0.0102     | 0.7770          | -0.0218         | -0.0084 | -0.3778 |
|      |           |         |   |    | 0.0889     | -0.0037         | -0.1088         | 0.0638  | -0.1083 |
|      |           |         |   |    | -0.1219    | 0.2005          | -0.3680         | 0.0812  |         |
| 941. | (0.00037) | RY*( 3) | C | 52 | s( 26.52%) | p 2.76( 73.13%) | d 0.01( 0.35%)  |         |         |
|      |           |         |   |    | 0.0000     | -0.0043         | 0.3776          | -0.3499 | 0.0124  |
|      |           |         |   |    | -0.0078    | 0.2215          | 0.1974          | -0.0127 | 0.5600  |
|      |           |         |   |    | 0.2732     | -0.0044         | 0.4952          | 0.0981  | -0.0138 |
|      |           |         |   |    | -0.0424    | -0.0347         | 0.0131          | -0.0118 |         |
| 942. | (0.00017) | RY*( 4) | C | 52 | s( 11.77%) | p 4.37( 51.46%) | d 3.12( 36.77%) |         |         |
|      |           |         |   |    | 0.0000     | 0.0026          | 0.3227          | -0.1149 | -0.0188 |
|      |           |         |   |    | -0.0106    | 0.2501          | 0.3830          | 0.0048  | -0.2271 |
|      |           |         |   |    | -0.4611    | 0.0000          | -0.0448         | -0.1976 | 0.0566  |
|      |           |         |   |    | 0.2660     | -0.1792         | 0.5029          | -0.0935 |         |
| 943. | (0.00011) | RY*( 5) | C | 52 | s( 21.30%) | p 3.04( 64.75%) | d 0.66( 13.96%) |         |         |
|      |           |         |   |    | 0.0000     | -0.0167         | -0.2438         | 0.3848  | 0.0717  |
|      |           |         |   |    | -0.0045    | 0.1044          | 0.5771          | 0.0031  | -0.0434 |
|      |           |         |   |    | 0.3809     | 0.0030          | -0.0845         | 0.3865  | -0.1825 |
|      |           |         |   |    | 0.0166     | -0.2818         | 0.1519          | 0.0591  |         |
| 944. | (0.00008) | RY*( 6) | C | 52 | s( 38.07%) | p 1.33( 50.63%) | d 0.30( 11.30%) |         |         |
| 945. | (0.00002) | RY*( 7) | C | 52 | s( 78.24%) | p 0.21( 16.46%) | d 0.07( 5.30%)  |         |         |
| 946. | (0.00001) | RY*( 8) | C | 52 | s( 1.19%)  | p81.77( 97.42%) | d 1.16( 1.39%)  |         |         |
| 947. | (0.00001) | RY*( 9) | C | 52 | s( 2.09%)  | p 4.11( 8.58%)  | d42.83( 89.33%) |         |         |
| 948. | (0.00001) | RY*(10) | C | 52 | s( 8.26%)  | p 1.12( 9.27%)  | d 9.99( 82.47%) |         |         |
| 949. | (0.00002) | RY*(11) | C | 52 | s( 3.33%)  | p14.52( 48.35%) | d14.51( 48.32%) |         |         |
| 950. | (0.00002) | RY*(12) | C | 52 | s( 8.45%)  | p 2.22( 18.77%) | d 8.61( 72.78%) |         |         |
| 951. | (0.00000) | RY*(13) | C | 52 | s( 95.86%) | p 0.01( 0.64%)  | d 0.04( 3.50%)  |         |         |
| 952. | (0.00001) | RY*(14) | C | 52 | s( 0.15%)  | p21.75( 3.25%)  | d99.99( 96.60%) |         |         |
| 953. | (0.00371) | RY*( 1) | C | 53 | s( 4.46%)  | p19.79( 88.30%) | d 1.62( 7.24%)  |         |         |
|      |           |         |   |    | 0.0000     | 0.0044          | 0.1987          | 0.0713  | 0.0061  |
|      |           |         |   |    | -0.0152    | -0.5844         | 0.0110          | 0.0245  | 0.7011  |
|      |           |         |   |    | -0.0180    | 0.0016          | 0.2176          | -0.0361 | -0.1422 |
|      |           |         |   |    | -0.0978    | 0.1067          | -0.1658         | -0.0613 |         |
| 954. | (0.00163) | RY*( 2) | C | 53 | s( 2.95%)  | p27.94( 82.54%) | d 4.91( 14.51%) |         |         |
|      |           |         |   |    | 0.0000     | 0.0083          | 0.1627          | 0.0538  | -0.0097 |

|      |           |         |   |    |            |                 |                 |         |         |
|------|-----------|---------|---|----|------------|-----------------|-----------------|---------|---------|
|      |           |         |   |    | 0.0016     | 0.6211          | -0.0926         | 0.0056  | 0.2637  |
|      |           |         |   |    | -0.1273    | 0.0045          | 0.5843          | 0.0616  | -0.0282 |
|      |           |         |   |    | 0.0599     | 0.1413          | 0.1070          | -0.3306 |         |
| 955. | (0.00137) | RY*( 3) | C | 53 | s( 5.90%)  | p13.16( 77.64%) | d 2.79( 16.46%) |         |         |
|      |           |         |   |    | 0.0000     | -0.0013         | 0.2252          | 0.0902  | 0.0127  |
|      |           |         |   |    | -0.0038    | 0.3607          | -0.0964         | 0.0024  | 0.4345  |
|      |           |         |   |    | -0.0827    | -0.0026         | -0.6599         | -0.0761 | -0.2242 |
|      |           |         |   |    | 0.2835     | 0.0876          | 0.0536          | 0.1531  |         |
| 956. | (0.00073) | RY*( 4) | C | 53 | s( 38.35%) | p 1.20( 46.05%) | d 0.41( 15.60%) |         |         |
|      |           |         |   |    | 0.0000     | 0.0019          | 0.5306          | 0.3175  | -0.0345 |
|      |           |         |   |    | -0.0030    | -0.0774         | 0.1056          | 0.0133  | -0.2532 |
|      |           |         |   |    | 0.1244     | 0.0036          | -0.1050         | 0.5938  | -0.1845 |
|      |           |         |   |    | 0.0302     | -0.1479         | -0.1507         | -0.2764 |         |
| 957. | (0.00061) | RY*( 5) | C | 53 | s( 0.74%)  | p99.99( 74.46%) | d33.51( 24.80%) |         |         |
|      |           |         |   |    | 0.0000     | -0.0028         | 0.0769          | -0.0364 | 0.0122  |
|      |           |         |   |    | 0.0083     | -0.2629         | -0.7207         | 0.0061  | -0.2003 |
|      |           |         |   |    | -0.3275    | -0.0060         | -0.0072         | 0.0919  | 0.1577  |
|      |           |         |   |    | 0.3409     | 0.3097          | 0.0163          | -0.1037 |         |
| 958. | (0.00039) | RY*( 6) | C | 53 | s( 24.89%) | p 1.92( 47.88%) | d 1.09( 27.23%) |         |         |
|      |           |         |   |    | 0.0000     | -0.0011         | 0.4825          | -0.1258 | 0.0190  |
|      |           |         |   |    | -0.0048    | -0.0593         | 0.4003          | 0.0098  | -0.2085 |
|      |           |         |   |    | -0.0545    | -0.0020         | 0.0671          | -0.5137 | 0.2140  |
|      |           |         |   |    | 0.3950     | 0.1474          | -0.2058         | -0.0797 |         |
| 959. | (0.00032) | RY*( 7) | C | 53 | s( 9.32%)  | p 4.13( 38.45%) | d 5.60( 52.23%) |         |         |
|      |           |         |   |    | 0.0000     | 0.0016          | 0.2980          | -0.0615 | 0.0248  |
|      |           |         |   |    | -0.0051    | 0.0410          | -0.1918         | 0.0016  | -0.1203 |
|      |           |         |   |    | -0.5191    | -0.0024         | 0.1362          | -0.2085 | -0.2935 |
|      |           |         |   |    | -0.2516    | -0.5252         | -0.1005         | 0.2948  |         |
| 960. | (0.00029) | RY*( 8) | C | 53 | s( 13.15%) | p 1.87( 24.65%) | d 4.73( 62.20%) |         |         |
|      |           |         |   |    | 0.0000     | -0.0028         | 0.3047          | -0.1891 | -0.0540 |
|      |           |         |   |    | 0.0010     | -0.0270         | -0.2016         | 0.0107  | -0.0883 |
|      |           |         |   |    | 0.2059     | 0.0143          | -0.2298         | -0.3191 | -0.0425 |
|      |           |         |   |    | -0.5567    | 0.1396          | 0.3450          | -0.4144 |         |
| 961. | (0.00021) | RY*( 9) | C | 53 | s( 12.18%) | p 3.43( 41.78%) | d 3.78( 46.04%) |         |         |
|      |           |         |   |    | 0.0000     | 0.0026          | 0.0298          | 0.3456  | 0.0378  |
|      |           |         |   |    | 0.0001     | 0.0004          | 0.2557          | -0.0147 | 0.0868  |
|      |           |         |   |    | -0.5485    | 0.0025          | -0.1754         | 0.1141  | 0.5713  |
|      |           |         |   |    | -0.3170    | 0.1086          | 0.1457          | -0.0220 |         |
| 962. | (0.00013) | RY*(10) | C | 53 | s( 9.61%)  | p 1.11( 10.65%) | d 8.30( 79.74%) |         |         |
|      |           |         |   |    | 0.0000     | 0.0002          | 0.1657          | 0.2602  | 0.0302  |
|      |           |         |   |    | 0.0096     | -0.1033         | 0.1323          | 0.0085  | -0.1797 |
|      |           |         |   |    | 0.0293     | -0.0187         | 0.2113          | 0.0062  | -0.3043 |
|      |           |         |   |    | 0.0025     | 0.4134          | 0.5418          | 0.4902  |         |
| 963. | (0.00010) | RY*(11) | C | 53 | s( 9.57%)  | p 2.96( 28.32%) | d 6.49( 62.11%) |         |         |
|      |           |         |   |    | 0.0000     | -0.0003         | 0.3086          | 0.0202  | 0.0057  |
|      |           |         |   |    | -0.0172    | 0.1901          | -0.2816         | -0.0004 | 0.0527  |
|      |           |         |   |    | 0.3927     | -0.0097         | 0.0817          | 0.0609  | 0.4177  |
|      |           |         |   |    | -0.2605    | 0.1231          | -0.3427         | 0.4961  |         |
| 964. | (0.00011) | RY*(12) | C | 53 | s( 63.64%) | p 0.46( 29.07%) | d 0.11( 7.29%)  |         |         |
|      |           |         |   |    | 0.0000     | -0.0038         | -0.1321         | 0.7866  | 0.0120  |
|      |           |         |   |    | 0.0053     | -0.0164         | -0.2188         | -0.0069 | -0.0499 |
|      |           |         |   |    | 0.2111     | 0.0058          | 0.0413          | -0.4401 | 0.0278  |
|      |           |         |   |    | 0.0810     | -0.2203         | -0.0278         | -0.1276 |         |
| 965. | (0.00003) | RY*(13) | C | 53 | s( 5.90%)  | p 1.72( 10.15%) | d14.22( 83.95%) |         |         |
| 966. | (0.00000) | RY*(14) | C | 53 | s( 99.28%) | p 0.00( 0.32%)  | d 0.00( 0.41%)  |         |         |
| 967. | (0.00150) | RY*( 1) | C | 54 | s( 6.65%)  | p11.17( 74.28%) | d 2.87( 19.06%) |         |         |
|      |           |         |   |    | 0.0000     | 0.0015          | -0.1563         | 0.2051  | -0.0076 |
|      |           |         |   |    | -0.0090    | -0.8186         | -0.1223         | 0.0095  | 0.1317  |
|      |           |         |   |    | -0.0980    | -0.0069         | -0.1750         | -0.0050 | 0.2065  |
|      |           |         |   |    | -0.0939    | 0.1127          | 0.3332          | -0.1243 |         |
| 968. | (0.00097) | RY*( 2) | C | 54 | s( 0.75%)  | p95.23( 71.17%) | d37.58( 28.08%) |         |         |
|      |           |         |   |    | 0.0000     | 0.0010          | -0.0525         | 0.0687  | -0.0009 |
|      |           |         |   |    | 0.0018     | -0.0520         | 0.0149          | 0.0091  | 0.3931  |
|      |           |         |   |    | -0.1108    | 0.0131          | 0.7358          | -0.0172 | -0.0669 |
|      |           |         |   |    | -0.1448    | -0.1436         | 0.2196          | 0.4319  |         |
| 969. | (0.00026) | RY*( 3) | C | 54 | s( 16.75%) | p 4.82( 80.81%) | d 0.15( 2.45%)  |         |         |
|      |           |         |   |    | 0.0000     | 0.0049          | -0.2034         | 0.3551  | -0.0042 |
|      |           |         |   |    | 0.0067     | -0.0462         | -0.2533         | 0.0076  | -0.6974 |
|      |           |         |   |    | -0.3655    | -0.0027         | 0.3083          | 0.1633  | -0.0257 |
|      |           |         |   |    | 0.0563     | -0.0427         | -0.1364         | 0.0142  |         |
| 970. | (0.00011) | RY*( 4) | C | 54 | s( 21.74%) | p 3.37( 73.26%) | d 0.23( 5.00%)  |         |         |

|      |           |         |      |            |                 |                 |         |         |
|------|-----------|---------|------|------------|-----------------|-----------------|---------|---------|
|      |           |         |      | 0.0000     | -0.0157         | -0.0446         | 0.4562  | 0.0841  |
|      |           |         |      | -0.0019    | -0.0302         | -0.0716         | -0.0012 | -0.1121 |
|      |           |         |      | 0.7449     | 0.0003          | 0.1832          | -0.3542 | -0.0984 |
|      |           |         |      | 0.1679     | 0.1003          | 0.0123          | -0.0440 |         |
| 971. | (0.00012) | RY*( 5) | C 54 | s( 14.62%) | p 4.19( 61.31%) | d 1.65( 24.07%) |         |         |
|      |           |         |      | 0.0000     | 0.0075          | -0.2044         | 0.3217  | -0.0301 |
|      |           |         |      | -0.0032    | 0.2470          | 0.0470          | -0.0046 | 0.3075  |
|      |           |         |      | 0.1203     | -0.0073         | 0.1257          | 0.6519  | 0.1268  |
|      |           |         |      | -0.0393    | 0.0858          | 0.0273          | -0.4636 |         |
| 972. | (0.00007) | RY*( 6) | C 54 | s( 32.06%) | p 1.38( 44.30%) | d 0.74( 23.64%) |         |         |
| 973. | (0.00003) | RY*( 7) | C 54 | s( 77.70%) | p 0.14( 11.11%) | d 0.14( 11.19%) |         |         |
| 974. | (0.00003) | RY*( 8) | C 54 | s( 0.56%)  | p99.99( 91.54%) | d14.10( 7.90%)  |         |         |
| 975. | (0.00003) | RY*( 9) | C 54 | s( 16.05%) | p 1.40( 22.39%) | d 3.83( 61.56%) |         |         |
| 976. | (0.00001) | RY*(10) | C 54 | s( 1.39%)  | p 3.23( 4.48%)  | d67.94( 94.14%) |         |         |
| 977. | (0.00001) | RY*(11) | C 54 | s( 1.94%)  | p 7.46( 14.50%) | d42.96( 83.55%) |         |         |
| 978. | (0.00000) | RY*(12) | C 54 | s( 6.36%)  | p 0.56( 3.57%)  | d14.17( 90.08%) |         |         |
| 979. | (0.00001) | RY*(13) | C 54 | s( 4.29%)  | p10.88( 46.65%) | d11.44( 49.07%) |         |         |
| 980. | (0.00000) | RY*(14) | C 54 | s( 99.14%) | p 0.01( 0.82%)  | d 0.00( 0.04%)  |         |         |
| 981. | (0.00160) | RY*( 1) | C 55 | s( 8.63%)  | p 8.47( 73.11%) | d 2.12( 18.26%) |         |         |
|      |           |         |      | 0.0000     | -0.0071         | 0.2627          | -0.1314 | 0.0003  |
|      |           |         |      | 0.0003     | 0.2914          | 0.1130          | -0.0146 | -0.0432 |
|      |           |         |      | 0.1474     | -0.0172         | -0.7659         | -0.1507 | -0.1076 |
|      |           |         |      | 0.1990     | 0.3499          | -0.0473         | -0.0821 |         |
| 982. | (0.00113) | RY*( 2) | C 55 | s( 2.58%)  | p30.66( 79.23%) | d 7.04( 18.18%) |         |         |
|      |           |         |      | 0.0000     | -0.0019         | 0.1290          | -0.0958 | -0.0033 |
|      |           |         |      | -0.0142    | -0.6721         | 0.1256          | 0.0036  | 0.5352  |
|      |           |         |      | 0.0342     | -0.0027         | -0.1924         | 0.0016  | 0.2924  |
|      |           |         |      | 0.1034     | 0.0903          | 0.2779          | 0.0171  |         |
| 983. | (0.00043) | RY*( 3) | C 55 | s( 7.91%)  | p11.44( 90.47%) | d 0.21( 1.63%)  |         |         |
|      |           |         |      | 0.0000     | 0.0048          | -0.0783         | 0.2701  | -0.0012 |
|      |           |         |      | 0.0064     | -0.5202         | 0.0077          | 0.0102  | -0.7159 |
|      |           |         |      | -0.2619    | -0.0060         | -0.2296         | 0.0022  | 0.0535  |
|      |           |         |      | 0.0379     | 0.0995          | 0.0200          | -0.0406 |         |
| 984. | (0.00016) | RY*( 4) | C 55 | s( 76.62%) | p 0.25( 18.86%) | d 0.06( 4.52%)  |         |         |
|      |           |         |      | 0.0000     | 0.0064          | 0.6640          | -0.5697 | -0.0263 |
|      |           |         |      | 0.0026     | -0.1698         | -0.0221         | 0.0004  | -0.2481 |
|      |           |         |      | -0.0481    | -0.0052         | 0.2820          | -0.1259 | -0.0267 |
|      |           |         |      | 0.0098     | -0.0713         | -0.1722         | -0.0980 |         |
| 985. | (0.00015) | RY*( 5) | C 55 | s( 0.32%)  | p99.99( 97.03%) | d 8.21( 2.64%)  |         |         |
|      |           |         |      | 0.0000     | -0.0015         | 0.0554          | 0.0014  | 0.0121  |
|      |           |         |      | -0.0056    | 0.1541          | 0.9199          | 0.0008  | -0.1021 |
|      |           |         |      | -0.0925    | -0.0032         | 0.1091          | 0.2636  | 0.1298  |
|      |           |         |      | 0.0215     | -0.0437         | 0.0818          | 0.0233  |         |
| 986. | (0.00009) | RY*( 6) | C 55 | s( 3.69%)  | p23.98( 88.47%) | d 2.12( 7.84%)  |         |         |
| 987. | (0.00009) | RY*( 7) | C 55 | s( 19.02%) | p 1.02( 19.32%) | d 3.24( 61.66%) |         |         |
| 988. | (0.00004) | RY*( 8) | C 55 | s( 9.12%)  | p 8.09( 73.83%) | d 1.87( 17.04%) |         |         |
| 989. | (0.00004) | RY*( 9) | C 55 | s( 63.98%) | p 0.23( 15.02%) | d 0.33( 21.00%) |         |         |
| 990. | (0.00001) | RY*(10) | C 55 | s( 1.35%)  | p 7.73( 10.41%) | d65.53( 88.24%) |         |         |
| 991. | (0.00002) | RY*(11) | C 55 | s( 0.71%)  | p28.29( 20.13%) | d99.99( 79.16%) |         |         |
| 992. | (0.00000) | RY*(12) | C 55 | s( 99.18%) | p 0.01( 0.71%)  | d 0.00( 0.11%)  |         |         |
| 993. | (0.00001) | RY*(13) | C 55 | s( 4.27%)  | p 1.67( 7.13%)  | d20.73( 88.59%) |         |         |
| 994. | (0.00001) | RY*(14) | C 55 | s( 2.62%)  | p 2.46( 6.44%)  | d34.76( 90.94%) |         |         |
| 995. | (0.00167) | RY*( 1) | C 56 | s( 8.76%)  | p 8.44( 73.95%) | d 1.97( 17.29%) |         |         |
|      |           |         |      | 0.0000     | -0.0072         | 0.2790          | 0.0985  | -0.0006 |
|      |           |         |      | -0.0120    | 0.0243          | 0.1433          | 0.0184  | 0.8349  |
|      |           |         |      | 0.1281     | 0.0077          | -0.0042         | -0.0663 | -0.3177 |
|      |           |         |      | 0.0276     | 0.2293          | 0.1273          | 0.0496  |         |
| 996. | (0.00111) | RY*( 2) | C 56 | s( 2.23%)  | p36.36( 81.12%) | d 7.46( 16.65%) |         |         |
|      |           |         |      | 0.0000     | -0.0032         | 0.0974          | 0.1132  | -0.0016 |
|      |           |         |      | -0.0093    | -0.2570         | 0.0912          | -0.0032 | -0.0665 |
|      |           |         |      | 0.0018     | -0.0117         | -0.8555         | 0.0154  | -0.0071 |
|      |           |         |      | 0.1594     | -0.0387         | 0.2002          | -0.3154 |         |
| 997. | (0.00050) | RY*( 3) | C 56 | s( 2.73%)  | p35.23( 96.09%) | d 0.43( 1.18%)  |         |         |
|      |           |         |      | 0.0000     | -0.0060         | 0.0441          | 0.1590  | 0.0048  |
|      |           |         |      | -0.0109    | 0.9077          | 0.2141          | -0.0045 | -0.0771 |
|      |           |         |      | 0.0334     | 0.0067          | -0.2517         | -0.1436 | 0.0465  |
|      |           |         |      | 0.0094     | -0.0418         | -0.0752         | 0.0465  |         |
| 998. | (0.00022) | RY*( 4) | C 56 | s( 80.54%) | p 0.21( 16.56%) | d 0.04( 2.90%)  |         |         |
|      |           |         |      | 0.0000     | 0.0076          | 0.6293          | 0.6394  | -0.0242 |
|      |           |         |      | -0.0023    | -0.0661         | -0.2740         | 0.0024  | -0.2625 |
|      |           |         |      | 0.0420     | 0.0020          | 0.1240          | -0.0079 | -0.0348 |

|       |           |         |   |    |                                          |
|-------|-----------|---------|---|----|------------------------------------------|
| 999.  | (0.00013) | RY*( 5) | C | 56 | -0.1246 -0.0151 0.0574 0.0935            |
|       |           |         |   |    | s( 2.27%)p22.17( 50.43%)d20.79( 47.29%)  |
|       |           |         |   |    | 0.0000 0.0000 0.0619 0.1361 0.0200       |
|       |           |         |   |    | -0.0095 0.0862 0.4238 0.0002 -0.0399     |
|       |           |         |   |    | -0.0955 -0.0107 0.3761 0.4062 -0.0091    |
|       |           |         |   |    | 0.2037 -0.1882 0.3286 -0.5366            |
| 1000. | (0.00010) | RY*( 6) | C | 56 | s( 9.31%)p 9.31( 86.70%)d 0.43( 3.99%)   |
|       |           |         |   |    | 0.0000 -0.0127 0.2868 -0.0892 0.0526     |
|       |           |         |   |    | -0.0005 -0.2289 0.6088 0.0098 -0.1389    |
|       |           |         |   |    | -0.2782 0.0060 0.1013 -0.5805 0.0834     |
|       |           |         |   |    | 0.0633 0.0028 -0.1518 0.0765             |
| 1001. | (0.00004) | RY*( 7) | C | 56 | s( 5.89%)p15.45( 91.00%)d 0.53( 3.11%)   |
| 1002. | (0.00005) | RY*( 8) | C | 56 | s( 11.22%)p 5.05( 56.71%)d 2.86( 32.07%) |
| 1003. | (0.00003) | RY*( 9) | C | 56 | s( 49.46%)p 0.50( 24.96%)d 0.52( 25.58%) |
| 1004. | (0.00001) | RY*(10) | C | 56 | s( 6.81%)p 1.33( 9.06%)d12.36( 84.14%)   |
| 1005. | (0.00001) | RY*(11) | C | 56 | s( 0.25%)p 7.08( 1.79%)d99.99( 97.95%)   |
| 1006. | (0.00001) | RY*(12) | C | 56 | s( 11.94%)p 0.42( 4.97%)d 6.96( 83.08%)  |
| 1007. | (0.00001) | RY*(13) | C | 56 | s( 10.09%)p 0.57( 5.74%)d 8.34( 84.17%)  |
| 1008. | (0.00000) | RY*(14) | C | 56 | s( 98.48%)p 0.01( 1.11%)d 0.00( 0.41%)   |
| 1009. | (0.00187) | RY*( 1) | C | 57 | s( 1.79%)p46.60( 83.57%)d 8.16( 14.64%)  |
|       |           |         |   |    | 0.0000 0.0037 -0.0750 0.1108 -0.0023     |
|       |           |         |   |    | -0.0034 0.4307 0.0328 0.0064 0.3973      |
|       |           |         |   |    | 0.0597 -0.0157 -0.6981 -0.0086 0.2045    |
|       |           |         |   |    | -0.1301 -0.1375 -0.0012 -0.2621          |
| 1010. | (0.00134) | RY*( 2) | C | 57 | s( 0.12%)p99.99( 86.61%)d99.99( 13.27%)  |
|       |           |         |   |    | 0.0000 0.0052 0.0301 0.0172 -0.0016      |
|       |           |         |   |    | 0.0035 0.6855 0.0216 -0.0096 -0.6250     |
|       |           |         |   |    | -0.0350 0.0070 0.0505 0.0338 0.0082      |
|       |           |         |   |    | 0.1834 -0.1517 0.2739 0.0303             |
| 1011. | (0.00047) | RY*( 3) | C | 57 | s( 22.08%)p 3.47( 76.71%)d 0.05( 1.21%)  |
|       |           |         |   |    | 0.0000 -0.0009 -0.2013 0.4245 -0.0116    |
|       |           |         |   |    | -0.0024 0.3393 -0.0366 -0.0114 0.4757    |
|       |           |         |   |    | 0.1318 -0.0083 0.5976 0.2227 0.0585      |
|       |           |         |   |    | 0.0394 -0.0709 0.0455 0.0056             |
| 1012. | (0.00025) | RY*( 4) | C | 57 | s( 41.19%)p 1.36( 56.18%)d 0.06( 2.63%)  |
|       |           |         |   |    | 0.0000 -0.0071 0.5899 -0.2526 0.0019     |
|       |           |         |   |    | -0.0011 0.2026 -0.6817 0.0040 0.2245     |
|       |           |         |   |    | 0.0648 0.0058 0.0345 0.0172 -0.1029      |
|       |           |         |   |    | 0.0572 0.0557 -0.0050 0.0963             |
| 1013. | (0.00018) | RY*( 5) | C | 57 | s( 4.67%)p14.41( 67.26%)d 6.01( 28.07%)  |
|       |           |         |   |    | 0.0000 -0.0069 0.1857 -0.1060 0.0304     |
|       |           |         |   |    | -0.0059 0.3421 0.3240 0.0074 0.1411      |
|       |           |         |   |    | -0.5995 0.0028 0.1484 -0.2218 -0.0482    |
|       |           |         |   |    | -0.2562 0.3132 -0.3164 0.1204            |
| 1014. | (0.00015) | RY*( 6) | C | 57 | s( 33.78%)p 1.66( 56.19%)d 0.30( 10.03%) |
|       |           |         |   |    | 0.0000 -0.0149 -0.2684 0.5124 0.0549     |
|       |           |         |   |    | -0.0024 -0.0594 -0.5564 0.0021 -0.2086   |
|       |           |         |   |    | -0.3052 0.0034 -0.0639 -0.3285 -0.1486   |
|       |           |         |   |    | -0.2285 -0.0586 -0.1416 -0.0505          |
| 1015. | (0.00008) | RY*( 7) | C | 57 | s( 56.44%)p 0.44( 25.04%)d 0.33( 18.53%) |
| 1016. | (0.00006) | RY*( 8) | C | 57 | s( 9.60%)p 5.34( 51.26%)d 4.08( 39.14%)  |
| 1017. | (0.00002) | RY*( 9) | C | 57 | s( 2.56%)p 3.63( 9.29%)d34.42( 88.15%)   |
| 1018. | (0.00003) | RY*(10) | C | 57 | s( 18.89%)p 3.92( 74.11%)d 0.37( 7.01%)  |
| 1019. | (0.00002) | RY*(11) | C | 57 | s( 1.89%)p 2.61( 4.94%)d49.20( 93.16%)   |
| 1020. | (0.00001) | RY*(12) | C | 57 | s( 3.87%)p 0.58( 2.26%)d24.25( 93.87%)   |
| 1021. | (0.00000) | RY*(13) | C | 57 | s( 98.43%)p 0.01( 1.19%)d 0.00( 0.38%)   |
| 1022. | (0.00000) | RY*(14) | C | 57 | s( 4.69%)p 1.19( 5.57%)d19.15( 89.74%)   |
| 1023. | (0.00156) | RY*( 1) | C | 58 | s( 7.44%)p 9.86( 73.27%)d 2.59( 19.29%)  |
|       |           |         |   |    | 0.0000 -0.0066 0.2518 -0.1045 -0.0006    |
|       |           |         |   |    | -0.0133 -0.7880 -0.1800 0.0062 -0.0617   |
|       |           |         |   |    | -0.1196 -0.0142 -0.2379 0.0652 -0.2421   |
|       |           |         |   |    | 0.2552 -0.0314 -0.1846 0.1847            |
| 1024. | (0.00112) | RY*( 2) | C | 58 | s( 2.52%)p31.77( 79.92%)d 6.98( 17.57%)  |
|       |           |         |   |    | 0.0000 0.0027 -0.1095 0.1147 0.0006      |
|       |           |         |   |    | 0.0012 0.1545 0.0127 -0.0139 -0.5996     |
|       |           |         |   |    | 0.0977 -0.0075 -0.6365 -0.0260 0.0288    |
|       |           |         |   |    | -0.0744 0.1265 0.2222 0.3224             |
| 1025. | (0.00046) | RY*( 3) | C | 58 | s( 4.69%)p20.08( 94.15%)d 0.25( 1.16%)   |
|       |           |         |   |    | 0.0000 0.0045 -0.0698 0.2049 -0.0001     |
|       |           |         |   |    | -0.0087 0.0763 0.0612 -0.0061 0.7031     |
|       |           |         |   |    | 0.1100 0.0069 -0.6076 -0.2369 -0.0389    |



|       |           |         |   |    |                                                                                                                                                                                                                                     |
|-------|-----------|---------|---|----|-------------------------------------------------------------------------------------------------------------------------------------------------------------------------------------------------------------------------------------|
| 1026. | (0.00018) | RY*( 4) | C | 58 | 0.0484 -0.0479 -0.0735 0.0041<br>s( 56.89%)p 0.55( 31.50%)d 0.20( 11.61%)<br>0.0000 0.0050 0.5975 -0.4597 -0.0212<br>-0.0045 0.2505 -0.1436 -0.0043 0.1651<br>0.4283 -0.0055 -0.0125 0.1440 -0.0041<br>-0.0679 0.0376 0.1019 0.3158 |
| 1027. | (0.00014) | RY*( 5) | C | 58 | s( 21.39%)p 2.45( 52.31%)d 1.23( 26.30%)<br>0.0000 0.0024 -0.2624 0.3805 -0.0160<br>0.0063 -0.2890 -0.0072 -0.0101 0.1192<br>0.5553 -0.0044 0.3389 -0.0443 0.0325<br>0.0487 0.2146 0.2136 0.4098                                    |
| 1028. | (0.00010) | RY*( 6) | C | 58 | s( 5.13%)p16.39( 84.08%)d 2.10( 10.79%)                                                                                                                                                                                             |
| 1029. | (0.00006) | RY*( 7) | C | 58 | s( 0.80%)p68.21( 54.71%)d55.46( 44.49%)                                                                                                                                                                                             |
| 1030. | (0.00004) | RY*( 8) | C | 58 | s( 4.17%)p22.59( 94.12%)d 0.41( 1.71%)                                                                                                                                                                                              |
| 1031. | (0.00004) | RY*( 9) | C | 58 | s( 82.79%)p 0.09( 7.48%)d 0.12( 9.73%)                                                                                                                                                                                              |
| 1032. | (0.00001) | RY*(10) | C | 58 | s( 0.99%)p 6.12( 6.05%)d93.94( 92.96%)                                                                                                                                                                                              |
| 1033. | (0.00001) | RY*(11) | C | 58 | s( 6.56%)p 0.98( 6.45%)d13.26( 86.99%)                                                                                                                                                                                              |
| 1034. | (0.00001) | RY*(12) | C | 58 | s( 4.82%)p 1.43( 6.91%)d18.33( 88.27%)                                                                                                                                                                                              |
| 1035. | (0.00001) | RY*(13) | C | 58 | s( 3.27%)p 2.60( 8.50%)d26.98( 88.23%)                                                                                                                                                                                              |
| 1036. | (0.00000) | RY*(14) | C | 58 | s( 98.56%)p 0.01( 0.73%)d 0.01( 0.71%)                                                                                                                                                                                              |
| 1037. | (0.00167) | RY*( 1) | C | 59 | s( 5.32%)p14.47( 77.04%)d 3.32( 17.64%)<br>0.0000 -0.0030 0.1712 -0.1545 0.0057<br>-0.0044 -0.4947 -0.0820 -0.0042 -0.6189<br>-0.0630 -0.0170 -0.3566 0.0659 -0.2425<br>0.0501 0.0381 0.1122 0.3179                                 |
| 1038. | (0.00108) | RY*( 2) | C | 59 | s( 0.69%)p99.99( 80.45%)d27.28( 18.86%)<br>0.0000 0.0005 0.0611 -0.0564 -0.0012<br>0.0085 0.7263 -0.0772 -0.0071 -0.5161<br>0.0310 -0.0012 -0.0223 0.0555 0.1376<br>-0.3228 0.1759 0.1608 0.0931                                    |
| 1039. | (0.00050) | RY*( 3) | C | 59 | s( 5.19%)p17.85( 92.62%)d 0.42( 2.19%)<br>0.0000 0.0019 0.0192 0.2269 -0.0061<br>-0.0067 0.2188 -0.1391 -0.0065 0.3363<br>0.1179 0.0048 -0.8331 -0.1942 -0.0716<br>0.0030 -0.0191 0.0440 0.1204                                     |
| 1040. | (0.00021) | RY*( 4) | C | 59 | s( 68.99%)p 0.44( 30.07%)d 0.01( 0.93%)<br>0.0000 -0.0063 0.7741 -0.3010 0.0065<br>-0.0008 0.1354 -0.1842 0.0060 0.2799<br>-0.3540 -0.0079 0.0239 0.2100 -0.0692<br>0.0362 -0.0508 -0.0221 0.0131                                   |
| 1041. | (0.00016) | RY*( 5) | C | 59 | s( 1.84%)p44.82( 82.52%)d 8.49( 15.64%)<br>0.0000 0.0038 0.1287 -0.0376 -0.0205<br>-0.0045 0.2098 0.7132 0.0051 -0.1774<br>-0.2749 0.0018 -0.0899 -0.3967 -0.1202<br>0.3029 -0.1840 -0.1026 -0.0762                                 |
| 1042. | (0.00010) | RY*( 6) | C | 59 | s( 31.55%)p 1.90( 59.83%)d 0.27( 8.63%)                                                                                                                                                                                             |
| 1043. | (0.00008) | RY*( 7) | C | 59 | s( 1.58%)p23.38( 36.87%)d39.02( 61.55%)                                                                                                                                                                                             |
| 1044. | (0.00005) | RY*( 8) | C | 59 | s( 25.17%)p 2.52( 63.53%)d 0.45( 11.30%)                                                                                                                                                                                            |
| 1045. | (0.00004) | RY*( 9) | C | 59 | s( 50.33%)p 0.78( 39.17%)d 0.21( 10.50%)                                                                                                                                                                                            |
| 1046. | (0.00001) | RY*(10) | C | 59 | s( 2.65%)p 2.48( 6.59%)d34.20( 90.76%)                                                                                                                                                                                              |
| 1047. | (0.00001) | RY*(11) | C | 59 | s( 2.49%)p 3.78( 9.40%)d35.44( 88.12%)                                                                                                                                                                                              |
| 1048. | (0.00000) | RY*(12) | C | 59 | s( 98.99%)p 0.01( 0.74%)d 0.00( 0.27%)                                                                                                                                                                                              |
| 1049. | (0.00001) | RY*(13) | C | 59 | s( 0.10%)p67.04( 6.51%)d99.99( 93.40%)                                                                                                                                                                                              |
| 1050. | (0.00001) | RY*(14) | C | 59 | s( 5.11%)p 2.90( 14.84%)d15.65( 80.04%)                                                                                                                                                                                             |
| 1051. | (0.00173) | RY*( 1) | C | 60 | s( 5.05%)p15.51( 78.28%)d 3.31( 16.68%)<br>0.0000 -0.0088 0.2127 -0.0718 -0.0011<br>0.0076 -0.1631 -0.1686 -0.0093 -0.6923<br>-0.0748 0.0174 0.4893 0.0553 -0.3247<br>0.2155 -0.0018 -0.0602 0.1062                                 |
| 1052. | (0.00133) | RY*( 2) | C | 60 | s( 0.23%)p99.99( 87.03%)d55.56( 12.74%)<br>0.0000 0.0041 0.0466 -0.0103 -0.0002<br>-0.0024 -0.1142 0.0048 0.0021 0.5711<br>0.0098 0.0151 0.7269 0.0476 0.1948<br>0.2499 0.0401 -0.0338 0.1558                                       |
| 1053. | (0.00047) | RY*( 3) | C | 60 | s( 25.08%)p 2.94( 73.78%)d 0.05( 1.14%)<br>0.0000 0.0029 -0.3162 0.3883 -0.0061<br>-0.0144 0.7474 0.2395 0.0044 -0.2047<br>-0.0910 0.0017 0.2645 0.0376 0.0918<br>0.0298 -0.0329 0.0228 0.0213                                      |
| 1054. | (0.00023) | RY*( 4) | C | 60 | s( 54.05%)p 0.70( 37.90%)d 0.15( 8.04%)<br>0.0000 -0.0064 -0.5018 0.5373 0.0081                                                                                                                                                     |

|       |           |         |   |    |            |                 |                 |         |         |
|-------|-----------|---------|---|----|------------|-----------------|-----------------|---------|---------|
|       |           |         |   |    | 0.0028     | -0.5458         | -0.0789         | 0.0101  | -0.1548 |
|       |           |         |   |    | -0.1355    | -0.0012         | 0.0056          | -0.1801 | 0.2390  |
|       |           |         |   |    | -0.0339    | 0.0287          | -0.0766         | 0.1244  |         |
| 1055. | (0.00019) | RY*( 5) | C | 60 | s( 9.71%)  | p 6.48( 62.90%) | d 2.82( 27.39%) |         |         |
|       |           |         |   |    | 0.0000     | 0.0019          | 0.2406          | -0.1955 | -0.0309 |
|       |           |         |   |    | -0.0037    | 0.0441          | 0.2592          | 0.0093  | -0.0902 |
|       |           |         |   |    | -0.5749    | 0.0078          | -0.1546         | -0.4441 | 0.3335  |
|       |           |         |   |    | 0.3008     | 0.0801          | 0.0471          | 0.2521  |         |
| 1056. | (0.00011) | RY*( 6) | C | 60 | s( 1.41%)  | p64.69( 90.91%) | d 5.47( 7.68%)  |         |         |
|       |           |         |   |    | 0.0000     | -0.0150         | -0.0657         | -0.0474 | 0.0852  |
|       |           |         |   |    | -0.0033    | 0.2507          | -0.6599         | -0.0076 | 0.1219  |
|       |           |         |   |    | -0.1035    | 0.0057          | 0.1125          | -0.6103 | -0.1308 |
|       |           |         |   |    | -0.1979    | 0.0041          | -0.1022         | -0.1003 |         |
| 1057. | (0.00006) | RY*( 7) | C | 60 | s( 25.97%) | p 1.51( 39.33%) | d 1.34( 34.70%) |         |         |
| 1058. | (0.00003) | RY*( 8) | C | 60 | s( 1.92%)  | p46.22( 88.92%) | d 4.76( 9.15%)  |         |         |
| 1059. | (0.00004) | RY*( 9) | C | 60 | s( 44.58%) | p 0.35( 15.81%) | d 0.89( 39.61%) |         |         |
| 1060. | (0.00001) | RY*(10) | C | 60 | s( 8.40%)  | p 1.21( 10.21%) | d 9.68( 81.39%) |         |         |
| 1061. | (0.00001) | RY*(11) | C | 60 | s( 1.23%)  | p 2.60( 3.20%)  | d77.64( 95.57%) |         |         |
| 1062. | (0.00001) | RY*(12) | C | 60 | s( 0.10%)  | p64.51( 6.24%)  | d99.99( 93.66%) |         |         |
| 1063. | (0.00001) | RY*(13) | C | 60 | s( 24.30%) | p 0.18( 4.49%)  | d 2.93( 71.21%) |         |         |
| 1064. | (0.00000) | RY*(14) | C | 60 | s( 97.96%) | p 0.01( 1.20%)  | d 0.01( 0.84%)  |         |         |
| 1065. | (0.00159) | RY*( 1) | C | 61 | s( 8.44%)  | p 8.68( 73.25%) | d 2.17( 18.31%) |         |         |
|       |           |         |   |    | 0.0000     | -0.0069         | 0.2681          | -0.1117 | -0.0007 |
|       |           |         |   |    | 0.0098     | 0.7183          | 0.1639          | -0.0173 | -0.1999 |
|       |           |         |   |    | 0.1207     | -0.0084         | -0.3610         | -0.0662 | -0.2394 |
|       |           |         |   |    | 0.0838     | 0.1175          | -0.3114         | 0.0892  |         |
| 1066. | (0.00108) | RY*( 2) | C | 61 | s( 2.62%)  | p30.41( 79.83%) | d 6.68( 17.54%) |         |         |
|       |           |         |   |    | 0.0000     | 0.0026          | -0.1109         | 0.1181  | 0.0010  |
|       |           |         |   |    | -0.0027    | -0.3166         | 0.0107          | 0.0053  | 0.0348  |
|       |           |         |   |    | -0.0798    | -0.0140         | -0.8297         | 0.0417  | 0.0964  |
|       |           |         |   |    | 0.1194     | 0.3403          | 0.1550          | 0.1096  |         |
| 1067. | (0.00046) | RY*( 3) | C | 61 | s( 3.11%)  | p30.61( 95.27%) | d 0.52( 1.62%)  |         |         |
|       |           |         |   |    | 0.0000     | 0.0050          | -0.0588         | 0.1663  | -0.0001 |
|       |           |         |   |    | 0.0108     | -0.1977         | -0.0964         | 0.0084  | -0.9291 |
|       |           |         |   |    | -0.1933    | -0.0012         | 0.0519          | -0.0304 | -0.0476 |
|       |           |         |   |    | -0.0024    | -0.0097         | -0.1175         | -0.0018 |         |
| 1068. | (0.00019) | RY*( 4) | C | 61 | s( 44.11%) | p 0.88( 38.66%) | d 0.39( 17.23%) |         |         |
|       |           |         |   |    | 0.0000     | 0.0034          | 0.5640          | -0.3504 | -0.0163 |
|       |           |         |   |    | 0.0025     | -0.1936         | 0.2302          | -0.0010 | -0.0589 |
|       |           |         |   |    | -0.2028    | -0.0103         | 0.1930          | 0.4628  | 0.1125  |
|       |           |         |   |    | 0.1461     | 0.3398          | 0.0456          | 0.1439  |         |
| 1069. | (0.00014) | RY*( 5) | C | 61 | s( 35.88%) | p 1.19( 42.57%) | d 0.60( 21.54%) |         |         |
|       |           |         |   |    | 0.0000     | -0.0038         | -0.3676         | 0.4728  | 0.0123  |
|       |           |         |   |    | -0.0069    | 0.3673          | -0.0265         | 0.0026  | 0.0457  |
|       |           |         |   |    | -0.1719    | -0.0091         | 0.2211          | 0.4576  | -0.0271 |
|       |           |         |   |    | 0.0224     | 0.3460          | 0.1342          | 0.2766  |         |
| 1070. | (0.00010) | RY*( 6) | C | 61 | s( 3.50%)  | p25.63( 89.80%) | d 1.91( 6.69%)  |         |         |
| 1071. | (0.00006) | RY*( 7) | C | 61 | s( 1.25%)  | p45.28( 56.44%) | d33.94( 42.31%) |         |         |
| 1072. | (0.00004) | RY*( 8) | C | 61 | s( 3.35%)  | p26.23( 87.89%) | d 2.61( 8.76%)  |         |         |
| 1073. | (0.00004) | RY*( 9) | C | 61 | s( 79.47%) | p 0.10( 8.31%)  | d 0.15( 12.22%) |         |         |
| 1074. | (0.00001) | RY*(10) | C | 61 | s( 0.55%)  | p19.49( 10.75%) | d99.99( 88.69%) |         |         |
| 1075. | (0.00001) | RY*(11) | C | 61 | s( 1.38%)  | p 0.99( 1.37%)  | d70.56( 97.25%) |         |         |
| 1076. | (0.00001) | RY*(12) | C | 61 | s( 16.65%) | p 0.70( 11.58%) | d 4.31( 71.77%) |         |         |
| 1077. | (0.00000) | RY*(13) | C | 61 | s( 98.85%) | p 0.01( 0.94%)  | d 0.00( 0.21%)  |         |         |
| 1078. | (0.00001) | RY*(14) | C | 61 | s( 0.83%)  | p 4.24( 3.51%)  | d99.99( 95.67%) |         |         |
| 1079. | (0.00178) | RY*( 1) | C | 62 | s( 3.90%)  | p20.59( 80.33%) | d 4.04( 15.76%) |         |         |
|       |           |         |   |    | 0.0000     | -0.0012         | 0.1410          | -0.1382 | 0.0042  |
|       |           |         |   |    | 0.0025     | 0.4603          | 0.0253          | 0.0147  | 0.7545  |
|       |           |         |   |    | 0.0758     | 0.0126          | 0.1060          | -0.0642 | -0.1967 |
|       |           |         |   |    | 0.1369     | 0.2611          | -0.0385         | 0.1748  |         |
| 1080. | (0.00127) | RY*( 2) | C | 62 | s( 1.27%)  | p67.26( 85.19%) | d10.69( 13.54%) |         |         |
|       |           |         |   |    | 0.0000     | 0.0038          | -0.0232         | 0.1099  | -0.0051 |
|       |           |         |   |    | -0.0041    | -0.7585         | 0.0517          | 0.0089  | 0.5086  |
|       |           |         |   |    | 0.0361     | -0.0029         | -0.0873         | 0.0782  | -0.0590 |
|       |           |         |   |    | -0.2530    | 0.1880          | 0.0637          | -0.1690 |         |
| 1081. | (0.00040) | RY*( 3) | C | 62 | s( 23.33%) | p 3.27( 76.26%) | d 0.02( 0.41%)  |         |         |
|       |           |         |   |    | 0.0000     | 0.0020          | -0.3315         | 0.3510  | -0.0155 |
|       |           |         |   |    | 0.0031     | -0.0083         | -0.1771         | 0.0008  | 0.0321  |
|       |           |         |   |    | 0.1373     | -0.0156         | 0.8009          | 0.2638  | 0.0398  |
|       |           |         |   |    | 0.0145     | -0.0051         | -0.0185         | 0.0438  |         |
| 1082. | (0.00023) | RY*( 4) | C | 62 | s( 32.53%) | p 2.00( 64.96%) | d 0.08( 2.52%)  |         |         |

|       |           |         |   |    |            |                 |                 |         |         |
|-------|-----------|---------|---|----|------------|-----------------|-----------------|---------|---------|
|       |           |         |   |    | 0.0000     | -0.0015         | 0.5613          | -0.0999 | -0.0140 |
|       |           |         |   |    | -0.0020    | -0.0997         | 0.6255          | -0.0001 | -0.1671 |
|       |           |         |   |    | -0.1659    | 0.0022          | 0.3716          | 0.2341  | -0.0723 |
|       |           |         |   |    | -0.0369    | 0.1124          | -0.0420         | 0.0648  |         |
| 1083. | (0.00016) | RY*( 5) | C | 62 | s( 4.09%)  | p16.33( 66.81%) | d 7.11( 29.10%) |         |         |
|       |           |         |   |    | 0.0000     | -0.0144         | 0.1954          | 0.0197  | 0.0462  |
|       |           |         |   |    | 0.0079     | -0.3246         | 0.0229          | -0.0058 | 0.0239  |
|       |           |         |   |    | 0.2666     | 0.0053          | 0.2184          | -0.6654 | 0.1223  |
|       |           |         |   |    | 0.4110     | -0.2164         | -0.0395         | 0.2425  |         |
| 1084. | (0.00012) | RY*( 6) | C | 62 | s( 37.10%) | p 1.48( 54.73%) | d 0.22( 8.18%)  |         |         |
|       |           |         |   |    | 0.0000     | -0.0122         | -0.4030         | 0.4543  | 0.0444  |
|       |           |         |   |    | 0.0011     | 0.1584          | 0.6149          | 0.0048  | 0.0862  |
|       |           |         |   |    | -0.2110    | -0.0022         | -0.0871         | -0.2908 | -0.0455 |
|       |           |         |   |    | 0.0954     | -0.0362         | -0.0870         | -0.2485 |         |
| 1085. | (0.00007) | RY*( 7) | C | 62 | s( 63.93%) | p 0.43( 27.33%) | d 0.14( 8.75%)  |         |         |
| 1086. | (0.00007) | RY*( 8) | C | 62 | s( 5.40%)  | p10.02( 54.08%) | d 7.51( 40.52%) |         |         |
| 1087. | (0.00003) | RY*( 9) | C | 62 | s( 1.38%)  | p 8.83( 12.22%) | d62.40( 86.40%) |         |         |
| 1088. | (0.00004) | RY*(10) | C | 62 | s( 14.48%) | p 4.55( 65.86%) | d 1.36( 19.66%) |         |         |
| 1089. | (0.00000) | RY*(11) | C | 62 | s( 98.76%) | p 0.01( 1.17%)  | d 0.00( 0.07%)  |         |         |
| 1090. | (0.00001) | RY*(12) | C | 62 | s( 1.46%)  | p 2.44( 3.57%)  | d64.88( 94.97%) |         |         |
| 1091. | (0.00001) | RY*(13) | C | 62 | s( 6.41%)  | p 0.22( 1.38%)  | d14.39( 92.21%) |         |         |
| 1092. | (0.00001) | RY*(14) | C | 62 | s( 5.97%)  | p 1.06( 6.30%)  | d14.70( 87.73%) |         |         |
| 1093. | (0.00043) | RY*( 1) | H | 63 | s( 99.24%) | p 0.01( 0.76%)  |                 |         |         |
|       |           |         |   |    | -0.0010    | 0.9961          | 0.0108          | -0.0448 | 0.0676  |
|       |           |         |   |    | 0.0317     |                 |                 |         |         |
| 1094. | (0.00028) | RY*( 2) | H | 63 | s( 3.98%)  | p24.14( 96.02%) |                 |         |         |
|       |           |         |   |    | 0.0002     | -0.0799         | 0.1828          | -0.2234 | 0.6891  |
|       |           |         |   |    | 0.6599     |                 |                 |         |         |
| 1095. | (0.00011) | RY*( 3) | H | 63 | s( 0.09%)  | p99.99( 99.91%) |                 |         |         |
|       |           |         |   |    | -0.0014    | 0.0244          | -0.0171         | 0.0234  | -0.6833 |
|       |           |         |   |    | 0.7291     |                 |                 |         |         |
| 1096. | (0.00010) | RY*( 4) | H | 63 | s( 82.23%) | p 0.22( 17.77%) |                 |         |         |
| 1097. | (0.00003) | RY*( 5) | H | 63 | s( 14.52%) | p 5.88( 85.48%) |                 |         |         |
| 1098. | (0.00043) | RY*( 1) | H | 64 | s( 98.90%) | p 0.01( 1.10%)  |                 |         |         |
|       |           |         |   |    | -0.0008    | 0.9945          | 0.0069          | 0.0413  | 0.0260  |
|       |           |         |   |    | 0.0928     |                 |                 |         |         |
| 1099. | (0.00028) | RY*( 2) | H | 64 | s( 1.51%)  | p65.32( 98.49%) |                 |         |         |
|       |           |         |   |    | 0.0001     | -0.0707         | 0.1004          | -0.2399 | 0.7009  |
|       |           |         |   |    | 0.6603     |                 |                 |         |         |
| 1100. | (0.00011) | RY*( 3) | H | 64 | s( 2.34%)  | p41.66( 97.66%) |                 |         |         |
|       |           |         |   |    | 0.0000     | 0.0646          | 0.1388          | -0.9505 | -0.1030 |
|       |           |         |   |    | -0.2501    |                 |                 |         |         |
| 1101. | (0.00010) | RY*( 4) | H | 64 | s( 85.22%) | p 0.17( 14.78%) |                 |         |         |
|       |           |         |   |    | 0.0089     | -0.0232         | 0.9228          | 0.1092  | -0.2995 |
|       |           |         |   |    | 0.2148     |                 |                 |         |         |
| 1102. | (0.00003) | RY*( 5) | H | 64 | s( 12.09%) | p 7.27( 87.91%) |                 |         |         |
| 1103. | (0.00120) | RY*( 1) | H | 65 | s( 99.17%) | p 0.01( 0.83%)  |                 |         |         |
|       |           |         |   |    | -0.0032    | 0.9958          | 0.0055          | 0.0033  | -0.0316 |
|       |           |         |   |    | -0.0851    |                 |                 |         |         |
| 1104. | (0.00029) | RY*( 2) | H | 65 | s( 26.01%) | p 2.85( 73.99%) |                 |         |         |
|       |           |         |   |    | -0.0007    | -0.0115         | 0.5098          | -0.7527 | -0.4158 |
|       |           |         |   |    | 0.0240     |                 |                 |         |         |
| 1105. | (0.00026) | RY*( 3) | H | 65 | s( 64.44%) | p 0.55( 35.56%) |                 |         |         |
|       |           |         |   |    | 0.0000     | -0.0233         | 0.8024          | 0.3361  | 0.3566  |
|       |           |         |   |    | -0.3398    |                 |                 |         |         |
| 1106. | (0.00011) | RY*( 4) | H | 65 | s( 10.00%) | p 9.00( 90.00%) |                 |         |         |
|       |           |         |   |    | -0.0018    | 0.0652          | 0.3094          | 0.3394  | -0.1867 |
|       |           |         |   |    | 0.8660     |                 |                 |         |         |
| 1107. | (0.00004) | RY*( 5) | H | 65 | s( 0.43%)  | p99.99( 99.57%) |                 |         |         |
| 1108. | (0.00029) | RY*( 1) | H | 66 | s( 99.82%) | p 0.00( 0.18%)  |                 |         |         |
|       |           |         |   |    | -0.0019    | 0.9991          | 0.0059          | 0.0340  | 0.0150  |
|       |           |         |   |    | 0.0208     |                 |                 |         |         |
| 1109. | (0.00022) | RY*( 2) | H | 66 | s( 0.13%)  | p99.99( 99.87%) |                 |         |         |
|       |           |         |   |    | 0.0000     | 0.0340          | 0.0122          | -0.8391 | -0.5298 |
|       |           |         |   |    | 0.1179     |                 |                 |         |         |
| 1110. | (0.00018) | RY*( 3) | H | 66 | s( 99.72%) | p 0.00( 0.28%)  |                 |         |         |
|       |           |         |   |    | -0.0012    | -0.0076         | 0.9985          | 0.0132  | 0.0127  |
|       |           |         |   |    | 0.0501     |                 |                 |         |         |
| 1111. | (0.00012) | RY*( 4) | H | 66 | s( 0.19%)  | p99.99( 99.81%) |                 |         |         |
|       |           |         |   |    | 0.0003     | 0.0145          | 0.0408          | 0.2887  | -0.6179 |
|       |           |         |   |    | -0.7301    |                 |                 |         |         |

|       |           |         |   |    |                                                                               |
|-------|-----------|---------|---|----|-------------------------------------------------------------------------------|
| 1112. | (0.00002) | RY*( 5) | H | 66 | s( 0.20%)p99.99( 99.80%)                                                      |
| 1113. | (0.00103) | RY*( 1) | H | 67 | s( 98.65%)p 0.01( 1.35%)<br>0.0032 0.9932 -0.0069 0.0064 -0.1096<br>-0.0375   |
| 1114. | (0.00028) | RY*( 2) | H | 67 | s( 84.68%)p 0.18( 15.32%)<br>-0.0008 0.0269 0.9198 -0.3262 0.1972<br>-0.0886  |
| 1115. | (0.00024) | RY*( 3) | H | 67 | s( 4.23%)p22.63( 95.77%)<br>0.0016 0.0380 0.2022 0.8692 0.4288<br>-0.1354     |
| 1116. | (0.00013) | RY*( 4) | H | 67 | s( 11.87%)p 7.43( 88.13%)<br>-0.0003 -0.0837 0.3341 0.3715 -0.8333<br>0.2211  |
| 1117. | (0.00004) | RY*( 5) | H | 67 | s( 0.62%)p99.99( 99.38%)                                                      |
| 1118. | (0.00136) | RY*( 1) | H | 68 | s( 99.24%)p 0.01( 0.76%)<br>0.0031 0.9962 -0.0038 -0.0083 -0.0608<br>-0.0619  |
| 1119. | (0.00033) | RY*( 2) | H | 68 | s( 60.61%)p 0.65( 39.39%)<br>-0.0010 0.0021 0.7785 -0.2316 -0.4077<br>0.4172  |
| 1120. | (0.00025) | RY*( 3) | H | 68 | s( 31.85%)p 2.14( 68.15%)<br>0.0008 0.0289 0.5636 0.5856 0.5504<br>-0.1890    |
| 1121. | (0.00011) | RY*( 4) | H | 68 | s( 7.86%)p11.72( 92.14%)<br>-0.0014 -0.0581 0.2743 -0.4752 -0.0580<br>-0.8320 |
| 1122. | (0.00004) | RY*( 5) | H | 68 | s( 0.49%)p99.99( 99.51%)                                                      |
| 1123. | (0.00031) | RY*( 1) | H | 69 | s( 98.47%)p 0.02( 1.53%)<br>-0.0022 0.9922 -0.0151 0.0465 0.0774<br>-0.0845   |
| 1124. | (0.00024) | RY*( 2) | H | 69 | s( 13.29%)p 6.53( 86.71%)<br>-0.0002 0.1174 0.3451 -0.5237 -0.6091<br>0.4710  |
| 1125. | (0.00018) | RY*( 3) | H | 69 | s( 87.95%)p 0.14( 12.05%)<br>-0.0007 -0.0270 0.9374 0.1739 0.2605<br>-0.1498  |
| 1126. | (0.00012) | RY*( 4) | H | 69 | s( 0.20%)p99.99( 99.80%)<br>-0.0003 -0.0108 0.0437 0.2951 -0.7176<br>-0.6293  |
| 1127. | (0.00002) | RY*( 5) | H | 69 | s( 0.15%)p99.99( 99.85%)                                                      |
| 1128. | (0.00114) | RY*( 1) | H | 70 | s( 99.17%)p 0.01( 0.83%)<br>-0.0031 0.9958 0.0057 0.0680 -0.0438<br>-0.0417   |
| 1129. | (0.00027) | RY*( 2) | H | 70 | s( 89.04%)p 0.12( 10.96%)<br>-0.0006 -0.0279 0.9432 0.2883 -0.1416<br>0.0802  |
| 1130. | (0.00026) | RY*( 3) | H | 70 | s( 0.42%)p99.99( 99.58%)<br>-0.0002 0.0313 0.0570 -0.6226 -0.6525<br>0.4270   |
| 1131. | (0.00011) | RY*( 4) | H | 70 | s( 11.05%)p 8.05( 88.95%)<br>-0.0017 0.0592 0.3271 -0.7227 0.5357<br>-0.2832  |
| 1132. | (0.00004) | RY*( 5) | H | 70 | s( 0.37%)p99.99( 99.63%)                                                      |
| 1133. | (0.00044) | RY*( 1) | H | 71 | s( 99.83%)p 0.00( 0.17%)<br>-0.0010 0.9991 0.0056 0.0364 -0.0179<br>0.0070    |
| 1134. | (0.00033) | RY*( 2) | H | 71 | s( 2.67%)p36.40( 97.33%)<br>0.0001 -0.0256 0.1615 0.4321 -0.1546<br>0.8733    |
| 1135. | (0.00012) | RY*( 3) | H | 71 | s( 0.25%)p99.99( 99.75%)<br>0.0019 -0.0131 0.0483 -0.1072 -0.9844<br>-0.1306  |
| 1136. | (0.00010) | RY*( 4) | H | 71 | s( 84.66%)p 0.18( 15.34%)                                                     |
| 1137. | (0.00003) | RY*( 5) | H | 71 | s( 12.65%)p 6.91( 87.35%)                                                     |
| 1138. | (0.00044) | RY*( 1) | H | 72 | s( 99.55%)p 0.00( 0.45%)<br>-0.0010 0.9977 0.0107 0.0165 0.0270<br>0.0591     |
| 1139. | (0.00033) | RY*( 2) | H | 72 | s( 4.21%)p22.73( 95.79%)<br>0.0001 -0.0570 0.1972 0.4318 -0.1354<br>0.8678    |
| 1140. | (0.00011) | RY*( 3) | H | 72 | s( 1.80%)p54.61( 98.20%)                                                      |

|       |           |         |   |    |             |                |         |         |         |
|-------|-----------|---------|---|----|-------------|----------------|---------|---------|---------|
|       |           |         |   |    | 0.0020      | -0.0216        | 0.1323  | -0.8356 | 0.3106  |
|       |           |         |   |    | 0.4327      |                |         |         |         |
| 1141. | (0.00010) | RY*( 4) | H | 72 | s( 84.30%)p | 0.19( 15.70%)  |         |         |         |
|       |           |         |   |    | 0.0079      | -0.0063        | 0.9181  | 0.1350  | 0.2927  |
|       |           |         |   |    | -0.2306     |                |         |         |         |
| 1142. | (0.00003) | RY*( 5) | H | 72 | s( 10.21%)p | 8.80( 89.79%)  |         |         |         |
| 1143. | (0.00131) | RY*( 1) | H | 73 | s( 99.22%)p | 0.01( 0.78%)   |         |         |         |
|       |           |         |   |    | -0.0034     | 0.9961         | 0.0050  | -0.0290 | -0.0362 |
|       |           |         |   |    | -0.0754     |                |         |         |         |
| 1144. | (0.00028) | RY*( 2) | H | 73 | s( 45.54%)p | 1.20( 54.46%)  |         |         |         |
|       |           |         |   |    | -0.0009     | -0.0136        | 0.6747  | 0.5761  | 0.1594  |
|       |           |         |   |    | -0.4328     |                |         |         |         |
| 1145. | (0.00026) | RY*( 3) | H | 73 | s( 46.18%)p | 1.17( 53.82%)  |         |         |         |
|       |           |         |   |    | -0.0002     | -0.0218        | 0.6792  | -0.5211 | -0.4806 |
|       |           |         |   |    | 0.1888      |                |         |         |         |
| 1146. | (0.00011) | RY*( 4) | H | 73 | s( 8.78%)p  | 10.39( 91.22%) |         |         |         |
|       |           |         |   |    | -0.0021     | 0.0655         | 0.2889  | -0.1202 | 0.7586  |
|       |           |         |   |    | 0.5677      |                |         |         |         |
| 1147. | (0.00004) | RY*( 5) | H | 73 | s( 0.34%)p  | 99.99( 99.66%) |         |         |         |
| 1148. | (0.00032) | RY*( 1) | H | 74 | s( 99.63%)p | 0.00( 0.37%)   |         |         |         |
|       |           |         |   |    | -0.0019     | 0.9981         | 0.0042  | 0.0394  | 0.0410  |
|       |           |         |   |    | -0.0214     |                |         |         |         |
| 1149. | (0.00023) | RY*( 2) | H | 74 | s( 0.59%)p  | 99.99( 99.41%) |         |         |         |
|       |           |         |   |    | -0.0006     | 0.0574         | 0.0507  | -0.7912 | -0.4061 |
|       |           |         |   |    | 0.4509      |                |         |         |         |
| 1150. | (0.00019) | RY*( 3) | H | 74 | s( 99.54%)p | 0.00( 0.46%)   |         |         |         |
|       |           |         |   |    | -0.0009     | -0.0075        | 0.9977  | 0.0547  | 0.0365  |
|       |           |         |   |    | 0.0177      |                |         |         |         |
| 1151. | (0.00012) | RY*( 4) | H | 74 | s( 0.18%)p  | 99.99( 99.82%) |         |         |         |
|       |           |         |   |    | 0.0003      | 0.0002         | 0.0420  | -0.5009 | 0.0216  |
|       |           |         |   |    | -0.8642     |                |         |         |         |
| 1152. | (0.00002) | RY*( 5) | H | 74 | s( 0.12%)p  | 99.99( 99.88%) |         |         |         |
| 1153. | (0.00114) | RY*( 1) | H | 75 | s( 98.84%)p | 0.01( 1.16%)   |         |         |         |
|       |           |         |   |    | 0.0036      | 0.9942         | -0.0061 | -0.0378 | 0.0516  |
|       |           |         |   |    | -0.0865     |                |         |         |         |
| 1154. | (0.00028) | RY*( 2) | H | 75 | s( 91.45%)p | 0.09( 8.55%)   |         |         |         |
|       |           |         |   |    | -0.0008     | 0.0293         | 0.9559  | 0.1130  | -0.2621 |
|       |           |         |   |    | 0.0637      |                |         |         |         |
| 1155. | (0.00024) | RY*( 3) | H | 75 | s( 0.03%)p  | 99.99( 99.97%) |         |         |         |
|       |           |         |   |    | 0.0015      | 0.0158         | -0.0085 | -0.8717 | -0.3136 |
|       |           |         |   |    | 0.3762      |                |         |         |         |
| 1156. | (0.00014) | RY*( 4) | H | 75 | s( 9.20%)p  | 9.87( 90.80%)  |         |         |         |
|       |           |         |   |    | 0.0000      | -0.0803        | 0.2925  | -0.4162 | 0.8106  |
|       |           |         |   |    | -0.2787     |                |         |         |         |
| 1157. | (0.00004) | RY*( 5) | H | 75 | s( 0.53%)p  | 99.99( 99.47%) |         |         |         |
| 1158. | (0.00129) | RY*( 1) | H | 76 | s( 98.63%)p | 0.01( 1.37%)   |         |         |         |
|       |           |         |   |    | 0.0036      | 0.9931         | -0.0039 | -0.0033 | 0.0438  |
|       |           |         |   |    | -0.1087     |                |         |         |         |
| 1159. | (0.00032) | RY*( 2) | H | 76 | s( 68.04%)p | 0.47( 31.96%)  |         |         |         |
|       |           |         |   |    | -0.0012     | -0.0030        | 0.8249  | 0.1841  | 0.5144  |
|       |           |         |   |    | 0.1450      |                |         |         |         |
| 1160. | (0.00024) | RY*( 3) | H | 76 | s( 21.80%)p | 3.59( 78.20%)  |         |         |         |
|       |           |         |   |    | 0.0009      | 0.0579         | 0.4633  | -0.5662 | -0.6189 |
|       |           |         |   |    | 0.2801      |                |         |         |         |
| 1161. | (0.00013) | RY*( 4) | H | 76 | s( 10.88%)p | 8.19( 89.12%)  |         |         |         |
|       |           |         |   |    | -0.0004     | -0.0715        | 0.3220  | 0.2612  | -0.3778 |
|       |           |         |   |    | -0.8247     |                |         |         |         |
| 1162. | (0.00004) | RY*( 5) | H | 76 | s( 0.70%)p  | 99.99( 99.30%) |         |         |         |
| 1163. | (0.00031) | RY*( 1) | H | 77 | s( 99.66%)p | 0.00( 0.34%)   |         |         |         |
|       |           |         |   |    | -0.0021     | 0.9983         | 0.0051  | 0.0395  | 0.0257  |
|       |           |         |   |    | -0.0350     |                |         |         |         |
| 1164. | (0.00022) | RY*( 2) | H | 77 | s( 0.32%)p  | 99.99( 99.68%) |         |         |         |
|       |           |         |   |    | 0.0001      | 0.0513         | 0.0234  | -0.5970 | -0.7668 |
|       |           |         |   |    | 0.2289      |                |         |         |         |
| 1165. | (0.00019) | RY*( 3) | H | 77 | s( 99.19%)p | 0.01( 0.81%)   |         |         |         |
|       |           |         |   |    | -0.0012     | -0.0061        | 0.9959  | 0.0758  | -0.0156 |
|       |           |         |   |    | 0.0454      |                |         |         |         |
| 1166. | (0.00012) | RY*( 4) | H | 77 | s( 0.68%)p  | 99.99( 99.32%) |         |         |         |
|       |           |         |   |    | -0.0001     | -0.0122        | 0.0813  | -0.5433 | 0.1812  |
|       |           |         |   |    | -0.8156     |                |         |         |         |
| 1167. | (0.00002) | RY*( 5) | H | 77 | s( 0.21%)p  | 99.99( 99.79%) |         |         |         |

|       |           |         |   |    |                                        |
|-------|-----------|---------|---|----|----------------------------------------|
| 1168. | (0.00125) | RY*( 1) | H | 78 | s( 99.21%)p 0.01( 0.79%)               |
|       |           |         |   |    | -0.0033 0.9960 0.0052 -0.0757 0.0264   |
|       |           |         |   |    | -0.0378                                |
| 1169. | (0.00026) | RY*( 2) | H | 78 | s( 89.99%)p 0.11( 10.01%)              |
|       |           |         |   |    | -0.0005 -0.0269 0.9482 -0.2481 0.1894  |
|       |           |         |   |    | 0.0517                                 |
| 1170. | (0.00026) | RY*( 3) | H | 78 | s( 0.03%)p99.99( 99.97%)               |
|       |           |         |   |    | 0.0000 0.0133 0.0124 0.5779 0.7702     |
|       |           |         |   |    | -0.2691                                |
| 1171. | (0.00011) | RY*( 4) | H | 78 | s( 10.48%)p 8.55( 89.52%)              |
|       |           |         |   |    | -0.0022 0.0642 0.3172 0.7240 -0.5950   |
|       |           |         |   |    | -0.1304                                |
| 1172. | (0.00004) | RY*( 5) | H | 78 | s( 0.34%)p99.99( 99.66%)               |
| 1173. | (0.00168) | RY*( 1) | H | 79 | s( 99.90%)p 0.00( 0.10%)               |
|       |           |         |   |    | -0.0058 0.9995 0.0002 -0.0097 -0.0266  |
|       |           |         |   |    | -0.0154                                |
| 1174. | (0.00027) | RY*( 2) | H | 79 | s( 30.00%)p 2.33( 70.00%)              |
|       |           |         |   |    | -0.0057 0.0120 0.5475 0.3758 -0.1087   |
|       |           |         |   |    | 0.7396                                 |
| 1175. | (0.00017) | RY*( 3) | H | 79 | s( 3.51%)p27.51( 96.49%)               |
|       |           |         |   |    | -0.0013 0.0109 0.1870 0.7648 0.4009    |
|       |           |         |   |    | -0.4683                                |
| 1176. | (0.00013) | RY*( 4) | H | 79 | s( 58.21%)p 0.72( 41.79%)              |
|       |           |         |   |    | -0.0034 -0.0193 0.7627 -0.2930 -0.3398 |
|       |           |         |   |    | -0.4654                                |
| 1177. | (0.00001) | RY*( 5) | H | 79 | s( 8.44%)p10.85( 91.56%)               |
| 1178. | (0.00357) | RY*( 1) | H | 80 | s( 99.94%)p 0.00( 0.06%)               |
|       |           |         |   |    | 0.0068 0.9997 -0.0013 0.0041 0.0216    |
|       |           |         |   |    | -0.0102                                |
| 1179. | (0.00027) | RY*( 2) | H | 80 | s( 84.48%)p 0.18( 15.52%)              |
|       |           |         |   |    | -0.0074 -0.0032 0.9191 0.3599 0.0684   |
|       |           |         |   |    | -0.1449                                |
| 1180. | (0.00017) | RY*( 3) | H | 80 | s( 6.35%)p14.76( 93.65%)               |
|       |           |         |   |    | 0.0028 0.0073 0.2518 -0.7524 -0.3984   |
|       |           |         |   |    | -0.4601                                |
| 1181. | (0.00013) | RY*( 4) | H | 80 | s( 3.42%)p28.25( 96.58%)               |
|       |           |         |   |    | 0.0006 0.0219 0.1836 -0.0483 -0.6459   |
|       |           |         |   |    | 0.7392                                 |
| 1182. | (0.00002) | RY*( 5) | H | 80 | s( 5.86%)p16.05( 94.14%)               |
| 1183. | (0.00179) | RY*( 1) | H | 81 | s( 99.68%)p 0.00( 0.32%)               |
|       |           |         |   |    | -0.0058 0.9984 -0.0006 -0.0562 -0.0053 |
|       |           |         |   |    | 0.0022                                 |
| 1184. | (0.00029) | RY*( 2) | H | 81 | s( 31.82%)p 2.14( 68.18%)              |
|       |           |         |   |    | -0.0055 0.0267 0.5634 0.4970 -0.0385   |
|       |           |         |   |    | 0.6583                                 |
| 1185. | (0.00019) | RY*( 3) | H | 81 | s( 9.39%)p 9.65( 90.61%)               |
|       |           |         |   |    | 0.0001 0.0214 0.3057 0.2838 0.8004     |
|       |           |         |   |    | -0.4300                                |
| 1186. | (0.00013) | RY*( 4) | H | 81 | s( 51.83%)p 0.93( 48.17%)              |
|       |           |         |   |    | -0.0038 -0.0382 0.7189 -0.6802 -0.0890 |
|       |           |         |   |    | -0.1054                                |
| 1187. | (0.00002) | RY*( 5) | H | 81 | s( 7.33%)p12.65( 92.67%)               |
| 1188. | (0.00302) | RY*( 1) | H | 82 | s( 99.90%)p 0.00( 0.10%)               |
|       |           |         |   |    | 0.0064 0.9995 -0.0011 0.0233 0.0042    |
|       |           |         |   |    | -0.0200                                |
| 1189. | (0.00024) | RY*( 2) | H | 82 | s( 82.32%)p 0.21( 17.68%)              |
|       |           |         |   |    | -0.0059 -0.0074 0.9072 0.1263 0.3484   |
|       |           |         |   |    | -0.1987                                |
| 1190. | (0.00018) | RY*( 3) | H | 82 | s( 0.79%)p99.99( 99.21%)               |
|       |           |         |   |    | 0.0027 0.0111 0.0882 -0.8489 -0.1969   |
|       |           |         |   |    | -0.4824                                |
| 1191. | (0.00013) | RY*( 4) | H | 82 | s( 12.93%)p 6.73( 87.07%)              |
|       |           |         |   |    | 0.0004 0.0255 0.3587 -0.3303 -0.3607   |
|       |           |         |   |    | 0.7946                                 |
| 1192. | (0.00002) | RY*( 5) | H | 82 | s( 4.10%)p23.38( 95.90%)               |
| 1193. | (0.00174) | RY*( 1) | H | 83 | s( 99.82%)p 0.00( 0.18%)               |
|       |           |         |   |    | -0.0057 0.9991 0.0000 0.0231 0.0234    |
|       |           |         |   |    | -0.0264                                |
| 1194. | (0.00026) | RY*( 2) | H | 83 | s( 25.74%)p 2.88( 74.26%)              |
|       |           |         |   |    | -0.0048 0.0106 0.5072 -0.2993 0.5299   |
|       |           |         |   |    | 0.6101                                 |

|       |           |         |   |    |                           |         |         |         |         |         |
|-------|-----------|---------|---|----|---------------------------|---------|---------|---------|---------|---------|
| 1195. | (0.00018) | RY*( 3) | H | 83 | s( 2.50%)p39.02( 97.50%)  | -0.0005 | 0.0322  | 0.1548  | -0.7895 | -0.5931 |
|       |           |         |   |    |                           | -0.0015 |         |         |         |         |
| 1196. | (0.00012) | RY*( 4) | H | 83 | s( 64.71%)p 0.55( 35.29%) | -0.0037 | -0.0186 | 0.8042  | 0.1716  | -0.0181 |
|       |           |         |   |    |                           | -0.5684 |         |         |         |         |
| 1197. | (0.00002) | RY*( 5) | H | 83 | s( 7.27%)p12.76( 92.73%)  |         |         |         |         |         |
| 1198. | (0.00176) | RY*( 1) | H | 84 | s( 99.97%)p 0.00( 0.03%)  | -0.0053 | 0.9998  | 0.0019  | -0.0063 | 0.0132  |
|       |           |         |   |    |                           | -0.0082 |         |         |         |         |
| 1199. | (0.00023) | RY*( 2) | H | 84 | s( 66.89%)p 0.49( 33.11%) | -0.0042 | -0.0015 | 0.8179  | 0.1182  | -0.2579 |
|       |           |         |   |    |                           | -0.5006 |         |         |         |         |
| 1200. | (0.00017) | RY*( 3) | H | 84 | s( 3.50%)p27.55( 96.50%)  | -0.0038 | 0.0072  | 0.1870  | -0.6381 | -0.5896 |
|       |           |         |   |    |                           | 0.4585  |         |         |         |         |
| 1201. | (0.00013) | RY*( 4) | H | 84 | s( 25.88%)p 2.86( 74.12%) | -0.0009 | -0.0087 | 0.5086  | -0.2312 | 0.7248  |
|       |           |         |   |    |                           | 0.4030  |         |         |         |         |
| 1202. | (0.00002) | RY*( 5) | H | 84 | s( 3.80%)p25.31( 96.20%)  |         |         |         |         |         |
| 1203. | (0.00183) | RY*( 1) | H | 85 | s( 99.55%)p 0.00( 0.45%)  | -0.0059 | 0.9977  | -0.0012 | 0.0548  | 0.0211  |
|       |           |         |   |    |                           | -0.0318 |         |         |         |         |
| 1204. | (0.00029) | RY*( 2) | H | 85 | s( 32.77%)p 2.05( 67.23%) | -0.0049 | 0.0322  | 0.5715  | -0.3274 | 0.3542  |
|       |           |         |   |    |                           | 0.6631  |         |         |         |         |
| 1205. | (0.00018) | RY*( 3) | H | 85 | s( 4.70%)p20.27( 95.30%)  | 0.0009  | 0.0374  | 0.2136  | -0.1901 | -0.9323 |
|       |           |         |   |    |                           | 0.2183  |         |         |         |         |
| 1206. | (0.00012) | RY*( 4) | H | 85 | s( 55.23%)p 0.81( 44.77%) | -0.0044 | -0.0410 | 0.7420  | 0.5771  | -0.0283 |
|       |           |         |   |    |                           | -0.3375 |         |         |         |         |
| 1207. | (0.00002) | RY*( 5) | H | 85 | s( 7.79%)p11.83( 92.21%)  |         |         |         |         |         |
| 1208. | (0.00160) | RY*( 1) | H | 86 | s( 99.75%)p 0.00( 0.25%)  | -0.0051 | 0.9987  | -0.0007 | 0.0236  | 0.0435  |
|       |           |         |   |    |                           | 0.0061  |         |         |         |         |
| 1209. | (0.00025) | RY*( 2) | H | 86 | s( 30.18%)p 2.31( 69.82%) | -0.0048 | 0.0253  | 0.5488  | 0.2406  | -0.6357 |
|       |           |         |   |    |                           | -0.4859 |         |         |         |         |
| 1210. | (0.00017) | RY*( 3) | H | 86 | s( 5.84%)p16.12( 94.16%)  | -0.0013 | 0.0314  | 0.2396  | -0.6010 | -0.4748 |
|       |           |         |   |    |                           | 0.5958  |         |         |         |         |
| 1211. | (0.00012) | RY*( 4) | H | 86 | s( 59.66%)p 0.68( 40.34%) | -0.0022 | -0.0286 | 0.7719  | 0.2176  | 0.5070  |
|       |           |         |   |    |                           | 0.3146  |         |         |         |         |
| 1212. | (0.00002) | RY*( 5) | H | 86 | s( 4.61%)p20.67( 95.39%)  |         |         |         |         |         |
| 1213. | (0.00064) | RY*( 1) | H | 87 | s( 91.51%)p 0.09( 8.49%)  | -0.0009 | 0.9566  | -0.0058 | 0.0139  | -0.0305 |
|       |           |         |   |    |                           | 0.2894  |         |         |         |         |
| 1214. | (0.00019) | RY*( 2) | H | 87 | s( 17.32%)p 4.77( 82.68%) | -0.0010 | 0.1027  | 0.4033  | -0.7588 | -0.3730 |
|       |           |         |   |    |                           | -0.3344 |         |         |         |         |
| 1215. | (0.00012) | RY*( 3) | H | 87 | s( 83.41%)p 0.20( 16.59%) | -0.0012 | -0.0305 | 0.9128  | 0.3132  | 0.2267  |
|       |           |         |   |    |                           | 0.1279  |         |         |         |         |
| 1216. | (0.00007) | RY*( 4) | H | 87 | s( 7.42%)p12.47( 92.58%)  |         |         |         |         |         |
| 1217. | (0.00002) | RY*( 5) | H | 87 | s( 0.37%)p99.99( 99.63%)  |         |         |         |         |         |
| 1218. | (0.00071) | RY*( 1) | H | 88 | s( 95.32%)p 0.05( 4.68%)  | -0.0016 | 0.9760  | -0.0241 | -0.1651 | 0.0238  |
|       |           |         |   |    |                           | 0.1378  |         |         |         |         |
| 1219. | (0.00024) | RY*( 2) | H | 88 | s( 58.04%)p 0.72( 41.96%) | -0.0028 | 0.1094  | 0.7540  | 0.2900  | -0.5430 |
|       |           |         |   |    |                           | -0.2017 |         |         |         |         |
| 1220. | (0.00012) | RY*( 3) | H | 88 | s( 24.37%)p 3.10( 75.63%) | -0.0007 | 0.0408  | 0.4920  | 0.2048  | 0.8389  |
|       |           |         |   |    |                           | -0.1027 |         |         |         |         |
| 1221. | (0.00007) | RY*( 4) | H | 88 | s( 17.70%)p 4.65( 82.30%) |         |         |         |         |         |
| 1222. | (0.00002) | RY*( 5) | H | 88 | s( 4.62%)p20.66( 95.38%)  |         |         |         |         |         |
| 1223. | (0.00090) | RY*( 1) | H | 89 | s( 98.67%)p 0.01( 1.33%)  | -0.0026 | 0.9933  | -0.0049 | -0.0244 | -0.0309 |
|       |           |         |   |    |                           | 0.1085  |         |         |         |         |

|       |           |         |   |    |                                                                               |
|-------|-----------|---------|---|----|-------------------------------------------------------------------------------|
| 1224. | (0.00019) | RY*( 2) | H | 89 | s( 74.40%)p 0.34( 25.60%)<br>-0.0053 0.0520 0.8610 -0.0846 -0.1077<br>-0.4871 |
| 1225. | (0.00012) | RY*( 3) | H | 89 | s( 0.09%)p99.99( 99.91%)<br>0.0002 -0.0017 0.0297 0.8177 -0.5737<br>0.0372    |
| 1226. | (0.00010) | RY*( 4) | H | 89 | s( 26.41%)p 2.79( 73.59%)<br>0.0089 -0.0784 0.5078 0.0963 0.2173<br>0.8243    |
| 1227. | (0.00002) | RY*( 5) | H | 89 | s( 0.49%)p99.99( 99.51%)                                                      |
| 1228. | (0.00064) | RY*( 1) | H | 90 | s( 92.43%)p 0.08( 7.57%)<br>-0.0006 0.9614 -0.0088 0.2516 0.1095<br>0.0199    |
| 1229. | (0.00016) | RY*( 2) | H | 90 | s( 33.79%)p 1.96( 66.21%)<br>-0.0008 0.0073 0.5812 0.0341 -0.2372<br>0.7776   |
| 1230. | (0.00013) | RY*( 3) | H | 90 | s( 60.83%)p 0.64( 39.17%)<br>-0.0018 0.0879 0.7750 -0.3043 0.0884<br>-0.5397  |
| 1231. | (0.00006) | RY*( 4) | H | 90 | s( 11.79%)p 7.48( 88.21%)                                                     |
| 1232. | (0.00002) | RY*( 5) | H | 90 | s( 1.21%)p81.84( 98.79%)                                                      |
| 1233. | (0.00062) | RY*( 1) | H | 91 | s( 95.41%)p 0.05( 4.59%)<br>-0.0023 0.9766 -0.0203 0.1540 0.1478<br>0.0177    |
| 1234. | (0.00015) | RY*( 2) | H | 91 | s( 50.53%)p 0.98( 49.47%)<br>-0.0034 0.1168 0.7012 0.0188 -0.6697<br>-0.2142  |
| 1235. | (0.00015) | RY*( 3) | H | 91 | s( 7.30%)p12.69( 92.70%)<br>-0.0024 0.0859 0.2562 -0.8245 0.3673<br>-0.3351   |
| 1236. | (0.00004) | RY*( 4) | H | 91 | s( 45.83%)p 1.18( 54.17%)                                                     |
| 1237. | (0.00002) | RY*( 5) | H | 91 | s( 0.97%)p99.99( 99.03%)                                                      |
| 1238. | (0.00089) | RY*( 1) | H | 92 | s( 96.20%)p 0.04( 3.80%)<br>-0.0020 0.9808 -0.0047 0.0692 0.1794<br>-0.0315   |
| 1239. | (0.00014) | RY*( 2) | H | 92 | s( 2.94%)p33.01( 97.06%)<br>0.0001 -0.0023 0.1715 -0.5622 0.3611<br>0.7240    |
| 1240. | (0.00013) | RY*( 3) | H | 92 | s( 88.54%)p 0.13( 11.46%)<br>-0.0018 0.0632 0.9388 0.0191 -0.3356<br>-0.0399  |
| 1241. | (0.00006) | RY*( 4) | H | 92 | s( 11.97%)p 7.35( 88.03%)                                                     |
| 1242. | (0.00002) | RY*( 5) | H | 92 | s( 0.39%)p99.99( 99.61%)                                                      |
| 1243. | (0.00063) | RY*( 1) | H | 93 | s( 91.63%)p 0.09( 8.37%)<br>-0.0003 0.9572 -0.0086 0.2856 -0.0328<br>0.0326   |
| 1244. | (0.00014) | RY*( 2) | H | 93 | s( 96.00%)p 0.04( 4.00%)<br>-0.0027 0.0627 0.9778 -0.1731 -0.0300<br>-0.0954  |
| 1245. | (0.00014) | RY*( 3) | H | 93 | s( 0.12%)p99.99( 99.88%)<br>-0.0013 0.0347 0.0026 0.0275 0.9528<br>-0.3004    |
| 1246. | (0.00006) | RY*( 4) | H | 93 | s( 10.34%)p 8.67( 89.66%)                                                     |
| 1247. | (0.00002) | RY*( 5) | H | 93 | s( 1.95%)p50.25( 98.05%)                                                      |
| 1248. | (0.00076) | RY*( 1) | H | 94 | s( 95.94%)p 0.04( 4.06%)<br>-0.0022 0.9794 -0.0143 0.1662 0.0378<br>-0.1073   |
| 1249. | (0.00018) | RY*( 2) | H | 94 | s( 64.52%)p 0.55( 35.48%)<br>-0.0011 0.0946 0.7976 -0.1989 0.2070<br>0.5219   |
| 1250. | (0.00015) | RY*( 3) | H | 94 | s( 16.60%)p 5.02( 83.40%)<br>-0.0007 0.0389 0.4056 -0.3590 -0.6787<br>-0.4945 |
| 1251. | (0.00006) | RY*( 4) | H | 94 | s( 22.89%)p 3.37( 77.11%)                                                     |
| 1252. | (0.00002) | RY*( 5) | H | 94 | s( 0.10%)p99.99( 99.90%)                                                      |
| 1253. | (0.00054) | RY*( 1) | H | 95 | s( 92.95%)p 0.08( 7.05%)<br>-0.0017 0.9640 -0.0138 0.2287 -0.0720<br>-0.1142  |
| 1254. | (0.00014) | RY*( 2) | H | 95 | s( 10.59%)p 8.44( 89.41%)<br>-0.0006 0.0474 0.3219 0.2063 -0.2004<br>0.9008   |



|       |           |         |   |     |                                        |
|-------|-----------|---------|---|-----|----------------------------------------|
| 1255. | (0.00013) | RY*( 3) | H | 95  | s( 74.08%)p 0.35( 25.92%)              |
|       |           |         |   |     | -0.0015 0.1075 0.8540 -0.3904 0.2860   |
|       |           |         |   |     | -0.1578                                |
| 1256. | (0.00007) | RY*( 4) | H | 95  | s( 21.71%)p 3.61( 78.29%)              |
| 1257. | (0.00001) | RY*( 5) | H | 95  | s( 0.71%)p99.99( 99.29%)               |
| 1258. | (0.00077) | RY*( 1) | H | 96  | s( 95.89%)p 0.04( 4.11%)               |
|       |           |         |   |     | -0.0006 0.9792 0.0039 -0.0262 -0.1883  |
|       |           |         |   |     | 0.0705                                 |
| 1259. | (0.00018) | RY*( 2) | H | 96  | s( 47.67%)p 1.10( 52.33%)              |
|       |           |         |   |     | -0.0020 -0.0189 0.6902 -0.7140 -0.0268 |
|       |           |         |   |     | -0.1130                                |
| 1260. | (0.00013) | RY*( 3) | H | 96  | s( 46.22%)p 1.16( 53.78%)              |
|       |           |         |   |     | -0.0004 -0.0519 0.6779 0.6564 -0.3178  |
|       |           |         |   |     | 0.0770                                 |
| 1261. | (0.00010) | RY*( 4) | H | 96  | s( 9.42%)p 9.62( 90.58%)               |
| 1262. | (0.00002) | RY*( 5) | H | 96  | s( 0.85%)p99.99( 99.15%)               |
| 1263. | (0.00090) | RY*( 1) | H | 97  | s( 97.95%)p 0.02( 2.05%)               |
|       |           |         |   |     | -0.0017 0.9897 0.0003 -0.0402 -0.1299  |
|       |           |         |   |     | -0.0452                                |
| 1264. | (0.00025) | RY*( 2) | H | 97  | s( 93.72%)p 0.07( 6.28%)               |
|       |           |         |   |     | -0.0021 0.0029 0.9681 -0.0092 -0.0579  |
|       |           |         |   |     | 0.2436                                 |
| 1265. | (0.00012) | RY*( 3) | H | 97  | s( 5.67%)p16.62( 94.33%)               |
|       |           |         |   |     | -0.0001 -0.0075 0.2381 -0.2547 0.3280  |
|       |           |         |   |     | -0.8779                                |
| 1266. | (0.00009) | RY*( 4) | H | 97  | s( 2.05%)p47.83( 97.95%)               |
| 1267. | (0.00002) | RY*( 5) | H | 97  | s( 0.65%)p99.99( 99.35%)               |
| 1268. | (0.00071) | RY*( 1) | H | 98  | s( 95.86%)p 0.04( 4.14%)               |
|       |           |         |   |     | -0.0024 0.9790 -0.0103 -0.0960 -0.1580 |
|       |           |         |   |     | -0.0851                                |
| 1269. | (0.00020) | RY*( 2) | H | 98  | s( 64.17%)p 0.56( 35.83%)              |
|       |           |         |   |     | -0.0021 0.0545 0.7992 -0.2255 0.1325   |
|       |           |         |   |     | 0.5384                                 |
| 1270. | (0.00014) | RY*( 3) | H | 98  | s( 15.30%)p 5.54( 84.70%)              |
|       |           |         |   |     | 0.0003 0.1095 0.3755 0.7837 0.3544     |
|       |           |         |   |     | -0.3274                                |
| 1271. | (0.00009) | RY*( 4) | H | 98  | s( 24.55%)p 3.07( 75.45%)              |
| 1272. | (0.00002) | RY*( 5) | H | 98  | s( 0.17%)p99.99( 99.83%)               |
| 1273. | (0.00062) | RY*( 1) | H | 99  | s( 91.51%)p 0.09( 8.49%)               |
|       |           |         |   |     | -0.0004 0.9566 -0.0093 -0.0206 0.2420  |
|       |           |         |   |     | -0.1610                                |
| 1274. | (0.00014) | RY*( 2) | H | 99  | s( 95.87%)p 0.04( 4.13%)               |
|       |           |         |   |     | -0.0026 0.0661 0.9769 -0.0028 -0.1107  |
|       |           |         |   |     | 0.1703                                 |
| 1275. | (0.00014) | RY*( 3) | H | 99  | s( 0.20%)p99.99( 99.80%)               |
|       |           |         |   |     | -0.0012 0.0439 -0.0075 0.9928 -0.1080  |
|       |           |         |   |     | -0.0278                                |
| 1276. | (0.00006) | RY*( 4) | H | 99  | s( 10.57%)p 8.46( 89.43%)              |
| 1277. | (0.00002) | RY*( 5) | H | 99  | s( 1.89%)p51.93( 98.11%)               |
| 1278. | (0.00080) | RY*( 1) | H | 100 | s( 95.86%)p 0.04( 4.14%)               |
|       |           |         |   |     | -0.0021 0.9790 -0.0112 0.0950 0.1799   |
|       |           |         |   |     | 0.0038                                 |
| 1279. | (0.00016) | RY*( 2) | H | 100 | s( 82.73%)p 0.21( 17.27%)              |
|       |           |         |   |     | -0.0009 0.0947 0.9046 -0.1583 -0.3736  |
|       |           |         |   |     | -0.0900                                |
| 1280. | (0.00015) | RY*( 3) | H | 100 | s( 0.89%)p99.99( 99.11%)               |
|       |           |         |   |     | -0.0006 0.0024 0.0943 -0.4594 0.2174   |
|       |           |         |   |     | 0.8560                                 |
| 1281. | (0.00006) | RY*( 4) | H | 100 | s( 20.39%)p 3.91( 79.61%)              |
| 1282. | (0.00002) | RY*( 5) | H | 100 | s( 0.18%)p99.99( 99.82%)               |
| 1283. | (0.00056) | RY*( 1) | H | 101 | s( 93.59%)p 0.07( 6.41%)               |
|       |           |         |   |     | -0.0016 0.9673 -0.0128 -0.0117 0.2526  |
|       |           |         |   |     | -0.0121                                |
| 1284. | (0.00013) | RY*( 2) | H | 101 | s( 86.27%)p 0.16( 13.73%)              |
|       |           |         |   |     | -0.0018 0.1054 0.9228 0.0874 -0.3555   |
|       |           |         |   |     | -0.0577                                |
| 1285. | (0.00014) | RY*( 3) | H | 101 | s( 0.02%)p99.99( 99.98%)               |
|       |           |         |   |     | 0.0000 0.0118 0.0061 0.5535 0.0204     |
|       |           |         |   |     | 0.8325                                 |
| 1286. | (0.00007) | RY*( 4) | H | 101 | s( 19.46%)p 4.14( 80.54%)              |
| 1287. | (0.00001) | RY*( 5) | H | 101 | s( 0.70%)p99.99( 99.30%)               |

|       |           |         |       |                                                                               |
|-------|-----------|---------|-------|-------------------------------------------------------------------------------|
| 1288. | (0.00060) | RY*( 1) | H 102 | s( 92.64%)p 0.08( 7.36%)<br>-0.0006 0.9624 0.0099 -0.2689 0.0145<br>0.0336    |
| 1289. | (0.00018) | RY*( 2) | H 102 | s( 53.59%)p 0.87( 46.41%)<br>-0.0014 -0.0447 0.7307 -0.1109 -0.5346<br>0.4074 |
| 1290. | (0.00013) | RY*( 3) | H 102 | s( 34.11%)p 1.93( 65.89%)<br>0.0013 -0.1161 0.5724 -0.4029 0.6191<br>-0.3366  |
| 1291. | (0.00010) | RY*( 4) | H 102 | s( 19.32%)p 4.18( 80.68%)<br>-0.0035 0.2407 0.3678 0.8651 0.1810<br>-0.1602   |
| 1292. | (0.00002) | RY*( 5) | H 102 | s( 0.38%)p99.99( 99.62%)                                                      |
| 1293. | (0.00071) | RY*( 1) | H 103 | s( 96.41%)p 0.04( 3.59%)<br>-0.0012 0.9819 -0.0077 -0.1569 0.0352<br>0.1001   |
| 1294. | (0.00022) | RY*( 2) | H 103 | s( 91.62%)p 0.09( 8.38%)<br>-0.0029 0.0392 0.9564 0.0089 -0.1612<br>-0.2402   |
| 1295. | (0.00012) | RY*( 3) | H 103 | s( 2.45%)p39.82( 97.55%)<br>-0.0020 0.0528 0.1473 0.7316 -0.0575<br>0.6610    |
| 1296. | (0.00008) | RY*( 4) | H 103 | s( 8.51%)p10.76( 91.49%)                                                      |
| 1297. | (0.00003) | RY*( 5) | H 103 | s( 1.05%)p94.22( 98.95%)                                                      |
| 1298. | (0.00076) | RY*( 1) | H 104 | s( 96.23%)p 0.04( 3.77%)<br>-0.0023 0.9810 -0.0062 -0.1101 -0.0145<br>0.1592  |
| 1299. | (0.00022) | RY*( 2) | H 104 | s( 69.92%)p 0.43( 30.08%)<br>-0.0023 0.0366 0.8354 -0.1350 -0.4209<br>-0.3247 |
| 1300. | (0.00014) | RY*( 3) | H 104 | s( 11.87%)p 7.42( 88.13%)<br>0.0004 0.1227 0.3220 0.5663 0.6908<br>-0.2889    |
| 1301. | (0.00011) | RY*( 4) | H 104 | s( 21.82%)p 3.58( 78.18%)<br>0.0011 -0.1453 0.4440 -0.2232 0.3317<br>0.7887   |
| 1302. | (0.00002) | RY*( 5) | H 104 | s( 0.21%)p99.99( 99.79%)                                                      |
| 1303. | (0.00059) | RY*( 1) | H 105 | s( 91.25%)p 0.10( 8.75%)<br>-0.0003 0.9552 -0.0087 -0.0226 0.1044<br>-0.2758  |
| 1304. | (0.00014) | RY*( 2) | H 105 | s( 96.45%)p 0.04( 3.55%)<br>-0.0029 0.0578 0.9804 0.0665 -0.1360<br>0.1122    |
| 1305. | (0.00014) | RY*( 3) | H 105 | s( 0.15%)p99.99( 99.85%)<br>-0.0016 0.0381 -0.0031 0.7391 0.6021<br>0.2995    |
| 1306. | (0.00006) | RY*( 4) | H 105 | s( 10.10%)p 8.90( 89.90%)                                                     |
| 1307. | (0.00003) | RY*( 5) | H 105 | s( 2.09%)p46.82( 97.91%)                                                      |
| 1308. | (0.00053) | RY*( 1) | H 106 | s( 91.89%)p 0.09( 8.11%)<br>-0.0015 0.9585 -0.0116 0.0981 -0.0296<br>-0.2658  |
| 1309. | (0.00014) | RY*( 2) | H 106 | s( 19.04%)p 4.25( 80.96%)<br>-0.0007 0.0488 0.4336 -0.8126 0.3416<br>-0.1806  |
| 1310. | (0.00013) | RY*( 3) | H 106 | s( 74.09%)p 0.35( 25.91%)<br>-0.0017 0.0704 0.8578 0.3602 -0.0539<br>0.3556   |
| 1311. | (0.00007) | RY*( 4) | H 106 | s( 14.05%)p 6.12( 85.95%)                                                     |
| 1312. | (0.00002) | RY*( 5) | H 106 | s( 0.99%)p99.99( 99.01%)                                                      |
| 1313. | (0.00074) | RY*( 1) | H 107 | s( 95.58%)p 0.05( 4.42%)<br>-0.0020 0.9775 -0.0197 0.1393 0.0514<br>-0.1487   |
| 1314. | (0.00020) | RY*( 2) | H 107 | s( 53.99%)p 0.85( 46.01%)<br>-0.0014 0.1013 0.7278 -0.4062 0.4268<br>0.3361   |
| 1315. | (0.00014) | RY*( 3) | H 107 | s( 23.14%)p 3.32( 76.86%)<br>-0.0010 0.0644 0.4767 -0.0077 -0.8752<br>0.0504  |
| 1316. | (0.00006) | RY*( 4) | H 107 | s( 26.48%)p 2.78( 73.52%)                                                     |
| 1317. | (0.00002) | RY*( 5) | H 107 | s( 0.85%)p99.99( 99.15%)                                                      |
| 1318. | (0.00076) | RY*( 1) | H 108 | s( 95.72%)p 0.04( 4.28%)                                                      |

|       |           |         |       |  |            |                 |         |         |         |
|-------|-----------|---------|-------|--|------------|-----------------|---------|---------|---------|
|       |           |         |       |  | -0.0007    | 0.9784          | 0.0024  | -0.1621 | -0.1193 |
|       |           |         |       |  | -0.0477    |                 |         |         |         |
| 1319. | (0.00018) | RY*( 2) | H 108 |  | s( 44.01%) | p 1.27( 55.99%) |         |         |         |
|       |           |         |       |  | -0.0019    | -0.0120         | 0.6633  | 0.0190  | -0.3708 |
|       |           |         |       |  | 0.6496     |                 |         |         |         |
| 1320. | (0.00013) | RY*( 3) | H 108 |  | s( 51.47%) | p 0.94( 48.53%) |         |         |         |
|       |           |         |       |  | -0.0010    | -0.0439         | 0.7161  | -0.1133 | 0.0808  |
|       |           |         |       |  | -0.6826    |                 |         |         |         |
| 1321. | (0.00011) | RY*( 4) | H 108 |  | s( 8.02%)  | p11.48( 91.98%) |         |         |         |
|       |           |         |       |  | -0.0004    | 0.1984          | 0.2020  | 0.6359  | 0.6961  |
|       |           |         |       |  | 0.1761     |                 |         |         |         |
| 1322. | (0.00002) | RY*( 5) | H 108 |  | s( 0.82%)  | p99.99( 99.18%) |         |         |         |
| 1323. | (0.00088) | RY*( 1) | H 109 |  | s( 95.98%) | p 0.04( 4.02%)  |         |         |         |
|       |           |         |       |  | -0.0022    | 0.9797          | -0.0014 | -0.0197 | -0.1961 |
|       |           |         |       |  | 0.0369     |                 |         |         |         |
| 1324. | (0.00020) | RY*( 2) | H 109 |  | s( 71.72%) | p 0.39( 28.28%) |         |         |         |
|       |           |         |       |  | -0.0023    | -0.0033         | 0.8469  | -0.4127 | 0.0807  |
|       |           |         |       |  | 0.3255     |                 |         |         |         |
| 1325. | (0.00014) | RY*( 3) | H 109 |  | s( 22.82%) | p 3.38( 77.18%) |         |         |         |
|       |           |         |       |  | 0.0013     | 0.1024          | 0.4666  | 0.5756  | 0.3432  |
|       |           |         |       |  | -0.5681    |                 |         |         |         |
| 1326. | (0.00009) | RY*( 4) | H 109 |  | s( 9.37%)  | p 9.67( 90.63%) |         |         |         |
| 1327. | (0.00002) | RY*( 5) | H 109 |  | s( 0.16%)  | p99.99( 99.84%) |         |         |         |
| 1328. | (0.00066) | RY*( 1) | H 110 |  | s( 96.01%) | p 0.04( 3.99%)  |         |         |         |
|       |           |         |       |  | -0.0016    | 0.9798          | -0.0027 | -0.0626 | -0.1853 |
|       |           |         |       |  | -0.0406    |                 |         |         |         |
| 1329. | (0.00024) | RY*( 2) | H 110 |  | s( 85.84%) | p 0.16( 14.16%) |         |         |         |
|       |           |         |       |  | -0.0026    | 0.0079          | 0.9265  | -0.3480 | 0.1419  |
|       |           |         |       |  | 0.0184     |                 |         |         |         |
| 1330. | (0.00014) | RY*( 3) | H 110 |  | s( 11.98%) | p 7.34( 88.02%) |         |         |         |
|       |           |         |       |  | -0.0010    | 0.0417          | 0.3437  | 0.8722  | -0.1479 |
|       |           |         |       |  | 0.3124     |                 |         |         |         |
| 1331. | (0.00007) | RY*( 4) | H 110 |  | s( 5.10%)  | p18.62( 94.90%) |         |         |         |
| 1332. | (0.00002) | RY*( 5) | H 110 |  | s( 1.11%)  | p89.20( 98.89%) |         |         |         |
| 1333. | (0.00075) | RY*( 1) | H 111 |  | s( 94.88%) | p 0.05( 5.12%)  |         |         |         |
|       |           |         |       |  | -0.0007    | 0.9741          | -0.0009 | 0.1363  | 0.0626  |
|       |           |         |       |  | -0.1695    |                 |         |         |         |
| 1334. | (0.00017) | RY*( 2) | H 111 |  | s( 4.59%)  | p20.77( 95.41%) |         |         |         |
|       |           |         |       |  | -0.0018    | 0.0344          | 0.2116  | 0.0064  | 0.8333  |
|       |           |         |       |  | 0.5096     |                 |         |         |         |
| 1335. | (0.00014) | RY*( 3) | H 111 |  | s( 94.14%) | p 0.06( 5.86%)  |         |         |         |
|       |           |         |       |  | -0.0025    | 0.0006          | 0.9703  | -0.1120 | -0.1543 |
|       |           |         |       |  | -0.1491    |                 |         |         |         |
| 1336. | (0.00009) | RY*( 4) | H 111 |  | s( 4.78%)  | p19.92( 95.22%) |         |         |         |
| 1337. | (0.00002) | RY*( 5) | H 111 |  | s( 1.65%)  | p59.54( 98.35%) |         |         |         |
| 1338. | (0.00085) | RY*( 1) | H 112 |  | s( 96.23%) | p 0.04( 3.77%)  |         |         |         |
|       |           |         |       |  | -0.0023    | 0.9809          | -0.0086 | -0.0001 | 0.1468  |
|       |           |         |       |  | -0.1272    |                 |         |         |         |
| 1339. | (0.00021) | RY*( 2) | H 112 |  | s( 52.23%) | p 0.91( 47.77%) |         |         |         |
|       |           |         |       |  | -0.0013    | 0.0507          | 0.7209  | 0.5942  | 0.0097  |
|       |           |         |       |  | 0.3529     |                 |         |         |         |
| 1340. | (0.00015) | RY*( 3) | H 112 |  | s( 37.21%) | p 1.69( 62.79%) |         |         |         |
|       |           |         |       |  | -0.0004    | 0.0514          | 0.6079  | -0.6556 | -0.4245 |
|       |           |         |       |  | -0.1337    |                 |         |         |         |
| 1341. | (0.00008) | RY*( 4) | H 112 |  | s( 14.22%) | p 6.03( 85.78%) |         |         |         |
| 1342. | (0.00002) | RY*( 5) | H 112 |  | s( 0.15%)  | p99.99( 99.85%) |         |         |         |
| 1343. | (0.00047) | RY*( 1) | H 113 |  | s( 93.67%) | p 0.07( 6.33%)  |         |         |         |
|       |           |         |       |  | -0.0017    | 0.9677          | -0.0170 | 0.0771  | 0.1067  |
|       |           |         |       |  | -0.2144    |                 |         |         |         |
| 1344. | (0.00015) | RY*( 2) | H 113 |  | s( 9.50%)  | p 9.53( 90.50%) |         |         |         |
|       |           |         |       |  | -0.0013    | -0.0191         | 0.3076  | 0.8114  | -0.4925 |
|       |           |         |       |  | -0.0641    |                 |         |         |         |
| 1345. | (0.00011) | RY*( 3) | H 113 |  | s( 42.66%) | p 1.34( 57.34%) |         |         |         |
|       |           |         |       |  | -0.0028    | 0.1975          | 0.6226  | -0.2278 | -0.0875 |
|       |           |         |       |  | 0.7168     |                 |         |         |         |
| 1346. | (0.00005) | RY*( 4) | H 113 |  | s( 52.91%) | p 0.89( 47.09%) |         |         |         |
| 1347. | (0.00002) | RY*( 5) | H 113 |  | s( 1.29%)  | p76.33( 98.71%) |         |         |         |
| 1348. | (0.00064) | RY*( 1) | H 114 |  | s( 91.79%) | p 0.09( 8.21%)  |         |         |         |
|       |           |         |       |  | -0.0004    | 0.9580          | -0.0083 | -0.0521 | -0.2643 |
|       |           |         |       |  | -0.0976    |                 |         |         |         |
| 1349. | (0.00014) | RY*( 2) | H 114 |  | s( 95.77%) | p 0.04( 4.23%)  |         |         |         |

|       |           |         |       |  |                           |         |         |         |         |
|-------|-----------|---------|-------|--|---------------------------|---------|---------|---------|---------|
|       |           |         |       |  | -0.0030                   | 0.0607  | 0.9767  | -0.0311 | 0.2024  |
|       |           |         |       |  | -0.0188                   |         |         |         |         |
| 1350. | (0.00014) | RY*( 3) | H 114 |  | s( 0.20%)p99.99( 99.80%)  |         |         |         |         |
|       |           |         |       |  | -0.0015                   | 0.0429  | 0.0117  | -0.4989 | -0.0655 |
|       |           |         |       |  | 0.8630                    |         |         |         |         |
| 1351. | (0.00006) | RY*( 4) | H 114 |  | s( 9.89%)p 9.11( 90.11%)  |         |         |         |         |
| 1352. | (0.00002) | RY*( 5) | H 114 |  | s( 2.39%)p40.79( 97.61%)  |         |         |         |         |
| 1353. | (0.00055) | RY*( 1) | H 115 |  | s( 93.07%)p 0.07( 6.93%)  |         |         |         |         |
|       |           |         |       |  | -0.0016                   | 0.9646  | -0.0152 | -0.1695 | -0.1460 |
|       |           |         |       |  | -0.1390                   |         |         |         |         |
| 1354. | (0.00013) | RY*( 2) | H 115 |  | s( 81.62%)p 0.23( 18.38%) |         |         |         |         |
|       |           |         |       |  | -0.0015                   | 0.1248  | 0.8948  | 0.1645  | 0.2423  |
|       |           |         |       |  | 0.3130                    |         |         |         |         |
| 1355. | (0.00014) | RY*( 3) | H 115 |  | s( 0.64%)p99.99( 99.36%)  |         |         |         |         |
|       |           |         |       |  | -0.0001                   | 0.0240  | 0.0766  | 0.7880  | -0.5785 |
|       |           |         |       |  | -0.1948                   |         |         |         |         |
| 1356. | (0.00007) | RY*( 4) | H 115 |  | s( 24.01%)p 3.16( 75.99%) |         |         |         |         |
| 1357. | (0.00002) | RY*( 5) | H 115 |  | s( 0.70%)p99.99( 99.30%)  |         |         |         |         |
| 1358. | (0.00078) | RY*( 1) | H 116 |  | s( 96.09%)p 0.04( 3.91%)  |         |         |         |         |
|       |           |         |       |  | -0.0022                   | 0.9802  | -0.0135 | -0.1598 | -0.1151 |
|       |           |         |       |  | -0.0184                   |         |         |         |         |
| 1359. | (0.00018) | RY*( 2) | H 116 |  | s( 65.12%)p 0.54( 34.88%) |         |         |         |         |
|       |           |         |       |  | -0.0011                   | 0.0940  | 0.8015  | 0.4968  | -0.0341 |
|       |           |         |       |  | 0.3177                    |         |         |         |         |
| 1360. | (0.00015) | RY*( 3) | H 116 |  | s( 15.42%)p 5.49( 84.58%) |         |         |         |         |
|       |           |         |       |  | -0.0007                   | 0.0374  | 0.3909  | -0.1784 | 0.6246  |
|       |           |         |       |  | -0.6511                   |         |         |         |         |
| 1361. | (0.00006) | RY*( 4) | H 116 |  | s( 23.23%)p 3.30( 76.77%) |         |         |         |         |
| 1362. | (0.00002) | RY*( 5) | H 116 |  | s( 0.19%)p99.99( 99.81%)  |         |         |         |         |
| 1363. | (0.00063) | RY*( 1) | H 117 |  | s( 92.01%)p 0.09( 7.99%)  |         |         |         |         |
|       |           |         |       |  | -0.0005                   | 0.9592  | -0.0097 | -0.0940 | -0.2634 |
|       |           |         |       |  | 0.0413                    |         |         |         |         |
| 1364. | (0.00016) | RY*( 2) | H 117 |  | s( 40.16%)p 1.49( 59.84%) |         |         |         |         |
|       |           |         |       |  | -0.0008                   | 0.0096  | 0.6336  | 0.7263  | -0.2580 |
|       |           |         |       |  | -0.0658                   |         |         |         |         |
| 1365. | (0.00013) | RY*( 3) | H 117 |  | s( 54.46%)p 0.84( 45.54%) |         |         |         |         |
|       |           |         |       |  | -0.0019                   | 0.0942  | 0.7319  | -0.4604 | 0.4897  |
|       |           |         |       |  | 0.0598                    |         |         |         |         |
| 1366. | (0.00006) | RY*( 4) | H 117 |  | s( 12.36%)p 7.09( 87.64%) |         |         |         |         |
| 1367. | (0.00002) | RY*( 5) | H 117 |  | s( 1.05%)p94.57( 98.95%)  |         |         |         |         |
| 1368. | (0.00088) | RY*( 1) | H 118 |  | s( 95.87%)p 0.04( 4.13%)  |         |         |         |         |
|       |           |         |       |  | -0.0019                   | 0.9791  | -0.0047 | -0.1141 | -0.0823 |
|       |           |         |       |  | 0.1467                    |         |         |         |         |
| 1369. | (0.00014) | RY*( 2) | H 118 |  | s( 6.40%)p14.63( 93.60%)  |         |         |         |         |
|       |           |         |       |  | 0.0000                    | 0.0084  | 0.2528  | 0.7356  | 0.1528  |
|       |           |         |       |  | 0.6095                    |         |         |         |         |
| 1370. | (0.00013) | RY*( 3) | H 118 |  | s( 86.45%)p 0.16( 13.55%) |         |         |         |         |
|       |           |         |       |  | -0.0018                   | 0.0593  | 0.9279  | -0.0229 | 0.0321  |
|       |           |         |       |  | -0.3660                   |         |         |         |         |
| 1371. | (0.00006) | RY*( 4) | H 118 |  | s( 10.84%)p 8.23( 89.16%) |         |         |         |         |
| 1372. | (0.00002) | RY*( 5) | H 118 |  | s( 0.49%)p99.99( 99.51%)  |         |         |         |         |
| 1373. | (0.00062) | RY*( 1) | H 119 |  | s( 95.44%)p 0.05( 4.56%)  |         |         |         |         |
|       |           |         |       |  | -0.0021                   | 0.9768  | -0.0175 | -0.0735 | -0.1741 |
|       |           |         |       |  | 0.0993                    |         |         |         |         |
| 1374. | (0.00015) | RY*( 2) | H 119 |  | s( 49.50%)p 1.02( 50.50%) |         |         |         |         |
|       |           |         |       |  | -0.0038                   | 0.1316  | 0.6911  | -0.0904 | 0.7049  |
|       |           |         |       |  | -0.0040                   |         |         |         |         |
| 1375. | (0.00015) | RY*( 3) | H 119 |  | s( 15.28%)p 5.54( 84.72%) |         |         |         |         |
|       |           |         |       |  | -0.0008                   | 0.0287  | 0.3899  | 0.0703  | -0.3833 |
|       |           |         |       |  | -0.8338                   |         |         |         |         |
| 1376. | (0.00005) | RY*( 4) | H 119 |  | s( 38.94%)p 1.57( 61.06%) |         |         |         |         |
| 1377. | (0.00002) | RY*( 5) | H 119 |  | s( 0.88%)p99.99( 99.12%)  |         |         |         |         |
| 1378. | (0.00056) | RY*( 1) | H 120 |  | s( 92.85%)p 0.08( 7.15%)  |         |         |         |         |
|       |           |         |       |  | -0.0007                   | 0.9636  | -0.0026 | 0.2373  | -0.1194 |
|       |           |         |       |  | 0.0308                    |         |         |         |         |
| 1379. | (0.00017) | RY*( 2) | H 120 |  | s( 40.40%)p 1.47( 59.60%) |         |         |         |         |
|       |           |         |       |  | -0.0026                   | 0.0395  | 0.6344  | 0.2283  | 0.7266  |
|       |           |         |       |  | -0.1261                   |         |         |         |         |
| 1380. | (0.00013) | RY*( 3) | H 120 |  | s( 59.66%)p 0.68( 40.34%) |         |         |         |         |
|       |           |         |       |  | 0.0010                    | -0.0202 | 0.7721  | -0.2192 | -0.5813 |
|       |           |         |       |  | 0.1319                    |         |         |         |         |

|       |           |         |       |                                                                               |
|-------|-----------|---------|-------|-------------------------------------------------------------------------------|
| 1381. | (0.00008) | RY*( 4) | H 120 | s( 6.94%)p13.41( 93.06%)                                                      |
| 1382. | (0.00002) | RY*( 5) | H 120 | s( 0.19%)p99.99( 99.81%)                                                      |
| 1383. | (0.00083) | RY*( 1) | H 121 | s( 95.04%)p 0.05( 4.96%)<br>-0.0012 0.9749 -0.0023 0.2019 -0.0925<br>0.0172   |
| 1384. | (0.00020) | RY*( 2) | H 121 | s( 94.64%)p 0.06( 5.36%)<br>-0.0030 0.0234 0.9725 -0.0096 0.2165<br>0.0818    |
| 1385. | (0.00013) | RY*( 3) | H 121 | s( 4.71%)p20.25( 95.29%)<br>0.0014 -0.0767 0.2029 0.1534 -0.6164<br>-0.7413   |
| 1386. | (0.00006) | RY*( 4) | H 121 | s( 4.38%)p21.85( 95.62%)                                                      |
| 1387. | (0.00002) | RY*( 5) | H 121 | s( 1.28%)p77.08( 98.72%)                                                      |
| 1388. | (0.00073) | RY*( 1) | H 122 | s( 96.06%)p 0.04( 3.94%)<br>-0.0015 0.9800 -0.0140 0.1533 0.0794<br>0.0978    |
| 1389. | (0.00025) | RY*( 2) | H 122 | s( 67.30%)p 0.49( 32.70%)<br>-0.0030 0.0548 0.8185 0.0880 -0.0060<br>-0.5650  |
| 1390. | (0.00013) | RY*( 3) | H 122 | s( 12.82%)p 6.80( 87.18%)<br>-0.0006 0.1157 0.3389 -0.7603 -0.3786<br>0.3878  |
| 1391. | (0.00009) | RY*( 4) | H 122 | s( 20.72%)p 3.83( 79.28%)                                                     |
| 1392. | (0.00002) | RY*( 5) | H 122 | s( 3.14%)p30.87( 96.86%)                                                      |
| 1393. | (0.00070) | RY*( 1) | H 123 | s( 94.88%)p 0.05( 5.12%)<br>-0.0007 0.9740 -0.0061 0.0542 0.1679<br>0.1418    |
| 1394. | (0.00020) | RY*( 2) | H 123 | s( 28.86%)p 2.46( 71.14%)<br>-0.0014 0.0564 0.5343 0.5548 0.0481<br>-0.6334   |
| 1395. | (0.00012) | RY*( 3) | H 123 | s( 69.75%)p 0.43( 30.25%)<br>-0.0007 0.0037 0.8351 -0.3809 -0.1710<br>0.3581  |
| 1396. | (0.00007) | RY*( 4) | H 123 | s( 6.38%)p14.66( 93.62%)                                                      |
| 1397. | (0.00003) | RY*( 5) | H 123 | s( 0.17%)p99.99( 99.83%)                                                      |
| 1398. | (0.00073) | RY*( 1) | H 124 | s( 95.65%)p 0.05( 4.35%)<br>-0.0017 0.9778 -0.0183 0.1844 0.0750<br>0.0625    |
| 1399. | (0.00024) | RY*( 2) | H 124 | s( 62.30%)p 0.61( 37.70%)<br>-0.0022 0.0808 0.7852 -0.3389 0.3100<br>-0.4075  |
| 1400. | (0.00012) | RY*( 3) | H 124 | s( 19.04%)p 4.25( 80.96%)<br>-0.0011 0.0767 0.4295 -0.2182 -0.7419<br>0.4600  |
| 1401. | (0.00008) | RY*( 4) | H 124 | s( 18.24%)p 4.48( 81.76%)                                                     |
| 1402. | (0.00002) | RY*( 5) | H 124 | s( 4.81%)p19.79( 95.19%)                                                      |
| 1403. | (0.00056) | RY*( 1) | H 125 | s( 93.15%)p 0.07( 6.85%)<br>-0.0015 0.9652 -0.0026 0.0731 0.1790<br>0.1763    |
| 1404. | (0.00017) | RY*( 2) | H 125 | s( 30.00%)p 2.33( 70.00%)<br>-0.0015 0.0684 0.5434 0.6225 -0.5557<br>-0.0601  |
| 1405. | (0.00014) | RY*( 3) | H 125 | s( 69.77%)p 0.43( 30.23%)<br>-0.0014 -0.0342 0.8346 -0.3715 0.4017<br>-0.0543 |
| 1406. | (0.00007) | RY*( 4) | H 125 | s( 6.31%)p14.84( 93.69%)                                                      |
| 1407. | (0.00002) | RY*( 5) | H 125 | s( 0.80%)p99.99( 99.20%)                                                      |
| 1408. | (0.00062) | RY*( 1) | H 126 | s( 91.71%)p 0.09( 8.29%)<br>-0.0004 0.9576 -0.0104 -0.2351 -0.0549<br>0.1568  |
| 1409. | (0.00016) | RY*( 2) | H 126 | s( 39.90%)p 1.51( 60.10%)<br>-0.0007 0.0148 0.6315 0.1376 0.6568<br>0.3882    |
| 1410. | (0.00012) | RY*( 3) | H 126 | s( 54.50%)p 0.83( 45.50%)<br>-0.0019 0.0945 0.7322 0.1691 -0.4797<br>-0.4430  |
| 1411. | (0.00006) | RY*( 4) | H 126 | s( 12.96%)p 6.71( 87.04%)                                                     |
| 1412. | (0.00002) | RY*( 5) | H 126 | s( 0.96%)p99.99( 99.04%)                                                      |
| 1413. | (0.00062) | RY*( 1) | H 127 | s( 95.91%)p 0.04( 4.09%)<br>-0.0024 0.9791 -0.0197 -0.1305 -0.0877<br>0.1271  |

|       |           |         |       |                                                                               |
|-------|-----------|---------|-------|-------------------------------------------------------------------------------|
| 1414. | (0.00017) | RY*( 2) | H 127 | s( 58.58%)p 0.71( 41.42%)<br>-0.0045 0.1288 0.7545 0.2689 0.0212<br>-0.5843   |
| 1415. | (0.00015) | RY*( 3) | H 127 | s( 3.22%)p30.07( 96.78%)<br>0.0006 -0.0267 0.1774 -0.7474 0.6321<br>-0.0979   |
| 1416. | (0.00005) | RY*( 4) | H 127 | s( 41.14%)p 1.43( 58.86%)                                                     |
| 1417. | (0.00002) | RY*( 5) | H 127 | s( 1.19%)p82.93( 98.81%)                                                      |
| 1418. | (0.00088) | RY*( 1) | H 128 | s( 95.49%)p 0.05( 4.51%)<br>-0.0019 0.9772 -0.0055 -0.0592 -0.1700<br>0.1126  |
| 1419. | (0.00015) | RY*( 2) | H 128 | s( 5.84%)p16.14( 94.16%)<br>-0.0001 0.0062 0.2415 0.7301 0.1803<br>0.6133     |
| 1420. | (0.00013) | RY*( 3) | H 128 | s( 86.00%)p 0.16( 14.00%)<br>-0.0020 0.0671 0.9249 -0.1283 0.2176<br>-0.2761  |
| 1421. | (0.00006) | RY*( 4) | H 128 | s( 12.01%)p 7.32( 87.99%)                                                     |
| 1422. | (0.00002) | RY*( 5) | H 128 | s( 0.71%)p99.99( 99.29%)                                                      |
| 1423. | (0.00064) | RY*( 1) | H 129 | s( 91.66%)p 0.09( 8.34%)<br>-0.0004 0.9573 -0.0088 -0.2729 0.0629<br>0.0710   |
| 1424. | (0.00014) | RY*( 2) | H 129 | s( 95.22%)p 0.05( 4.78%)<br>-0.0025 0.0636 0.9737 0.1535 0.0099<br>-0.1553    |
| 1425. | (0.00015) | RY*( 3) | H 129 | s( 0.59%)p99.99( 99.41%)<br>-0.0014 0.0466 0.0609 0.0543 -0.9132<br>0.3965    |
| 1426. | (0.00006) | RY*( 4) | H 129 | s( 10.82%)p 8.24( 89.18%)                                                     |
| 1427. | (0.00002) | RY*( 5) | H 129 | s( 1.76%)p55.94( 98.24%)                                                      |
| 1428. | (0.00079) | RY*( 1) | H 130 | s( 96.11%)p 0.04( 3.89%)<br>-0.0022 0.9803 -0.0121 -0.1737 -0.0915<br>-0.0182 |
| 1429. | (0.00017) | RY*( 2) | H 130 | s( 73.07%)p 0.37( 26.93%)<br>-0.0014 0.0925 0.8498 0.3259 0.1899<br>0.3564    |
| 1430. | (0.00015) | RY*( 3) | H 130 | s( 10.00%)p 9.00( 90.00%)<br>-0.0006 0.0186 0.3156 0.0981 0.1567<br>-0.9305   |
| 1431. | (0.00006) | RY*( 4) | H 130 | s( 20.56%)p 3.86( 79.44%)                                                     |
| 1432. | (0.00002) | RY*( 5) | H 130 | s( 0.31%)p99.99( 99.69%)                                                      |
| 1433. | (0.00059) | RY*( 1) | H 131 | s( 95.06%)p 0.05( 4.94%)<br>-0.0017 0.9749 -0.0136 -0.2171 -0.0082<br>-0.0466 |
| 1434. | (0.00013) | RY*( 2) | H 131 | s( 72.41%)p 0.38( 27.59%)<br>-0.0016 0.1270 0.8414 0.4642 0.0152<br>0.2454    |
| 1435. | (0.00014) | RY*( 3) | H 131 | s( 0.46%)p99.99( 99.54%)<br>-0.0004 0.0105 0.0669 0.1911 -0.8129<br>-0.5460   |
| 1436. | (0.00007) | RY*( 4) | H 131 | s( 31.52%)p 2.17( 68.48%)                                                     |
| 1437. | (0.00002) | RY*( 5) | H 131 | s( 0.59%)p99.99( 99.41%)                                                      |
| 1438. | (0.00076) | RY*( 1) | H 132 | s( 95.71%)p 0.04( 4.29%)<br>-0.0006 0.9783 0.0039 0.0088 0.1903<br>-0.0812    |
| 1439. | (0.00018) | RY*( 2) | H 132 | s( 52.73%)p 0.90( 47.27%)<br>-0.0022 -0.0148 0.7260 0.6235 -0.0856<br>-0.2767 |
| 1440. | (0.00014) | RY*( 3) | H 132 | s( 43.30%)p 1.31( 56.70%)<br>-0.0001 -0.0442 0.6565 -0.6977 0.2750<br>0.0677  |
| 1441. | (0.00009) | RY*( 4) | H 132 | s( 7.55%)p12.25( 92.45%)                                                      |
| 1442. | (0.00002) | RY*( 5) | H 132 | s( 0.75%)p99.99( 99.25%)                                                      |
| 1443. | (0.00092) | RY*( 1) | H 133 | s( 96.52%)p 0.04( 3.48%)<br>-0.0019 0.9824 -0.0002 0.0221 0.1030<br>-0.1540   |
| 1444. | (0.00023) | RY*( 2) | H 133 | s( 93.67%)p 0.07( 6.33%)<br>-0.0015 0.0041 0.9678 0.0292 0.1933<br>0.1584     |
| 1445. | (0.00013) | RY*( 3) | H 133 | s( 5.98%)p15.71( 94.02%)<br>0.0005 0.0113 0.2444 0.0648 -0.8396               |

-0.4807

1446. (0.00008) RY\*( 4) H 133 s( 3.56%)p27.13( 96.44%)  
1447. (0.00002) RY\*( 5) H 133 s( 0.31%)p99.99( 99.69%)  
1448. (0.00075) RY\*( 1) H 134 s( 96.00%)p 0.04( 4.00%)  
-0.0023 0.9797 -0.0103 0.0551 0.0567  
-0.1838

1449. (0.00021) RY\*( 2) H 134 s( 69.49%)p 0.44( 30.51%)  
-0.0021 0.0575 0.8316 0.2961 0.2132  
0.4147

1450. (0.00014) RY\*( 3) H 134 s( 14.94%)p 5.69( 85.06%)  
0.0003 0.0829 0.3776 -0.7947 -0.4665  
0.0387

1451. (0.00009) RY\*( 4) H 134 s( 19.45%)p 4.14( 80.55%)  
1452. (0.00002) RY\*( 5) H 134 s( 0.17%)p99.99( 99.83%)  
1453. (0.04220) BD\*( 1) C 1 - O 2  
( 64.58%) 0.8036\* C 1 s( 34.37%)p 1.91( 65.56%)d 0.00( 0.06%)  
-0.0003 0.5810 0.0787 0.0026 0.0008  
-0.1509 0.0180 -0.0037 0.2199 -0.0122  
0.0042 -0.7618 0.0561 -0.0225 -0.0018  
0.0052 -0.0118 -0.0016 0.0209  
( 35.42%) -0.5952\* O 2 s( 39.92%)p 1.50( 59.94%)d 0.00( 0.14%)  
0.0000 0.6315 -0.0188 0.0010 0.0004  
0.1663 -0.0065 0.0004 -0.1629 0.0093  
-0.0006 0.7377 -0.0308 0.0019 -0.0037  
0.0129 -0.0137 -0.0010 0.0316

1454. (0.48062) BD\*( 2) C 1 - O 2  
( 73.22%) 0.8557\* C 1 s( 0.01%)p99.99( 99.72%)d18.73( 0.27%)  
0.0002 -0.0112 -0.0035 -0.0020 -0.0003  
-0.2669 0.0057 0.0009 0.9119 -0.0046  
0.0006 0.3072 -0.0019 0.0018 -0.0103  
0.0104 -0.0412 -0.0105 -0.0253  
( 26.78%) -0.5175\* O 2 s( 0.02%)p99.99( 99.88%)d 5.56( 0.10%)  
0.0000 -0.0134 -0.0014 -0.0001 0.0000  
-0.2373 0.0040 0.0009 0.9322 -0.0117  
-0.0030 0.2709 -0.0019 -0.0007 0.0081  
-0.0058 0.0259 0.0058 0.0143

1455. (0.11075) BD\*( 1) C 1 - B 14  
( 39.95%) 0.6321\* C 1 s( 25.83%)p 2.87( 74.14%)d 0.00( 0.03%)  
0.0001 -0.5076 0.0246 0.0070 0.0004  
-0.8031 -0.0080 0.0050 -0.1500 0.0005  
-0.0048 -0.2708 -0.0196 0.0097 -0.0031  
-0.0135 0.0001 -0.0090 -0.0021  
( 60.05%) -0.7749\* B 14 s( 18.02%)p 4.55( 81.92%)d 0.00( 0.06%)  
0.0048 -0.4244 -0.0071 0.0015 0.0003  
0.4109 -0.0053 0.0033 -0.0158 -0.0057  
-0.0025 0.8062 0.0060 0.0081 -0.0063  
-0.0176 0.0066 -0.0089 -0.0131

1456. (0.06815) BD\*( 1) C 1 - B 15  
( 39.01%) 0.6246\* C 1 s( 40.15%)p 1.49( 59.83%)d 0.00( 0.02%)  
-0.0001 0.6328 -0.0332 0.0034 -0.0001  
-0.5101 -0.0005 -0.0070 -0.3077 -0.0062  
-0.0019 0.4931 0.0133 -0.0081 0.0030  
-0.0054 -0.0082 -0.0022 0.0088  
( 60.99%) -0.7810\* B 15 s( 26.26%)p 2.81( 73.68%)d 0.00( 0.06%)  
-0.0013 0.5124 -0.0006 0.0061 0.0024  
-0.1733 -0.0148 -0.0020 0.2436 -0.0080  
0.0044 -0.8041 0.0048 -0.0218 0.0056  
0.0010 -0.0151 -0.0019 0.0182

1457. (0.03587) BD\*( 1) C 3 - C 4  
( 50.75%) 0.7124\* C 3 s( 33.55%)p 1.98( 66.40%)d 0.00( 0.05%)  
0.0000 0.5792 0.0032 -0.0011 0.0000  
0.6350 0.0004 0.0019 -0.3736 0.0069  
-0.0003 0.3477 0.0118 -0.0009 -0.0140  
0.0145 -0.0072 0.0091 -0.0030  
( 49.25%) -0.7018\* C 4 s( 36.74%)p 1.72( 63.22%)d 0.00( 0.05%)  
-0.0002 0.6061 -0.0011 -0.0031 0.0001  
-0.6195 -0.0040 0.0023 0.3295 0.0077  
0.0040 -0.3739 0.0032 0.0010 -0.0129  
0.0138 -0.0072 0.0075 -0.0019

1458. (0.02327) BD\*( 1) C 3 - C 8  
( 49.58%) 0.7041\* C 3 s( 34.07%)p 1.93( 65.88%)d 0.00( 0.05%)

|       |           |            |                                            |    |         |         |         |         |         |
|-------|-----------|------------|--------------------------------------------|----|---------|---------|---------|---------|---------|
|       |           |            |                                            |    | 0.0001  | -0.5836 | -0.0091 | -0.0048 | -0.0002 |
|       |           |            |                                            |    | 0.4788  | -0.0077 | 0.0076  | -0.4929 | 0.0029  |
|       |           |            |                                            |    | -0.0080 | -0.4318 | -0.0076 | 0.0010  | 0.0138  |
|       |           |            |                                            |    | 0.0104  | -0.0129 | 0.0009  | -0.0007 |         |
|       | ( 50.42%) | -0.7101* C | 8 s( 35.90%)p 1.78( 64.04%)d 0.00( 0.06%)  |    | -0.0001 | -0.5992 | 0.0007  | 0.0043  | 0.0002  |
|       |           |            |                                            |    | -0.4507 | 0.0025  | 0.0059  | 0.4802  | 0.0069  |
|       |           |            |                                            |    | -0.0071 | 0.4539  | 0.0196  | -0.0025 | 0.0166  |
|       |           |            |                                            |    | 0.0120  | -0.0142 | -0.0003 | 0.0001  |         |
| 1459. | (0.33135) | BD*( 2) C  | 3 - C                                      | 8  |         |         |         |         |         |
|       | ( 52.21%) | 0.7226* C  | 3 s( 0.01%)p 1.00( 99.96%)d 0.00( 0.04%)   |    | -0.0002 | -0.0061 | -0.0052 | 0.0017  | 0.0003  |
|       |           |            |                                            |    | 0.5871  | -0.0051 | -0.0041 | 0.7766  | -0.0049 |
|       |           |            |                                            |    | 0.0038  | -0.2274 | 0.0013  | 0.0034  | 0.0020  |
|       |           |            |                                            |    | 0.0102  | 0.0115  | -0.0080 | -0.0077 |         |
|       | ( 47.79%) | -0.6913* C | 8 s( 0.00%)p 1.00( 99.97%)d 0.00( 0.03%)   |    | 0.0000  | -0.0005 | 0.0012  | -0.0001 | 0.0005  |
|       |           |            |                                            |    | 0.5811  | -0.0025 | 0.0077  | 0.7759  | -0.0046 |
|       |           |            |                                            |    | 0.0117  | -0.2444 | 0.0029  | -0.0050 | 0.0039  |
|       |           |            |                                            |    | -0.0044 | 0.0011  | 0.0165  | 0.0008  |         |
| 1460. | (0.03220) | BD*( 1) C  | 3 - C                                      | 53 |         |         |         |         |         |
|       | ( 49.42%) | 0.7030* C  | 3 s( 32.34%)p 2.09( 67.63%)d 0.00( 0.03%)  |    | 0.0001  | -0.5687 | 0.0066  | 0.0047  | 0.0002  |
|       |           |            |                                            |    | 0.1492  | 0.0019  | 0.0020  | 0.1170  | -0.0003 |
|       |           |            |                                            |    | -0.0019 | 0.8000  | 0.0171  | -0.0075 | 0.0010  |
|       |           |            |                                            |    | -0.0041 | -0.0037 | -0.0004 | -0.0167 |         |
|       | ( 50.58%) | -0.7112* C | 53 s( 26.35%)p 2.79( 73.59%)d 0.00( 0.06%) |    | -0.0002 | -0.5134 | 0.0001  | -0.0003 | -0.0007 |
|       |           |            |                                            |    | -0.1312 | 0.0019  | 0.0018  | -0.1039 | 0.0049  |
|       |           |            |                                            |    | -0.0005 | -0.8413 | 0.0005  | -0.0012 | -0.0017 |
|       |           |            |                                            |    | -0.0071 | -0.0055 | -0.0001 | -0.0222 |         |
| 1461. | (0.03690) | BD*( 1) C  | 4 - C                                      | 5  |         |         |         |         |         |
|       | ( 49.60%) | 0.7043* C  | 4 s( 36.67%)p 1.73( 63.29%)d 0.00( 0.05%)  |    | 0.0002  | -0.6055 | 0.0021  | 0.0024  | -0.0002 |
|       |           |            |                                            |    | -0.1961 | 0.0018  | 0.0000  | -0.1188 | -0.0073 |
|       |           |            |                                            |    | -0.0029 | -0.7617 | -0.0054 | -0.0009 | -0.0001 |
|       |           |            |                                            |    | -0.0098 | -0.0064 | -0.0016 | -0.0184 |         |
|       | ( 50.40%) | -0.7100* C | 5 s( 34.19%)p 1.92( 65.76%)d 0.00( 0.05%)  |    | 0.0000  | -0.5847 | -0.0024 | 0.0005  | 0.0000  |
|       |           |            |                                            |    | 0.1664  | 0.0103  | -0.0024 | 0.1615  | -0.0086 |
|       |           |            |                                            |    | 0.0002  | 0.7770  | 0.0013  | 0.0000  | 0.0001  |
|       |           |            |                                            |    | -0.0093 | -0.0063 | -0.0014 | -0.0199 |         |
| 1462. | (0.37359) | BD*( 2) C  | 4 - C                                      | 5  |         |         |         |         |         |
|       | ( 46.53%) | 0.6821* C  | 4 s( 0.01%)p 1.00( 99.97%)d 0.00( 0.02%)   |    | 0.0002  | 0.0074  | 0.0051  | -0.0012 | -0.0002 |
|       |           |            |                                            |    | -0.5662 | 0.0040  | 0.0069  | -0.7814 | 0.0019  |
|       |           |            |                                            |    | 0.0052  | 0.2617  | -0.0052 | -0.0035 | -0.0036 |
|       |           |            |                                            |    | -0.0068 | -0.0089 | 0.0036  | 0.0072  |         |
|       | ( 53.47%) | -0.7313* C | 5 s( 0.00%)p 1.00( 99.95%)d 0.00( 0.05%)   |    | 0.0000  | 0.0033  | 0.0047  | -0.0017 | -0.0001 |
|       |           |            |                                            |    | -0.5493 | 0.0052  | 0.0024  | -0.7857 | 0.0081  |
|       |           |            |                                            |    | 0.0027  | 0.2835  | -0.0007 | 0.0017  | 0.0075  |
|       |           |            |                                            |    | 0.0073  | 0.0147  | 0.0077  | -0.0082 |         |
| 1463. | (0.03921) | BD*( 1) C  | 4 - N                                      | 9  |         |         |         |         |         |
|       | ( 62.34%) | 0.7896* C  | 4 s( 26.55%)p 2.76( 73.39%)d 0.00( 0.06%)  |    | -0.0002 | 0.5151  | 0.0074  | 0.0066  | -0.0005 |
|       |           |            |                                            |    | 0.5066  | 0.0050  | 0.0081  | -0.5159 | -0.0055 |
|       |           |            |                                            |    | -0.0090 | -0.4593 | 0.0016  | -0.0076 | -0.0161 |
|       |           |            |                                            |    | -0.0134 | 0.0140  | 0.0008  | -0.0009 |         |
|       | ( 37.66%) | -0.6136* N | 9 s( 34.35%)p 1.91( 65.61%)d 0.00( 0.04%)  |    | -0.0001 | 0.5861  | 0.0014  | -0.0018 | -0.0002 |
|       |           |            |                                            |    | -0.5033 | -0.0022 | 0.0070  | 0.4858  | 0.0043  |
|       |           |            |                                            |    | -0.0067 | 0.4082  | -0.0003 | -0.0048 | -0.0105 |
|       |           |            |                                            |    | -0.0123 | 0.0112  | -0.0002 | -0.0016 |         |
| 1464. | (0.02290) | BD*( 1) C  | 5 - C                                      | 6  |         |         |         |         |         |
|       | ( 49.51%) | 0.7036* C  | 5 s( 33.92%)p 1.95( 66.03%)d 0.00( 0.05%)  |    | 0.0001  | -0.5823 | -0.0106 | -0.0031 | -0.0001 |
|       |           |            |                                            |    | 0.4752  | 0.0025  | 0.0010  | -0.4927 | 0.0003  |
|       |           |            |                                            |    | -0.0048 | -0.4376 | 0.0094  | -0.0090 | 0.0150  |
|       |           |            |                                            |    | 0.0100  | -0.0120 | -0.0004 | 0.0013  |         |
|       | ( 50.49%) | -0.7106* C | 6 s( 35.81%)p 1.79( 64.13%)d 0.00( 0.06%)  |    |         |         |         |         |         |



|       |           |           |       |         |            |                 |                |         |         |
|-------|-----------|-----------|-------|---------|------------|-----------------|----------------|---------|---------|
|       |           |           |       | -0.0001 | -0.5984    | 0.0016          | 0.0044         | 0.0001  |         |
|       |           |           |       | -0.4925 | -0.0164    | 0.0051          | 0.4866         | 0.0112  |         |
|       |           |           |       | -0.0066 | 0.4018     | -0.0051         | -0.0076        | 0.0168  |         |
|       |           |           |       | 0.0117  | -0.0137    | -0.0007         | 0.0004         |         |         |
| 1465. | (0.03210) | BD*( 1) C | 5 - C | 51      |            |                 |                |         |         |
|       | ( 49.98%) | 0.7070*   | C     | 5       | s( 31.86%) | p 2.14( 68.11%) | d 0.00( 0.03%) |         |         |
|       |           |           |       |         | 0.0001     | -0.5644         | 0.0069         | 0.0033  | 0.0000  |
|       |           |           |       |         | -0.6662    | -0.0130         | 0.0046         | 0.3364  | 0.0053  |
|       |           |           |       |         | -0.0026    | -0.3517         | -0.0096        | 0.0018  | 0.0105  |
|       |           |           |       |         | -0.0103    | 0.0041          | -0.0084        | 0.0036  |         |
|       | ( 50.02%) | -0.7072*  | C     | 51      | s( 26.67%) | p 2.75( 73.28%) | d 0.00( 0.06%) |         |         |
|       |           |           |       |         | -0.0001    | -0.5164         | -0.0015        | 0.0019  | 0.0002  |
|       |           |           |       |         | 0.7022     | -0.0010         | -0.0024        | -0.3264 | 0.0035  |
|       |           |           |       |         | 0.0000     | 0.3649          | 0.0009         | -0.0026 | 0.0128  |
|       |           |           |       |         | -0.0144    | 0.0069          | -0.0104        | 0.0054  |         |
| 1466. | (0.01486) | BD*( 1) C | 6 - C | 7       |            |                 |                |         |         |
|       | ( 49.78%) | 0.7056*   | C     | 6       | s( 36.09%) | p 1.77( 63.85%) | d 0.00( 0.05%) |         |         |
|       |           |           |       |         | 0.0000     | -0.6006         | -0.0147        | -0.0044 | -0.0001 |
|       |           |           |       |         | 0.6446     | 0.0175          | 0.0032         | -0.3477 | -0.0183 |
|       |           |           |       |         | -0.0066    | 0.3178          | -0.0155        | -0.0120 | 0.0115  |
|       |           |           |       |         | -0.0161    | 0.0067          | -0.0089        | 0.0006  |         |
|       | ( 50.22%) | -0.7086*  | C     | 7       | s( 35.95%) | p 1.78( 63.98%) | d 0.00( 0.07%) |         |         |
|       |           |           |       |         | 0.0000     | -0.5996         | -0.0077        | 0.0016  | 0.0001  |
|       |           |           |       |         | -0.6232    | -0.0103         | 0.0093         | 0.3357  | -0.0025 |
|       |           |           |       |         | -0.0091    | -0.3708         | -0.0309        | -0.0057 | 0.0182  |
|       |           |           |       |         | -0.0120    | 0.0058          | -0.0096        | 0.0073  |         |
| 1467. | (0.33555) | BD*( 2) C | 6 - C | 7       |            |                 |                |         |         |
|       | ( 48.96%) | 0.6997*   | C     | 6       | s( 0.00%)  | p 1.00( 99.98%) | d 0.00( 0.02%) |         |         |
|       |           |           |       |         | 0.0000     | -0.0015         | 0.0002         | -0.0006 | -0.0001 |
|       |           |           |       |         | -0.5570    | 0.0058          | -0.0136        | -0.7859 | 0.0076  |
|       |           |           |       |         | -0.0176    | 0.2669          | -0.0028        | 0.0054  | 0.0053  |
|       |           |           |       |         | 0.0049     | 0.0103          | 0.0058         | -0.0060 |         |
|       | ( 51.04%) | -0.7144*  | C     | 7       | s( 0.00%)  | p 1.00( 99.97%) | d 0.00( 0.03%) |         |         |
|       |           |           |       |         | 0.0000     | -0.0039         | 0.0000         | -0.0013 | -0.0001 |
|       |           |           |       |         | -0.5698    | 0.0063          | -0.0060        | -0.7800 | 0.0074  |
|       |           |           |       |         | -0.0096    | 0.2578          | -0.0028        | 0.0028  | -0.0044 |
|       |           |           |       |         | 0.0034     | -0.0027         | -0.0148        | -0.0002 |         |
| 1468. | (0.01759) | BD*( 1) C | 6 - H | 78      |            |                 |                |         |         |
|       | ( 39.24%) | 0.6264*   | C     | 6       | s( 28.07%) | p 2.56( 71.90%) | d 0.00( 0.04%) |         |         |
|       |           |           |       |         | 0.0004     | -0.5297         | 0.0109         | 0.0003  | -0.0001 |
|       |           |           |       |         | -0.1735    | 0.0082          | 0.0044         | -0.1530 | -0.0002 |
|       |           |           |       |         | 0.0007     | -0.8155         | 0.0142         | 0.0126  | -0.0010 |
|       |           |           |       |         | -0.0071    | -0.0057         | -0.0003        | -0.0168 |         |
|       | ( 60.76%) | -0.7795*  | H     | 78      | s( 99.95%) | p 0.00( 0.05%)  |                |         |         |
|       |           |           |       |         | -0.9997    | -0.0022         | -0.0013        | 0.0050  | 0.0040  |
|       |           |           |       |         | 0.0222     |                 |                |         |         |
| 1469. | (0.01498) | BD*( 1) C | 7 - C | 8       |            |                 |                |         |         |
|       | ( 50.04%) | 0.7074*   | C     | 7       | s( 36.04%) | p 1.77( 63.89%) | d 0.00( 0.06%) |         |         |
|       |           |           |       |         | 0.0000     | 0.6003          | 0.0063         | -0.0024 | -0.0002 |
|       |           |           |       |         | -0.1853    | -0.0243         | -0.0055        | -0.1213 | 0.0118  |
|       |           |           |       |         | 0.0094     | -0.7672         | -0.0174        | 0.0095  | -0.0005 |
|       |           |           |       |         | 0.0050     | 0.0105          | -0.0005        | 0.0226  |         |
|       | ( 49.96%) | -0.7069*  | C     | 8       | s( 35.83%) | p 1.79( 64.12%) | d 0.00( 0.05%) |         |         |
|       |           |           |       |         | 0.0000     | 0.5984          | 0.0139         | 0.0046  | 0.0002  |
|       |           |           |       |         | 0.1372     | -0.0176         | -0.0093        | 0.1417  | 0.0186  |
|       |           |           |       |         | 0.0098     | 0.7754          | 0.0163         | 0.0012  | -0.0001 |
|       |           |           |       |         | 0.0115     | 0.0031          | 0.0019         | 0.0191  |         |
| 1470. | (0.01576) | BD*( 1) C | 7 - H | 77      |            |                 |                |         |         |
|       | ( 39.16%) | 0.6258*   | C     | 7       | s( 27.95%) | p 2.58( 72.01%) | d 0.00( 0.03%) |         |         |
|       |           |           |       |         | -0.0004    | 0.5286          | -0.0118        | 0.0036  | 0.0003  |
|       |           |           |       |         | -0.5010    | 0.0133          | -0.0018        | 0.5131  | -0.0144 |
|       |           |           |       |         | 0.0026     | 0.4530          | -0.0128        | 0.0024  | -0.0076 |
|       |           |           |       |         | -0.0127    | 0.0092          | -0.0020        | -0.0041 |         |
|       | ( 60.84%) | -0.7800*  | H     | 77      | s( 99.95%) | p 0.00( 0.05%)  |                |         |         |
|       |           |           |       |         | 0.9997     | 0.0015          | 0.0005         | 0.0136  | -0.0141 |
|       |           |           |       |         | -0.0123    |                 |                |         |         |
| 1471. | (0.01781) | BD*( 1) C | 8 - H | 76      |            |                 |                |         |         |
|       | ( 38.92%) | 0.6238*   | C     | 8       | s( 28.24%) | p 2.54( 71.73%) | d 0.00( 0.04%) |         |         |
|       |           |           |       |         | -0.0004    | 0.5313          | -0.0108        | -0.0006 | 0.0001  |
|       |           |           |       |         | -0.6628    | 0.0102          | 0.0096         | 0.3826  | -0.0062 |
|       |           |           |       |         | -0.0030    | -0.3622         | 0.0106         | 0.0065  | -0.0115 |

0.0112 -0.0063 0.0070 -0.0039  
 ( 61.08%) -0.7816\* H 76 s( 99.95%)p 0.00( 0.05%)  
 0.9997 -0.0020 0.0015 0.0184 -0.0096  
 0.0106

1472. (0.04581) BD\*( 1) N 9 - C 10  
 ( 37.53%) 0.6126\* N 9 s( 33.77%)p 1.96( 66.17%)d 0.00( 0.05%)  
 -0.0001 0.5812 -0.0006 0.0005 0.0001  
 -0.1567 0.0128 -0.0030 -0.7937 0.0065  
 0.0042 -0.0829 -0.0075 0.0023 0.0033  
 -0.0015 0.0045 -0.0191 -0.0116  
 ( 62.47%) -0.7904\* C 10 s( 26.30%)p 2.80( 73.64%)d 0.00( 0.06%)  
 -0.0004 0.5123 0.0205 0.0092 -0.0005  
 0.0496 -0.0115 -0.0041 0.8485 0.0207  
 0.0158 0.1141 0.0057 0.0065 0.0078  
 -0.0005 0.0007 -0.0195 -0.0135

1473. (0.72110) BD\*( 2) N 9 - C 10  
 ( 23.81%) 0.4879\* N 9 s( 0.08%)p99.99( 99.90%)d 0.16( 0.01%)  
 0.0001 0.0286 -0.0055 0.0002 0.0000  
 -0.4677 -0.0066 -0.0033 0.2030 0.0001  
 0.0017 -0.8596 -0.0076 -0.0085 0.0057  
 -0.0023 0.0086 -0.0003 0.0047  
 ( 76.19%) -0.8729\* C 10 s( 0.09%)p99.99( 99.74%)d 1.76( 0.17%)  
 -0.0003 -0.0299 -0.0060 0.0037 -0.0003  
 -0.4290 0.0003 -0.0060 0.1623 0.0095  
 -0.0087 -0.8865 -0.0299 0.0064 -0.0161  
 -0.0117 -0.0336 -0.0113 -0.0020

1474. (0.03014) BD\*( 1) N 9 - C 13  
 ( 38.02%) 0.6166\* N 9 s( 31.75%)p 2.15( 68.20%)d 0.00( 0.05%)  
 0.0001 -0.5634 0.0047 -0.0013 -0.0001  
 -0.7088 0.0056 0.0011 -0.3030 0.0236  
 -0.0050 0.2953 -0.0059 0.0005 -0.0098  
 0.0129 0.0026 -0.0134 0.0081  
 ( 61.98%) -0.7873\* C 13 s( 28.26%)p 2.54( 71.68%)d 0.00( 0.05%)  
 0.0001 -0.5316 -0.0032 -0.0003 0.0016  
 0.7547 0.0287 0.0054 0.1846 -0.0096  
 -0.0080 -0.3346 -0.0139 0.0005 -0.0120  
 0.0141 0.0041 -0.0101 0.0092

1475. (0.04659) BD\*( 1) C 10 - N 11  
 ( 62.47%) 0.7904\* C 10 s( 26.68%)p 2.75( 73.25%)d 0.00( 0.07%)  
 0.0003 -0.5161 -0.0213 -0.0043 -0.0005  
 -0.6918 -0.0103 -0.0069 0.2967 0.0190  
 0.0109 0.4064 0.0119 0.0035 0.0066  
 0.0197 -0.0043 -0.0148 0.0043  
 ( 37.53%) -0.6126\* N 11 s( 34.03%)p 1.94( 65.91%)d 0.00( 0.05%)  
 0.0001 -0.5834 0.0016 0.0010 -0.0001  
 0.7080 -0.0084 -0.0014 -0.1705 -0.0128  
 0.0062 -0.3585 0.0042 0.0015 0.0095  
 0.0166 -0.0055 -0.0109 0.0048

1476. (0.02957) BD\*( 1) C 10 - B 14  
 ( 33.22%) 0.5763\* C 10 s( 46.95%)p 1.13( 53.05%)d 0.00( 0.01%)  
 -0.0001 0.6850 -0.0155 -0.0068 -0.0001  
 -0.5768 0.0305 0.0040 -0.4040 0.0161  
 0.0044 0.1823 -0.0052 -0.0044 0.0050  
 -0.0025 0.0008 0.0025 -0.0069  
 ( 66.78%) -0.8172\* B 14 s( 40.37%)p 1.48( 59.58%)d 0.00( 0.05%)  
 -0.0004 0.6352 -0.0007 0.0122 0.0023  
 0.6817 0.0097 0.0209 0.3609 0.0041  
 0.0118 -0.0061 0.0050 0.0015 0.0169  
 -0.0041 -0.0030 0.0093 -0.0109

1477. (0.02954) BD\*( 1) N 11 - C 12  
 ( 38.03%) 0.6167\* N 11 s( 31.51%)p 2.17( 68.44%)d 0.00( 0.05%)  
 0.0001 -0.5613 0.0035 0.0002 -0.0001  
 -0.5370 0.0192 -0.0027 -0.6123 0.0020  
 0.0030 0.1432 -0.0151 0.0031 -0.0183  
 0.0038 0.0031 0.0049 0.0122  
 ( 61.97%) -0.7872\* C 12 s( 28.22%)p 2.54( 71.71%)d 0.00( 0.06%)  
 0.0001 -0.5312 -0.0034 -0.0015 0.0012  
 0.4570 0.0049 -0.0039 0.7044 0.0333  
 0.0062 -0.1045 0.0039 0.0063 -0.0193  
 0.0078 0.0050 0.0033 0.0130

1478. (0.03975) BD\*( 1) N 11 - C 41

( 37.63%) 0.6135\* N 11 s( 34.36%)p 1.91( 65.60%)d 0.00( 0.04%)  
0.0001 -0.5862 -0.0010 -0.0012 0.0002  
-0.2057 -0.0034 0.0033 0.7610 0.0028  
-0.0091 0.1858 0.0035 -0.0033 0.0086  
0.0031 -0.0054 0.0132 0.0101

( 62.37%) -0.7897\* C 41 s( 26.52%)p 2.77( 73.36%)d 0.00( 0.12%)  
0.0002 -0.5149 -0.0047 -0.0051 0.0006  
0.2723 0.0053 -0.0002 -0.7932 0.0014  
-0.0077 -0.1726 0.0195 -0.0063 0.0216  
-0.0013 0.0086 0.0195 0.0170

1479. (0.45441) BD\*( 2) N 11 - C 41  
( 1.54%) 0.1241\* N 11 s( 0.05%)p99.99( 99.95%)d 0.07( 0.00%)  
0.0002 0.0219 -0.0041 0.0000 0.0000  
-0.4088 -0.0051 -0.0039 0.1270 -0.0003  
0.0017 -0.9034 -0.0040 -0.0089 -0.0025  
-0.0014 -0.0047 0.0000 -0.0026

( 98.46%) -0.9923\* C 41 s( 1.14%)p58.44( 66.45%)d28.50( 32.41%)  
-0.0006 -0.0261 -0.0961 -0.0380 -0.0044  
-0.2042 -0.1381 0.0950 0.0584 0.0396  
-0.0642 -0.6365 -0.4107 0.1088 -0.2537  
0.0832 -0.4746 -0.0335 -0.1627

1480. (0.00980) BD\*( 1) C 12 - C 13  
( 50.01%) 0.7072\* C 12 s( 37.54%)p 1.66( 62.40%)d 0.00( 0.05%)  
0.0000 0.6126 0.0104 0.0031 0.0006  
-0.2903 0.0129 0.0145 0.6870 0.0316  
0.0095 0.2575 -0.0015 -0.0065 -0.0138  
-0.0098 0.0116 -0.0063 -0.0088

( 49.99%) -0.7070\* C 13 s( 37.53%)p 1.66( 62.42%)d 0.00( 0.05%)  
0.0000 0.6125 0.0100 0.0033 0.0007  
0.4344 0.0312 0.0123 -0.5810 0.0004  
0.0120 -0.3106 -0.0146 -0.0068 -0.0117  
-0.0077 0.0113 -0.0105 -0.0100

1481. (0.28111) BD\*( 2) C 12 - C 13  
( 50.00%) 0.7071\* C 12 s( 0.00%)p 1.00( 99.94%)d 0.00( 0.06%)  
0.0000 -0.0008 -0.0050 0.0014 0.0001  
0.4327 -0.0088 -0.0005 -0.1495 0.0032  
0.0009 0.8884 -0.0214 0.0006 0.0094  
-0.0085 0.0127 -0.0041 0.0156

( 50.00%) -0.7071\* C 13 s( 0.00%)p 1.00( 99.94%)d 0.00( 0.06%)  
0.0000 0.0009 -0.0060 0.0030 0.0001  
0.4317 -0.0092 0.0002 -0.1515 0.0050  
-0.0009 0.8886 -0.0207 -0.0004 -0.0107  
0.0030 -0.0186 0.0000 -0.0108

1482. (0.01213) BD\*( 1) C 12 - H 71  
( 38.05%) 0.6168\* C 12 s( 34.17%)p 1.93( 65.81%)d 0.00( 0.02%)  
0.0003 -0.5845 0.0079 0.0037 -0.0002  
-0.7203 0.0114 -0.0016 0.0807 -0.0051  
-0.0116 0.3639 -0.0070 -0.0004 0.0028  
0.0105 -0.0017 -0.0096 0.0034

( 61.95%) -0.7871\* H 71 s( 99.93%)p 0.00( 0.07%)  
-0.9997 -0.0018 -0.0002 0.0228 -0.0029  
-0.0117

1483. (0.01229) BD\*( 1) C 13 - H 72  
( 38.06%) 0.6169\* C 13 s( 34.15%)p 1.93( 65.83%)d 0.00( 0.02%)  
0.0003 -0.5843 0.0076 0.0032 -0.0005  
-0.2301 0.0005 -0.0092 -0.7776 0.0141  
0.0024 -0.0202 0.0012 0.0069 -0.0068  
0.0005 -0.0012 0.0107 0.0079

( 61.94%) -0.7870\* H 72 s( 99.93%)p 0.00( 0.07%)  
-0.9997 -0.0018 -0.0003 0.0071 0.0249  
0.0005

1484. (0.04014) BD\*( 1) B 14 - B 15  
( 50.00%) 0.7071\* B 14 s( 41.46%)p 1.41( 58.51%)d 0.00( 0.02%)  
0.0003 0.6439 0.0009 -0.0079 -0.0014  
-0.3842 -0.0057 0.0086 -0.3996 0.0034  
0.0018 0.5269 -0.0074 0.0050 0.0076  
0.0007 0.0047 0.0094 -0.0089

( 50.00%) -0.7071\* B 15 s( 35.85%)p 1.79( 64.13%)d 0.00( 0.02%)  
0.0005 0.5986 0.0042 -0.0098 -0.0020  
0.7256 -0.0099 -0.0112 0.1869 -0.0087  
-0.0056 0.2817 0.0076 0.0063 0.0093

-0.0066 -0.0034 0.0077 -0.0060  
 1485. (0.05483) BD\*( 1) B 15 - C 16  
 ( 66.05%) 0.8127\* B 15 s( 37.77%)p 1.65( 62.19%)d 0.00( 0.04%)  
 -0.0012 0.6145 0.0018 0.0069 0.0010  
 -0.5565 0.0034 -0.0173 -0.3990 0.0015  
 -0.0123 0.3904 0.0032 0.0120 0.0138  
 -0.0106 -0.0073 0.0053 -0.0034  
 ( 33.95%) -0.5827\* C 16 s( 46.89%)p 1.13( 53.11%)d 0.00( 0.01%)  
 0.0000 0.6845 -0.0171 -0.0050 0.0001  
 0.5370 -0.0245 -0.0049 0.4029 -0.0194  
 -0.0035 -0.2812 0.0163 0.0008 0.0037  
 -0.0034 -0.0045 0.0027 -0.0010  
 1486. (0.04814) BD\*( 1) C 16 - N 17  
 ( 62.95%) 0.7934\* C 16 s( 26.30%)p 2.80( 73.63%)d 0.00( 0.07%)  
 -0.0004 0.5122 0.0236 0.0037 -0.0003  
 -0.8032 -0.0162 -0.0108 -0.0083 0.0092  
 0.0049 -0.3003 -0.0176 -0.0091 0.0067  
 0.0107 0.0011 0.0214 -0.0115  
 ( 37.05%) -0.6087\* N 17 s( 34.38%)p 1.91( 65.56%)d 0.00( 0.06%)  
 -0.0001 0.5864 -0.0022 -0.0015 0.0001  
 0.7863 -0.0066 -0.0019 0.0549 -0.0116  
 0.0031 0.1846 0.0087 -0.0045 0.0012  
 0.0131 -0.0012 0.0179 -0.0081  
 1487. (0.60501) BD\*( 2) C 16 - N 17  
 ( 74.06%) 0.8606\* C 16 s( 0.07%)p99.99( 99.77%)d 2.47( 0.16%)  
 0.0001 0.0253 0.0036 -0.0009 0.0004  
 -0.2338 -0.0032 -0.0016 0.7218 0.0263  
 -0.0108 0.6489 0.0149 -0.0030 -0.0258  
 -0.0251 -0.0090 0.0145 -0.0061  
 ( 25.94%) -0.5093\* N 17 s( 0.02%)p99.99( 99.96%)d 0.83( 0.02%)  
 0.0000 -0.0143 0.0040 -0.0006 0.0000  
 -0.1986 -0.0038 -0.0022 0.7039 0.0040  
 0.0076 0.6816 0.0057 0.0065 0.0077  
 0.0049 0.0034 0.0004 0.0094  
 1488. (0.05247) BD\*( 1) C 16 - N 20  
 ( 62.98%) 0.7936\* C 16 s( 26.80%)p 2.73( 73.13%)d 0.00( 0.07%)  
 -0.0003 0.5170 0.0259 0.0042 -0.0001  
 0.0963 0.0178 0.0088 -0.5605 -0.0103  
 -0.0076 0.6379 0.0143 0.0130 0.0019  
 -0.0022 -0.0231 -0.0113 0.0068  
 ( 37.02%) -0.6085\* N 20 s( 34.60%)p 1.89( 65.35%)d 0.00( 0.05%)  
 -0.0001 0.5882 -0.0036 -0.0020 0.0001  
 0.0229 -0.0153 0.0047 0.5448 -0.0081  
 -0.0012 -0.5965 0.0009 0.0033 -0.0013  
 0.0028 -0.0204 -0.0079 0.0071  
 1489. (0.03043) BD\*( 1) N 17 - C 18  
 ( 38.06%) 0.6169\* N 17 s( 31.37%)p 2.19( 68.57%)d 0.00( 0.05%)  
 0.0001 -0.5601 0.0057 0.0000 -0.0001  
 0.4787 -0.0226 0.0035 0.5294 -0.0078  
 -0.0015 -0.4191 -0.0062 0.0032 -0.0129  
 0.0110 0.0158 0.0027 0.0006  
 ( 61.94%) -0.7870\* C 18 s( 28.59%)p 2.50( 71.35%)d 0.00( 0.07%)  
 0.0001 -0.5346 -0.0044 -0.0015 0.0011  
 -0.3761 0.0019 0.0064 -0.5764 -0.0225  
 -0.0011 0.4884 0.0260 0.0067 -0.0166  
 0.0107 0.0163 0.0000 0.0038  
 1490. (0.04192) BD\*( 1) N 17 - C 21  
 ( 36.89%) 0.6074\* N 17 s( 34.18%)p 1.92( 65.78%)d 0.00( 0.03%)  
 0.0001 -0.5846 -0.0029 -0.0013 0.0001  
 0.3348 0.0051 -0.0045 -0.4695 -0.0027  
 0.0052 0.5702 0.0066 -0.0070 0.0074  
 -0.0091 0.0141 0.0023 -0.0024  
 ( 63.11%) -0.7944\* C 21 s( 25.90%)p 2.86( 74.02%)d 0.00( 0.07%)  
 0.0002 -0.5088 -0.0080 -0.0075 0.0006  
 -0.3843 -0.0033 -0.0051 0.5020 -0.0002  
 0.0066 -0.5834 -0.0058 -0.0075 0.0121  
 -0.0132 0.0184 0.0049 -0.0059  
 1491. (0.00978) BD\*( 1) C 18 - C 19  
 ( 50.03%) 0.7073\* C 18 s( 37.04%)p 1.70( 62.91%)d 0.00( 0.05%)  
 0.0000 -0.6085 -0.0095 -0.0027 -0.0007  
 -0.4291 0.0111 0.0143 0.3778 0.0241

|       |           |          |             |            |                 |                |         |         |
|-------|-----------|----------|-------------|------------|-----------------|----------------|---------|---------|
|       |           |          |             | 0.0094     | -0.5484         | -0.0219        | -0.0041 | 0.0081  |
|       |           |          |             | -0.0167    | 0.0116          | -0.0080        | -0.0012 |         |
|       | ( 49.97%) | -0.7069* | C 19        | s( 37.19%) | p 1.69( 62.76%) | d 0.00( 0.05%) |         |         |
|       |           |          |             | 0.0000     | -0.6097         | -0.0092        | -0.0028 | -0.0006 |
|       |           |          |             | 0.5697     | 0.0334          | 0.0103         | -0.2598 | 0.0086  |
|       |           |          |             | 0.0130     | 0.4838          | 0.0013         | -0.0070 | 0.0083  |
|       |           |          |             | -0.0153    | 0.0146          | -0.0040        | -0.0036 |         |
| 1492. | (0.28227) | BD*( 2)  | C 18 - C 19 |            |                 |                |         |         |
|       | ( 50.33%) | 0.7095*  | C 18        | s( 0.00%)  | p 1.00( 99.94%) | d 0.00( 0.06%) |         |         |
|       |           |          |             | 0.0000     | 0.0007          | -0.0023        | 0.0012  | 0.0001  |
|       |           |          |             | -0.2259    | 0.0043          | 0.0000         | 0.7106  | -0.0159 |
|       |           |          |             | 0.0003     | 0.6655          | -0.0144        | 0.0008  | 0.0156  |
|       |           |          |             | 0.0102     | 0.0056          | -0.0009        | 0.0149  |         |
|       | ( 49.67%) | -0.7047* | C 19        | s( 0.00%)  | p 1.00( 99.94%) | d 0.00( 0.06%) |         |         |
|       |           |          |             | 0.0000     | 0.0027          | -0.0028        | 0.0019  | 0.0001  |
|       |           |          |             | -0.2352    | 0.0051          | -0.0005        | 0.7109  | -0.0170 |
|       |           |          |             | 0.0014     | 0.6620          | -0.0139        | 0.0000  | -0.0099 |
|       |           |          |             | -0.0021    | -0.0036         | -0.0074        | -0.0203 |         |
| 1493. | (0.01214) | BD*( 1)  | C 18 - H 63 |            |                 |                |         |         |
|       | ( 37.80%) | 0.6148*  | C 18        | s( 34.32%) | p 1.91( 65.66%) | d 0.00( 0.02%) |         |         |
|       |           |          |             | -0.0003    | 0.5857          | -0.0077        | -0.0033 | 0.0002  |
|       |           |          |             | -0.7890    | 0.0146          | -0.0005        | -0.1341 | 0.0003  |
|       |           |          |             | -0.0085    | -0.1252         | 0.0058         | 0.0082  | 0.0036  |
|       |           |          |             | 0.0043     | 0.0000          | 0.0120         | -0.0068 |         |
|       | ( 62.20%) | -0.7886* | H 63        | s( 99.93%) | p 0.00( 0.07%)  |                |         |         |
|       |           |          |             | 0.9997     | 0.0018          | 0.0002         | 0.0252  | 0.0037  |
|       |           |          |             | 0.0045     |                 |                |         |         |
| 1494. | (0.03069) | BD*( 1)  | C 19 - N 20 |            |                 |                |         |         |
|       | ( 62.02%) | 0.7875*  | C 19        | s( 28.42%) | p 2.52( 71.51%) | d 0.00( 0.07%) |         |         |
|       |           |          |             | -0.0001    | 0.5331          | 0.0043         | 0.0013  | -0.0012 |
|       |           |          |             | 0.7774     | 0.0331          | 0.0053         | 0.3228  | 0.0004  |
|       |           |          |             | -0.0070    | -0.0726         | 0.0095         | 0.0051  | 0.0178  |
|       |           |          |             | -0.0061    | -0.0073         | 0.0116         | -0.0109 |         |
|       | ( 37.98%) | -0.6163* | N 20        | s( 31.27%) | p 2.20( 68.68%) | d 0.00( 0.05%) |         |         |
|       |           |          |             | -0.0001    | 0.5592          | -0.0037        | 0.0003  | 0.0001  |
|       |           |          |             | -0.7108    | 0.0036          | 0.0032         | -0.3916 | 0.0201  |
|       |           |          |             | -0.0033    | 0.1659          | -0.0141        | 0.0029  | 0.0148  |
|       |           |          |             | -0.0045    | -0.0036         | 0.0134         | -0.0104 |         |
| 1495. | (0.01258) | BD*( 1)  | C 19 - H 64 |            |                 |                |         |         |
|       | ( 37.87%) | 0.6154*  | C 19        | s( 34.33%) | p 1.91( 65.65%) | d 0.00( 0.02%) |         |         |
|       |           |          |             | -0.0003    | 0.5858          | -0.0073        | -0.0033 | 0.0002  |
|       |           |          |             | -0.1129    | -0.0021         | -0.0106        | -0.5674 | 0.0108  |
|       |           |          |             | -0.0028    | 0.5669          | -0.0110        | -0.0037 | 0.0022  |
|       |           |          |             | -0.0018    | -0.0130         | -0.0057        | 0.0036  |         |
|       | ( 62.13%) | -0.7882* | H 64        | s( 99.93%) | p 0.00( 0.07%)  |                |         |         |
|       |           |          |             | 0.9997     | 0.0019          | 0.0002         | 0.0030  | 0.0183  |
|       |           |          |             | -0.0182    |                 |                |         |         |
| 1496. | (0.04104) | BD*( 1)  | N 20 - C 31 |            |                 |                |         |         |
|       | ( 37.22%) | 0.6101*  | N 20        | s( 34.08%) | p 1.93( 65.89%) | d 0.00( 0.04%) |         |         |
|       |           |          |             | 0.0001     | -0.5838         | -0.0027        | -0.0017 | 0.0002  |
|       |           |          |             | -0.6545    | -0.0049         | 0.0078         | 0.1638  | 0.0043  |
|       |           |          |             | -0.0023    | -0.4511         | -0.0052        | 0.0056  | 0.0032  |
|       |           |          |             | -0.0152    | 0.0046          | -0.0103        | -0.0002 |         |
|       | ( 62.78%) | -0.7923* | C 31        | s( 26.18%) | p 2.82( 73.75%) | d 0.00( 0.07%) |         |         |
|       |           |          |             | 0.0002     | -0.5116         | -0.0082        | -0.0071 | 0.0004  |
|       |           |          |             | 0.6697     | 0.0030          | 0.0076         | -0.1648 | -0.0037 |
|       |           |          |             | -0.0014    | 0.5115          | 0.0015         | 0.0063  | 0.0069  |
|       |           |          |             | -0.0213    | 0.0037          | -0.0136        | -0.0005 |         |
| 1497. | (0.03442) | BD*( 1)  | C 21 - C 22 |            |                 |                |         |         |
|       | ( 49.11%) | 0.7008*  | C 21        | s( 37.14%) | p 1.69( 62.82%) | d 0.00( 0.05%) |         |         |
|       |           |          |             | 0.0002     | -0.6094         | 0.0012         | 0.0033  | -0.0001 |
|       |           |          |             | -0.0162    | 0.0063          | 0.0045         | 0.2457  | -0.0018 |
|       |           |          |             | 0.0007     | 0.7533          | 0.0054         | -0.0006 | 0.0014  |
|       |           |          |             | -0.0002    | -0.0119         | 0.0035         | -0.0176 |         |
|       | ( 50.89%) | -0.7133* | C 22        | s( 33.53%) | p 1.98( 66.42%) | d 0.00( 0.06%) |         |         |
|       |           |          |             | 0.0000     | -0.5790         | -0.0030        | 0.0011  | 0.0000  |
|       |           |          |             | -0.0120    | 0.0097          | 0.0007         | -0.2101 | -0.0098 |
|       |           |          |             | 0.0023     | -0.7872         | -0.0007        | -0.0016 | 0.0018  |
|       |           |          |             | 0.0009     | -0.0108         | 0.0026         | -0.0206 |         |
| 1498. | (0.03531) | BD*( 1)  | C 21 - C 26 |            |                 |                |         |         |
|       | ( 49.51%) | 0.7036*  | C 21        | s( 36.89%) | p 1.71( 63.07%) | d 0.00( 0.05%) |         |         |

|       |           |            |                                            |         |         |         |         |         |
|-------|-----------|------------|--------------------------------------------|---------|---------|---------|---------|---------|
|       |           |            |                                            | 0.0002  | -0.6073 | 0.0019  | 0.0025  | -0.0002 |
|       |           |            |                                            | 0.3615  | 0.0084  | 0.0040  | -0.6531 | -0.0045 |
|       |           |            |                                            | -0.0017 | -0.2708 | 0.0021  | 0.0000  | 0.0152  |
|       |           |            |                                            | 0.0061  | -0.0106 | 0.0082  | 0.0049  |         |
|       | ( 50.49%) | -0.7105* C | 26 s( 34.11%)p 1.93( 65.83%)d 0.00( 0.05%) | 0.0000  | -0.5841 | -0.0031 | 0.0005  | 0.0000  |
|       |           |            |                                            | -0.3858 | 0.0048  | 0.0013  | 0.6772  | 0.0003  |
|       |           |            |                                            | 0.0011  | 0.2253  | 0.0121  | -0.0031 | 0.0157  |
|       |           |            |                                            | 0.0053  | -0.0105 | 0.0099  | 0.0063  |         |
| 1499. | (0.38598) | BD*( 2) C  | 21 - C 26                                  |         |         |         |         |         |
|       | ( 46.03%) | 0.6785* C  | 21 s( 0.04%)p99.99( 99.94%)d 0.56( 0.02%)  | -0.0002 | -0.0165 | -0.0091 | 0.0003  | 0.0003  |
|       |           |            |                                            | -0.8489 | 0.0014  | 0.0054  | -0.5104 | 0.0067  |
|       |           |            |                                            | 0.0051  | 0.1348  | -0.0024 | -0.0031 | -0.0047 |
|       |           |            |                                            | -0.0029 | 0.0004  | 0.0130  | -0.0003 |         |
|       | ( 53.97%) | -0.7346* C | 26 s( 0.00%)p 1.00( 99.95%)d 0.00( 0.05%)  | 0.0000  | -0.0009 | -0.0057 | 0.0020  | 0.0002  |
|       |           |            |                                            | -0.8387 | 0.0097  | 0.0036  | -0.5255 | 0.0027  |
|       |           |            |                                            | -0.0014 | 0.1409  | -0.0020 | -0.0018 | 0.0098  |
|       |           |            |                                            | 0.0126  | 0.0052  | -0.0135 | -0.0036 |         |
| 1500. | (0.02275) | BD*( 1) C  | 22 - C 23                                  |         |         |         |         |         |
|       | ( 49.55%) | 0.7039* C  | 22 s( 34.21%)p 1.92( 65.75%)d 0.00( 0.05%) | 0.0001  | -0.5848 | -0.0089 | -0.0043 | -0.0003 |
|       |           |            |                                            | 0.3818  | 0.0038  | 0.0048  | -0.4604 | -0.0050 |
|       |           |            |                                            | 0.0007  | 0.5473  | -0.0078 | 0.0115  | 0.0122  |
|       |           |            |                                            | -0.0121 | 0.0123  | 0.0026  | -0.0031 |         |
|       | ( 50.45%) | -0.7103* C | 23 s( 35.86%)p 1.79( 64.08%)d 0.00( 0.06%) | -0.0001 | -0.5988 | 0.0004  | 0.0041  | 0.0003  |
|       |           |            |                                            | -0.3862 | -0.0115 | 0.0045  | 0.4769  | 0.0167  |
|       |           |            |                                            | -0.0050 | -0.5135 | 0.0026  | 0.0092  | 0.0134  |
|       |           |            |                                            | -0.0132 | 0.0150  | 0.0037  | -0.0054 |         |
| 1501. | (0.32447) | BD*( 2) C  | 22 - C 23                                  |         |         |         |         |         |
|       | ( 51.69%) | 0.7190* C  | 22 s( 0.02%)p99.99( 99.94%)d 1.71( 0.03%)  | -0.0002 | -0.0062 | -0.0128 | 0.0010  | 0.0006  |
|       |           |            |                                            | -0.8456 | 0.0042  | -0.0024 | -0.5105 | 0.0073  |
|       |           |            |                                            | 0.0028  | 0.1537  | -0.0064 | -0.0038 | -0.0065 |
|       |           |            |                                            | 0.0004  | 0.0033  | 0.0172  | -0.0010 |         |
|       | ( 48.31%) | -0.6950* C | 23 s( 0.00%)p 1.00( 99.96%)d 0.00( 0.03%)  | 0.0000  | -0.0001 | -0.0045 | 0.0001  | 0.0001  |
|       |           |            |                                            | -0.8394 | 0.0021  | -0.0147 | -0.5229 | 0.0037  |
|       |           |            |                                            | -0.0117 | 0.1459  | 0.0003  | 0.0029  | 0.0013  |
|       |           |            |                                            | -0.0134 | -0.0097 | -0.0065 | 0.0038  |         |
| 1502. | (0.03210) | BD*( 1) C  | 22 - C 27                                  |         |         |         |         |         |
|       | ( 49.80%) | 0.7057* C  | 22 s( 32.22%)p 2.10( 67.75%)d 0.00( 0.03%) | 0.0001  | -0.5676 | 0.0058  | 0.0042  | 0.0003  |
|       |           |            |                                            | -0.3719 | -0.0040 | 0.0033  | 0.6945  | 0.0166  |
|       |           |            |                                            | -0.0064 | 0.2375  | 0.0045  | 0.0009  | 0.0117  |
|       |           |            |                                            | 0.0025  | -0.0067 | 0.0096  | 0.0059  |         |
|       | ( 50.20%) | -0.7085* C | 27 s( 26.68%)p 2.75( 73.27%)d 0.00( 0.06%) | -0.0001 | -0.5165 | -0.0001 | 0.0014  | -0.0005 |
|       |           |            |                                            | 0.3744  | -0.0052 | -0.0001 | -0.7310 | -0.0012 |
|       |           |            |                                            | 0.0007  | -0.2409 | -0.0001 | 0.0030  | 0.0156  |
|       |           |            |                                            | 0.0057  | -0.0105 | 0.0102  | 0.0090  |         |
| 1503. | (0.01470) | BD*( 1) C  | 23 - C 24                                  |         |         |         |         |         |
|       | ( 49.89%) | 0.7064* C  | 23 s( 35.87%)p 1.79( 64.07%)d 0.00( 0.05%) | 0.0000  | -0.5988 | -0.0135 | -0.0054 | -0.0002 |
|       |           |            |                                            | 0.3811  | 0.0137  | 0.0036  | -0.6705 | -0.0165 |
|       |           |            |                                            | -0.0022 | -0.2117 | 0.0198  | 0.0137  | 0.0142  |
|       |           |            |                                            | 0.0065  | -0.0133 | 0.0091  | 0.0040  |         |
|       | ( 50.11%) | -0.7079* C | 24 s( 35.96%)p 1.78( 63.97%)d 0.00( 0.07%) | 0.0000  | -0.5996 | -0.0058 | 0.0020  | 0.0002  |
|       |           |            |                                            | -0.3654 | -0.0027 | 0.0084  | 0.6618  | 0.0113  |
|       |           |            |                                            | -0.0099 | 0.2588  | 0.0295  | 0.0077  | 0.0197  |
|       |           |            |                                            | 0.0032  | -0.0067 | 0.0111  | 0.0102  |         |
| 1504. | (0.01740) | BD*( 1) C  | 23 - H 67                                  |         |         |         |         |         |
|       | ( 38.93%) | 0.6239* C  | 23 s( 28.23%)p 2.54( 71.73%)d 0.00( 0.04%) | -0.0004 | 0.5312  | -0.0109 | -0.0014 | 0.0001  |
|       |           |            |                                            | -0.0058 | 0.0002  | -0.0024 | -0.2188 | 0.0095  |
|       |           |            |                                            | 0.0046  | -0.8179 | 0.0147  | 0.0124  | -0.0002 |
|       |           |            |                                            | 0.0002  | 0.0087  | -0.0015 | 0.0168  |         |
|       | ( 61.07%) | -0.7815* H | 67 s( 99.94%)p 0.00( 0.06%)                |         |         |         |         |         |

|       |           |         |               |            |                 |                |         |         |
|-------|-----------|---------|---------------|------------|-----------------|----------------|---------|---------|
|       |           |         |               | 0.9997     | -0.0017         | 0.0014         | -0.0015 | 0.0058  |
|       |           |         |               | 0.0227     |                 |                |         |         |
| 1505. | (0.01474) | BD*( 1) | C 24 - C 25   |            |                 |                |         |         |
|       | ( 50.24%) |         | 0.7088* C 24  | s( 35.96%) | p 1.78( 63.97%) | d 0.00( 0.07%) |         |         |
|       |           |         |               | 0.0000     | -0.5996         | -0.0080        | 0.0020  | 0.0001  |
|       |           |         |               | 0.0142     | 0.0136          | 0.0068         | -0.2360 | -0.0263 |
|       |           |         |               | -0.0060    | -0.7633         | -0.0136        | 0.0116  | 0.0014  |
|       |           |         |               | -0.0031    | -0.0075         | 0.0015         | -0.0243 |         |
|       | ( 49.76%) |         | -0.7054* C 25 | s( 36.10%) | p 1.77( 63.85%) | d 0.00( 0.05%) |         |         |
|       |           |         |               | 0.0000     | -0.6007         | -0.0144        | -0.0044 | -0.0001 |
|       |           |         |               | 0.0185     | 0.0138          | 0.0087         | 0.1930  | -0.0170 |
|       |           |         |               | -0.0104    | 0.7744          | 0.0202         | 0.0033  | 0.0022  |
|       |           |         |               | 0.0021     | -0.0135         | 0.0033         | -0.0176 |         |
| 1506. | (0.33515) | BD*( 2) | C 24 - C 25   |            |                 |                |         |         |
|       | ( 51.15%) |         | 0.7152* C 24  | s( 0.00%)  | p 1.00( 99.97%) | d 0.00( 0.03%) |         |         |
|       |           |         |               | 0.0000     | 0.0002          | 0.0031         | -0.0021 | 0.0001  |
|       |           |         |               | 0.8406     | -0.0071         | 0.0095         | 0.5212  | -0.0042 |
|       |           |         |               | 0.0054     | -0.1457         | 0.0013         | -0.0018 | 0.0007  |
|       |           |         |               | 0.0125     | 0.0084          | 0.0044         | -0.0043 |         |
|       | ( 48.85%) |         | -0.6989* C 25 | s( 0.00%)  | p 1.00( 99.98%) | d 0.00( 0.02%) |         |         |
|       |           |         |               | 0.0001     | 0.0006          | 0.0011         | -0.0012 | -0.0003 |
|       |           |         |               | 0.8397     | -0.0082         | 0.0181         | 0.5214  | -0.0050 |
|       |           |         |               | 0.0106     | -0.1495         | -0.0003        | -0.0033 | -0.0059 |
|       |           |         |               | -0.0092    | -0.0038         | 0.0092         | 0.0025  |         |
| 1507. | (0.01546) | BD*( 1) | C 24 - H 66   |            |                 |                |         |         |
|       | ( 39.10%) |         | 0.6253* C 24  | s( 28.03%) | p 2.57( 71.94%) | d 0.00( 0.03%) |         |         |
|       |           |         |               | 0.0004     | -0.5293         | 0.0115         | -0.0035 | -0.0003 |
|       |           |         |               | 0.3984     | -0.0123         | 0.0025         | -0.4827 | 0.0132  |
|       |           |         |               | -0.0020    | 0.5719          | -0.0153        | 0.0022  | 0.0045  |
|       |           |         |               | -0.0098    | 0.0143          | -0.0006        | -0.0005 |         |
|       | ( 60.90%) |         | -0.7804* H 66 | s( 99.95%) | p 0.00( 0.05%)  |                |         |         |
|       |           |         |               | -0.9997    | -0.0014         | -0.0005        | -0.0106 | 0.0132  |
|       |           |         |               | -0.0158    |                 |                |         |         |
| 1508. | (0.02276) | BD*( 1) | C 25 - C 26   |            |                 |                |         |         |
|       | ( 50.63%) |         | 0.7116* C 25  | s( 35.74%) | p 1.80( 64.20%) | d 0.00( 0.06%) |         |         |
|       |           |         |               | 0.0001     | 0.5978          | -0.0017        | -0.0044 | -0.0001 |
|       |           |         |               | 0.3694     | 0.0031          | -0.0060        | -0.4342 | 0.0022  |
|       |           |         |               | 0.0071     | 0.5626          | 0.0199         | -0.0057 | -0.0129 |
|       |           |         |               | 0.0134     | -0.0148         | -0.0033        | 0.0060  |         |
|       | ( 49.37%) |         | -0.7026* C 26 | s( 33.98%) | p 1.94( 65.97%) | d 0.00( 0.05%) |         |         |
|       |           |         |               | -0.0002    | 0.5828          | 0.0099         | 0.0029  | 0.0001  |
|       |           |         |               | -0.3836    | 0.0037          | -0.0077        | 0.4652  | -0.0079 |
|       |           |         |               | 0.0077     | -0.5441         | -0.0034        | 0.0000  | -0.0110 |
|       |           |         |               | 0.0119     | -0.0127         | -0.0023        | 0.0058  |         |
| 1509. | (0.01723) | BD*( 1) | C 25 - H 65   |            |                 |                |         |         |
|       | ( 39.19%) |         | 0.6260* C 25  | s( 28.12%) | p 2.55( 71.84%) | d 0.00( 0.04%) |         |         |
|       |           |         |               | 0.0004     | -0.5302         | 0.0105         | 0.0004  | -0.0001 |
|       |           |         |               | 0.3966     | -0.0066         | -0.0044        | -0.7080 | 0.0112  |
|       |           |         |               | 0.0105     | -0.2439         | 0.0108         | 0.0055  | 0.0129  |
|       |           |         |               | 0.0046     | -0.0083         | 0.0079         | 0.0066  |         |
|       | ( 60.81%) |         | -0.7798* H 65 | s( 99.95%) | p 0.00( 0.05%)  |                |         |         |
|       |           |         |               | -0.9997    | -0.0020         | -0.0013        | -0.0105 | 0.0195  |
|       |           |         |               | 0.0069     |                 |                |         |         |
| 1510. | (0.03221) | BD*( 1) | C 26 - C 29   |            |                 |                |         |         |
|       | ( 49.95%) |         | 0.7068* C 26  | s( 31.88%) | p 2.14( 68.09%) | d 0.00( 0.03%) |         |         |
|       |           |         |               | 0.0001     | -0.5645         | 0.0074         | 0.0031  | 0.0002  |
|       |           |         |               | 0.0045     | 0.0027          | 0.0007         | -0.2195 | -0.0065 |
|       |           |         |               | 0.0004     | -0.7952         | -0.0162        | 0.0049  | 0.0013  |
|       |           |         |               | 0.0000     | -0.0072         | 0.0015         | -0.0161 |         |
|       | ( 50.05%) |         | -0.7075* C 29 | s( 26.68%) | p 2.75( 73.27%) | d 0.00( 0.06%) |         |         |
|       |           |         |               | -0.0001    | -0.5165         | -0.0016        | 0.0017  | 0.0001  |
|       |           |         |               | -0.0141    | -0.0025         | 0.0022         | 0.2394  | 0.0010  |
|       |           |         |               | -0.0018    | 0.8217          | -0.0018        | -0.0030 | 0.0001  |
|       |           |         |               | 0.0005     | -0.0113         | 0.0015         | -0.0206 |         |
| 1511. | (0.01812) | BD*( 1) | C 27 - C 28   |            |                 |                |         |         |
|       | ( 49.51%) |         | 0.7037* C 27  | s( 25.54%) | p 2.91( 74.42%) | d 0.00( 0.04%) |         |         |
|       |           |         |               | 0.0001     | -0.5053         | 0.0112         | -0.0022 | 0.0001  |
|       |           |         |               | 0.5593     | -0.0005         | 0.0003         | 0.6556  | 0.0122  |
|       |           |         |               | 0.0041     | -0.0376         | -0.0039        | -0.0008 | -0.0172 |
|       |           |         |               | 0.0017     | 0.0010          | 0.0006         | 0.0104  |         |
|       | ( 50.49%) |         | -0.7105* C 28 | s( 29.27%) | p 2.41( 70.68%) | d 0.00( 0.04%) |         |         |

|       |           |          |             |                                         |         |         |         |         |         |
|-------|-----------|----------|-------------|-----------------------------------------|---------|---------|---------|---------|---------|
|       |           |          |             |                                         | -0.0004 | -0.5407 | 0.0193  | 0.0030  | -0.0001 |
|       |           |          |             |                                         | -0.5458 | -0.0107 | 0.0077  | -0.6389 | -0.0071 |
|       |           |          |             |                                         | 0.0132  | 0.0176  | 0.0006  | -0.0013 | -0.0179 |
|       |           |          |             |                                         | 0.0005  | 0.0007  | 0.0031  | 0.0107  |         |
| 1512. | (0.01403) | BD*( 1)  | C 27 - C 62 |                                         |         |         |         |         |         |
|       | ( 48.57%) | 0.6969*  | C 27        | s( 26.93%)p 2.71( 73.03%)d 0.00( 0.04%) |         |         |         |         |         |
|       |           |          |             |                                         | -0.0001 | 0.5188  | -0.0115 | 0.0033  | -0.0002 |
|       |           |          |             |                                         | 0.3401  | 0.0136  | 0.0031  | 0.0651  | -0.0020 |
|       |           |          |             |                                         | -0.0012 | -0.7811 | 0.0053  | -0.0039 | 0.0016  |
|       |           |          |             |                                         | -0.0112 | -0.0022 | 0.0017  | 0.0153  |         |
|       | ( 51.43%) | -0.7172* | C 62        | s( 28.50%)p 2.51( 71.45%)d 0.00( 0.05%) |         |         |         |         |         |
|       |           |          |             |                                         | 0.0003  | 0.5334  | -0.0218 | -0.0029 | 0.0000  |
|       |           |          |             |                                         | -0.3602 | -0.0039 | 0.0095  | -0.0533 | -0.0064 |
|       |           |          |             |                                         | 0.0003  | 0.7625  | 0.0130  | -0.0123 | 0.0009  |
|       |           |          |             |                                         | -0.0153 | -0.0027 | 0.0038  | 0.0157  |         |
| 1513. | (0.02449) | BD*( 1)  | C 27 - H 84 |                                         |         |         |         |         |         |
|       | ( 38.38%) | 0.6195*  | C 27        | s( 20.90%)p 3.78( 79.05%)d 0.00( 0.05%) |         |         |         |         |         |
|       |           |          |             |                                         | 0.0002  | -0.4567 | -0.0204 | 0.0043  | 0.0001  |
|       |           |          |             |                                         | -0.6559 | 0.0047  | 0.0021  | 0.1755  | -0.0063 |
|       |           |          |             |                                         | 0.0063  | -0.5737 | 0.0132  | 0.0056  | 0.0050  |
|       |           |          |             |                                         | -0.0190 | 0.0051  | -0.0092 | -0.0039 |         |
|       | ( 61.62%) | -0.7850* | H 84        | s( 99.96%)p 0.00( 0.04%)                |         |         |         |         |         |
|       |           |          |             |                                         | -0.9998 | -0.0050 | -0.0007 | 0.0169  | -0.0024 |
|       |           |          |             |                                         | 0.0125  |         |         |         |         |
| 1514. | (0.00804) | BD*( 1)  | C 28 - H 90 |                                         |         |         |         |         |         |
|       | ( 39.23%) | 0.6264*  | C 28        | s( 23.20%)p 3.31( 76.76%)d 0.00( 0.04%) |         |         |         |         |         |
|       |           |          |             |                                         | -0.0002 | 0.4816  | 0.0056  | 0.0024  | 0.0001  |
|       |           |          |             |                                         | 0.3911  | -0.0046 | -0.0039 | -0.7480 | 0.0050  |
|       |           |          |             |                                         | -0.0078 | -0.2347 | 0.0020  | 0.0009  | -0.0144 |
|       |           |          |             |                                         | -0.0042 | 0.0079  | -0.0098 | -0.0076 |         |
|       | ( 60.77%) | -0.7795* | H 90        | s( 99.96%)p 0.00( 0.04%)                |         |         |         |         |         |
|       |           |          |             |                                         | 0.9998  | 0.0016  | 0.0002  | -0.0112 | 0.0159  |
|       |           |          |             |                                         | 0.0062  |         |         |         |         |
| 1515. | (0.00798) | BD*( 1)  | C 28 - H 91 |                                         |         |         |         |         |         |
|       | ( 39.54%) | 0.6288*  | C 28        | s( 23.87%)p 3.19( 76.08%)d 0.00( 0.05%) |         |         |         |         |         |
|       |           |          |             |                                         | 0.0000  | 0.4885  | 0.0040  | 0.0014  | -0.0001 |
|       |           |          |             |                                         | -0.3302 | 0.0010  | -0.0058 | -0.1091 | -0.0013 |
|       |           |          |             |                                         | -0.0084 | 0.7999  | -0.0030 | -0.0005 | -0.0004 |
|       |           |          |             |                                         | -0.0132 | -0.0049 | 0.0032  | 0.0169  |         |
|       | ( 60.46%) | -0.7776* | H 91        | s( 99.96%)p 0.00( 0.04%)                |         |         |         |         |         |
|       |           |          |             |                                         | 0.9998  | 0.0016  | 0.0000  | 0.0060  | 0.0017  |
|       |           |          |             |                                         | -0.0197 |         |         |         |         |
| 1516. | (0.01047) | BD*( 1)  | C 28 - H 92 |                                         |         |         |         |         |         |
|       | ( 39.32%) | 0.6270*  | C 28        | s( 23.66%)p 3.23( 76.30%)d 0.00( 0.05%) |         |         |         |         |         |
|       |           |          |             |                                         | 0.0000  | 0.4863  | 0.0077  | -0.0005 | 0.0000  |
|       |           |          |             |                                         | -0.6627 | -0.0002 | -0.0075 | 0.1397  | -0.0033 |
|       |           |          |             |                                         | -0.0065 | -0.5516 | 0.0033  | -0.0004 | -0.0055 |
|       |           |          |             |                                         | 0.0170  | -0.0029 | 0.0109  | 0.0023  |         |
|       | ( 60.68%) | -0.7790* | H 92        | s( 99.95%)p 0.00( 0.05%)                |         |         |         |         |         |
|       |           |          |             |                                         | 0.9998  | 0.0023  | 0.0002  | 0.0155  | -0.0051 |
|       |           |          |             |                                         | 0.0144  |         |         |         |         |
| 1517. | (0.01761) | BD*( 1)  | C 29 - C 30 |                                         |         |         |         |         |         |
|       | ( 49.31%) | 0.7022*  | C 29        | s( 26.01%)p 2.84( 73.95%)d 0.00( 0.04%) |         |         |         |         |         |
|       |           |          |             |                                         | 0.0001  | -0.5098 | 0.0125  | -0.0007 | 0.0000  |
|       |           |          |             |                                         | 0.8057  | 0.0033  | 0.0026  | -0.0250 | 0.0086  |
|       |           |          |             |                                         | -0.0004 | -0.2992 | -0.0115 | -0.0030 | 0.0012  |
|       |           |          |             |                                         | 0.0098  | -0.0003 | -0.0155 | 0.0063  |         |
|       | ( 50.69%) | -0.7120* | C 30        | s( 29.30%)p 2.41( 70.65%)d 0.00( 0.05%) |         |         |         |         |         |
|       |           |          |             |                                         | -0.0003 | -0.5410 | 0.0190  | 0.0027  | -0.0001 |
|       |           |          |             |                                         | -0.7841 | -0.0125 | 0.0134  | 0.0260  | 0.0014  |
|       |           |          |             |                                         | 0.0007  | 0.3011  | 0.0002  | -0.0070 | 0.0006  |
|       |           |          |             |                                         | 0.0124  | -0.0001 | -0.0161 | 0.0065  |         |
| 1518. | (0.01761) | BD*( 1)  | C 29 - C 61 |                                         |         |         |         |         |         |
|       | ( 48.72%) | 0.6980*  | C 29        | s( 26.46%)p 2.78( 73.50%)d 0.00( 0.04%) |         |         |         |         |         |
|       |           |          |             |                                         | 0.0001  | -0.5143 | 0.0111  | -0.0012 | -0.0001 |
|       |           |          |             |                                         | -0.3898 | -0.0116 | -0.0009 | -0.7555 | 0.0018  |
|       |           |          |             |                                         | -0.0055 | -0.1098 | -0.0075 | -0.0042 | -0.0130 |
|       |           |          |             |                                         | -0.0013 | -0.0030 | 0.0098  | 0.0089  |         |
|       | ( 51.28%) | -0.7161* | C 61        | s( 28.85%)p 2.46( 71.10%)d 0.00( 0.05%) |         |         |         |         |         |
|       |           |          |             |                                         | -0.0003 | -0.5370 | 0.0135  | -0.0007 | 0.0005  |
|       |           |          |             |                                         | 0.3908  | 0.0054  | -0.0080 | 0.7377  | 0.0078  |



-0.0073 0.1179 -0.0041 -0.0017 -0.0154  
 -0.0026 -0.0043 0.0098 0.0100  
 1519. (0.02465) BD\*( 1) C 29 - H 83  
 ( 38.95%) 0.6241\* C 29 s( 20.90%)p 3.78( 79.05%)d 0.00( 0.05%)  
 0.0002 -0.4567 -0.0201 0.0004 -0.0001  
 -0.4447 0.0057 0.0051 0.6083 -0.0122  
 -0.0052 -0.4717 0.0062 -0.0050 0.0137  
 -0.0105 0.0147 0.0046 0.0018  
 ( 61.05%) -0.7813\* H 83 s( 99.96%)p 0.00( 0.04%)  
 -0.9998 -0.0054 -0.0001 0.0113 -0.0145  
 0.0104  
 1520. (0.00762) BD\*( 1) C 30 - H 93  
 ( 39.26%) 0.6265\* C 30 s( 23.29%)p 3.29( 76.67%)d 0.00( 0.04%)  
 0.0001 -0.4826 -0.0052 -0.0019 -0.0002  
 -0.0011 0.0026 0.0077 -0.2021 0.0017  
 0.0005 -0.8519 0.0056 -0.0047 0.0000  
 -0.0001 -0.0081 0.0019 -0.0193  
 ( 60.74%) -0.7794\* H 93 s( 99.96%)p 0.00( 0.04%)  
 -0.9998 -0.0015 -0.0002 0.0020 0.0050  
 0.0203  
 1521. (0.01056) BD\*( 1) C 30 - H 94  
 ( 39.34%) 0.6272\* C 30 s( 23.75%)p 3.21( 76.20%)d 0.00( 0.05%)  
 0.0000 -0.4873 -0.0067 0.0002 0.0001  
 0.4764 0.0046 0.0087 -0.6003 0.0031  
 -0.0010 0.4178 -0.0031 -0.0025 0.0138  
 -0.0106 0.0112 0.0039 0.0031  
 ( 60.66%) -0.7789\* H 94 s( 99.95%)p 0.00( 0.05%)  
 -0.9998 -0.0022 -0.0002 -0.0107 0.0148  
 -0.0113  
 1522. (0.00687) BD\*( 1) C 30 - H 95  
 ( 39.27%) 0.6267\* C 30 s( 23.66%)p 3.22( 76.29%)d 0.00( 0.05%)  
 0.0001 -0.4864 -0.0049 -0.0014 0.0001  
 0.3962 0.0009 0.0082 0.7729 -0.0056  
 0.0006 0.0916 -0.0009 -0.0042 -0.0150  
 -0.0031 -0.0031 0.0112 0.0091  
 ( 60.73%) -0.7793\* H 95 s( 99.96%)p 0.00( 0.04%)  
 -0.9998 -0.0012 -0.0001 -0.0092 -0.0184  
 -0.0025  
 1523. (0.03513) BD\*( 1) C 31 - C 32  
 ( 49.39%) 0.7028\* C 31 s( 36.78%)p 1.72( 63.17%)d 0.00( 0.05%)  
 0.0002 -0.6065 0.0017 0.0032 -0.0001  
 -0.0389 -0.0034 -0.0005 -0.4016 0.0020  
 0.0015 -0.6847 -0.0088 -0.0028 0.0012  
 -0.0011 -0.0166 0.0036 -0.0135  
 ( 50.61%) -0.7114\* C 32 s( 33.82%)p 1.96( 66.13%)d 0.00( 0.05%)  
 0.0000 -0.5815 -0.0025 0.0007 0.0000  
 0.0788 -0.0101 0.0023 0.3802 0.0088  
 -0.0001 0.7143 -0.0021 -0.0014 0.0004  
 -0.0025 -0.0176 0.0042 -0.0140  
 1524. (0.03523) BD\*( 1) C 31 - C 36  
 ( 49.27%) 0.7020\* C 31 s( 36.98%)p 1.70( 62.97%)d 0.00( 0.05%)  
 0.0002 -0.6081 0.0016 0.0025 -0.0001  
 -0.5173 -0.0061 0.0000 0.5489 0.0054  
 0.0031 0.2464 -0.0054 -0.0025 0.0169  
 0.0061 -0.0095 0.0022 0.0070  
 ( 50.73%) -0.7122\* C 36 s( 33.78%)p 1.96( 66.16%)d 0.00( 0.05%)  
 0.0000 -0.5812 -0.0025 0.0001 0.0000  
 0.5450 -0.0036 0.0022 -0.5690 -0.0023  
 0.0011 -0.2015 -0.0133 0.0006 0.0186  
 0.0066 -0.0093 0.0008 0.0077  
 1525. (0.37263) BD\*( 2) C 31 - C 36  
 ( 45.69%) 0.6759\* C 31 s( 0.01%)p99.99( 99.97%)d 1.31( 0.02%)  
 -0.0002 -0.0082 -0.0087 0.0009 0.0001  
 -0.5306 0.0061 0.0063 -0.7140 0.0026  
 0.0042 0.4562 -0.0007 -0.0033 -0.0013  
 0.0047 -0.0046 -0.0119 -0.0012  
 ( 54.31%) -0.7370\* C 36 s( 0.00%)p 1.00( 99.95%)d 0.00( 0.05%)  
 0.0000 -0.0004 -0.0057 0.0010 0.0001  
 -0.5517 0.0041 -0.0008 -0.6923 0.0101  
 0.0043 0.4644 -0.0046 -0.0005 -0.0017  
 -0.0118 -0.0024 0.0155 0.0107

1526. (0.02267) BD\*( 1) C 32 - C 33  
( 49.44%) 0.7032\* C 32 s( 34.05%)p 1.94( 65.90%)d 0.00( 0.05%)  
0.0001 -0.5834 -0.0094 -0.0040 -0.0001  
-0.6245 -0.0001 -0.0038 0.1621 0.0065  
-0.0023 -0.4925 0.0078 -0.0093 0.0081  
-0.0169 0.0031 -0.0103 -0.0005  
( 50.56%) -0.7110\* C 33 s( 35.75%)p 1.80( 64.19%)d 0.00( 0.06%)  
-0.0001 -0.5979 0.0011 0.0044 0.0001  
0.6298 0.0154 -0.0076 -0.1843 -0.0134  
0.0007 0.4591 -0.0018 -0.0081 0.0085  
-0.0198 0.0030 -0.0117 -0.0013

1527. (0.34032) BD\*( 2) C 32 - C 33  
( 51.62%) 0.7184\* C 32 s( 0.01%)p 1.00( 99.96%)d 0.00( 0.03%)  
0.0001 0.0002 0.0071 -0.0021 -0.0001  
0.5350 -0.0046 -0.0012 0.7197 -0.0022  
0.0042 -0.4419 0.0039 0.0014 0.0053  
-0.0052 0.0062 0.0150 -0.0017  
( 48.38%) -0.6956\* C 33 s( 0.00%)p 1.00( 99.97%)d 0.00( 0.03%)  
0.0001 0.0016 0.0012 -0.0001 -0.0001  
0.5376 -0.0028 0.0092 0.7132 -0.0032  
0.0113 -0.4491 0.0015 -0.0089 -0.0083  
-0.0035 -0.0097 -0.0037 0.0113

1528. (0.03229) BD\*( 1) C 32 - C 37  
( 49.77%) 0.7055\* C 32 s( 32.10%)p 2.11( 67.87%)d 0.00( 0.03%)  
0.0001 -0.5665 0.0064 0.0038 0.0000  
0.5628 0.0103 -0.0042 -0.5572 -0.0122  
0.0048 -0.2264 -0.0063 0.0002 0.0144  
0.0047 -0.0061 -0.0010 0.0064  
( 50.23%) -0.7087\* C 37 s( 26.54%)p 2.77( 73.40%)d 0.00( 0.06%)  
-0.0001 -0.5152 -0.0012 0.0021 0.0001  
-0.5819 0.0019 0.0024 0.5808 -0.0006  
-0.0011 0.2409 0.0016 -0.0035 0.0189  
0.0080 -0.0079 0.0002 0.0090

1529. (0.01475) BD\*( 1) C 33 - C 34  
( 49.78%) 0.7056\* C 33 s( 36.06%)p 1.77( 63.89%)d 0.00( 0.05%)  
0.0000 -0.6003 -0.0142 -0.0045 0.0000  
-0.5534 -0.0226 -0.0069 0.5416 0.0063  
-0.0020 0.1955 -0.0178 -0.0118 0.0170  
0.0080 -0.0113 0.0022 0.0056  
( 50.22%) -0.7086\* C 34 s( 35.89%)p 1.78( 64.04%)d 0.00( 0.07%)  
0.0000 -0.5990 -0.0074 0.0018 0.0001  
0.5213 -0.0002 -0.0098 -0.5587 -0.0181  
0.0052 -0.2351 -0.0270 -0.0075 0.0221  
0.0044 -0.0059 -0.0021 0.0108

1530. (0.01721) BD\*( 1) C 33 - H 70  
( 39.08%) 0.6251\* C 33 s( 28.16%)p 2.55( 71.80%)d 0.00( 0.04%)  
0.0004 -0.5306 0.0109 0.0005 -0.0001  
-0.0816 -0.0035 -0.0002 -0.4036 0.0098  
0.0078 -0.7403 0.0129 0.0104 -0.0010  
-0.0026 -0.0140 0.0038 -0.0120  
( 60.92%) -0.7805\* H 70 s( 99.95%)p 0.00( 0.05%)  
-0.9997 -0.0019 -0.0013 0.0021 0.0114  
0.0202

1531. (0.01478) BD\*( 1) C 34 - C 35  
( 50.12%) 0.7080\* C 34 s( 36.02%)p 1.77( 63.92%)d 0.00( 0.06%)  
0.0000 0.6001 0.0067 -0.0022 -0.0002  
-0.0528 0.0196 0.0070 -0.4018 -0.0227  
-0.0036 -0.6883 -0.0117 0.0110 0.0021  
0.0078 0.0170 -0.0027 0.0169  
( 49.88%) -0.7062\* C 35 s( 35.99%)p 1.78( 63.96%)d 0.00( 0.05%)  
0.0000 0.5997 0.0141 0.0044 0.0001  
0.0989 0.0230 0.0088 0.3787 -0.0068  
-0.0087 0.6967 0.0182 0.0056 -0.0012  
-0.0001 0.0182 -0.0056 0.0119

1532. (0.33303) BD\*( 2) C 34 - C 35  
( 50.89%) 0.7134\* C 34 s( 0.00%)p 1.00( 99.97%)d 0.00( 0.03%)  
0.0000 -0.0020 0.0008 -0.0041 -0.0002  
0.5464 -0.0043 0.0015 0.7032 -0.0061  
0.0062 -0.4543 0.0042 -0.0038 -0.0066  
-0.0054 -0.0090 -0.0019 0.0108  
( 49.11%) -0.7008\* C 35 s( 0.00%)p 1.00( 99.97%)d 0.00( 0.02%)

|       |           |                     |                                         |  |         |         |         |         |         |
|-------|-----------|---------------------|-----------------------------------------|--|---------|---------|---------|---------|---------|
|       |           |                     |                                         |  | 0.0000  | -0.0028 | -0.0012 | -0.0004 | -0.0007 |
|       |           |                     |                                         |  | 0.5503  | -0.0039 | 0.0071  | 0.6993  | -0.0056 |
|       |           |                     |                                         |  | 0.0123  | -0.4556 | 0.0037  | -0.0088 | 0.0026  |
|       |           |                     |                                         |  | 0.0080  | 0.0007  | -0.0107 | -0.0078 |         |
| 1533. | (0.01550) | BD*( 1) C 34 - H 69 |                                         |  |         |         |         |         |         |
|       | ( 38.99%) | 0.6244* C 34        | s( 28.04%)p 2.56( 71.92%)d 0.00( 0.03%) |  |         |         |         |         |         |
|       |           |                     |                                         |  | 0.0004  | -0.5294 | 0.0119  | -0.0035 | -0.0003 |
|       |           |                     |                                         |  | -0.6523 | 0.0173  | -0.0025 | 0.1740  | -0.0054 |
|       |           |                     |                                         |  | 0.0021  | -0.5127 | 0.0149  | -0.0043 | 0.0013  |
|       |           |                     |                                         |  | -0.0134 | 0.0081  | -0.0086 | 0.0004  |         |
|       | ( 61.01%) | -0.7811* H 69       | s( 99.95%)p 0.00( 0.05%)                |  |         |         |         |         |         |
|       |           |                     |                                         |  | -0.9997 | -0.0014 | -0.0005 | 0.0178  | -0.0047 |
|       |           |                     |                                         |  | 0.0142  |         |         |         |         |
| 1534. | (0.02305) | BD*( 1) C 35 - C 36 |                                         |  |         |         |         |         |         |
|       | ( 50.57%) | 0.7111* C 35        | s( 35.77%)p 1.79( 64.16%)d 0.00( 0.06%) |  |         |         |         |         |         |
|       |           |                     |                                         |  | 0.0001  | 0.5981  | -0.0014 | -0.0046 | -0.0001 |
|       |           |                     |                                         |  | -0.6018 | -0.0037 | 0.0070  | 0.1453  | -0.0067 |
|       |           |                     |                                         |  | -0.0042 | -0.5078 | -0.0186 | 0.0049  | -0.0082 |
|       |           |                     |                                         |  | 0.0202  | -0.0033 | 0.0114  | 0.0020  |         |
|       | ( 49.43%) | -0.7031* C 36       | s( 34.00%)p 1.94( 65.95%)d 0.00( 0.05%) |  |         |         |         |         |         |
|       |           |                     |                                         |  | -0.0001 | 0.5830  | 0.0097  | 0.0032  | 0.0001  |
|       |           |                     |                                         |  | 0.6250  | -0.0061 | 0.0075  | -0.1702 | 0.0068  |
|       |           |                     |                                         |  | -0.0074 | 0.4895  | 0.0045  | 0.0014  | -0.0066 |
|       |           |                     |                                         |  | 0.0177  | -0.0026 | 0.0094  | 0.0028  |         |
| 1535. | (0.01717) | BD*( 1) C 35 - H 68 |                                         |  |         |         |         |         |         |
|       | ( 38.96%) | 0.6242* C 35        | s( 28.21%)p 2.54( 71.76%)d 0.00( 0.04%) |  |         |         |         |         |         |
|       |           |                     |                                         |  | 0.0004  | -0.5310 | 0.0105  | 0.0002  | -0.0001 |
|       |           |                     |                                         |  | -0.5693 | 0.0071  | 0.0068  | 0.5878  | -0.0130 |
|       |           |                     |                                         |  | -0.0069 | 0.2180  | -0.0083 | -0.0055 | 0.0152  |
|       |           |                     |                                         |  | 0.0057  | -0.0065 | 0.0008  | 0.0073  |         |
|       | ( 61.04%) | -0.7813* H 68       | s( 99.95%)p 0.00( 0.05%)                |  |         |         |         |         |         |
|       |           |                     |                                         |  | -0.9997 | 0.0019  | -0.0015 | 0.0154  | -0.0159 |
|       |           |                     |                                         |  | -0.0066 |         |         |         |         |
| 1536. | (0.03217) | BD*( 1) C 36 - C 39 |                                         |  |         |         |         |         |         |
|       | ( 49.62%) | 0.7044* C 36        | s( 32.18%)p 2.11( 67.79%)d 0.00( 0.03%) |  |         |         |         |         |         |
|       |           |                     |                                         |  | 0.0001  | -0.5672 | 0.0067  | 0.0038  | 0.0001  |
|       |           |                     |                                         |  | 0.0846  | 0.0002  | -0.0016 | 0.4088  | 0.0113  |
|       |           |                     |                                         |  | -0.0023 | 0.7094  | 0.0143  | -0.0049 | -0.0009 |
|       |           |                     |                                         |  | -0.0040 | -0.0133 | 0.0031  | -0.0101 |         |
|       | ( 50.38%) | -0.7098* C 39       | s( 26.43%)p 2.78( 73.51%)d 0.00( 0.06%) |  |         |         |         |         |         |
|       |           |                     |                                         |  | -0.0001 | -0.5141 | -0.0010 | 0.0021  | 0.0002  |
|       |           |                     |                                         |  | -0.0840 | 0.0010  | -0.0001 | -0.4367 | -0.0029 |
|       |           |                     |                                         |  | 0.0041  | -0.7330 | 0.0018  | 0.0024  | -0.0019 |
|       |           |                     |                                         |  | -0.0031 | -0.0177 | 0.0054  | -0.0146 |         |
| 1537. | (0.01669) | BD*( 1) C 37 - C 38 |                                         |  |         |         |         |         |         |
|       | ( 49.23%) | 0.7017* C 37        | s( 26.24%)p 2.81( 73.73%)d 0.00( 0.04%) |  |         |         |         |         |         |
|       |           |                     |                                         |  | 0.0001  | -0.5120 | 0.0130  | -0.0007 | 0.0000  |
|       |           |                     |                                         |  | 0.2983  | 0.0144  | 0.0026  | 0.1711  | 0.0027  |
|       |           |                     |                                         |  | -0.0009 | -0.7866 | 0.0000  | -0.0023 | -0.0018 |
|       |           |                     |                                         |  | 0.0100  | 0.0067  | -0.0012 | -0.0151 |         |
|       | ( 50.77%) | -0.7125* C 38       | s( 29.30%)p 2.41( 70.66%)d 0.00( 0.05%) |  |         |         |         |         |         |
|       |           |                     |                                         |  | -0.0003 | -0.5409 | 0.0191  | 0.0022  | -0.0001 |
|       |           |                     |                                         |  | -0.3080 | -0.0004 | 0.0074  | -0.1553 | -0.0041 |
|       |           |                     |                                         |  | 0.0026  | 0.7663  | 0.0125  | -0.0130 | -0.0027 |
|       |           |                     |                                         |  | 0.0126  | 0.0067  | -0.0021 | -0.0157 |         |
| 1538. | (0.01793) | BD*( 1) C 37 - C 55 |                                         |  |         |         |         |         |         |
|       | ( 48.57%) | 0.6969* C 37        | s( 26.40%)p 2.79( 73.56%)d 0.00( 0.03%) |  |         |         |         |         |         |
|       |           |                     |                                         |  | 0.0001  | -0.5137 | 0.0103  | -0.0015 | -0.0001 |
|       |           |                     |                                         |  | -0.3214 | 0.0052  | 0.0016  | -0.7940 | -0.0075 |
|       |           |                     |                                         |  | -0.0068 | 0.0400  | 0.0084  | -0.0028 | -0.0118 |
|       |           |                     |                                         |  | 0.0009  | 0.0010  | 0.0108  | 0.0095  |         |
|       | ( 51.43%) | -0.7172* C 55       | s( 28.68%)p 2.48( 71.27%)d 0.00( 0.05%) |  |         |         |         |         |         |
|       |           |                     |                                         |  | -0.0004 | -0.5354 | 0.0131  | -0.0008 | 0.0005  |
|       |           |                     |                                         |  | 0.3100  | 0.0081  | -0.0025 | 0.7838  | 0.0066  |
|       |           |                     |                                         |  | -0.0090 | -0.0450 | -0.0031 | 0.0042  | -0.0125 |
|       |           |                     |                                         |  | 0.0009  | 0.0026  | 0.0133  | 0.0107  |         |
| 1539. | (0.02520) | BD*( 1) C 37 - H 85 |                                         |  |         |         |         |         |         |
|       | ( 38.85%) | 0.6233* C 37        | s( 20.87%)p 3.79( 79.08%)d 0.00( 0.05%) |  |         |         |         |         |         |
|       |           |                     |                                         |  | -0.0002 | 0.4564  | 0.0202  | -0.0004 | 0.0001  |
|       |           |                     |                                         |  | -0.6842 | 0.0102  | -0.0026 | -0.0463 | 0.0035  |
|       |           |                     |                                         |  | 0.0031  | -0.5659 | 0.0096  | 0.0078  | 0.0018  |

|       |           |          |              |                                         |         |         |         |         |         |
|-------|-----------|----------|--------------|-----------------------------------------|---------|---------|---------|---------|---------|
|       |           |          |              |                                         | 0.0195  | 0.0016  | 0.0118  | 0.0025  |         |
|       | ( 61.15%) | -0.7820* | H 85         | s( 99.95%)p 0.00( 0.05%)                | 0.9998  | 0.0055  | 0.0003  | 0.0160  | 0.0013  |
|       |           |          |              |                                         | 0.0141  |         |         |         |         |
| 1540. | (0.00720) | BD*( 1)  | C 38 - H 105 |                                         |         |         |         |         |         |
|       | ( 39.14%) | 0.6256*  | C 38         | s( 23.26%)p 3.30( 76.70%)d 0.00( 0.04%) | 0.0001  | -0.4823 | -0.0050 | -0.0014 | -0.0002 |
|       |           |          |              |                                         | 0.6347  | -0.0039 | 0.0046  | -0.5690 | 0.0053  |
|       |           |          |              |                                         | 0.0016  | -0.2004 | -0.0007 | -0.0077 | 0.0169  |
|       |           |          |              |                                         | 0.0055  | -0.0062 | -0.0016 | 0.0093  |         |
|       | ( 60.86%) | -0.7801* | H 105        | s( 99.96%)p 0.00( 0.04%)                | -0.9998 | -0.0013 | -0.0002 | -0.0151 | 0.0144  |
|       |           |          |              |                                         | 0.0031  |         |         |         |         |
| 1541. | (0.00679) | BD*( 1)  | C 38 - H 106 |                                         |         |         |         |         |         |
|       | ( 39.17%) | 0.6258*  | C 38         | s( 23.69%)p 3.22( 76.26%)d 0.00( 0.04%) | 0.0001  | -0.4867 | -0.0057 | -0.0014 | 0.0001  |
|       |           |          |              |                                         | 0.3371  | -0.0018 | 0.0046  | 0.8043  | -0.0049 |
|       |           |          |              |                                         | 0.0022  | -0.0449 | -0.0034 | -0.0073 | -0.0122 |
|       |           |          |              |                                         | -0.0001 | 0.0020  | 0.0124  | 0.0117  |         |
|       | ( 60.83%) | -0.7800* | H 106        | s( 99.96%)p 0.00( 0.04%)                | -0.9998 | -0.0012 | -0.0001 | -0.0076 | -0.0195 |
|       |           |          |              |                                         | 0.0007  |         |         |         |         |
| 1542. | (0.01082) | BD*( 1)  | C 38 - H 107 |                                         |         |         |         |         |         |
|       | ( 39.43%) | 0.6280*  | C 38         | s( 23.75%)p 3.21( 76.20%)d 0.00( 0.05%) | 0.0000  | -0.4873 | -0.0061 | 0.0002  | 0.0001  |
|       |           |          |              |                                         | -0.6228 | 0.0046  | 0.0024  | -0.0677 | 0.0027  |
|       |           |          |              |                                         | 0.0014  | -0.6078 | -0.0039 | -0.0086 | -0.0015 |
|       |           |          |              |                                         | -0.0190 | -0.0026 | -0.0083 | -0.0042 |         |
|       | ( 60.57%) | -0.7782* | H 107        | s( 99.95%)p 0.00( 0.05%)                | -0.9998 | -0.0023 | -0.0002 | 0.0158  | 0.0015  |
|       |           |          |              |                                         | 0.0142  |         |         |         |         |
| 1543. | (0.01773) | BD*( 1)  | C 39 - C 40  |                                         |         |         |         |         |         |
|       | ( 49.31%) | 0.7022*  | C 39         | s( 25.93%)p 2.85( 74.03%)d 0.00( 0.04%) | 0.0001  | -0.5091 | 0.0127  | -0.0008 | 0.0000  |
|       |           |          |              |                                         | 0.1679  | 0.0122  | 0.0013  | 0.8291  | 0.0066  |
|       |           |          |              |                                         | 0.0029  | -0.1563 | 0.0056  | 0.0017  | -0.0059 |
|       |           |          |              |                                         | 0.0010  | 0.0074  | 0.0154  | 0.0076  |         |
|       | ( 50.69%) | -0.7120* | C 40         | s( 29.25%)p 2.42( 70.71%)d 0.00( 0.05%) | -0.0003 | -0.5405 | 0.0192  | 0.0027  | -0.0001 |
|       |           |          |              |                                         | -0.1631 | -0.0001 | 0.0048  | -0.8120 | -0.0118 |
|       |           |          |              |                                         | 0.0144  | 0.1443  | 0.0058  | -0.0009 | -0.0074 |
|       |           |          |              |                                         | 0.0012  | 0.0062  | 0.0163  | 0.0097  |         |
| 1544. | (0.01637) | BD*( 1)  | C 39 - C 56  |                                         |         |         |         |         |         |
|       | ( 48.43%) | 0.6959*  | C 39         | s( 26.76%)p 2.74( 73.21%)d 0.00( 0.03%) | 0.0001  | -0.5172 | 0.0107  | -0.0016 | -0.0001 |
|       |           |          |              |                                         | -0.6945 | 0.0043  | -0.0029 | -0.0842 | -0.0075 |
|       |           |          |              |                                         | 0.0041  | 0.4924  | 0.0115  | 0.0055  | -0.0029 |
|       |           |          |              |                                         | 0.0144  | 0.0013  | -0.0107 | 0.0012  |         |
|       | ( 51.57%) | -0.7181* | C 56         | s( 28.64%)p 2.49( 71.31%)d 0.00( 0.05%) | -0.0003 | -0.5350 | 0.0137  | 0.0009  | 0.0005  |
|       |           |          |              |                                         | 0.6749  | 0.0104  | -0.0077 | 0.0911  | 0.0043  |
|       |           |          |              |                                         | -0.0040 | -0.4991 | -0.0006 | 0.0072  | -0.0036 |
|       |           |          |              |                                         | 0.0176  | 0.0028  | -0.0117 | -0.0006 |         |
| 1545. | (0.02379) | BD*( 1)  | C 39 - H 86  |                                         |         |         |         |         |         |
|       | ( 38.67%) | 0.6218*  | C 39         | s( 20.93%)p 3.78( 79.02%)d 0.00( 0.05%) | -0.0002 | 0.4570  | 0.0204  | -0.0005 | 0.0001  |
|       |           |          |              |                                         | -0.6937 | 0.0148  | 0.0011  | 0.3371  | -0.0045 |
|       |           |          |              |                                         | -0.0086 | -0.4416 | 0.0045  | -0.0041 | -0.0119 |
|       |           |          |              |                                         | 0.0152  | -0.0071 | 0.0093  | -0.0035 |         |
|       | ( 61.33%) | -0.7831* | H 86         | s( 99.95%)p 0.00( 0.05%)                | 0.9998  | 0.0050  | 0.0003  | 0.0161  | -0.0093 |
|       |           |          |              |                                         | 0.0107  |         |         |         |         |
| 1546. | (0.00750) | BD*( 1)  | C 40 - H 99  |                                         |         |         |         |         |         |
|       | ( 39.13%) | 0.6255*  | C 40         | s( 23.33%)p 3.28( 76.62%)d 0.00( 0.04%) | 0.0002  | -0.4830 | -0.0052 | -0.0020 | -0.0001 |
|       |           |          |              |                                         | 0.1246  | -0.0003 | 0.0030  | 0.4299  | -0.0014 |
|       |           |          |              |                                         | 0.0085  | 0.7522  | -0.0064 | -0.0003 | -0.0022 |
|       |           |          |              |                                         | -0.0044 | -0.0157 | 0.0032  | -0.0126 |         |
|       | ( 60.87%) | -0.7802* | H 99         | s( 99.96%)p 0.00( 0.04%)                | -0.9998 | -0.0015 | -0.0002 | -0.0026 | -0.0085 |
|       |           |          |              |                                         | -0.0190 |         |         |         |         |

1547. (0.01046) BD\*( 1) C 40 - H 100  
( 39.41%) 0.6278\* C 40 s( 23.74%)p 3.21( 76.21%)d 0.00( 0.05%)  
0.0000 -0.4872 -0.0070 0.0002 0.0001  
-0.6620 0.0040 0.0009 0.3821 0.0043  
0.0090 -0.4216 -0.0002 -0.0023 0.0130  
-0.0130 0.0075 -0.0076 0.0021  
( 60.59%) -0.7784\* H 100 s( 99.95%)p 0.00( 0.05%)  
-0.9998 -0.0023 -0.0002 0.0169 -0.0084  
0.0106

1548. (0.00695) BD\*( 1) C 40 - H 101  
( 39.32%) 0.6271\* C 40 s( 23.68%)p 3.22( 76.28%)d 0.00( 0.05%)  
-0.0001 0.4866 0.0049 0.0013 -0.0001  
-0.7204 0.0044 -0.0028 -0.0929 -0.0021  
-0.0090 0.4848 -0.0023 0.0007 0.0031  
-0.0160 -0.0020 0.0134 0.0006  
( 60.68%) -0.7790\* H 101 s( 99.96%)p 0.00( 0.04%)  
0.9998 0.0013 0.0001 0.0172 0.0018  
-0.0115

1549. (0.02999) BD\*( 1) C 41 - C 42  
( 55.48%) 0.7449\* C 41 s( 37.96%)p 1.30( 49.31%)d 0.34( 12.73%)  
0.0000 -0.6133 -0.0553 -0.0197 -0.0027  
0.1738 -0.0779 0.0533 0.3260 0.0165  
-0.0382 0.5291 -0.2482 0.0670 -0.1555  
0.0408 -0.2973 -0.0180 -0.1130  
( 44.52%) -0.6672\* C 42 s( 33.58%)p 1.98( 66.37%)d 0.00( 0.05%)  
0.0000 -0.5794 -0.0030 0.0010 0.0000  
-0.1977 -0.0101 0.0001 -0.3551 0.0092  
-0.0019 -0.7059 -0.0035 0.0009 -0.0035  
-0.0108 -0.0139 0.0024 -0.0147

1550. (0.03084) BD\*( 1) C 41 - C 46  
( 56.24%) 0.7499\* C 41 s( 36.17%)p 1.39( 50.23%)d 0.38( 13.60%)  
-0.0003 0.5978 -0.0609 -0.0258 -0.0025  
0.4202 -0.0918 0.0612 -0.3387 0.0307  
-0.0408 0.3585 -0.2513 0.0670 -0.1684  
0.0685 -0.3050 -0.0176 -0.0983  
( 43.76%) -0.6615\* C 46 s( 34.19%)p 1.92( 65.76%)d 0.00( 0.05%)  
0.0000 0.5847 0.0020 -0.0002 0.0001  
-0.4969 0.0013 0.0017 0.3954 -0.0085  
0.0026 -0.5041 -0.0105 0.0009 -0.0112  
0.0162 -0.0106 0.0022 0.0038

1551. (0.37132) BD\*( 2) C 41 - C 46  
( 47.25%) 0.6874\* C 41 s( 0.04%)p99.99( 98.66%)d31.71( 1.30%)  
0.0001 0.0118 -0.0141 -0.0085 -0.0011  
-0.8228 -0.0283 0.0244 -0.3815 0.0045  
-0.0080 0.3956 -0.0759 0.0186 -0.0462  
0.0154 -0.0984 -0.0174 -0.0260  
( 52.75%) -0.7263\* C 46 s( 0.00%)p 1.00( 99.95%)d 0.00( 0.05%)  
0.0000 -0.0021 0.0037 -0.0023 0.0000  
-0.7900 0.0074 0.0041 -0.4143 0.0014  
0.0003 0.4514 -0.0046 0.0002 0.0022  
0.0093 0.0084 0.0097 -0.0141

1552. (0.02303) BD\*( 1) C 42 - C 43  
( 49.61%) 0.7043\* C 42 s( 34.02%)p 1.94( 65.93%)d 0.00( 0.05%)  
0.0001 -0.5832 -0.0088 -0.0050 -0.0002  
-0.2753 -0.0041 -0.0005 0.7415 -0.0016  
0.0070 0.1828 -0.0102 0.0089 0.0136  
0.0013 -0.0067 0.0129 0.0084  
( 50.39%) -0.7099\* C 43 s( 35.87%)p 1.79( 64.06%)d 0.00( 0.06%)  
-0.0001 -0.5989 0.0004 0.0039 0.0003  
0.3007 0.0136 -0.0026 -0.7243 -0.0129  
0.0092 -0.1581 0.0100 0.0053 0.0146  
0.0012 -0.0090 0.0152 0.0090

1553. (0.33091) BD\*( 2) C 42 - C 43  
( 52.17%) 0.7223\* C 42 s( 0.00%)p 1.00( 99.96%)d 0.00( 0.04%)  
-0.0002 0.0002 -0.0028 0.0010 0.0001  
0.8064 -0.0066 0.0027 0.4056 -0.0017  
-0.0021 -0.4299 0.0017 -0.0012 -0.0069  
-0.0004 0.0089 0.0148 -0.0045  
( 47.83%) -0.6916\* C 43 s( 0.00%)p 1.00( 99.97%)d 0.00( 0.03%)  
0.0000 0.0023 0.0003 -0.0005 0.0002  
0.7924 -0.0040 0.0130 0.4229 -0.0035

|       |           |                     |            |                 |                |         |         |         |         |
|-------|-----------|---------------------|------------|-----------------|----------------|---------|---------|---------|---------|
|       |           |                     |            |                 | 0.0087         | -0.4389 | 0.0043  | -0.0083 | 0.0107  |
|       |           |                     |            |                 | 0.0088         | -0.0018 | -0.0073 | -0.0083 |         |
| 1554. | (0.03204) | BD*( 1) C 42 - C 47 |            |                 |                |         |         |         |         |
|       | ( 49.40%) | 0.7028* C 42        | s( 32.37%) | p 2.09( 67.60%) | d 0.00( 0.03%) |         |         |         |         |
|       |           |                     |            |                 | 0.0001         | -0.5689 | 0.0064  | 0.0048  | 0.0002  |
|       |           |                     |            |                 | 0.4840         | 0.0068  | -0.0034 | -0.3985 | -0.0093 |
|       |           |                     |            |                 | 0.0061         | 0.5316  | 0.0132  | -0.0034 | 0.0092  |
|       |           |                     |            |                 | -0.0114        | 0.0093  | 0.0001  | -0.0027 |         |
|       | ( 50.60%) | -0.7114* C 47       | s( 26.33%) | p 2.80( 73.61%) | d 0.00( 0.06%) |         |         |         |         |
|       |           |                     |            |                 | -0.0002        | -0.5132 | 0.0005  | -0.0010 | -0.0007 |
|       |           |                     |            |                 | -0.4936        | 0.0042  | 0.0002  | 0.4257  | -0.0009 |
|       |           |                     |            |                 | 0.0034         | -0.5579 | -0.0015 | -0.0008 | 0.0116  |
|       |           |                     |            |                 | -0.0157        | 0.0134  | -0.0027 | -0.0026 |         |
| 1555. | (0.01506) | BD*( 1) C 43 - C 44 |            |                 |                |         |         |         |         |
|       | ( 49.93%) | 0.7066* C 43        | s( 35.86%) | p 1.79( 64.08%) | d 0.00( 0.05%) |         |         |         |         |
|       |           |                     |            |                 | 0.0000         | 0.5987  | 0.0137  | 0.0045  | 0.0002  |
|       |           |                     |            |                 | 0.4855         | 0.0113  | 0.0009  | -0.4007 | -0.0269 |
|       |           |                     |            |                 | -0.0107        | 0.4934  | -0.0064 | -0.0094 | -0.0091 |
|       |           |                     |            |                 | 0.0170         | -0.0093 | 0.0036  | 0.0064  |         |
|       | ( 50.07%) | -0.7076* C 44       | s( 35.97%) | p 1.78( 63.96%) | d 0.00( 0.07%) |         |         |         |         |
|       |           |                     |            |                 | 0.0000         | 0.5997  | 0.0065  | -0.0023 | -0.0001 |
|       |           |                     |            |                 | -0.4876        | -0.0109 | 0.0078  | 0.3579  | -0.0108 |
|       |           |                     |            |                 | -0.0123        | -0.5220 | -0.0287 | -0.0016 | -0.0159 |
|       |           |                     |            |                 | 0.0157         | -0.0125 | 0.0004  | -0.0005 |         |
| 1556. | (0.01779) | BD*( 1) C 43 - H 75 |            |                 |                |         |         |         |         |
|       | ( 38.93%) | 0.6239* C 43        | s( 28.23%) | p 2.54( 71.73%) | d 0.00( 0.04%) |         |         |         |         |
|       |           |                     |            |                 | -0.0004        | 0.5312  | -0.0110 | -0.0007 | 0.0001  |
|       |           |                     |            |                 | -0.2119        | 0.0050  | 0.0050  | -0.3668 | 0.0028  |
|       |           |                     |            |                 | 0.0041         | -0.7331 | 0.0148  | 0.0114  | 0.0034  |
|       |           |                     |            |                 | 0.0074         | 0.0121  | -0.0022 | 0.0121  |         |
|       | ( 61.07%) | -0.7815* H 75       | s( 99.94%) | p 0.00( 0.06%)  |                |         |         |         |         |
|       |           |                     |            |                 | 0.9997         | -0.0021 | 0.0014  | 0.0069  | 0.0098  |
|       |           |                     |            |                 | 0.0202         |         |         |         |         |
| 1557. | (0.01496) | BD*( 1) C 44 - C 45 |            |                 |                |         |         |         |         |
|       | ( 50.21%) | 0.7086* C 44        | s( 36.00%) | p 1.78( 63.94%) | d 0.00( 0.07%) |         |         |         |         |
|       |           |                     |            |                 | 0.0000         | 0.5999  | 0.0077  | -0.0018 | -0.0001 |
|       |           |                     |            |                 | 0.2211         | 0.0194  | 0.0052  | 0.3173  | -0.0121 |
|       |           |                     |            |                 | -0.0121        | 0.6989  | 0.0237  | -0.0060 | 0.0028  |
|       |           |                     |            |                 | 0.0082         | 0.0189  | -0.0057 | 0.0138  |         |
|       | ( 49.79%) | -0.7056* C 45       | s( 36.09%) | p 1.77( 63.86%) | d 0.00( 0.05%) |         |         |         |         |
|       |           |                     |            |                 | 0.0000         | 0.6005  | 0.0145  | 0.0043  | 0.0000  |
|       |           |                     |            |                 | -0.1901        | 0.0105  | 0.0087  | -0.3628 | -0.0269 |
|       |           |                     |            |                 | -0.0111        | -0.6854 | -0.0074 | 0.0027  | 0.0029  |
|       |           |                     |            |                 | 0.0122         | 0.0110  | -0.0004 | 0.0153  |         |
| 1558. | (0.33468) | BD*( 2) C 44 - C 45 |            |                 |                |         |         |         |         |
|       | ( 51.09%) | 0.7148* C 44        | s( 0.00%)  | p 1.00( 99.97%) | d 0.00( 0.03%) |         |         |         |         |
|       |           |                     |            |                 | 0.0000         | 0.0020  | 0.0000  | 0.0013  | 0.0002  |
|       |           |                     |            |                 | 0.7891         | -0.0075 | 0.0086  | 0.4240  | -0.0036 |
|       |           |                     |            |                 | 0.0035         | -0.4439 | 0.0042  | -0.0045 | 0.0088  |
|       |           |                     |            |                 | 0.0092         | -0.0004 | -0.0054 | -0.0083 |         |
|       | ( 48.91%) | -0.6994* C 45       | s( 0.00%)  | p 1.00( 99.98%) | d 0.00( 0.02%) |         |         |         |         |
|       |           |                     |            |                 | 0.0000         | 0.0006  | 0.0004  | 0.0008  | 0.0003  |
|       |           |                     |            |                 | 0.7888         | -0.0079 | 0.0174  | 0.4249  | -0.0044 |
|       |           |                     |            |                 | 0.0092         | -0.4432 | 0.0044  | -0.0094 | -0.0024 |
|       |           |                     |            |                 | -0.0065        | -0.0058 | -0.0069 | 0.0101  |         |
| 1559. | (0.01582) | BD*( 1) C 44 - H 74 |            |                 |                |         |         |         |         |
|       | ( 39.13%) | 0.6255* C 44        | s( 27.98%) | p 2.57( 71.99%) | d 0.00( 0.03%) |         |         |         |         |
|       |           |                     |            |                 | -0.0004        | 0.5288  | -0.0120 | 0.0037  | 0.0003  |
|       |           |                     |            |                 | 0.2992         | -0.0092 | 0.0021  | -0.7682 | 0.0213  |
|       |           |                     |            |                 | -0.0037        | -0.1992 | 0.0055  | -0.0010 | -0.0075 |
|       |           |                     |            |                 | -0.0069        | 0.0052  | -0.0098 | -0.0099 |         |
|       | ( 60.87%) | -0.7802* H 74       | s( 99.95%) | p 0.00( 0.05%)  |                |         |         |         |         |
|       |           |                     |            |                 | 0.9997         | 0.0015  | 0.0005  | -0.0081 | 0.0208  |
|       |           |                     |            |                 | 0.0056         |         |         |         |         |
| 1560. | (0.02319) | BD*( 1) C 45 - C 46 |            |                 |                |         |         |         |         |
|       | ( 50.48%) | 0.7105* C 45        | s( 35.81%) | p 1.79( 64.13%) | d 0.00( 0.06%) |         |         |         |         |
|       |           |                     |            |                 | 0.0001         | 0.5984  | -0.0015 | -0.0044 | -0.0001 |
|       |           |                     |            |                 | -0.2685        | 0.0021  | 0.0054  | 0.7226  | 0.0119  |
|       |           |                     |            |                 | -0.0097        | 0.2157  | 0.0166  | -0.0008 | -0.0144 |
|       |           |                     |            |                 | -0.0012        | 0.0096  | -0.0151 | -0.0088 |         |
|       | ( 49.52%) | -0.7037* C 46       | s( 33.92%) | p 1.95( 66.03%) | d 0.00( 0.05%) |         |         |         |         |

|       |           |                      |                                         |  |         |         |         |         |         |
|-------|-----------|----------------------|-----------------------------------------|--|---------|---------|---------|---------|---------|
|       |           |                      |                                         |  | -0.0001 | 0.5823  | 0.0105  | 0.0032  | 0.0001  |
|       |           |                      |                                         |  | 0.2821  | -0.0061 | 0.0072  | -0.7397 | 0.0039  |
|       |           |                      |                                         |  | -0.0067 | -0.1828 | -0.0064 | 0.0029  | -0.0123 |
|       |           |                      |                                         |  | -0.0015 | 0.0091  | -0.0133 | -0.0076 |         |
| 1561. | (0.01777) | BD*( 1) C 45 - H 73  |                                         |  |         |         |         |         |         |
|       | ( 39.23%) | 0.6264* C 45         | s( 28.08%)p 2.56( 71.89%)d 0.00( 0.04%) |  |         |         |         |         |         |
|       |           |                      |                                         |  | 0.0004  | -0.5298 | 0.0108  | 0.0003  | -0.0001 |
|       |           |                      |                                         |  | -0.5182 | 0.0097  | 0.0075  | 0.4053  | -0.0025 |
|       |           |                      |                                         |  | -0.0044 | -0.5345 | 0.0133  | 0.0097  | 0.0095  |
|       |           |                      |                                         |  | -0.0131 | 0.0096  | -0.0024 | -0.0022 |         |
|       | ( 60.77%) | -0.7795* H 73        | s( 99.95%)p 0.00( 0.05%)                |  |         |         |         |         |         |
|       |           |                      |                                         |  | -0.9997 | -0.0022 | -0.0013 | 0.0141  | -0.0109 |
|       |           |                      |                                         |  | 0.0148  |         |         |         |         |
| 1562. | (0.03202) | BD*( 1) C 46 - C 49  |                                         |  |         |         |         |         |         |
|       | ( 49.98%) | 0.7070* C 46         | s( 31.86%)p 2.14( 68.11%)d 0.00( 0.03%) |  |         |         |         |         |         |
|       |           |                      |                                         |  | 0.0001  | -0.5644 | 0.0068  | 0.0036  | 0.0001  |
|       |           |                      |                                         |  | -0.2210 | -0.0078 | 0.0009  | -0.3522 | -0.0054 |
|       |           |                      |                                         |  | 0.0021  | -0.7127 | -0.0147 | 0.0044  | -0.0028 |
|       |           |                      |                                         |  | -0.0079 | -0.0115 | 0.0023  | -0.0105 |         |
|       | ( 50.02%) | -0.7072* C 49        | s( 26.68%)p 2.75( 73.27%)d 0.00( 0.06%) |  |         |         |         |         |         |
|       |           |                      |                                         |  | -0.0001 | -0.5165 | -0.0013 | 0.0016  | 0.0001  |
|       |           |                      |                                         |  | 0.2369  | 0.0022  | -0.0021 | 0.3571  | -0.0024 |
|       |           |                      |                                         |  | -0.0001 | 0.7410  | -0.0012 | -0.0030 | -0.0047 |
|       |           |                      |                                         |  | -0.0095 | -0.0147 | 0.0019  | -0.0149 |         |
| 1563. | (0.01776) | BD*( 1) C 47 - C 48  |                                         |  |         |         |         |         |         |
|       | ( 49.41%) | 0.7029* C 47         | s( 25.46%)p 2.93( 74.50%)d 0.00( 0.04%) |  |         |         |         |         |         |
|       |           |                      |                                         |  | 0.0001  | -0.5044 | 0.0108  | -0.0010 | 0.0002  |
|       |           |                      |                                         |  | -0.4860 | 0.0006  | 0.0000  | -0.4814 | -0.0109 |
|       |           |                      |                                         |  | -0.0039 | 0.5263  | 0.0032  | 0.0033  | -0.0111 |
|       |           |                      |                                         |  | 0.0120  | 0.0111  | -0.0025 | -0.0007 |         |
|       | ( 50.59%) | -0.7113* C 48        | s( 29.04%)p 2.44( 70.91%)d 0.00( 0.04%) |  |         |         |         |         |         |
|       |           |                      |                                         |  | -0.0004 | -0.5385 | 0.0197  | 0.0031  | -0.0001 |
|       |           |                      |                                         |  | 0.4637  | 0.0097  | -0.0063 | 0.4668  | 0.0057  |
|       |           |                      |                                         |  | -0.0107 | -0.5252 | -0.0065 | 0.0089  | -0.0111 |
|       |           |                      |                                         |  | 0.0124  | 0.0129  | 0.0003  | -0.0017 |         |
| 1564. | (0.01407) | BD*( 1) C 47 - C 57  |                                         |  |         |         |         |         |         |
|       | ( 48.96%) | 0.6997* C 47         | s( 26.39%)p 2.79( 73.57%)d 0.00( 0.04%) |  |         |         |         |         |         |
|       |           |                      |                                         |  | 0.0001  | -0.5136 | 0.0115  | -0.0020 | 0.0004  |
|       |           |                      |                                         |  | 0.4881  | 0.0114  | 0.0033  | 0.5405  | -0.0046 |
|       |           |                      |                                         |  | 0.0014  | 0.4528  | -0.0053 | 0.0020  | -0.0124 |
|       |           |                      |                                         |  | -0.0097 | -0.0115 | 0.0027  | 0.0006  |         |
|       | ( 51.04%) | -0.7144* C 57        | s( 29.01%)p 2.45( 70.94%)d 0.00( 0.05%) |  |         |         |         |         |         |
|       |           |                      |                                         |  | -0.0002 | -0.5382 | 0.0202  | 0.0029  | 0.0000  |
|       |           |                      |                                         |  | -0.5103 | -0.0053 | 0.0120  | -0.4975 | -0.0106 |
|       |           |                      |                                         |  | 0.0068  | -0.4483 | -0.0050 | 0.0073  | -0.0139 |
|       |           |                      |                                         |  | -0.0123 | -0.0117 | -0.0007 | 0.0021  |         |
| 1565. | (0.02568) | BD*( 1) C 47 - H 80  |                                         |  |         |         |         |         |         |
|       | ( 36.65%) | 0.6054* C 47         | s( 21.87%)p 3.57( 78.08%)d 0.00( 0.05%) |  |         |         |         |         |         |
|       |           |                      |                                         |  | -0.0001 | 0.4673  | 0.0194  | -0.0039 | 0.0000  |
|       |           |                      |                                         |  | -0.5302 | 0.0013  | 0.0029  | 0.5421  | -0.0107 |
|       |           |                      |                                         |  | -0.0021 | 0.4533  | -0.0094 | -0.0071 | -0.0137 |
|       |           |                      |                                         |  | -0.0119 | 0.0123  | -0.0010 | -0.0018 |         |
|       | ( 63.35%) | -0.7959* H 80        | s( 99.95%)p 0.00( 0.05%)                |  |         |         |         |         |         |
|       |           |                      |                                         |  | 0.9997  | -0.0068 | 0.0009  | 0.0164  | -0.0118 |
|       |           |                      |                                         |  | -0.0100 |         |         |         |         |
| 1566. | (0.00771) | BD*( 1) C 48 - H 126 |                                         |  |         |         |         |         |         |
|       | ( 39.06%) | 0.6250* C 48         | s( 23.30%)p 3.29( 76.66%)d 0.00( 0.04%) |  |         |         |         |         |         |
|       |           |                      |                                         |  | -0.0001 | 0.4827  | 0.0059  | 0.0020  | 0.0001  |
|       |           |                      |                                         |  | -0.5128 | 0.0049  | 0.0032  | 0.4359  | -0.0020 |
|       |           |                      |                                         |  | 0.0064  | -0.5599 | 0.0050  | -0.0055 | -0.0111 |
|       |           |                      |                                         |  | 0.0139  | -0.0110 | 0.0012  | 0.0022  |         |
|       | ( 60.94%) | -0.7807* H 126       | s( 99.96%)p 0.00( 0.04%)                |  |         |         |         |         |         |
|       |           |                      |                                         |  | 0.9998  | 0.0016  | 0.0002  | 0.0143  | -0.0089 |
|       |           |                      |                                         |  | 0.0115  |         |         |         |         |
| 1567. | (0.00801) | BD*( 1) C 48 - H 127 |                                         |  |         |         |         |         |         |
|       | ( 39.33%) | 0.6272* C 48         | s( 24.01%)p 3.16( 75.94%)d 0.00( 0.05%) |  |         |         |         |         |         |
|       |           |                      |                                         |  | 0.0000  | -0.4899 | -0.0038 | -0.0015 | 0.0001  |
|       |           |                      |                                         |  | -0.4783 | 0.0029  | -0.0042 | -0.5823 | 0.0008  |
|       |           |                      |                                         |  | -0.0058 | -0.4376 | 0.0025  | 0.0072  | -0.0126 |
|       |           |                      |                                         |  | -0.0115 | -0.0138 | 0.0024  | 0.0038  |         |
|       | ( 60.67%) | -0.7789* H 127       | s( 99.96%)p 0.00( 0.04%)                |  |         |         |         |         |         |

-0.9998 -0.0016 0.0000 0.0094 0.0139  
 0.0122  
 1568. (0.01041) BD\*( 1) C 48 - H 128  
 ( 39.57%) 0.6290\* C 48 s( 23.65%)p 3.23( 76.31%)d 0.00( 0.05%)  
 0.0001 -0.4862 -0.0077 0.0000 0.0000  
 -0.5408 -0.0011 -0.0065 0.5023 -0.0043  
 -0.0042 0.4672 0.0000 0.0061 0.0135  
 0.0111 -0.0119 -0.0021 0.0015  
 ( 60.43%) -0.7774\* H 128 s( 99.95%)p 0.00( 0.05%)  
 -0.9998 -0.0023 -0.0002 0.0126 -0.0141  
 -0.0110  
 1569. (0.01781) BD\*( 1) C 49 - C 50  
 ( 49.31%) 0.7022\* C 49 s( 25.91%)p 2.86( 74.05%)d 0.00( 0.04%)  
 0.0001 -0.5089 0.0121 -0.0007 0.0000  
 -0.8477 -0.0045 -0.0039 -0.1466 -0.0136  
 -0.0017 -0.0129 -0.0021 -0.0017 -0.0045  
 0.0004 -0.0006 -0.0162 0.0095  
 ( 50.69%) -0.7120\* C 50 s( 29.25%)p 2.42( 70.71%)d 0.00( 0.05%)  
 -0.0003 -0.5405 0.0189 0.0035 -0.0001  
 0.8273 0.0121 -0.0145 0.1479 -0.0011  
 -0.0049 0.0197 -0.0025 -0.0008 -0.0068  
 -0.0005 -0.0002 -0.0170 0.0107  
 1570. (0.01742) BD\*( 1) C 49 - C 58  
 ( 48.94%) 0.6996\* C 49 s( 26.33%)p 2.80( 73.64%)d 0.00( 0.04%)  
 0.0001 -0.5130 0.0114 -0.0010 -0.0001  
 0.2341 0.0099 -0.0001 0.4865 -0.0074  
 0.0017 -0.6668 -0.0074 -0.0067 -0.0055  
 0.0063 0.0149 0.0048 -0.0069  
 ( 51.06%) -0.7146\* C 58 s( 29.00%)p 2.45( 70.96%)d 0.00( 0.05%)  
 -0.0003 -0.5383 0.0139 -0.0007 0.0004  
 -0.2375 -0.0047 0.0061 -0.4655 -0.0082  
 0.0040 0.6605 0.0035 -0.0083 -0.0059  
 0.0087 0.0158 0.0042 -0.0090  
 1571. (0.02452) BD\*( 1) C 49 - H 79  
 ( 38.53%) 0.6207\* C 49 s( 21.13%)p 3.73( 78.82%)d 0.00( 0.05%)  
 0.0002 -0.4592 -0.0199 0.0003 -0.0001  
 0.4117 -0.0059 -0.0063 -0.7829 0.0133  
 0.0022 -0.0741 -0.0010 -0.0059 0.0162  
 0.0014 -0.0028 0.0113 0.0113  
 ( 61.47%) -0.7840\* H 79 s( 99.95%)p 0.00( 0.05%)  
 -0.9998 -0.0054 -0.0001 -0.0108 0.0183  
 0.0007  
 1572. (0.00762) BD\*( 1) C 50 - H 129  
 ( 39.26%) 0.6266\* C 50 s( 23.28%)p 3.29( 76.68%)d 0.00( 0.04%)  
 0.0001 -0.4824 -0.0052 -0.0022 -0.0001  
 -0.2253 -0.0008 -0.0084 -0.4023 0.0020  
 -0.0031 -0.7444 0.0062 -0.0012 -0.0041  
 -0.0082 -0.0138 0.0034 -0.0125  
 ( 60.74%) -0.7793\* H 129 s( 99.96%)p 0.00( 0.04%)  
 -0.9998 -0.0015 -0.0002 0.0034 0.0096  
 0.0183  
 1573. (0.01064) BD\*( 1) C 50 - H 130  
 ( 39.42%) 0.6279\* C 50 s( 23.73%)p 3.21( 76.22%)d 0.00( 0.05%)  
 0.0000 -0.4871 -0.0069 -0.0001 0.0001  
 -0.4523 -0.0047 -0.0092 0.7450 -0.0039  
 -0.0006 0.0499 0.0012 0.0002 0.0169  
 0.0011 -0.0018 0.0089 0.0092  
 ( 60.58%) -0.7783\* H 130 s( 99.95%)p 0.00( 0.05%)  
 -0.9998 -0.0023 -0.0002 0.0099 -0.0191  
 -0.0016  
 1574. (0.00691) BD\*( 1) C 50 - H 131  
 ( 39.19%) 0.6260\* C 50 s( 23.75%)p 3.21( 76.21%)d 0.00( 0.05%)  
 0.0001 -0.4873 -0.0045 -0.0015 0.0001  
 -0.2428 -0.0013 -0.0091 -0.5105 0.0030  
 -0.0027 0.6651 -0.0042 -0.0005 -0.0055  
 0.0083 0.0156 0.0064 -0.0086  
 ( 60.81%) -0.7798\* H 131 s( 99.96%)p 0.00( 0.04%)  
 -0.9998 -0.0013 -0.0001 0.0050 0.0122  
 -0.0157  
 1575. (0.01736) BD\*( 1) C 51 - C 52  
 ( 49.30%) 0.7022\* C 51 s( 25.89%)p 2.86( 74.08%)d 0.00( 0.04%)



|       |           |          |              |            |                 |                |         |         |
|-------|-----------|----------|--------------|------------|-----------------|----------------|---------|---------|
|       |           |          |              | 0.0001     | -0.5087         | 0.0118         | -0.0006 | 0.0000  |
|       |           |          |              | -0.5288    | -0.0133         | -0.0036        | -0.6263 | -0.0001 |
|       |           |          |              | -0.0006    | -0.2621         | 0.0059         | -0.0016 | -0.0145 |
|       |           |          |              | -0.0063    | -0.0076         | 0.0037         | 0.0071  |         |
|       | ( 50.70%) | -0.7120* | C 52         | s( 29.26%) | p 2.42( 70.70%) | d 0.00( 0.04%) |         |         |
|       |           |          |              | -0.0003    | -0.5406         | 0.0187         | 0.0032  | -0.0001 |
|       |           |          |              | 0.5262     | 0.0040          | -0.0109        | 0.6035  | 0.0111  |
|       |           |          |              | -0.0100    | 0.2560          | 0.0041         | -0.0035 | -0.0166 |
|       |           |          |              | -0.0066    | -0.0077         | 0.0022         | 0.0079  |         |
| 1576. | (0.01808) | BD*( 1)  | C 51 - C 59  |            |                 |                |         |         |
|       | ( 48.98%) | 0.6999*  | C 51         | s( 26.38%) | p 2.79( 73.58%) | d 0.00( 0.04%) |         |         |
|       |           |          |              | 0.0001     | -0.5135         | 0.0118         | -0.0012 | 0.0000  |
|       |           |          |              | 0.2026     | -0.0029         | -0.0020        | 0.5190  | 0.0130  |
|       |           |          |              | 0.0038     | -0.6521         | 0.0027         | -0.0054 | -0.0049 |
|       |           |          |              | 0.0062     | 0.0148          | 0.0042         | -0.0073 |         |
|       | ( 51.02%) | -0.7143* | C 59         | s( 28.97%) | p 2.45( 70.99%) | d 0.00( 0.05%) |         |         |
|       |           |          |              | -0.0003    | -0.5379         | 0.0183         | 0.0028  | -0.0001 |
|       |           |          |              | -0.1861    | -0.0069         | 0.0027         | -0.5215 | -0.0055 |
|       |           |          |              | 0.0103     | 0.6348          | 0.0075         | -0.0083 | -0.0053 |
|       |           |          |              | 0.0064     | 0.0175          | 0.0064         | -0.0071 |         |
| 1577. | (0.02484) | BD*( 1)  | C 51 - H 81  |            |                 |                |         |         |
|       | ( 38.55%) | 0.6209*  | C 51         | s( 21.11%) | p 3.73( 78.83%) | d 0.00( 0.05%) |         |         |
|       |           |          |              | 0.0002     | -0.4591         | -0.0199        | 0.0002  | -0.0001 |
|       |           |          |              | -0.4307    | 0.0066          | -0.0046        | 0.4807  | -0.0063 |
|       |           |          |              | -0.0017    | 0.6095          | -0.0112        | -0.0073 | 0.0105  |
|       |           |          |              | 0.0134     | -0.0148         | 0.0009         | -0.0047 |         |
|       | ( 61.45%) | -0.7839* | H 81         | s( 99.95%) | p 0.00( 0.05%)  |                |         |         |
|       |           |          |              | -0.9998    | -0.0053         | -0.0003        | 0.0094  | -0.0114 |
|       |           |          |              | -0.0157    |                 |                |         |         |
| 1578. | (0.00758) | BD*( 1)  | C 52 - H 114 |            |                 |                |         |         |
|       | ( 39.27%) | 0.6266*  | C 52         | s( 23.27%) | p 3.30( 76.69%) | d 0.00( 0.04%) |         |         |
|       |           |          |              | 0.0001     | -0.4824         | -0.0049        | -0.0019 | -0.0002 |
|       |           |          |              | -0.7336    | 0.0036          | -0.0070        | 0.3472  | -0.0045 |
|       |           |          |              | -0.0056    | -0.3286         | 0.0026         | -0.0021 | 0.0125  |
|       |           |          |              | -0.0111    | 0.0057          | -0.0102        | 0.0053  |         |
|       | ( 60.73%) | -0.7793* | H 114        | s( 99.96%) | p 0.00( 0.04%)  |                |         |         |
|       |           |          |              | -0.9998    | -0.0015         | -0.0002        | 0.0170  | -0.0101 |
|       |           |          |              | 0.0074     |                 |                |         |         |
| 1579. | (0.00682) | BD*( 1)  | C 52 - H 115 |            |                 |                |         |         |
|       | ( 39.16%) | 0.6258*  | C 52         | s( 23.73%) | p 3.21( 76.23%) | d 0.00( 0.05%) |         |         |
|       |           |          |              | 0.0001     | -0.4871         | -0.0049        | -0.0015 | 0.0001  |
|       |           |          |              | -0.2238    | 0.0001          | -0.0067        | -0.5221 | 0.0009  |
|       |           |          |              | -0.0061    | 0.6629          | -0.0057        | -0.0021 | -0.0040 |
|       |           |          |              | 0.0078     | 0.0171          | 0.0052         | -0.0073 |         |
|       | ( 60.84%) | -0.7800* | H 115        | s( 99.96%) | p 0.00( 0.04%)  |                |         |         |
|       |           |          |              | -0.9998    | -0.0012         | -0.0001        | 0.0049  | 0.0122  |
|       |           |          |              | -0.0160    |                 |                |         |         |
| 1580. | (0.01069) | BD*( 1)  | C 52 - H 116 |            |                 |                |         |         |
|       | ( 39.42%) | 0.6279*  | C 52         | s( 23.74%) | p 3.21( 76.21%) | d 0.00( 0.05%) |         |         |
|       |           |          |              | 0.0000     | -0.4872         | -0.0066        | -0.0001 | 0.0001  |
|       |           |          |              | 0.3660     | -0.0049         | -0.0048        | -0.4916 | -0.0039 |
|       |           |          |              | -0.0069    | -0.6215         | 0.0014         | -0.0034 | 0.0098  |
|       |           |          |              | 0.0107     | -0.0141         | 0.0030         | -0.0062 |         |
|       | ( 60.58%) | -0.7783* | H 116        | s( 99.95%) | p 0.00( 0.05%)  |                |         |         |
|       |           |          |              | -0.9998    | -0.0023         | -0.0002        | -0.0102 | 0.0118  |
|       |           |          |              | 0.0149     |                 |                |         |         |
| 1581. | (0.01793) | BD*( 1)  | C 53 - C 54  |            |                 |                |         |         |
|       | ( 49.47%) | 0.7033*  | C 53         | s( 25.43%) | p 2.93( 74.53%) | d 0.00( 0.04%) |         |         |
|       |           |          |              | 0.0001     | -0.5041         | 0.0116         | -0.0012 | 0.0002  |
|       |           |          |              | -0.4120    | -0.0070         | -0.0017        | -0.6126 | 0.0008  |
|       |           |          |              | -0.0013    | 0.4473          | 0.0101         | 0.0040  | -0.0131 |
|       |           |          |              | 0.0073     | 0.0118          | 0.0058         | 0.0031  |         |
|       | ( 50.53%) | -0.7109* | C 54         | s( 29.16%) | p 2.43( 70.79%) | d 0.00( 0.04%) |         |         |
|       |           |          |              | -0.0004    | -0.5397         | 0.0197         | 0.0026  | -0.0001 |
|       |           |          |              | 0.3913     | 0.0065          | -0.0080        | 0.5986  | 0.0106  |
|       |           |          |              | -0.0085    | -0.4428         | -0.0038        | 0.0097  | -0.0122 |
|       |           |          |              | 0.0092     | 0.0136          | 0.0052         | 0.0016  |         |
| 1582. | (0.01440) | BD*( 1)  | C 53 - C 60  |            |                 |                |         |         |
|       | ( 48.77%) | 0.6984*  | C 53         | s( 26.68%) | p 2.75( 73.28%) | d 0.00( 0.04%) |         |         |
|       |           |          |              | 0.0001     | -0.5164         | 0.0111         | -0.0030 | 0.0003  |
|       |           |          |              | 0.8357     | -0.0002         | 0.0037         | -0.0020 | 0.0130  |

|       |           |          |              |                                         |         |         |         |         |         |
|-------|-----------|----------|--------------|-----------------------------------------|---------|---------|---------|---------|---------|
|       |           |          |              |                                         | 0.0010  | 0.1850  | 0.0039  | 0.0027  | 0.0012  |
|       |           |          |              |                                         | -0.0066 | 0.0012  | -0.0163 | 0.0085  |         |
|       | ( 51.23%) | -0.7158* | C 60         | s( 28.89%)p 2.46( 71.06%)d 0.00( 0.05%) | -0.0002 | -0.5372 | 0.0153  | 0.0008  | 0.0003  |
|       |           |          |              |                                         | -0.8143 | -0.0103 | 0.0109  | -0.0251 | 0.0000  |
|       |           |          |              |                                         | 0.0036  | -0.2162 | 0.0030  | 0.0031  | -0.0017 |
|       |           |          |              |                                         | -0.0094 | -0.0008 | -0.0178 | 0.0091  |         |
| 1583. | (0.02457) | BD*( 1)  | C 53 - H 82  |                                         |         |         |         |         |         |
|       | ( 37.16%) | 0.6096*  | C 53         | s( 21.59%)p 3.63( 78.36%)d 0.00( 0.05%) | -0.0002 | 0.4642  | 0.0196  | -0.0045 | -0.0001 |
|       |           |          |              |                                         | 0.3373  | -0.0117 | -0.0022 | -0.7826 | 0.0088  |
|       |           |          |              |                                         | 0.0066  | -0.2390 | 0.0015  | -0.0035 | -0.0136 |
|       |           |          |              |                                         | -0.0042 | 0.0084  | -0.0116 | -0.0090 |         |
|       | ( 62.84%) | -0.7927* | H 82         | s( 99.95%)p 0.00( 0.05%)                | 0.9997  | -0.0062 | 0.0008  | -0.0052 | 0.0204  |
|       |           |          |              |                                         | 0.0064  |         |         |         |         |
| 1584. | (0.00781) | BD*( 1)  | C 54 - H 117 |                                         |         |         |         |         |         |
|       | ( 39.09%) | 0.6252*  | C 54         | s( 23.30%)p 3.29( 76.66%)d 0.00( 0.04%) | -0.0002 | 0.4826  | 0.0057  | 0.0020  | 0.0001  |
|       |           |          |              |                                         | -0.1218 | 0.0024  | 0.0046  | -0.1206 | 0.0013  |
|       |           |          |              |                                         | 0.0045  | -0.8585 | 0.0068  | -0.0062 | -0.0001 |
|       |           |          |              |                                         | 0.0048  | 0.0054  | 0.0005  | 0.0198  |         |
|       | ( 60.91%) | -0.7804* | H 117        | s( 99.96%)p 0.00( 0.04%)                | 0.9998  | 0.0016  | 0.0002  | 0.0044  | 0.0051  |
|       |           |          |              |                                         | 0.0192  |         |         |         |         |
| 1585. | (0.01050) | BD*( 1)  | C 54 - H 118 |                                         |         |         |         |         |         |
|       | ( 39.53%) | 0.6287*  | C 54         | s( 23.65%)p 3.23( 76.30%)d 0.00( 0.05%) | 0.0000  | -0.4863 | -0.0077 | 0.0003  | 0.0000  |
|       |           |          |              |                                         | 0.3074  | -0.0038 | -0.0041 | -0.7912 | -0.0001 |
|       |           |          |              |                                         | -0.0079 | -0.2058 | 0.0023  | 0.0041  | 0.0116  |
|       |           |          |              |                                         | 0.0016  | -0.0086 | 0.0127  | 0.0087  |         |
|       | ( 60.47%) | -0.7777* | H 118        | s( 99.95%)p 0.00( 0.05%)                | -0.9998 | -0.0024 | -0.0002 | -0.0090 | 0.0189  |
|       |           |          |              |                                         | 0.0062  |         |         |         |         |
| 1586. | (0.00765) | BD*( 1)  | C 54 - H 119 |                                         |         |         |         |         |         |
|       | ( 39.46%) | 0.6282*  | C 54         | s( 23.89%)p 3.18( 76.06%)d 0.00( 0.05%) | 0.0000  | -0.4887 | -0.0041 | -0.0013 | 0.0001  |
|       |           |          |              |                                         | -0.8584 | 0.0030  | -0.0039 | 0.0069  | 0.0003  |
|       |           |          |              |                                         | -0.0068 | -0.1538 | 0.0025  | 0.0064  | 0.0010  |
|       |           |          |              |                                         | -0.0071 | -0.0021 | -0.0185 | 0.0098  |         |
|       | ( 60.54%) | -0.7781* | H 119        | s( 99.96%)p 0.00( 0.04%)                | -0.9998 | -0.0015 | 0.0000  | 0.0201  | -0.0025 |
|       |           |          |              |                                         | 0.0038  |         |         |         |         |
| 1587. | (0.00767) | BD*( 1)  | C 55 - H 108 |                                         |         |         |         |         |         |
|       | ( 39.32%) | 0.6271*  | C 55         | s( 23.12%)p 3.32( 76.84%)d 0.00( 0.04%) | 0.0002  | -0.4808 | -0.0082 | -0.0040 | -0.0002 |
|       |           |          |              |                                         | 0.6195  | -0.0084 | 0.0010  | -0.5849 | 0.0036  |
|       |           |          |              |                                         | -0.0137 | -0.2050 | 0.0088  | -0.0044 | 0.0172  |
|       |           |          |              |                                         | 0.0052  | -0.0061 | -0.0019 | 0.0080  |         |
|       | ( 60.68%) | -0.7790* | H 108        | s( 99.96%)p 0.00( 0.04%)                | -0.9998 | -0.0014 | -0.0004 | -0.0156 | 0.0129  |
|       |           |          |              |                                         | 0.0053  |         |         |         |         |
| 1588. | (0.01032) | BD*( 1)  | C 55 - H 109 |                                         |         |         |         |         |         |
|       | ( 39.46%) | 0.6281*  | C 55         | s( 23.70%)p 3.22( 76.26%)d 0.00( 0.04%) | 0.0000  | -0.4867 | -0.0104 | -0.0020 | 0.0001  |
|       |           |          |              |                                         | -0.6609 | -0.0017 | -0.0052 | -0.1029 | -0.0056 |
|       |           |          |              |                                         | -0.0091 | -0.5612 | 0.0090  | -0.0058 | -0.0022 |
|       |           |          |              |                                         | -0.0172 | -0.0035 | -0.0106 | -0.0021 |         |
|       | ( 60.54%) | -0.7781* | H 109        | s( 99.95%)p 0.00( 0.05%)                | -0.9998 | -0.0022 | -0.0005 | 0.0161  | 0.0015  |
|       |           |          |              |                                         | 0.0143  |         |         |         |         |
| 1589. | (0.00695) | BD*( 1)  | C 55 - H 110 |                                         |         |         |         |         |         |
|       | ( 37.83%) | 0.6151*  | C 55         | s( 24.50%)p 3.08( 75.45%)d 0.00( 0.05%) | 0.0001  | -0.4949 | 0.0072  | 0.0057  | -0.0004 |
|       |           |          |              |                                         | -0.2873 | -0.0032 | 0.0034  | -0.1782 | -0.0096 |
|       |           |          |              |                                         | -0.0006 | 0.7999  | 0.0022  | -0.0116 | -0.0025 |
|       |           |          |              |                                         | 0.0118  | 0.0074  | -0.0015 | -0.0174 |         |
|       | ( 62.17%) | -0.7885* | H 110        | s( 99.96%)p 0.00( 0.04%)                | -0.9998 | -0.0013 | -0.0005 | 0.0067  | 0.0041  |
|       |           |          |              |                                         | -0.0190 |         |         |         |         |
| 1590. | (0.00705) | BD*( 1)  | C 56 - H 102 |                                         |         |         |         |         |         |

( 39.21%) 0.6262\* C 56 s( 23.09%)p 3.33( 76.87%)d 0.00( 0.04%)  
-0.0001 0.4804 0.0089 -0.0041 0.0003  
-0.1249 0.0045 0.0059 -0.4190 0.0112  
-0.0062 -0.7598 0.0050 -0.0113 0.0016  
0.0052 0.0150 -0.0034 0.0124

( 60.79%) -0.7796\* H 102 s( 99.96%)p 0.00( 0.04%)  
0.9998 0.0012 0.0004 0.0046 0.0103  
0.0177

1591. (0.00748) BD\*( 1) C 56 - H 103  
( 37.69%) 0.6139\* C 56 s( 24.65%)p 3.05( 75.30%)d 0.00( 0.05%)  
0.0001 -0.4964 0.0083 -0.0062 -0.0004  
-0.1525 -0.0073 0.0016 -0.8364 -0.0016  
0.0132 0.1727 0.0074 -0.0005 -0.0066  
0.0012 0.0073 0.0176 0.0098

( 62.31%) -0.7894\* H 103 s( 99.96%)p 0.00( 0.04%)  
-0.9998 -0.0011 -0.0006 0.0026 0.0199  
-0.0040

1592. (0.01059) BD\*( 1) C 56 - H 104  
( 39.63%) 0.6295\* C 56 s( 23.63%)p 3.23( 76.33%)d 0.00( 0.04%)  
0.0000 -0.4860 -0.0113 0.0023 0.0002  
-0.7103 -0.0046 -0.0105 0.3397 -0.0091  
0.0063 -0.3781 0.0071 0.0016 0.0117  
-0.0129 0.0048 -0.0092 0.0039

( 60.37%) -0.7770\* H 104 s( 99.95%)p 0.00( 0.05%)  
-0.9998 -0.0021 -0.0004 0.0171 -0.0087  
0.0098

1593. (0.00670) BD\*( 1) C 57 - H 123  
( 38.50%) 0.6205\* C 57 s( 23.50%)p 3.25( 76.46%)d 0.00( 0.04%)  
-0.0001 0.4847 0.0041 0.0020 0.0001  
-0.5723 -0.0021 -0.0032 0.4761 -0.0065  
-0.0046 -0.4584 0.0106 -0.0079 -0.0142  
0.0113 -0.0100 0.0025 -0.0011

( 61.50%) -0.7842\* H 123 s( 99.96%)p 0.00( 0.04%)  
0.9998 0.0012 0.0004 0.0127 -0.0134  
0.0083

1594. (0.01162) BD\*( 1) C 57 - H 124  
( 40.02%) 0.6326\* C 57 s( 23.56%)p 3.24( 76.39%)d 0.00( 0.04%)  
0.0000 0.4854 0.0081 0.0006 0.0002  
0.4578 -0.0030 -0.0070 -0.4864 -0.0027  
-0.0058 -0.5635 -0.0010 -0.0083 -0.0117  
-0.0125 0.0117 -0.0013 0.0034

( 59.98%) -0.7745\* H 124 s( 99.95%)p 0.00( 0.05%)  
0.9998 0.0023 0.0003 -0.0119 0.0110  
0.0138

1595. (0.00660) BD\*( 1) C 57 - H 125  
( 38.70%) 0.6221\* C 57 s( 23.93%)p 3.18( 76.03%)d 0.00( 0.05%)  
-0.0001 0.4891 0.0053 0.0007 -0.0002  
-0.4490 -0.0059 -0.0027 -0.5368 0.0079  
-0.0076 0.5200 -0.0042 -0.0040 0.0100  
-0.0131 -0.0132 -0.0020 0.0001

( 61.30%) -0.7829\* H 125 s( 99.96%)p 0.00( 0.04%)  
0.9998 0.0011 0.0002 0.0108 0.0112  
-0.0135

1596. (0.00758) BD\*( 1) C 58 - H 132  
( 39.36%) 0.6274\* C 58 s( 23.09%)p 3.33( 76.87%)d 0.00( 0.04%)  
0.0001 -0.4804 -0.0080 -0.0036 -0.0002  
-0.2234 0.0081 -0.0016 -0.3950 0.0048  
0.0023 -0.7500 0.0068 -0.0126 -0.0032  
-0.0085 -0.0141 0.0025 -0.0120

( 60.64%) -0.7787\* H 132 s( 99.96%)p 0.00( 0.04%)  
-0.9998 -0.0014 -0.0004 0.0059 0.0111  
0.0167

1597. (0.00692) BD\*( 1) C 58 - H 133  
( 38.18%) 0.6179\* C 58 s( 24.40%)p 3.10( 75.55%)d 0.00( 0.05%)  
-0.0001 0.4939 -0.0070 -0.0052 0.0004  
-0.8601 -0.0056 0.0119 -0.1241 -0.0047  
0.0003 0.0054 0.0077 0.0028 0.0057  
-0.0005 0.0003 0.0187 -0.0115

( 61.82%) -0.7863\* H 133 s( 99.96%)p 0.00( 0.04%)  
0.9998 0.0014 0.0005 0.0201 0.0021  
0.0004

1598. (0.01074) BD\*( 1) C 58 - H 134  
( 39.69%) 0.6300\* C 58 s( 23.52%)p 3.25( 76.43%)d 0.00( 0.04%)  
0.0000 0.4849 0.0112 0.0019 -0.0002  
0.3910 -0.0078 0.0021 -0.7816 0.0017  
-0.0107 -0.0156 0.0035 0.0073 -0.0146  
0.0010 0.0014 -0.0108 -0.0106  
( 60.31%) -0.7766\* H 134 s( 99.95%)p 0.00( 0.05%)  
0.9998 0.0022 0.0004 -0.0102 0.0189  
0.0016

1599. (0.00771) BD\*( 1) C 59 - H 111  
( 39.41%) 0.6278\* C 59 s( 23.12%)p 3.32( 76.83%)d 0.00( 0.04%)  
0.0001 -0.4808 -0.0062 -0.0028 -0.0002  
-0.7326 0.0062 0.0007 0.3229 0.0010  
0.0064 -0.3567 0.0033 -0.0094 0.0117  
-0.0122 0.0040 -0.0104 0.0051  
( 60.59%) -0.7784\* H 111 s( 99.96%)p 0.00( 0.04%)  
-0.9998 -0.0015 -0.0003 0.0185 -0.0068  
0.0076

1600. (0.01068) BD\*( 1) C 59 - H 112  
( 39.58%) 0.6291\* C 59 s( 23.63%)p 3.23( 76.33%)d 0.00( 0.04%)  
0.0000 -0.4861 -0.0067 -0.0010 0.0000  
0.4396 0.0039 0.0004 -0.4197 0.0069  
0.0036 -0.6274 -0.0004 -0.0087 0.0091  
0.0121 -0.0129 -0.0015 -0.0056  
( 60.42%) -0.7773\* H 112 s( 99.95%)p 0.00( 0.05%)  
-0.9998 -0.0022 -0.0004 -0.0106 0.0117  
0.0148

1601. (0.00685) BD\*( 1) C 59 - H 113  
( 38.27%) 0.6186\* C 59 s( 24.28%)p 3.12( 75.68%)d 0.00( 0.05%)  
-0.0001 0.4927 0.0030 -0.0004 -0.0002  
-0.4846 -0.0001 0.0024 -0.6685 0.0025  
-0.0050 -0.2739 0.0040 0.0062 0.0150  
0.0067 0.0093 -0.0044 -0.0090  
( 61.73%) -0.7857\* H 113 s( 99.96%)p 0.00( 0.04%)  
0.9998 0.0012 -0.0001 0.0108 0.0140  
0.0087

1602. (0.00651) BD\*( 1) C 60 - H 120  
( 38.58%) 0.6211\* C 60 s( 23.28%)p 3.29( 76.67%)d 0.00( 0.04%)  
-0.0001 0.4824 0.0097 0.0039 0.0000  
-0.0866 -0.0017 -0.0098 -0.1992 -0.0066  
0.0015 -0.8480 0.0147 -0.0107 -0.0006  
0.0031 0.0079 -0.0023 0.0189  
( 61.42%) -0.7837\* H 120 s( 99.96%)p 0.00( 0.04%)  
0.9998 0.0010 0.0004 -0.0003 0.0066  
0.0194

1603. (0.00663) BD\*( 1) C 60 - H 121  
( 38.24%) 0.6184\* C 60 s( 24.34%)p 3.11( 75.61%)d 0.00( 0.05%)  
0.0001 -0.4933 0.0075 0.0046 -0.0002  
0.4301 0.0099 -0.0043 0.5960 0.0072  
-0.0087 -0.4643 0.0061 0.0081 -0.0134  
0.0108 0.0142 0.0045 0.0019  
( 61.76%) -0.7859\* H 121 s( 99.96%)p 0.00( 0.04%)  
-0.9998 -0.0011 -0.0005 -0.0084 -0.0155  
0.0093

1604. (0.01163) BD\*( 1) C 60 - H 122  
( 40.17%) 0.6338\* C 60 s( 23.50%)p 3.25( 76.46%)d 0.00( 0.04%)  
0.0000 -0.4846 -0.0110 -0.0022 -0.0001  
0.3784 0.0047 0.0115 -0.7770 0.0058  
-0.0074 -0.1321 -0.0001 0.0044 0.0143  
0.0025 -0.0044 0.0116 0.0083  
( 59.83%) -0.7735\* H 122 s( 99.95%)p 0.00( 0.05%)  
-0.9998 -0.0022 -0.0004 -0.0079 0.0195  
0.0032

1605. (0.00764) BD\*( 1) C 61 - H 96  
( 39.38%) 0.6276\* C 61 s( 23.12%)p 3.32( 76.84%)d 0.00( 0.04%)  
0.0001 -0.4807 -0.0079 -0.0038 -0.0002  
0.0046 -0.0065 -0.0014 -0.2164 0.0009  
-0.0106 -0.8493 0.0096 -0.0083 0.0013  
0.0001 -0.0080 0.0012 -0.0189  
( 60.62%) -0.7786\* H 96 s( 99.96%)p 0.00( 0.04%)  
-0.9998 -0.0014 -0.0004 -0.0009 0.0037

0.0205

1606. (0.00685) BD\*( 1) C 61 - H 97  
 ( 38.03%) 0.6167\* C 61 s( 24.44%)p 3.09( 75.51%)d 0.00( 0.05%)  
 0.0001 -0.4943 0.0071 0.0055 -0.0004  
 -0.8263 -0.0065 0.0111 0.0357 -0.0087  
 -0.0030 0.2660 -0.0016 -0.0048 0.0014  
 0.0112 -0.0003 -0.0177 0.0078  
 ( 61.97%) -0.7872\* H 97 s( 99.96%)p 0.00( 0.04%)  
 -0.9998 -0.0014 -0.0005 0.0195 -0.0012  
 -0.0061

1607. (0.01033) BD\*( 1) C 61 - H 98  
 ( 39.51%) 0.6286\* C 61 s( 23.60%)p 3.24( 76.36%)d 0.00( 0.04%)  
 0.0000 -0.4857 -0.0110 -0.0019 0.0002  
 0.4043 -0.0101 0.0012 -0.6376 -0.0009  
 -0.0127 0.4397 -0.0012 0.0006 0.0130  
 -0.0080 0.0128 0.0059 0.0014  
 ( 60.49%) -0.7777\* H 98 s( 99.95%)p 0.00( 0.05%)  
 -0.9998 -0.0021 -0.0003 -0.0107 0.0148  
 -0.0114

1608. (0.00677) BD\*( 1) C 62 - H 87  
 ( 39.38%) 0.6276\* C 62 s( 22.95%)p 3.36( 77.01%)d 0.00( 0.04%)  
 0.0001 -0.4790 -0.0048 -0.0031 -0.0001  
 -0.4665 -0.0025 -0.0026 0.7245 -0.0094  
 0.0016 0.1651 0.0002 0.0088 0.0160  
 0.0020 -0.0059 0.0077 0.0091  
 ( 60.62%) -0.7786\* H 87 s( 99.96%)p 0.00( 0.04%)  
 -0.9998 -0.0010 -0.0004 0.0104 -0.0174  
 -0.0020

1609. (0.01126) BD\*( 1) C 62 - H 88  
 ( 39.97%) 0.6322\* C 62 s( 23.44%)p 3.26( 76.52%)d 0.00( 0.05%)  
 0.0000 -0.4841 -0.0073 -0.0009 -0.0001  
 0.6110 -0.0038 -0.0039 -0.0685 -0.0033  
 0.0011 0.6221 0.0039 0.0118 0.0025  
 -0.0190 0.0006 -0.0079 -0.0045  
 ( 60.03%) -0.7748\* H 88 s( 99.96%)p 0.00( 0.04%)  
 -0.9998 -0.0022 -0.0003 -0.0154 0.0015  
 -0.0145

1610. (0.00967) BD\*( 1) C 62 - H 89  
 ( 36.82%) 0.6068\* C 62 s( 25.12%)p 2.98( 74.84%)d 0.00( 0.05%)  
 0.0001 -0.5011 -0.0065 0.0008 0.0002  
 -0.5279 -0.0010 -0.0013 -0.6832 0.0088  
 -0.0011 0.0533 -0.0011 0.0090 -0.0174  
 -0.0007 0.0019 0.0040 0.0120  
 ( 63.18%) -0.7948\* H 89 s( 99.95%)p 0.00( 0.05%)  
 -0.9997 -0.0022 0.0000 0.0130 0.0184  
 0.0042

NHO Directionality and "Bond Bending" (deviations from line of nuclear centers)

[Thresholds for printing: angular deviation > 1.0 degree]  
 hybrid p-character > 25.0%  
 orbital occupancy > 0.10e

| NBO                    | Line of Centers |       | Hybrid 1 |       |      | Hybrid 2 |       |      |
|------------------------|-----------------|-------|----------|-------|------|----------|-------|------|
|                        | Theta           | Phi   | Theta    | Phi   | Dev  | Theta    | Phi   | Dev  |
| 1. BD ( 1) C 1 - O 2   | 161.8           | 128.3 | 160.9    | 122.8 | 2.0  | 17.4     | 316.1 | 2.5  |
| 2. BD ( 2) C 1 - O 2   | 161.8           | 128.3 | 108.0    | 286.0 | 88.9 | 105.8    | 284.2 | 89.2 |
| 3. BD ( 1) C 1 - B 14  | 46.2            | 4.9   | 71.1     | 10.8  | 25.4 | 153.5    | 176.6 | 20.2 |
| 4. BD ( 1) C 1 - B 15  | 24.7            | 247.1 | 50.6     | 211.4 | 33.0 | 159.6    | 128.4 | 22.8 |
| 5. BD ( 1) C 3 - C 4   | 63.0            | 330.8 | 64.0     | 330.1 | 1.2  | --       | --    | --   |
| 6. BD ( 1) C 3 - C 8   | 56.4            | 133.5 | 57.6     | 133.9 | 1.2  | 125.8    | 312.7 | 2.4  |
| 7. BD ( 2) C 3 - C 8   | 56.4            | 133.5 | 77.0     | 233.3 | 90.8 | 104.1    | 53.2  | 90.0 |
| 8. BD ( 1) C 3 - C 53  | 167.9           | 215.3 | 166.7    | 216.9 | 1.2  | 10.9     | 38.0  | 1.3  |
| 9. BD ( 1) C 4 - C 5   | 16.8            | 36.9  | --       | --    | --   | 163.4    | 221.3 | 1.3  |
| 10. BD ( 2) C 4 - C 5  | 16.8            | 36.9  | 75.1     | 234.4 | 91.2 | 73.2     | 235.0 | 90.8 |
| 11. BD ( 1) C 4 - N 9  | 122.0           | 315.1 | --       | --    | --   | 59.9     | 135.9 | 2.0  |
| 12. BD ( 1) C 5 - C 6  | 58.7            | 134.7 | 57.6     | 133.9 | 1.2  | 118.9    | 315.7 | 2.5  |
| 13. BD ( 1) C 5 - C 51 | 64.3            | 334.6 | 64.5     | 333.3 | 1.2  | --       | --    | --   |

|       |     |   |    |   |    |   |   |    |       |       |       |       |      |       |       |      |
|-------|-----|---|----|---|----|---|---|----|-------|-------|-------|-------|------|-------|-------|------|
| 14.   | BD  | ( | 1) | C | 6  | - | C | 7  | 115.5 | 151.6 | 110.8 | 150.7 | 4.7  | 59.9  | 332.6 | 4.7  |
| 15.   | BD  | ( | 2) | C | 6  | - | C | 7  | 115.5 | 151.6 | 105.4 | 54.6  | 89.5 | 104.9 | 53.9  | 89.7 |
| 17.   | BD  | ( | 1) | C | 7  | - | C | 8  | 164.9 | 219.8 | 163.0 | 204.9 | 4.5  | 14.3  | 57.0  | 4.4  |
| 20.   | BD  | ( | 1) | N | 9  | - | C | 10 | 96.6  | 263.2 | 96.3  | 259.4 | 3.8  | 81.9  | 87.8  | 4.8  |
| 21.   | BD  | ( | 2) | N | 9  | - | C | 10 | 96.6  | 263.2 | 149.3 | 156.8 | 92.6 | 27.0  | 339.4 | 90.3 |
| 22.   | BD  | ( | 1) | N | 9  | - | C | 13 | 112.1 | 18.8  | 110.9 | 22.1  | 3.2  | 66.7  | 192.0 | 6.4  |
| 23.   | BD  | ( | 1) | C | 10 | - | N | 11 | 117.3 | 341.4 | 118.4 | 335.3 | 5.5  | 63.9  | 165.8 | 4.1  |
| 24.   | BD  | ( | 1) | C | 10 | - | B | 14 | 82.6  | 211.6 | 75.4  | 215.3 | 8.0  | 90.0  | 27.9  | 8.3  |
| 25.   | BD  | ( | 1) | N | 11 | - | C | 12 | 98.8  | 52.6  | 99.3  | 49.4  | 3.2  | 83.8  | 238.4 | 6.3  |
| 26.   | BD  | ( | 1) | N | 11 | - | C | 41 | 102.0 | 287.1 | 103.4 | 285.3 | 2.3  | 79.3  | 109.1 | 2.4  |
| 27.   | BD  | ( | 2) | N | 11 | - | C | 41 | 102.0 | 287.1 | 154.5 | 162.9 | 92.8 | 14.9  | 352.2 | 84.5 |
| 28.   | BD  | ( | 1) | C | 12 | - | C | 13 | 68.8  | 119.8 | 72.1  | 109.9 | 9.9  | 114.1 | 310.0 | 9.9  |
| 29.   | BD  | ( | 2) | C | 12 | - | C | 13 | 68.8  | 119.8 | 152.7 | 161.1 | 90.0 | 152.7 | 160.8 | 90.0 |
| 30.   | BD  | ( | 1) | C | 12 | - | H | 71 | 116.6 | 353.3 | 116.6 | 354.9 | 1.4  | --    | --    | --   |
| 31.   | BD  | ( | 1) | C | 13 | - | H | 72 | 88.4  | 73.7  | 89.1  | 72.6  | 1.3  | --    | --    | --   |
| 32.   | BD  | ( | 1) | B | 14 | - | B | 15 | 81.2  | 205.6 | 46.3  | 226.0 | 39.1 | 67.8  | 13.8  | 33.1 |
| 33.   | BD  | ( | 1) | B | 15 | - | C | 16 | 63.9  | 215.9 | 60.0  | 215.7 | 3.9  | 112.6 | 36.8  | 3.6  |
| 34.   | BD  | ( | 1) | C | 16 | - | N | 17 | 107.2 | 182.2 | 111.5 | 179.6 | 4.9  | 76.4  | 3.4   | 3.8  |
| 35.   | BD  | ( | 2) | C | 16 | - | N | 17 | 107.2 | 182.2 | 49.5  | 107.9 | 89.7 | 133.0 | 286.0 | 92.1 |
| 36.   | BD  | ( | 1) | C | 16 | - | N | 20 | 42.0  | 273.8 | 41.6  | 282.0 | 5.5  | 137.9 | 88.7  | 3.4  |
| 37.   | BD  | ( | 1) | N | 17 | - | C | 18 | 57.1  | 232.0 | 58.7  | 228.5 | 3.3  | 126.5 | 58.5  | 6.5  |
| 38.   | BD  | ( | 1) | N | 17 | - | C | 21 | 133.3 | 126.1 | 134.7 | 125.7 | 1.4  | 47.1  | 307.7 | 1.3  |
| 39.   | BD  | ( | 1) | C | 18 | - | C | 19 | 48.9  | 327.4 | 45.1  | 314.5 | 10.2 | 126.0 | 158.8 | 10.2 |
| 40.   | BD  | ( | 2) | C | 18 | - | C | 19 | 48.9  | 327.4 | 131.8 | 287.7 | 90.3 | 131.5 | 288.3 | 90.2 |
| 41.   | BD  | ( | 1) | C | 18 | - | H | 63 | 99.0  | 189.3 | 98.0  | 190.4 | 1.5  | --    | --    | --   |
| 42.   | BD  | ( | 1) | C | 19 | - | N | 20 | 98.6  | 25.8  | 93.8  | 21.2  | 6.6  | 79.0  | 208.0 | 3.3  |
| 43.   | BD  | ( | 1) | C | 19 | - | H | 64 | 45.5  | 259.2 | 46.1  | 257.3 | 1.5  | --    | --    | --   |
| 44.   | BD  | ( | 1) | N | 20 | - | C | 31 | 54.3  | 346.8 | 56.2  | 345.7 | 2.1  | 126.5 | 166.0 | 1.0  |
| 45.   | BD  | ( | 1) | C | 21 | - | C | 22 | 163.2 | 270.9 | 162.1 | 271.3 | 1.1  | 15.4  | 89.6  | 1.4  |
| 46.   | BD  | ( | 1) | C | 21 | - | C | 26 | 71.6  | 119.4 | 70.5  | 119.6 | 1.2  | 106.8 | 299.2 | 1.6  |
| 47.   | BD  | ( | 2) | C | 21 | - | C | 26 | 71.6  | 119.4 | 97.5  | 30.6  | 91.2 | 98.0  | 32.4  | 90.3 |
| 48.   | BD  | ( | 1) | C | 22 | - | C | 23 | 130.9 | 129.4 | 132.2 | 130.0 | 1.4  | 51.3  | 308.8 | 2.3  |
| 49.   | BD  | ( | 2) | C | 22 | - | C | 23 | 130.9 | 129.4 | 98.3  | 30.7  | 91.1 | 98.4  | 31.9  | 89.9 |
| 51.   | BD  | ( | 1) | C | 23 | - | C | 24 | 73.0  | 119.3 | 77.4  | 120.0 | 4.4  | 111.4 | 298.5 | 4.5  |
| 53.   | BD  | ( | 1) | C | 24 | - | C | 25 | 15.5  | 89.1  | 19.5  | 97.3  | 4.6  | 167.9 | 256.1 | 4.6  |
| 54.   | BD  | ( | 2) | C | 24 | - | C | 25 | 15.5  | 89.1  | 98.4  | 31.8  | 89.9 | 81.3  | 211.8 | 90.2 |
| 56.   | BD  | ( | 1) | C | 25 | - | C | 26 | 46.6  | 310.1 | 44.2  | 310.8 | 2.4  | 132.1 | 129.8 | 1.3  |
| 59.   | BD  | ( | 1) | C | 27 | - | C | 28 | 88.0  | 229.5 | 87.2  | 230.2 | 1.0  | --    | --    | --   |
| 71.   | BD  | ( | 1) | C | 31 | - | C | 32 | 29.4  | 82.3  | --    | --    | --   | 150.9 | 259.7 | 1.3  |
| 72.   | BD  | ( | 1) | C | 31 | - | C | 36 | 106.5 | 313.2 | --    | --    | --   | 74.8  | 133.6 | 1.3  |
| 73.   | BD  | ( | 2) | C | 31 | - | C | 36 | 106.5 | 313.2 | 117.3 | 53.8  | 91.5 | 117.8 | 51.0  | 91.0 |
| 74.   | BD  | ( | 1) | C | 32 | - | C | 33 | 53.9  | 344.5 | 52.8  | 345.2 | 1.3  | 124.0 | 162.8 | 2.5  |
| 75.   | BD  | ( | 2) | C | 32 | - | C | 33 | 53.9  | 344.5 | 116.0 | 53.7  | 90.1 | 116.8 | 53.0  | 89.9 |
| 77.   | BD  | ( | 1) | C | 33 | - | C | 34 | 105.5 | 314.3 | 101.7 | 316.9 | 4.5  | 70.6  | 131.8 | 4.5  |
| 79.   | BD  | ( | 1) | C | 34 | - | C | 35 | 150.2 | 258.8 | 148.1 | 266.5 | 4.5  | 28.2  | 70.2  | 4.5  |
| 80.   | BD  | ( | 2) | C | 34 | - | C | 35 | 150.2 | 258.8 | 62.9  | 232.3 | 89.9 | 62.8  | 231.9 | 89.9 |
| 82.   | BD  | ( | 1) | C | 35 | - | C | 36 | 128.4 | 165.6 | 130.4 | 167.3 | 2.4  | 52.7  | 344.8 | 1.3  |
| 97.   | BD  | ( | 1) | C | 41 | - | C | 42 | 150.7 | 237.0 | 135.8 | 243.9 | 15.5 | 29.8  | 59.2  | 1.2  |
| 98.   | BD  | ( | 1) | C | 41 | - | C | 46 | 49.7  | 322.6 | 71.6  | 318.2 | 22.2 | 129.2 | 141.7 | 1.2  |
| 99.   | BD  | ( | 2) | C | 41 | - | C | 46 | 49.7  | 322.6 | 110.4 | 25.0  | 83.8 | 63.1  | 207.9 | 90.5 |
| 100.  | BD  | ( | 1) | C | 42 | - | C | 43 | 102.1 | 291.6 | 102.8 | 290.5 | 1.3  | 79.8  | 113.2 | 2.4  |
| 101.  | BD  | ( | 2) | C | 42 | - | C | 43 | 102.1 | 291.6 | 64.4  | 206.6 | 90.8 | 116.0 | 28.1  | 89.6 |
| 103.  | BD  | ( | 1) | C | 43 | - | C | 44 | 50.7  | 322.0 | 54.2  | 318.6 | 4.4  | 132.9 | 145.7 | 4.6  |
| 105.  | BD  | ( | 1) | C | 44 | - | C | 45 | 29.9  | 59.0  | 28.1  | 50.0  | 4.7  | 147.7 | 246.9 | 4.7  |
| 106.  | BD  | ( | 2) | C | 44 | - | C | 45 | 29.9  | 59.0  | 116.4 | 28.2  | 90.1 | 116.3 | 28.3  | 90.0 |
| 108.  | BD  | ( | 1) | C | 45 | - | C | 46 | 75.6  | 110.7 | 73.3  | 109.8 | 2.5  | 103.2 | 290.9 | 1.2  |
| 112.  | BD  | ( | 1) | C | 47 | - | C | 57 | 121.9 | 225.8 | 121.4 | 226.9 | 1.0  | --    | --    | --   |
| 158.  | BD  | ( | 1) | C | 62 | - | H | 89 | 92.6  | 52.5  | 94.1  | 51.9  | 1.6  | --    | --    | --   |
| 221.  | LP  | ( | 1) | O | 2  |   |   |    | --    | --    | 163.2 | 113.8 | --   | --    | --    | --   |
| 222.  | LP  | ( | 2) | O | 2  |   |   |    | --    | --    | 83.9  | 196.1 | --   | --    | --    | --   |
| 223.  | LP* | ( | 1) | B | 14 |   |   |    | --    | --    | 74.6  | 119.0 | --   | --    | --    | --   |
| 224.  | LP  | ( | 1) | B | 15 |   |   |    | --    | --    | 69.5  | 112.8 | --   | --    | --    | --   |
| 225.  | LP  | ( | 1) | N | 20 |   |   |    | --    | --    | 130.1 | 289.5 | --   | --    | --    | --   |
| 1454. | BD* | ( | 2) | C | 1  | - | O | 2  | 161.8 | 128.3 | 108.0 | 286.0 | 88.9 | 105.8 | 284.2 | 89.2 |
| 1455. | BD* | ( | 1) | C | 1  | - | B | 14 | 46.2  | 4.9   | 71.1  | 10.8  | 25.4 | 153.5 | 176.6 | 20.2 |
| 1459. | BD* | ( | 2) | C | 3  | - | C | 8  | 56.4  | 133.5 | 77.0  | 233.3 | 90.8 | 104.1 | 53.2  | 90.0 |
| 1462. | BD* | ( | 2) | C | 4  | - | C | 5  | 16.8  | 36.9  | 75.1  | 234.4 | 91.2 | 73.2  | 235.0 | 90.8 |
| 1467. | BD* | ( | 2) | C | 6  | - | C | 7  | 115.5 | 151.6 | 105.4 | 54.6  | 89.5 | 104.9 | 53.9  | 89.7 |
| 1473. | BD* | ( | 2) | N | 9  | - | C | 10 | 96.6  | 263.2 | 149.3 | 156.8 | 92.6 | 27.0  | 339.4 | 90.3 |
| 1479. | BD* | ( | 2) | N | 11 | - | C | 41 | 102.0 | 287.1 | 154.5 | 162.9 | 92.8 | 14.9  | 352.2 | 84.5 |
| 1481. | BD* | ( | 2) | C | 12 | - | C | 13 | 68.8  | 119.8 | 152.7 | 161.1 | 90.0 | 152.7 | 160.8 | 90.0 |

|       |      |    |   |    |   |   |    |       |       |       |       |      |       |       |      |
|-------|------|----|---|----|---|---|----|-------|-------|-------|-------|------|-------|-------|------|
| 1487. | BD*( | 2) | C | 16 | - | N | 17 | 107.2 | 182.2 | 49.5  | 107.9 | 89.7 | 133.0 | 286.0 | 92.1 |
| 1492. | BD*( | 2) | C | 18 | - | C | 19 | 48.9  | 327.4 | 131.8 | 287.7 | 90.3 | 131.5 | 288.3 | 90.2 |
| 1499. | BD*( | 2) | C | 21 | - | C | 26 | 71.6  | 119.4 | 97.5  | 30.6  | 91.2 | 98.0  | 32.4  | 90.3 |
| 1501. | BD*( | 2) | C | 22 | - | C | 23 | 130.9 | 129.4 | 98.3  | 30.7  | 91.1 | 98.4  | 31.9  | 89.9 |
| 1506. | BD*( | 2) | C | 24 | - | C | 25 | 15.5  | 89.1  | 98.4  | 31.8  | 89.9 | 81.3  | 211.8 | 90.2 |
| 1525. | BD*( | 2) | C | 31 | - | C | 36 | 106.5 | 313.2 | 117.3 | 53.8  | 91.5 | 117.8 | 51.0  | 91.0 |
| 1527. | BD*( | 2) | C | 32 | - | C | 33 | 53.9  | 344.5 | 116.0 | 53.7  | 90.1 | 116.8 | 53.0  | 89.9 |
| 1532. | BD*( | 2) | C | 34 | - | C | 35 | 150.2 | 258.8 | 62.9  | 232.3 | 89.9 | 62.8  | 231.9 | 89.9 |
| 1551. | BD*( | 2) | C | 41 | - | C | 46 | 49.7  | 322.6 | 110.4 | 25.0  | 83.8 | 63.1  | 207.9 | 90.5 |
| 1553. | BD*( | 2) | C | 42 | - | C | 43 | 102.1 | 291.6 | 64.4  | 206.6 | 90.8 | 116.0 | 28.1  | 89.6 |
| 1558. | BD*( | 2) | C | 44 | - | C | 45 | 29.9  | 59.0  | 116.4 | 28.2  | 90.1 | 116.3 | 28.3  | 90.0 |

Second Order Perturbation Theory Analysis of Fock Matrix in NBO Basis

Threshold for printing: 0.50 kcal/mol

| F(i,j) | Donor NBO (i) | Acceptor NBO (j) | E(2)<br>kcal/mol | E(j)-E(i)<br>a.u. |
|--------|---------------|------------------|------------------|-------------------|
|--------|---------------|------------------|------------------|-------------------|

```

=====
===
within unit 1
1. BD ( 1) C 1 - O 2 /226. RY*( 1) C 1 1.44 1.92
0.047
1. BD ( 1) C 1 - O 2 /422. RY*( 1) B 15 0.51 2.53
0.032
1. BD ( 1) C 1 - O 2 /***. BD*( 1) C 1 - B 14 1.51 1.24
0.040
1. BD ( 1) C 1 - O 2 /***. BD*( 1) C 1 - B 15 2.00 1.35
0.047
2. BD ( 2) C 1 - O 2 /223. LP*( 1) B 14 2.48 0.29
0.028
2. BD ( 2) C 1 - O 2 /224. LP ( 1) B 15 3.43 0.29
0.035
2. BD ( 2) C 1 - O 2 /***. BD*( 2) C 1 - O 2 0.94 0.30
0.017
3. BD ( 1) C 1 - B 14 /224. LP ( 1) B 15 0.67 0.35
0.015
3. BD ( 1) C 1 - B 14 /229. RY*( 4) C 1 0.56 2.08
0.033
3. BD ( 1) C 1 - B 14 /240. RY*( 1) O 2 1.23 1.18
0.037
3. BD ( 1) C 1 - B 14 /242. RY*( 3) O 2 0.77 1.58
0.034
3. BD ( 1) C 1 - B 14 /***. BD*( 1) C 1 - B 14 1.69 0.65
0.031
3. BD ( 1) C 1 - B 14 /***. BD*( 1) C 1 - B 15 10.68 0.77
0.086
3. BD ( 1) C 1 - B 14 /***. BD*( 1) N 9 - C 10 0.64 0.67
0.020
3. BD ( 1) C 1 - B 14 /***. BD*( 2) N 9 - C 10 11.08 0.27
0.055
3. BD ( 1) C 1 - B 14 /***. BD*( 1) B 14 - B 15 10.07 0.80
0.086
3. BD ( 1) C 1 - B 14 /***. BD*( 1) B 15 - C 16 28.64 0.73
0.138
4. BD ( 1) C 1 - B 15 /223. LP*( 1) B 14 1.99 0.43
0.030
4. BD ( 1) C 1 - B 15 /240. RY*( 1) O 2 1.35 1.26
0.038
4. BD ( 1) C 1 - B 15 /242. RY*( 3) O 2 1.28 1.66
0.043
4. BD ( 1) C 1 - B 15 /413. RY*( 6) B 14 0.78 3.86
0.051
4. BD ( 1) C 1 - B 15 /430. RY*( 9) B 15 1.15 6.86
0.082
4. BD ( 1) C 1 - B 15 /433. RY*( 12) B 15 0.71 4.38
0.051

```

|       |                       |                             |       |      |
|-------|-----------------------|-----------------------------|-------|------|
| 0.046 | 4. BD ( 1) C 1 - B 15 | /436. RY*( ( 1) C 16        | 1.14  | 2.22 |
| 0.040 | 4. BD ( 1) C 1 - B 15 | /***. BD*( ( 1) C 1 - O 2   | 2.08  | 0.92 |
| 0.054 | 4. BD ( 1) C 1 - B 15 | /***. BD*( ( 1) C 1 - B 14  | 4.92  | 0.74 |
| 0.025 | 4. BD ( 1) C 1 - B 15 | /***. BD*( ( 1) C 1 - B 15  | 0.87  | 0.85 |
| 0.095 | 4. BD ( 1) C 1 - B 15 | /***. BD*( ( 1) C 10 - B 14 | 12.72 | 0.84 |
| 0.054 | 4. BD ( 1) C 1 - B 15 | /***. BD*( ( 1) B 14 - B 15 | 3.90  | 0.89 |
| 0.042 | 4. BD ( 1) C 1 - B 15 | /***. BD*( ( 1) B 15 - C 16 | 2.57  | 0.81 |
| 0.015 | 4. BD ( 1) C 1 - B 15 | /***. BD*( ( 2) C 16 - N 17 | 0.65  | 0.34 |
| 0.050 | 4. BD ( 1) C 1 - B 15 | /***. BD*( ( 1) C 16 - N 20 | 4.04  | 0.76 |
| 0.028 | 5. BD ( 1) C 3 - C 4  | /283. RY*( ( 2) C 5         | 0.63  | 1.59 |
| 0.029 | 5. BD ( 1) C 3 - C 4  | /338. RY*( ( 1) N 9         | 0.68  | 1.49 |
| 0.033 | 5. BD ( 1) C 3 - C 4  | /***. BD*( ( 1) C 3 - C 8   | 1.26  | 1.10 |
| 0.021 | 5. BD ( 1) C 3 - C 4  | /***. BD*( ( 1) C 3 - C 53  | 0.58  | 0.96 |
| 0.045 | 5. BD ( 1) C 3 - C 4  | /***. BD*( ( 1) C 4 - C 5   | 2.31  | 1.09 |
| 0.053 | 5. BD ( 1) C 3 - C 4  | /***. BD*( ( 1) C 5 - C 51  | 3.72  | 0.95 |
| 0.048 | 5. BD ( 1) C 3 - C 4  | /***. BD*( ( 1) C 8 - H 76  | 2.91  | 0.98 |
| 0.032 | 5. BD ( 1) C 3 - C 4  | /***. BD*( ( 1) N 9 - C 10  | 1.28  | 0.98 |
| 0.032 | 5. BD ( 1) C 3 - C 4  | /***. BD*( ( 1) N 9 - C 13  | 1.29  | 0.97 |
| 0.029 | 5. BD ( 1) C 3 - C 4  | /***. BD*( ( 1) C 53 - C 60 | 1.15  | 0.94 |
| 0.038 | 6. BD ( 1) C 3 - C 8  | /268. RY*( ( 1) C 4         | 0.88  | 1.98 |
| 0.037 | 6. BD ( 1) C 3 - C 8  | /311. RY*( ( 2) C 7         | 0.93  | 1.83 |
| 0.028 | 6. BD ( 1) C 3 - C 8  | /953. RY*( ( 1) C 53        | 0.58  | 1.68 |
| 0.036 | 6. BD ( 1) C 3 - C 8  | /***. BD*( ( 1) C 3 - C 4   | 1.47  | 1.09 |
| 0.023 | 6. BD ( 1) C 3 - C 8  | /***. BD*( ( 1) C 3 - C 53  | 0.71  | 0.96 |
| 0.062 | 6. BD ( 1) C 3 - C 8  | /***. BD*( ( 1) C 4 - N 9   | 5.06  | 0.94 |
| 0.037 | 6. BD ( 1) C 3 - C 8  | /***. BD*( ( 1) C 7 - C 8   | 1.57  | 1.11 |
| 0.044 | 6. BD ( 1) C 3 - C 8  | /***. BD*( ( 1) C 7 - H 77  | 2.54  | 0.97 |
| 0.026 | 6. BD ( 1) C 3 - C 8  | /***. BD*( ( 1) C 53 - H 82 | 0.84  | 0.98 |
| 0.028 | 7. BD ( 2) C 3 - C 8  | /312. RY*( ( 3) C 7         | 1.05  | 0.76 |
| 0.051 | 7. BD ( 2) C 3 - C 8  | /***. BD*( ( 2) C 4 - C 5   | 14.14 | 0.23 |
| 0.054 | 7. BD ( 2) C 3 - C 8  | /***. BD*( ( 2) C 6 - C 7   | 16.54 | 0.22 |
| 0.035 | 7. BD ( 2) C 3 - C 8  | /***. BD*( ( 1) C 53 - C 54 | 2.53  | 0.51 |
| 0.019 | 7. BD ( 2) C 3 - C 8  | /***. BD*( ( 1) C 53 - C 60 | 0.69  | 0.53 |
| 0.019 | 7. BD ( 2) C 3 - C 8  | /***. BD*( ( 1) C 53 - H 82 | 0.65  | 0.57 |
| 0.048 | 8. BD ( 1) C 3 - C 53 | /268. RY*( ( 1) C 4         | 1.49  | 1.90 |



|       |                       |                            |       |      |
|-------|-----------------------|----------------------------|-------|------|
| 0.037 | 8. BD ( 1) C 3 - C 53 | /324. RY*( 1) C 8          | 0.89  | 1.95 |
| 0.024 | 8. BD ( 1) C 3 - C 53 | /***. BD*( 1) C 3 - C 4    | 0.71  | 1.00 |
| 0.025 | 8. BD ( 1) C 3 - C 53 | /***. BD*( 1) C 3 - C 8    | 0.78  | 1.02 |
| 0.056 | 8. BD ( 1) C 3 - C 53 | /***. BD*( 1) C 4 - C 5    | 3.90  | 1.00 |
| 0.048 | 8. BD ( 1) C 3 - C 53 | /***. BD*( 1) C 7 - C 8    | 2.82  | 1.03 |
| 0.032 | 8. BD ( 1) C 3 - C 53 | /***. BD*( 1) C 54 - H 117 | 1.48  | 0.88 |
| 0.029 | 8. BD ( 1) C 3 - C 53 | /***. BD*( 1) C 60 - H 120 | 1.15  | 0.89 |
| 0.035 | 9. BD ( 1) C 4 - C 5  | /255. RY*( 2) C 3          | 0.86  | 1.72 |
| 0.027 | 9. BD ( 1) C 4 - C 5  | /297. RY*( 2) C 6          | 0.52  | 1.74 |
| 0.031 | 9. BD ( 1) C 4 - C 5  | /338. RY*( 1) N 9          | 0.80  | 1.49 |
| 0.045 | 9. BD ( 1) C 4 - C 5  | /***. BD*( 1) C 3 - C 4    | 2.31  | 1.09 |
| 0.052 | 9. BD ( 1) C 4 - C 5  | /***. BD*( 1) C 3 - C 53   | 3.52  | 0.97 |
| 0.019 | 9. BD ( 1) C 4 - C 5  | /***. BD*( 1) C 4 - N 9    | 0.50  | 0.94 |
| 0.035 | 9. BD ( 1) C 4 - C 5  | /***. BD*( 1) C 5 - C 6    | 1.40  | 1.10 |
| 0.021 | 9. BD ( 1) C 4 - C 5  | /***. BD*( 1) C 5 - C 51   | 0.60  | 0.95 |
| 0.047 | 9. BD ( 1) C 4 - C 5  | /***. BD*( 1) C 6 - H 78   | 2.88  | 0.98 |
| 0.034 | 9. BD ( 1) C 4 - C 5  | /***. BD*( 1) N 9 - C 10   | 1.48  | 0.98 |
| 0.023 | 9. BD ( 1) C 4 - C 5  | /***. BD*( 2) N 9 - C 10   | 0.76  | 0.59 |
| 0.024 | 9. BD ( 1) C 4 - C 5  | /***. BD*( 1) N 9 - C 13   | 0.72  | 0.97 |
| 0.021 | 9. BD ( 1) C 4 - C 5  | /***. BD*( 1) C 51 - C 52  | 0.59  | 0.91 |
| 0.022 | 9. BD ( 1) C 4 - C 5  | /***. BD*( 1) C 51 - C 59  | 0.65  | 0.92 |
| 0.033 | 10. BD ( 2) C 4 - C 5 | /298. RY*( 3) C 6          | 1.47  | 0.77 |
| 0.056 | 10. BD ( 2) C 4 - C 5 | /***. BD*( 2) C 3 - C 8    | 16.45 | 0.24 |
| 0.050 | 10. BD ( 2) C 4 - C 5 | /***. BD*( 2) C 6 - C 7    | 13.56 | 0.23 |
| 0.042 | 10. BD ( 2) C 4 - C 5 | /***. BD*( 1) N 9 - C 10   | 3.25  | 0.57 |
| 0.040 | 10. BD ( 2) C 4 - C 5 | /***. BD*( 1) N 9 - C 13   | 3.02  | 0.57 |
| 0.032 | 10. BD ( 2) C 4 - C 5 | /***. BD*( 1) C 51 - C 52  | 2.10  | 0.51 |
| 0.034 | 10. BD ( 2) C 4 - C 5 | /***. BD*( 1) C 51 - C 59  | 2.33  | 0.51 |
| 0.034 | 11. BD ( 1) C 4 - N 9 | /254. RY*( 1) C 3          | 0.71  | 2.07 |
| 0.031 | 11. BD ( 1) C 4 - N 9 | /282. RY*( 1) C 5          | 0.58  | 2.11 |
| 0.039 | 11. BD ( 1) C 4 - N 9 | /352. RY*( 1) C 10         | 0.82  | 2.35 |
| 0.033 | 11. BD ( 1) C 4 - N 9 | /395. RY*( 2) C 13         | 0.68  | 2.04 |
| 0.024 | 11. BD ( 1) C 4 - N 9 | /***. BD*( 1) C 3 - C 4    | 0.61  | 1.17 |
| 0.047 | 11. BD ( 1) C 4 - N 9 | /***. BD*( 1) C 3 - C 8    | 2.37  | 1.19 |
| 0.022 | 11. BD ( 1) C 4 - N 9 | /***. BD*( 1) C 4 - C 5    | 0.51  | 1.17 |

|       |                        |                            |       |      |
|-------|------------------------|----------------------------|-------|------|
| 0.046 | 11. BD ( 1) C 4 - N 9  | /***. BD*( 1) C 5 - C 6    | 2.28  | 1.18 |
| 0.027 | 11. BD ( 1) C 4 - N 9  | /***. BD*( 1) N 9 - C 10   | 0.84  | 1.06 |
| 0.022 | 11. BD ( 1) C 4 - N 9  | /***. BD*( 1) N 9 - C 13   | 0.56  | 1.05 |
| 0.034 | 11. BD ( 1) C 4 - N 9  | /***. BD*( 1) C 10 - N 11  | 1.32  | 1.06 |
| 0.029 | 11. BD ( 1) C 4 - N 9  | /***. BD*( 1) C 12 - C 13  | 0.87  | 1.21 |
| 0.037 | 12. BD ( 1) C 5 - C 6  | /268. RY*( 1) C 4          | 0.87  | 1.99 |
| 0.038 | 12. BD ( 1) C 5 - C 6  | /311. RY*( 2) C 7          | 0.96  | 1.84 |
| 0.032 | 12. BD ( 1) C 5 - C 6  | /925. RY*( 1) C 51         | 0.74  | 1.75 |
| 0.037 | 12. BD ( 1) C 5 - C 6  | /***. BD*( 1) C 4 - C 5    | 1.57  | 1.09 |
| 0.061 | 12. BD ( 1) C 5 - C 6  | /***. BD*( 1) C 4 - N 9    | 4.93  | 0.94 |
| 0.023 | 12. BD ( 1) C 5 - C 6  | /***. BD*( 1) C 5 - C 51   | 0.68  | 0.95 |
| 0.038 | 12. BD ( 1) C 5 - C 6  | /***. BD*( 1) C 6 - C 7    | 1.58  | 1.12 |
| 0.045 | 12. BD ( 1) C 5 - C 6  | /***. BD*( 1) C 7 - H 77   | 2.56  | 0.97 |
| 0.028 | 12. BD ( 1) C 5 - C 6  | /***. BD*( 1) C 51 - H 81  | 1.05  | 0.95 |
| 0.048 | 13. BD ( 1) C 5 - C 51 | /268. RY*( 1) C 4          | 1.49  | 1.91 |
| 0.038 | 13. BD ( 1) C 5 - C 51 | /296. RY*( 1) C 6          | 0.92  | 1.98 |
| 0.055 | 13. BD ( 1) C 5 - C 51 | /***. BD*( 1) C 3 - C 4    | 3.73  | 1.01 |
| 0.024 | 13. BD ( 1) C 5 - C 51 | /***. BD*( 1) C 4 - C 5    | 0.73  | 1.01 |
| 0.024 | 13. BD ( 1) C 5 - C 51 | /***. BD*( 1) C 5 - C 6    | 0.73  | 1.02 |
| 0.048 | 13. BD ( 1) C 5 - C 51 | /***. BD*( 1) C 6 - C 7    | 2.75  | 1.04 |
| 0.031 | 13. BD ( 1) C 5 - C 51 | /***. BD*( 1) C 52 - H 114 | 1.41  | 0.87 |
| 0.031 | 13. BD ( 1) C 5 - C 51 | /***. BD*( 1) C 59 - H 111 | 1.40  | 0.87 |
| 0.047 | 14. BD ( 1) C 6 - C 7  | /282. RY*( 1) C 5          | 1.36  | 2.04 |
| 0.029 | 14. BD ( 1) C 6 - C 7  | /324. RY*( 1) C 8          | 0.52  | 2.05 |
| 0.027 | 14. BD ( 1) C 6 - C 7  | /325. RY*( 2) C 8          | 0.58  | 1.62 |
| 0.040 | 14. BD ( 1) C 6 - C 7  | /***. BD*( 1) C 5 - C 6    | 1.81  | 1.11 |
| 0.056 | 14. BD ( 1) C 6 - C 7  | /***. BD*( 1) C 5 - C 51   | 4.01  | 0.96 |
| 0.037 | 14. BD ( 1) C 6 - C 7  | /***. BD*( 1) C 7 - C 8    | 1.49  | 1.12 |
| 0.045 | 14. BD ( 1) C 6 - C 7  | /***. BD*( 1) C 8 - H 76   | 2.55  | 0.99 |
| 0.050 | 15. BD ( 2) C 6 - C 7  | /***. BD*( 2) C 3 - C 8    | 13.21 | 0.24 |
| 0.055 | 15. BD ( 2) C 6 - C 7  | /***. BD*( 2) C 4 - C 5    | 16.26 | 0.23 |
| 0.050 | 16. BD ( 1) C 6 - H 78 | /282. RY*( 1) C 5          | 1.68  | 1.86 |
| 0.037 | 16. BD ( 1) C 6 - H 78 | /310. RY*( 1) C 7          | 1.01  | 1.66 |
| 0.062 | 16. BD ( 1) C 6 - H 78 | /***. BD*( 1) C 4 - C 5    | 5.20  | 0.91 |
| 0.054 | 16. BD ( 1) C 6 - H 78 | /***. BD*( 1) C 7 - C 8    | 3.89  | 0.94 |

|       |                        |                           |       |      |
|-------|------------------------|---------------------------|-------|------|
| 0.046 | 17. BD ( 1) C 7 - C 8  | /254. RY*( 1) C 3         | 1.30  | 1.99 |
| 0.031 | 17. BD ( 1) C 7 - C 8  | /297. RY*( 2) C 6         | 0.67  | 1.74 |
| 0.040 | 17. BD ( 1) C 7 - C 8  | /***. BD*( 1) C 3 - C 8   | 1.78  | 1.11 |
| 0.056 | 17. BD ( 1) C 7 - C 8  | /***. BD*( 1) C 3 - C 53  | 4.02  | 0.97 |
| 0.037 | 17. BD ( 1) C 7 - C 8  | /***. BD*( 1) C 6 - C 7   | 1.51  | 1.12 |
| 0.046 | 17. BD ( 1) C 7 - C 8  | /***. BD*( 1) C 6 - H 78  | 2.68  | 0.98 |
| 0.046 | 18. BD ( 1) C 7 - H 77 | /296. RY*( 1) C 6         | 1.42  | 1.88 |
| 0.046 | 18. BD ( 1) C 7 - H 77 | /324. RY*( 1) C 8         | 1.44  | 1.87 |
| 0.021 | 18. BD ( 1) C 7 - H 77 | /***. RY*( 1) H 78        | 0.51  | 1.07 |
| 0.058 | 18. BD ( 1) C 7 - H 77 | /***. BD*( 1) C 3 - C 8   | 4.55  | 0.93 |
| 0.058 | 18. BD ( 1) C 7 - H 77 | /***. BD*( 1) C 5 - C 6   | 4.50  | 0.93 |
| 0.049 | 19. BD ( 1) C 8 - H 76 | /254. RY*( 1) C 3         | 1.64  | 1.81 |
| 0.036 | 19. BD ( 1) C 8 - H 76 | /310. RY*( 1) C 7         | 1.00  | 1.66 |
| 0.061 | 19. BD ( 1) C 8 - H 76 | /***. BD*( 1) C 3 - C 4   | 5.19  | 0.91 |
| 0.055 | 19. BD ( 1) C 8 - H 76 | /***. BD*( 1) C 6 - C 7   | 3.97  | 0.94 |
| 0.024 | 20. BD ( 1) N 9 - C 10 | /223. LP*( 1) B 14        | 0.70  | 0.75 |
| 0.033 | 20. BD ( 1) N 9 - C 10 | /269. RY*( 2) C 4         | 0.90  | 1.47 |
| 0.031 | 20. BD ( 1) N 9 - C 10 | /396. RY*( 3) C 13        | 0.66  | 1.78 |
| 0.023 | 20. BD ( 1) N 9 - C 10 | /***. BD*( 1) C 3 - C 4   | 0.56  | 1.18 |
| 0.026 | 20. BD ( 1) N 9 - C 10 | /***. BD*( 1) C 4 - C 5   | 0.72  | 1.18 |
| 0.026 | 20. BD ( 1) N 9 - C 10 | /***. BD*( 2) C 4 - C 5   | 0.96  | 0.73 |
| 0.028 | 20. BD ( 1) N 9 - C 10 | /***. BD*( 1) C 4 - N 9   | 0.94  | 1.03 |
| 0.028 | 20. BD ( 1) N 9 - C 10 | /***. BD*( 1) N 9 - C 13  | 0.90  | 1.06 |
| 0.040 | 20. BD ( 1) N 9 - C 10 | /***. BD*( 1) C 10 - B 14 | 1.74  | 1.16 |
| 0.063 | 20. BD ( 1) N 9 - C 10 | /***. BD*( 1) N 11 - C 41 | 4.89  | 1.03 |
| 0.045 | 20. BD ( 1) N 9 - C 10 | /***. BD*( 1) C 13 - H 72 | 2.42  | 1.06 |
| 0.031 | 20. BD ( 1) N 9 - C 10 | /***. BD*( 1) B 14 - B 15 | 1.01  | 1.20 |
| 0.035 | 21. BD ( 2) N 9 - C 10 | /270. RY*( 3) C 4         | 1.02  | 1.43 |
| 0.042 | 21. BD ( 2) N 9 - C 10 | /394. RY*( 1) C 13        | 2.14  | 0.95 |
| 0.027 | 21. BD ( 2) N 9 - C 10 | /***. BD*( 1) C 1 - B 14  | 1.43  | 0.62 |
| 0.050 | 21. BD ( 2) N 9 - C 10 | /***. BD*( 1) C 3 - C 4   | 4.06  | 0.75 |
| 0.051 | 21. BD ( 2) N 9 - C 10 | /***. BD*( 1) C 4 - C 5   | 4.08  | 0.75 |
| 0.061 | 21. BD ( 2) N 9 - C 10 | /***. BD*( 2) C 12 - C 13 | 15.90 | 0.27 |
| 0.018 | 21. BD ( 2) N 9 - C 10 | /***. BD*( 1) B 14 - B 15 | 0.53  | 0.77 |
| 0.029 | 22. BD ( 1) N 9 - C 13 | /269. RY*( 2) C 4         | 0.69  | 1.47 |

|       |                         |                           |      |      |
|-------|-------------------------|---------------------------|------|------|
| 0.035 | 22. BD ( 1) N 9 - C 13  | /352. RY*( 1) C 10        | 0.64 | 2.36 |
| 0.036 | 22. BD ( 1) N 9 - C 13  | /354. RY*( 3) C 10        | 0.66 | 2.40 |
| 0.031 | 22. BD ( 1) N 9 - C 13  | /355. RY*( 4) C 10        | 0.51 | 2.31 |
| 0.035 | 22. BD ( 1) N 9 - C 13  | /382. RY*( 3) C 12        | 0.87 | 1.79 |
| 0.030 | 22. BD ( 1) N 9 - C 13  | /***. BD*( 1) C 3 - C 4   | 0.95 | 1.18 |
| 0.029 | 22. BD ( 1) N 9 - C 13  | /***. BD*( 2) C 4 - C 5   | 1.18 | 0.73 |
| 0.026 | 22. BD ( 1) N 9 - C 13  | /***. BD*( 1) C 4 - N 9   | 0.82 | 1.03 |
| 0.027 | 22. BD ( 1) N 9 - C 13  | /***. BD*( 1) N 9 - C 10  | 0.84 | 1.07 |
| 0.023 | 22. BD ( 1) N 9 - C 13  | /***. BD*( 1) C 10 - N 11 | 0.63 | 1.07 |
| 0.051 | 22. BD ( 1) N 9 - C 13  | /***. BD*( 1) C 10 - B 14 | 2.77 | 1.16 |
| 0.024 | 22. BD ( 1) N 9 - C 13  | /***. BD*( 1) N 11 - C 41 | 0.67 | 1.03 |
| 0.026 | 22. BD ( 1) N 9 - C 13  | /***. BD*( 1) C 12 - C 13 | 0.67 | 1.22 |
| 0.056 | 22. BD ( 1) N 9 - C 13  | /***. BD*( 1) C 12 - H 71 | 3.70 | 1.06 |
| 0.030 | 23. BD ( 1) C 10 - N 11 | /382. RY*( 3) C 12        | 0.63 | 1.79 |
| 0.032 | 23. BD ( 1) C 10 - N 11 | /787. RY*( 2) C 41        | 0.83 | 1.51 |
| 0.062 | 23. BD ( 1) C 10 - N 11 | /***. BD*( 1) C 4 - N 9   | 4.72 | 1.03 |
| 0.040 | 23. BD ( 1) C 10 - N 11 | /***. BD*( 1) C 10 - B 14 | 1.75 | 1.16 |
| 0.028 | 23. BD ( 1) C 10 - N 11 | /***. BD*( 1) N 11 - C 12 | 0.92 | 1.06 |
| 0.028 | 23. BD ( 1) C 10 - N 11 | /***. BD*( 1) N 11 - C 41 | 0.94 | 1.03 |
| 0.045 | 23. BD ( 1) C 10 - N 11 | /***. BD*( 1) C 12 - H 71 | 2.37 | 1.06 |
| 0.028 | 23. BD ( 1) C 10 - N 11 | /***. BD*( 1) B 14 - B 15 | 0.83 | 1.21 |
| 0.028 | 23. BD ( 1) C 10 - N 11 | /***. BD*( 1) C 41 - C 46 | 0.70 | 1.36 |
| 0.023 | 23. BD ( 1) C 10 - N 11 | /***. BD*( 2) C 41 - C 46 | 0.76 | 0.75 |
| 0.026 | 24. BD ( 1) C 10 - B 14 | /338. RY*( 1) N 9         | 0.63 | 1.37 |
| 0.036 | 24. BD ( 1) C 10 - B 14 | /339. RY*( 2) N 9         | 0.84 | 1.91 |
| 0.023 | 24. BD ( 1) C 10 - B 14 | /366. RY*( 1) N 11        | 0.51 | 1.32 |
| 0.042 | 24. BD ( 1) C 10 - B 14 | /367. RY*( 2) N 11        | 1.13 | 1.95 |
| 0.028 | 24. BD ( 1) C 10 - B 14 | /411. RY*( 4) B 14        | 0.56 | 1.73 |
| 0.056 | 24. BD ( 1) C 10 - B 14 | /413. RY*( 6) B 14        | 0.96 | 3.97 |
| 0.039 | 24. BD ( 1) C 10 - B 14 | /414. RY*( 7) B 14        | 0.62 | 3.05 |
| 0.068 | 24. BD ( 1) C 10 - B 14 | /416. RY*( 9) B 14        | 1.14 | 4.98 |
| 0.046 | 24. BD ( 1) C 10 - B 14 | /419. RY*( 12) B 14       | 0.55 | 4.69 |
| 0.072 | 24. BD ( 1) C 10 - B 14 | /422. RY*( 1) B 15        | 2.95 | 2.14 |
| 0.026 | 24. BD ( 1) C 10 - B 14 | /***. BD*( 1) C 1 - B 14  | 0.93 | 0.85 |
| 0.033 | 24. BD ( 1) C 10 - B 14 | /***. BD*( 1) C 1 - B 15  | 1.42 | 0.96 |

|       |                         |                           |      |      |
|-------|-------------------------|---------------------------|------|------|
| 0.033 | 24. BD ( 1) C 10 - B 14 | /***. BD*( 1) N 9 - C 10  | 1.57 | 0.86 |
| 0.049 | 24. BD ( 1) C 10 - B 14 | /***. BD*( 1) N 9 - C 13  | 3.46 | 0.86 |
| 0.032 | 24. BD ( 1) C 10 - B 14 | /***. BD*( 1) C 10 - N 11 | 1.51 | 0.86 |
| 0.048 | 24. BD ( 1) C 10 - B 14 | /***. BD*( 1) N 11 - C 12 | 3.34 | 0.85 |
| 0.050 | 24. BD ( 1) C 10 - B 14 | /***. BD*( 1) B 14 - B 15 | 3.14 | 1.00 |
| 0.027 | 24. BD ( 1) C 10 - B 14 | /***. BD*( 1) B 15 - C 16 | 0.95 | 0.92 |
| 0.038 | 25. BD ( 1) N 11 - C 12 | /352. RY*( 1) C 10        | 0.75 | 2.36 |
| 0.042 | 25. BD ( 1) N 11 - C 12 | /354. RY*( 3) C 10        | 0.91 | 2.39 |
| 0.035 | 25. BD ( 1) N 11 - C 12 | /396. RY*( 3) C 13        | 0.86 | 1.78 |
| 0.028 | 25. BD ( 1) N 11 - C 12 | /787. RY*( 2) C 41        | 0.67 | 1.50 |
| 0.024 | 25. BD ( 1) N 11 - C 12 | /***. BD*( 1) C 4 - N 9   | 0.69 | 1.03 |
| 0.024 | 25. BD ( 1) N 11 - C 12 | /***. BD*( 1) N 9 - C 10  | 0.67 | 1.07 |
| 0.027 | 25. BD ( 1) N 11 - C 12 | /***. BD*( 1) C 10 - N 11 | 0.86 | 1.06 |
| 0.053 | 25. BD ( 1) N 11 - C 12 | /***. BD*( 1) C 10 - B 14 | 2.99 | 1.16 |
| 0.026 | 25. BD ( 1) N 11 - C 12 | /***. BD*( 1) N 11 - C 41 | 0.84 | 1.02 |
| 0.026 | 25. BD ( 1) N 11 - C 12 | /***. BD*( 1) C 12 - C 13 | 0.67 | 1.22 |
| 0.056 | 25. BD ( 1) N 11 - C 12 | /***. BD*( 1) C 13 - H 72 | 3.68 | 1.05 |
| 0.031 | 25. BD ( 1) N 11 - C 12 | /***. BD*( 1) C 41 - C 42 | 0.90 | 1.35 |
| 0.031 | 25. BD ( 1) N 11 - C 12 | /***. BD*( 2) C 41 - C 46 | 1.34 | 0.74 |
| 0.039 | 26. BD ( 1) N 11 - C 41 | /352. RY*( 1) C 10        | 0.82 | 2.35 |
| 0.033 | 26. BD ( 1) N 11 - C 41 | /381. RY*( 2) C 12        | 0.65 | 2.04 |
| 0.034 | 26. BD ( 1) N 11 - C 41 | /799. RY*( 1) C 42        | 0.70 | 2.08 |
| 0.032 | 26. BD ( 1) N 11 - C 41 | /855. RY*( 1) C 46        | 0.61 | 2.10 |
| 0.033 | 26. BD ( 1) N 11 - C 41 | /***. BD*( 1) N 9 - C 10  | 1.27 | 1.06 |
| 0.027 | 26. BD ( 1) N 11 - C 41 | /***. BD*( 1) C 10 - N 11 | 0.89 | 1.06 |
| 0.022 | 26. BD ( 1) N 11 - C 41 | /***. BD*( 1) N 11 - C 12 | 0.56 | 1.05 |
| 0.034 | 26. BD ( 1) N 11 - C 41 | /***. BD*( 2) N 11 - C 41 | 0.67 | 1.70 |
| 0.030 | 26. BD ( 1) N 11 - C 41 | /***. BD*( 1) C 12 - C 13 | 0.91 | 1.21 |
| 0.027 | 26. BD ( 1) N 11 - C 41 | /***. BD*( 1) C 41 - C 46 | 0.67 | 1.35 |
| 0.048 | 26. BD ( 1) N 11 - C 41 | /***. BD*( 1) C 42 - C 43 | 2.42 | 1.19 |
| 0.046 | 26. BD ( 1) N 11 - C 41 | /***. BD*( 1) C 45 - C 46 | 2.26 | 1.18 |
| 0.049 | 27. BD ( 2) N 11 - C 41 | /358. RY*( 7) C 10        | 1.13 | 2.14 |
| 0.051 | 27. BD ( 2) N 11 - C 41 | /380. RY*( 1) C 12        | 2.89 | 0.90 |
| 0.035 | 27. BD ( 2) N 11 - C 41 | /788. RY*( 3) C 41        | 0.73 | 1.70 |
| 0.043 | 27. BD ( 2) N 11 - C 41 | /794. RY*( 9) C 41        | 0.94 | 2.03 |

|       |                         |                           |       |      |
|-------|-------------------------|---------------------------|-------|------|
| 0.088 | 27. BD ( 2) N 11 - C 41 | /***. BD*( 2) N 9 - C 10  | 43.76 | 0.18 |
| 0.055 | 27. BD ( 2) N 11 - C 41 | /***. BD*( 2) N 11 - C 41 | 2.99  | 1.23 |
| 0.069 | 27. BD ( 2) N 11 - C 41 | /***. BD*( 2) C 12 - C 13 | 26.04 | 0.22 |
| 0.080 | 27. BD ( 2) N 11 - C 41 | /***. BD*( 1) C 41 - C 42 | 7.56  | 0.87 |
| 0.081 | 27. BD ( 2) N 11 - C 41 | /***. BD*( 1) C 41 - C 46 | 7.71  | 0.87 |
| 0.018 | 27. BD ( 2) N 11 - C 41 | /***. BD*( 2) C 41 - C 46 | 1.66  | 0.26 |
| 0.021 | 27. BD ( 2) N 11 - C 41 | /***. BD*( 1) C 42 - C 43 | 0.65  | 0.71 |
| 0.021 | 27. BD ( 2) N 11 - C 41 | /***. BD*( 1) C 45 - C 46 | 0.66  | 0.70 |
| 0.046 | 28. BD ( 1) C 12 - C 13 | /339. RY*( 2) N 9         | 1.28  | 2.06 |
| 0.047 | 28. BD ( 1) C 12 - C 13 | /367. RY*( 2) N 11        | 1.33  | 2.11 |
| 0.063 | 28. BD ( 1) C 12 - C 13 | /***. BD*( 1) C 4 - N 9   | 5.06  | 0.98 |
| 0.062 | 28. BD ( 1) C 12 - C 13 | /***. BD*( 1) N 11 - C 41 | 4.94  | 0.98 |
| 0.028 | 28. BD ( 1) C 12 - C 13 | /***. BD*( 1) C 12 - H 71 | 0.98  | 1.00 |
| 0.028 | 28. BD ( 1) C 12 - C 13 | /***. BD*( 1) C 13 - H 72 | 0.99  | 1.00 |
| 0.039 | 29. BD ( 2) C 12 - C 13 | /***. BD*( 2) N 9 - C 10  | 6.33  | 0.20 |
| 0.043 | 30. BD ( 1) C 12 - H 71 | /367. RY*( 2) N 11        | 1.20  | 1.94 |
| 0.038 | 30. BD ( 1) C 12 - H 71 | /395. RY*( 2) C 13        | 0.98  | 1.83 |
| 0.037 | 30. BD ( 1) C 12 - H 71 | /***. BD*( 1) N 9 - C 13  | 2.04  | 0.84 |
| 0.052 | 30. BD ( 1) C 12 - H 71 | /***. BD*( 1) C 10 - N 11 | 3.90  | 0.85 |
| 0.026 | 30. BD ( 1) C 12 - H 71 | /***. BD*( 1) C 12 - C 13 | 0.83  | 1.00 |
| 0.041 | 31. BD ( 1) C 13 - H 72 | /339. RY*( 2) N 9         | 1.12  | 1.89 |
| 0.039 | 31. BD ( 1) C 13 - H 72 | /381. RY*( 2) C 12        | 1.01  | 1.84 |
| 0.052 | 31. BD ( 1) C 13 - H 72 | /***. BD*( 1) N 9 - C 10  | 3.91  | 0.85 |
| 0.037 | 31. BD ( 1) C 13 - H 72 | /***. BD*( 1) N 11 - C 12 | 2.06  | 0.84 |
| 0.026 | 31. BD ( 1) C 13 - H 72 | /***. BD*( 1) C 12 - C 13 | 0.84  | 1.00 |
| 0.030 | 32. BD ( 1) B 14 - B 15 | /226. RY*( 1) C 1         | 0.81  | 1.30 |
| 0.060 | 32. BD ( 1) B 14 - B 15 | /352. RY*( 1) C 10        | 2.17  | 1.93 |
| 0.043 | 32. BD ( 1) B 14 - B 15 | /355. RY*( 4) C 10        | 1.11  | 1.88 |
| 0.030 | 32. BD ( 1) B 14 - B 15 | /356. RY*( 5) C 10        | 0.74  | 1.36 |
| 0.050 | 32. BD ( 1) B 14 - B 15 | /408. RY*( 1) B 14        | 1.57  | 1.80 |
| 0.026 | 32. BD ( 1) B 14 - B 15 | /411. RY*( 4) B 14        | 0.52  | 1.50 |
| 0.051 | 32. BD ( 1) B 14 - B 15 | /419. RY*( 12) B 14       | 0.66  | 4.47 |
| 0.030 | 32. BD ( 1) B 14 - B 15 | /422. RY*( 1) B 15        | 0.54  | 1.92 |
| 0.044 | 32. BD ( 1) B 14 - B 15 | /432. RY*( 11) B 15       | 0.66  | 3.34 |
| 0.059 | 32. BD ( 1) B 14 - B 15 | /436. RY*( 1) C 16        | 1.89  | 2.11 |

|       |                         |                           |       |      |
|-------|-------------------------|---------------------------|-------|------|
| 0.028 | 32. BD ( 1) B 14 - B 15 | /438. RY*( 3) C 16        | 0.51  | 1.74 |
| 0.125 | 32. BD ( 1) B 14 - B 15 | /***. BD*( 1) C 1 - O 2   | 22.95 | 0.80 |
| 0.038 | 32. BD ( 1) B 14 - B 15 | /***. BD*( 1) C 1 - B 14  | 2.81  | 0.62 |
| 0.040 | 32. BD ( 1) B 14 - B 15 | /***. BD*( 1) C 1 - B 15  | 2.60  | 0.74 |
| 0.024 | 32. BD ( 1) B 14 - B 15 | /***. BD*( 1) N 9 - C 10  | 1.02  | 0.64 |
| 0.016 | 32. BD ( 1) B 14 - B 15 | /***. BD*( 2) N 9 - C 10  | 0.98  | 0.24 |
| 0.027 | 32. BD ( 1) B 14 - B 15 | /***. BD*( 1) C 10 - N 11 | 1.40  | 0.64 |
| 0.034 | 32. BD ( 1) B 14 - B 15 | /***. BD*( 1) C 10 - B 14 | 1.88  | 0.73 |
| 0.047 | 32. BD ( 1) B 14 - B 15 | /***. BD*( 1) B 15 - C 16 | 3.67  | 0.70 |
| 0.047 | 32. BD ( 1) B 14 - B 15 | /***. BD*( 1) C 16 - N 17 | 3.97  | 0.64 |
| 0.065 | 33. BD ( 1) B 15 - C 16 | /408. RY*( 1) B 14        | 2.55  | 2.03 |
| 0.083 | 33. BD ( 1) B 15 - C 16 | /430. RY*( 9) B 15        | 1.21  | 6.96 |
| 0.052 | 33. BD ( 1) B 15 - C 16 | /433. RY*( 12) B 15       | 0.74  | 4.49 |
| 0.036 | 33. BD ( 1) B 15 - C 16 | /436. RY*( 1) C 16        | 0.70  | 2.33 |
| 0.050 | 33. BD ( 1) B 15 - C 16 | /450. RY*( 1) N 17        | 1.55  | 1.99 |
| 0.026 | 33. BD ( 1) B 15 - C 16 | /452. RY*( 3) N 17        | 0.56  | 1.46 |
| 0.048 | 33. BD ( 1) B 15 - C 16 | /492. RY*( 1) N 20        | 1.50  | 1.90 |
| 0.036 | 33. BD ( 1) B 15 - C 16 | /***. BD*( 1) C 1 - O 2   | 1.60  | 1.02 |
| 0.031 | 33. BD ( 1) B 15 - C 16 | /***. BD*( 1) C 1 - B 14  | 1.35  | 0.84 |
| 0.044 | 33. BD ( 1) B 15 - C 16 | /***. BD*( 1) C 1 - B 15  | 2.45  | 0.96 |
| 0.036 | 33. BD ( 1) B 15 - C 16 | /***. BD*( 1) C 10 - B 14 | 1.75  | 0.95 |
| 0.062 | 33. BD ( 1) B 15 - C 16 | /***. BD*( 1) B 14 - B 15 | 4.92  | 0.99 |
| 0.031 | 33. BD ( 1) B 15 - C 16 | /***. BD*( 1) C 16 - N 17 | 1.35  | 0.86 |
| 0.031 | 33. BD ( 1) B 15 - C 16 | /***. BD*( 1) C 16 - N 20 | 1.36  | 0.86 |
| 0.050 | 33. BD ( 1) B 15 - C 16 | /***. BD*( 1) N 17 - C 18 | 3.77  | 0.84 |
| 0.049 | 33. BD ( 1) B 15 - C 16 | /***. BD*( 1) C 19 - N 20 | 3.63  | 0.84 |
| 0.032 | 34. BD ( 1) C 16 - N 17 | /466. RY*( 3) C 18        | 0.68  | 1.86 |
| 0.033 | 34. BD ( 1) C 16 - N 17 | /492. RY*( 1) N 20        | 0.64  | 2.14 |
| 0.030 | 34. BD ( 1) C 16 - N 17 | /507. RY*( 2) C 21        | 0.76  | 1.50 |
| 0.030 | 34. BD ( 1) C 16 - N 17 | /***. BD*( 1) B 14 - B 15 | 0.92  | 1.23 |
| 0.040 | 34. BD ( 1) C 16 - N 17 | /***. BD*( 1) B 15 - C 16 | 1.68  | 1.16 |
| 0.031 | 34. BD ( 1) C 16 - N 17 | /***. BD*( 1) N 17 - C 18 | 1.08  | 1.08 |
| 0.030 | 34. BD ( 1) C 16 - N 17 | /***. BD*( 1) N 17 - C 21 | 1.05  | 1.04 |
| 0.046 | 34. BD ( 1) C 16 - N 17 | /***. BD*( 1) C 18 - H 63 | 2.43  | 1.07 |
| 0.065 | 34. BD ( 1) C 16 - N 17 | /***. BD*( 1) N 20 - C 31 | 5.14  | 1.04 |

|       |                         |                           |       |      |
|-------|-------------------------|---------------------------|-------|------|
| 0.023 | 34. BD ( 1) C 16 - N 17 | /***. BD*( 1) C 21 - C 22 | 0.56  | 1.20 |
| 0.026 | 34. BD ( 1) C 16 - N 17 | /***. BD*( 1) C 21 - C 26 | 0.71  | 1.20 |
| 0.023 | 34. BD ( 1) C 16 - N 17 | /***. BD*( 2) C 21 - C 26 | 0.73  | 0.75 |
| 0.039 | 35. BD ( 2) C 16 - N 17 | /224. LP ( 1) B 15        | 3.98  | 0.34 |
| 0.041 | 35. BD ( 2) C 16 - N 17 | /464. RY*( 1) C 18        | 2.06  | 0.93 |
| 0.035 | 35. BD ( 2) C 16 - N 17 | /508. RY*( 3) C 21        | 1.11  | 1.29 |
| 0.062 | 35. BD ( 2) C 16 - N 17 | /***. BD*( 2) C 18 - C 19 | 16.05 | 0.28 |
| 0.049 | 35. BD ( 2) C 16 - N 17 | /***. BD*( 1) C 21 - C 22 | 3.67  | 0.77 |
| 0.048 | 35. BD ( 2) C 16 - N 17 | /***. BD*( 1) C 21 - C 26 | 3.63  | 0.77 |
| 0.034 | 36. BD ( 1) C 16 - N 20 | /450. RY*( 1) N 17        | 0.63  | 2.23 |
| 0.032 | 36. BD ( 1) C 16 - N 20 | /480. RY*( 3) C 19        | 0.68  | 1.84 |
| 0.033 | 36. BD ( 1) C 16 - N 20 | /647. RY*( 2) C 31        | 0.92  | 1.49 |
| 0.039 | 36. BD ( 1) C 16 - N 20 | /***. BD*( 1) B 15 - C 16 | 1.63  | 1.16 |
| 0.065 | 36. BD ( 1) C 16 - N 20 | /***. BD*( 1) N 17 - C 21 | 5.05  | 1.04 |
| 0.031 | 36. BD ( 1) C 16 - N 20 | /***. BD*( 1) C 19 - N 20 | 1.10  | 1.08 |
| 0.045 | 36. BD ( 1) C 16 - N 20 | /***. BD*( 1) C 19 - H 64 | 2.33  | 1.07 |
| 0.030 | 36. BD ( 1) C 16 - N 20 | /***. BD*( 1) N 20 - C 31 | 1.08  | 1.04 |
| 0.026 | 36. BD ( 1) C 16 - N 20 | /***. BD*( 1) C 31 - C 32 | 0.68  | 1.20 |
| 0.023 | 36. BD ( 1) C 16 - N 20 | /***. BD*( 1) C 31 - C 36 | 0.56  | 1.20 |
| 0.024 | 36. BD ( 1) C 16 - N 20 | /***. BD*( 2) C 31 - C 36 | 0.80  | 0.75 |
| 0.041 | 37. BD ( 1) N 17 - C 18 | /436. RY*( 1) C 16        | 0.83  | 2.56 |
| 0.051 | 37. BD ( 1) N 17 - C 18 | /439. RY*( 4) C 16        | 1.41  | 2.26 |
| 0.035 | 37. BD ( 1) N 17 - C 18 | /480. RY*( 3) C 19        | 0.82  | 1.83 |
| 0.028 | 37. BD ( 1) N 17 - C 18 | /507. RY*( 2) C 21        | 0.65  | 1.50 |
| 0.052 | 37. BD ( 1) N 17 - C 18 | /***. BD*( 1) B 15 - C 16 | 2.90  | 1.15 |
| 0.029 | 37. BD ( 1) N 17 - C 18 | /***. BD*( 1) C 16 - N 17 | 0.94  | 1.10 |
| 0.024 | 37. BD ( 1) N 17 - C 18 | /***. BD*( 1) C 16 - N 20 | 0.64  | 1.10 |
| 0.027 | 37. BD ( 1) N 17 - C 18 | /***. BD*( 1) N 17 - C 21 | 0.85  | 1.03 |
| 0.025 | 37. BD ( 1) N 17 - C 18 | /***. BD*( 1) C 18 - C 19 | 0.62  | 1.22 |
| 0.055 | 37. BD ( 1) N 17 - C 18 | /***. BD*( 1) C 19 - H 64 | 3.51  | 1.06 |
| 0.025 | 37. BD ( 1) N 17 - C 18 | /***. BD*( 1) N 20 - C 31 | 0.73  | 1.03 |
| 0.028 | 37. BD ( 1) N 17 - C 18 | /***. BD*( 1) C 21 - C 22 | 0.84  | 1.20 |
| 0.030 | 37. BD ( 1) N 17 - C 18 | /***. BD*( 2) C 21 - C 26 | 1.19  | 0.75 |
| 0.046 | 38. BD ( 1) N 17 - C 21 | /436. RY*( 1) C 16        | 1.04  | 2.54 |
| 0.032 | 38. BD ( 1) N 17 - C 21 | /465. RY*( 2) C 18        | 0.64  | 2.05 |



|       |                         |                           |      |      |
|-------|-------------------------|---------------------------|------|------|
| 0.032 | 38. BD ( 1) N 17 - C 21 | /520. RY*( 1) C 22        | 0.64 | 2.01 |
| 0.031 | 38. BD ( 1) N 17 - C 21 | /576. RY*( 1) C 26        | 0.56 | 2.12 |
| 0.030 | 38. BD ( 1) N 17 - C 21 | /***. BD*( 1) C 16 - N 17 | 1.04 | 1.07 |
| 0.036 | 38. BD ( 1) N 17 - C 21 | /***. BD*( 1) C 16 - N 20 | 1.51 | 1.07 |
| 0.022 | 38. BD ( 1) N 17 - C 21 | /***. BD*( 1) N 17 - C 18 | 0.59 | 1.05 |
| 0.030 | 38. BD ( 1) N 17 - C 21 | /***. BD*( 1) C 18 - C 19 | 0.92 | 1.19 |
| 0.022 | 38. BD ( 1) N 17 - C 21 | /***. BD*( 1) C 21 - C 22 | 0.54 | 1.17 |
| 0.047 | 38. BD ( 1) N 17 - C 21 | /***. BD*( 1) C 22 - C 23 | 2.32 | 1.20 |
| 0.047 | 38. BD ( 1) N 17 - C 21 | /***. BD*( 1) C 25 - C 26 | 2.29 | 1.19 |
| 0.047 | 39. BD ( 1) C 18 - C 19 | /450. RY*( 1) N 17        | 1.26 | 2.16 |
| 0.043 | 39. BD ( 1) C 18 - C 19 | /492. RY*( 1) N 20        | 1.09 | 2.07 |
| 0.064 | 39. BD ( 1) C 18 - C 19 | /***. BD*( 1) N 17 - C 21 | 5.20 | 0.97 |
| 0.027 | 39. BD ( 1) C 18 - C 19 | /***. BD*( 1) C 18 - H 63 | 0.88 | 1.00 |
| 0.027 | 39. BD ( 1) C 18 - C 19 | /***. BD*( 1) C 19 - H 64 | 0.90 | 1.00 |
| 0.063 | 39. BD ( 1) C 18 - C 19 | /***. BD*( 1) N 20 - C 31 | 5.10 | 0.97 |
| 0.041 | 40. BD ( 2) C 18 - C 19 | /***. BD*( 2) C 16 - N 17 | 7.87 | 0.21 |
| 0.044 | 41. BD ( 1) C 18 - H 63 | /450. RY*( 1) N 17        | 1.19 | 1.99 |
| 0.038 | 41. BD ( 1) C 18 - H 63 | /479. RY*( 2) C 19        | 0.98 | 1.80 |
| 0.053 | 41. BD ( 1) C 18 - H 63 | /***. BD*( 1) C 16 - N 17 | 4.06 | 0.87 |
| 0.024 | 41. BD ( 1) C 18 - H 63 | /***. BD*( 1) C 18 - C 19 | 0.71 | 0.99 |
| 0.036 | 41. BD ( 1) C 18 - H 63 | /***. BD*( 1) C 19 - N 20 | 1.88 | 0.84 |
| 0.042 | 42. BD ( 1) C 19 - N 20 | /436. RY*( 1) C 16        | 0.85 | 2.56 |
| 0.037 | 42. BD ( 1) C 19 - N 20 | /438. RY*( 3) C 16        | 0.78 | 2.19 |
| 0.035 | 42. BD ( 1) C 19 - N 20 | /466. RY*( 3) C 18        | 0.80 | 1.85 |
| 0.028 | 42. BD ( 1) C 19 - N 20 | /647. RY*( 2) C 31        | 0.67 | 1.48 |
| 0.053 | 42. BD ( 1) C 19 - N 20 | /***. BD*( 1) B 15 - C 16 | 2.97 | 1.15 |
| 0.024 | 42. BD ( 1) C 19 - N 20 | /***. BD*( 1) C 16 - N 17 | 0.65 | 1.10 |
| 0.029 | 42. BD ( 1) C 19 - N 20 | /***. BD*( 1) C 16 - N 20 | 0.96 | 1.10 |
| 0.025 | 42. BD ( 1) C 19 - N 20 | /***. BD*( 1) N 17 - C 21 | 0.73 | 1.03 |
| 0.024 | 42. BD ( 1) C 19 - N 20 | /***. BD*( 1) C 18 - C 19 | 0.60 | 1.22 |
| 0.055 | 42. BD ( 1) C 19 - N 20 | /***. BD*( 1) C 18 - H 63 | 3.54 | 1.06 |
| 0.026 | 42. BD ( 1) C 19 - N 20 | /***. BD*( 1) N 20 - C 31 | 0.82 | 1.03 |
| 0.028 | 42. BD ( 1) C 19 - N 20 | /***. BD*( 1) C 31 - C 36 | 0.80 | 1.19 |
| 0.030 | 42. BD ( 1) C 19 - N 20 | /***. BD*( 2) C 31 - C 36 | 1.25 | 0.74 |
| 0.038 | 43. BD ( 1) C 19 - H 64 | /465. RY*( 2) C 18        | 0.99 | 1.85 |

|                         |                           |      |      |
|-------------------------|---------------------------|------|------|
| 43. BD ( 1) C 19 - H 64 | /492. RY*( 1) N 20        | 1.09 | 1.90 |
| 0.041                   |                           |      |      |
| 43. BD ( 1) C 19 - H 64 | /***. BD*( 1) C 16 - N 20 | 4.07 | 0.87 |
| 0.053                   |                           |      |      |
| 43. BD ( 1) C 19 - H 64 | /***. BD*( 1) N 17 - C 18 | 1.91 | 0.85 |
| 0.036                   |                           |      |      |
| 43. BD ( 1) C 19 - H 64 | /***. BD*( 1) C 18 - C 19 | 0.73 | 0.99 |
| 0.024                   |                           |      |      |
| 44. BD ( 1) N 20 - C 31 | /436. RY*( 1) C 16        | 0.96 | 2.55 |
| 0.044                   |                           |      |      |
| 44. BD ( 1) N 20 - C 31 | /479. RY*( 2) C 19        | 0.63 | 2.01 |
| 0.032                   |                           |      |      |
| 44. BD ( 1) N 20 - C 31 | /660. RY*( 1) C 32        | 0.56 | 2.13 |
| 0.031                   |                           |      |      |
| 44. BD ( 1) N 20 - C 31 | /716. RY*( 1) C 36        | 0.59 | 2.11 |
| 0.032                   |                           |      |      |
| 44. BD ( 1) N 20 - C 31 | /***. BD*( 1) C 16 - N 17 | 1.44 | 1.08 |
| 0.035                   |                           |      |      |
| 44. BD ( 1) N 20 - C 31 | /***. BD*( 1) C 16 - N 20 | 1.04 | 1.08 |
| 0.030                   |                           |      |      |
| 44. BD ( 1) N 20 - C 31 | /***. BD*( 1) C 18 - C 19 | 0.87 | 1.20 |
| 0.029                   |                           |      |      |
| 44. BD ( 1) N 20 - C 31 | /***. BD*( 1) C 19 - N 20 | 0.57 | 1.05 |
| 0.022                   |                           |      |      |
| 44. BD ( 1) N 20 - C 31 | /***. BD*( 1) C 31 - C 32 | 0.51 | 1.17 |
| 0.022                   |                           |      |      |
| 44. BD ( 1) N 20 - C 31 | /***. BD*( 1) C 31 - C 36 | 0.56 | 1.18 |
| 0.023                   |                           |      |      |
| 44. BD ( 1) N 20 - C 31 | /***. BD*( 1) C 32 - C 33 | 2.23 | 1.19 |
| 0.046                   |                           |      |      |
| 44. BD ( 1) N 20 - C 31 | /***. BD*( 1) C 35 - C 36 | 2.31 | 1.19 |
| 0.047                   |                           |      |      |
| 45. BD ( 1) C 21 - C 22 | /451. RY*( 2) N 17        | 0.69 | 1.38 |
| 0.028                   |                           |      |      |
| 45. BD ( 1) C 21 - C 22 | /578. RY*( 3) C 26        | 0.71 | 1.69 |
| 0.031                   |                           |      |      |
| 45. BD ( 1) C 21 - C 22 | /***. BD*( 1) C 16 - N 17 | 1.41 | 0.98 |
| 0.033                   |                           |      |      |
| 45. BD ( 1) C 21 - C 22 | /***. BD*( 2) C 16 - N 17 | 0.66 | 0.57 |
| 0.021                   |                           |      |      |
| 45. BD ( 1) C 21 - C 22 | /***. BD*( 1) N 17 - C 18 | 1.14 | 0.97 |
| 0.030                   |                           |      |      |
| 45. BD ( 1) C 21 - C 22 | /***. BD*( 1) C 21 - C 26 | 2.47 | 1.09 |
| 0.046                   |                           |      |      |
| 45. BD ( 1) C 21 - C 22 | /***. BD*( 1) C 22 - C 23 | 1.25 | 1.11 |
| 0.033                   |                           |      |      |
| 45. BD ( 1) C 21 - C 22 | /***. BD*( 1) C 22 - C 27 | 0.59 | 0.96 |
| 0.021                   |                           |      |      |
| 45. BD ( 1) C 21 - C 22 | /***. BD*( 1) C 23 - H 67 | 2.86 | 0.99 |
| 0.048                   |                           |      |      |
| 45. BD ( 1) C 21 - C 22 | /***. BD*( 1) C 26 - C 29 | 3.76 | 0.95 |
| 0.053                   |                           |      |      |
| 45. BD ( 1) C 21 - C 22 | /***. BD*( 1) C 27 - C 62 | 1.13 | 0.93 |
| 0.029                   |                           |      |      |
| 46. BD ( 1) C 21 - C 26 | /451. RY*( 2) N 17        | 0.89 | 1.38 |
| 0.031                   |                           |      |      |
| 46. BD ( 1) C 21 - C 26 | /522. RY*( 3) C 22        | 0.79 | 1.60 |
| 0.032                   |                           |      |      |
| 46. BD ( 1) C 21 - C 26 | /***. BD*( 1) C 16 - N 17 | 1.69 | 0.99 |
| 0.037                   |                           |      |      |
| 46. BD ( 1) C 21 - C 26 | /***. BD*( 2) C 16 - N 17 | 0.86 | 0.58 |
| 0.024                   |                           |      |      |
| 46. BD ( 1) C 21 - C 26 | /***. BD*( 1) N 17 - C 18 | 0.74 | 0.97 |
| 0.024                   |                           |      |      |
| 46. BD ( 1) C 21 - C 26 | /***. BD*( 1) C 21 - C 22 | 2.48 | 1.09 |
| 0.046                   |                           |      |      |
| 46. BD ( 1) C 21 - C 26 | /***. BD*( 1) C 22 - C 27 | 3.62 | 0.97 |
| 0.053                   |                           |      |      |
| 46. BD ( 1) C 21 - C 26 | /***. BD*( 1) C 25 - C 26 | 1.41 | 1.10 |
| 0.035                   |                           |      |      |

|       |                         |                           |       |      |
|-------|-------------------------|---------------------------|-------|------|
| 0.047 | 46. BD ( 1) C 21 - C 26 | /***. BD*( 1) C 25 - H 65 | 2.85  | 0.98 |
| 0.022 | 46. BD ( 1) C 21 - C 26 | /***. BD*( 1) C 26 - C 29 | 0.63  | 0.96 |
| 0.021 | 46. BD ( 1) C 21 - C 26 | /***. BD*( 1) C 29 - C 30 | 0.60  | 0.92 |
| 0.021 | 46. BD ( 1) C 21 - C 26 | /***. BD*( 1) C 29 - C 61 | 0.59  | 0.92 |
| 0.021 | 47. BD ( 2) C 21 - C 26 | /521. RY*( 2) C 22        | 0.53  | 0.91 |
| 0.032 | 47. BD ( 2) C 21 - C 26 | /564. RY*( 3) C 25        | 1.37  | 0.80 |
| 0.042 | 47. BD ( 2) C 21 - C 26 | /***. BD*( 1) C 16 - N 17 | 3.22  | 0.58 |
| 0.040 | 47. BD ( 2) C 21 - C 26 | /***. BD*( 1) N 17 - C 18 | 3.05  | 0.56 |
| 0.056 | 47. BD ( 2) C 21 - C 26 | /***. BD*( 2) C 22 - C 23 | 16.25 | 0.24 |
| 0.049 | 47. BD ( 2) C 21 - C 26 | /***. BD*( 2) C 24 - C 25 | 13.12 | 0.23 |
| 0.032 | 47. BD ( 2) C 21 - C 26 | /***. BD*( 1) C 29 - C 30 | 2.13  | 0.51 |
| 0.033 | 47. BD ( 2) C 21 - C 26 | /***. BD*( 1) C 29 - C 61 | 2.20  | 0.51 |
| 0.036 | 48. BD ( 1) C 22 - C 23 | /506. RY*( 1) C 21        | 0.86  | 1.89 |
| 0.038 | 48. BD ( 1) C 22 - C 23 | /549. RY*( 2) C 24        | 0.97  | 1.83 |
| 0.027 | 48. BD ( 1) C 22 - C 23 | /590. RY*( 1) C 27        | 0.53  | 1.70 |
| 0.063 | 48. BD ( 1) C 22 - C 23 | /***. BD*( 1) N 17 - C 21 | 5.34  | 0.92 |
| 0.036 | 48. BD ( 1) C 22 - C 23 | /***. BD*( 1) C 21 - C 22 | 1.53  | 1.08 |
| 0.023 | 48. BD ( 1) C 22 - C 23 | /***. BD*( 1) C 22 - C 27 | 0.71  | 0.96 |
| 0.038 | 48. BD ( 1) C 22 - C 23 | /***. BD*( 1) C 23 - C 24 | 1.57  | 1.12 |
| 0.044 | 48. BD ( 1) C 22 - C 23 | /***. BD*( 1) C 24 - H 66 | 2.47  | 0.97 |
| 0.025 | 48. BD ( 1) C 22 - C 23 | /***. BD*( 1) C 27 - H 84 | 0.84  | 0.95 |
| 0.023 | 49. BD ( 2) C 22 - C 23 | /550. RY*( 3) C 24        | 0.68  | 0.79 |
| 0.051 | 49. BD ( 2) C 22 - C 23 | /***. BD*( 2) C 21 - C 26 | 14.54 | 0.22 |
| 0.054 | 49. BD ( 2) C 22 - C 23 | /***. BD*( 2) C 24 - C 25 | 16.49 | 0.22 |
| 0.036 | 49. BD ( 2) C 22 - C 23 | /***. BD*( 1) C 27 - C 28 | 2.60  | 0.50 |
| 0.018 | 49. BD ( 2) C 22 - C 23 | /***. BD*( 1) C 27 - C 62 | 0.67  | 0.52 |
| 0.020 | 49. BD ( 2) C 22 - C 23 | /***. BD*( 1) C 27 - H 84 | 0.77  | 0.54 |
| 0.045 | 50. BD ( 1) C 22 - C 27 | /506. RY*( 1) C 21        | 1.41  | 1.81 |
| 0.037 | 50. BD ( 1) C 22 - C 27 | /534. RY*( 1) C 23        | 0.87  | 1.98 |
| 0.024 | 50. BD ( 1) C 22 - C 27 | /***. BD*( 1) C 21 - C 22 | 0.73  | 1.00 |
| 0.056 | 50. BD ( 1) C 22 - C 27 | /***. BD*( 1) C 21 - C 26 | 3.95  | 1.00 |
| 0.025 | 50. BD ( 1) C 22 - C 27 | /***. BD*( 1) C 22 - C 23 | 0.77  | 1.03 |
| 0.048 | 50. BD ( 1) C 22 - C 27 | /***. BD*( 1) C 23 - C 24 | 2.75  | 1.04 |
| 0.032 | 50. BD ( 1) C 22 - C 27 | /***. BD*( 1) C 28 - H 90 | 1.50  | 0.87 |
| 0.030 | 50. BD ( 1) C 22 - C 27 | /***. BD*( 1) C 62 - H 87 | 1.24  | 0.88 |

|       |                         |                           |       |      |
|-------|-------------------------|---------------------------|-------|------|
| 0.044 | 51. BD ( 1) C 23 - C 24 | /520. RY*( 1) C 22        | 1.26  | 1.93 |
| 0.031 | 51. BD ( 1) C 23 - C 24 | /563. RY*( 2) C 25        | 0.71  | 1.73 |
| 0.040 | 51. BD ( 1) C 23 - C 24 | /***. BD*( 1) C 22 - C 23 | 1.81  | 1.11 |
| 0.056 | 51. BD ( 1) C 23 - C 24 | /***. BD*( 1) C 22 - C 27 | 4.11  | 0.96 |
| 0.036 | 51. BD ( 1) C 23 - C 24 | /***. BD*( 1) C 24 - C 25 | 1.48  | 1.12 |
| 0.046 | 51. BD ( 1) C 23 - C 24 | /***. BD*( 1) C 25 - H 65 | 2.67  | 0.98 |
| 0.047 | 52. BD ( 1) C 23 - H 67 | /520. RY*( 1) C 22        | 1.59  | 1.75 |
| 0.037 | 52. BD ( 1) C 23 - H 67 | /548. RY*( 1) C 24        | 0.99  | 1.67 |
| 0.062 | 52. BD ( 1) C 23 - H 67 | /***. BD*( 1) C 21 - C 22 | 5.24  | 0.91 |
| 0.054 | 52. BD ( 1) C 23 - H 67 | /***. BD*( 1) C 24 - C 25 | 3.93  | 0.94 |
| 0.029 | 53. BD ( 1) C 24 - C 25 | /534. RY*( 1) C 23        | 0.51  | 2.06 |
| 0.025 | 53. BD ( 1) C 24 - C 25 | /535. RY*( 2) C 23        | 0.53  | 1.49 |
| 0.048 | 53. BD ( 1) C 24 - C 25 | /576. RY*( 1) C 26        | 1.39  | 2.04 |
| 0.036 | 53. BD ( 1) C 24 - C 25 | /***. BD*( 1) C 23 - C 24 | 1.46  | 1.13 |
| 0.044 | 53. BD ( 1) C 24 - C 25 | /***. BD*( 1) C 23 - H 67 | 2.51  | 0.99 |
| 0.040 | 53. BD ( 1) C 24 - C 25 | /***. BD*( 1) C 25 - C 26 | 1.81  | 1.11 |
| 0.056 | 53. BD ( 1) C 24 - C 25 | /***. BD*( 1) C 26 - C 29 | 4.04  | 0.96 |
| 0.056 | 54. BD ( 2) C 24 - C 25 | /***. BD*( 2) C 21 - C 26 | 16.61 | 0.23 |
| 0.050 | 54. BD ( 2) C 24 - C 25 | /***. BD*( 2) C 22 - C 23 | 13.26 | 0.24 |
| 0.046 | 55. BD ( 1) C 24 - H 66 | /534. RY*( 1) C 23        | 1.41  | 1.88 |
| 0.046 | 55. BD ( 1) C 24 - H 66 | /562. RY*( 1) C 25        | 1.41  | 1.88 |
| 0.021 | 55. BD ( 1) C 24 - H 66 | /***. RY*( 1) H 65        | 0.52  | 1.07 |
| 0.021 | 55. BD ( 1) C 24 - H 66 | /***. RY*( 1) H 67        | 0.52  | 1.08 |
| 0.058 | 55. BD ( 1) C 24 - H 66 | /***. BD*( 1) C 22 - C 23 | 4.52  | 0.93 |
| 0.058 | 55. BD ( 1) C 24 - H 66 | /***. BD*( 1) C 25 - C 26 | 4.54  | 0.92 |
| 0.037 | 56. BD ( 1) C 25 - C 26 | /506. RY*( 1) C 21        | 0.89  | 1.89 |
| 0.037 | 56. BD ( 1) C 25 - C 26 | /549. RY*( 2) C 24        | 0.92  | 1.84 |
| 0.032 | 56. BD ( 1) C 25 - C 26 | /618. RY*( 1) C 29        | 0.72  | 1.74 |
| 0.062 | 56. BD ( 1) C 25 - C 26 | /***. BD*( 1) N 17 - C 21 | 5.15  | 0.92 |
| 0.038 | 56. BD ( 1) C 25 - C 26 | /***. BD*( 1) C 21 - C 26 | 1.66  | 1.09 |
| 0.037 | 56. BD ( 1) C 25 - C 26 | /***. BD*( 1) C 24 - C 25 | 1.56  | 1.12 |
| 0.044 | 56. BD ( 1) C 25 - C 26 | /***. BD*( 1) C 24 - H 66 | 2.53  | 0.98 |
| 0.023 | 56. BD ( 1) C 25 - C 26 | /***. BD*( 1) C 26 - C 29 | 0.71  | 0.95 |
| 0.028 | 56. BD ( 1) C 25 - C 26 | /***. BD*( 1) C 29 - H 83 | 1.07  | 0.94 |
| 0.037 | 57. BD ( 1) C 25 - H 65 | /548. RY*( 1) C 24        | 1.00  | 1.68 |

|                         |                           |      |      |
|-------------------------|---------------------------|------|------|
| 57. BD ( 1) C 25 - H 65 | /576. RY*( 1) C 26        | 1.63 | 1.86 |
| 0.049                   |                           |      |      |
| 57. BD ( 1) C 25 - H 65 | /***. BD*( 1) C 21 - C 26 | 5.28 | 0.91 |
| 0.062                   |                           |      |      |
| 57. BD ( 1) C 25 - H 65 | /***. BD*( 1) C 23 - C 24 | 3.84 | 0.95 |
| 0.054                   |                           |      |      |
| 58. BD ( 1) C 26 - C 29 | /506. RY*( 1) C 21        | 1.45 | 1.81 |
| 0.046                   |                           |      |      |
| 58. BD ( 1) C 26 - C 29 | /562. RY*( 1) C 25        | 0.90 | 1.98 |
| 0.038                   |                           |      |      |
| 58. BD ( 1) C 26 - C 29 | /***. BD*( 1) C 21 - C 22 | 3.78 | 1.01 |
| 0.055                   |                           |      |      |
| 58. BD ( 1) C 26 - C 29 | /***. BD*( 1) C 21 - C 26 | 0.76 | 1.01 |
| 0.025                   |                           |      |      |
| 58. BD ( 1) C 26 - C 29 | /***. BD*( 1) C 24 - C 25 | 2.73 | 1.04 |
| 0.048                   |                           |      |      |
| 58. BD ( 1) C 26 - C 29 | /***. BD*( 1) C 25 - C 26 | 0.77 | 1.02 |
| 0.025                   |                           |      |      |
| 58. BD ( 1) C 26 - C 29 | /***. BD*( 1) C 30 - H 93 | 1.42 | 0.87 |
| 0.032                   |                           |      |      |
| 58. BD ( 1) C 26 - C 29 | /***. BD*( 1) C 61 - H 96 | 1.41 | 0.88 |
| 0.032                   |                           |      |      |
| 59. BD ( 1) C 27 - C 28 | /521. RY*( 2) C 22        | 0.63 | 1.21 |
| 0.025                   |                           |      |      |
| 59. BD ( 1) C 27 - C 28 | /***. RY*( 1) C 62        | 0.53 | 1.34 |
| 0.024                   |                           |      |      |
| 59. BD ( 1) C 27 - C 28 | /***. BD*( 1) C 21 - C 22 | 0.96 | 0.98 |
| 0.028                   |                           |      |      |
| 59. BD ( 1) C 27 - C 28 | /***. BD*( 1) C 22 - C 23 | 0.79 | 1.01 |
| 0.025                   |                           |      |      |
| 59. BD ( 1) C 27 - C 28 | /***. BD*( 2) C 22 - C 23 | 2.92 | 0.54 |
| 0.038                   |                           |      |      |
| 59. BD ( 1) C 27 - C 28 | /***. BD*( 1) C 62 - H 89 | 1.46 | 0.90 |
| 0.032                   |                           |      |      |
| 60. BD ( 1) C 27 - C 62 | /***. BD*( 1) C 21 - C 22 | 3.47 | 0.98 |
| 0.052                   |                           |      |      |
| 60. BD ( 1) C 27 - C 62 | /***. BD*( 2) C 22 - C 23 | 0.63 | 0.54 |
| 0.018                   |                           |      |      |
| 60. BD ( 1) C 27 - C 62 | /***. BD*( 1) C 22 - C 27 | 0.62 | 0.86 |
| 0.021                   |                           |      |      |
| 60. BD ( 1) C 27 - C 62 | /***. BD*( 1) C 28 - H 91 | 1.75 | 0.85 |
| 0.035                   |                           |      |      |
| 61. BD ( 1) C 27 - H 84 | /***. BD*( 1) C 22 - C 23 | 4.48 | 0.89 |
| 0.057                   |                           |      |      |
| 61. BD ( 1) C 27 - H 84 | /***. BD*( 2) C 22 - C 23 | 0.84 | 0.43 |
| 0.018                   |                           |      |      |
| 61. BD ( 1) C 27 - H 84 | /***. BD*( 1) C 28 - H 92 | 2.73 | 0.73 |
| 0.040                   |                           |      |      |
| 61. BD ( 1) C 27 - H 84 | /***. BD*( 1) C 62 - H 88 | 2.93 | 0.74 |
| 0.042                   |                           |      |      |
| 62. BD ( 1) C 28 - H 90 | /***. BD*( 1) C 22 - C 27 | 3.24 | 0.77 |
| 0.045                   |                           |      |      |
| 63. BD ( 1) C 28 - H 91 | /***. BD*( 1) C 27 - C 62 | 2.84 | 0.74 |
| 0.041                   |                           |      |      |
| 64. BD ( 1) C 28 - H 92 | /***. BD*( 1) C 27 - H 84 | 2.34 | 0.76 |
| 0.038                   |                           |      |      |
| 65. BD ( 1) C 29 - C 30 | /577. RY*( 2) C 26        | 0.83 | 1.33 |
| 0.030                   |                           |      |      |
| 65. BD ( 1) C 29 - C 30 | /***. BD*( 1) C 21 - C 26 | 2.32 | 0.99 |
| 0.043                   |                           |      |      |
| 65. BD ( 1) C 29 - C 30 | /***. BD*( 2) C 21 - C 26 | 2.00 | 0.55 |
| 0.033                   |                           |      |      |
| 65. BD ( 1) C 29 - C 30 | /***. BD*( 1) C 26 - C 29 | 0.53 | 0.86 |
| 0.019                   |                           |      |      |
| 65. BD ( 1) C 29 - C 30 | /***. BD*( 1) C 61 - H 97 | 1.54 | 0.89 |
| 0.033                   |                           |      |      |
| 66. BD ( 1) C 29 - C 61 | /***. BD*( 1) C 21 - C 26 | 2.28 | 0.99 |
| 0.043                   |                           |      |      |
| 66. BD ( 1) C 29 - C 61 | /***. BD*( 2) C 21 - C 26 | 2.03 | 0.54 |
| 0.033                   |                           |      |      |

|       |                         |                           |       |      |
|-------|-------------------------|---------------------------|-------|------|
| 0.020 | 66. BD ( 1) C 29 - C 61 | /***. BD*( 1) C 26 - C 29 | 0.58  | 0.86 |
| 0.034 | 66. BD ( 1) C 29 - C 61 | /***. BD*( 1) C 30 - H 95 | 1.66  | 0.85 |
| 0.059 | 67. BD ( 1) C 29 - H 83 | /***. BD*( 1) C 25 - C 26 | 4.77  | 0.90 |
| 0.041 | 67. BD ( 1) C 29 - H 83 | /***. BD*( 1) C 30 - H 94 | 2.79  | 0.74 |
| 0.041 | 67. BD ( 1) C 29 - H 83 | /***. BD*( 1) C 61 - H 98 | 2.80  | 0.75 |
| 0.045 | 68. BD ( 1) C 30 - H 93 | /***. BD*( 1) C 26 - C 29 | 3.34  | 0.76 |
| 0.037 | 69. BD ( 1) C 30 - H 94 | /***. BD*( 1) C 29 - H 83 | 2.25  | 0.76 |
| 0.042 | 70. BD ( 1) C 30 - H 95 | /***. BD*( 1) C 29 - C 61 | 3.10  | 0.73 |
| 0.029 | 71. BD ( 1) C 31 - C 32 | /493. RY*( 2) N 20        | 0.68  | 1.48 |
| 0.035 | 71. BD ( 1) C 31 - C 32 | /717. RY*( 2) C 36        | 0.85  | 1.76 |
| 0.036 | 71. BD ( 1) C 31 - C 32 | /***. BD*( 1) C 16 - N 20 | 1.63  | 0.99 |
| 0.024 | 71. BD ( 1) C 31 - C 32 | /***. BD*( 1) C 19 - N 20 | 0.74  | 0.97 |
| 0.046 | 71. BD ( 1) C 31 - C 32 | /***. BD*( 1) C 31 - C 36 | 2.43  | 1.09 |
| 0.034 | 71. BD ( 1) C 31 - C 32 | /***. BD*( 1) C 32 - C 33 | 1.33  | 1.10 |
| 0.021 | 71. BD ( 1) C 31 - C 32 | /***. BD*( 1) C 32 - C 37 | 0.59  | 0.96 |
| 0.047 | 71. BD ( 1) C 31 - C 32 | /***. BD*( 1) C 33 - H 70 | 2.86  | 0.98 |
| 0.053 | 71. BD ( 1) C 31 - C 32 | /***. BD*( 1) C 36 - C 39 | 3.62  | 0.96 |
| 0.024 | 71. BD ( 1) C 31 - C 32 | /***. BD*( 1) C 37 - C 38 | 0.79  | 0.92 |
| 0.028 | 72. BD ( 1) C 31 - C 36 | /493. RY*( 2) N 20        | 0.64  | 1.48 |
| 0.027 | 72. BD ( 1) C 31 - C 36 | /661. RY*( 2) C 32        | 0.58  | 1.57 |
| 0.027 | 72. BD ( 1) C 31 - C 36 | /703. RY*( 2) C 35        | 0.52  | 1.72 |
| 0.033 | 72. BD ( 1) C 31 - C 36 | /***. BD*( 1) C 16 - N 20 | 1.39  | 0.99 |
| 0.029 | 72. BD ( 1) C 31 - C 36 | /***. BD*( 1) C 19 - N 20 | 1.11  | 0.97 |
| 0.046 | 72. BD ( 1) C 31 - C 36 | /***. BD*( 1) C 31 - C 32 | 2.41  | 1.09 |
| 0.052 | 72. BD ( 1) C 31 - C 36 | /***. BD*( 1) C 32 - C 37 | 3.59  | 0.96 |
| 0.034 | 72. BD ( 1) C 31 - C 36 | /***. BD*( 1) C 35 - C 36 | 1.33  | 1.11 |
| 0.048 | 72. BD ( 1) C 31 - C 36 | /***. BD*( 1) C 35 - H 68 | 2.86  | 0.98 |
| 0.022 | 72. BD ( 1) C 31 - C 36 | /***. BD*( 1) C 36 - C 39 | 0.61  | 0.96 |
| 0.020 | 72. BD ( 1) C 31 - C 36 | /***. BD*( 1) C 39 - C 40 | 0.52  | 0.92 |
| 0.022 | 72. BD ( 1) C 31 - C 36 | /***. BD*( 1) C 39 - C 56 | 0.66  | 0.94 |
| 0.031 | 73. BD ( 2) C 31 - C 36 | /704. RY*( 3) C 35        | 1.25  | 0.81 |
| 0.042 | 73. BD ( 2) C 31 - C 36 | /***. BD*( 1) C 16 - N 20 | 3.20  | 0.59 |
| 0.041 | 73. BD ( 2) C 31 - C 36 | /***. BD*( 1) C 19 - N 20 | 3.15  | 0.56 |
| 0.056 | 73. BD ( 2) C 31 - C 36 | /***. BD*( 2) C 32 - C 33 | 16.93 | 0.23 |
| 0.050 | 73. BD ( 2) C 31 - C 36 | /***. BD*( 2) C 34 - C 35 | 13.39 | 0.23 |

|       |                         |                            |       |      |
|-------|-------------------------|----------------------------|-------|------|
| 0.033 | 73. BD ( 2) C 31 - C 36 | /***. BD*( 1) C 39 - C 40  | 2.20  | 0.51 |
| 0.031 | 73. BD ( 2) C 31 - C 36 | /***. BD*( 1) C 39 - C 56  | 1.94  | 0.53 |
| 0.036 | 74. BD ( 1) C 32 - C 33 | /646. RY*( 1) C 31         | 0.83  | 1.95 |
| 0.038 | 74. BD ( 1) C 32 - C 33 | /689. RY*( 2) C 34         | 0.95  | 1.84 |
| 0.032 | 74. BD ( 1) C 32 - C 33 | /730. RY*( 1) C 37         | 0.73  | 1.75 |
| 0.061 | 74. BD ( 1) C 32 - C 33 | /***. BD*( 1) N 20 - C 31  | 5.01  | 0.93 |
| 0.037 | 74. BD ( 1) C 32 - C 33 | /***. BD*( 1) C 31 - C 32  | 1.55  | 1.08 |
| 0.023 | 74. BD ( 1) C 32 - C 33 | /***. BD*( 1) C 32 - C 37  | 0.71  | 0.95 |
| 0.037 | 74. BD ( 1) C 32 - C 33 | /***. BD*( 1) C 33 - C 34  | 1.55  | 1.12 |
| 0.044 | 74. BD ( 1) C 32 - C 33 | /***. BD*( 1) C 34 - H 69  | 2.50  | 0.98 |
| 0.027 | 74. BD ( 1) C 32 - C 33 | /***. BD*( 1) C 37 - H 85  | 1.00  | 0.95 |
| 0.024 | 75. BD ( 2) C 32 - C 33 | /690. RY*( 3) C 34         | 0.72  | 0.83 |
| 0.051 | 75. BD ( 2) C 32 - C 33 | /***. BD*( 2) C 31 - C 36  | 14.02 | 0.23 |
| 0.054 | 75. BD ( 2) C 32 - C 33 | /***. BD*( 2) C 34 - C 35  | 16.14 | 0.22 |
| 0.026 | 75. BD ( 2) C 32 - C 33 | /***. BD*( 1) C 37 - C 38  | 1.38  | 0.51 |
| 0.033 | 75. BD ( 2) C 32 - C 33 | /***. BD*( 1) C 37 - C 55  | 2.18  | 0.51 |
| 0.048 | 76. BD ( 1) C 32 - C 37 | /646. RY*( 1) C 31         | 1.54  | 1.87 |
| 0.038 | 76. BD ( 1) C 32 - C 37 | /674. RY*( 1) C 33         | 0.91  | 1.98 |
| 0.024 | 76. BD ( 1) C 32 - C 37 | /***. BD*( 1) C 31 - C 32  | 0.72  | 1.01 |
| 0.055 | 76. BD ( 1) C 32 - C 37 | /***. BD*( 1) C 31 - C 36  | 3.77  | 1.01 |
| 0.025 | 76. BD ( 1) C 32 - C 37 | /***. BD*( 1) C 32 - C 33  | 0.77  | 1.02 |
| 0.048 | 76. BD ( 1) C 32 - C 37 | /***. BD*( 1) C 33 - C 34  | 2.71  | 1.04 |
| 0.031 | 76. BD ( 1) C 32 - C 37 | /***. BD*( 1) C 38 - H 105 | 1.33  | 0.88 |
| 0.032 | 76. BD ( 1) C 32 - C 37 | /***. BD*( 1) C 55 - H 108 | 1.44  | 0.88 |
| 0.047 | 77. BD ( 1) C 33 - C 34 | /660. RY*( 1) C 32         | 1.35  | 2.04 |
| 0.030 | 77. BD ( 1) C 33 - C 34 | /703. RY*( 2) C 35         | 0.64  | 1.73 |
| 0.040 | 77. BD ( 1) C 33 - C 34 | /***. BD*( 1) C 32 - C 33  | 1.79  | 1.11 |
| 0.056 | 77. BD ( 1) C 33 - C 34 | /***. BD*( 1) C 32 - C 37  | 4.03  | 0.96 |
| 0.037 | 77. BD ( 1) C 33 - C 34 | /***. BD*( 1) C 34 - C 35  | 1.49  | 1.12 |
| 0.045 | 77. BD ( 1) C 33 - C 34 | /***. BD*( 1) C 35 - H 68  | 2.62  | 0.99 |
| 0.050 | 78. BD ( 1) C 33 - H 70 | /660. RY*( 1) C 32         | 1.66  | 1.86 |
| 0.037 | 78. BD ( 1) C 33 - H 70 | /688. RY*( 1) C 34         | 1.01  | 1.67 |
| 0.061 | 78. BD ( 1) C 33 - H 70 | /***. BD*( 1) C 31 - C 32  | 5.16  | 0.91 |
| 0.055 | 78. BD ( 1) C 33 - H 70 | /***. BD*( 1) C 34 - C 35  | 3.93  | 0.94 |
| 0.048 | 79. BD ( 1) C 34 - C 35 | /716. RY*( 1) C 36         | 1.41  | 2.03 |

|       |                     |                            |       |      |
|-------|---------------------|----------------------------|-------|------|
| 79.   | BD ( 1) C 34 - C 35 | /***. BD*( 1) C 33 - C 34  | 1.48  | 1.12 |
| 0.036 |                     |                            |       |      |
| 79.   | BD ( 1) C 34 - C 35 | /***. BD*( 1) C 33 - H 70  | 2.61  | 0.98 |
| 0.045 |                     |                            |       |      |
| 79.   | BD ( 1) C 34 - C 35 | /***. BD*( 1) C 35 - C 36  | 1.77  | 1.11 |
| 0.040 |                     |                            |       |      |
| 79.   | BD ( 1) C 34 - C 35 | /***. BD*( 1) C 36 - C 39  | 4.04  | 0.97 |
| 0.056 |                     |                            |       |      |
| 80.   | BD ( 2) C 34 - C 35 | /***. BD*( 2) C 31 - C 36  | 16.61 | 0.23 |
| 0.056 |                     |                            |       |      |
| 80.   | BD ( 2) C 34 - C 35 | /***. BD*( 2) C 32 - C 33  | 13.72 | 0.23 |
| 0.050 |                     |                            |       |      |
| 81.   | BD ( 1) C 34 - H 69 | /674. RY*( 1) C 33         | 1.41  | 1.88 |
| 0.046 |                     |                            |       |      |
| 81.   | BD ( 1) C 34 - H 69 | /702. RY*( 1) C 35         | 1.44  | 1.86 |
| 0.046 |                     |                            |       |      |
| 81.   | BD ( 1) C 34 - H 69 | /***. RY*( 1) H 68         | 0.51  | 1.08 |
| 0.021 |                     |                            |       |      |
| 81.   | BD ( 1) C 34 - H 69 | /***. RY*( 1) H 70         | 0.52  | 1.07 |
| 0.021 |                     |                            |       |      |
| 81.   | BD ( 1) C 34 - H 69 | /***. BD*( 1) C 32 - C 33  | 4.50  | 0.93 |
| 0.058 |                     |                            |       |      |
| 81.   | BD ( 1) C 34 - H 69 | /***. BD*( 1) C 35 - C 36  | 4.57  | 0.93 |
| 0.058 |                     |                            |       |      |
| 82.   | BD ( 1) C 35 - C 36 | /646. RY*( 1) C 31         | 0.86  | 1.95 |
| 0.037 |                     |                            |       |      |
| 82.   | BD ( 1) C 35 - C 36 | /689. RY*( 2) C 34         | 0.95  | 1.84 |
| 0.038 |                     |                            |       |      |
| 82.   | BD ( 1) C 35 - C 36 | /758. RY*( 1) C 39         | 0.72  | 1.75 |
| 0.032 |                     |                            |       |      |
| 82.   | BD ( 1) C 35 - C 36 | /***. BD*( 1) N 20 - C 31  | 5.12  | 0.93 |
| 0.062 |                     |                            |       |      |
| 82.   | BD ( 1) C 35 - C 36 | /***. BD*( 1) C 31 - C 36  | 1.57  | 1.09 |
| 0.037 |                     |                            |       |      |
| 82.   | BD ( 1) C 35 - C 36 | /***. BD*( 1) C 34 - C 35  | 1.54  | 1.12 |
| 0.037 |                     |                            |       |      |
| 82.   | BD ( 1) C 35 - C 36 | /***. BD*( 1) C 34 - H 69  | 2.54  | 0.98 |
| 0.045 |                     |                            |       |      |
| 82.   | BD ( 1) C 35 - C 36 | /***. BD*( 1) C 36 - C 39  | 0.73  | 0.96 |
| 0.024 |                     |                            |       |      |
| 82.   | BD ( 1) C 35 - C 36 | /***. BD*( 1) C 39 - H 86  | 0.98  | 0.95 |
| 0.027 |                     |                            |       |      |
| 83.   | BD ( 1) C 35 - H 68 | /688. RY*( 1) C 34         | 1.02  | 1.67 |
| 0.037 |                     |                            |       |      |
| 83.   | BD ( 1) C 35 - H 68 | /716. RY*( 1) C 36         | 1.68  | 1.85 |
| 0.050 |                     |                            |       |      |
| 83.   | BD ( 1) C 35 - H 68 | /***. BD*( 1) C 31 - C 36  | 5.24  | 0.91 |
| 0.062 |                     |                            |       |      |
| 83.   | BD ( 1) C 35 - H 68 | /***. BD*( 1) C 33 - C 34  | 3.97  | 0.94 |
| 0.055 |                     |                            |       |      |
| 84.   | BD ( 1) C 36 - C 39 | /646. RY*( 1) C 31         | 1.54  | 1.87 |
| 0.048 |                     |                            |       |      |
| 84.   | BD ( 1) C 36 - C 39 | /702. RY*( 1) C 35         | 0.90  | 1.95 |
| 0.038 |                     |                            |       |      |
| 84.   | BD ( 1) C 36 - C 39 | /***. BD*( 1) C 31 - C 32  | 3.85  | 1.00 |
| 0.056 |                     |                            |       |      |
| 84.   | BD ( 1) C 36 - C 39 | /***. BD*( 1) C 31 - C 36  | 0.75  | 1.01 |
| 0.025 |                     |                            |       |      |
| 84.   | BD ( 1) C 36 - C 39 | /***. BD*( 1) C 34 - C 35  | 2.78  | 1.04 |
| 0.048 |                     |                            |       |      |
| 84.   | BD ( 1) C 36 - C 39 | /***. BD*( 1) C 35 - C 36  | 0.79  | 1.02 |
| 0.025 |                     |                            |       |      |
| 84.   | BD ( 1) C 36 - C 39 | /***. BD*( 1) C 40 - H 99  | 1.42  | 0.88 |
| 0.032 |                     |                            |       |      |
| 84.   | BD ( 1) C 36 - C 39 | /***. BD*( 1) C 56 - H 102 | 1.36  | 0.89 |
| 0.031 |                     |                            |       |      |
| 85.   | BD ( 1) C 37 - C 38 | /661. RY*( 2) C 32         | 0.77  | 1.47 |
| 0.030 |                     |                            |       |      |
| 85.   | BD ( 1) C 37 - C 38 | /***. BD*( 1) C 31 - C 32  | 2.68  | 0.99 |
| 0.046 |                     |                            |       |      |



|       |                          |                            |      |      |
|-------|--------------------------|----------------------------|------|------|
| 0.027 | 85. BD ( 1) C 37 - C 38  | /***. BD*( 2) C 32 - C 33  | 1.40 | 0.54 |
| 0.019 | 85. BD ( 1) C 37 - C 38  | /***. BD*( 1) C 32 - C 37  | 0.53 | 0.86 |
| 0.033 | 85. BD ( 1) C 37 - C 38  | /***. BD*( 1) C 55 - H 110 | 1.52 | 0.89 |
| 0.026 | 86. BD ( 1) C 37 - C 55  | /662. RY*( 3) C 32         | 0.60 | 1.42 |
| 0.023 | 86. BD ( 1) C 37 - C 55  | /744. RY*( 1) C 38         | 0.50 | 1.30 |
| 0.037 | 86. BD ( 1) C 37 - C 55  | /***. BD*( 1) C 31 - C 32  | 1.75 | 0.98 |
| 0.034 | 86. BD ( 1) C 37 - C 55  | /***. BD*( 2) C 32 - C 33  | 2.22 | 0.54 |
| 0.020 | 86. BD ( 1) C 37 - C 55  | /***. BD*( 1) C 32 - C 37  | 0.56 | 0.85 |
| 0.034 | 86. BD ( 1) C 37 - C 55  | /***. BD*( 1) C 38 - H 106 | 1.65 | 0.86 |
| 0.058 | 87. BD ( 1) C 37 - H 85  | /***. BD*( 1) C 32 - C 33  | 4.76 | 0.89 |
| 0.041 | 87. BD ( 1) C 37 - H 85  | /***. BD*( 1) C 38 - H 107 | 2.86 | 0.74 |
| 0.041 | 87. BD ( 1) C 37 - H 85  | /***. BD*( 1) C 55 - H 109 | 2.77 | 0.75 |
| 0.046 | 88. BD ( 1) C 38 - H 105 | /***. BD*( 1) C 32 - C 37  | 3.50 | 0.76 |
| 0.043 | 89. BD ( 1) C 38 - H 106 | /***. BD*( 1) C 37 - C 55  | 3.11 | 0.73 |
| 0.036 | 90. BD ( 1) C 38 - H 107 | /***. BD*( 1) C 37 - H 85  | 2.18 | 0.76 |
| 0.030 | 91. BD ( 1) C 39 - C 40  | /718. RY*( 3) C 36         | 0.84 | 1.32 |
| 0.040 | 91. BD ( 1) C 39 - C 40  | /***. BD*( 1) C 31 - C 36  | 2.06 | 0.99 |
| 0.035 | 91. BD ( 1) C 39 - C 40  | /***. BD*( 2) C 31 - C 36  | 2.33 | 0.54 |
| 0.019 | 91. BD ( 1) C 39 - C 40  | /***. BD*( 1) C 36 - C 39  | 0.51 | 0.86 |
| 0.033 | 91. BD ( 1) C 39 - C 40  | /***. BD*( 1) C 56 - H 103 | 1.51 | 0.89 |
| 0.044 | 92. BD ( 1) C 39 - C 56  | /***. BD*( 1) C 31 - C 36  | 2.50 | 0.98 |
| 0.031 | 92. BD ( 1) C 39 - C 56  | /***. BD*( 2) C 31 - C 36  | 1.85 | 0.53 |
| 0.020 | 92. BD ( 1) C 39 - C 56  | /***. BD*( 1) C 36 - C 39  | 0.58 | 0.85 |
| 0.034 | 92. BD ( 1) C 39 - C 56  | /***. BD*( 1) C 40 - H 101 | 1.64 | 0.85 |
| 0.059 | 93. BD ( 1) C 39 - H 86  | /***. BD*( 1) C 35 - C 36  | 4.95 | 0.89 |
| 0.041 | 93. BD ( 1) C 39 - H 86  | /***. BD*( 1) C 40 - H 100 | 2.79 | 0.74 |
| 0.042 | 93. BD ( 1) C 39 - H 86  | /***. BD*( 1) C 56 - H 104 | 2.88 | 0.75 |
| 0.045 | 94. BD ( 1) C 40 - H 99  | /***. BD*( 1) C 36 - C 39  | 3.30 | 0.76 |
| 0.037 | 95. BD ( 1) C 40 - H 100 | /***. BD*( 1) C 39 - H 86  | 2.21 | 0.76 |
| 0.042 | 96. BD ( 1) C 40 - H 101 | /***. BD*( 1) C 39 - C 56  | 3.04 | 0.74 |
| 0.034 | 97. BD ( 1) C 41 - C 42  | /787. RY*( 2) C 41         | 1.04 | 1.19 |
| 0.129 | 97. BD ( 1) C 41 - C 42  | /788. RY*( 3) C 41         | 9.87 | 1.87 |
| 0.094 | 97. BD ( 1) C 41 - C 42  | /789. RY*( 4) C 41         | 4.89 | 2.01 |
| 0.043 | 97. BD ( 1) C 41 - C 42  | /790. RY*( 5) C 41         | 0.94 | 2.14 |
| 0.053 | 97. BD ( 1) C 41 - C 42  | /792. RY*( 7) C 41         | 1.58 | 2.00 |

|       |                         |                           |        |      |
|-------|-------------------------|---------------------------|--------|------|
| 0.035 | 97. BD ( 1) C 41 - C 42 | /793. RY*( 8) C 41        | 0.69   | 2.01 |
| 0.192 | 97. BD ( 1) C 41 - C 42 | /794. RY*( 9) C 41        | 18.48  | 2.21 |
| 0.036 | 97. BD ( 1) C 41 - C 42 | /800. RY*( 2) C 42        | 0.98   | 1.46 |
| 0.035 | 97. BD ( 1) C 41 - C 42 | /802. RY*( 4) C 42        | 0.97   | 1.42 |
| 0.041 | 97. BD ( 1) C 41 - C 42 | /805. RY*( 7) C 42        | 0.81   | 2.25 |
| 0.053 | 97. BD ( 1) C 41 - C 42 | /809. RY*( 11) C 42       | 1.12   | 2.73 |
| 0.024 | 97. BD ( 1) C 41 - C 42 | /814. RY*( 2) C 43        | 0.54   | 1.15 |
| 0.030 | 97. BD ( 1) C 41 - C 42 | /815. RY*( 3) C 43        | 0.75   | 1.30 |
| 0.039 | 97. BD ( 1) C 41 - C 42 | /816. RY*( 4) C 43        | 0.97   | 1.72 |
| 0.042 | 97. BD ( 1) C 41 - C 42 | /855. RY*( 1) C 46        | 1.07   | 1.80 |
| 0.047 | 97. BD ( 1) C 41 - C 42 | /861. RY*( 7) C 46        | 1.10   | 2.18 |
| 0.050 | 97. BD ( 1) C 41 - C 42 | /865. RY*( 11) C 46       | 0.95   | 2.86 |
| 0.045 | 97. BD ( 1) C 41 - C 42 | /867. RY*( 13) C 46       | 0.78   | 2.85 |
| 0.033 | 97. BD ( 1) C 41 - C 42 | /***. BD*( 1) C 10 - N 11 | 1.61   | 0.75 |
| 0.031 | 97. BD ( 1) C 41 - C 42 | /***. BD*( 1) N 11 - C 12 | 1.43   | 0.75 |
| 0.568 | 97. BD ( 1) C 41 - C 42 | /***. BD*( 2) N 11 - C 41 | 257.93 | 1.40 |
| 0.136 | 97. BD ( 1) C 41 - C 42 | /***. BD*( 1) C 41 - C 42 | 19.91  | 1.04 |
| 0.168 | 97. BD ( 1) C 41 - C 42 | /***. BD*( 1) C 41 - C 46 | 30.24  | 1.05 |
| 0.065 | 97. BD ( 1) C 41 - C 42 | /***. BD*( 2) C 41 - C 46 | 11.43  | 0.43 |
| 0.022 | 97. BD ( 1) C 41 - C 42 | /***. BD*( 1) C 42 - C 47 | 0.76   | 0.74 |
| 0.051 | 97. BD ( 1) C 41 - C 42 | /***. BD*( 1) C 43 - H 75 | 3.84   | 0.76 |
| 0.026 | 97. BD ( 1) C 41 - C 42 | /***. BD*( 1) C 45 - C 46 | 0.88   | 0.88 |
| 0.048 | 97. BD ( 1) C 41 - C 42 | /***. BD*( 1) C 46 - C 49 | 3.54   | 0.73 |
| 0.031 | 97. BD ( 1) C 41 - C 42 | /***. BD*( 1) C 47 - C 57 | 1.52   | 0.71 |
| 0.036 | 98. BD ( 1) C 41 - C 46 | /787. RY*( 2) C 41        | 1.21   | 1.18 |
| 0.135 | 98. BD ( 1) C 41 - C 46 | /788. RY*( 3) C 41        | 10.73  | 1.86 |
| 0.089 | 98. BD ( 1) C 41 - C 46 | /789. RY*( 4) C 41        | 4.39   | 2.00 |
| 0.035 | 98. BD ( 1) C 41 - C 46 | /790. RY*( 5) C 41        | 0.63   | 2.13 |
| 0.059 | 98. BD ( 1) C 41 - C 46 | /792. RY*( 7) C 41        | 1.94   | 1.98 |
| 0.035 | 98. BD ( 1) C 41 - C 46 | /793. RY*( 8) C 41        | 0.69   | 2.00 |
| 0.196 | 98. BD ( 1) C 41 - C 46 | /794. RY*( 9) C 41        | 19.22  | 2.19 |
| 0.031 | 98. BD ( 1) C 41 - C 46 | /799. RY*( 1) C 42        | 0.60   | 1.76 |
| 0.056 | 98. BD ( 1) C 41 - C 46 | /805. RY*( 7) C 42        | 1.51   | 2.24 |
| 0.044 | 98. BD ( 1) C 41 - C 46 | /809. RY*( 11) C 42       | 0.79   | 2.72 |
| 0.038 | 98. BD ( 1) C 41 - C 46 | /811. RY*( 13) C 42       | 0.57   | 2.79 |

|        |                     |                           |        |      |
|--------|---------------------|---------------------------|--------|------|
| 98.046 | BD ( 1) C 41 - C 46 | /842. RY*( 2) C 45        | 1.57   | 1.50 |
| 98.040 | BD ( 1) C 41 - C 46 | /844. RY*( 4) C 45        | 1.04   | 1.71 |
| 98.041 | BD ( 1) C 41 - C 46 | /855. RY*( 1) C 46        | 1.04   | 1.79 |
| 98.038 | BD ( 1) C 41 - C 46 | /856. RY*( 2) C 46        | 1.01   | 1.53 |
| 98.046 | BD ( 1) C 41 - C 46 | /858. RY*( 4) C 46        | 1.65   | 1.39 |
| 98.053 | BD ( 1) C 41 - C 46 | /865. RY*( 11) C 46       | 1.09   | 2.84 |
| 98.040 | BD ( 1) C 41 - C 46 | /867. RY*( 13) C 46       | 0.63   | 2.84 |
| 98.035 | BD ( 1) C 41 - C 46 | /898. RY*( 2) C 49        | 0.71   | 1.90 |
| 98.027 | BD ( 1) C 41 - C 46 | /902. RY*( 6) C 49        | 0.52   | 1.58 |
| 98.036 | BD ( 1) C 41 - C 46 | /***. BD*( 1) C 10 - N 11 | 1.99   | 0.74 |
| 98.022 | BD ( 1) C 41 - C 46 | /***. BD*( 1) N 11 - C 12 | 0.71   | 0.73 |
| 98.031 | BD ( 1) C 41 - C 46 | /***. BD*( 1) N 11 - C 41 | 1.54   | 0.70 |
| 98.593 | BD ( 1) C 41 - C 46 | /***. BD*( 2) N 11 - C 41 | 285.62 | 1.39 |
| 98.173 | BD ( 1) C 41 - C 46 | /***. BD*( 1) C 41 - C 42 | 32.29  | 1.03 |
| 98.141 | BD ( 1) C 41 - C 46 | /***. BD*( 1) C 41 - C 46 | 21.41  | 1.03 |
| 98.064 | BD ( 1) C 41 - C 46 | /***. BD*( 2) C 41 - C 46 | 11.68  | 0.42 |
| 98.024 | BD ( 1) C 41 - C 46 | /***. BD*( 1) C 42 - C 43 | 0.72   | 0.87 |
| 98.045 | BD ( 1) C 41 - C 46 | /***. BD*( 1) C 42 - C 47 | 3.14   | 0.73 |
| 98.052 | BD ( 1) C 41 - C 46 | /***. BD*( 1) C 45 - H 73 | 4.03   | 0.74 |
| 98.022 | BD ( 1) C 41 - C 46 | /***. BD*( 1) C 46 - C 49 | 0.72   | 0.72 |
| 98.023 | BD ( 1) C 41 - C 46 | /***. BD*( 1) C 49 - C 50 | 0.86   | 0.68 |
| 98.025 | BD ( 1) C 41 - C 46 | /***. BD*( 1) C 49 - C 58 | 0.99   | 0.68 |
| 99.044 | BD ( 2) C 41 - C 46 | /788. RY*( 3) C 41        | 1.20   | 1.67 |
| 99.030 | BD ( 2) C 41 - C 46 | /789. RY*( 4) C 41        | 0.53   | 1.81 |
| 99.071 | BD ( 2) C 41 - C 46 | /794. RY*( 9) C 41        | 2.64   | 2.00 |
| 99.032 | BD ( 2) C 41 - C 46 | /843. RY*( 3) C 45        | 1.44   | 0.73 |
| 99.041 | BD ( 2) C 41 - C 46 | /***. BD*( 1) C 10 - N 11 | 3.32   | 0.55 |
| 99.039 | BD ( 2) C 41 - C 46 | /***. BD*( 1) N 11 - C 12 | 2.92   | 0.54 |
| 99.160 | BD ( 2) C 41 - C 46 | /***. BD*( 2) N 11 - C 41 | 25.32  | 1.20 |
| 99.065 | BD ( 2) C 41 - C 46 | /***. BD*( 1) C 41 - C 42 | 5.32   | 0.84 |
| 99.064 | BD ( 2) C 41 - C 46 | /***. BD*( 1) C 41 - C 46 | 5.13   | 0.84 |
| 99.021 | BD ( 2) C 41 - C 46 | /***. BD*( 2) C 41 - C 46 | 2.35   | 0.23 |
| 99.054 | BD ( 2) C 41 - C 46 | /***. BD*( 2) C 42 - C 43 | 16.81  | 0.22 |
| 99.050 | BD ( 2) C 41 - C 46 | /***. BD*( 2) C 44 - C 45 | 15.06  | 0.21 |
| 99.034 | BD ( 2) C 41 - C 46 | /***. BD*( 1) C 49 - C 50 | 2.47   | 0.49 |

|       |                     |                            |       |      |
|-------|---------------------|----------------------------|-------|------|
| 99.   | BD ( 2) C 41 - C 46 | /***. BD*( 1) C 49 - C 58  | 2.14  | 0.49 |
| 0.032 |                     |                            |       |      |
| 100.  | BD ( 1) C 42 - C 43 | /786. RY*( 1) C 41         | 0.83  | 1.92 |
| 0.036 |                     |                            |       |      |
| 100.  | BD ( 1) C 42 - C 43 | /828. RY*( 2) C 44         | 0.93  | 1.82 |
| 0.037 |                     |                            |       |      |
| 100.  | BD ( 1) C 42 - C 43 | /869. RY*( 1) C 47         | 0.56  | 1.68 |
| 0.028 |                     |                            |       |      |
| 100.  | BD ( 1) C 42 - C 43 | /***. BD*( 1) N 11 - C 41  | 5.04  | 0.93 |
| 0.061 |                     |                            |       |      |
| 100.  | BD ( 1) C 42 - C 43 | /***. BD*( 2) N 11 - C 41  | 1.13  | 1.62 |
| 0.043 |                     |                            |       |      |
| 100.  | BD ( 1) C 42 - C 43 | /***. BD*( 1) C 41 - C 42  | 1.45  | 1.26 |
| 0.038 |                     |                            |       |      |
| 100.  | BD ( 1) C 42 - C 43 | /***. BD*( 1) C 42 - C 47  | 0.70  | 0.96 |
| 0.023 |                     |                            |       |      |
| 100.  | BD ( 1) C 42 - C 43 | /***. BD*( 1) C 43 - C 44  | 1.58  | 1.12 |
| 0.038 |                     |                            |       |      |
| 100.  | BD ( 1) C 42 - C 43 | /***. BD*( 1) C 44 - H 74  | 2.53  | 0.97 |
| 0.044 |                     |                            |       |      |
| 100.  | BD ( 1) C 42 - C 43 | /***. BD*( 1) C 47 - H 80  | 0.81  | 0.98 |
| 0.025 |                     |                            |       |      |
| 101.  | BD ( 2) C 42 - C 43 | /829. RY*( 3) C 44         | 0.83  | 0.79 |
| 0.025 |                     |                            |       |      |
| 101.  | BD ( 2) C 42 - C 43 | /***. BD*( 2) C 41 - C 46  | 12.82 | 0.24 |
| 0.050 |                     |                            |       |      |
| 101.  | BD ( 2) C 42 - C 43 | /***. BD*( 2) C 44 - C 45  | 16.59 | 0.22 |
| 0.054 |                     |                            |       |      |
| 101.  | BD ( 2) C 42 - C 43 | /***. BD*( 1) C 47 - C 48  | 2.59  | 0.51 |
| 0.036 |                     |                            |       |      |
| 101.  | BD ( 2) C 42 - C 43 | /***. BD*( 1) C 47 - C 57  | 0.58  | 0.52 |
| 0.017 |                     |                            |       |      |
| 101.  | BD ( 2) C 42 - C 43 | /***. BD*( 1) C 47 - H 80  | 0.77  | 0.57 |
| 0.021 |                     |                            |       |      |
| 102.  | BD ( 1) C 42 - C 47 | /786. RY*( 1) C 41         | 1.48  | 1.84 |
| 0.047 |                     |                            |       |      |
| 102.  | BD ( 1) C 42 - C 47 | /813. RY*( 1) C 43         | 0.86  | 1.97 |
| 0.037 |                     |                            |       |      |
| 102.  | BD ( 1) C 42 - C 47 | /***. BD*( 2) N 11 - C 41  | 3.55  | 1.54 |
| 0.074 |                     |                            |       |      |
| 102.  | BD ( 1) C 42 - C 47 | /***. BD*( 1) C 41 - C 46  | 1.79  | 1.18 |
| 0.041 |                     |                            |       |      |
| 102.  | BD ( 1) C 42 - C 47 | /***. BD*( 1) C 42 - C 43  | 0.76  | 1.02 |
| 0.025 |                     |                            |       |      |
| 102.  | BD ( 1) C 42 - C 47 | /***. BD*( 1) C 43 - C 44  | 2.84  | 1.03 |
| 0.048 |                     |                            |       |      |
| 102.  | BD ( 1) C 42 - C 47 | /***. BD*( 1) C 48 - H 126 | 1.43  | 0.88 |
| 0.032 |                     |                            |       |      |
| 102.  | BD ( 1) C 42 - C 47 | /***. BD*( 1) C 57 - H 123 | 1.15  | 0.89 |
| 0.029 |                     |                            |       |      |
| 103.  | BD ( 1) C 43 - C 44 | /799. RY*( 1) C 42         | 1.24  | 2.00 |
| 0.045 |                     |                            |       |      |
| 103.  | BD ( 1) C 43 - C 44 | /842. RY*( 2) C 45         | 0.65  | 1.74 |
| 0.030 |                     |                            |       |      |
| 103.  | BD ( 1) C 43 - C 44 | /***. BD*( 1) C 42 - C 43  | 1.78  | 1.11 |
| 0.040 |                     |                            |       |      |
| 103.  | BD ( 1) C 43 - C 44 | /***. BD*( 1) C 42 - C 47  | 3.95  | 0.97 |
| 0.055 |                     |                            |       |      |
| 103.  | BD ( 1) C 43 - C 44 | /***. BD*( 1) C 44 - C 45  | 1.52  | 1.12 |
| 0.037 |                     |                            |       |      |
| 103.  | BD ( 1) C 43 - C 44 | /***. BD*( 1) C 45 - H 73  | 2.72  | 0.98 |
| 0.046 |                     |                            |       |      |
| 104.  | BD ( 1) C 43 - H 75 | /799. RY*( 1) C 42         | 1.62  | 1.82 |
| 0.049 |                     |                            |       |      |
| 104.  | BD ( 1) C 43 - H 75 | /827. RY*( 1) C 44         | 0.98  | 1.64 |
| 0.036 |                     |                            |       |      |
| 104.  | BD ( 1) C 43 - H 75 | /***. BD*( 1) C 41 - C 42  | 3.67  | 1.09 |
| 0.056 |                     |                            |       |      |
| 104.  | BD ( 1) C 43 - H 75 | /***. BD*( 1) C 44 - C 45  | 3.98  | 0.94 |
| 0.055 |                     |                            |       |      |

|         |                     |                            |       |      |
|---------|---------------------|----------------------------|-------|------|
| 105.029 | BD ( 1) C 44 - C 45 | /813. RY*( 1) C 43         | 0.52  | 2.06 |
| 105.048 | BD ( 1) C 44 - C 45 | /855. RY*( 1) C 46         | 1.39  | 2.03 |
| 105.036 | BD ( 1) C 44 - C 45 | /***. BD*( 1) C 43 - C 44  | 1.48  | 1.13 |
| 105.045 | BD ( 1) C 44 - C 45 | /***. BD*( 1) C 43 - H 75  | 2.55  | 0.99 |
| 105.040 | BD ( 1) C 44 - C 45 | /***. BD*( 1) C 45 - C 46  | 1.83  | 1.11 |
| 105.056 | BD ( 1) C 44 - C 45 | /***. BD*( 1) C 46 - C 49  | 4.03  | 0.96 |
| 106.055 | BD ( 2) C 44 - C 45 | /***. BD*( 2) C 41 - C 46  | 14.95 | 0.25 |
| 106.050 | BD ( 2) C 44 - C 45 | /***. BD*( 2) C 42 - C 43  | 13.20 | 0.24 |
| 107.046 | BD ( 1) C 44 - H 74 | /813. RY*( 1) C 43         | 1.42  | 1.88 |
| 107.046 | BD ( 1) C 44 - H 74 | /841. RY*( 1) C 45         | 1.43  | 1.87 |
| 107.021 | BD ( 1) C 44 - H 74 | /***. RY*( 1) H 73         | 0.52  | 1.07 |
| 107.021 | BD ( 1) C 44 - H 74 | /***. RY*( 1) H 75         | 0.52  | 1.07 |
| 107.058 | BD ( 1) C 44 - H 74 | /***. BD*( 1) C 42 - C 43  | 4.53  | 0.93 |
| 107.058 | BD ( 1) C 44 - H 74 | /***. BD*( 1) C 45 - C 46  | 4.55  | 0.93 |
| 108.036 | BD ( 1) C 45 - C 46 | /786. RY*( 1) C 41         | 0.83  | 1.92 |
| 108.037 | BD ( 1) C 45 - C 46 | /828. RY*( 2) C 44         | 0.95  | 1.82 |
| 108.033 | BD ( 1) C 45 - C 46 | /897. RY*( 1) C 49         | 0.76  | 1.74 |
| 108.061 | BD ( 1) C 45 - C 46 | /***. BD*( 1) N 11 - C 41  | 4.96  | 0.94 |
| 108.036 | BD ( 1) C 45 - C 46 | /***. BD*( 2) N 11 - C 41  | 0.80  | 1.63 |
| 108.043 | BD ( 1) C 45 - C 46 | /***. BD*( 1) C 41 - C 46  | 1.83  | 1.27 |
| 108.038 | BD ( 1) C 45 - C 46 | /***. BD*( 1) C 44 - C 45  | 1.60  | 1.12 |
| 108.045 | BD ( 1) C 45 - C 46 | /***. BD*( 1) C 44 - H 74  | 2.59  | 0.97 |
| 108.023 | BD ( 1) C 45 - C 46 | /***. BD*( 1) C 46 - C 49  | 0.69  | 0.95 |
| 108.028 | BD ( 1) C 45 - C 46 | /***. BD*( 1) C 49 - H 79  | 1.06  | 0.95 |
| 109.036 | BD ( 1) C 45 - H 73 | /827. RY*( 1) C 44         | 1.00  | 1.65 |
| 109.050 | BD ( 1) C 45 - H 73 | /855. RY*( 1) C 46         | 1.66  | 1.85 |
| 109.056 | BD ( 1) C 45 - H 73 | /***. BD*( 1) C 41 - C 46  | 3.56  | 1.10 |
| 109.054 | BD ( 1) C 45 - H 73 | /***. BD*( 1) C 43 - C 44  | 3.90  | 0.94 |
| 110.047 | BD ( 1) C 46 - C 49 | /786. RY*( 1) C 41         | 1.51  | 1.84 |
| 110.038 | BD ( 1) C 46 - C 49 | /841. RY*( 1) C 45         | 0.91  | 1.97 |
| 110.076 | BD ( 1) C 46 - C 49 | /***. BD*( 2) N 11 - C 41  | 3.66  | 1.55 |
| 110.040 | BD ( 1) C 46 - C 49 | /***. BD*( 1) C 41 - C 42  | 1.72  | 1.19 |
| 110.048 | BD ( 1) C 46 - C 49 | /***. BD*( 1) C 44 - C 45  | 2.79  | 1.04 |
| 110.025 | BD ( 1) C 46 - C 49 | /***. BD*( 1) C 45 - C 46  | 0.74  | 1.02 |
| 110.032 | BD ( 1) C 46 - C 49 | /***. BD*( 1) C 50 - H 129 | 1.43  | 0.87 |

|         |                      |                            |      |      |
|---------|----------------------|----------------------------|------|------|
| 110.032 | BD ( 1) C 46 - C 49  | /***. BD*( 1) C 58 - H 132 | 1.41 | 0.87 |
| 111.028 | BD ( 1) C 47 - C 48  | /801. RY*( 3) C 42         | 0.74 | 1.35 |
| 111.024 | BD ( 1) C 47 - C 48  | /***. RY*( 1) C 57         | 0.55 | 1.30 |
| 111.025 | BD ( 1) C 47 - C 48  | /***. BD*( 1) C 41 - C 42  | 0.66 | 1.16 |
| 111.026 | BD ( 1) C 47 - C 48  | /***. BD*( 1) C 42 - C 43  | 0.84 | 0.99 |
| 111.038 | BD ( 1) C 47 - C 48  | /***. BD*( 2) C 42 - C 43  | 2.95 | 0.53 |
| 111.034 | BD ( 1) C 47 - C 48  | /***. BD*( 1) C 57 - H 125 | 1.69 | 0.87 |
| 112.030 | BD ( 1) C 47 - C 57  | /800. RY*( 2) C 42         | 0.69 | 1.57 |
| 112.050 | BD ( 1) C 47 - C 57  | /***. BD*( 1) C 41 - C 42  | 2.74 | 1.16 |
| 112.017 | BD ( 1) C 47 - C 57  | /***. BD*( 2) C 42 - C 43  | 0.56 | 0.53 |
| 112.020 | BD ( 1) C 47 - C 57  | /***. BD*( 1) C 42 - C 47  | 0.59 | 0.86 |
| 112.034 | BD ( 1) C 47 - C 57  | /***. BD*( 1) C 48 - H 127 | 1.70 | 0.86 |
| 113.055 | BD ( 1) C 47 - H 80  | /***. BD*( 1) C 42 - C 43  | 4.35 | 0.88 |
| 113.020 | BD ( 1) C 47 - H 80  | /***. BD*( 2) C 42 - C 43  | 1.03 | 0.41 |
| 113.040 | BD ( 1) C 47 - H 80  | /***. BD*( 1) C 48 - H 128 | 2.74 | 0.73 |
| 113.042 | BD ( 1) C 47 - H 80  | /***. BD*( 1) C 57 - H 124 | 2.98 | 0.73 |
| 114.045 | BD ( 1) C 48 - H 126 | /***. BD*( 1) C 42 - C 47  | 3.29 | 0.76 |
| 115.041 | BD ( 1) C 48 - H 127 | /***. BD*( 1) C 47 - C 57  | 2.88 | 0.74 |
| 116.037 | BD ( 1) C 48 - H 128 | /***. BD*( 1) C 47 - H 80  | 2.16 | 0.78 |
| 117.029 | BD ( 1) C 49 - C 50  | /857. RY*( 3) C 46         | 0.81 | 1.27 |
| 117.039 | BD ( 1) C 49 - C 50  | /***. BD*( 1) C 41 - C 46  | 1.62 | 1.17 |
| 117.033 | BD ( 1) C 49 - C 50  | /***. BD*( 2) C 41 - C 46  | 1.97 | 0.56 |
| 117.019 | BD ( 1) C 49 - C 50  | /***. BD*( 1) C 46 - C 49  | 0.54 | 0.86 |
| 117.033 | BD ( 1) C 49 - C 50  | /***. BD*( 1) C 58 - H 133 | 1.57 | 0.88 |
| 118.041 | BD ( 1) C 49 - C 58  | /***. BD*( 1) C 41 - C 46  | 1.81 | 1.17 |
| 118.032 | BD ( 1) C 49 - C 58  | /***. BD*( 2) C 41 - C 46  | 1.89 | 0.56 |
| 118.020 | BD ( 1) C 49 - C 58  | /***. BD*( 1) C 46 - C 49  | 0.59 | 0.86 |
| 118.034 | BD ( 1) C 49 - C 58  | /***. BD*( 1) C 50 - H 131 | 1.64 | 0.86 |
| 119.059 | BD ( 1) C 49 - H 79  | /***. BD*( 1) C 45 - C 46  | 4.84 | 0.89 |
| 119.041 | BD ( 1) C 49 - H 79  | /***. BD*( 1) C 50 - H 130 | 2.77 | 0.74 |
| 119.041 | BD ( 1) C 49 - H 79  | /***. BD*( 1) C 58 - H 134 | 2.85 | 0.74 |
| 120.045 | BD ( 1) C 50 - H 129 | /***. BD*( 1) C 46 - C 49  | 3.33 | 0.76 |
| 121.037 | BD ( 1) C 50 - H 130 | /***. BD*( 1) C 49 - H 79  | 2.25 | 0.76 |
| 122.042 | BD ( 1) C 50 - H 131 | /***. BD*( 1) C 49 - C 58  | 3.10 | 0.73 |
| 123.030 | BD ( 1) C 51 - C 52  | /283. RY*( 2) C 5          | 0.72 | 1.50 |

|                           |                            |      |      |
|---------------------------|----------------------------|------|------|
| 123. BD ( 1) C 51 - C 52  | /***. BD*( 1) C 4 - C 5    | 2.27 | 0.99 |
| 0.043                     |                            |      |      |
| 123. BD ( 1) C 51 - C 52  | /***. BD*( 2) C 4 - C 5    | 2.17 | 0.54 |
| 0.034                     |                            |      |      |
| 123. BD ( 1) C 51 - C 52  | /***. BD*( 1) C 5 - C 51   | 0.54 | 0.86 |
| 0.019                     |                            |      |      |
| 123. BD ( 1) C 51 - C 52  | /***. BD*( 1) C 59 - H 113 | 1.58 | 0.88 |
| 0.033                     |                            |      |      |
| 124. BD ( 1) C 51 - C 59  | /284. RY*( 3) C 5          | 0.66 | 1.43 |
| 0.028                     |                            |      |      |
| 124. BD ( 1) C 51 - C 59  | /***. BD*( 1) C 4 - C 5    | 2.17 | 0.99 |
| 0.042                     |                            |      |      |
| 124. BD ( 1) C 51 - C 59  | /***. BD*( 2) C 4 - C 5    | 1.82 | 0.54 |
| 0.031                     |                            |      |      |
| 124. BD ( 1) C 51 - C 59  | /***. BD*( 1) C 5 - C 51   | 0.56 | 0.86 |
| 0.020                     |                            |      |      |
| 124. BD ( 1) C 51 - C 59  | /***. BD*( 1) C 52 - H 115 | 1.64 | 0.86 |
| 0.034                     |                            |      |      |
| 125. BD ( 1) C 51 - H 81  | /***. BD*( 1) C 5 - C 6    | 4.79 | 0.89 |
| 0.059                     |                            |      |      |
| 125. BD ( 1) C 51 - H 81  | /***. BD*( 1) C 52 - H 116 | 2.80 | 0.74 |
| 0.041                     |                            |      |      |
| 125. BD ( 1) C 51 - H 81  | /***. BD*( 1) C 59 - H 112 | 2.86 | 0.74 |
| 0.041                     |                            |      |      |
| 126. BD ( 1) C 52 - H 114 | /***. BD*( 1) C 5 - C 51   | 3.34 | 0.76 |
| 0.045                     |                            |      |      |
| 127. BD ( 1) C 52 - H 115 | /***. BD*( 1) C 51 - C 59  | 3.10 | 0.73 |
| 0.042                     |                            |      |      |
| 128. BD ( 1) C 52 - H 116 | /***. BD*( 1) C 51 - H 81  | 2.20 | 0.76 |
| 0.037                     |                            |      |      |
| 129. BD ( 1) C 53 - C 54  | /256. RY*( 3) C 3          | 0.83 | 1.31 |
| 0.030                     |                            |      |      |
| 129. BD ( 1) C 53 - C 54  | /***. BD*( 1) C 3 - C 4    | 0.99 | 0.98 |
| 0.028                     |                            |      |      |
| 129. BD ( 1) C 53 - C 54  | /***. BD*( 1) C 3 - C 8    | 0.75 | 1.00 |
| 0.024                     |                            |      |      |
| 129. BD ( 1) C 53 - C 54  | /***. BD*( 2) C 3 - C 8    | 3.10 | 0.53 |
| 0.039                     |                            |      |      |
| 129. BD ( 1) C 53 - C 54  | /***. BD*( 1) C 60 - H 121 | 1.64 | 0.88 |
| 0.034                     |                            |      |      |
| 130. BD ( 1) C 53 - C 60  | /255. RY*( 2) C 3          | 0.60 | 1.61 |
| 0.028                     |                            |      |      |
| 130. BD ( 1) C 53 - C 60  | /***. BD*( 1) C 3 - C 4    | 3.35 | 0.98 |
| 0.051                     |                            |      |      |
| 130. BD ( 1) C 53 - C 60  | /***. BD*( 2) C 3 - C 8    | 0.61 | 0.53 |
| 0.017                     |                            |      |      |
| 130. BD ( 1) C 53 - C 60  | /***. BD*( 1) C 3 - C 53   | 0.58 | 0.86 |
| 0.020                     |                            |      |      |
| 130. BD ( 1) C 53 - C 60  | /***. BD*( 1) C 54 - H 119 | 1.70 | 0.86 |
| 0.034                     |                            |      |      |
| 131. BD ( 1) C 53 - H 82  | /***. BD*( 1) C 3 - C 8    | 4.57 | 0.88 |
| 0.057                     |                            |      |      |
| 131. BD ( 1) C 53 - H 82  | /***. BD*( 2) C 3 - C 8    | 0.73 | 0.41 |
| 0.017                     |                            |      |      |
| 131. BD ( 1) C 53 - H 82  | /***. BD*( 1) C 54 - H 118 | 2.77 | 0.73 |
| 0.040                     |                            |      |      |
| 131. BD ( 1) C 53 - H 82  | /***. BD*( 1) C 60 - H 122 | 3.02 | 0.73 |
| 0.042                     |                            |      |      |
| 132. BD ( 1) C 54 - H 117 | /***. BD*( 1) C 3 - C 53   | 3.24 | 0.76 |
| 0.045                     |                            |      |      |
| 133. BD ( 1) C 54 - H 118 | /***. BD*( 1) C 53 - H 82  | 2.18 | 0.78 |
| 0.037                     |                            |      |      |
| 134. BD ( 1) C 54 - H 119 | /***. BD*( 1) C 53 - C 60  | 2.89 | 0.74 |
| 0.041                     |                            |      |      |
| 135. BD ( 1) C 55 - H 108 | /***. BD*( 1) C 32 - C 37  | 3.43 | 0.75 |
| 0.045                     |                            |      |      |
| 136. BD ( 1) C 55 - H 109 | /***. BD*( 1) C 37 - H 85  | 2.31 | 0.75 |
| 0.037                     |                            |      |      |
| 137. BD ( 1) C 55 - H 110 | /***. BD*( 1) C 37 - C 38  | 3.25 | 0.71 |
| 0.043                     |                            |      |      |

|                                    |                           |      |       |
|------------------------------------|---------------------------|------|-------|
| 138. BD ( 1) C 56 - H 102<br>0.046 | /***. BD*( 1) C 36 - C 39 | 3.52 | 0.75  |
| 139. BD ( 1) C 56 - H 103<br>0.043 | /***. BD*( 1) C 39 - C 40 | 3.30 | 0.71  |
| 140. BD ( 1) C 56 - H 104<br>0.036 | /***. BD*( 1) C 39 - H 86 | 2.23 | 0.75  |
| 141. BD ( 1) C 57 - H 123<br>0.048 | /***. BD*( 1) C 42 - C 47 | 3.78 | 0.75  |
| 142. BD ( 1) C 57 - H 124<br>0.035 | /***. BD*( 1) C 47 - H 80 | 1.97 | 0.78  |
| 143. BD ( 1) C 57 - H 125<br>0.042 | /***. BD*( 1) C 47 - C 48 | 3.13 | 0.71  |
| 144. BD ( 1) C 58 - H 132<br>0.046 | /***. BD*( 1) C 46 - C 49 | 3.44 | 0.76  |
| 145. BD ( 1) C 58 - H 133<br>0.043 | /***. BD*( 1) C 49 - C 50 | 3.21 | 0.72  |
| 146. BD ( 1) C 58 - H 134<br>0.037 | /***. BD*( 1) C 49 - H 79 | 2.23 | 0.76  |
| 147. BD ( 1) C 59 - H 111<br>0.046 | /***. BD*( 1) C 5 - C 51  | 3.53 | 0.76  |
| 148. BD ( 1) C 59 - H 112<br>0.037 | /***. BD*( 1) C 51 - H 81 | 2.24 | 0.76  |
| 149. BD ( 1) C 59 - H 113<br>0.043 | /***. BD*( 1) C 51 - C 52 | 3.22 | 0.72  |
| 150. BD ( 1) C 60 - H 120<br>0.049 | /***. BD*( 1) C 3 - C 53  | 3.92 | 0.75  |
| 151. BD ( 1) C 60 - H 121<br>0.043 | /***. BD*( 1) C 53 - C 54 | 3.21 | 0.71  |
| 152. BD ( 1) C 60 - H 122<br>0.036 | /***. BD*( 1) C 53 - H 82 | 2.04 | 0.77  |
| 153. BD ( 1) C 61 - H 96<br>0.046  | /***. BD*( 1) C 26 - C 29 | 3.47 | 0.76  |
| 154. BD ( 1) C 61 - H 97<br>0.043  | /***. BD*( 1) C 29 - C 30 | 3.24 | 0.71  |
| 155. BD ( 1) C 61 - H 98<br>0.037  | /***. BD*( 1) C 29 - H 83 | 2.28 | 0.75  |
| 156. BD ( 1) C 62 - H 87<br>0.048  | /***. BD*( 1) C 22 - C 27 | 3.74 | 0.75  |
| 157. BD ( 1) C 62 - H 88<br>0.036  | /***. BD*( 1) C 27 - H 84 | 2.19 | 0.75  |
| 158. BD ( 1) C 62 - H 89<br>0.043  | /***. BD*( 1) C 27 - C 28 | 3.25 | 0.70  |
| 159. CR ( 1) C 1<br>0.079          | /243. RY*( 4) O 2         | 0.75 | 10.46 |
| 159. CR ( 1) C 1<br>0.087          | /***. BD*( 1) C 1 - O 2   | 0.91 | 10.26 |
| 159. CR ( 1) C 1<br>0.084          | /***. BD*( 1) C 1 - B 14  | 0.83 | 10.08 |
| 159. CR ( 1) C 1<br>0.127          | /***. BD*( 1) C 1 - B 15  | 1.91 | 10.20 |
| 159. CR ( 1) C 1<br>0.065          | /***. BD*( 1) C 10 - B 14 | 0.52 | 10.18 |
| 159. CR ( 1) C 1<br>0.128          | /***. BD*( 1) B 15 - C 16 | 1.96 | 10.15 |
| 160. CR ( 1) O 2<br>0.284          | /226. RY*( 1) C 1         | 5.15 | 19.43 |
| 160. CR ( 1) O 2<br>0.117          | /***. BD*( 1) C 1 - B 14  | 0.87 | 18.75 |
| 160. CR ( 1) O 2<br>0.128          | /***. BD*( 1) C 1 - B 15  | 1.06 | 18.87 |
| 161. CR ( 1) C 3<br>0.095          | /270. RY*( 3) C 4         | 1.03 | 10.87 |
| 161. CR ( 1) C 3<br>0.094          | /325. RY*( 2) C 8         | 1.04 | 10.72 |
| 161. CR ( 1) C 3<br>0.084          | /***. BD*( 1) C 4 - C 5   | 0.86 | 10.19 |
| 161. CR ( 1) C 3<br>0.083          | /***. BD*( 1) C 4 - N 9   | 0.84 | 10.04 |
| 161. CR ( 1) C 3<br>0.069          | /***. BD*( 1) C 7 - C 8   | 0.58 | 10.22 |



|                           |                          |      |       |
|---------------------------|--------------------------|------|-------|
| 162. CR ( 1) C 4<br>0.084 | /254. RY*( 1) C 3        | 0.80 | 11.13 |
| 162. CR ( 1) C 4<br>0.077 | /255. RY*( 2) C 3        | 0.68 | 10.86 |
| 162. CR ( 1) C 4<br>0.091 | /282. RY*( 1) C 5        | 0.93 | 11.18 |
| 162. CR ( 1) C 4<br>0.065 | /***. BD*( 1) C 3 - C 4  | 0.51 | 10.23 |
| 162. CR ( 1) C 4<br>0.078 | /***. BD*( 1) C 3 - C 53 | 0.74 | 10.11 |
| 162. CR ( 1) C 4<br>0.065 | /***. BD*( 1) C 4 - C 5  | 0.50 | 10.23 |
| 162. CR ( 1) C 4<br>0.075 | /***. BD*( 1) C 4 - N 9  | 0.68 | 10.08 |
| 162. CR ( 1) C 4<br>0.064 | /***. BD*( 1) C 5 - C 6  | 0.50 | 10.24 |
| 162. CR ( 1) C 4<br>0.081 | /***. BD*( 1) C 5 - C 51 | 0.80 | 10.10 |
| 162. CR ( 1) C 4<br>0.089 | /***. BD*( 1) N 9 - C 10 | 0.97 | 10.12 |
| 162. CR ( 1) C 4<br>0.077 | /***. BD*( 1) N 9 - C 13 | 0.72 | 10.12 |
| 163. CR ( 1) C 5<br>0.098 | /270. RY*( 3) C 4        | 1.11 | 10.88 |
| 163. CR ( 1) C 5<br>0.108 | /297. RY*( 2) C 6        | 1.34 | 10.85 |
| 163. CR ( 1) C 5<br>0.083 | /926. RY*( 2) C 51       | 0.77 | 11.25 |
| 163. CR ( 1) C 5<br>0.083 | /***. BD*( 1) C 3 - C 4  | 0.84 | 10.20 |
| 163. CR ( 1) C 5<br>0.083 | /***. BD*( 1) C 4 - N 9  | 0.84 | 10.05 |
| 163. CR ( 1) C 5<br>0.067 | /***. BD*( 1) C 6 - C 7  | 0.55 | 10.23 |
| 164. CR ( 1) C 6<br>0.094 | /283. RY*( 2) C 5        | 1.03 | 10.69 |
| 164. CR ( 1) C 6<br>0.087 | /284. RY*( 3) C 5        | 0.89 | 10.62 |
| 164. CR ( 1) C 6<br>0.116 | /311. RY*( 2) C 7        | 1.54 | 10.93 |
| 164. CR ( 1) C 6<br>0.069 | /***. RY*( 2) H 78       | 0.50 | 11.96 |
| 164. CR ( 1) C 6<br>0.067 | /***. BD*( 1) C 4 - C 5  | 0.55 | 10.19 |
| 164. CR ( 1) C 6<br>0.077 | /***. BD*( 1) C 5 - C 51 | 0.74 | 10.05 |
| 164. CR ( 1) C 6<br>0.067 | /***. BD*( 1) C 7 - C 8  | 0.55 | 10.22 |
| 165. CR ( 1) C 7<br>0.102 | /297. RY*( 2) C 6        | 1.20 | 10.84 |
| 165. CR ( 1) C 7<br>0.089 | /325. RY*( 2) C 8        | 0.93 | 10.72 |
| 165. CR ( 1) C 7<br>0.073 | /***. BD*( 1) C 3 - C 8  | 0.65 | 10.21 |
| 165. CR ( 1) C 7<br>0.073 | /***. BD*( 1) C 5 - C 6  | 0.64 | 10.20 |
| 166. CR ( 1) C 8<br>0.121 | /255. RY*( 2) C 3        | 1.68 | 10.81 |
| 166. CR ( 1) C 8<br>0.111 | /311. RY*( 2) C 7        | 1.43 | 10.93 |
| 166. CR ( 1) C 8<br>0.067 | /***. BD*( 1) C 3 - C 4  | 0.54 | 10.18 |
| 166. CR ( 1) C 8<br>0.078 | /***. BD*( 1) C 3 - C 53 | 0.76 | 10.06 |
| 166. CR ( 1) C 8<br>0.068 | /***. BD*( 1) C 6 - C 7  | 0.56 | 10.21 |
| 167. CR ( 1) N 9<br>0.097 | /268. RY*( 1) C 4        | 0.78 | 15.21 |
| 167. CR ( 1) N 9<br>0.106 | /396. RY*( 3) C 13       | 0.94 | 14.91 |

|                   |                           |      |       |
|-------------------|---------------------------|------|-------|
| 167. CR ( 1) N 9  | /***. BD*( 1) C 10 - B 14 | 0.65 | 14.29 |
| 0.086             |                           |      |       |
| 168. CR ( 1) C 10 | /408. RY*( 1) B 14        | 1.11 | 11.31 |
| 0.100             |                           |      |       |
| 168. CR ( 1) C 10 | /411. RY*( 4) B 14        | 0.74 | 11.01 |
| 0.081             |                           |      |       |
| 168. CR ( 1) C 10 | /***. BD*( 1) C 4 - N 9   | 1.23 | 10.10 |
| 0.100             |                           |      |       |
| 168. CR ( 1) C 10 | /***. BD*( 1) N 9 - C 13  | 0.53 | 10.14 |
| 0.066             |                           |      |       |
| 168. CR ( 1) C 10 | /***. BD*( 1) C 10 - B 14 | 1.85 | 10.23 |
| 0.124             |                           |      |       |
| 168. CR ( 1) C 10 | /***. BD*( 1) N 11 - C 12 | 0.52 | 10.13 |
| 0.065             |                           |      |       |
| 168. CR ( 1) C 10 | /***. BD*( 1) N 11 - C 41 | 1.29 | 10.10 |
| 0.103             |                           |      |       |
| 168. CR ( 1) C 10 | /***. BD*( 1) B 14 - B 15 | 1.98 | 10.28 |
| 0.129             |                           |      |       |
| 169. CR ( 1) N 11 | /354. RY*( 3) C 10        | 0.93 | 15.53 |
| 0.107             |                           |      |       |
| 169. CR ( 1) N 11 | /382. RY*( 3) C 12        | 0.81 | 14.93 |
| 0.098             |                           |      |       |
| 169. CR ( 1) N 11 | /786. RY*( 1) C 41        | 0.71 | 15.15 |
| 0.093             |                           |      |       |
| 169. CR ( 1) N 11 | /***. BD*( 1) C 10 - B 14 | 0.69 | 14.29 |
| 0.089             |                           |      |       |
| 170. CR ( 1) C 12 | /368. RY*( 3) N 11        | 0.72 | 10.86 |
| 0.079             |                           |      |       |
| 170. CR ( 1) C 12 | /395. RY*( 2) C 13        | 1.07 | 11.10 |
| 0.097             |                           |      |       |
| 170. CR ( 1) C 12 | /396. RY*( 3) C 13        | 0.98 | 10.84 |
| 0.092             |                           |      |       |
| 170. CR ( 1) C 12 | /***. RY*( 1) H 71        | 0.57 | 11.57 |
| 0.073             |                           |      |       |
| 170. CR ( 1) C 12 | /***. BD*( 1) C 10 - N 11 | 0.69 | 10.12 |
| 0.075             |                           |      |       |
| 170. CR ( 1) C 12 | /***. BD*( 1) N 11 - C 41 | 1.11 | 10.08 |
| 0.095             |                           |      |       |
| 170. CR ( 1) C 12 | /***. BD*( 1) C 12 - C 13 | 1.15 | 10.28 |
| 0.097             |                           |      |       |
| 170. CR ( 1) C 12 | /***. BD*( 1) C 13 - H 72 | 1.05 | 10.11 |
| 0.092             |                           |      |       |
| 171. CR ( 1) C 13 | /340. RY*( 3) N 9         | 0.74 | 10.84 |
| 0.080             |                           |      |       |
| 171. CR ( 1) C 13 | /381. RY*( 2) C 12        | 1.05 | 11.11 |
| 0.096             |                           |      |       |
| 171. CR ( 1) C 13 | /382. RY*( 3) C 12        | 1.08 | 10.84 |
| 0.097             |                           |      |       |
| 171. CR ( 1) C 13 | /***. RY*( 1) H 72        | 0.56 | 11.54 |
| 0.072             |                           |      |       |
| 171. CR ( 1) C 13 | /***. BD*( 1) C 4 - N 9   | 1.14 | 10.08 |
| 0.097             |                           |      |       |
| 171. CR ( 1) C 13 | /***. BD*( 1) N 9 - C 10  | 0.68 | 10.12 |
| 0.075             |                           |      |       |
| 171. CR ( 1) C 13 | /***. BD*( 1) C 12 - C 13 | 1.15 | 10.28 |
| 0.097             |                           |      |       |
| 171. CR ( 1) C 13 | /***. BD*( 1) C 12 - H 71 | 1.05 | 10.11 |
| 0.092             |                           |      |       |
| 172. CR ( 1) B 14 | /352. RY*( 1) C 10        | 0.77 | 7.97  |
| 0.070             |                           |      |       |
| 172. CR ( 1) B 14 | /422. RY*( 1) B 15        | 1.28 | 7.95  |
| 0.090             |                           |      |       |
| 172. CR ( 1) B 14 | /***. BD*( 1) C 1 - O 2   | 1.80 | 6.84  |
| 0.100             |                           |      |       |
| 172. CR ( 1) B 14 | /***. BD*( 1) C 1 - B 14  | 0.95 | 6.66  |
| 0.073             |                           |      |       |
| 172. CR ( 1) B 14 | /***. BD*( 1) C 1 - B 15  | 1.43 | 6.77  |
| 0.089             |                           |      |       |
| 172. CR ( 1) B 14 | /***. BD*( 1) N 9 - C 10  | 1.39 | 6.67  |
| 0.087             |                           |      |       |

|                            |                           |      |       |
|----------------------------|---------------------------|------|-------|
| 172. CR ( 1) B 14<br>0.091 | /***. BD*( 1) C 10 - N 11 | 1.54 | 6.67  |
| 172. CR ( 1) B 14<br>0.081 | /***. BD*( 1) B 14 - B 15 | 1.20 | 6.81  |
| 172. CR ( 1) B 14<br>0.156 | /***. BD*( 1) B 15 - C 16 | 4.41 | 6.73  |
| 173. CR ( 1) B 15<br>0.084 | /226. RY*( 1) C 1         | 1.19 | 7.33  |
| 173. CR ( 1) B 15<br>0.102 | /408. RY*( 1) B 14        | 1.65 | 7.83  |
| 173. CR ( 1) B 15<br>0.077 | /436. RY*( 1) C 16        | 0.90 | 8.13  |
| 173. CR ( 1) B 15<br>0.159 | /***. BD*( 1) C 1 - O 2   | 4.53 | 6.83  |
| 173. CR ( 1) B 15<br>0.084 | /***. BD*( 1) C 1 - B 14  | 1.25 | 6.65  |
| 173. CR ( 1) B 15<br>0.067 | /***. BD*( 1) C 1 - B 15  | 0.80 | 6.76  |
| 173. CR ( 1) B 15<br>0.155 | /***. BD*( 1) C 10 - B 14 | 4.41 | 6.75  |
| 173. CR ( 1) B 15<br>0.084 | /***. BD*( 1) B 14 - B 15 | 1.28 | 6.80  |
| 173. CR ( 1) B 15<br>0.082 | /***. BD*( 1) C 16 - N 17 | 1.24 | 6.67  |
| 173. CR ( 1) B 15<br>0.095 | /***. BD*( 1) C 16 - N 20 | 1.67 | 6.67  |
| 174. CR ( 1) C 16<br>0.076 | /423. RY*( 2) B 15        | 0.64 | 11.17 |
| 174. CR ( 1) C 16<br>0.068 | /452. RY*( 3) N 17        | 0.55 | 10.76 |
| 174. CR ( 1) C 16<br>0.106 | /***. BD*( 1) B 14 - B 15 | 1.35 | 10.29 |
| 174. CR ( 1) C 16<br>0.115 | /***. BD*( 1) B 15 - C 16 | 1.58 | 10.22 |
| 174. CR ( 1) C 16<br>0.068 | /***. BD*( 1) N 17 - C 18 | 0.57 | 10.14 |
| 174. CR ( 1) C 16<br>0.104 | /***. BD*( 1) N 17 - C 21 | 1.31 | 10.10 |
| 174. CR ( 1) C 16<br>0.068 | /***. BD*( 1) C 19 - N 20 | 0.56 | 10.14 |
| 174. CR ( 1) C 16<br>0.104 | /***. BD*( 1) N 20 - C 31 | 1.32 | 10.10 |
| 175. CR ( 1) N 17<br>0.112 | /439. RY*( 4) C 16        | 1.01 | 15.39 |
| 175. CR ( 1) N 17<br>0.108 | /466. RY*( 3) C 18        | 0.97 | 14.98 |
| 175. CR ( 1) N 17<br>0.091 | /506. RY*( 1) C 21        | 0.68 | 15.13 |
| 175. CR ( 1) N 17<br>0.084 | /***. BD*( 1) B 15 - C 16 | 0.60 | 14.28 |
| 176. CR ( 1) C 18<br>0.085 | /452. RY*( 3) N 17        | 0.85 | 10.75 |
| 176. CR ( 1) C 18<br>0.096 | /479. RY*( 2) C 19        | 1.03 | 11.08 |
| 176. CR ( 1) C 18<br>0.091 | /480. RY*( 3) C 19        | 0.96 | 10.88 |
| 176. CR ( 1) C 18<br>0.073 | /***. RY*( 1) H 63        | 0.58 | 11.59 |
| 176. CR ( 1) C 18<br>0.078 | /***. BD*( 1) C 16 - N 17 | 0.74 | 10.15 |
| 176. CR ( 1) C 18<br>0.098 | /***. BD*( 1) N 17 - C 21 | 1.17 | 10.08 |
| 176. CR ( 1) C 18<br>0.092 | /***. BD*( 1) C 18 - C 19 | 1.03 | 10.27 |
| 176. CR ( 1) C 18<br>0.090 | /***. BD*( 1) C 19 - H 64 | 1.01 | 10.11 |
| 177. CR ( 1) C 19<br>0.098 | /465. RY*( 2) C 18        | 1.09 | 11.13 |
| 177. CR ( 1) C 19<br>0.089 | /466. RY*( 3) C 18        | 0.91 | 10.91 |

|                            |                           |      |       |
|----------------------------|---------------------------|------|-------|
| 177. CR ( 1) C 19<br>0.083 | /494. RY*( 3) N 20        | 0.80 | 10.83 |
| 177. CR ( 1) C 19<br>0.072 | /***. RY*( 1) H 64        | 0.56 | 11.56 |
| 177. CR ( 1) C 19<br>0.078 | /***. BD*( 1) C 16 - N 20 | 0.73 | 10.15 |
| 177. CR ( 1) C 19<br>0.093 | /***. BD*( 1) C 18 - C 19 | 1.04 | 10.27 |
| 177. CR ( 1) C 19<br>0.090 | /***. BD*( 1) C 18 - H 63 | 1.00 | 10.11 |
| 177. CR ( 1) C 19<br>0.096 | /***. BD*( 1) N 20 - C 31 | 1.12 | 10.08 |
| 178. CR ( 1) N 20<br>0.104 | /480. RY*( 3) C 19        | 0.90 | 14.96 |
| 178. CR ( 1) N 20<br>0.093 | /646. RY*( 1) C 31        | 0.71 | 15.18 |
| 178. CR ( 1) N 20<br>0.086 | /***. BD*( 1) B 15 - C 16 | 0.63 | 14.28 |
| 179. CR ( 1) C 21<br>0.085 | /520. RY*( 1) C 22        | 0.82 | 11.07 |
| 179. CR ( 1) C 21<br>0.066 | /522. RY*( 3) C 22        | 0.51 | 10.75 |
| 179. CR ( 1) C 21<br>0.094 | /576. RY*( 1) C 26        | 0.99 | 11.18 |
| 179. CR ( 1) C 21<br>0.092 | /***. BD*( 1) C 16 - N 17 | 1.03 | 10.13 |
| 179. CR ( 1) C 21<br>0.075 | /***. BD*( 1) N 17 - C 18 | 0.69 | 10.11 |
| 179. CR ( 1) C 21<br>0.080 | /***. BD*( 1) N 17 - C 21 | 0.79 | 10.07 |
| 179. CR ( 1) C 21<br>0.067 | /***. BD*( 1) C 21 - C 22 | 0.53 | 10.23 |
| 179. CR ( 1) C 21<br>0.067 | /***. BD*( 1) C 21 - C 26 | 0.54 | 10.23 |
| 179. CR ( 1) C 21<br>0.079 | /***. BD*( 1) C 22 - C 27 | 0.77 | 10.11 |
| 179. CR ( 1) C 21<br>0.082 | /***. BD*( 1) C 26 - C 29 | 0.83 | 10.10 |
| 180. CR ( 1) C 22<br>0.088 | /508. RY*( 3) C 21        | 0.91 | 10.72 |
| 180. CR ( 1) C 22<br>0.083 | /535. RY*( 2) C 23        | 0.82 | 10.59 |
| 180. CR ( 1) C 22<br>0.072 | /536. RY*( 3) C 23        | 0.61 | 10.58 |
| 180. CR ( 1) C 22<br>0.067 | /592. RY*( 3) C 27        | 0.50 | 11.24 |
| 180. CR ( 1) C 22<br>0.085 | /***. BD*( 1) N 17 - C 21 | 0.88 | 10.03 |
| 180. CR ( 1) C 22<br>0.085 | /***. BD*( 1) C 21 - C 26 | 0.88 | 10.19 |
| 180. CR ( 1) C 22<br>0.068 | /***. BD*( 1) C 23 - C 24 | 0.57 | 10.23 |
| 181. CR ( 1) C 23<br>0.118 | /522. RY*( 3) C 22        | 1.62 | 10.69 |
| 181. CR ( 1) C 23<br>0.110 | /549. RY*( 2) C 24        | 1.40 | 10.93 |
| 181. CR ( 1) C 23<br>0.069 | /***. RY*( 2) H 67        | 0.50 | 11.95 |
| 181. CR ( 1) C 23<br>0.068 | /***. BD*( 1) C 21 - C 22 | 0.55 | 10.18 |
| 181. CR ( 1) C 23<br>0.080 | /***. BD*( 1) C 22 - C 27 | 0.78 | 10.06 |
| 181. CR ( 1) C 23<br>0.068 | /***. BD*( 1) C 24 - C 25 | 0.56 | 10.21 |
| 182. CR ( 1) C 24<br>0.080 | /535. RY*( 2) C 23        | 0.76 | 10.58 |
| 182. CR ( 1) C 24<br>0.102 | /563. RY*( 2) C 25        | 1.20 | 10.83 |
| 182. CR ( 1) C 24<br>0.074 | /***. BD*( 1) C 22 - C 23 | 0.66 | 10.21 |

|                            |                           |      |       |
|----------------------------|---------------------------|------|-------|
| 182. CR ( 1) C 24<br>0.073 | /***. BD*( 1) C 25 - C 26 | 0.64 | 10.20 |
| 183. CR ( 1) C 25<br>0.117 | /549. RY*( 2) C 24        | 1.56 | 10.93 |
| 183. CR ( 1) C 25<br>0.115 | /578. RY*( 3) C 26        | 1.54 | 10.79 |
| 183. CR ( 1) C 25<br>0.068 | /***. BD*( 1) C 21 - C 26 | 0.56 | 10.18 |
| 183. CR ( 1) C 25<br>0.066 | /***. BD*( 1) C 23 - C 24 | 0.53 | 10.22 |
| 183. CR ( 1) C 25<br>0.078 | /***. BD*( 1) C 26 - C 29 | 0.75 | 10.05 |
| 184. CR ( 1) C 26<br>0.096 | /508. RY*( 3) C 21        | 1.09 | 10.72 |
| 184. CR ( 1) C 26<br>0.107 | /563. RY*( 2) C 25        | 1.33 | 10.84 |
| 184. CR ( 1) C 26<br>0.083 | /619. RY*( 2) C 29        | 0.76 | 11.31 |
| 184. CR ( 1) C 26<br>0.083 | /***. BD*( 1) N 17 - C 21 | 0.85 | 10.03 |
| 184. CR ( 1) C 26<br>0.085 | /***. BD*( 1) C 21 - C 22 | 0.87 | 10.20 |
| 184. CR ( 1) C 26<br>0.067 | /***. BD*( 1) C 24 - C 25 | 0.55 | 10.23 |
| 185. CR ( 1) C 27<br>0.090 | /520. RY*( 1) C 22        | 0.92 | 11.04 |
| 185. CR ( 1) C 27<br>0.076 | /606. RY*( 3) C 28        | 0.67 | 10.88 |
| 185. CR ( 1) C 27<br>0.077 | /***. RY*( 3) C 62        | 0.68 | 10.82 |
| 185. CR ( 1) C 27<br>0.072 | /***. BD*( 1) C 21 - C 22 | 0.62 | 10.20 |
| 185. CR ( 1) C 27<br>0.067 | /***. BD*( 1) C 22 - C 23 | 0.55 | 10.22 |
| 186. CR ( 1) C 28<br>0.071 | /591. RY*( 2) C 27        | 0.58 | 10.75 |
| 186. CR ( 1) C 28<br>0.072 | /594. RY*( 5) C 27        | 0.58 | 11.19 |
| 187. CR ( 1) C 29<br>0.087 | /576. RY*( 1) C 26        | 0.86 | 11.15 |
| 187. CR ( 1) C 29<br>0.077 | /634. RY*( 3) C 30        | 0.69 | 10.78 |
| 187. CR ( 1) C 29<br>0.074 | /***. RY*( 3) C 61        | 0.64 | 10.56 |
| 187. CR ( 1) C 29<br>0.073 | /***. BD*( 1) C 21 - C 26 | 0.65 | 10.21 |
| 187. CR ( 1) C 29<br>0.064 | /***. BD*( 1) C 25 - C 26 | 0.50 | 10.22 |
| 188. CR ( 1) C 30<br>0.069 | /620. RY*( 3) C 29        | 0.55 | 10.77 |
| 188. CR ( 1) C 30<br>0.074 | /***. RY*( 2) H 93        | 0.59 | 11.53 |
| 189. CR ( 1) C 31<br>0.090 | /660. RY*( 1) C 32        | 0.91 | 11.19 |
| 189. CR ( 1) C 31<br>0.093 | /716. RY*( 1) C 36        | 0.97 | 11.17 |
| 189. CR ( 1) C 31<br>0.092 | /***. BD*( 1) C 16 - N 20 | 1.03 | 10.14 |
| 189. CR ( 1) C 31<br>0.074 | /***. BD*( 1) C 19 - N 20 | 0.67 | 10.11 |
| 189. CR ( 1) C 31<br>0.077 | /***. BD*( 1) N 20 - C 31 | 0.73 | 10.07 |
| 189. CR ( 1) C 31<br>0.065 | /***. BD*( 1) C 31 - C 32 | 0.51 | 10.23 |
| 189. CR ( 1) C 31<br>0.067 | /***. BD*( 1) C 31 - C 36 | 0.54 | 10.24 |
| 189. CR ( 1) C 31<br>0.080 | /***. BD*( 1) C 32 - C 37 | 0.79 | 10.10 |
| 189. CR ( 1) C 31<br>0.080 | /***. BD*( 1) C 36 - C 39 | 0.78 | 10.11 |

|                            |                           |      |       |
|----------------------------|---------------------------|------|-------|
| 190. CR ( 1) C 32<br>0.098 | /648. RY*( 3) C 31        | 1.11 | 10.84 |
| 190. CR ( 1) C 32<br>0.090 | /675. RY*( 2) C 33        | 0.94 | 10.67 |
| 190. CR ( 1) C 32<br>0.080 | /731. RY*( 2) C 37        | 0.72 | 11.30 |
| 190. CR ( 1) C 32<br>0.083 | /***. BD*( 1) N 20 - C 31 | 0.84 | 10.04 |
| 190. CR ( 1) C 32<br>0.084 | /***. BD*( 1) C 31 - C 36 | 0.86 | 10.20 |
| 190. CR ( 1) C 32<br>0.068 | /***. BD*( 1) C 33 - C 34 | 0.56 | 10.23 |
| 191. CR ( 1) C 33<br>0.090 | /661. RY*( 2) C 32        | 0.94 | 10.66 |
| 191. CR ( 1) C 33<br>0.087 | /662. RY*( 3) C 32        | 0.90 | 10.61 |
| 191. CR ( 1) C 33<br>0.114 | /689. RY*( 2) C 34        | 1.49 | 10.93 |
| 191. CR ( 1) C 33<br>0.070 | /***. RY*( 2) H 70        | 0.51 | 11.96 |
| 191. CR ( 1) C 33<br>0.066 | /***. BD*( 1) C 31 - C 32 | 0.53 | 10.18 |
| 191. CR ( 1) C 33<br>0.079 | /***. BD*( 1) C 32 - C 37 | 0.76 | 10.05 |
| 191. CR ( 1) C 33<br>0.068 | /***. BD*( 1) C 34 - C 35 | 0.56 | 10.22 |
| 192. CR ( 1) C 34<br>0.083 | /675. RY*( 2) C 33        | 0.82 | 10.67 |
| 192. CR ( 1) C 34<br>0.102 | /703. RY*( 2) C 35        | 1.21 | 10.82 |
| 192. CR ( 1) C 34<br>0.072 | /***. BD*( 1) C 32 - C 33 | 0.64 | 10.20 |
| 192. CR ( 1) C 34<br>0.073 | /***. BD*( 1) C 35 - C 36 | 0.64 | 10.20 |
| 193. CR ( 1) C 35<br>0.114 | /689. RY*( 2) C 34        | 1.48 | 10.93 |
| 193. CR ( 1) C 35<br>0.121 | /717. RY*( 2) C 36        | 1.70 | 10.85 |
| 193. CR ( 1) C 35<br>0.067 | /***. BD*( 1) C 31 - C 36 | 0.54 | 10.19 |
| 193. CR ( 1) C 35<br>0.067 | /***. BD*( 1) C 33 - C 34 | 0.55 | 10.21 |
| 193. CR ( 1) C 35<br>0.078 | /***. BD*( 1) C 36 - C 39 | 0.75 | 10.06 |
| 194. CR ( 1) C 36<br>0.096 | /648. RY*( 3) C 31        | 1.07 | 10.84 |
| 194. CR ( 1) C 36<br>0.108 | /703. RY*( 2) C 35        | 1.35 | 10.83 |
| 194. CR ( 1) C 36<br>0.076 | /759. RY*( 2) C 39        | 0.65 | 11.31 |
| 194. CR ( 1) C 36<br>0.083 | /***. BD*( 1) N 20 - C 31 | 0.85 | 10.04 |
| 194. CR ( 1) C 36<br>0.085 | /***. BD*( 1) C 31 - C 32 | 0.87 | 10.19 |
| 194. CR ( 1) C 36<br>0.068 | /***. BD*( 1) C 34 - C 35 | 0.56 | 10.23 |
| 195. CR ( 1) C 37<br>0.088 | /660. RY*( 1) C 32        | 0.86 | 11.16 |
| 195. CR ( 1) C 37<br>0.080 | /746. RY*( 3) C 38        | 0.74 | 10.80 |
| 195. CR ( 1) C 37<br>0.074 | /983. RY*( 3) C 55        | 0.65 | 10.67 |
| 195. CR ( 1) C 37<br>0.071 | /***. BD*( 1) C 31 - C 32 | 0.62 | 10.20 |
| 195. CR ( 1) C 37<br>0.066 | /***. BD*( 1) C 32 - C 33 | 0.53 | 10.22 |
| 196. CR ( 1) C 38<br>0.074 | /***. RY*( 2) H 105       | 0.60 | 11.52 |
| 197. CR ( 1) C 39<br>0.088 | /716. RY*( 1) C 36        | 0.87 | 11.14 |

|                            |                           |      |       |
|----------------------------|---------------------------|------|-------|
| 197. CR ( 1) C 39<br>0.077 | /774. RY*( 3) C 40        | 0.69 | 10.85 |
| 197. CR ( 1) C 39<br>0.076 | /997. RY*( 3) C 56        | 0.69 | 10.60 |
| 197. CR ( 1) C 39<br>0.072 | /***. BD*( 1) C 31 - C 36 | 0.63 | 10.20 |
| 197. CR ( 1) C 39<br>0.067 | /***. BD*( 1) C 35 - C 36 | 0.54 | 10.22 |
| 198. CR ( 1) C 40<br>0.074 | /***. RY*( 2) H 99        | 0.59 | 11.54 |
| 198. CR ( 1) C 40<br>0.068 | /***. RY*( 2) H 101       | 0.50 | 11.66 |
| 199. CR ( 1) C 41<br>0.080 | /799. RY*( 1) C 42        | 0.72 | 11.15 |
| 199. CR ( 1) C 41<br>0.080 | /800. RY*( 2) C 42        | 0.74 | 10.83 |
| 199. CR ( 1) C 41<br>0.091 | /855. RY*( 1) C 46        | 0.93 | 11.17 |
| 199. CR ( 1) C 41<br>0.070 | /856. RY*( 2) C 46        | 0.57 | 10.91 |
| 199. CR ( 1) C 41<br>0.092 | /***. BD*( 1) C 10 - N 11 | 1.02 | 10.12 |
| 199. CR ( 1) C 41<br>0.074 | /***. BD*( 1) N 11 - C 12 | 0.66 | 10.12 |
| 199. CR ( 1) C 41<br>0.076 | /***. BD*( 1) N 11 - C 41 | 0.70 | 10.08 |
| 199. CR ( 1) C 41<br>0.078 | /***. BD*( 1) C 42 - C 47 | 0.74 | 10.11 |
| 199. CR ( 1) C 41<br>0.065 | /***. BD*( 1) C 45 - C 46 | 0.52 | 10.25 |
| 199. CR ( 1) C 41<br>0.081 | /***. BD*( 1) C 46 - C 49 | 0.81 | 10.10 |
| 200. CR ( 1) C 42<br>0.094 | /788. RY*( 3) C 41        | 0.99 | 11.20 |
| 200. CR ( 1) C 42<br>0.069 | /814. RY*( 2) C 43        | 0.57 | 10.48 |
| 200. CR ( 1) C 42<br>0.082 | /815. RY*( 3) C 43        | 0.78 | 10.63 |
| 200. CR ( 1) C 42<br>0.073 | /870. RY*( 2) C 47        | 0.62 | 10.86 |
| 200. CR ( 1) C 42<br>0.081 | /***. BD*( 1) N 11 - C 41 | 0.80 | 10.04 |
| 200. CR ( 1) C 42<br>0.239 | /***. BD*( 2) N 11 - C 41 | 5.16 | 10.73 |
| 200. CR ( 1) C 42<br>0.069 | /***. BD*( 1) C 43 - C 44 | 0.59 | 10.22 |
| 201. CR ( 1) C 43<br>0.112 | /800. RY*( 2) C 42        | 1.47 | 10.78 |
| 201. CR ( 1) C 43<br>0.112 | /828. RY*( 2) C 44        | 1.43 | 10.92 |
| 201. CR ( 1) C 43<br>0.072 | /***. RY*( 2) H 75        | 0.55 | 11.95 |
| 201. CR ( 1) C 43<br>0.077 | /***. BD*( 1) C 42 - C 47 | 0.74 | 10.06 |
| 201. CR ( 1) C 43<br>0.068 | /***. BD*( 1) C 44 - C 45 | 0.56 | 10.21 |
| 202. CR ( 1) C 44<br>0.085 | /815. RY*( 3) C 43        | 0.86 | 10.63 |
| 202. CR ( 1) C 44<br>0.102 | /842. RY*( 2) C 45        | 1.22 | 10.84 |
| 202. CR ( 1) C 44<br>0.073 | /***. BD*( 1) C 42 - C 43 | 0.66 | 10.21 |
| 202. CR ( 1) C 44<br>0.073 | /***. BD*( 1) C 45 - C 46 | 0.65 | 10.20 |
| 203. CR ( 1) C 45<br>0.116 | /828. RY*( 2) C 44        | 1.55 | 10.92 |
| 203. CR ( 1) C 45<br>0.127 | /856. RY*( 2) C 46        | 1.86 | 10.86 |
| 203. CR ( 1) C 45<br>0.067 | /***. BD*( 1) C 43 - C 44 | 0.55 | 10.22 |

|               |              |                           |      |       |
|---------------|--------------|---------------------------|------|-------|
| 203.<br>0.077 | CR ( 1) C 45 | /***. BD*( 1) C 46 - C 49 | 0.73 | 10.05 |
| 204.<br>0.096 | CR ( 1) C 46 | /788. RY*( 3) C 41        | 1.04 | 11.21 |
| 204.<br>0.107 | CR ( 1) C 46 | /842. RY*( 2) C 45        | 1.33 | 10.85 |
| 204.<br>0.084 | CR ( 1) C 46 | /898. RY*( 2) C 49        | 0.79 | 11.24 |
| 204.<br>0.085 | CR ( 1) C 46 | /***. BD*( 1) N 11 - C 41 | 0.89 | 10.05 |
| 204.<br>0.235 | CR ( 1) C 46 | /***. BD*( 2) N 11 - C 41 | 4.99 | 10.74 |
| 204.<br>0.068 | CR ( 1) C 46 | /***. BD*( 1) C 44 - C 45 | 0.56 | 10.23 |
| 205.<br>0.091 | CR ( 1) C 47 | /799. RY*( 1) C 42        | 0.93 | 11.10 |
| 205.<br>0.074 | CR ( 1) C 47 | /885. RY*( 3) C 48        | 0.64 | 10.83 |
| 205.<br>0.075 | CR ( 1) C 47 | /***. RY*( 3) C 57        | 0.65 | 10.84 |
| 205.<br>0.067 | CR ( 1) C 47 | /***. BD*( 1) C 41 - C 42 | 0.53 | 10.37 |
| 205.<br>0.068 | CR ( 1) C 47 | /***. BD*( 1) C 42 - C 43 | 0.56 | 10.21 |
| 206.<br>0.072 | CR ( 1) C 48 | /871. RY*( 3) C 47        | 0.61 | 10.79 |
| 207.<br>0.088 | CR ( 1) C 49 | /855. RY*( 1) C 46        | 0.88 | 11.14 |
| 207.<br>0.074 | CR ( 1) C 49 | /913. RY*( 3) C 50        | 0.64 | 10.79 |
| 207.<br>0.075 | CR ( 1) C 49 | /***. RY*( 3) C 58        | 0.66 | 10.58 |
| 207.<br>0.068 | CR ( 1) C 49 | /***. BD*( 1) C 41 - C 46 | 0.56 | 10.39 |
| 207.<br>0.065 | CR ( 1) C 49 | /***. BD*( 1) C 45 - C 46 | 0.52 | 10.22 |
| 208.<br>0.073 | CR ( 1) C 50 | /***. RY*( 2) H 129       | 0.58 | 11.55 |
| 209.<br>0.087 | CR ( 1) C 51 | /282. RY*( 1) C 5         | 0.86 | 11.15 |
| 209.<br>0.076 | CR ( 1) C 51 | /941. RY*( 3) C 52        | 0.67 | 10.78 |
| 209.<br>0.069 | CR ( 1) C 51 | /***. RY*( 3) C 59        | 0.56 | 10.62 |
| 209.<br>0.072 | CR ( 1) C 51 | /***. BD*( 1) C 4 - C 5   | 0.63 | 10.21 |
| 209.<br>0.065 | CR ( 1) C 51 | /***. BD*( 1) C 5 - C 6   | 0.51 | 10.22 |
| 210.<br>0.078 | CR ( 1) C 52 | /927. RY*( 3) C 51        | 0.72 | 10.71 |
| 210.<br>0.074 | CR ( 1) C 52 | /***. RY*( 2) H 114       | 0.59 | 11.53 |
| 211.<br>0.090 | CR ( 1) C 53 | /254. RY*( 1) C 3         | 0.92 | 11.09 |
| 211.<br>0.075 | CR ( 1) C 53 | /969. RY*( 3) C 54        | 0.65 | 10.86 |
| 211.<br>0.080 | CR ( 1) C 53 | /***. RY*( 3) C 60        | 0.73 | 10.86 |
| 211.<br>0.071 | CR ( 1) C 53 | /***. BD*( 1) C 3 - C 4   | 0.61 | 10.19 |
| 211.<br>0.069 | CR ( 1) C 53 | /***. BD*( 1) C 3 - C 8   | 0.58 | 10.21 |
| 212.<br>0.069 | CR ( 1) C 54 | /955. RY*( 3) C 53        | 0.55 | 10.90 |
| 213.<br>0.078 | CR ( 1) C 55 | /732. RY*( 3) C 37        | 0.72 | 10.77 |
| 214.<br>0.083 | CR ( 1) C 56 | /760. RY*( 3) C 39        | 0.81 | 10.82 |
| 215.<br>0.070 | CR ( 1) C 57 | /870. RY*( 2) C 47        | 0.57 | 10.84 |



|                            |                           |        |       |
|----------------------------|---------------------------|--------|-------|
| 216. CR ( 1) C 58<br>0.072 | /899. RY*( 3) C 49        | 0.60   | 10.70 |
| 216. CR ( 1) C 58<br>0.076 | /***. RY*( 2) H 133       | 0.60   | 12.10 |
| 217. CR ( 1) C 59<br>0.068 | /927. RY*( 3) C 51        | 0.54   | 10.71 |
| 217. CR ( 1) C 59<br>0.071 | /***. RY*( 3) H 111       | 0.55   | 11.53 |
| 218. CR ( 1) C 60<br>0.078 | /954. RY*( 2) C 53        | 0.71   | 10.82 |
| 218. CR ( 1) C 60<br>0.077 | /***. RY*( 2) H 121       | 0.61   | 12.11 |
| 219. CR ( 1) C 61<br>0.075 | /620. RY*( 3) C 29        | 0.66   | 10.76 |
| 219. CR ( 1) C 61<br>0.075 | /***. RY*( 2) H 97        | 0.58   | 12.14 |
| 221. LP ( 1) O 2<br>0.131  | /226. RY*( 1) C 1         | 13.44  | 1.59  |
| 221. LP ( 1) O 2<br>0.045  | /232. RY*( 7) C 1         | 0.82   | 2.98  |
| 221. LP ( 1) O 2<br>0.049  | /***. BD*( 1) C 1 - B 14  | 3.25   | 0.91  |
| 221. LP ( 1) O 2<br>0.070  | /***. BD*( 1) C 1 - B 15  | 5.86   | 1.02  |
| 222. LP ( 2) O 2<br>0.060  | /228. RY*( 3) C 1         | 1.64   | 2.41  |
| 222. LP ( 2) O 2<br>0.028  | /230. RY*( 5) C 1         | 0.82   | 1.06  |
| 222. LP ( 2) O 2<br>0.089  | /***. BD*( 1) C 1 - B 14  | 18.75  | 0.49  |
| 222. LP ( 2) O 2<br>0.070  | /***. BD*( 1) C 1 - B 15  | 9.06   | 0.61  |
| 222. LP ( 2) O 2<br>0.017  | /***. BD*( 1) C 47 - H 80 | 0.61   | 0.51  |
| 223. LP*( 1) B 14<br>0.046 | /410. RY*( 3) B 14        | 1.20   | 0.65  |
| 223. LP*( 1) B 14<br>0.050 | /417. RY*( 10) B 14       | 0.54   | 1.70  |
| 223. LP*( 1) B 14<br>0.068 | /***. BD*( 2) C 1 - O 2   | 237.18 | 0.01  |
| 223. LP*( 1) B 14<br>0.020 | /***. BD*( 1) C 1 - B 14  | 0.60   | 0.30  |
| 223. LP*( 1) B 14<br>0.084 | /***. BD*( 1) N 9 - C 10  | 8.70   | 0.32  |
| 223. LP*( 1) B 14<br>0.082 | /***. BD*( 1) C 10 - N 11 | 8.35   | 0.32  |
| 223. LP*( 1) B 14<br>0.027 | /***. BD*( 1) B 14 - B 15 | 0.63   | 0.46  |
| 224. LP ( 1) B 15<br>0.052 | /227. RY*( 2) C 1         | 0.62   | 2.04  |
| 224. LP ( 1) B 15<br>0.040 | /424. RY*( 3) B 15        | 0.96   | 0.79  |
| 224. LP ( 1) B 15<br>0.090 | /***. BD*( 2) C 1 - O 2   | 438.96 | 0.01  |
| 224. LP ( 1) B 15<br>0.022 | /***. BD*( 1) C 16 - N 17 | 0.76   | 0.33  |
| 224. LP ( 1) B 15<br>0.033 | /***. BD*( 1) C 16 - N 20 | 1.68   | 0.33  |
| 225. LP ( 1) N 20<br>0.040 | /441. RY*( 6) C 16        | 0.80   | 1.89  |
| 225. LP ( 1) N 20<br>0.048 | /478. RY*( 1) C 19        | 2.66   | 0.85  |
| 225. LP ( 1) N 20<br>0.035 | /648. RY*( 3) C 31        | 0.90   | 1.34  |
| 225. LP ( 1) N 20<br>0.090 | /***. BD*( 2) C 16 - N 17 | 50.02  | 0.19  |
| 225. LP ( 1) N 20<br>0.071 | /***. BD*( 2) C 18 - C 19 | 26.50  | 0.22  |
| 225. LP ( 1) N 20<br>0.061 | /***. BD*( 1) C 31 - C 32 | 5.29   | 0.69  |

|       |                          |                            |       |      |
|-------|--------------------------|----------------------------|-------|------|
| 225.  | LP ( 1) N 20             | /***. BD*( 1) C 31 - C 36  | 5.28  | 0.70 |
| 0.061 | ***. BD*( 2) C 1 - O 2   | /227. RY*( 2) C 1          | 2.63  | 2.02 |
| 0.132 | ***. BD*( 2) C 1 - O 2   | /231. RY*( 6) C 1          | 1.61  | 0.54 |
| 0.054 | ***. BD*( 2) C 1 - O 2   | /241. RY*( 2) O 2          | 2.79  | 0.74 |
| 0.083 | ***. BD*( 2) C 1 - O 2   | /247. RY*( 8) O 2          | 0.52  | 2.94 |
| 0.071 | ***. BD*( 1) C 1 - B 14  | /411. RY*( 4) B 14         | 0.70  | 0.88 |
| 0.094 | ***. BD*( 1) C 1 - B 14  | /***. BD*( 1) C 1 - O 2    | 0.72  | 0.18 |
| 0.037 | ***. BD*( 1) C 1 - B 14  | /***. BD*( 1) C 10 - N 11  | 1.07  | 0.01 |
| 0.012 | ***. BD*( 1) C 1 - B 14  | /***. BD*( 1) B 14 - B 15  | 3.51  | 0.15 |
| 0.075 | ***. BD*( 1) C 1 - B 14  | /***. BD*( 1) C 16 - N 20  | 0.65  | 0.02 |
| 0.011 | ***. BD*( 1) C 1 - B 14  | /***. BD*( 1) C 47 - H 80  | 0.53  | 0.02 |
| 0.012 | ***. BD*( 1) C 1 - B 14  | /***. BD*( 1) C 55 - H 110 | 0.57  | 0.01 |
| 0.010 | ***. BD*( 1) C 1 - B 14  | /***. BD*( 1) C 58 - H 133 | 0.58  | 0.01 |
| 0.010 | ***. BD*( 2) C 3 - C 8   | /326. RY*( 3) C 8          | 1.18  | 0.71 |
| 0.063 | ***. BD*( 2) C 3 - C 8   | /***. BD*( 1) C 53 - C 54  | 1.65  | 0.28 |
| 0.046 | ***. BD*( 2) C 3 - C 8   | /***. BD*( 1) C 53 - C 60  | 0.62  | 0.30 |
| 0.029 | ***. BD*( 2) C 4 - C 5   | /223. LP*( 1) B 14         | 3.85  | 0.02 |
| 0.011 | ***. BD*( 2) C 4 - C 5   | /269. RY*( 2) C 4          | 0.57  | 0.74 |
| 0.042 | ***. BD*( 2) C 4 - C 5   | /298. RY*( 3) C 6          | 0.64  | 0.53 |
| 0.038 | ***. BD*( 2) C 4 - C 5   | /***. BD*( 1) N 9 - C 10   | 1.57  | 0.34 |
| 0.045 | ***. BD*( 2) C 4 - C 5   | /***. BD*( 1) N 9 - C 13   | 1.46  | 0.33 |
| 0.044 | ***. BD*( 2) C 4 - C 5   | /***. BD*( 1) C 51 - C 52  | 1.35  | 0.27 |
| 0.039 | ***. BD*( 2) C 4 - C 5   | /***. BD*( 1) C 51 - C 59  | 1.38  | 0.28 |
| 0.040 | ***. BD*( 2) C 6 - C 7   | /298. RY*( 3) C 6          | 0.97  | 0.54 |
| 0.050 | ***. BD*( 2) C 6 - C 7   | /312. RY*( 3) C 7          | 1.84  | 0.54 |
| 0.069 | ***. BD*( 2) N 9 - C 10  | /223. LP*( 1) B 14         | 0.85  | 0.07 |
| 0.009 | ***. BD*( 2) N 9 - C 10  | /353. RY*( 2) C 10         | 2.17  | 1.51 |
| 0.085 | ***. BD*( 2) N 9 - C 10  | /355. RY*( 4) C 10         | 0.79  | 1.63 |
| 0.053 | ***. BD*( 2) N 9 - C 10  | /***. BD*( 1) C 1 - B 14   | 6.21  | 0.38 |
| 0.067 | ***. BD*( 2) N 9 - C 10  | /***. BD*( 1) C 3 - C 4    | 1.04  | 0.50 |
| 0.033 | ***. BD*( 2) N 9 - C 10  | /***. BD*( 1) C 4 - C 5    | 1.34  | 0.50 |
| 0.038 | ***. BD*( 2) N 9 - C 10  | /***. BD*( 2) C 12 - C 13  | 23.04 | 0.03 |
| 0.035 | ***. BD*( 2) N 9 - C 10  | /***. BD*( 1) B 14 - B 15  | 1.29  | 0.53 |
| 0.038 | ***. BD*( 2) N 11 - C 41 | /226. RY*( 1) C 1          | 0.68  | 0.02 |
| 0.006 | ***. BD*( 2) N 11 - C 41 | /257. RY*( 4) C 3          | 0.86  | 0.04 |
| 0.011 |                          |                            |       |      |

|       |                          |                     |        |      |
|-------|--------------------------|---------------------|--------|------|
| 0.082 | ***. BD*( 2) N 11 - C 41 | /372. RY*( 7) N 11  | 1.35   | 1.41 |
| 0.017 | ***. BD*( 2) N 11 - C 41 | /409. RY*( 2) B 14  | 0.63   | 0.13 |
| 0.025 | ***. BD*( 2) N 11 - C 41 | /411. RY*( 4) B 14  | 0.85   | 0.22 |
| 0.291 | ***. BD*( 2) N 11 - C 41 | /788. RY*( 3) C 41  | 51.35  | 0.47 |
| 0.211 | ***. BD*( 2) N 11 - C 41 | /789. RY*( 4) C 41  | 20.91  | 0.61 |
| 0.094 | ***. BD*( 2) N 11 - C 41 | /790. RY*( 5) C 41  | 3.41   | 0.74 |
| 0.143 | ***. BD*( 2) N 11 - C 41 | /792. RY*( 7) C 41  | 9.88   | 0.59 |
| 0.092 | ***. BD*( 2) N 11 - C 41 | /793. RY*( 8) C 41  | 3.99   | 0.61 |
| 0.489 | ***. BD*( 2) N 11 - C 41 | /794. RY*( 9) C 41  | 85.13  | 0.80 |
| 0.028 | ***. BD*( 2) N 11 - C 41 | /799. RY*( 1) C 42  | 0.60   | 0.37 |
| 0.066 | ***. BD*( 2) N 11 - C 41 | /800. RY*( 2) C 42  | 21.69  | 0.06 |
| 0.088 | ***. BD*( 2) N 11 - C 41 | /802. RY*( 4) C 42  | 132.45 | 0.02 |
| 0.098 | ***. BD*( 2) N 11 - C 41 | /805. RY*( 7) C 42  | 3.22   | 0.85 |
| 0.052 | ***. BD*( 2) N 11 - C 41 | /808. RY*( 10) C 42 | 0.56   | 1.40 |
| 0.135 | ***. BD*( 2) N 11 - C 41 | /809. RY*( 11) C 42 | 3.94   | 1.33 |
| 0.084 | ***. BD*( 2) N 11 - C 41 | /811. RY*( 13) C 42 | 1.44   | 1.40 |
| 0.037 | ***. BD*( 2) N 11 - C 41 | /813. RY*( 1) C 43  | 0.94   | 0.43 |
| 0.061 | ***. BD*( 2) N 11 - C 41 | /816. RY*( 4) C 43  | 3.35   | 0.32 |
| 0.046 | ***. BD*( 2) N 11 - C 41 | /819. RY*( 7) C 43  | 0.78   | 0.76 |
| 0.051 | ***. BD*( 2) N 11 - C 41 | /824. RY*( 12) C 43 | 0.69   | 1.06 |
| 0.038 | ***. BD*( 2) N 11 - C 41 | /828. RY*( 2) C 44  | 2.11   | 0.19 |
| 0.070 | ***. BD*( 2) N 11 - C 41 | /832. RY*( 6) C 44  | 0.98   | 1.42 |
| 0.017 | ***. BD*( 2) N 11 - C 41 | /835. RY*( 9) C 44  | 0.79   | 0.11 |
| 0.043 | ***. BD*( 2) N 11 - C 41 | /842. RY*( 2) C 45  | 4.76   | 0.11 |
| 0.062 | ***. BD*( 2) N 11 - C 41 | /844. RY*( 4) C 45  | 3.37   | 0.32 |
| 0.042 | ***. BD*( 2) N 11 - C 41 | /848. RY*( 8) C 45  | 0.80   | 0.62 |
| 0.031 | ***. BD*( 2) N 11 - C 41 | /850. RY*( 10) C 45 | 0.57   | 0.48 |
| 0.061 | ***. BD*( 2) N 11 - C 41 | /853. RY*( 13) C 45 | 0.70   | 1.53 |
| 0.068 | ***. BD*( 2) N 11 - C 41 | /855. RY*( 1) C 46  | 3.36   | 0.40 |
| 0.066 | ***. BD*( 2) N 11 - C 41 | /856. RY*( 2) C 46  | 9.01   | 0.14 |
| 0.043 | ***. BD*( 2) N 11 - C 41 | /860. RY*( 6) C 46  | 0.67   | 0.77 |
| 0.054 | ***. BD*( 2) N 11 - C 41 | /861. RY*( 7) C 46  | 1.05   | 0.78 |
| 0.048 | ***. BD*( 2) N 11 - C 41 | /864. RY*( 10) C 46 | 0.57   | 1.18 |
| 0.119 | ***. BD*( 2) N 11 - C 41 | /865. RY*( 11) C 46 | 2.79   | 1.45 |
| 0.054 | ***. BD*( 2) N 11 - C 41 | /866. RY*( 12) C 46 | 1.40   | 0.58 |

|       |                           |                            |       |      |
|-------|---------------------------|----------------------------|-------|------|
| 0.110 | ***. BD* ( 2) N 11 - C 41 | /867. RY* ( 13) C 46       | 2.37  | 1.45 |
| 0.026 | ***. BD* ( 2) N 11 - C 41 | /869. RY* ( 1) C 47        | 3.62  | 0.06 |
| 0.046 | ***. BD* ( 2) N 11 - C 41 | /870. RY* ( 2) C 47        | 4.69  | 0.13 |
| 0.017 | ***. BD* ( 2) N 11 - C 41 | /871. RY* ( 3) C 47        | 1.04  | 0.08 |
| 0.038 | ***. BD* ( 2) N 11 - C 41 | /890. RY* ( 8) C 48        | 0.51  | 0.79 |
| 0.027 | ***. BD* ( 2) N 11 - C 41 | /897. RY* ( 1) C 49        | 1.81  | 0.12 |
| 0.043 | ***. BD* ( 2) N 11 - C 41 | /898. RY* ( 2) C 49        | 1.02  | 0.51 |
| 0.021 | ***. BD* ( 2) N 11 - C 41 | /902. RY* ( 6) C 49        | 0.63  | 0.19 |
| 0.056 | ***. BD* ( 2) N 11 - C 41 | /903. RY* ( 7) C 49        | 0.88  | 1.02 |
| 0.057 | ***. BD* ( 2) N 11 - C 41 | /907. RY* ( 11) C 49       | 0.99  | 0.94 |
| 0.015 | ***. BD* ( 2) N 11 - C 41 | /913. RY* ( 3) C 50        | 1.46  | 0.04 |
| 0.031 | ***. BD* ( 2) N 11 - C 41 | /***. RY* ( 8) C 58        | 0.71  | 0.38 |
| 0.019 | ***. BD* ( 2) N 11 - C 41 | /***. RY* ( 1) H 127       | 1.27  | 0.09 |
| 0.074 | ***. BD* ( 2) C 12 - C 13 | /384. RY* ( 5) C 12        | 0.54  | 1.78 |
| 0.073 | ***. BD* ( 2) C 12 - C 13 | /398. RY* ( 5) C 13        | 0.53  | 1.78 |
| 0.011 | ***. BD* ( 2) C 16 - N 17 | /223. LP* ( 1) B 14        | 1.11  | 0.09 |
| 0.083 | ***. BD* ( 2) C 16 - N 17 | /224. LP ( 1) B 15         | 68.17 | 0.09 |
| 0.074 | ***. BD* ( 2) C 16 - N 17 | /437. RY* ( 2) C 16        | 1.61  | 1.30 |
| 0.063 | ***. BD* ( 2) C 16 - N 17 | /438. RY* ( 3) C 16        | 1.00  | 1.51 |
| 0.037 | ***. BD* ( 2) C 16 - N 17 | /***. BD* ( 2) C 18 - C 19 | 28.64 | 0.03 |
| 0.035 | ***. BD* ( 2) C 16 - N 17 | /***. BD* ( 1) C 21 - C 22 | 0.95  | 0.51 |
| 0.037 | ***. BD* ( 2) C 16 - N 17 | /***. BD* ( 1) C 21 - C 26 | 1.10  | 0.51 |
| 0.072 | ***. BD* ( 2) C 18 - C 19 | /468. RY* ( 5) C 18        | 0.53  | 1.77 |
| 0.072 | ***. BD* ( 2) C 18 - C 19 | /482. RY* ( 5) C 19        | 0.51  | 1.77 |
| 0.042 | ***. BD* ( 2) C 21 - C 26 | /507. RY* ( 2) C 21        | 0.58  | 0.75 |
| 0.038 | ***. BD* ( 2) C 21 - C 26 | /564. RY* ( 3) C 25        | 0.63  | 0.56 |
| 0.044 | ***. BD* ( 2) C 21 - C 26 | /***. BD* ( 1) C 16 - N 17 | 1.55  | 0.35 |
| 0.043 | ***. BD* ( 2) C 21 - C 26 | /***. BD* ( 1) N 17 - C 18 | 1.48  | 0.33 |
| 0.039 | ***. BD* ( 2) C 21 - C 26 | /***. BD* ( 1) C 29 - C 30 | 1.41  | 0.27 |
| 0.040 | ***. BD* ( 2) C 21 - C 26 | /***. BD* ( 1) C 29 - C 61 | 1.42  | 0.28 |
| 0.058 | ***. BD* ( 2) C 22 - C 23 | /536. RY* ( 3) C 23        | 0.84  | 0.83 |
| 0.045 | ***. BD* ( 2) C 22 - C 23 | /***. BD* ( 1) C 27 - C 28 | 1.64  | 0.27 |
| 0.028 | ***. BD* ( 2) C 22 - C 23 | /***. BD* ( 1) C 27 - C 62 | 0.59  | 0.29 |
| 0.074 | ***. BD* ( 2) C 24 - C 25 | /550. RY* ( 3) C 24        | 2.03  | 0.57 |
| 0.051 | ***. BD* ( 2) C 24 - C 25 | /564. RY* ( 3) C 25        | 0.98  | 0.57 |

|       |                           |                            |        |      |
|-------|---------------------------|----------------------------|--------|------|
| 0.043 | ***. BD* ( 2) C 31 - C 36 | /647. RY* ( 2) C 31        | 0.60   | 0.74 |
| 0.036 | ***. BD* ( 2) C 31 - C 36 | /704. RY* ( 3) C 35        | 0.52   | 0.58 |
| 0.044 | ***. BD* ( 2) C 31 - C 36 | /***. BD* ( 1) C 16 - N 20 | 1.49   | 0.35 |
| 0.043 | ***. BD* ( 2) C 31 - C 36 | /***. BD* ( 1) C 19 - N 20 | 1.42   | 0.33 |
| 0.041 | ***. BD* ( 2) C 31 - C 36 | /***. BD* ( 1) C 39 - C 40 | 1.46   | 0.28 |
| 0.037 | ***. BD* ( 2) C 31 - C 36 | /***. BD* ( 1) C 39 - C 56 | 1.16   | 0.29 |
| 0.061 | ***. BD* ( 2) C 32 - C 33 | /676. RY* ( 3) C 33        | 1.07   | 0.73 |
| 0.038 | ***. BD* ( 2) C 32 - C 33 | /***. BD* ( 1) C 37 - C 38 | 1.17   | 0.28 |
| 0.044 | ***. BD* ( 2) C 32 - C 33 | /***. BD* ( 1) C 37 - C 55 | 1.56   | 0.28 |
| 0.074 | ***. BD* ( 2) C 34 - C 35 | /690. RY* ( 3) C 34        | 1.89   | 0.60 |
| 0.054 | ***. BD* ( 2) C 34 - C 35 | /704. RY* ( 3) C 35        | 1.03   | 0.59 |
| 0.054 | ***. BD* ( 2) C 41 - C 46 | /787. RY* ( 2) C 41        | 0.90   | 0.76 |
| 0.061 | ***. BD* ( 2) C 41 - C 46 | /788. RY* ( 3) C 41        | 0.61   | 1.44 |
| 0.037 | ***. BD* ( 2) C 41 - C 46 | /843. RY* ( 3) C 45        | 0.66   | 0.50 |
| 0.045 | ***. BD* ( 2) C 41 - C 46 | /***. BD* ( 1) C 10 - N 11 | 1.64   | 0.32 |
| 0.044 | ***. BD* ( 2) C 41 - C 46 | /***. BD* ( 1) N 11 - C 12 | 1.52   | 0.31 |
| 0.134 | ***. BD* ( 2) C 41 - C 46 | /***. BD* ( 2) N 11 - C 41 | 9.60   | 0.97 |
| 0.060 | ***. BD* ( 2) C 41 - C 46 | /***. BD* ( 1) C 41 - C 42 | 1.49   | 0.61 |
| 0.057 | ***. BD* ( 2) C 41 - C 46 | /***. BD* ( 1) C 41 - C 46 | 1.33   | 0.61 |
| 0.039 | ***. BD* ( 2) C 41 - C 46 | /***. BD* ( 1) C 49 - C 50 | 1.48   | 0.26 |
| 0.038 | ***. BD* ( 2) C 41 - C 46 | /***. BD* ( 1) C 49 - C 58 | 1.38   | 0.26 |
| 0.054 | ***. BD* ( 2) C 42 - C 43 | /814. RY* ( 2) C 43        | 0.84   | 0.73 |
| 0.046 | ***. BD* ( 2) C 42 - C 43 | /815. RY* ( 3) C 43        | 0.50   | 0.89 |
| 0.068 | ***. BD* ( 2) C 42 - C 43 | /***. BD* ( 2) C 41 - C 46 | 154.33 | 0.01 |
| 0.046 | ***. BD* ( 2) C 42 - C 43 | /***. BD* ( 1) C 47 - C 48 | 1.65   | 0.28 |
| 0.027 | ***. BD* ( 2) C 42 - C 43 | /***. BD* ( 1) C 47 - C 57 | 0.53   | 0.29 |
| 0.072 | ***. BD* ( 2) C 44 - C 45 | /829. RY* ( 3) C 44        | 1.93   | 0.57 |
| 0.050 | ***. BD* ( 2) C 44 - C 45 | /843. RY* ( 3) C 45        | 1.01   | 0.52 |
| 0.069 | ***. BD* ( 2) C 44 - C 45 | /***. BD* ( 2) C 41 - C 46 | 94.77  | 0.02 |

Natural Bond Orbitals (Summary):

| NBO                            | Occupancy | Energy   | Principal Delocalizations<br>(geminal,vicinal,remote)       |
|--------------------------------|-----------|----------|-------------------------------------------------------------|
| =====                          |           |          |                                                             |
| Molecular unit 1 (C55H72B2N4O) |           |          |                                                             |
| 1. BD ( 1) C 1 - O 2           | 1.99525   | -0.90192 | 1456 (g), 1455 (g), 226 (g)<br>422 (v)                      |
| 2. BD ( 2) C 1 - O 2           | 1.98559   | -0.25985 | 224 (v), 223 (v), 1454 (g)                                  |
| 3. BD ( 1) C 1 - B 14          | 1.68991   | -0.31855 | 1485 (v), 1473 (v), 1456 (g)<br>1484 (g), 1455 (g), 240 (v) |

|     |    |       |   |        |    |         |                                                                                                                                                                                                                    |
|-----|----|-------|---|--------|----|---------|--------------------------------------------------------------------------------------------------------------------------------------------------------------------------------------------------------------------|
| 4.  | BD | ( 1 ) | C | 1 - B  | 15 | 1.86978 | 242 (v) , 224 (v) , 1472 (v) , 229 (g)<br>-0.40234 1476 (v) , 1455 (g) , 1488 (v)<br>1484 (g) , 1485 (g) , 223 (v)<br>1453 (g) , 240 (v) , 242 (v) , 430 (g)<br>436 (v) , 1456 (g) , 1487 (v)<br>413 (v) , 433 (g) |
| 5.  | BD | ( 1 ) | C | 3 - C  | 4  | 1.96959 | -0.62652 1465 (v) , 1471 (v) , 1461 (g)<br>1474 (v) , 1472 (v) , 1458 (g)<br>1582 (v) , 1473 (v) , 338 (v)<br>283 (v) , 1460 (g)                                                                                   |
| 6.  | BD | ( 1 ) | C | 3 - C  | 8  | 1.97359 | -0.62621 1463 (v) , 1470 (v) , 1469 (g)<br>1457 (g) , 311 (v) , 268 (v)<br>1583 (v) , 1460 (g) , 953 (v)                                                                                                           |
| 7.  | BD | ( 2 ) | C | 3 - C  | 8  | 1.63548 | -0.21626 1467 (v) , 1462 (v) , 1581 (v)<br>312 (v) , 1582 (v) , 1583 (v)                                                                                                                                           |
| 8.  | BD | ( 1 ) | C | 3 - C  | 53 | 1.96975 | -0.54124 1461 (v) , 1469 (v) , 268 (v)<br>1584 (v) , 1602 (v) , 324 (v)<br>1458 (g) , 1457 (g)                                                                                                                     |
| 9.  | BD | ( 1 ) | C | 4 - C  | 5  | 1.96881 | -0.63017 1460 (v) , 1468 (v) , 1457 (g)<br>1472 (v) , 1464 (g) , 1473 (v)<br>255 (v) , 338 (v) , 1474 (v)<br>1576 (v) , 1465 (g) , 1575 (v)<br>297 (v)                                                             |
| 10. | BD | ( 2 ) | C | 4 - C  | 5  | 1.66564 | -0.22340 1459 (v) , 1467 (v) , 1472 (v)<br>1474 (v) , 1576 (v) , 1575 (v)<br>298 (v)                                                                                                                               |
| 11. | BD | ( 1 ) | C | 4 - N  | 9  | 1.98185 | -0.70909 1458 (v) , 1464 (v) , 1475 (v)<br>1480 (v) , 1472 (g) , 352 (v)<br>254 (v) , 395 (v) , 1457 (g) , 282 (v)<br>1474 (g) , 1461 (g)                                                                          |
| 12. | BD | ( 1 ) | C | 5 - C  | 6  | 1.97300 | -0.62857 1463 (v) , 1470 (v) , 1466 (g)<br>1461 (g) , 1577 (v) , 311 (v)<br>268 (v) , 925 (v) , 1465 (g)                                                                                                           |
| 13. | BD | ( 1 ) | C | 5 - C  | 51 | 1.96978 | -0.55083 1457 (v) , 1466 (v) , 268 (v)<br>1578 (v) , 1599 (v) , 296 (v)<br>1461 (g) , 1464 (g)                                                                                                                     |
| 14. | BD | ( 1 ) | C | 6 - C  | 7  | 1.98099 | -0.63543 1465 (v) , 1471 (v) , 1464 (g)<br>1469 (g) , 282 (v) , 325 (v) , 324 (v)                                                                                                                                  |
| 15. | BD | ( 2 ) | C | 6 - C  | 7  | 1.67366 | -0.22235 1462 (v) , 1459 (v)                                                                                                                                                                                       |
| 16. | BD | ( 1 ) | C | 6 - H  | 78 | 1.97545 | -0.45586 1461 (v) , 1469 (v) , 282 (v)<br>310 (v)                                                                                                                                                                  |
| 17. | BD | ( 1 ) | C | 7 - C  | 8  | 1.98085 | -0.63266 1460 (v) , 1468 (v) , 1458 (g)<br>1466 (g) , 254 (v) , 297 (v)                                                                                                                                            |
| 18. | BD | ( 1 ) | C | 7 - H  | 77 | 1.97757 | -0.45528 1458 (v) , 1464 (v) , 324 (v)<br>296 (v) , 1168 (r)                                                                                                                                                       |
| 19. | BD | ( 1 ) | C | 8 - H  | 76 | 1.97490 | -0.45077 1457 (v) , 1466 (v) , 254 (v)<br>310 (v)                                                                                                                                                                  |
| 20. | BD | ( 1 ) | N | 9 - C  | 10 | 1.97311 | -0.71918 1478 (v) , 1483 (v) , 1476 (g)<br>1462 (v) , 1484 (v) , 223 (v)<br>1463 (g) , 269 (v) , 1474 (g)<br>1461 (v) , 396 (v) , 1457 (v)                                                                         |
| 21. | BD | ( 2 ) | N | 9 - C  | 10 | 1.85857 | -0.28652 1481 (v) , 1461 (v) , 1457 (v)<br>394 (v) , 1455 (v) , 270 (v)<br>1484 (v)                                                                                                                                |
| 22. | BD | ( 1 ) | N | 9 - C  | 13 | 1.97621 | -0.71960 1482 (v) , 1476 (v) , 1462 (v)<br>1457 (v) , 382 (v) , 1472 (g)<br>1463 (g) , 269 (v) , 1478 (r)<br>1480 (g) , 354 (v) , 352 (v)<br>1475 (v) , 355 (v)                                                    |
| 23. | BD | ( 1 ) | C | 10 - N | 11 | 1.97446 | -0.72168 1463 (v) , 1482 (v) , 1476 (g)<br>1478 (g) , 1477 (g) , 1551 (v)<br>787 (v) , 1484 (v) , 1550 (v)<br>382 (v) , 223 (v)                                                                                    |
| 24. | BD | ( 1 ) | C | 10 - B | 14 | 1.96616 | -0.51296 1474 (v) , 1477 (v) , 1484 (g)<br>422 (v) , 1472 (g) , 1475 (g)<br>1456 (v) , 416 (g) , 367 (v) , 413 (g)<br>1455 (g) , 1485 (v) , 339 (v)<br>338 (v) , 414 (g) , 411 (g) , 419 (g)<br>366 (v)            |
| 25. | BD | ( 1 ) | N | 11 - C | 12 | 1.97540 | -0.71724 1483 (v) , 1476 (v) , 1551 (v)<br>354 (v) , 1549 (v) , 1475 (g)                                                                                                                                           |

|     |                     |         |  |  |                                                                                                                                                                                                                              |
|-----|---------------------|---------|--|--|------------------------------------------------------------------------------------------------------------------------------------------------------------------------------------------------------------------------------|
|     |                     |         |  |  | 396 (v) , 1478 (g) , 352 (v)<br>1463 (r) , 1472 (v) , 787 (v)<br>1480 (g)                                                                                                                                                    |
| 26. | BD ( 1) N 11 - C 41 | 1.98143 |  |  | -0.70796 1552 (v) , 1560 (v) , 1472 (v)<br>1480 (v) , 1475 (g) , 1479 (g)<br>352 (v) , 799 (v) , 1550 (g) , 381 (v)<br>855 (v) , 1477 (g)                                                                                    |
| 27. | BD ( 2) N 11 - C 41 | 1.60454 |  |  | -0.22954 1473 (v) , 1481 (v) , 1550 (g)<br>1549 (g) , 380 (v) , 1479 (g)<br>1551 (g) , 358 (v) , 794 (g) , 788 (g)<br>1560 (v) , 1552 (v)                                                                                    |
| 28. | BD ( 1) C 12 - C 13 | 1.97682 |  |  | -0.66846 1463 (v) , 1478 (v) , 367 (v)<br>339 (v) , 1483 (g) , 1482 (g)                                                                                                                                                      |
| 29. | BD ( 2) C 12 - C 13 | 1.91018 |  |  | -0.24724 1473 (v)                                                                                                                                                                                                            |
| 30. | BD ( 1) C 12 - H 71 | 1.97879 |  |  | -0.49868 1475 (v) , 1474 (v) , 367 (v)<br>395 (v) , 1480 (g)                                                                                                                                                                 |
| 31. | BD ( 1) C 13 - H 72 | 1.97878 |  |  | -0.49877 1472 (v) , 1477 (v) , 339 (v)<br>381 (v) , 1480 (g)                                                                                                                                                                 |
| 32. | BD ( 1) B 14 - B 15 | 1.82710 |  |  | -0.28824 1453 (v) , 1486 (v) , 1485 (g)<br>1455 (g) , 1456 (g) , 352 (v)<br>436 (v) , 1476 (g) , 408 (g)<br>1475 (v) , 1473 (v) , 355 (v)<br>1472 (v) , 226 (v) , 356 (v) , 419 (g)<br>432 (g) , 422 (g) , 411 (g) , 438 (v) |
| 33. | BD ( 1) B 15 - C 16 | 1.95720 |  |  | -0.50897 1484 (g) , 1489 (v) , 1494 (v)<br>408 (v) , 1456 (g) , 1476 (v)<br>1453 (v) , 450 (v) , 492 (v)<br>1455 (v) , 1488 (g) , 1486 (g)<br>430 (g) , 433 (g) , 436 (g) , 452 (v)                                          |
| 34. | BD ( 1) C 16 - N 17 | 1.97511 |  |  | -0.74754 1496 (v) , 1493 (v) , 1485 (g)<br>1489 (g) , 1490 (g) , 1484 (v)<br>1499 (v) , 507 (v) , 1498 (v)<br>466 (v) , 492 (v) , 1497 (v)                                                                                   |
| 35. | BD ( 2) C 16 - N 17 | 1.85625 |  |  | -0.30884 1492 (v) , 224 (v) , 1497 (v)<br>1498 (v) , 464 (v) , 508 (v)                                                                                                                                                       |
| 36. | BD ( 1) C 16 - N 20 | 1.97558 |  |  | -0.75212 1490 (v) , 1495 (v) , 1485 (g)<br>1494 (g) , 1496 (g) , 1525 (v)<br>647 (v) , 480 (v) , 1523 (v) , 450 (v)<br>1524 (v)                                                                                              |
| 37. | BD ( 1) N 17 - C 18 | 1.97731 |  |  | -0.74361 1495 (v) , 1485 (v) , 1499 (v)<br>439 (v) , 1486 (g) , 1490 (g)<br>1497 (v) , 436 (v) , 480 (v)<br>1496 (r) , 507 (v) , 1488 (v)<br>1491 (g)                                                                        |
| 38. | BD ( 1) N 17 - C 21 | 1.98138 |  |  | -0.71684 1500 (v) , 1508 (v) , 1488 (v)<br>1486 (g) , 436 (v) , 1491 (v)<br>465 (v) , 520 (v) , 1489 (g) , 576 (v)<br>1497 (g)                                                                                               |
| 39. | BD ( 1) C 18 - C 19 | 1.97697 |  |  | -0.68216 1490 (v) , 1496 (v) , 450 (v)<br>492 (v) , 1495 (g) , 1493 (g)                                                                                                                                                      |
| 40. | BD ( 2) C 18 - C 19 | 1.87142 |  |  | -0.26470 1487 (v)                                                                                                                                                                                                            |
| 41. | BD ( 1) C 18 - H 63 | 1.97977 |  |  | -0.51490 1486 (v) , 1494 (v) , 450 (v)<br>479 (v) , 1491 (g)                                                                                                                                                                 |
| 42. | BD ( 1) C 19 - N 20 | 1.97686 |  |  | -0.74244 1493 (v) , 1485 (v) , 1525 (v)<br>1488 (g) , 436 (v) , 1496 (g)<br>466 (v) , 1524 (v) , 438 (v)<br>1490 (r) , 647 (v) , 1486 (v)<br>1491 (g)                                                                        |
| 43. | BD ( 1) C 19 - H 64 | 1.98034 |  |  | -0.51517 1488 (v) , 1489 (v) , 492 (v)<br>465 (v) , 1491 (g)                                                                                                                                                                 |
| 44. | BD ( 1) N 20 - C 31 | 1.98185 |  |  | -0.72487 1534 (v) , 1526 (v) , 1486 (v)<br>1488 (g) , 436 (v) , 1491 (v)<br>479 (v) , 716 (v) , 1494 (g)<br>1524 (g) , 660 (v) , 1523 (g)                                                                                    |
| 45. | BD ( 1) C 21 - C 22 | 1.96835 |  |  | -0.63096 1510 (v) , 1504 (v) , 1498 (g)<br>1486 (v) , 1500 (g) , 1512 (v)<br>1489 (v) , 1487 (v) , 578 (v)<br>451 (v) , 1502 (g)                                                                                             |
| 46. | BD ( 1) C 21 - C 26 | 1.96787 |  |  | -0.63406 1502 (v) , 1509 (v) , 1497 (g)<br>1486 (v) , 1508 (g) , 1487 (v)<br>451 (v) , 522 (v) , 1489 (v)                                                                                                                    |

|                         |         |                                                                                                                                            |
|-------------------------|---------|--------------------------------------------------------------------------------------------------------------------------------------------|
| 47. BD ( 2) C 21 - C 26 | 1.67376 | 1510 (g) , 1517 (v) , 1518 (v)<br>-0.22594 1501 (v) , 1506 (v) , 1486 (v)<br>1489 (v) , 1518 (v) , 1517 (v)<br>564 (v) , 521 (v)           |
| 48. BD ( 1) C 22 - C 23 | 1.97239 | -0.62672 1490 (v) , 1507 (v) , 1503 (g)<br>1497 (g) , 549 (v) , 506 (v)<br>1513 (v) , 1502 (g) , 590 (v)                                   |
| 49. BD ( 2) C 22 - C 23 | 1.63022 | -0.21455 1506 (v) , 1499 (v) , 1511 (v)<br>1513 (v) , 550 (v) , 1512 (v)                                                                   |
| 50. BD ( 1) C 22 - C 27 | 1.96962 | -0.54713 1498 (v) , 1503 (v) , 1514 (v)<br>506 (v) , 1608 (v) , 534 (v)<br>1500 (g) , 1497 (g)                                             |
| 51. BD ( 1) C 23 - C 24 | 1.98062 | -0.63148 1502 (v) , 1509 (v) , 1500 (g)<br>1505 (g) , 520 (v) , 563 (v)                                                                    |
| 52. BD ( 1) C 23 - H 67 | 1.97434 | -0.44961 1497 (v) , 1505 (v) , 520 (v)<br>548 (v)                                                                                          |
| 53. BD ( 1) C 24 - C 25 | 1.98089 | -0.63462 1510 (v) , 1504 (v) , 1508 (g)<br>1503 (g) , 576 (v) , 535 (v) , 534 (v)                                                          |
| 54. BD ( 2) C 24 - C 25 | 1.66929 | -0.22093 1499 (v) , 1501 (v)                                                                                                               |
| 55. BD ( 1) C 24 - H 66 | 1.97747 | -0.45366 1508 (v) , 1500 (v) , 534 (v)<br>562 (v) , 1113 (r) , 1103 (r)                                                                    |
| 56. BD ( 1) C 25 - C 26 | 1.97185 | -0.62917 1490 (v) , 1507 (v) , 1498 (g)<br>1505 (g) , 1519 (v) , 549 (v)<br>506 (v) , 618 (v) , 1510 (g)                                   |
| 57. BD ( 1) C 25 - H 65 | 1.97514 | -0.45543 1498 (v) , 1503 (v) , 576 (v)<br>548 (v)                                                                                          |
| 58. BD ( 1) C 26 - C 29 | 1.96965 | -0.55319 1497 (v) , 1505 (v) , 506 (v)<br>1520 (v) , 1605 (v) , 562 (v)<br>1508 (g) , 1498 (g)                                             |
| 59. BD ( 1) C 27 - C 28 | 1.97151 | -0.52757 1501 (v) , 1610 (v) , 1497 (v)<br>1500 (v) , 521 (v) , 1079 (v)                                                                   |
| 60. BD ( 1) C 27 - C 62 | 1.97918 | -0.52407 1497 (v) , 1515 (v) , 1501 (v)<br>1502 (g)                                                                                        |
| 61. BD ( 1) C 27 - H 84 | 1.95937 | -0.41115 1500 (v) , 1609 (v) , 1516 (v)<br>1501 (v)                                                                                        |
| 62. BD ( 1) C 28 - H 90 | 1.98583 | -0.43361 1502 (v)                                                                                                                          |
| 63. BD ( 1) C 28 - H 91 | 1.98733 | -0.43809 1512 (v)                                                                                                                          |
| 64. BD ( 1) C 28 - H 92 | 1.98896 | -0.43441 1513 (v)                                                                                                                          |
| 65. BD ( 1) C 29 - C 30 | 1.97625 | -0.53808 1499 (v) , 1498 (v) , 1606 (v)<br>577 (v) , 1510 (g)                                                                              |
| 66. BD ( 1) C 29 - C 61 | 1.97478 | -0.53465 1499 (v) , 1498 (v) , 1522 (v)<br>1510 (g)                                                                                        |
| 67. BD ( 1) C 29 - H 83 | 1.96477 | -0.42514 1508 (v) , 1607 (v) , 1521 (v)                                                                                                    |
| 68. BD ( 1) C 30 - H 93 | 1.98638 | -0.44097 1510 (v)                                                                                                                          |
| 69. BD ( 1) C 30 - H 94 | 1.98825 | -0.44229 1519 (v)                                                                                                                          |
| 70. BD ( 1) C 30 - H 95 | 1.98830 | -0.44198 1518 (v)                                                                                                                          |
| 71. BD ( 1) C 31 - C 32 | 1.96778 | -0.64047 1536 (v) , 1530 (v) , 1524 (g)<br>1488 (v) , 1526 (g) , 717 (v)<br>1537 (v) , 1494 (v) , 493 (v)<br>1528 (g)                      |
| 72. BD ( 1) C 31 - C 36 | 1.96880 | -0.64149 1528 (v) , 1535 (v) , 1523 (g)<br>1488 (v) , 1534 (g) , 1494 (v)<br>1544 (v) , 493 (v) , 1536 (g)<br>661 (v) , 703 (v) , 1543 (v) |
| 73. BD ( 2) C 31 - C 36 | 1.65932 | -0.23277 1527 (v) , 1532 (v) , 1488 (v)<br>1494 (v) , 1543 (v) , 1544 (v)<br>704 (v)                                                       |
| 74. BD ( 1) C 32 - C 33 | 1.97272 | -0.63809 1496 (v) , 1533 (v) , 1529 (g)<br>1523 (g) , 1539 (v) , 689 (v)<br>646 (v) , 730 (v) , 1528 (g)                                   |
| 75. BD ( 2) C 32 - C 33 | 1.64228 | -0.22841 1532 (v) , 1525 (v) , 1538 (v)<br>1537 (v) , 690 (v)                                                                              |
| 76. BD ( 1) C 32 - C 37 | 1.97001 | -0.55922 1524 (v) , 1529 (v) , 646 (v)<br>1587 (v) , 1540 (v) , 674 (v)<br>1526 (g) , 1523 (g)                                             |
| 77. BD ( 1) C 33 - C 34 | 1.98090 | -0.64364 1528 (v) , 1535 (v) , 1526 (g)<br>1531 (g) , 660 (v) , 703 (v)                                                                    |
| 78. BD ( 1) C 33 - H 70 | 1.97515 | -0.46347 1523 (v) , 1531 (v) , 660 (v)<br>688 (v)                                                                                          |
| 79. BD ( 1) C 34 - C 35 | 1.98086 | -0.64383 1536 (v) , 1530 (v) , 1534 (g)<br>1529 (g) , 716 (v)                                                                              |



|                          |         |                                                                                                                                                                                                                                                                                                                                                 |
|--------------------------|---------|-------------------------------------------------------------------------------------------------------------------------------------------------------------------------------------------------------------------------------------------------------------------------------------------------------------------------------------------------|
| 80. BD ( 2) C 34 - C 35  | 1.66541 | -0.23018 1525 (v), 1527 (v)                                                                                                                                                                                                                                                                                                                     |
| 81. BD ( 1) C 34 - H 69  | 1.97730 | -0.46349 1534 (v), 1526 (v), 702 (v)<br>674 (v), 1128 (x), 1118 (x)                                                                                                                                                                                                                                                                             |
| 82. BD ( 1) C 35 - C 36  | 1.97274 | -0.63694 1496 (v), 1533 (v), 1524 (g)<br>1531 (g), 1545 (v), 689 (v)<br>646 (v), 1536 (g), 758 (v)                                                                                                                                                                                                                                              |
| 83. BD ( 1) C 35 - H 68  | 1.97505 | -0.46194 1524 (v), 1529 (v), 716 (v)<br>688 (v)                                                                                                                                                                                                                                                                                                 |
| 84. BD ( 1) C 36 - C 39  | 1.96945 | -0.55598 1523 (v), 1531 (v), 646 (v)<br>1546 (v), 1590 (v), 702 (v)<br>1534 (g), 1524 (g)                                                                                                                                                                                                                                                       |
| 85. BD ( 1) C 37 - C 38  | 1.97786 | -0.54302 1523 (v), 1527 (v), 1589 (v)<br>661 (v), 1528 (g)                                                                                                                                                                                                                                                                                      |
| 86. BD ( 1) C 37 - C 55  | 1.97252 | -0.53746 1527 (v), 1523 (v), 1541 (v)<br>662 (v), 1528 (g), 744 (v)                                                                                                                                                                                                                                                                             |
| 87. BD ( 1) C 37 - H 85  | 1.96378 | -0.42874 1526 (v), 1542 (v), 1588 (v)                                                                                                                                                                                                                                                                                                           |
| 88. BD ( 1) C 38 - H 105 | 1.98608 | -0.44367 1528 (v)                                                                                                                                                                                                                                                                                                                               |
| 89. BD ( 1) C 38 - H 106 | 1.98876 | -0.44508 1538 (v)                                                                                                                                                                                                                                                                                                                               |
| 90. BD ( 1) C 38 - H 107 | 1.98837 | -0.44651 1539 (v)                                                                                                                                                                                                                                                                                                                               |
| 91. BD ( 1) C 39 - C 40  | 1.97424 | -0.53674 1525 (v), 1524 (v), 1591 (v)<br>718 (v), 1536 (g)                                                                                                                                                                                                                                                                                      |
| 92. BD ( 1) C 39 - C 56  | 1.97484 | -0.53277 1524 (v), 1525 (v), 1548 (v)<br>1536 (g)                                                                                                                                                                                                                                                                                               |
| 93. BD ( 1) C 39 - H 86  | 1.96388 | -0.42166 1534 (v), 1592 (v), 1547 (v)                                                                                                                                                                                                                                                                                                           |
| 94. BD ( 1) C 40 - H 99  | 1.98600 | -0.43985 1536 (v)                                                                                                                                                                                                                                                                                                                               |
| 95. BD ( 1) C 40 - H 100 | 1.98848 | -0.44199 1545 (v)                                                                                                                                                                                                                                                                                                                               |
| 96. BD ( 1) C 40 - H 101 | 1.98843 | -0.44171 1544 (v)                                                                                                                                                                                                                                                                                                                               |
| 97. BD ( 1) C 41 - C 42  | 1.75785 | -0.40643 1479 (g), 1550 (g), 1549 (g)<br>794 (g), 1551 (g), 788 (g), 789 (g)<br>1556 (v), 1562 (v), 792 (g)<br>1475 (v), 1564 (v), 1477 (v)<br>809 (g), 861 (v), 855 (v), 787 (g)<br>800 (g), 816 (v), 802 (g), 865 (v)<br>790 (g), 1560 (v), 805 (g), 867 (v)<br>815 (v), 1554 (g), 793 (g), 814 (v)                                           |
| 98. BD ( 1) C 41 - C 46  | 1.74502 | -0.39338 1479 (g), 1549 (g), 1550 (g)<br>794 (g), 1551 (g), 788 (g), 789 (g)<br>1561 (v), 1554 (v), 1475 (v)<br>792 (g), 858 (g), 842 (v), 805 (v)<br>1478 (g), 787 (g), 865 (g), 844 (v)<br>855 (g), 856 (g), 1570 (v)<br>1569 (v), 809 (v), 1552 (v)<br>1562 (g), 898 (v), 1477 (v)<br>793 (g), 790 (g), 867 (g), 799 (v)<br>811 (v), 902 (v) |
| 99. BD ( 2) C 41 - C 46  | 1.64949 | -0.20314 1479 (g), 1553 (v), 1558 (v)<br>1549 (g), 1550 (g), 1475 (v)<br>1477 (v), 794 (g), 1569 (v)<br>1570 (v), 1551 (g), 843 (v)<br>788 (g), 789 (g)                                                                                                                                                                                         |
| 100. BD ( 1) C 42 - C 43 | 1.97345 | -0.62639 1478 (v), 1559 (v), 1555 (g)<br>1549 (g), 1479 (v), 828 (v)<br>786 (v), 1565 (v), 1554 (g)<br>869 (v)                                                                                                                                                                                                                                  |
| 101. BD ( 2) C 42 - C 43 | 1.63619 | -0.21701 1558 (v), 1551 (v), 1563 (v)<br>829 (v), 1565 (v), 1564 (v)                                                                                                                                                                                                                                                                            |
| 102. BD ( 1) C 42 - C 47 | 1.96988 | -0.54167 1479 (v), 1555 (v), 1550 (v)<br>786 (v), 1566 (v), 1593 (v)<br>813 (v), 1552 (g)                                                                                                                                                                                                                                                       |
| 103. BD ( 1) C 43 - C 44 | 1.98096 | -0.63321 1554 (v), 1561 (v), 1552 (g)<br>1557 (g), 799 (v), 842 (v)                                                                                                                                                                                                                                                                             |
| 104. BD ( 1) C 43 - H 75 | 1.97475 | -0.45107 1557 (v), 1549 (v), 799 (v)<br>827 (v)                                                                                                                                                                                                                                                                                                 |
| 105. BD ( 1) C 44 - C 45 | 1.98096 | -0.63649 1562 (v), 1556 (v), 1560 (g)<br>1555 (g), 855 (v), 813 (v)                                                                                                                                                                                                                                                                             |
| 106. BD ( 2) C 44 - C 45 | 1.67441 | -0.22311 1551 (v), 1553 (v)                                                                                                                                                                                                                                                                                                                     |
| 107. BD ( 1) C 44 - H 74 | 1.97752 | -0.45579 1560 (v), 1552 (v), 841 (v)<br>813 (v), 1153 (x), 1143 (x)                                                                                                                                                                                                                                                                             |
| 108. BD ( 1) C 45 - C 46 | 1.97278 | -0.62913 1478 (v), 1559 (v), 1550 (g)<br>1557 (g), 1571 (v), 1479 (v)<br>828 (v), 786 (v), 897 (v), 1562 (g)                                                                                                                                                                                                                                    |

|      |    |   |    |   |    |   |   |     |         |                             |                              |
|------|----|---|----|---|----|---|---|-----|---------|-----------------------------|------------------------------|
| 109. | BD | ( | 1) | C | 45 | - | H | 73  | 1.97534 | -0.45630                    | 1555 (v), 1550 (v), 855 (v)  |
| 110. | BD | ( | 1) | C | 46 | - | C | 49  | 1.96959 | -0.55162                    | 1479 (v), 1557 (v), 1549 (v) |
| 111. | BD | ( | 1) | C | 47 | - | C | 48  | 1.96910 | -0.51752                    | 1553 (v), 1595 (v), 1552 (v) |
| 112. | BD | ( | 1) | C | 47 | - | C | 57  | 1.97975 | -0.51944                    | 1549 (v), 1567 (v), 800 (v)  |
| 113. | BD | ( | 1) | C | 47 | - | H | 80  | 1.95741 | -0.39872                    | 1552 (v), 1594 (v), 1568 (v) |
| 114. | BD | ( | 1) | C | 48 | - | H | 126 | 1.98559 | -0.42435                    | 1554 (v)                     |
| 115. | BD | ( | 1) | C | 48 | - | H | 127 | 1.98706 | -0.42894                    | 1564 (v)                     |
| 116. | BD | ( | 1) | C | 48 | - | H | 128 | 1.98982 | -0.42719                    | 1565 (v)                     |
| 117. | BD | ( | 1) | C | 49 | - | C | 50  | 1.97532 | -0.53535                    | 1551 (v), 1550 (v), 1597 (v) |
| 118. | BD | ( | 1) | C | 49 | - | C | 58  | 1.97545 | -0.53411                    | 1551 (v), 1550 (v), 1574 (v) |
| 119. | BD | ( | 1) | C | 49 | - | H | 79  | 1.96417 | -0.42156                    | 1560 (v), 1598 (v), 1573 (v) |
| 120. | BD | ( | 1) | C | 50 | - | H | 129 | 1.98629 | -0.43880                    | 1562 (v)                     |
| 121. | BD | ( | 1) | C | 50 | - | H | 130 | 1.98839 | -0.44053                    | 1571 (v)                     |
| 122. | BD | ( | 1) | C | 50 | - | H | 131 | 1.98804 | -0.43970                    | 1570 (v)                     |
| 123. | BD | ( | 1) | C | 51 | - | C | 52  | 1.97541 | -0.53517                    | 1462 (v), 1461 (v), 1601 (v) |
| 124. | BD | ( | 1) | C | 51 | - | C | 59  | 1.97561 | -0.53506                    | 1462 (v), 1461 (v), 1579 (v) |
| 125. | BD | ( | 1) | C | 51 | - | H | 81  | 1.96408 | -0.42206                    | 1464 (v), 1600 (v), 1580 (v) |
| 126. | BD | ( | 1) | C | 52 | - | H | 114 | 1.98624 | -0.43889                    | 1465 (v)                     |
| 127. | BD | ( | 1) | C | 52 | - | H | 115 | 1.98831 | -0.43949                    | 1576 (v)                     |
| 128. | BD | ( | 1) | C | 52 | - | H | 116 | 1.98844 | -0.44074                    | 1577 (v)                     |
| 129. | BD | ( | 1) | C | 53 | - | C | 54  | 1.96921 | -0.51830                    | 1459 (v), 1603 (v), 1457 (v) |
| 130. | BD | ( | 1) | C | 53 | - | C | 60  | 1.97956 | -0.51874                    | 1457 (v), 1586 (v), 1459 (v) |
| 131. | BD | ( | 1) | C | 53 | - | H | 82  | 1.95860 | -0.40000                    | 1458 (v), 1604 (v), 1585 (v) |
| 132. | BD | ( | 1) | C | 54 | - | H | 117 | 1.98561 | -0.42530                    | 1460 (v)                     |
| 133. | BD | ( | 1) | C | 54 | - | H | 118 | 1.98955 | -0.42769                    | 1583 (v)                     |
| 134. | BD | ( | 1) | C | 54 | - | H | 119 | 1.98730 | -0.42974                    | 1582 (v)                     |
| 135. | BD | ( | 1) | C | 55 | - | H | 108 | 1.98449 | -0.43488                    | 1528 (v)                     |
| 136. | BD | ( | 1) | C | 55 | - | H | 109 | 1.98741 | -0.43738                    | 1539 (v)                     |
| 137. | BD | ( | 1) | C | 55 | - | H | 110 | 1.98644 | -0.43170                    | 1537 (v)                     |
| 138. | BD | ( | 1) | C | 56 | - | H | 102 | 1.98436 | -0.42720                    | 1536 (v)                     |
| 139. | BD | ( | 1) | C | 56 | - | H | 103 | 1.98632 | -0.42387                    | 1543 (v)                     |
| 140. | BD | ( | 1) | C | 56 | - | H | 104 | 1.98716 | -0.43095                    | 1545 (v)                     |
| 141. | BD | ( | 1) | C | 57 | - | H | 123 | 1.98474 | -0.41620                    | 1554 (v)                     |
| 142. | BD | ( | 1) | C | 57 | - | H | 124 | 1.98872 | -0.42463                    | 1565 (v)                     |
| 143. | BD | ( | 1) | C | 57 | - | H | 125 | 1.98684 | -0.41864                    | 1563 (v)                     |
| 144. | BD | ( | 1) | C | 58 | - | H | 132 | 1.98532 | -0.43377                    | 1562 (v)                     |
| 145. | BD | ( | 1) | C | 58 | - | H | 133 | 1.98713 | -0.43197                    | 1569 (v)                     |
| 146. | BD | ( | 1) | C | 58 | - | H | 134 | 1.98795 | -0.43674                    | 1571 (v)                     |
| 147. | BD | ( | 1) | C | 59 | - | H | 111 | 1.98540 | -0.43476                    | 1465 (v)                     |
| 148. | BD | ( | 1) | C | 59 | - | H | 112 | 1.98797 | -0.43734                    | 1577 (v)                     |
| 149. | BD | ( | 1) | C | 59 | - | H | 113 | 1.98638 | -0.43257                    | 1575 (v)                     |
| 150. | BD | ( | 1) | C | 60 | - | H | 120 | 1.98440 | -0.41192                    | 1460 (v)                     |
| 151. | BD | ( | 1) | C | 60 | - | H | 121 | 1.98692 | -0.41430                    | 1581 (v)                     |
| 152. | BD | ( | 1) | C | 60 | - | H | 122 | 1.98826 | -0.42173                    | 1583 (v)                     |
| 153. | BD | ( | 1) | C | 61 | - | H | 96  | 1.98496 | -0.43294                    | 1510 (v)                     |
| 154. | BD | ( | 1) | C | 61 | - | H | 97  | 1.98679 | -0.43018                    | 1517 (v)                     |
| 155. | BD | ( | 1) | C | 61 | - | H | 98  | 1.98764 | -0.43495                    | 1519 (v)                     |
| 156. | BD | ( | 1) | C | 62 | - | H | 87  | 1.98463 | -0.42022                    | 1502 (v)                     |
| 157. | BD | ( | 1) | C | 62 | - | H | 88  | 1.98761 | -0.42450                    | 1513 (v)                     |
| 158. | BD | ( | 1) | C | 62 | - | H | 89  | 1.98595 | -0.41384                    | 1511 (v)                     |
| 159. | CR | ( | 1) | C | 1  |   |   |     | 1.99867 | -9.74357                    | 1485 (v), 1456 (g), 1453 (g) |
| 160. | CR | ( | 1) | O | 2  |   |   |     | 1.99981 | -18.41443                   | 226 (v), 1456 (v), 1455 (v)  |
| 161. | CR | ( | 1) | C | 3  |   |   |     | 1.99898 | -9.73478                    | 325 (v), 270 (v), 1461 (v)   |
| 162. | CR | ( | 1) | C | 4  |   |   |     | 1.99875 | -9.77349                    | 1472 (v), 282 (v), 1465 (v)  |
|      |    |   |    |   |    |   |   |     |         | 254 (v), 1460 (v), 1474 (v) |                              |
|      |    |   |    |   |    |   |   |     |         | 1463 (g), 255 (v), 1457 (g) |                              |

|                   |         |                                                                                                                      |
|-------------------|---------|----------------------------------------------------------------------------------------------------------------------|
| 163. CR ( 1) C 5  | 1.99898 | 1461 (g) , 1464 (v)<br>-9.73872 297 (v) , 270 (v) , 1463 (v)<br>1457 (v) , 926 (v) , 1466 (v)                        |
| 164. CR ( 1) C 6  | 1.99910 | -9.72728 311 (v) , 283 (v) , 284 (v) , 1465 (v)<br>1461 (v) , 1469 (v) , 1169 (v)                                    |
| 165. CR ( 1) C 7  | 1.99920 | -9.73058 297 (v) , 325 (v) , 1458 (v)<br>1464 (v)                                                                    |
| 166. CR ( 1) C 8  | 1.99910 | -9.72423 255 (v) , 311 (v) , 1460 (v)<br>1466 (v) , 1457 (v)                                                         |
| 167. CR ( 1) N 9  | 1.99944 | -13.85327 396 (v) , 268 (v) , 1476 (v)                                                                               |
| 168. CR ( 1) C 10 | 1.99868 | -9.79369 1484 (v) , 1476 (g) , 1478 (v)<br>1463 (v) , 408 (v) , 411 (v)<br>1474 (v) , 1477 (v)                       |
| 169. CR ( 1) N 11 | 1.99943 | -13.85487 354 (v) , 382 (v) , 786 (v) , 1476 (v)                                                                     |
| 170. CR ( 1) C 12 | 1.99903 | -9.77424 1480 (g) , 1478 (v) , 395 (v)<br>1483 (v) , 396 (v) , 368 (v)<br>1475 (v) , 1133 (v)                        |
| 171. CR ( 1) C 13 | 1.99902 | -9.77405 1463 (v) , 1480 (g) , 382 (v)<br>1482 (v) , 381 (v) , 340 (v)<br>1472 (v) , 1138 (v)                        |
| 172. CR ( 1) B 14 | 1.99760 | -6.32246 1485 (v) , 1453 (v) , 1475 (v)<br>1456 (v) , 1472 (v) , 422 (v)<br>1484 (g) , 1455 (g) , 352 (v)            |
| 173. CR ( 1) B 15 | 1.99700 | -6.31239 1453 (v) , 1476 (v) , 1488 (v)<br>408 (v) , 1455 (v) , 1484 (g)<br>1486 (v) , 226 (v) , 436 (v)<br>1456 (g) |
| 174. CR ( 1) C 16 | 1.99876 | -9.80772 1485 (g) , 1484 (v) , 1496 (v)<br>1490 (v) , 423 (v) , 1489 (v)<br>1494 (v) , 452 (v)                       |
| 175. CR ( 1) N 17 | 1.99942 | -13.87266 439 (v) , 466 (v) , 506 (v) , 1485 (v)                                                                     |
| 176. CR ( 1) C 18 | 1.99904 | -9.79290 1490 (v) , 479 (v) , 1491 (g)<br>1495 (v) , 480 (v) , 452 (v)<br>1486 (v) , 1093 (v)                        |
| 177. CR ( 1) C 19 | 1.99904 | -9.79352 1496 (v) , 465 (v) , 1491 (g)<br>1493 (v) , 466 (v) , 494 (v)<br>1488 (v) , 1098 (v)                        |
| 178. CR ( 1) N 20 | 1.99942 | -13.87399 480 (v) , 646 (v) , 1485 (v)                                                                               |
| 179. CR ( 1) C 21 | 1.99873 | -9.77824 1486 (v) , 576 (v) , 1510 (v)<br>520 (v) , 1490 (g) , 1502 (v)<br>1489 (v) , 1498 (g) , 1497 (g)<br>522 (v) |
| 180. CR ( 1) C 22 | 1.99897 | -9.73731 508 (v) , 1490 (v) , 1498 (v)<br>535 (v) , 536 (v) , 1503 (v) , 592 (v)                                     |
| 181. CR ( 1) C 23 | 1.99910 | -9.72359 522 (v) , 549 (v) , 1502 (v)<br>1497 (v) , 1505 (v) , 1114 (v)                                              |
| 182. CR ( 1) C 24 | 1.99920 | -9.72917 563 (v) , 535 (v) , 1500 (v)<br>1508 (v)                                                                    |
| 183. CR ( 1) C 25 | 1.99909 | -9.72703 549 (v) , 578 (v) , 1510 (v)<br>1498 (v) , 1503 (v)                                                         |
| 184. CR ( 1) C 26 | 1.99898 | -9.74018 563 (v) , 508 (v) , 1497 (v)<br>1490 (v) , 619 (v) , 1505 (v)                                               |
| 185. CR ( 1) C 27 | 1.99936 | -9.74236 520 (v) , 1081 (v) , 606 (v)<br>1497 (v) , 1500 (v)                                                         |
| 186. CR ( 1) C 28 | 1.99941 | -9.72939 591 (v) , 594 (v)                                                                                           |
| 187. CR ( 1) C 29 | 1.99937 | -9.75218 576 (v) , 634 (v) , 1498 (v)<br>1067 (v) , 1508 (v)                                                         |
| 188. CR ( 1) C 30 | 1.99942 | -9.73519 1244 (v) , 620 (v)                                                                                          |
| 189. CR ( 1) C 31 | 1.99874 | -9.78552 1488 (v) , 716 (v) , 660 (v)<br>1528 (v) , 1536 (v) , 1496 (g)<br>1494 (v) , 1524 (g) , 1523 (g)            |
| 190. CR ( 1) C 32 | 1.99898 | -9.74836 648 (v) , 675 (v) , 1524 (v)<br>1496 (v) , 731 (v) , 1529 (v)                                               |
| 191. CR ( 1) C 33 | 1.99910 | -9.73618 689 (v) , 661 (v) , 662 (v) , 1528 (v)<br>1531 (v) , 1523 (v) , 1129 (v)                                    |
| 192. CR ( 1) C 34 | 1.99920 | -9.73970 703 (v) , 675 (v) , 1534 (v)<br>1526 (v)                                                                    |
| 193. CR ( 1) C 35 | 1.99910 | -9.73523 717 (v) , 689 (v) , 1536 (v)<br>1529 (v) , 1524 (v)                                                         |
| 194. CR ( 1) C 36 | 1.99898 | -9.74625 703 (v) , 648 (v) , 1523 (v)<br>1496 (v) , 759 (v) , 1531 (v)                                               |

|                    |         |                                                                                                                                |
|--------------------|---------|--------------------------------------------------------------------------------------------------------------------------------|
| 195. CR ( 1) C 37  | 1.99937 | -9.75585 660 (v) , 746 (v) , 983 (v) , 1523 (v)<br>1526 (v)                                                                    |
| 196. CR ( 1) C 38  | 1.99942 | -9.73816 1304 (v)                                                                                                              |
| 197. CR ( 1) C 39  | 1.99936 | -9.75047 716 (v) , 774 (v) , 997 (v) , 1524 (v)<br>1534 (v)                                                                    |
| 198. CR ( 1) C 40  | 1.99942 | -9.73498 1274 (v) , 1284 (v)                                                                                                   |
| 199. CR ( 1) C 41  | 1.99874 | -9.77495 1475 (v) , 855 (v) , 1562 (v)<br>1554 (v) , 800 (v) , 799 (v)<br>1478 (g) , 1477 (v) , 856 (v)<br>1560 (v)            |
| 200. CR ( 1) C 42  | 1.99899 | -9.73569 1479 (v) , 788 (v) , 1478 (v)<br>815 (v) , 870 (v) , 1555 (v) , 814 (v)                                               |
| 201. CR ( 1) C 43  | 1.99911 | -9.72450 800 (v) , 828 (v) , 1554 (v)<br>1557 (v) , 1154 (v)                                                                   |
| 202. CR ( 1) C 44  | 1.99920 | -9.73076 842 (v) , 815 (v) , 1552 (v)<br>1560 (v)                                                                              |
| 203. CR ( 1) C 45  | 1.99909 | -9.72741 856 (v) , 828 (v) , 1562 (v)<br>1555 (v)                                                                              |
| 204. CR ( 1) C 46  | 1.99898 | -9.73887 1479 (v) , 842 (v) , 788 (v)<br>1478 (v) , 898 (v) , 1557 (v)                                                         |
| 205. CR ( 1) C 47  | 1.99935 | -9.73187 799 (v) , 1011 (v) , 885 (v)<br>1552 (v) , 1549 (v)                                                                   |
| 206. CR ( 1) C 48  | 1.99941 | -9.72099 871 (v)                                                                                                               |
| 207. CR ( 1) C 49  | 1.99936 | -9.74888 855 (v) , 1025 (v) , 913 (v)<br>1550 (v) , 1560 (v)                                                                   |
| 208. CR ( 1) C 50  | 1.99942 | -9.73323 1424 (v)                                                                                                              |
| 209. CR ( 1) C 51  | 1.99937 | -9.74930 282 (v) , 941 (v) , 1461 (v)<br>1039 (v) , 1464 (v)                                                                   |
| 210. CR ( 1) C 52  | 1.99942 | -9.73320 927 (v) , 1349 (v)                                                                                                    |
| 211. CR ( 1) C 53  | 1.99935 | -9.73246 254 (v) , 1053 (v) , 969 (v)<br>1457 (v) , 1458 (v)                                                                   |
| 212. CR ( 1) C 54  | 1.99941 | -9.72175 955 (v)                                                                                                               |
| 213. CR ( 1) C 55  | 1.99941 | -9.72849 732 (v)                                                                                                               |
| 214. CR ( 1) C 56  | 1.99942 | -9.72098 760 (v)                                                                                                               |
| 215. CR ( 1) C 57  | 1.99943 | -9.71204 870 (v)                                                                                                               |
| 216. CR ( 1) C 58  | 1.99942 | -9.72714 899 (v) , 1444 (v)                                                                                                    |
| 217. CR ( 1) C 59  | 1.99941 | -9.72782 1335 (v) , 927 (v)                                                                                                    |
| 218. CR ( 1) C 60  | 1.99943 | -9.70843 954 (v) , 1384 (v)                                                                                                    |
| 219. CR ( 1) C 61  | 1.99942 | -9.72630 620 (v) , 1264 (v)                                                                                                    |
| 220. CR ( 1) C 62  | 1.99942 | -9.71137                                                                                                                       |
| 221. LP ( 1) O 2   | 1.96474 | -0.57212 226 (v) , 1456 (v) , 1455 (v)<br>232 (v)                                                                              |
| 222. LP ( 2) O 2   | 1.74913 | -0.15921 1455 (v) , 1456 (v) , 228 (v)<br>230 (v) , 1565 (r)                                                                   |
| 223. LP* ( 1) B 14 | 0.58308 | 0.02866 224 (v) , 1454 (v) , 1551 (r)<br>1472 (v) , 1475 (v) , 1462 (r)<br>410 (g) , 1484 (g) , 1487 (r)<br>417 (g) , 1455 (g) |
| 224. LP ( 1) B 15  | 0.74839 | 0.02727 223 (v) , 1454 (v) , 1487 (v)<br>1488 (v) , 424 (g) , 1486 (v)<br>227 (v) , 1551 (r)                                   |
| 225. LP ( 1) N 20  | 1.53944 | -0.24744 1487 (v) , 1492 (v) , 1523 (v)<br>1524 (v) , 478 (v) , 648 (v) , 441 (v)                                              |
| 226. RY* ( 1) C 1  | 0.01705 | 1.01327                                                                                                                        |
| 227. RY* ( 2) C 1  | 0.00521 | 2.06636                                                                                                                        |
| 228. RY* ( 3) C 1  | 0.00290 | 2.24678                                                                                                                        |
| 229. RY* ( 4) C 1  | 0.00155 | 1.76412                                                                                                                        |
| 230. RY* ( 5) C 1  | 0.00086 | 0.89622                                                                                                                        |
| 231. RY* ( 6) C 1  | 0.00055 | 0.58366                                                                                                                        |
| 232. RY* ( 7) C 1  | 0.00041 | 2.40922                                                                                                                        |
| 233. RY* ( 8) C 1  | 0.00029 | 1.94890                                                                                                                        |
| 234. RY* ( 9) C 1  | 0.00015 | 1.75990                                                                                                                        |
| 235. RY* ( 10) C 1 | 0.00010 | 2.24307                                                                                                                        |
| 236. RY* ( 11) C 1 | 0.00008 | 1.69330                                                                                                                        |
| 237. RY* ( 12) C 1 | 0.00002 | 2.46793                                                                                                                        |
| 238. RY* ( 13) C 1 | 0.00002 | 2.63134                                                                                                                        |
| 239. RY* ( 14) C 1 | 0.00000 | 20.01219                                                                                                                       |
| 240. RY* ( 1) O 2  | 0.00533 | 0.85683                                                                                                                        |
| 241. RY* ( 2) O 2  | 0.00361 | 0.78659                                                                                                                        |
| 242. RY* ( 3) O 2  | 0.00179 | 1.25683                                                                                                                        |
| 243. RY* ( 4) O 2  | 0.00041 | 0.71755                                                                                                                        |

|      |     |      |   |   |         |          |
|------|-----|------|---|---|---------|----------|
| 244. | RY* | ( 5) | O | 2 | 0.00004 | 4.31106  |
| 245. | RY* | ( 6) | O | 2 | 0.00001 | 2.95893  |
| 246. | RY* | ( 7) | O | 2 | 0.00001 | 3.38809  |
| 247. | RY* | ( 8) | O | 2 | 0.00001 | 2.98594  |
| 248. | RY* | ( 9) | O | 2 | 0.00001 | 4.12688  |
| 249. | RY* | (10) | O | 2 | 0.00001 | 2.69385  |
| 250. | RY* | (11) | O | 2 | 0.00001 | 2.93138  |
| 251. | RY* | (12) | O | 2 | 0.00001 | 3.19118  |
| 252. | RY* | (13) | O | 2 | 0.00001 | 2.73098  |
| 253. | RY* | (14) | O | 2 | 0.00000 | 41.02280 |
| 254. | RY* | ( 1) | C | 3 | 0.00513 | 1.36040  |
| 255. | RY* | ( 2) | C | 3 | 0.00305 | 1.08649  |
| 256. | RY* | ( 3) | C | 3 | 0.00254 | 0.79294  |
| 257. | RY* | ( 4) | C | 3 | 0.00148 | 1.03935  |
| 258. | RY* | ( 5) | C | 3 | 0.00077 | 1.74847  |
| 259. | RY* | ( 6) | C | 3 | 0.00043 | 1.60159  |
| 260. | RY* | ( 7) | C | 3 | 0.00040 | 1.93876  |
| 261. | RY* | ( 8) | C | 3 | 0.00036 | 2.01019  |
| 262. | RY* | ( 9) | C | 3 | 0.00024 | 1.93989  |
| 263. | RY* | (10) | C | 3 | 0.00014 | 2.33322  |
| 264. | RY* | (11) | C | 3 | 0.00012 | 2.35496  |
| 265. | RY* | (12) | C | 3 | 0.00008 | 1.52046  |
| 266. | RY* | (13) | C | 3 | 0.00004 | 2.39600  |
| 267. | RY* | (14) | C | 3 | 0.00000 | 21.26725 |
| 268. | RY* | ( 1) | C | 4 | 0.00649 | 1.35795  |
| 269. | RY* | ( 2) | C | 4 | 0.00335 | 0.75199  |
| 270. | RY* | ( 3) | C | 4 | 0.00249 | 1.13961  |
| 271. | RY* | ( 4) | C | 4 | 0.00113 | 1.45530  |
| 272. | RY* | ( 5) | C | 4 | 0.00080 | 1.91383  |
| 273. | RY* | ( 6) | C | 4 | 0.00069 | 2.00971  |
| 274. | RY* | ( 7) | C | 4 | 0.00058 | 1.92933  |
| 275. | RY* | ( 8) | C | 4 | 0.00041 | 1.71307  |
| 276. | RY* | ( 9) | C | 4 | 0.00038 | 1.69483  |
| 277. | RY* | (10) | C | 4 | 0.00033 | 1.82971  |
| 278. | RY* | (11) | C | 4 | 0.00012 | 2.47991  |
| 279. | RY* | (12) | C | 4 | 0.00010 | 2.01067  |
| 280. | RY* | (13) | C | 4 | 0.00005 | 2.38717  |
| 281. | RY* | (14) | C | 4 | 0.00000 | 21.50815 |
| 282. | RY* | ( 1) | C | 5 | 0.00510 | 1.40435  |
| 283. | RY* | ( 2) | C | 5 | 0.00298 | 0.96586  |
| 284. | RY* | ( 3) | C | 5 | 0.00284 | 0.89740  |
| 285. | RY* | ( 4) | C | 5 | 0.00148 | 1.02311  |
| 286. | RY* | ( 5) | C | 5 | 0.00067 | 1.89250  |
| 287. | RY* | ( 6) | C | 5 | 0.00049 | 1.78158  |
| 288. | RY* | ( 7) | C | 5 | 0.00041 | 1.74489  |
| 289. | RY* | ( 8) | C | 5 | 0.00028 | 1.87015  |
| 290. | RY* | ( 9) | C | 5 | 0.00021 | 1.88335  |
| 291. | RY* | (10) | C | 5 | 0.00013 | 2.42101  |
| 292. | RY* | (11) | C | 5 | 0.00011 | 2.17567  |
| 293. | RY* | (12) | C | 5 | 0.00007 | 1.57664  |
| 294. | RY* | (13) | C | 5 | 0.00004 | 2.42354  |
| 295. | RY* | (14) | C | 5 | 0.00000 | 21.08030 |
| 296. | RY* | ( 1) | C | 6 | 0.00409 | 1.42571  |
| 297. | RY* | ( 2) | C | 6 | 0.00143 | 1.10791  |
| 298. | RY* | ( 3) | C | 6 | 0.00131 | 0.54220  |
| 299. | RY* | ( 4) | C | 6 | 0.00060 | 1.32875  |
| 300. | RY* | ( 5) | C | 6 | 0.00048 | 1.87643  |
| 301. | RY* | ( 6) | C | 6 | 0.00015 | 2.46131  |
| 302. | RY* | ( 7) | C | 6 | 0.00009 | 1.75899  |
| 303. | RY* | ( 8) | C | 6 | 0.00005 | 2.02057  |
| 304. | RY* | ( 9) | C | 6 | 0.00006 | 1.64486  |
| 305. | RY* | (10) | C | 6 | 0.00006 | 1.17888  |
| 306. | RY* | (11) | C | 6 | 0.00002 | 1.82149  |
| 307. | RY* | (12) | C | 6 | 0.00001 | 1.83985  |
| 308. | RY* | (13) | C | 6 | 0.00002 | 2.28675  |
| 309. | RY* | (14) | C | 6 | 0.00000 | 20.82809 |
| 310. | RY* | ( 1) | C | 7 | 0.00412 | 1.20618  |
| 311. | RY* | ( 2) | C | 7 | 0.00185 | 1.20728  |
| 312. | RY* | ( 3) | C | 7 | 0.00091 | 0.54798  |
| 313. | RY* | ( 4) | C | 7 | 0.00054 | 1.64307  |
| 314. | RY* | ( 5) | C | 7 | 0.00051 | 1.44725  |

|      |     |      |   |    |         |          |
|------|-----|------|---|----|---------|----------|
| 315. | RY* | ( 6) | C | 7  | 0.00020 | 2.41899  |
| 316. | RY* | ( 7) | C | 7  | 0.00007 | 1.81944  |
| 317. | RY* | ( 8) | C | 7  | 0.00004 | 2.08090  |
| 318. | RY* | ( 9) | C | 7  | 0.00005 | 1.47214  |
| 319. | RY* | (10) | C | 7  | 0.00004 | 1.49263  |
| 320. | RY* | (11) | C | 7  | 0.00001 | 1.38395  |
| 321. | RY* | (12) | C | 7  | 0.00000 | 2.13415  |
| 322. | RY* | (13) | C | 7  | 0.00000 | 1.81797  |
| 323. | RY* | (14) | C | 7  | 0.00000 | 21.13564 |
| 324. | RY* | ( 1) | C | 8  | 0.00422 | 1.41034  |
| 325. | RY* | ( 2) | C | 8  | 0.00147 | 0.98907  |
| 326. | RY* | ( 3) | C | 8  | 0.00131 | 0.72525  |
| 327. | RY* | ( 4) | C | 8  | 0.00060 | 1.31926  |
| 328. | RY* | ( 5) | C | 8  | 0.00046 | 1.88926  |
| 329. | RY* | ( 6) | C | 8  | 0.00016 | 2.15460  |
| 330. | RY* | ( 7) | C | 8  | 0.00012 | 1.77243  |
| 331. | RY* | ( 8) | C | 8  | 0.00008 | 1.73219  |
| 332. | RY* | ( 9) | C | 8  | 0.00005 | 2.14760  |
| 333. | RY* | (10) | C | 8  | 0.00004 | 1.49875  |
| 334. | RY* | (11) | C | 8  | 0.00002 | 2.34700  |
| 335. | RY* | (12) | C | 8  | 0.00002 | 1.83220  |
| 336. | RY* | (13) | C | 8  | 0.00002 | 1.70876  |
| 337. | RY* | (14) | C | 8  | 0.00000 | 20.85969 |
| 338. | RY* | ( 1) | N | 9  | 0.00631 | 0.86041  |
| 339. | RY* | ( 2) | N | 9  | 0.00502 | 1.39271  |
| 340. | RY* | ( 3) | N | 9  | 0.00155 | 1.06823  |
| 341. | RY* | ( 4) | N | 9  | 0.00096 | 1.37893  |
| 342. | RY* | ( 5) | N | 9  | 0.00073 | 2.23895  |
| 343. | RY* | ( 6) | N | 9  | 0.00052 | 2.46144  |
| 344. | RY* | ( 7) | N | 9  | 0.00038 | 2.39264  |
| 345. | RY* | ( 8) | N | 9  | 0.00016 | 2.51538  |
| 346. | RY* | ( 9) | N | 9  | 0.00013 | 2.96253  |
| 347. | RY* | (10) | N | 9  | 0.00008 | 3.06821  |
| 348. | RY* | (11) | N | 9  | 0.00006 | 2.84377  |
| 349. | RY* | (12) | N | 9  | 0.00004 | 2.77372  |
| 350. | RY* | (13) | N | 9  | 0.00004 | 2.67353  |
| 351. | RY* | (14) | N | 9  | 0.00000 | 30.12368 |
| 352. | RY* | ( 1) | C | 10 | 0.00546 | 1.64437  |
| 353. | RY* | ( 2) | C | 10 | 0.00341 | 1.46986  |
| 354. | RY* | ( 3) | C | 10 | 0.00210 | 1.67650  |
| 355. | RY* | ( 4) | C | 10 | 0.00162 | 1.58877  |
| 356. | RY* | ( 5) | C | 10 | 0.00138 | 1.07496  |
| 357. | RY* | ( 6) | C | 10 | 0.00126 | 1.41495  |
| 358. | RY* | ( 7) | C | 10 | 0.00112 | 1.91258  |
| 359. | RY* | ( 8) | C | 10 | 0.00064 | 1.57027  |
| 360. | RY* | ( 9) | C | 10 | 0.00036 | 2.96382  |
| 361. | RY* | (10) | C | 10 | 0.00014 | 2.25814  |
| 362. | RY* | (11) | C | 10 | 0.00014 | 2.43904  |
| 363. | RY* | (12) | C | 10 | 0.00008 | 1.90022  |
| 364. | RY* | (13) | C | 10 | 0.00004 | 2.54912  |
| 365. | RY* | (14) | C | 10 | 0.00001 | 20.14700 |
| 366. | RY* | ( 1) | N | 11 | 0.00639 | 0.80441  |
| 367. | RY* | ( 2) | N | 11 | 0.00514 | 1.44081  |
| 368. | RY* | ( 3) | N | 11 | 0.00167 | 1.08092  |
| 369. | RY* | ( 4) | N | 11 | 0.00107 | 1.09744  |
| 370. | RY* | ( 5) | N | 11 | 0.00067 | 2.28666  |
| 371. | RY* | ( 6) | N | 11 | 0.00051 | 2.42712  |
| 372. | RY* | ( 7) | N | 11 | 0.00037 | 2.41100  |
| 373. | RY* | ( 8) | N | 11 | 0.00015 | 3.36672  |
| 374. | RY* | ( 9) | N | 11 | 0.00014 | 2.54294  |
| 375. | RY* | (10) | N | 11 | 0.00010 | 2.71865  |
| 376. | RY* | (11) | N | 11 | 0.00006 | 2.79803  |
| 377. | RY* | (12) | N | 11 | 0.00004 | 2.59223  |
| 378. | RY* | (13) | N | 11 | 0.00005 | 2.76682  |
| 379. | RY* | (14) | N | 11 | 0.00000 | 30.34989 |
| 380. | RY* | ( 1) | C | 12 | 0.00425 | 0.66917  |
| 381. | RY* | ( 2) | C | 12 | 0.00301 | 1.33649  |
| 382. | RY* | ( 3) | C | 12 | 0.00144 | 1.07033  |
| 383. | RY* | ( 4) | C | 12 | 0.00111 | 1.20621  |
| 384. | RY* | ( 5) | C | 12 | 0.00070 | 1.76804  |
| 385. | RY* | ( 6) | C | 12 | 0.00041 | 1.51222  |

|      |     |       |   |    |         |          |
|------|-----|-------|---|----|---------|----------|
| 386. | RY* | ( 7)  | C | 12 | 0.00027 | 1.51459  |
| 387. | RY* | ( 8)  | C | 12 | 0.00016 | 1.58051  |
| 388. | RY* | ( 9)  | C | 12 | 0.00011 | 2.77443  |
| 389. | RY* | ( 10) | C | 12 | 0.00012 | 1.87647  |
| 390. | RY* | ( 11) | C | 12 | 0.00004 | 1.94999  |
| 391. | RY* | ( 12) | C | 12 | 0.00002 | 2.15396  |
| 392. | RY* | ( 13) | C | 12 | 0.00002 | 2.22549  |
| 393. | RY* | ( 14) | C | 12 | 0.00000 | 21.15827 |
| 394. | RY* | ( 1)  | C | 13 | 0.00426 | 0.66640  |
| 395. | RY* | ( 2)  | C | 13 | 0.00304 | 1.32755  |
| 396. | RY* | ( 3)  | C | 13 | 0.00151 | 1.06108  |
| 397. | RY* | ( 4)  | C | 13 | 0.00109 | 1.13615  |
| 398. | RY* | ( 5)  | C | 13 | 0.00069 | 1.77057  |
| 399. | RY* | ( 6)  | C | 13 | 0.00044 | 1.52489  |
| 400. | RY* | ( 7)  | C | 13 | 0.00024 | 1.59842  |
| 401. | RY* | ( 8)  | C | 13 | 0.00015 | 1.54848  |
| 402. | RY* | ( 9)  | C | 13 | 0.00012 | 1.83921  |
| 403. | RY* | ( 10) | C | 13 | 0.00009 | 2.68318  |
| 404. | RY* | ( 11) | C | 13 | 0.00005 | 1.96632  |
| 405. | RY* | ( 12) | C | 13 | 0.00002 | 2.36807  |
| 406. | RY* | ( 13) | C | 13 | 0.00002 | 1.96302  |
| 407. | RY* | ( 14) | C | 13 | 0.00000 | 21.20581 |
| 408. | RY* | ( 1)  | B | 14 | 0.00292 | 1.51642  |
| 409. | RY* | ( 2)  | B | 14 | 0.00140 | 1.12391  |
| 410. | RY* | ( 3)  | B | 14 | 0.00130 | 0.68131  |
| 411. | RY* | ( 4)  | B | 14 | 0.00095 | 1.21312  |
| 412. | RY* | ( 5)  | B | 14 | 0.00063 | 1.82633  |
| 413. | RY* | ( 6)  | B | 14 | 0.00045 | 3.45858  |
| 414. | RY* | ( 7)  | B | 14 | 0.00038 | 2.53228  |
| 415. | RY* | ( 8)  | B | 14 | 0.00037 | 1.32806  |
| 416. | RY* | ( 9)  | B | 14 | 0.00019 | 4.46769  |
| 417. | RY* | ( 10) | B | 14 | 0.00013 | 1.73210  |
| 418. | RY* | ( 11) | B | 14 | 0.00009 | 2.40818  |
| 419. | RY* | ( 12) | B | 14 | 0.00007 | 4.17733  |
| 420. | RY* | ( 13) | B | 14 | 0.00004 | 2.80608  |
| 421. | RY* | ( 14) | B | 14 | 0.00004 | 1.46847  |
| 422. | RY* | ( 1)  | B | 15 | 0.00328 | 1.63071  |
| 423. | RY* | ( 2)  | B | 15 | 0.00182 | 1.36655  |
| 424. | RY* | ( 3)  | B | 15 | 0.00127 | 0.81808  |
| 425. | RY* | ( 4)  | B | 15 | 0.00122 | 0.88663  |
| 426. | RY* | ( 5)  | B | 15 | 0.00116 | 1.23454  |
| 427. | RY* | ( 6)  | B | 15 | 0.00070 | 1.60540  |
| 428. | RY* | ( 7)  | B | 15 | 0.00037 | 1.85419  |
| 429. | RY* | ( 8)  | B | 15 | 0.00028 | 1.91498  |
| 430. | RY* | ( 9)  | B | 15 | 0.00024 | 6.45575  |
| 431. | RY* | ( 10) | B | 15 | 0.00017 | 1.37163  |
| 432. | RY* | ( 11) | B | 15 | 0.00009 | 3.05138  |
| 433. | RY* | ( 12) | B | 15 | 0.00006 | 3.97689  |
| 434. | RY* | ( 13) | B | 15 | 0.00005 | 2.21913  |
| 435. | RY* | ( 14) | B | 15 | 0.00003 | 1.54081  |
| 436. | RY* | ( 1)  | C | 16 | 0.00549 | 1.82074  |
| 437. | RY* | ( 2)  | C | 16 | 0.00277 | 1.24577  |
| 438. | RY* | ( 3)  | C | 16 | 0.00260 | 1.44969  |
| 439. | RY* | ( 4)  | C | 16 | 0.00186 | 1.51680  |
| 440. | RY* | ( 5)  | C | 16 | 0.00133 | 1.53010  |
| 441. | RY* | ( 6)  | C | 16 | 0.00128 | 1.64433  |
| 442. | RY* | ( 7)  | C | 16 | 0.00081 | 1.54722  |
| 443. | RY* | ( 8)  | C | 16 | 0.00077 | 1.62727  |
| 444. | RY* | ( 9)  | C | 16 | 0.00044 | 2.66454  |
| 445. | RY* | ( 10) | C | 16 | 0.00019 | 2.28912  |
| 446. | RY* | ( 11) | C | 16 | 0.00013 | 2.38826  |
| 447. | RY* | ( 12) | C | 16 | 0.00008 | 1.77313  |
| 448. | RY* | ( 13) | C | 16 | 0.00004 | 2.49186  |
| 449. | RY* | ( 14) | C | 16 | 0.00001 | 20.13101 |
| 450. | RY* | ( 1)  | N | 17 | 0.00554 | 1.47691  |
| 451. | RY* | ( 2)  | N | 17 | 0.00483 | 0.74416  |
| 452. | RY* | ( 3)  | N | 17 | 0.00166 | 0.95593  |
| 453. | RY* | ( 4)  | N | 17 | 0.00121 | 1.05250  |
| 454. | RY* | ( 5)  | N | 17 | 0.00075 | 2.26074  |
| 455. | RY* | ( 6)  | N | 17 | 0.00065 | 2.54354  |
| 456. | RY* | ( 7)  | N | 17 | 0.00032 | 2.42112  |

|      |     |       |   |    |         |          |
|------|-----|-------|---|----|---------|----------|
| 457. | RY* | ( 8)  | N | 17 | 0.00014 | 2.57254  |
| 458. | RY* | ( 9)  | N | 17 | 0.00014 | 3.66045  |
| 459. | RY* | ( 10) | N | 17 | 0.00010 | 2.39969  |
| 460. | RY* | ( 11) | N | 17 | 0.00005 | 2.74666  |
| 461. | RY* | ( 12) | N | 17 | 0.00005 | 2.77887  |
| 462. | RY* | ( 13) | N | 17 | 0.00004 | 2.58033  |
| 463. | RY* | ( 14) | N | 17 | 0.00000 | 30.33750 |
| 464. | RY* | ( 1)  | C | 18 | 0.00366 | 0.62106  |
| 465. | RY* | ( 2)  | C | 18 | 0.00314 | 1.33367  |
| 466. | RY* | ( 3)  | C | 18 | 0.00146 | 1.11204  |
| 467. | RY* | ( 4)  | C | 18 | 0.00107 | 1.16292  |
| 468. | RY* | ( 5)  | C | 18 | 0.00069 | 1.73324  |
| 469. | RY* | ( 6)  | C | 18 | 0.00044 | 1.51841  |
| 470. | RY* | ( 7)  | C | 18 | 0.00024 | 1.50709  |
| 471. | RY* | ( 8)  | C | 18 | 0.00016 | 1.55830  |
| 472. | RY* | ( 9)  | C | 18 | 0.00011 | 2.78261  |
| 473. | RY* | ( 10) | C | 18 | 0.00009 | 1.93399  |
| 474. | RY* | ( 11) | C | 18 | 0.00002 | 2.32009  |
| 475. | RY* | ( 12) | C | 18 | 0.00003 | 1.96348  |
| 476. | RY* | ( 13) | C | 18 | 0.00003 | 1.78847  |
| 477. | RY* | ( 14) | C | 18 | 0.00000 | 21.19451 |
| 478. | RY* | ( 1)  | C | 19 | 0.00371 | 0.60162  |
| 479. | RY* | ( 2)  | C | 19 | 0.00308 | 1.28984  |
| 480. | RY* | ( 3)  | C | 19 | 0.00145 | 1.09088  |
| 481. | RY* | ( 4)  | C | 19 | 0.00096 | 1.13833  |
| 482. | RY* | ( 5)  | C | 19 | 0.00064 | 1.74045  |
| 483. | RY* | ( 6)  | C | 19 | 0.00048 | 1.49431  |
| 484. | RY* | ( 7)  | C | 19 | 0.00025 | 1.43770  |
| 485. | RY* | ( 8)  | C | 19 | 0.00014 | 1.44889  |
| 486. | RY* | ( 9)  | C | 19 | 0.00011 | 2.66697  |
| 487. | RY* | ( 10) | C | 19 | 0.00010 | 1.96083  |
| 488. | RY* | ( 11) | C | 19 | 0.00005 | 1.85238  |
| 489. | RY* | ( 12) | C | 19 | 0.00002 | 2.31332  |
| 490. | RY* | ( 13) | C | 19 | 0.00003 | 1.91607  |
| 491. | RY* | ( 14) | C | 19 | 0.00000 | 21.26988 |
| 492. | RY* | ( 1)  | N | 20 | 0.00571 | 1.38800  |
| 493. | RY* | ( 2)  | N | 20 | 0.00498 | 0.83845  |
| 494. | RY* | ( 3)  | N | 20 | 0.00169 | 1.03314  |
| 495. | RY* | ( 4)  | N | 20 | 0.00108 | 1.07873  |
| 496. | RY* | ( 5)  | N | 20 | 0.00071 | 2.23723  |
| 497. | RY* | ( 6)  | N | 20 | 0.00059 | 2.46686  |
| 498. | RY* | ( 7)  | N | 20 | 0.00032 | 2.39518  |
| 499. | RY* | ( 8)  | N | 20 | 0.00014 | 3.73019  |
| 500. | RY* | ( 9)  | N | 20 | 0.00015 | 2.57253  |
| 501. | RY* | ( 10) | N | 20 | 0.00009 | 2.39176  |
| 502. | RY* | ( 11) | N | 20 | 0.00006 | 2.66734  |
| 503. | RY* | ( 12) | N | 20 | 0.00004 | 2.55714  |
| 504. | RY* | ( 13) | N | 20 | 0.00004 | 2.81008  |
| 505. | RY* | ( 14) | N | 20 | 0.00000 | 30.32997 |
| 506. | RY* | ( 1)  | C | 21 | 0.00680 | 1.26166  |
| 507. | RY* | ( 2)  | C | 21 | 0.00357 | 0.75510  |
| 508. | RY* | ( 3)  | C | 21 | 0.00291 | 0.98383  |
| 509. | RY* | ( 4)  | C | 21 | 0.00116 | 1.65958  |
| 510. | RY* | ( 5)  | C | 21 | 0.00089 | 1.97133  |
| 511. | RY* | ( 6)  | C | 21 | 0.00078 | 2.03284  |
| 512. | RY* | ( 7)  | C | 21 | 0.00068 | 1.79172  |
| 513. | RY* | ( 8)  | C | 21 | 0.00043 | 1.67201  |
| 514. | RY* | ( 9)  | C | 21 | 0.00039 | 1.91834  |
| 515. | RY* | ( 10) | C | 21 | 0.00036 | 1.73677  |
| 516. | RY* | ( 11) | C | 21 | 0.00014 | 2.47545  |
| 517. | RY* | ( 12) | C | 21 | 0.00010 | 2.03250  |
| 518. | RY* | ( 13) | C | 21 | 0.00005 | 2.39117  |
| 519. | RY* | ( 14) | C | 21 | 0.00000 | 21.08259 |
| 520. | RY* | ( 1)  | C | 22 | 0.00535 | 1.29617  |
| 521. | RY* | ( 2)  | C | 22 | 0.00398 | 0.68533  |
| 522. | RY* | ( 3)  | C | 22 | 0.00332 | 0.96731  |
| 523. | RY* | ( 4)  | C | 22 | 0.00190 | 1.05795  |
| 524. | RY* | ( 5)  | C | 22 | 0.00075 | 1.77380  |
| 525. | RY* | ( 6)  | C | 22 | 0.00047 | 1.69043  |
| 526. | RY* | ( 7)  | C | 22 | 0.00045 | 1.93423  |
| 527. | RY* | ( 8)  | C | 22 | 0.00033 | 1.89721  |



|      |     |       |   |    |         |          |
|------|-----|-------|---|----|---------|----------|
| 528. | RY* | ( 9)  | C | 22 | 0.00028 | 1.93297  |
| 529. | RY* | ( 10) | C | 22 | 0.00014 | 2.35530  |
| 530. | RY* | ( 11) | C | 22 | 0.00013 | 2.44804  |
| 531. | RY* | ( 12) | C | 22 | 0.00008 | 1.64291  |
| 532. | RY* | ( 13) | C | 22 | 0.00004 | 2.37242  |
| 533. | RY* | ( 14) | C | 22 | 0.00000 | 21.05229 |
| 534. | RY* | ( 1)  | C | 23 | 0.00409 | 1.43011  |
| 535. | RY* | ( 2)  | C | 23 | 0.00148 | 0.85360  |
| 536. | RY* | ( 3)  | C | 23 | 0.00141 | 0.84501  |
| 537. | RY* | ( 4)  | C | 23 | 0.00067 | 1.33279  |
| 538. | RY* | ( 5)  | C | 23 | 0.00046 | 1.86317  |
| 539. | RY* | ( 6)  | C | 23 | 0.00015 | 2.09906  |
| 540. | RY* | ( 7)  | C | 23 | 0.00011 | 1.89271  |
| 541. | RY* | ( 8)  | C | 23 | 0.00009 | 1.63100  |
| 542. | RY* | ( 9)  | C | 23 | 0.00005 | 2.09029  |
| 543. | RY* | ( 10) | C | 23 | 0.00003 | 1.47780  |
| 544. | RY* | ( 11) | C | 23 | 0.00003 | 1.64945  |
| 545. | RY* | ( 12) | C | 23 | 0.00002 | 1.89749  |
| 546. | RY* | ( 13) | C | 23 | 0.00002 | 2.36283  |
| 547. | RY* | ( 14) | C | 23 | 0.00000 | 20.72293 |
| 548. | RY* | ( 1)  | C | 24 | 0.00400 | 1.21961  |
| 549. | RY* | ( 2)  | C | 24 | 0.00185 | 1.20740  |
| 550. | RY* | ( 3)  | C | 24 | 0.00092 | 0.57985  |
| 551. | RY* | ( 4)  | C | 24 | 0.00055 | 1.28574  |
| 552. | RY* | ( 5)  | C | 24 | 0.00048 | 1.75343  |
| 553. | RY* | ( 6)  | C | 24 | 0.00020 | 2.39821  |
| 554. | RY* | ( 7)  | C | 24 | 0.00007 | 1.72726  |
| 555. | RY* | ( 8)  | C | 24 | 0.00005 | 1.56898  |
| 556. | RY* | ( 9)  | C | 24 | 0.00004 | 2.45717  |
| 557. | RY* | ( 10) | C | 24 | 0.00004 | 1.05800  |
| 558. | RY* | ( 11) | C | 24 | 0.00001 | 1.63880  |
| 559. | RY* | ( 12) | C | 24 | 0.00000 | 20.98464 |
| 560. | RY* | ( 13) | C | 24 | 0.00001 | 1.82882  |
| 561. | RY* | ( 14) | C | 24 | 0.00000 | 2.06682  |
| 562. | RY* | ( 1)  | C | 25 | 0.00401 | 1.42687  |
| 563. | RY* | ( 2)  | C | 25 | 0.00145 | 1.09920  |
| 564. | RY* | ( 3)  | C | 25 | 0.00127 | 0.57105  |
| 565. | RY* | ( 4)  | C | 25 | 0.00061 | 1.37236  |
| 566. | RY* | ( 5)  | C | 25 | 0.00048 | 1.86278  |
| 567. | RY* | ( 6)  | C | 25 | 0.00015 | 2.45316  |
| 568. | RY* | ( 7)  | C | 25 | 0.00008 | 1.84181  |
| 569. | RY* | ( 8)  | C | 25 | 0.00006 | 1.33264  |
| 570. | RY* | ( 9)  | C | 25 | 0.00005 | 1.60813  |
| 571. | RY* | ( 10) | C | 25 | 0.00005 | 2.02944  |
| 572. | RY* | ( 11) | C | 25 | 0.00002 | 2.07874  |
| 573. | RY* | ( 12) | C | 25 | 0.00001 | 1.95048  |
| 574. | RY* | ( 13) | C | 25 | 0.00002 | 1.68958  |
| 575. | RY* | ( 14) | C | 25 | 0.00000 | 20.89797 |
| 576. | RY* | ( 1)  | C | 26 | 0.00511 | 1.40275  |
| 577. | RY* | ( 2)  | C | 26 | 0.00300 | 0.79518  |
| 578. | RY* | ( 3)  | C | 26 | 0.00288 | 1.06032  |
| 579. | RY* | ( 4)  | C | 26 | 0.00144 | 1.09941  |
| 580. | RY* | ( 5)  | C | 26 | 0.00075 | 1.82876  |
| 581. | RY* | ( 6)  | C | 26 | 0.00052 | 1.82635  |
| 582. | RY* | ( 7)  | C | 26 | 0.00044 | 1.72988  |
| 583. | RY* | ( 8)  | C | 26 | 0.00028 | 1.88543  |
| 584. | RY* | ( 9)  | C | 26 | 0.00020 | 1.96859  |
| 585. | RY* | ( 10) | C | 26 | 0.00013 | 2.37367  |
| 586. | RY* | ( 11) | C | 26 | 0.00011 | 2.03416  |
| 587. | RY* | ( 12) | C | 26 | 0.00009 | 1.71604  |
| 588. | RY* | ( 13) | C | 26 | 0.00004 | 2.40133  |
| 589. | RY* | ( 14) | C | 26 | 0.00000 | 21.21474 |
| 590. | RY* | ( 1)  | C | 27 | 0.00369 | 1.07451  |
| 591. | RY* | ( 2)  | C | 27 | 0.00170 | 1.01853  |
| 592. | RY* | ( 3)  | C | 27 | 0.00140 | 1.50695  |
| 593. | RY* | ( 4)  | C | 27 | 0.00074 | 1.45826  |
| 594. | RY* | ( 5)  | C | 27 | 0.00059 | 1.45970  |
| 595. | RY* | ( 6)  | C | 27 | 0.00037 | 1.62695  |
| 596. | RY* | ( 7)  | C | 27 | 0.00029 | 1.94461  |
| 597. | RY* | ( 8)  | C | 27 | 0.00025 | 1.97490  |
| 598. | RY* | ( 9)  | C | 27 | 0.00019 | 1.84562  |

|      |     |       |   |    |         |          |
|------|-----|-------|---|----|---------|----------|
| 599. | RY* | ( 10) | C | 27 | 0.00016 | 2.20042  |
| 600. | RY* | ( 11) | C | 27 | 0.00011 | 1.99794  |
| 601. | RY* | ( 12) | C | 27 | 0.00008 | 1.83850  |
| 602. | RY* | ( 13) | C | 27 | 0.00003 | 2.35516  |
| 603. | RY* | ( 14) | C | 27 | 0.00000 | 20.73567 |
| 604. | RY* | ( 1)  | C | 28 | 0.00154 | 0.87861  |
| 605. | RY* | ( 2)  | C | 28 | 0.00098 | 0.88762  |
| 606. | RY* | ( 3)  | C | 28 | 0.00025 | 1.13357  |
| 607. | RY* | ( 4)  | C | 28 | 0.00014 | 1.47420  |
| 608. | RY* | ( 5)  | C | 28 | 0.00011 | 1.99043  |
| 609. | RY* | ( 6)  | C | 28 | 0.00008 | 1.42522  |
| 610. | RY* | ( 7)  | C | 28 | 0.00004 | 1.95821  |
| 611. | RY* | ( 8)  | C | 28 | 0.00003 | 1.48670  |
| 612. | RY* | ( 9)  | C | 28 | 0.00001 | 2.20505  |
| 613. | RY* | ( 10) | C | 28 | 0.00001 | 2.27083  |
| 614. | RY* | ( 11) | C | 28 | 0.00001 | 1.93263  |
| 615. | RY* | ( 12) | C | 28 | 0.00001 | 1.99471  |
| 616. | RY* | ( 13) | C | 28 | 0.00000 | 20.19853 |
| 617. | RY* | ( 14) | C | 28 | 0.00001 | 2.23411  |
| 618. | RY* | ( 1)  | C | 29 | 0.00356 | 1.11446  |
| 619. | RY* | ( 2)  | C | 29 | 0.00128 | 1.56719  |
| 620. | RY* | ( 3)  | C | 29 | 0.00112 | 1.03211  |
| 621. | RY* | ( 4)  | C | 29 | 0.00066 | 1.85552  |
| 622. | RY* | ( 5)  | C | 29 | 0.00050 | 1.68925  |
| 623. | RY* | ( 6)  | C | 29 | 0.00032 | 1.19988  |
| 624. | RY* | ( 7)  | C | 29 | 0.00025 | 1.74781  |
| 625. | RY* | ( 8)  | C | 29 | 0.00026 | 1.99054  |
| 626. | RY* | ( 9)  | C | 29 | 0.00017 | 2.04295  |
| 627. | RY* | ( 10) | C | 29 | 0.00014 | 1.85387  |
| 628. | RY* | ( 11) | C | 29 | 0.00010 | 2.01242  |
| 629. | RY* | ( 12) | C | 29 | 0.00002 | 1.69866  |
| 630. | RY* | ( 13) | C | 29 | 0.00002 | 2.37057  |
| 631. | RY* | ( 14) | C | 29 | 0.00000 | 21.06842 |
| 632. | RY* | ( 1)  | C | 30 | 0.00169 | 0.78371  |
| 633. | RY* | ( 2)  | C | 30 | 0.00101 | 0.81884  |
| 634. | RY* | ( 3)  | C | 30 | 0.00032 | 1.02937  |
| 635. | RY* | ( 4)  | C | 30 | 0.00017 | 1.65150  |
| 636. | RY* | ( 5)  | C | 30 | 0.00010 | 1.82214  |
| 637. | RY* | ( 6)  | C | 30 | 0.00007 | 1.12063  |
| 638. | RY* | ( 7)  | C | 30 | 0.00003 | 2.19296  |
| 639. | RY* | ( 8)  | C | 30 | 0.00003 | 2.18010  |
| 640. | RY* | ( 9)  | C | 30 | 0.00001 | 2.13537  |
| 641. | RY* | ( 10) | C | 30 | 0.00001 | 1.58624  |
| 642. | RY* | ( 11) | C | 30 | 0.00001 | 2.25757  |
| 643. | RY* | ( 12) | C | 30 | 0.00001 | 2.06048  |
| 644. | RY* | ( 13) | C | 30 | 0.00001 | 2.26927  |
| 645. | RY* | ( 14) | C | 30 | 0.00000 | 19.89249 |
| 646. | RY* | ( 1)  | C | 31 | 0.00656 | 1.31066  |
| 647. | RY* | ( 2)  | C | 31 | 0.00339 | 0.74244  |
| 648. | RY* | ( 3)  | C | 31 | 0.00263 | 1.09453  |
| 649. | RY* | ( 4)  | C | 31 | 0.00107 | 1.60023  |
| 650. | RY* | ( 5)  | C | 31 | 0.00083 | 1.88736  |
| 651. | RY* | ( 6)  | C | 31 | 0.00075 | 1.82147  |
| 652. | RY* | ( 7)  | C | 31 | 0.00059 | 1.90762  |
| 653. | RY* | ( 8)  | C | 31 | 0.00044 | 1.64648  |
| 654. | RY* | ( 9)  | C | 31 | 0.00035 | 1.95656  |
| 655. | RY* | ( 10) | C | 31 | 0.00029 | 1.50728  |
| 656. | RY* | ( 11) | C | 31 | 0.00012 | 2.10127  |
| 657. | RY* | ( 12) | C | 31 | 0.00013 | 2.42316  |
| 658. | RY* | ( 13) | C | 31 | 0.00005 | 2.37701  |
| 659. | RY* | ( 14) | C | 31 | 0.00000 | 21.52271 |
| 660. | RY* | ( 1)  | C | 32 | 0.00502 | 1.40023  |
| 661. | RY* | ( 2)  | C | 32 | 0.00294 | 0.92683  |
| 662. | RY* | ( 3)  | C | 32 | 0.00278 | 0.87766  |
| 663. | RY* | ( 4)  | C | 32 | 0.00147 | 1.00288  |
| 664. | RY* | ( 5)  | C | 32 | 0.00065 | 1.85859  |
| 665. | RY* | ( 6)  | C | 32 | 0.00051 | 1.58302  |
| 666. | RY* | ( 7)  | C | 32 | 0.00049 | 1.83714  |
| 667. | RY* | ( 8)  | C | 32 | 0.00028 | 1.84133  |
| 668. | RY* | ( 9)  | C | 32 | 0.00021 | 1.90270  |
| 669. | RY* | ( 10) | C | 32 | 0.00015 | 2.23087  |

|      |     |       |   |    |         |          |
|------|-----|-------|---|----|---------|----------|
| 670. | RY* | ( 11) | C | 32 | 0.00012 | 2.32600  |
| 671. | RY* | ( 12) | C | 32 | 0.00007 | 1.62840  |
| 672. | RY* | ( 13) | C | 32 | 0.00004 | 2.43843  |
| 673. | RY* | ( 14) | C | 32 | 0.00000 | 21.02273 |
| 674. | RY* | ( 1)  | C | 33 | 0.00405 | 1.42094  |
| 675. | RY* | ( 2)  | C | 33 | 0.00148 | 0.92574  |
| 676. | RY* | ( 3)  | C | 33 | 0.00134 | 0.73533  |
| 677. | RY* | ( 4)  | C | 33 | 0.00059 | 1.30583  |
| 678. | RY* | ( 5)  | C | 33 | 0.00046 | 1.84583  |
| 679. | RY* | ( 6)  | C | 33 | 0.00015 | 2.35714  |
| 680. | RY* | ( 7)  | C | 33 | 0.00009 | 1.60427  |
| 681. | RY* | ( 8)  | C | 33 | 0.00008 | 1.76578  |
| 682. | RY* | ( 9)  | C | 33 | 0.00005 | 2.02875  |
| 683. | RY* | ( 10) | C | 33 | 0.00004 | 1.29388  |
| 684. | RY* | ( 11) | C | 33 | 0.00003 | 2.02721  |
| 685. | RY* | ( 12) | C | 33 | 0.00002 | 1.77069  |
| 686. | RY* | ( 13) | C | 33 | 0.00001 | 2.25693  |
| 687. | RY* | ( 14) | C | 33 | 0.00000 | 20.72953 |
| 688. | RY* | ( 1)  | C | 34 | 0.00413 | 1.20527  |
| 689. | RY* | ( 2)  | C | 34 | 0.00186 | 1.19862  |
| 690. | RY* | ( 3)  | C | 34 | 0.00087 | 0.60028  |
| 691. | RY* | ( 4)  | C | 34 | 0.00054 | 1.21976  |
| 692. | RY* | ( 5)  | C | 34 | 0.00052 | 1.81578  |
| 693. | RY* | ( 6)  | C | 34 | 0.00019 | 2.48350  |
| 694. | RY* | ( 7)  | C | 34 | 0.00007 | 1.75117  |
| 695. | RY* | ( 8)  | C | 34 | 0.00005 | 1.56793  |
| 696. | RY* | ( 9)  | C | 34 | 0.00003 | 1.20830  |
| 697. | RY* | ( 10) | C | 34 | 0.00003 | 2.32334  |
| 698. | RY* | ( 11) | C | 34 | 0.00003 | 1.34390  |
| 699. | RY* | ( 12) | C | 34 | 0.00000 | 21.19523 |
| 700. | RY* | ( 13) | C | 34 | 0.00000 | 2.11279  |
| 701. | RY* | ( 14) | C | 34 | 0.00001 | 1.84082  |
| 702. | RY* | ( 1)  | C | 35 | 0.00425 | 1.39464  |
| 703. | RY* | ( 2)  | C | 35 | 0.00143 | 1.08223  |
| 704. | RY* | ( 3)  | C | 35 | 0.00118 | 0.58165  |
| 705. | RY* | ( 4)  | C | 35 | 0.00061 | 1.33642  |
| 706. | RY* | ( 5)  | C | 35 | 0.00048 | 1.89269  |
| 707. | RY* | ( 6)  | C | 35 | 0.00015 | 2.36928  |
| 708. | RY* | ( 7)  | C | 35 | 0.00009 | 1.53356  |
| 709. | RY* | ( 8)  | C | 35 | 0.00009 | 1.81178  |
| 710. | RY* | ( 9)  | C | 35 | 0.00007 | 1.69662  |
| 711. | RY* | ( 10) | C | 35 | 0.00004 | 1.81889  |
| 712. | RY* | ( 11) | C | 35 | 0.00002 | 2.39680  |
| 713. | RY* | ( 12) | C | 35 | 0.00002 | 1.71308  |
| 714. | RY* | ( 13) | C | 35 | 0.00002 | 1.75749  |
| 715. | RY* | ( 14) | C | 35 | 0.00000 | 20.97916 |
| 716. | RY* | ( 1)  | C | 36 | 0.00522 | 1.38785  |
| 717. | RY* | ( 2)  | C | 36 | 0.00289 | 1.11489  |
| 718. | RY* | ( 3)  | C | 36 | 0.00273 | 0.78591  |
| 719. | RY* | ( 4)  | C | 36 | 0.00147 | 1.00443  |
| 720. | RY* | ( 5)  | C | 36 | 0.00078 | 1.72002  |
| 721. | RY* | ( 6)  | C | 36 | 0.00050 | 1.86882  |
| 722. | RY* | ( 7)  | C | 36 | 0.00044 | 1.76751  |
| 723. | RY* | ( 8)  | C | 36 | 0.00027 | 1.83754  |
| 724. | RY* | ( 9)  | C | 36 | 0.00020 | 1.96710  |
| 725. | RY* | ( 10) | C | 36 | 0.00011 | 2.23224  |
| 726. | RY* | ( 11) | C | 36 | 0.00012 | 2.38816  |
| 727. | RY* | ( 12) | C | 36 | 0.00007 | 1.50722  |
| 728. | RY* | ( 13) | C | 36 | 0.00004 | 2.41555  |
| 729. | RY* | ( 14) | C | 36 | 0.00000 | 21.10423 |
| 730. | RY* | ( 1)  | C | 37 | 0.00347 | 1.11172  |
| 731. | RY* | ( 2)  | C | 37 | 0.00128 | 1.55433  |
| 732. | RY* | ( 3)  | C | 37 | 0.00115 | 1.04105  |
| 733. | RY* | ( 4)  | C | 37 | 0.00063 | 1.85777  |
| 734. | RY* | ( 5)  | C | 37 | 0.00052 | 1.61670  |
| 735. | RY* | ( 6)  | C | 37 | 0.00034 | 1.34701  |
| 736. | RY* | ( 7)  | C | 37 | 0.00026 | 2.03953  |
| 737. | RY* | ( 8)  | C | 37 | 0.00024 | 1.69003  |
| 738. | RY* | ( 9)  | C | 37 | 0.00017 | 2.09726  |
| 739. | RY* | ( 10) | C | 37 | 0.00014 | 1.54559  |
| 740. | RY* | ( 11) | C | 37 | 0.00011 | 2.21133  |

|      |     |       |   |    |         |          |
|------|-----|-------|---|----|---------|----------|
| 741. | RY* | ( 12) | C | 37 | 0.00002 | 2.34541  |
| 742. | RY* | ( 13) | C | 37 | 0.00002 | 1.60226  |
| 743. | RY* | ( 14) | C | 37 | 0.00000 | 21.05146 |
| 744. | RY* | ( 1)  | C | 38 | 0.00174 | 0.76422  |
| 745. | RY* | ( 2)  | C | 38 | 0.00102 | 0.79899  |
| 746. | RY* | ( 3)  | C | 38 | 0.00031 | 1.04405  |
| 747. | RY* | ( 4)  | C | 38 | 0.00018 | 1.63725  |
| 748. | RY* | ( 5)  | C | 38 | 0.00009 | 2.10488  |
| 749. | RY* | ( 6)  | C | 38 | 0.00007 | 1.07652  |
| 750. | RY* | ( 7)  | C | 38 | 0.00003 | 2.03099  |
| 751. | RY* | ( 8)  | C | 38 | 0.00003 | 2.21275  |
| 752. | RY* | ( 9)  | C | 38 | 0.00001 | 2.17802  |
| 753. | RY* | ( 10) | C | 38 | 0.00000 | 2.14706  |
| 754. | RY* | ( 11) | C | 38 | 0.00001 | 1.44735  |
| 755. | RY* | ( 12) | C | 38 | 0.00000 | 20.03623 |
| 756. | RY* | ( 13) | C | 38 | 0.00001 | 2.12395  |
| 757. | RY* | ( 14) | C | 38 | 0.00001 | 2.17525  |
| 758. | RY* | ( 1)  | C | 39 | 0.00358 | 1.11088  |
| 759. | RY* | ( 2)  | C | 39 | 0.00126 | 1.56478  |
| 760. | RY* | ( 3)  | C | 39 | 0.00115 | 1.10332  |
| 761. | RY* | ( 4)  | C | 39 | 0.00064 | 1.82355  |
| 762. | RY* | ( 5)  | C | 39 | 0.00052 | 1.61346  |
| 763. | RY* | ( 6)  | C | 39 | 0.00031 | 1.38491  |
| 764. | RY* | ( 7)  | C | 39 | 0.00026 | 1.90043  |
| 765. | RY* | ( 8)  | C | 39 | 0.00021 | 1.75763  |
| 766. | RY* | ( 9)  | C | 39 | 0.00017 | 1.77728  |
| 767. | RY* | ( 10) | C | 39 | 0.00014 | 1.94923  |
| 768. | RY* | ( 11) | C | 39 | 0.00010 | 2.13538  |
| 769. | RY* | ( 12) | C | 39 | 0.00002 | 2.36335  |
| 770. | RY* | ( 13) | C | 39 | 0.00002 | 1.72160  |
| 771. | RY* | ( 14) | C | 39 | 0.00000 | 21.10891 |
| 772. | RY* | ( 1)  | C | 40 | 0.00162 | 0.80115  |
| 773. | RY* | ( 2)  | C | 40 | 0.00097 | 0.86810  |
| 774. | RY* | ( 3)  | C | 40 | 0.00029 | 1.09501  |
| 775. | RY* | ( 4)  | C | 40 | 0.00015 | 1.57837  |
| 776. | RY* | ( 5)  | C | 40 | 0.00010 | 1.90747  |
| 777. | RY* | ( 6)  | C | 40 | 0.00007 | 1.07427  |
| 778. | RY* | ( 7)  | C | 40 | 0.00002 | 2.39826  |
| 779. | RY* | ( 8)  | C | 40 | 0.00002 | 2.16151  |
| 780. | RY* | ( 9)  | C | 40 | 0.00003 | 1.83712  |
| 781. | RY* | ( 10) | C | 40 | 0.00001 | 1.91058  |
| 782. | RY* | ( 11) | C | 40 | 0.00001 | 2.28483  |
| 783. | RY* | ( 12) | C | 40 | 0.00000 | 19.75255 |
| 784. | RY* | ( 13) | C | 40 | 0.00000 | 2.05289  |
| 785. | RY* | ( 14) | C | 40 | 0.00000 | 2.07569  |
| 786. | RY* | ( 1)  | C | 41 | 0.00651 | 1.29334  |
| 787. | RY* | ( 2)  | C | 41 | 0.00320 | 0.78456  |
| 788. | RY* | ( 3)  | C | 41 | 0.00141 | 1.46775  |
| 789. | RY* | ( 4)  | C | 41 | 0.00100 | 1.60672  |
| 790. | RY* | ( 5)  | C | 41 | 0.00082 | 1.73202  |
| 791. | RY* | ( 6)  | C | 41 | 0.00072 | 1.85729  |
| 792. | RY* | ( 7)  | C | 41 | 0.00041 | 1.59003  |
| 793. | RY* | ( 8)  | C | 41 | 0.00039 | 1.60768  |
| 794. | RY* | ( 9)  | C | 41 | 0.00033 | 1.79911  |
| 795. | RY* | ( 10) | C | 41 | 0.00014 | 2.52782  |
| 796. | RY* | ( 11) | C | 41 | 0.00010 | 2.00438  |
| 797. | RY* | ( 12) | C | 41 | 0.00005 | 2.42632  |
| 798. | RY* | ( 13) | C | 41 | 0.00000 | 21.49869 |
| 799. | RY* | ( 1)  | C | 42 | 0.00502 | 1.37073  |
| 800. | RY* | ( 2)  | C | 42 | 0.00306 | 1.05399  |
| 801. | RY* | ( 3)  | C | 42 | 0.00236 | 0.83093  |
| 802. | RY* | ( 4)  | C | 42 | 0.00137 | 1.01323  |
| 803. | RY* | ( 5)  | C | 42 | 0.00065 | 1.79599  |
| 804. | RY* | ( 6)  | C | 42 | 0.00050 | 1.66194  |
| 805. | RY* | ( 7)  | C | 42 | 0.00042 | 1.84188  |
| 806. | RY* | ( 8)  | C | 42 | 0.00033 | 1.94340  |
| 807. | RY* | ( 9)  | C | 42 | 0.00024 | 1.86148  |
| 808. | RY* | ( 10) | C | 42 | 0.00013 | 2.39967  |
| 809. | RY* | ( 11) | C | 42 | 0.00012 | 2.32188  |
| 810. | RY* | ( 12) | C | 42 | 0.00007 | 1.49644  |
| 811. | RY* | ( 13) | C | 42 | 0.00004 | 2.40081  |

|      |     |       |   |    |         |          |
|------|-----|-------|---|----|---------|----------|
| 812. | RY* | ( 14) | C | 42 | 0.00000 | 21.24455 |
| 813. | RY* | ( 1)  | C | 43 | 0.00409 | 1.42440  |
| 814. | RY* | ( 2)  | C | 43 | 0.00153 | 0.74522  |
| 815. | RY* | ( 3)  | C | 43 | 0.00136 | 0.89835  |
| 816. | RY* | ( 4)  | C | 43 | 0.00060 | 1.31234  |
| 817. | RY* | ( 5)  | C | 43 | 0.00047 | 1.89305  |
| 818. | RY* | ( 6)  | C | 43 | 0.00015 | 2.13339  |
| 819. | RY* | ( 7)  | C | 43 | 0.00012 | 1.76076  |
| 820. | RY* | ( 8)  | C | 43 | 0.00007 | 1.72613  |
| 821. | RY* | ( 9)  | C | 43 | 0.00006 | 1.54950  |
| 822. | RY* | ( 10) | C | 43 | 0.00005 | 2.18092  |
| 823. | RY* | ( 11) | C | 43 | 0.00002 | 1.60456  |
| 824. | RY* | ( 12) | C | 43 | 0.00002 | 2.05788  |
| 825. | RY* | ( 13) | C | 43 | 0.00002 | 2.17061  |
| 826. | RY* | ( 14) | C | 43 | 0.00000 | 20.69190 |
| 827. | RY* | ( 1)  | C | 44 | 0.00417 | 1.19292  |
| 828. | RY* | ( 2)  | C | 44 | 0.00187 | 1.19094  |
| 829. | RY* | ( 3)  | C | 44 | 0.00089 | 0.57026  |
| 830. | RY* | ( 4)  | C | 44 | 0.00051 | 1.14427  |
| 831. | RY* | ( 5)  | C | 44 | 0.00051 | 1.89391  |
| 832. | RY* | ( 6)  | C | 44 | 0.00020 | 2.41379  |
| 833. | RY* | ( 7)  | C | 44 | 0.00008 | 1.44881  |
| 834. | RY* | ( 8)  | C | 44 | 0.00007 | 1.86756  |
| 835. | RY* | ( 9)  | C | 44 | 0.00004 | 1.10283  |
| 836. | RY* | ( 10) | C | 44 | 0.00004 | 2.40962  |
| 837. | RY* | ( 11) | C | 44 | 0.00001 | 1.48713  |
| 838. | RY* | ( 12) | C | 44 | 0.00000 | 21.10410 |
| 839. | RY* | ( 13) | C | 44 | 0.00000 | 1.95213  |
| 840. | RY* | ( 14) | C | 44 | 0.00000 | 1.99776  |
| 841. | RY* | ( 1)  | C | 45 | 0.00417 | 1.41751  |
| 842. | RY* | ( 2)  | C | 45 | 0.00144 | 1.10804  |
| 843. | RY* | ( 3)  | C | 45 | 0.00134 | 0.52591  |
| 844. | RY* | ( 4)  | C | 45 | 0.00061 | 1.31931  |
| 845. | RY* | ( 5)  | C | 45 | 0.00049 | 1.88409  |
| 846. | RY* | ( 6)  | C | 45 | 0.00015 | 2.43395  |
| 847. | RY* | ( 7)  | C | 45 | 0.00010 | 1.72748  |
| 848. | RY* | ( 8)  | C | 45 | 0.00008 | 1.61927  |
| 849. | RY* | ( 9)  | C | 45 | 0.00005 | 1.83285  |
| 850. | RY* | ( 10) | C | 45 | 0.00006 | 1.47902  |
| 851. | RY* | ( 11) | C | 45 | 0.00002 | 1.73710  |
| 852. | RY* | ( 12) | C | 45 | 0.00002 | 1.72581  |
| 853. | RY* | ( 13) | C | 45 | 0.00001 | 2.52772  |
| 854. | RY* | ( 14) | C | 45 | 0.00000 | 20.81206 |
| 855. | RY* | ( 1)  | C | 46 | 0.00513 | 1.39508  |
| 856. | RY* | ( 2)  | C | 46 | 0.00295 | 1.13359  |
| 857. | RY* | ( 3)  | C | 46 | 0.00289 | 0.73772  |
| 858. | RY* | ( 4)  | C | 46 | 0.00146 | 0.99230  |
| 859. | RY* | ( 5)  | C | 46 | 0.00067 | 1.84337  |
| 860. | RY* | ( 6)  | C | 46 | 0.00052 | 1.77018  |
| 861. | RY* | ( 7)  | C | 46 | 0.00049 | 1.77683  |
| 862. | RY* | ( 8)  | C | 46 | 0.00029 | 1.85810  |
| 863. | RY* | ( 9)  | C | 46 | 0.00020 | 1.85277  |
| 864. | RY* | ( 10) | C | 46 | 0.00012 | 2.18111  |
| 865. | RY* | ( 11) | C | 46 | 0.00013 | 2.45043  |
| 866. | RY* | ( 12) | C | 46 | 0.00009 | 1.57850  |
| 867. | RY* | ( 13) | C | 46 | 0.00004 | 2.44708  |
| 868. | RY* | ( 14) | C | 46 | 0.00000 | 21.14819 |
| 869. | RY* | ( 1)  | C | 47 | 0.00368 | 1.05182  |
| 870. | RY* | ( 2)  | C | 47 | 0.00178 | 1.12326  |
| 871. | RY* | ( 3)  | C | 47 | 0.00140 | 1.07268  |
| 872. | RY* | ( 4)  | C | 47 | 0.00067 | 1.35637  |
| 873. | RY* | ( 5)  | C | 47 | 0.00059 | 1.81766  |
| 874. | RY* | ( 6)  | C | 47 | 0.00042 | 1.61515  |
| 875. | RY* | ( 7)  | C | 47 | 0.00029 | 2.12143  |
| 876. | RY* | ( 8)  | C | 47 | 0.00030 | 1.93697  |
| 877. | RY* | ( 9)  | C | 47 | 0.00023 | 2.00734  |
| 878. | RY* | ( 10) | C | 47 | 0.00013 | 2.15006  |
| 879. | RY* | ( 11) | C | 47 | 0.00011 | 1.91547  |
| 880. | RY* | ( 12) | C | 47 | 0.00011 | 2.10256  |
| 881. | RY* | ( 13) | C | 47 | 0.00003 | 2.40793  |
| 882. | RY* | ( 14) | C | 47 | 0.00000 | 20.59374 |

|      |      |     |   |    |         |          |
|------|------|-----|---|----|---------|----------|
| 883. | RY*( | 1)  | C | 48 | 0.00153 | 0.89739  |
| 884. | RY*( | 2)  | C | 48 | 0.00099 | 0.88917  |
| 885. | RY*( | 3)  | C | 48 | 0.00029 | 1.10237  |
| 886. | RY*( | 4)  | C | 48 | 0.00011 | 1.53479  |
| 887. | RY*( | 5)  | C | 48 | 0.00012 | 1.92114  |
| 888. | RY*( | 6)  | C | 48 | 0.00007 | 1.41484  |
| 889. | RY*( | 7)  | C | 48 | 0.00004 | 1.82710  |
| 890. | RY*( | 8)  | C | 48 | 0.00003 | 1.78266  |
| 891. | RY*( | 9)  | C | 48 | 0.00002 | 2.15469  |
| 892. | RY*( | 10) | C | 48 | 0.00000 | 20.26540 |
| 893. | RY*( | 11) | C | 48 | 0.00001 | 2.18503  |
| 894. | RY*( | 12) | C | 48 | 0.00001 | 2.37077  |
| 895. | RY*( | 13) | C | 48 | 0.00001 | 1.87255  |
| 896. | RY*( | 14) | C | 48 | 0.00000 | 1.99554  |
| 897. | RY*( | 1)  | C | 49 | 0.00367 | 1.11390  |
| 898. | RY*( | 2)  | C | 49 | 0.00133 | 1.50354  |
| 899. | RY*( | 3)  | C | 49 | 0.00128 | 0.97614  |
| 900. | RY*( | 4)  | C | 49 | 0.00068 | 1.82033  |
| 901. | RY*( | 5)  | C | 49 | 0.00050 | 1.71271  |
| 902. | RY*( | 6)  | C | 49 | 0.00034 | 1.18764  |
| 903. | RY*( | 7)  | C | 49 | 0.00026 | 2.01543  |
| 904. | RY*( | 8)  | C | 49 | 0.00027 | 1.85296  |
| 905. | RY*( | 9)  | C | 49 | 0.00018 | 2.07750  |
| 906. | RY*( | 10) | C | 49 | 0.00015 | 1.94249  |
| 907. | RY*( | 11) | C | 49 | 0.00009 | 1.93912  |
| 908. | RY*( | 12) | C | 49 | 0.00002 | 2.40316  |
| 909. | RY*( | 13) | C | 49 | 0.00003 | 1.73871  |
| 910. | RY*( | 14) | C | 49 | 0.00000 | 21.05163 |
| 911. | RY*( | 1)  | C | 50 | 0.00165 | 0.78947  |
| 912. | RY*( | 2)  | C | 50 | 0.00104 | 0.81353  |
| 913. | RY*( | 3)  | C | 50 | 0.00038 | 1.03892  |
| 914. | RY*( | 4)  | C | 50 | 0.00016 | 1.64499  |
| 915. | RY*( | 5)  | C | 50 | 0.00011 | 1.59273  |
| 916. | RY*( | 6)  | C | 50 | 0.00008 | 1.35592  |
| 917. | RY*( | 7)  | C | 50 | 0.00002 | 2.58044  |
| 918. | RY*( | 8)  | C | 50 | 0.00003 | 2.01151  |
| 919. | RY*( | 9)  | C | 50 | 0.00002 | 2.21122  |
| 920. | RY*( | 10) | C | 50 | 0.00001 | 1.77478  |
| 921. | RY*( | 11) | C | 50 | 0.00000 | 19.86859 |
| 922. | RY*( | 12) | C | 50 | 0.00000 | 1.96082  |
| 923. | RY*( | 13) | C | 50 | 0.00001 | 2.05054  |
| 924. | RY*( | 14) | C | 50 | 0.00001 | 2.13968  |
| 925. | RY*( | 1)  | C | 51 | 0.00364 | 1.11878  |
| 926. | RY*( | 2)  | C | 51 | 0.00135 | 1.51456  |
| 927. | RY*( | 3)  | C | 51 | 0.00123 | 0.97902  |
| 928. | RY*( | 4)  | C | 51 | 0.00063 | 1.87977  |
| 929. | RY*( | 5)  | C | 51 | 0.00048 | 1.75478  |
| 930. | RY*( | 6)  | C | 51 | 0.00035 | 1.22905  |
| 931. | RY*( | 7)  | C | 51 | 0.00026 | 2.02870  |
| 932. | RY*( | 8)  | C | 51 | 0.00025 | 1.78002  |
| 933. | RY*( | 9)  | C | 51 | 0.00018 | 2.13643  |
| 934. | RY*( | 10) | C | 51 | 0.00013 | 1.77343  |
| 935. | RY*( | 11) | C | 51 | 0.00010 | 2.00360  |
| 936. | RY*( | 12) | C | 51 | 0.00003 | 1.59978  |
| 937. | RY*( | 13) | C | 51 | 0.00002 | 2.40986  |
| 938. | RY*( | 14) | C | 51 | 0.00000 | 20.96727 |
| 939. | RY*( | 1)  | C | 52 | 0.00168 | 0.78408  |
| 940. | RY*( | 2)  | C | 52 | 0.00104 | 0.79820  |
| 941. | RY*( | 3)  | C | 52 | 0.00037 | 1.03305  |
| 942. | RY*( | 4)  | C | 52 | 0.00017 | 1.63770  |
| 943. | RY*( | 5)  | C | 52 | 0.00011 | 1.76026  |
| 944. | RY*( | 6)  | C | 52 | 0.00008 | 1.24998  |
| 945. | RY*( | 7)  | C | 52 | 0.00002 | 2.01962  |
| 946. | RY*( | 8)  | C | 52 | 0.00001 | 1.49881  |
| 947. | RY*( | 9)  | C | 52 | 0.00001 | 2.92172  |
| 948. | RY*( | 10) | C | 52 | 0.00001 | 2.23886  |
| 949. | RY*( | 11) | C | 52 | 0.00002 | 2.28413  |
| 950. | RY*( | 12) | C | 52 | 0.00002 | 1.88797  |
| 951. | RY*( | 13) | C | 52 | 0.00000 | 19.55501 |
| 952. | RY*( | 14) | C | 52 | 0.00001 | 2.18088  |
| 953. | RY*( | 1)  | C | 53 | 0.00371 | 1.04881  |

|       |     |      |      |         |          |
|-------|-----|------|------|---------|----------|
| 954.  | RY* | ( 2) | C 53 | 0.00163 | 1.11006  |
| 955.  | RY* | ( 3) | C 53 | 0.00137 | 1.18159  |
| 956.  | RY* | ( 4) | C 53 | 0.00073 | 1.28911  |
| 957.  | RY* | ( 5) | C 53 | 0.00061 | 1.82151  |
| 958.  | RY* | ( 6) | C 53 | 0.00039 | 1.61798  |
| 959.  | RY* | ( 7) | C 53 | 0.00032 | 1.85403  |
| 960.  | RY* | ( 8) | C 53 | 0.00029 | 2.11923  |
| 961.  | RY* | ( 9) | C 53 | 0.00021 | 2.09148  |
| 962.  | RY* | (10) | C 53 | 0.00013 | 2.16627  |
| 963.  | RY* | (11) | C 53 | 0.00010 | 1.99784  |
| 964.  | RY* | (12) | C 53 | 0.00011 | 1.95924  |
| 965.  | RY* | (13) | C 53 | 0.00003 | 2.41283  |
| 966.  | RY* | (14) | C 53 | 0.00000 | 20.60996 |
| 967.  | RY* | ( 1) | C 54 | 0.00150 | 0.88589  |
| 968.  | RY* | ( 2) | C 54 | 0.00097 | 0.90000  |
| 969.  | RY* | ( 3) | C 54 | 0.00026 | 1.13126  |
| 970.  | RY* | ( 4) | C 54 | 0.00011 | 2.06076  |
| 971.  | RY* | ( 5) | C 54 | 0.00012 | 1.46467  |
| 972.  | RY* | ( 6) | C 54 | 0.00007 | 1.33664  |
| 973.  | RY* | ( 7) | C 54 | 0.00003 | 1.95964  |
| 974.  | RY* | ( 8) | C 54 | 0.00003 | 1.59809  |
| 975.  | RY* | ( 9) | C 54 | 0.00003 | 2.13764  |
| 976.  | RY* | (10) | C 54 | 0.00001 | 2.26031  |
| 977.  | RY* | (11) | C 54 | 0.00001 | 1.89090  |
| 978.  | RY* | (12) | C 54 | 0.00000 | 2.13906  |
| 979.  | RY* | (13) | C 54 | 0.00001 | 2.09598  |
| 980.  | RY* | (14) | C 54 | 0.00000 | 20.25877 |
| 981.  | RY* | ( 1) | C 55 | 0.00160 | 0.94782  |
| 982.  | RY* | ( 2) | C 55 | 0.00113 | 0.97102  |
| 983.  | RY* | ( 3) | C 55 | 0.00043 | 0.91350  |
| 984.  | RY* | ( 4) | C 55 | 0.00016 | 1.21927  |
| 985.  | RY* | ( 5) | C 55 | 0.00015 | 1.74633  |
| 986.  | RY* | ( 6) | C 55 | 0.00009 | 1.80177  |
| 987.  | RY* | ( 7) | C 55 | 0.00009 | 2.38474  |
| 988.  | RY* | ( 8) | C 55 | 0.00004 | 1.53856  |
| 989.  | RY* | ( 9) | C 55 | 0.00004 | 2.25705  |
| 990.  | RY* | (10) | C 55 | 0.00001 | 2.28460  |
| 991.  | RY* | (11) | C 55 | 0.00002 | 1.87601  |
| 992.  | RY* | (12) | C 55 | 0.00000 | 20.47851 |
| 993.  | RY* | (13) | C 55 | 0.00001 | 2.43918  |
| 994.  | RY* | (14) | C 55 | 0.00001 | 2.36213  |
| 995.  | RY* | ( 1) | C 56 | 0.00167 | 0.94447  |
| 996.  | RY* | ( 2) | C 56 | 0.00111 | 0.93842  |
| 997.  | RY* | ( 3) | C 56 | 0.00050 | 0.85093  |
| 998.  | RY* | ( 4) | C 56 | 0.00022 | 1.38867  |
| 999.  | RY* | ( 5) | C 56 | 0.00013 | 1.83983  |
| 1000. | RY* | ( 6) | C 56 | 0.00010 | 1.74745  |
| 1001. | RY* | ( 7) | C 56 | 0.00004 | 1.61105  |
| 1002. | RY* | ( 8) | C 56 | 0.00005 | 2.25446  |
| 1003. | RY* | ( 9) | C 56 | 0.00003 | 2.25304  |
| 1004. | RY* | (10) | C 56 | 0.00001 | 2.04739  |
| 1005. | RY* | (11) | C 56 | 0.00001 | 2.44828  |
| 1006. | RY* | (12) | C 56 | 0.00001 | 2.46074  |
| 1007. | RY* | (13) | C 56 | 0.00001 | 2.05515  |
| 1008. | RY* | (14) | C 56 | 0.00000 | 20.55252 |
| 1009. | RY* | ( 1) | C 57 | 0.00187 | 0.77907  |
| 1010. | RY* | ( 2) | C 57 | 0.00134 | 0.85389  |
| 1011. | RY* | ( 3) | C 57 | 0.00047 | 1.11156  |
| 1012. | RY* | ( 4) | C 57 | 0.00025 | 1.36688  |
| 1013. | RY* | ( 5) | C 57 | 0.00018 | 1.58546  |
| 1014. | RY* | ( 6) | C 57 | 0.00015 | 1.71453  |
| 1015. | RY* | ( 7) | C 57 | 0.00008 | 2.19414  |
| 1016. | RY* | ( 8) | C 57 | 0.00006 | 2.03248  |
| 1017. | RY* | ( 9) | C 57 | 0.00002 | 2.37263  |
| 1018. | RY* | (10) | C 57 | 0.00003 | 2.00210  |
| 1019. | RY* | (11) | C 57 | 0.00002 | 2.54372  |
| 1020. | RY* | (12) | C 57 | 0.00001 | 2.32326  |
| 1021. | RY* | (13) | C 57 | 0.00000 | 20.15294 |
| 1022. | RY* | (14) | C 57 | 0.00000 | 2.03972  |
| 1023. | RY* | ( 1) | C 58 | 0.00156 | 0.94167  |
| 1024. | RY* | ( 2) | C 58 | 0.00112 | 0.89956  |

|       |     |       |   |    |         |          |
|-------|-----|-------|---|----|---------|----------|
| 1025. | RY* | ( 3)  | C | 58 | 0.00046 | 0.83136  |
| 1026. | RY* | ( 4)  | C | 58 | 0.00018 | 1.37691  |
| 1027. | RY* | ( 5)  | C | 58 | 0.00014 | 1.56610  |
| 1028. | RY* | ( 6)  | C | 58 | 0.00010 | 1.86396  |
| 1029. | RY* | ( 7)  | C | 58 | 0.00006 | 2.20712  |
| 1030. | RY* | ( 8)  | C | 58 | 0.00004 | 1.37507  |
| 1031. | RY* | ( 9)  | C | 58 | 0.00004 | 2.29307  |
| 1032. | RY* | ( 10) | C | 58 | 0.00001 | 2.21946  |
| 1033. | RY* | ( 11) | C | 58 | 0.00001 | 2.39688  |
| 1034. | RY* | ( 12) | C | 58 | 0.00001 | 2.45795  |
| 1035. | RY* | ( 13) | C | 58 | 0.00001 | 2.08113  |
| 1036. | RY* | ( 14) | C | 58 | 0.00000 | 20.38982 |
| 1037. | RY* | ( 1)  | C | 59 | 0.00167 | 0.85200  |
| 1038. | RY* | ( 2)  | C | 59 | 0.00108 | 0.91695  |
| 1039. | RY* | ( 3)  | C | 59 | 0.00050 | 0.87151  |
| 1040. | RY* | ( 4)  | C | 59 | 0.00021 | 1.09802  |
| 1041. | RY* | ( 5)  | C | 59 | 0.00016 | 1.67367  |
| 1042. | RY* | ( 6)  | C | 59 | 0.00010 | 2.17597  |
| 1043. | RY* | ( 7)  | C | 59 | 0.00008 | 2.26738  |
| 1044. | RY* | ( 8)  | C | 59 | 0.00005 | 1.71348  |
| 1045. | RY* | ( 9)  | C | 59 | 0.00004 | 1.73874  |
| 1046. | RY* | ( 10) | C | 59 | 0.00001 | 2.45796  |
| 1047. | RY* | ( 11) | C | 59 | 0.00001 | 2.51727  |
| 1048. | RY* | ( 12) | C | 59 | 0.00000 | 20.37556 |
| 1049. | RY* | ( 13) | C | 59 | 0.00001 | 2.22918  |
| 1050. | RY* | ( 14) | C | 59 | 0.00001 | 1.93934  |
| 1051. | RY* | ( 1)  | C | 60 | 0.00173 | 0.89556  |
| 1052. | RY* | ( 2)  | C | 60 | 0.00133 | 0.86446  |
| 1053. | RY* | ( 3)  | C | 60 | 0.00047 | 1.12367  |
| 1054. | RY* | ( 4)  | C | 60 | 0.00023 | 1.13161  |
| 1055. | RY* | ( 5)  | C | 60 | 0.00019 | 1.80186  |
| 1056. | RY* | ( 6)  | C | 60 | 0.00011 | 1.65999  |
| 1057. | RY* | ( 7)  | C | 60 | 0.00006 | 2.30291  |
| 1058. | RY* | ( 8)  | C | 60 | 0.00003 | 1.65011  |
| 1059. | RY* | ( 9)  | C | 60 | 0.00004 | 2.63925  |
| 1060. | RY* | ( 10) | C | 60 | 0.00001 | 2.11372  |
| 1061. | RY* | ( 11) | C | 60 | 0.00001 | 2.52982  |
| 1062. | RY* | ( 12) | C | 60 | 0.00001 | 2.09279  |
| 1063. | RY* | ( 13) | C | 60 | 0.00001 | 2.32428  |
| 1064. | RY* | ( 14) | C | 60 | 0.00000 | 20.27242 |
| 1065. | RY* | ( 1)  | C | 61 | 0.00159 | 0.95042  |
| 1066. | RY* | ( 2)  | C | 61 | 0.00108 | 0.92611  |
| 1067. | RY* | ( 3)  | C | 61 | 0.00046 | 0.80289  |
| 1068. | RY* | ( 4)  | C | 61 | 0.00019 | 1.52112  |
| 1069. | RY* | ( 5)  | C | 61 | 0.00014 | 1.58120  |
| 1070. | RY* | ( 6)  | C | 61 | 0.00010 | 1.77457  |
| 1071. | RY* | ( 7)  | C | 61 | 0.00006 | 2.16186  |
| 1072. | RY* | ( 8)  | C | 61 | 0.00004 | 1.47399  |
| 1073. | RY* | ( 9)  | C | 61 | 0.00004 | 2.35566  |
| 1074. | RY* | ( 10) | C | 61 | 0.00001 | 2.25826  |
| 1075. | RY* | ( 11) | C | 61 | 0.00001 | 2.24594  |
| 1076. | RY* | ( 12) | C | 61 | 0.00001 | 2.25334  |
| 1077. | RY* | ( 13) | C | 61 | 0.00000 | 20.52730 |
| 1078. | RY* | ( 14) | C | 61 | 0.00001 | 2.30590  |
| 1079. | RY* | ( 1)  | C | 62 | 0.00178 | 0.81163  |
| 1080. | RY* | ( 2)  | C | 62 | 0.00127 | 0.85863  |
| 1081. | RY* | ( 3)  | C | 62 | 0.00040 | 1.07542  |
| 1082. | RY* | ( 4)  | C | 62 | 0.00023 | 1.26309  |
| 1083. | RY* | ( 5)  | C | 62 | 0.00016 | 1.61807  |
| 1084. | RY* | ( 6)  | C | 62 | 0.00012 | 1.54980  |
| 1085. | RY* | ( 7)  | C | 62 | 0.00007 | 2.17064  |
| 1086. | RY* | ( 8)  | C | 62 | 0.00007 | 2.06883  |
| 1087. | RY* | ( 9)  | C | 62 | 0.00003 | 2.49295  |
| 1088. | RY* | ( 10) | C | 62 | 0.00004 | 2.06901  |
| 1089. | RY* | ( 11) | C | 62 | 0.00000 | 20.24689 |
| 1090. | RY* | ( 12) | C | 62 | 0.00001 | 2.15050  |
| 1091. | RY* | ( 13) | C | 62 | 0.00001 | 2.24099  |
| 1092. | RY* | ( 14) | C | 62 | 0.00001 | 2.27253  |
| 1093. | RY* | ( 1)  | H | 63 | 0.00043 | 1.79385  |
| 1094. | RY* | ( 2)  | H | 63 | 0.00028 | 1.61778  |
| 1095. | RY* | ( 3)  | H | 63 | 0.00011 | 1.97496  |



|       |     |      |   |    |         |         |
|-------|-----|------|---|----|---------|---------|
| 1096. | RY* | ( 4) | H | 63 | 0.00010 | 1.16266 |
| 1097. | RY* | ( 5) | H | 63 | 0.00003 | 2.44092 |
| 1098. | RY* | ( 1) | H | 64 | 0.00043 | 1.76821 |
| 1099. | RY* | ( 2) | H | 64 | 0.00028 | 1.64487 |
| 1100. | RY* | ( 3) | H | 64 | 0.00011 | 1.93275 |
| 1101. | RY* | ( 4) | H | 64 | 0.00010 | 1.10422 |
| 1102. | RY* | ( 5) | H | 64 | 0.00003 | 2.47834 |
| 1103. | RY* | ( 1) | H | 65 | 0.00120 | 0.61556 |
| 1104. | RY* | ( 2) | H | 65 | 0.00029 | 1.81621 |
| 1105. | RY* | ( 3) | H | 65 | 0.00026 | 2.07594 |
| 1106. | RY* | ( 4) | H | 65 | 0.00011 | 2.02815 |
| 1107. | RY* | ( 5) | H | 65 | 0.00004 | 2.72868 |
| 1108. | RY* | ( 1) | H | 66 | 0.00029 | 1.22356 |
| 1109. | RY* | ( 2) | H | 66 | 0.00022 | 1.61908 |
| 1110. | RY* | ( 3) | H | 66 | 0.00018 | 1.12419 |
| 1111. | RY* | ( 4) | H | 66 | 0.00012 | 2.03314 |
| 1112. | RY* | ( 5) | H | 66 | 0.00002 | 2.75975 |
| 1113. | RY* | ( 1) | H | 67 | 0.00103 | 0.62193 |
| 1114. | RY* | ( 2) | H | 67 | 0.00028 | 2.22492 |
| 1115. | RY* | ( 3) | H | 67 | 0.00024 | 1.68072 |
| 1116. | RY* | ( 4) | H | 67 | 0.00013 | 2.02673 |
| 1117. | RY* | ( 5) | H | 67 | 0.00004 | 2.73532 |
| 1118. | RY* | ( 1) | H | 68 | 0.00136 | 0.61408 |
| 1119. | RY* | ( 2) | H | 68 | 0.00033 | 2.05173 |
| 1120. | RY* | ( 3) | H | 68 | 0.00025 | 1.87159 |
| 1121. | RY* | ( 4) | H | 68 | 0.00011 | 2.02656 |
| 1122. | RY* | ( 5) | H | 68 | 0.00004 | 2.71909 |
| 1123. | RY* | ( 1) | H | 69 | 0.00031 | 1.11626 |
| 1124. | RY* | ( 2) | H | 69 | 0.00024 | 1.62513 |
| 1125. | RY* | ( 3) | H | 69 | 0.00018 | 1.21117 |
| 1126. | RY* | ( 4) | H | 69 | 0.00012 | 2.02311 |
| 1127. | RY* | ( 5) | H | 69 | 0.00002 | 2.74760 |
| 1128. | RY* | ( 1) | H | 70 | 0.00114 | 0.60560 |
| 1129. | RY* | ( 2) | H | 70 | 0.00027 | 2.22135 |
| 1130. | RY* | ( 3) | H | 70 | 0.00026 | 1.64416 |
| 1131. | RY* | ( 4) | H | 70 | 0.00011 | 2.01719 |
| 1132. | RY* | ( 5) | H | 70 | 0.00004 | 2.72522 |
| 1133. | RY* | ( 1) | H | 71 | 0.00044 | 1.79584 |
| 1134. | RY* | ( 2) | H | 71 | 0.00033 | 1.65195 |
| 1135. | RY* | ( 3) | H | 71 | 0.00012 | 1.99082 |
| 1136. | RY* | ( 4) | H | 71 | 0.00010 | 1.12205 |
| 1137. | RY* | ( 5) | H | 71 | 0.00003 | 2.49225 |
| 1138. | RY* | ( 1) | H | 72 | 0.00044 | 1.76929 |
| 1139. | RY* | ( 2) | H | 72 | 0.00033 | 1.64027 |
| 1140. | RY* | ( 3) | H | 72 | 0.00011 | 1.98835 |
| 1141. | RY* | ( 4) | H | 72 | 0.00010 | 1.10642 |
| 1142. | RY* | ( 5) | H | 72 | 0.00003 | 2.53827 |
| 1143. | RY* | ( 1) | H | 73 | 0.00131 | 0.61001 |
| 1144. | RY* | ( 2) | H | 73 | 0.00028 | 1.92813 |
| 1145. | RY* | ( 3) | H | 73 | 0.00026 | 1.94217 |
| 1146. | RY* | ( 4) | H | 73 | 0.00011 | 2.02867 |
| 1147. | RY* | ( 5) | H | 73 | 0.00004 | 2.73421 |
| 1148. | RY* | ( 1) | H | 74 | 0.00032 | 1.16703 |
| 1149. | RY* | ( 2) | H | 74 | 0.00023 | 1.62436 |
| 1150. | RY* | ( 3) | H | 74 | 0.00019 | 1.17402 |
| 1151. | RY* | ( 4) | H | 74 | 0.00012 | 2.02821 |
| 1152. | RY* | ( 5) | H | 74 | 0.00002 | 2.75731 |
| 1153. | RY* | ( 1) | H | 75 | 0.00114 | 0.61482 |
| 1154. | RY* | ( 2) | H | 75 | 0.00028 | 2.23038 |
| 1155. | RY* | ( 3) | H | 75 | 0.00024 | 1.66626 |
| 1156. | RY* | ( 4) | H | 75 | 0.00014 | 2.02840 |
| 1157. | RY* | ( 5) | H | 75 | 0.00004 | 2.73195 |
| 1158. | RY* | ( 1) | H | 76 | 0.00129 | 0.63414 |
| 1159. | RY* | ( 2) | H | 76 | 0.00032 | 2.13747 |
| 1160. | RY* | ( 3) | H | 76 | 0.00024 | 1.78842 |
| 1161. | RY* | ( 4) | H | 76 | 0.00013 | 2.04052 |
| 1162. | RY* | ( 5) | H | 76 | 0.00004 | 2.72664 |
| 1163. | RY* | ( 1) | H | 77 | 0.00031 | 1.12293 |
| 1164. | RY* | ( 2) | H | 77 | 0.00022 | 1.61640 |
| 1165. | RY* | ( 3) | H | 77 | 0.00019 | 1.22559 |
| 1166. | RY* | ( 4) | H | 77 | 0.00012 | 2.02405 |

|       |     |      |   |    |         |         |
|-------|-----|------|---|----|---------|---------|
| 1167. | RY* | ( 5) | H | 77 | 0.00002 | 2.75728 |
| 1168. | RY* | ( 1) | H | 78 | 0.00125 | 0.61110 |
| 1169. | RY* | ( 2) | H | 78 | 0.00026 | 2.22938 |
| 1170. | RY* | ( 3) | H | 78 | 0.00026 | 1.64339 |
| 1171. | RY* | ( 4) | H | 78 | 0.00011 | 2.02722 |
| 1172. | RY* | ( 5) | H | 78 | 0.00004 | 2.72698 |
| 1173. | RY* | ( 1) | H | 79 | 0.00168 | 0.86938 |
| 1174. | RY* | ( 2) | H | 79 | 0.00027 | 2.22307 |
| 1175. | RY* | ( 3) | H | 79 | 0.00017 | 1.90409 |
| 1176. | RY* | ( 4) | H | 79 | 0.00013 | 2.22953 |
| 1177. | RY* | ( 5) | H | 79 | 0.00001 | 2.89150 |
| 1178. | RY* | ( 1) | H | 80 | 0.00357 | 0.77119 |
| 1179. | RY* | ( 2) | H | 80 | 0.00027 | 2.43558 |
| 1180. | RY* | ( 3) | H | 80 | 0.00017 | 2.06186 |
| 1181. | RY* | ( 4) | H | 80 | 0.00013 | 1.99285 |
| 1182. | RY* | ( 5) | H | 80 | 0.00002 | 2.83084 |
| 1183. | RY* | ( 1) | H | 81 | 0.00179 | 0.83363 |
| 1184. | RY* | ( 2) | H | 81 | 0.00029 | 2.22266 |
| 1185. | RY* | ( 3) | H | 81 | 0.00019 | 1.94847 |
| 1186. | RY* | ( 4) | H | 81 | 0.00013 | 2.15321 |
| 1187. | RY* | ( 5) | H | 81 | 0.00002 | 2.84379 |
| 1188. | RY* | ( 1) | H | 82 | 0.00302 | 0.74587 |
| 1189. | RY* | ( 2) | H | 82 | 0.00024 | 2.40850 |
| 1190. | RY* | ( 3) | H | 82 | 0.00018 | 2.02148 |
| 1191. | RY* | ( 4) | H | 82 | 0.00013 | 2.03038 |
| 1192. | RY* | ( 5) | H | 82 | 0.00002 | 2.82438 |
| 1193. | RY* | ( 1) | H | 83 | 0.00174 | 0.80812 |
| 1194. | RY* | ( 2) | H | 83 | 0.00026 | 2.20093 |
| 1195. | RY* | ( 3) | H | 83 | 0.00018 | 1.90637 |
| 1196. | RY* | ( 4) | H | 83 | 0.00012 | 2.22428 |
| 1197. | RY* | ( 5) | H | 83 | 0.00002 | 2.86428 |
| 1198. | RY* | ( 1) | H | 84 | 0.00176 | 0.71425 |
| 1199. | RY* | ( 2) | H | 84 | 0.00023 | 2.35259 |
| 1200. | RY* | ( 3) | H | 84 | 0.00017 | 1.98275 |
| 1201. | RY* | ( 4) | H | 84 | 0.00013 | 2.06637 |
| 1202. | RY* | ( 5) | H | 84 | 0.00002 | 2.79829 |
| 1203. | RY* | ( 1) | H | 85 | 0.00183 | 0.77740 |
| 1204. | RY* | ( 2) | H | 85 | 0.00029 | 2.22606 |
| 1205. | RY* | ( 3) | H | 85 | 0.00018 | 1.93892 |
| 1206. | RY* | ( 4) | H | 85 | 0.00012 | 2.12847 |
| 1207. | RY* | ( 5) | H | 85 | 0.00002 | 2.81012 |
| 1208. | RY* | ( 1) | H | 86 | 0.00160 | 0.73705 |
| 1209. | RY* | ( 2) | H | 86 | 0.00025 | 2.16107 |
| 1210. | RY* | ( 3) | H | 86 | 0.00017 | 1.91241 |
| 1211. | RY* | ( 4) | H | 86 | 0.00012 | 2.13962 |
| 1212. | RY* | ( 5) | H | 86 | 0.00002 | 2.82939 |
| 1213. | RY* | ( 1) | H | 87 | 0.00064 | 0.70953 |
| 1214. | RY* | ( 2) | H | 87 | 0.00019 | 1.88972 |
| 1215. | RY* | ( 3) | H | 87 | 0.00012 | 1.78807 |
| 1216. | RY* | ( 4) | H | 87 | 0.00007 | 1.74216 |
| 1217. | RY* | ( 5) | H | 87 | 0.00002 | 2.71698 |
| 1218. | RY* | ( 1) | H | 88 | 0.00071 | 0.89578 |
| 1219. | RY* | ( 2) | H | 88 | 0.00024 | 1.79490 |
| 1220. | RY* | ( 3) | H | 88 | 0.00012 | 1.80289 |
| 1221. | RY* | ( 4) | H | 88 | 0.00007 | 1.71955 |
| 1222. | RY* | ( 5) | H | 88 | 0.00002 | 2.66637 |
| 1223. | RY* | ( 1) | H | 89 | 0.00090 | 1.12285 |
| 1224. | RY* | ( 2) | H | 89 | 0.00019 | 1.85056 |
| 1225. | RY* | ( 3) | H | 89 | 0.00012 | 1.86311 |
| 1226. | RY* | ( 4) | H | 89 | 0.00010 | 1.90580 |
| 1227. | RY* | ( 5) | H | 89 | 0.00002 | 2.66958 |
| 1228. | RY* | ( 1) | H | 90 | 0.00064 | 0.73010 |
| 1229. | RY* | ( 2) | H | 90 | 0.00016 | 1.82400 |
| 1230. | RY* | ( 3) | H | 90 | 0.00013 | 1.85029 |
| 1231. | RY* | ( 4) | H | 90 | 0.00006 | 1.68790 |
| 1232. | RY* | ( 5) | H | 90 | 0.00002 | 2.67493 |
| 1233. | RY* | ( 1) | H | 91 | 0.00062 | 1.02755 |
| 1234. | RY* | ( 2) | H | 91 | 0.00015 | 1.81332 |
| 1235. | RY* | ( 3) | H | 91 | 0.00015 | 1.79976 |
| 1236. | RY* | ( 4) | H | 91 | 0.00004 | 1.63403 |
| 1237. | RY* | ( 5) | H | 91 | 0.00002 | 2.69566 |

|       |     |      |   |     |         |         |
|-------|-----|------|---|-----|---------|---------|
| 1238. | RY* | ( 1) | H | 92  | 0.00089 | 0.80131 |
| 1239. | RY* | ( 2) | H | 92  | 0.00014 | 1.82345 |
| 1240. | RY* | ( 3) | H | 92  | 0.00013 | 1.76209 |
| 1241. | RY* | ( 4) | H | 92  | 0.00006 | 1.69734 |
| 1242. | RY* | ( 5) | H | 92  | 0.00002 | 2.72109 |
| 1243. | RY* | ( 1) | H | 93  | 0.00063 | 0.69790 |
| 1244. | RY* | ( 2) | H | 93  | 0.00014 | 1.79790 |
| 1245. | RY* | ( 3) | H | 93  | 0.00014 | 1.81959 |
| 1246. | RY* | ( 4) | H | 93  | 0.00006 | 1.68060 |
| 1247. | RY* | ( 5) | H | 93  | 0.00002 | 2.70103 |
| 1248. | RY* | ( 1) | H | 94  | 0.00076 | 0.91344 |
| 1249. | RY* | ( 2) | H | 94  | 0.00018 | 1.78692 |
| 1250. | RY* | ( 3) | H | 94  | 0.00015 | 1.79901 |
| 1251. | RY* | ( 4) | H | 94  | 0.00006 | 1.60698 |
| 1252. | RY* | ( 5) | H | 94  | 0.00002 | 2.66551 |
| 1253. | RY* | ( 1) | H | 95  | 0.00054 | 0.76418 |
| 1254. | RY* | ( 2) | H | 95  | 0.00014 | 1.83136 |
| 1255. | RY* | ( 3) | H | 95  | 0.00013 | 1.89822 |
| 1256. | RY* | ( 4) | H | 95  | 0.00007 | 1.59324 |
| 1257. | RY* | ( 5) | H | 95  | 0.00001 | 2.70840 |
| 1258. | RY* | ( 1) | H | 96  | 0.00077 | 0.62470 |
| 1259. | RY* | ( 2) | H | 96  | 0.00018 | 1.83649 |
| 1260. | RY* | ( 3) | H | 96  | 0.00013 | 1.80780 |
| 1261. | RY* | ( 4) | H | 96  | 0.00010 | 1.86326 |
| 1262. | RY* | ( 5) | H | 96  | 0.00002 | 2.73045 |
| 1263. | RY* | ( 1) | H | 97  | 0.00090 | 0.89192 |
| 1264. | RY* | ( 2) | H | 97  | 0.00025 | 2.41614 |
| 1265. | RY* | ( 3) | H | 97  | 0.00012 | 1.88045 |
| 1266. | RY* | ( 4) | H | 97  | 0.00009 | 1.86340 |
| 1267. | RY* | ( 5) | H | 97  | 0.00002 | 2.73974 |
| 1268. | RY* | ( 1) | H | 98  | 0.00071 | 0.98641 |
| 1269. | RY* | ( 2) | H | 98  | 0.00020 | 1.70195 |
| 1270. | RY* | ( 3) | H | 98  | 0.00014 | 1.89711 |
| 1271. | RY* | ( 4) | H | 98  | 0.00009 | 1.63643 |
| 1272. | RY* | ( 5) | H | 98  | 0.00002 | 2.67976 |
| 1273. | RY* | ( 1) | H | 99  | 0.00062 | 0.70536 |
| 1274. | RY* | ( 2) | H | 99  | 0.00014 | 1.80266 |
| 1275. | RY* | ( 3) | H | 99  | 0.00014 | 1.82016 |
| 1276. | RY* | ( 4) | H | 99  | 0.00006 | 1.68172 |
| 1277. | RY* | ( 5) | H | 99  | 0.00002 | 2.69190 |
| 1278. | RY* | ( 1) | H | 100 | 0.00080 | 0.86635 |
| 1279. | RY* | ( 2) | H | 100 | 0.00016 | 1.79842 |
| 1280. | RY* | ( 3) | H | 100 | 0.00015 | 1.81577 |
| 1281. | RY* | ( 4) | H | 100 | 0.00006 | 1.62492 |
| 1282. | RY* | ( 5) | H | 100 | 0.00002 | 2.66602 |
| 1283. | RY* | ( 1) | H | 101 | 0.00056 | 0.75690 |
| 1284. | RY* | ( 2) | H | 101 | 0.00013 | 1.92768 |
| 1285. | RY* | ( 3) | H | 101 | 0.00014 | 1.79989 |
| 1286. | RY* | ( 4) | H | 101 | 0.00007 | 1.61722 |
| 1287. | RY* | ( 5) | H | 101 | 0.00001 | 2.70993 |
| 1288. | RY* | ( 1) | H | 102 | 0.00060 | 0.73052 |
| 1289. | RY* | ( 2) | H | 102 | 0.00018 | 1.79870 |
| 1290. | RY* | ( 3) | H | 102 | 0.00013 | 1.74538 |
| 1291. | RY* | ( 4) | H | 102 | 0.00010 | 1.89615 |
| 1292. | RY* | ( 5) | H | 102 | 0.00002 | 2.72772 |
| 1293. | RY* | ( 1) | H | 103 | 0.00071 | 0.97446 |
| 1294. | RY* | ( 2) | H | 103 | 0.00022 | 2.50420 |
| 1295. | RY* | ( 3) | H | 103 | 0.00012 | 1.85293 |
| 1296. | RY* | ( 4) | H | 103 | 0.00008 | 1.90415 |
| 1297. | RY* | ( 5) | H | 103 | 0.00003 | 2.74695 |
| 1298. | RY* | ( 1) | H | 104 | 0.00076 | 0.92555 |
| 1299. | RY* | ( 2) | H | 104 | 0.00022 | 1.76298 |
| 1300. | RY* | ( 3) | H | 104 | 0.00014 | 1.91786 |
| 1301. | RY* | ( 4) | H | 104 | 0.00011 | 1.70568 |
| 1302. | RY* | ( 5) | H | 104 | 0.00002 | 2.69090 |
| 1303. | RY* | ( 1) | H | 105 | 0.00059 | 0.70072 |
| 1304. | RY* | ( 2) | H | 105 | 0.00014 | 1.77845 |
| 1305. | RY* | ( 3) | H | 105 | 0.00014 | 1.81145 |
| 1306. | RY* | ( 4) | H | 105 | 0.00006 | 1.67339 |
| 1307. | RY* | ( 5) | H | 105 | 0.00003 | 2.69450 |
| 1308. | RY* | ( 1) | H | 106 | 0.00053 | 0.71215 |

|       |      |    |   |     |         |         |
|-------|------|----|---|-----|---------|---------|
| 1309. | RY*( | 2) | H | 106 | 0.00014 | 1.82376 |
| 1310. | RY*( | 3) | H | 106 | 0.00013 | 1.86905 |
| 1311. | RY*( | 4) | H | 106 | 0.00007 | 1.62568 |
| 1312. | RY*( | 5) | H | 106 | 0.00002 | 2.69300 |
| 1313. | RY*( | 1) | H | 107 | 0.00074 | 0.92496 |
| 1314. | RY*( | 2) | H | 107 | 0.00020 | 1.78659 |
| 1315. | RY*( | 3) | H | 107 | 0.00014 | 1.79177 |
| 1316. | RY*( | 4) | H | 107 | 0.00006 | 1.55249 |
| 1317. | RY*( | 5) | H | 107 | 0.00002 | 2.67933 |
| 1318. | RY*( | 1) | H | 108 | 0.00076 | 0.64259 |
| 1319. | RY*( | 2) | H | 108 | 0.00018 | 1.84225 |
| 1320. | RY*( | 3) | H | 108 | 0.00013 | 1.80704 |
| 1321. | RY*( | 4) | H | 108 | 0.00011 | 1.86115 |
| 1322. | RY*( | 5) | H | 108 | 0.00002 | 2.71187 |
| 1323. | RY*( | 1) | H | 109 | 0.00088 | 0.84659 |
| 1324. | RY*( | 2) | H | 109 | 0.00020 | 1.75570 |
| 1325. | RY*( | 3) | H | 109 | 0.00014 | 1.94752 |
| 1326. | RY*( | 4) | H | 109 | 0.00009 | 1.75711 |
| 1327. | RY*( | 5) | H | 109 | 0.00002 | 2.68362 |
| 1328. | RY*( | 1) | H | 110 | 0.00066 | 0.90989 |
| 1329. | RY*( | 2) | H | 110 | 0.00024 | 2.43109 |
| 1330. | RY*( | 3) | H | 110 | 0.00014 | 1.91267 |
| 1331. | RY*( | 4) | H | 110 | 0.00007 | 1.89506 |
| 1332. | RY*( | 5) | H | 110 | 0.00002 | 2.73635 |
| 1333. | RY*( | 1) | H | 111 | 0.00075 | 0.66146 |
| 1334. | RY*( | 2) | H | 111 | 0.00017 | 1.84752 |
| 1335. | RY*( | 3) | H | 111 | 0.00014 | 1.79931 |
| 1336. | RY*( | 4) | H | 111 | 0.00009 | 1.79512 |
| 1337. | RY*( | 5) | H | 111 | 0.00002 | 2.70555 |
| 1338. | RY*( | 1) | H | 112 | 0.00085 | 0.84559 |
| 1339. | RY*( | 2) | H | 112 | 0.00021 | 1.82039 |
| 1340. | RY*( | 3) | H | 112 | 0.00015 | 1.85275 |
| 1341. | RY*( | 4) | H | 112 | 0.00008 | 1.69433 |
| 1342. | RY*( | 5) | H | 112 | 0.00002 | 2.68168 |
| 1343. | RY*( | 1) | H | 113 | 0.00047 | 1.25220 |
| 1344. | RY*( | 2) | H | 113 | 0.00015 | 1.85904 |
| 1345. | RY*( | 3) | H | 113 | 0.00011 | 2.08192 |
| 1346. | RY*( | 4) | H | 113 | 0.00005 | 1.84175 |
| 1347. | RY*( | 5) | H | 113 | 0.00002 | 2.75513 |
| 1348. | RY*( | 1) | H | 114 | 0.00064 | 0.69363 |
| 1349. | RY*( | 2) | H | 114 | 0.00014 | 1.80121 |
| 1350. | RY*( | 3) | H | 114 | 0.00014 | 1.81947 |
| 1351. | RY*( | 4) | H | 114 | 0.00006 | 1.68962 |
| 1352. | RY*( | 5) | H | 114 | 0.00002 | 2.69883 |
| 1353. | RY*( | 1) | H | 115 | 0.00055 | 0.77470 |
| 1354. | RY*( | 2) | H | 115 | 0.00013 | 1.92434 |
| 1355. | RY*( | 3) | H | 115 | 0.00014 | 1.80773 |
| 1356. | RY*( | 4) | H | 115 | 0.00007 | 1.58426 |
| 1357. | RY*( | 5) | H | 115 | 0.00002 | 2.70666 |
| 1358. | RY*( | 1) | H | 116 | 0.00078 | 0.89106 |
| 1359. | RY*( | 2) | H | 116 | 0.00018 | 1.79692 |
| 1360. | RY*( | 3) | H | 116 | 0.00015 | 1.80172 |
| 1361. | RY*( | 4) | H | 116 | 0.00006 | 1.60334 |
| 1362. | RY*( | 5) | H | 116 | 0.00002 | 2.67269 |
| 1363. | RY*( | 1) | H | 117 | 0.00063 | 0.74818 |
| 1364. | RY*( | 2) | H | 117 | 0.00016 | 1.82064 |
| 1365. | RY*( | 3) | H | 117 | 0.00013 | 1.86209 |
| 1366. | RY*( | 4) | H | 117 | 0.00006 | 1.69002 |
| 1367. | RY*( | 5) | H | 117 | 0.00002 | 2.69143 |
| 1368. | RY*( | 1) | H | 118 | 0.00088 | 0.79119 |
| 1369. | RY*( | 2) | H | 118 | 0.00014 | 1.83336 |
| 1370. | RY*( | 3) | H | 118 | 0.00013 | 1.77163 |
| 1371. | RY*( | 4) | H | 118 | 0.00006 | 1.71378 |
| 1372. | RY*( | 5) | H | 118 | 0.00002 | 2.71969 |
| 1373. | RY*( | 1) | H | 119 | 0.00062 | 0.97863 |
| 1374. | RY*( | 2) | H | 119 | 0.00015 | 1.82347 |
| 1375. | RY*( | 3) | H | 119 | 0.00015 | 1.82648 |
| 1376. | RY*( | 4) | H | 119 | 0.00005 | 1.67412 |
| 1377. | RY*( | 5) | H | 119 | 0.00002 | 2.71322 |
| 1378. | RY*( | 1) | H | 120 | 0.00056 | 0.80439 |
| 1379. | RY*( | 2) | H | 120 | 0.00017 | 1.83674 |

|       |     |      |       |         |         |
|-------|-----|------|-------|---------|---------|
| 1380. | RY* | ( 3) | H 120 | 0.00013 | 1.76527 |
| 1381. | RY* | ( 4) | H 120 | 0.00008 | 1.78266 |
| 1382. | RY* | ( 5) | H 120 | 0.00002 | 2.71997 |
| 1383. | RY* | ( 1) | H 121 | 0.00083 | 0.87271 |
| 1384. | RY* | ( 2) | H 121 | 0.00020 | 2.40013 |
| 1385. | RY* | ( 3) | H 121 | 0.00013 | 1.89478 |
| 1386. | RY* | ( 4) | H 121 | 0.00006 | 1.84799 |
| 1387. | RY* | ( 5) | H 121 | 0.00002 | 2.75149 |
| 1388. | RY* | ( 1) | H 122 | 0.00073 | 0.83245 |
| 1389. | RY* | ( 2) | H 122 | 0.00025 | 1.75042 |
| 1390. | RY* | ( 3) | H 122 | 0.00013 | 1.90770 |
| 1391. | RY* | ( 4) | H 122 | 0.00009 | 1.70012 |
| 1392. | RY* | ( 5) | H 122 | 0.00002 | 2.72641 |
| 1393. | RY* | ( 1) | H 123 | 0.00070 | 0.74128 |
| 1394. | RY* | ( 2) | H 123 | 0.00020 | 1.88868 |
| 1395. | RY* | ( 3) | H 123 | 0.00012 | 1.81763 |
| 1396. | RY* | ( 4) | H 123 | 0.00007 | 1.75120 |
| 1397. | RY* | ( 5) | H 123 | 0.00003 | 2.72200 |
| 1398. | RY* | ( 1) | H 124 | 0.00073 | 0.86185 |
| 1399. | RY* | ( 2) | H 124 | 0.00024 | 1.78412 |
| 1400. | RY* | ( 3) | H 124 | 0.00012 | 1.83974 |
| 1401. | RY* | ( 4) | H 124 | 0.00008 | 1.74178 |
| 1402. | RY* | ( 5) | H 124 | 0.00002 | 2.65696 |
| 1403. | RY* | ( 1) | H 125 | 0.00056 | 0.84236 |
| 1404. | RY* | ( 2) | H 125 | 0.00017 | 1.94721 |
| 1405. | RY* | ( 3) | H 125 | 0.00014 | 1.97302 |
| 1406. | RY* | ( 4) | H 125 | 0.00007 | 1.80244 |
| 1407. | RY* | ( 5) | H 125 | 0.00002 | 2.73228 |
| 1408. | RY* | ( 1) | H 126 | 0.00062 | 0.75508 |
| 1409. | RY* | ( 2) | H 126 | 0.00016 | 1.82932 |
| 1410. | RY* | ( 3) | H 126 | 0.00012 | 1.86322 |
| 1411. | RY* | ( 4) | H 126 | 0.00006 | 1.68041 |
| 1412. | RY* | ( 5) | H 126 | 0.00002 | 2.69509 |
| 1413. | RY* | ( 1) | H 127 | 0.00062 | 1.08144 |
| 1414. | RY* | ( 2) | H 127 | 0.00017 | 1.78061 |
| 1415. | RY* | ( 3) | H 127 | 0.00015 | 1.81164 |
| 1416. | RY* | ( 4) | H 127 | 0.00005 | 1.66893 |
| 1417. | RY* | ( 5) | H 127 | 0.00002 | 2.71974 |
| 1418. | RY* | ( 1) | H 128 | 0.00088 | 0.78126 |
| 1419. | RY* | ( 2) | H 128 | 0.00015 | 1.83365 |
| 1420. | RY* | ( 3) | H 128 | 0.00013 | 1.79183 |
| 1421. | RY* | ( 4) | H 128 | 0.00006 | 1.69953 |
| 1422. | RY* | ( 5) | H 128 | 0.00002 | 2.72371 |
| 1423. | RY* | ( 1) | H 129 | 0.00064 | 0.69535 |
| 1424. | RY* | ( 2) | H 129 | 0.00014 | 1.81770 |
| 1425. | RY* | ( 3) | H 129 | 0.00015 | 1.82297 |
| 1426. | RY* | ( 4) | H 129 | 0.00006 | 1.67837 |
| 1427. | RY* | ( 5) | H 129 | 0.00002 | 2.70271 |
| 1428. | RY* | ( 1) | H 130 | 0.00079 | 0.87993 |
| 1429. | RY* | ( 2) | H 130 | 0.00017 | 1.78541 |
| 1430. | RY* | ( 3) | H 130 | 0.00015 | 1.80595 |
| 1431. | RY* | ( 4) | H 130 | 0.00006 | 1.62807 |
| 1432. | RY* | ( 5) | H 130 | 0.00002 | 2.67961 |
| 1433. | RY* | ( 1) | H 131 | 0.00059 | 0.79981 |
| 1434. | RY* | ( 2) | H 131 | 0.00013 | 1.92011 |
| 1435. | RY* | ( 3) | H 131 | 0.00014 | 1.80174 |
| 1436. | RY* | ( 4) | H 131 | 0.00007 | 1.59487 |
| 1437. | RY* | ( 5) | H 131 | 0.00002 | 2.71060 |
| 1438. | RY* | ( 1) | H 132 | 0.00076 | 0.60165 |
| 1439. | RY* | ( 2) | H 132 | 0.00018 | 1.84445 |
| 1440. | RY* | ( 3) | H 132 | 0.00014 | 1.82504 |
| 1441. | RY* | ( 4) | H 132 | 0.00009 | 1.83983 |
| 1442. | RY* | ( 5) | H 132 | 0.00002 | 2.72752 |
| 1443. | RY* | ( 1) | H 133 | 0.00092 | 0.87791 |
| 1444. | RY* | ( 2) | H 133 | 0.00023 | 2.37742 |
| 1445. | RY* | ( 3) | H 133 | 0.00013 | 1.85754 |
| 1446. | RY* | ( 4) | H 133 | 0.00008 | 1.82668 |
| 1447. | RY* | ( 5) | H 133 | 0.00002 | 2.71545 |
| 1448. | RY* | ( 1) | H 134 | 0.00075 | 0.92314 |
| 1449. | RY* | ( 2) | H 134 | 0.00021 | 1.71696 |
| 1450. | RY* | ( 3) | H 134 | 0.00014 | 1.87739 |

|             |    |   |        |    |         |                                                                                                                                                                                                                                                                                                                                                                                                                                                                                                                                                                                                                                                                   |
|-------------|----|---|--------|----|---------|-------------------------------------------------------------------------------------------------------------------------------------------------------------------------------------------------------------------------------------------------------------------------------------------------------------------------------------------------------------------------------------------------------------------------------------------------------------------------------------------------------------------------------------------------------------------------------------------------------------------------------------------------------------------|
| 1451. RY* ( | 4) | H | 134    |    | 0.00009 | 1.66305                                                                                                                                                                                                                                                                                                                                                                                                                                                                                                                                                                                                                                                           |
| 1452. RY* ( | 5) | H | 134    |    | 0.00002 | 2.68313                                                                                                                                                                                                                                                                                                                                                                                                                                                                                                                                                                                                                                                           |
| 1453. BD* ( | 1) | C | 1 - O  | 2  | 0.04220 | 0.51533                                                                                                                                                                                                                                                                                                                                                                                                                                                                                                                                                                                                                                                           |
| 1454. BD* ( | 2) | C | 1 - O  | 2  | 0.48062 | 0.04161 224 (v), 223 (v), 241 (g), 227 (g)<br>231 (g), 247 (g)                                                                                                                                                                                                                                                                                                                                                                                                                                                                                                                                                                                                    |
| 1455. BD* ( | 1) | C | 1 - B  | 14 | 0.11075 | 0.33338 1604 (r), 1484 (g), 1594 (r)<br>1513 (r), 1601 (r), 1473 (v)<br>1475 (v), 411 (g), 1597 (r)<br>1589 (r), 1453 (g)                                                                                                                                                                                                                                                                                                                                                                                                                                                                                                                                         |
| 1456. BD* ( | 1) | C | 1 - B  | 15 | 0.06815 | 0.45203                                                                                                                                                                                                                                                                                                                                                                                                                                                                                                                                                                                                                                                           |
| 1457. BD* ( | 1) | C | 3 - C  | 4  | 0.03587 | 0.45910                                                                                                                                                                                                                                                                                                                                                                                                                                                                                                                                                                                                                                                           |
| 1458. BD* ( | 1) | C | 3 - C  | 8  | 0.02327 | 0.47800                                                                                                                                                                                                                                                                                                                                                                                                                                                                                                                                                                                                                                                           |
| 1459. BD* ( | 2) | C | 3 - C  | 8  | 0.33135 | 0.01402 1462 (v), 1467 (v), 1581 (v)<br>326 (g), 1582 (v)                                                                                                                                                                                                                                                                                                                                                                                                                                                                                                                                                                                                         |
| 1460. BD* ( | 1) | C | 3 - C  | 53 | 0.03220 | 0.33721                                                                                                                                                                                                                                                                                                                                                                                                                                                                                                                                                                                                                                                           |
| 1461. BD* ( | 1) | C | 4 - C  | 5  | 0.03690 | 0.45890                                                                                                                                                                                                                                                                                                                                                                                                                                                                                                                                                                                                                                                           |
| 1462. BD* ( | 2) | C | 4 - C  | 5  | 0.37359 | 0.00915 1467 (v), 1459 (v), 223 (r)<br>1472 (v), 1474 (v), 1576 (v)<br>1575 (v), 298 (v), 269 (g)                                                                                                                                                                                                                                                                                                                                                                                                                                                                                                                                                                 |
| 1463. BD* ( | 1) | C | 4 - N  | 9  | 0.03921 | 0.30940                                                                                                                                                                                                                                                                                                                                                                                                                                                                                                                                                                                                                                                           |
| 1464. BD* ( | 1) | C | 5 - C  | 6  | 0.02290 | 0.47118                                                                                                                                                                                                                                                                                                                                                                                                                                                                                                                                                                                                                                                           |
| 1465. BD* ( | 1) | C | 5 - C  | 51 | 0.03210 | 0.32453                                                                                                                                                                                                                                                                                                                                                                                                                                                                                                                                                                                                                                                           |
| 1466. BD* ( | 1) | C | 6 - C  | 7  | 0.01486 | 0.48888                                                                                                                                                                                                                                                                                                                                                                                                                                                                                                                                                                                                                                                           |
| 1467. BD* ( | 2) | C | 6 - C  | 7  | 0.33555 | 0.00445 1462 (v), 1459 (v), 312 (g)<br>298 (g)                                                                                                                                                                                                                                                                                                                                                                                                                                                                                                                                                                                                                    |
| 1468. BD* ( | 1) | C | 6 - H  | 78 | 0.01759 | 0.34499                                                                                                                                                                                                                                                                                                                                                                                                                                                                                                                                                                                                                                                           |
| 1469. BD* ( | 1) | C | 7 - C  | 8  | 0.01498 | 0.48832                                                                                                                                                                                                                                                                                                                                                                                                                                                                                                                                                                                                                                                           |
| 1470. BD* ( | 1) | C | 7 - H  | 77 | 0.01576 | 0.34484                                                                                                                                                                                                                                                                                                                                                                                                                                                                                                                                                                                                                                                           |
| 1471. BD* ( | 1) | C | 8 - H  | 76 | 0.01781 | 0.35502                                                                                                                                                                                                                                                                                                                                                                                                                                                                                                                                                                                                                                                           |
| 1472. BD* ( | 1) | N | 9 - C  | 10 | 0.04581 | 0.34876                                                                                                                                                                                                                                                                                                                                                                                                                                                                                                                                                                                                                                                           |
| 1473. BD* ( | 2) | N | 9 - C  | 10 | 0.72110 | -0.04497 1481 (v), 1455 (v), 353 (g)<br>1461 (v), 1484 (v), 1457 (v)<br>355 (g)                                                                                                                                                                                                                                                                                                                                                                                                                                                                                                                                                                                   |
| 1474. BD* ( | 1) | N | 9 - C  | 13 | 0.03014 | 0.34314                                                                                                                                                                                                                                                                                                                                                                                                                                                                                                                                                                                                                                                           |
| 1475. BD* ( | 1) | C | 10 - N | 11 | 0.04659 | 0.34712                                                                                                                                                                                                                                                                                                                                                                                                                                                                                                                                                                                                                                                           |
| 1476. BD* ( | 1) | C | 10 - B | 14 | 0.02957 | 0.44002                                                                                                                                                                                                                                                                                                                                                                                                                                                                                                                                                                                                                                                           |
| 1477. BD* ( | 1) | N | 11 - C | 12 | 0.02954 | 0.34108                                                                                                                                                                                                                                                                                                                                                                                                                                                                                                                                                                                                                                                           |
| 1478. BD* ( | 1) | N | 11 - C | 41 | 0.03975 | 0.30683                                                                                                                                                                                                                                                                                                                                                                                                                                                                                                                                                                                                                                                           |
| 1479. BD* ( | 2) | N | 11 - C | 41 | 0.45441 | 0.99640 858 (v), 802 (v), 1550 (g)<br>1549 (g), 794 (g), 788 (g), 800 (v)<br>789 (g), 787 (g), 792 (g), 856 (v)<br>884 (r), 996 (r), 1551 (g), 842 (r)<br>870 (r), 793 (g), 809 (v), 869 (r)<br>790 (g), 844 (r), 816 (r), 855 (v)<br>805 (v), 865 (v), 366 (g), 867 (v)<br>828 (r), 338 (r), 1560 (v), 897 (r)<br>1024 (r), 857 (v), 913 (r), 811 (v)<br>866 (v), 1552 (v), 372 (g)<br>1413 (r), 861 (v), 871 (r), 898 (r)<br>912 (r), 907 (r), 832 (r), 813 (r)<br>903 (r), 257 (r), 411 (r), 848 (r)<br>835 (r), 819 (r), 1030 (r), 853 (r)<br>824 (r), 860 (v), 226 (r), 902 (r)<br>409 (r), 799 (v), 850 (r), 801 (v)<br>864 (v), 1293 (r), 808 (v), 890 (r) |
| 1480. BD* ( | 1) | C | 12 - C | 13 | 0.00980 | 0.50420                                                                                                                                                                                                                                                                                                                                                                                                                                                                                                                                                                                                                                                           |
| 1481. BD* ( | 2) | C | 12 - C | 13 | 0.28111 | -0.01244 1473 (v), 384 (g), 398 (g)                                                                                                                                                                                                                                                                                                                                                                                                                                                                                                                                                                                                                               |
| 1482. BD* ( | 1) | C | 12 - H | 71 | 0.01213 | 0.33596                                                                                                                                                                                                                                                                                                                                                                                                                                                                                                                                                                                                                                                           |
| 1483. BD* ( | 1) | C | 13 - H | 72 | 0.01229 | 0.33598                                                                                                                                                                                                                                                                                                                                                                                                                                                                                                                                                                                                                                                           |
| 1484. BD* ( | 1) | B | 14 - B | 15 | 0.04014 | 0.48411                                                                                                                                                                                                                                                                                                                                                                                                                                                                                                                                                                                                                                                           |
| 1485. BD* ( | 1) | B | 15 - C | 16 | 0.05483 | 0.40975                                                                                                                                                                                                                                                                                                                                                                                                                                                                                                                                                                                                                                                           |
| 1486. BD* ( | 1) | C | 16 - N | 17 | 0.04814 | 0.35327                                                                                                                                                                                                                                                                                                                                                                                                                                                                                                                                                                                                                                                           |
| 1487. BD* ( | 2) | C | 16 - N | 17 | 0.60501 | -0.05833 224 (v), 1492 (v), 437 (g)<br>1498 (v), 438 (g), 1497 (v)<br>223 (r)                                                                                                                                                                                                                                                                                                                                                                                                                                                                                                                                                                                     |
| 1488. BD* ( | 1) | C | 16 - N | 20 | 0.05247 | 0.35270                                                                                                                                                                                                                                                                                                                                                                                                                                                                                                                                                                                                                                                           |
| 1489. BD* ( | 1) | N | 17 - C | 18 | 0.03043 | 0.33474                                                                                                                                                                                                                                                                                                                                                                                                                                                                                                                                                                                                                                                           |
| 1490. BD* ( | 1) | N | 17 - C | 21 | 0.04192 | 0.28877                                                                                                                                                                                                                                                                                                                                                                                                                                                                                                                                                                                                                                                           |
| 1491. BD* ( | 1) | C | 18 - C | 19 | 0.00978 | 0.47647                                                                                                                                                                                                                                                                                                                                                                                                                                                                                                                                                                                                                                                           |
| 1492. BD* ( | 2) | C | 18 - C | 19 | 0.28227 | -0.03212 1487 (v), 468 (g), 482 (g)                                                                                                                                                                                                                                                                                                                                                                                                                                                                                                                                                                                                                               |
| 1493. BD* ( | 1) | C | 18 - H | 63 | 0.01214 | 0.31976                                                                                                                                                                                                                                                                                                                                                                                                                                                                                                                                                                                                                                                           |

|       |     |      |   |    |   |   |     |         |                                                                                                                                                     |
|-------|-----|------|---|----|---|---|-----|---------|-----------------------------------------------------------------------------------------------------------------------------------------------------|
| 1494. | BD* | ( 1) | C | 19 | - | N | 20  | 0.03069 | 0.32900                                                                                                                                             |
| 1495. | BD* | ( 1) | C | 19 | - | H | 64  | 0.01258 | 0.31713                                                                                                                                             |
| 1496. | BD* | ( 1) | N | 20 | - | C | 31  | 0.04104 | 0.28946                                                                                                                                             |
| 1497. | BD* | ( 1) | C | 21 | - | C | 22  | 0.03442 | 0.45657                                                                                                                                             |
| 1498. | BD* | ( 1) | C | 21 | - | C | 26  | 0.03531 | 0.45647                                                                                                                                             |
| 1499. | BD* | ( 2) | C | 21 | - | C | 26  | 0.38598 | 0.00727 1506 (v) , 1501 (v) , 1486 (v)<br>1489 (v) , 1518 (v) , 1517 (v)<br>564 (v) , 507 (g)                                                       |
| 1500. | BD* | ( 1) | C | 22 | - | C | 23  | 0.02275 | 0.47953                                                                                                                                             |
| 1501. | BD* | ( 2) | C | 22 | - | C | 23  | 0.32447 | 0.01569 1499 (v) , 1506 (v) , 1511 (v)<br>536 (g) , 1512 (v)                                                                                        |
| 1502. | BD* | ( 1) | C | 22 | - | C | 27  | 0.03210 | 0.33217                                                                                                                                             |
| 1503. | BD* | ( 1) | C | 23 | - | C | 24  | 0.01470 | 0.49071                                                                                                                                             |
| 1504. | BD* | ( 1) | C | 23 | - | H | 67  | 0.01740 | 0.35479                                                                                                                                             |
| 1505. | BD* | ( 1) | C | 24 | - | C | 25  | 0.01474 | 0.48984                                                                                                                                             |
| 1506. | BD* | ( 2) | C | 24 | - | C | 25  | 0.33515 | 0.00573 1499 (v) , 1501 (v) , 550 (g)<br>564 (g)                                                                                                    |
| 1507. | BD* | ( 1) | C | 24 | - | H | 66  | 0.01546 | 0.34666                                                                                                                                             |
| 1508. | BD* | ( 1) | C | 25 | - | C | 26  | 0.02276 | 0.47081                                                                                                                                             |
| 1509. | BD* | ( 1) | C | 25 | - | H | 65  | 0.01723 | 0.34672                                                                                                                                             |
| 1510. | BD* | ( 1) | C | 26 | - | C | 29  | 0.03221 | 0.32251                                                                                                                                             |
| 1511. | BD* | ( 1) | C | 27 | - | C | 28  | 0.01812 | 0.28612                                                                                                                                             |
| 1512. | BD* | ( 1) | C | 27 | - | C | 62  | 0.01403 | 0.30271                                                                                                                                             |
| 1513. | BD* | ( 1) | C | 27 | - | H | 84  | 0.02449 | 0.32569                                                                                                                                             |
| 1514. | BD* | ( 1) | C | 28 | - | H | 90  | 0.00804 | 0.32412                                                                                                                                             |
| 1515. | BD* | ( 1) | C | 28 | - | H | 91  | 0.00798 | 0.32860                                                                                                                                             |
| 1516. | BD* | ( 1) | C | 28 | - | H | 92  | 0.01047 | 0.32142                                                                                                                                             |
| 1517. | BD* | ( 1) | C | 29 | - | C | 30  | 0.01761 | 0.28142                                                                                                                                             |
| 1518. | BD* | ( 1) | C | 29 | - | C | 61  | 0.01761 | 0.28775                                                                                                                                             |
| 1519. | BD* | ( 1) | C | 29 | - | H | 83  | 0.02465 | 0.31304                                                                                                                                             |
| 1520. | BD* | ( 1) | C | 30 | - | H | 93  | 0.00762 | 0.31884                                                                                                                                             |
| 1521. | BD* | ( 1) | C | 30 | - | H | 94  | 0.01056 | 0.31590                                                                                                                                             |
| 1522. | BD* | ( 1) | C | 30 | - | H | 95  | 0.00687 | 0.32035                                                                                                                                             |
| 1523. | BD* | ( 1) | C | 31 | - | C | 32  | 0.03513 | 0.44686                                                                                                                                             |
| 1524. | BD* | ( 1) | C | 31 | - | C | 36  | 0.03523 | 0.45149                                                                                                                                             |
| 1525. | BD* | ( 2) | C | 31 | - | C | 36  | 0.37263 | 0.00103 1527 (v) , 1532 (v) , 1543 (v)<br>1494 (v) , 1488 (v) , 1544 (v)<br>647 (g) , 704 (v)                                                       |
| 1526. | BD* | ( 1) | C | 32 | - | C | 33  | 0.02267 | 0.46340                                                                                                                                             |
| 1527. | BD* | ( 2) | C | 32 | - | C | 33  | 0.34032 | 0.00070 1525 (v) , 1532 (v) , 1538 (v)<br>1537 (v) , 676 (g)                                                                                        |
| 1528. | BD* | ( 1) | C | 32 | - | C | 37  | 0.03229 | 0.31681                                                                                                                                             |
| 1529. | BD* | ( 1) | C | 33 | - | C | 34  | 0.01475 | 0.47915                                                                                                                                             |
| 1530. | BD* | ( 1) | C | 33 | - | H | 70  | 0.01721 | 0.33927                                                                                                                                             |
| 1531. | BD* | ( 1) | C | 34 | - | C | 35  | 0.01478 | 0.47953                                                                                                                                             |
| 1532. | BD* | ( 2) | C | 34 | - | C | 35  | 0.33303 | -0.00352 1527 (v) , 1525 (v) , 690 (g)<br>704 (g)                                                                                                   |
| 1533. | BD* | ( 1) | C | 34 | - | H | 69  | 0.01550 | 0.33870                                                                                                                                             |
| 1534. | BD* | ( 1) | C | 35 | - | C | 36  | 0.02305 | 0.46508                                                                                                                                             |
| 1535. | BD* | ( 1) | C | 35 | - | H | 68  | 0.01717 | 0.34235                                                                                                                                             |
| 1536. | BD* | ( 1) | C | 36 | - | C | 39  | 0.03217 | 0.32192                                                                                                                                             |
| 1537. | BD* | ( 1) | C | 37 | - | C | 38  | 0.01669 | 0.27981                                                                                                                                             |
| 1538. | BD* | ( 1) | C | 37 | - | C | 55  | 0.01793 | 0.28432                                                                                                                                             |
| 1539. | BD* | ( 1) | C | 37 | - | H | 85  | 0.02520 | 0.30853                                                                                                                                             |
| 1540. | BD* | ( 1) | C | 38 | - | H | 105 | 0.00720 | 0.31659                                                                                                                                             |
| 1541. | BD* | ( 1) | C | 38 | - | H | 106 | 0.00679 | 0.31780                                                                                                                                             |
| 1542. | BD* | ( 1) | C | 38 | - | H | 107 | 0.01082 | 0.31202                                                                                                                                             |
| 1543. | BD* | ( 1) | C | 39 | - | C | 40  | 0.01773 | 0.28181                                                                                                                                             |
| 1544. | BD* | ( 1) | C | 39 | - | C | 56  | 0.01637 | 0.29369                                                                                                                                             |
| 1545. | BD* | ( 1) | C | 39 | - | H | 86  | 0.02379 | 0.31526                                                                                                                                             |
| 1546. | BD* | ( 1) | C | 40 | - | H | 99  | 0.00750 | 0.32021                                                                                                                                             |
| 1547. | BD* | ( 1) | C | 40 | - | H | 100 | 0.01046 | 0.31551                                                                                                                                             |
| 1548. | BD* | ( 1) | C | 40 | - | H | 101 | 0.00695 | 0.32045                                                                                                                                             |
| 1549. | BD* | ( 1) | C | 41 | - | C | 42  | 0.02999 | 0.63774                                                                                                                                             |
| 1550. | BD* | ( 1) | C | 41 | - | C | 46  | 0.03084 | 0.63927                                                                                                                                             |
| 1551. | BD* | ( 2) | C | 41 | - | C | 46  | 0.37132 | 0.02626 1553 (v) , 1558 (v) , 223 (r)<br>1479 (g) , 1475 (v) , 1569 (v)<br>1477 (v) , 1549 (g) , 1570 (v)<br>1550 (g) , 787 (g) , 843 (v) , 788 (g) |
| 1552. | BD* | ( 1) | C | 42 | - | C | 43  | 0.02303 | 0.47717                                                                                                                                             |
| 1553. | BD* | ( 2) | C | 42 | - | C | 43  | 0.33091 | 0.01298 1558 (v) , 1551 (v) , 1563 (v)                                                                                                              |

|       |     |      |   |        |     |         |                            |                             |
|-------|-----|------|---|--------|-----|---------|----------------------------|-----------------------------|
| 1554. | BD* | ( 1) | C | 42 - C | 47  | 0.03204 | 814 (g), 1564 (v), 815 (g) | 0.33798                     |
| 1555. | BD* | ( 1) | C | 43 - C | 44  | 0.01506 |                            | 0.48865                     |
| 1556. | BD* | ( 1) | C | 43 - H | 75  | 0.01779 |                            | 0.35502                     |
| 1557. | BD* | ( 1) | C | 44 - C | 45  | 0.01496 |                            | 0.48977                     |
| 1558. | BD* | ( 2) | C | 44 - C | 45  | 0.33468 | 0.00403                    | 1553 (v), 1551 (v), 829 (g) |
|       |     |      |   |        |     |         |                            | 843 (g)                     |
| 1559. | BD* | ( 1) | C | 44 - H | 74  | 0.01582 |                            | 0.34526                     |
| 1560. | BD* | ( 1) | C | 45 - C | 46  | 0.02319 |                            | 0.47103                     |
| 1561. | BD* | ( 1) | C | 45 - H | 73  | 0.01777 |                            | 0.34587                     |
| 1562. | BD* | ( 1) | C | 46 - C | 49  | 0.03202 |                            | 0.32583                     |
| 1563. | BD* | ( 1) | C | 47 - C | 48  | 0.01776 |                            | 0.29402                     |
| 1564. | BD* | ( 1) | C | 47 - C | 57  | 0.01407 |                            | 0.30738                     |
| 1565. | BD* | ( 1) | C | 47 - H | 80  | 0.02568 |                            | 0.35553                     |
| 1566. | BD* | ( 1) | C | 48 - H | 126 | 0.00771 |                            | 0.33477                     |
| 1567. | BD* | ( 1) | C | 48 - H | 127 | 0.00801 |                            | 0.33974                     |
| 1568. | BD* | ( 1) | C | 48 - H | 128 | 0.01041 |                            | 0.32767                     |
| 1569. | BD* | ( 1) | C | 49 - C | 50  | 0.01781 |                            | 0.28319                     |
| 1570. | BD* | ( 1) | C | 49 - C | 58  | 0.01742 |                            | 0.28894                     |
| 1571. | BD* | ( 1) | C | 49 - H | 79  | 0.02452 |                            | 0.32096                     |
| 1572. | BD* | ( 1) | C | 50 - H | 129 | 0.00762 |                            | 0.32054                     |
| 1573. | BD* | ( 1) | C | 50 - H | 130 | 0.01064 |                            | 0.31734                     |
| 1574. | BD* | ( 1) | C | 50 - H | 131 | 0.00691 |                            | 0.32406                     |
| 1575. | BD* | ( 1) | C | 51 - C | 52  | 0.01736 |                            | 0.28291                     |
| 1576. | BD* | ( 1) | C | 51 - C | 59  | 0.01808 |                            | 0.28864                     |
| 1577. | BD* | ( 1) | C | 51 - H | 81  | 0.02484 |                            | 0.31987                     |
| 1578. | BD* | ( 1) | C | 52 - H | 114 | 0.00758 |                            | 0.32098                     |
| 1579. | BD* | ( 1) | C | 52 - H | 115 | 0.00682 |                            | 0.32379                     |
| 1580. | BD* | ( 1) | C | 52 - H | 116 | 0.01069 |                            | 0.31728                     |
| 1581. | BD* | ( 1) | C | 53 - C | 54  | 0.01793 |                            | 0.29367                     |
| 1582. | BD* | ( 1) | C | 53 - C | 60  | 0.01440 |                            | 0.30966                     |
| 1583. | BD* | ( 1) | C | 53 - H | 82  | 0.02457 |                            | 0.35020                     |
| 1584. | BD* | ( 1) | C | 54 - H | 117 | 0.00781 |                            | 0.33391                     |
| 1585. | BD* | ( 1) | C | 54 - H | 118 | 0.01050 |                            | 0.32745                     |
| 1586. | BD* | ( 1) | C | 54 - H | 119 | 0.00765 |                            | 0.33710                     |
| 1587. | BD* | ( 1) | C | 55 - H | 108 | 0.00767 |                            | 0.32215                     |
| 1588. | BD* | ( 1) | C | 55 - H | 109 | 0.01032 |                            | 0.31999                     |
| 1589. | BD* | ( 1) | C | 55 - H | 110 | 0.00695 |                            | 0.34672                     |
| 1590. | BD* | ( 1) | C | 56 - H | 102 | 0.00705 |                            | 0.32957                     |
| 1591. | BD* | ( 1) | C | 56 - H | 103 | 0.00748 |                            | 0.35656                     |
| 1592. | BD* | ( 1) | C | 56 - H | 104 | 0.01059 |                            | 0.32491                     |
| 1593. | BD* | ( 1) | C | 57 - H | 123 | 0.00670 |                            | 0.35046                     |
| 1594. | BD* | ( 1) | C | 57 - H | 124 | 0.01162 |                            | 0.33261                     |
| 1595. | BD* | ( 1) | C | 57 - H | 125 | 0.00660 |                            | 0.34904                     |
| 1596. | BD* | ( 1) | C | 58 - H | 132 | 0.00758 |                            | 0.32308                     |
| 1597. | BD* | ( 1) | C | 58 - H | 133 | 0.00692 |                            | 0.34711                     |
| 1598. | BD* | ( 1) | C | 58 - H | 134 | 0.01074 |                            | 0.31874                     |
| 1599. | BD* | ( 1) | C | 59 - H | 111 | 0.00771 |                            | 0.32248                     |
| 1600. | BD* | ( 1) | C | 59 - H | 112 | 0.01068 |                            | 0.31907                     |
| 1601. | BD* | ( 1) | C | 59 - H | 113 | 0.00685 |                            | 0.34276                     |
| 1602. | BD* | ( 1) | C | 60 - H | 120 | 0.00651 |                            | 0.35076                     |
| 1603. | BD* | ( 1) | C | 60 - H | 121 | 0.00663 |                            | 0.36399                     |
| 1604. | BD* | ( 1) | C | 60 - H | 122 | 0.01163 |                            | 0.33398                     |
| 1605. | BD* | ( 1) | C | 61 - H | 96  | 0.00764 |                            | 0.32425                     |
| 1606. | BD* | ( 1) | C | 61 - H | 97  | 0.00685 |                            | 0.34830                     |
| 1607. | BD* | ( 1) | C | 61 - H | 98  | 0.01033 |                            | 0.32136                     |
| 1608. | BD* | ( 1) | C | 62 - H | 87  | 0.00677 |                            | 0.33607                     |
| 1609. | BD* | ( 1) | C | 62 - H | 88  | 0.01126 |                            | 0.32918                     |
| 1610. | BD* | ( 1) | C | 62 - H | 89  | 0.00967 |                            | 0.36987                     |

```

-----
      Total Lewis  436.90072  ( 97.5225%)
Valence non-Lewis  10.37751  (  2.3164%)
Rydberg non-Lewis   0.72177  (  0.1611%)
-----

```

```

      Total unit  1  448.00000  (100.0000%)
      Charge unit  1    0.00000

```

NATURAL LOCALIZED MOLECULAR ORBITAL (NLMO) ANALYSIS:

Highest occupied NBOs are not at the beginning of the NBO list;



The NLMO program is not currently set up to handle this.

|                  |      |      |      |      |      |      |      |      |      |      |
|------------------|------|------|------|------|------|------|------|------|------|------|
| Sorting of NBOs: | 160  | 178  | 175  | 169  | 167  | 174  | 168  | 177  | 176  | 189  |
| Sorting of NBOs: | 179  | 199  | 170  | 171  | 162  | 195  | 187  | 197  | 209  | 207  |
| Sorting of NBOs: | 190  | 194  | 159  | 185  | 184  | 192  | 204  | 163  | 196  | 180  |
| Sorting of NBOs: | 191  | 200  | 193  | 188  | 198  | 161  | 208  | 210  | 211  | 205  |
| Sorting of NBOs: | 202  | 165  | 186  | 182  | 213  | 217  | 203  | 164  | 216  | 183  |
| Sorting of NBOs: | 219  | 201  | 166  | 181  | 212  | 206  | 214  | 215  | 220  | 218  |
| Sorting of NBOs: | 172  | 173  | 1    | 36   | 34   | 37   | 42   | 44   | 23   | 22   |
| Sorting of NBOs: | 20   | 25   | 38   | 11   | 26   | 39   | 28   | 79   | 77   | 72   |
| Sorting of NBOs: | 71   | 74   | 82   | 105  | 14   | 53   | 46   | 103  | 17   | 51   |
| Sorting of NBOs: | 45   | 9    | 56   | 108  | 12   | 48   | 5    | 100  | 6    | 221  |
| Sorting of NBOs: | 76   | 84   | 58   | 110  | 13   | 50   | 85   | 102  | 8    | 65   |
| Sorting of NBOs: | 86   | 91   | 117  | 123  | 124  | 66   | 118  | 92   | 59   | 60   |
| Sorting of NBOs: | 112  | 130  | 129  | 111  | 43   | 41   | 24   | 33   | 31   | 30   |
| Sorting of NBOs: | 81   | 78   | 83   | 109  | 16   | 107  | 57   | 18   | 55   | 104  |
| Sorting of NBOs: | 19   | 52   | 90   | 89   | 88   | 69   | 95   | 70   | 96   | 68   |
| Sorting of NBOs: | 128  | 121  | 94   | 122  | 127  | 126  | 120  | 63   | 136  | 148  |
| Sorting of NBOs: | 146  | 155  | 135  | 147  | 64   | 144  | 62   | 153  | 149  | 145  |
| Sorting of NBOs: | 137  | 140  | 154  | 134  | 115  | 87   | 133  | 138  | 116  | 132  |
| Sorting of NBOs: | 67   | 142  | 157  | 114  | 139  | 125  | 152  | 93   | 119  | 156  |
| Sorting of NBOs: | 143  | 141  | 151  | 158  | 150  | 61   | 97   | 4    | 131  | 113  |
| Sorting of NBOs: | 98   | 3    | 35   | 32   | 21   | 40   | 2    | 225  | 29   | 73   |
| Sorting of NBOs: | 80   | 27   | 75   | 47   | 10   | 106  | 15   | 54   | 101  | 7    |
| Sorting of NBOs: | 49   | 99   | 222  | 1487 | 1473 | 1492 | 1481 | 1532 | 1527 | 1525 |
| Sorting of NBOs: | 1558 | 1467 | 1506 | 1499 | 1462 | 1553 | 1459 | 1501 | 1551 | 224  |
| Sorting of NBOs: | 223  | 1454 | 1537 | 1517 | 1543 | 1575 | 1569 | 1538 | 1511 | 1518 |
| Sorting of NBOs: | 1576 | 1490 | 1570 | 1496 | 1581 | 1544 | 1563 | 1512 | 1478 | 1564 |
| Sorting of NBOs: | 1539 | 1463 | 1582 | 1542 | 1519 | 1545 | 1547 | 1521 | 1540 | 1528 |
| Sorting of NBOs: | 1495 | 1580 | 1573 | 1541 | 1598 | 1520 | 1600 | 1493 | 1577 | 1588 |
| Sorting of NBOs: | 1546 | 1522 | 1548 | 1572 | 1571 | 1578 | 1607 | 1516 | 1536 | 1587 |
| Sorting of NBOs: | 1599 | 1510 | 1596 | 1579 | 1574 | 1514 | 1605 | 1465 | 1592 | 1513 |
| Sorting of NBOs: | 1562 | 1585 | 1568 | 1515 | 1494 | 1609 | 1590 | 1502 | 1594 | 1455 |
| Sorting of NBOs: | 1584 | 1604 | 1489 | 1566 | 1482 | 1483 | 1608 | 1586 | 1460 | 1554 |
| Sorting of NBOs: | 1533 | 1530 | 1567 | 1477 | 1535 | 1601 | 1474 | 1470 | 1468 | 1559 |
| Sorting of NBOs: | 1561 | 1507 | 1589 | 1509 | 1597 | 1475 | 1606 | 1472 | 1595 | 1583 |
| Sorting of NBOs: | 1593 | 1602 | 1488 | 1486 | 1504 | 1556 | 1471 | 1565 | 1591 | 1603 |
| Sorting of NBOs: | 1610 | 1485 | 1476 | 1523 | 1524 | 1456 | 1498 | 1497 | 1461 | 1457 |
| Sorting of NBOs: | 1526 | 1534 | 1508 | 1560 | 1464 | 1491 | 1552 | 1458 | 1529 | 1500 |
| Sorting of NBOs: | 1531 | 1484 | 1469 | 1555 | 1466 | 1557 | 1505 | 1503 | 1480 | 1453 |
| Sorting of NBOs: | 843  | 298  | 312  | 829  | 564  | 550  | 704  | 231  | 690  | 478  |
| Sorting of NBOs: | 1438 | 1128 | 1143 | 1168 | 1118 | 1153 | 1103 | 464  | 1113 | 1258 |
| Sorting of NBOs: | 1158 | 1549 | 1550 | 1318 | 1333 | 394  | 380  | 410  | 521  | 1348 |
| Sorting of NBOs: | 1423 | 1243 | 1303 | 1273 | 1213 | 1308 | 1198 | 243  | 326  | 1228 |
| Sorting of NBOs: | 1288 | 676  | 1208 | 857  | 1393 | 647  | 451  | 814  | 1188 | 1363 |
| Sorting of NBOs: | 269  | 1408 | 507  | 1283 | 1253 | 744  | 1178 | 1353 | 1203 | 1009 |
| Sorting of NBOs: | 1418 | 632  | 939  | 787  | 718  | 241  | 911  | 1368 | 256  | 577  |
| Sorting of NBOs: | 940  | 745  | 1433 | 772  | 1238 | 1067 | 1378 | 366  | 1193 | 1079 |
| Sorting of NBOs: | 912  | 424  | 633  | 801  | 1025 | 1388 | 1183 | 493  | 1403 | 536  |
| Sorting of NBOs: | 1338 | 1323 | 997  | 1037 | 535  | 1010 | 240  | 1080 | 338  | 1398 |
| Sorting of NBOs: | 1052 | 1278 | 773  | 1173 | 1039 | 1383 | 662  | 1443 | 604  | 1428 |
| Sorting of NBOs: | 967  | 425  | 605  | 884  | 1358 | 1263 | 1051 | 1218 | 230  | 883  |
| Sorting of NBOs: | 284  | 815  | 1024 | 968  | 1328 | 1248 | 983  | 1038 | 1448 | 1313 |
| Sorting of NBOs: | 1298 | 675  | 1066 | 661  | 996  | 1023 | 995  | 981  | 1065 | 452  |
| Sorting of NBOs: | 283  | 522  | 982  | 1293 | 899  | 1373 | 927  | 508  | 1268 | 325  |
| Sorting of NBOs: | 858  | 1479 | 663  | 719  | 802  | 226  | 591  | 285  | 1233 | 634  |
| Sorting of NBOs: | 620  | 941  | 494  | 913  | 257  | 732  | 746  | 953  | 869  | 453  |
| Sorting of NBOs: | 800  | 523  | 557  | 578  | 396  | 340  | 382  | 871  | 777  | 590  |
| Sorting of NBOs: | 356  | 1081 | 749  | 495  | 368  | 1413 | 703  | 255  | 480  | 648  |
| Sorting of NBOs: | 774  | 369  | 1040 | 563  | 579  | 885  | 835  | 760  | 1101 | 1141 |
| Sorting of NBOs: | 297  | 842  | 954  | 758  | 1011 | 730  | 466  | 897  | 618  | 717  |
| Sorting of NBOs: | 1123 | 925  | 637  | 1136 | 1223 | 1163 | 870  | 1053 | 409  | 1110 |
| Sorting of NBOs: | 969  | 1054 | 606  | 856  | 397  | 481  | 270  | 830  | 1096 | 467  |
| Sorting of NBOs: | 1148 | 1150 | 305  | 955  | 902  | 828  | 827  | 689  | 623  | 688  |
| Sorting of NBOs: | 310  | 383  | 311  | 549  | 696  | 1125 | 411  | 984  | 548  | 691  |
| Sorting of NBOs: | 1108 | 1165 | 930  | 426  | 437  | 944  | 1343 | 242  | 506  | 1082 |
| Sorting of NBOs: | 551  | 956  | 479  | 786  | 683  | 520  | 677  | 646  | 816  | 327  |
| Sorting of NBOs: | 844  | 395  | 415  | 299  | 569  | 537  | 465  | 705  | 381  | 972  |
| Sorting of NBOs: | 698  | 735  | 916  | 872  | 268  | 254  | 423  | 1012 | 799  | 431  |
| Sorting of NBOs: | 565  | 1030 | 1026 | 341  | 320  | 763  | 716  | 492  | 998  | 339  |
| Sorting of NBOs: | 702  | 855  | 660  | 576  | 282  | 324  | 888  | 357  | 841  | 674  |
| Sorting of NBOs: | 813  | 609  | 296  | 562  | 534  | 484  | 367  | 314  | 754  | 833  |

|                  |      |      |      |      |      |      |      |      |      |      |
|------------------|------|------|------|------|------|------|------|------|------|------|
| Sorting of NBOs: | 485  | 438  | 271  | 593  | 594  | 971  | 788  | 421  | 353  | 318  |
| Sorting of NBOs: | 1072 | 607  | 450  | 543  | 850  | 611  | 837  | 319  | 483  | 810  |
| Sorting of NBOs: | 333  | 946  | 898  | 592  | 470  | 727  | 655  | 385  | 926  | 386  |
| Sorting of NBOs: | 408  | 439  | 469  | 265  | 1068 | 399  | 440  | 708  | 886  | 988  |
| Sorting of NBOs: | 435  | 739  | 442  | 401  | 821  | 1084 | 1316 | 731  | 471  | 759  |
| Sorting of NBOs: | 1027 | 619  | 695  | 555  | 359  | 293  | 775  | 866  | 387  | 1069 |
| Sorting of NBOs: | 665  | 1356 | 1013 | 641  | 355  | 792  | 915  | 1256 | 1436 | 974  |
| Sorting of NBOs: | 400  | 936  | 649  | 259  | 742  | 1361 | 680  | 823  | 427  | 789  |
| Sorting of NBOs: | 1251 | 793  | 570  | 1001 | 762  | 874  | 1164 | 734  | 1286 | 1094 |
| Sorting of NBOs: | 958  | 1083 | 1109 | 848  | 1149 | 1281 | 1124 | 1311 | 595  | 443  |
| Sorting of NBOs: | 1431 | 671  | 422  | 541  | 1236 | 1271 | 747  | 942  | 558  | 1139 |
| Sorting of NBOs: | 531  | 313  | 1170 | 1130 | 441  | 352  | 304  | 1099 | 914  | 653  |
| Sorting of NBOs: | 544  | 1058 | 635  | 1134 | 509  | 1056 | 804  | 1451 | 1155 | 1416 |
| Sorting of NBOs: | 513  | 1306 | 1041 | 1376 | 354  | 1426 | 1411 | 1246 | 1115 | 1276 |
| Sorting of NBOs: | 1231 | 622  | 574  | 1351 | 1366 | 737  | 525  | 236  | 1341 | 276  |
| Sorting of NBOs: | 710  | 1241 | 629  | 1421 | 1391 | 1269 | 1301 | 336  | 901  | 275  |
| Sorting of NBOs: | 713  | 1044 | 1371 | 1014 | 587  | 1449 | 1221 | 720  | 770  | 852  |
| Sorting of NBOs: | 820  | 554  | 847  | 582  | 790  | 417  | 331  | 468  | 515  | 851  |
| Sorting of NBOs: | 909  | 1045 | 482  | 1401 | 1216 | 288  | 1290 | 985  | 1000 | 624  |
| Sorting of NBOs: | 258  | 1389 | 694  | 1396 | 552  | 929  | 1324 | 1326 | 714  | 765  |
| Sorting of NBOs: | 302  | 234  | 943  | 819  | 1240 | 1299 | 229  | 1380 | 681  | 722  |
| Sorting of NBOs: | 384  | 1098 | 1138 | 860  | 398  | 685  | 1370 | 330  | 447  | 934  |
| Sorting of NBOs: | 524  | 1070 | 920  | 861  | 766  | 1304 | 932  | 1414 | 287  | 890  |
| Sorting of NBOs: | 1381 | 1399 | 1429 | 1314 | 1249 | 1215 | 1160 | 476  | 512  | 1315 |
| Sorting of NBOs: | 1420 | 1093 | 1219 | 1336 | 1133 | 803  | 1359 | 1244 | 1279 | 1289 |
| Sorting of NBOs: | 1250 | 794  | 1335 | 1235 | 1285 | 1349 | 1360 | 1435 | 986  | 1055 |
| Sorting of NBOs: | 1406 | 1274 | 1220 | 1430 | 1320 | 1355 | 1260 | 1305 | 1415 | 709  |
| Sorting of NBOs: | 1234 | 1280 | 692  | 1104 | 1395 | 873  | 1424 | 322  | 711  | 316  |
| Sorting of NBOs: | 1350 | 1245 | 1275 | 900  | 1339 | 1364 | 436  | 651  | 306  | 957  |
| Sorting of NBOs: | 636  | 1425 | 1239 | 1374 | 761  | 1309 | 1229 | 1440 | 412  | 581  |
| Sorting of NBOs: | 1375 | 1446 | 889  | 580  | 560  | 1409 | 277  | 1254 | 335  | 849  |
| Sorting of NBOs: | 1369 | 1419 | 1259 | 1379 | 780  | 666  | 723  | 601  | 402  | 1400 |
| Sorting of NBOs: | 1441 | 999  | 307  | 701  | 667  | 1346 | 568  | 805  | 1319 | 859  |
| Sorting of NBOs: | 1439 | 598  | 678  | 1334 | 1386 | 1230 | 1224 | 488  | 1340 | 863  |
| Sorting of NBOs: | 1295 | 904  | 627  | 959  | 428  | 621  | 791  | 1445 | 733  | 862  |
| Sorting of NBOs: | 664  | 1344 | 1321 | 807  | 1365 | 566  | 1225 | 538  | 1410 | 1261 |
| Sorting of NBOs: | 1266 | 1028 | 834  | 721  | 1310 | 289  | 1120 | 895  | 991  | 300  |
| Sorting of NBOs: | 389  | 1450 | 928  | 1265 | 290  | 845  | 583  | 650  | 950  | 1394 |
| Sorting of NBOs: | 328  | 1214 | 977  | 286  | 706  | 540  | 817  | 831  | 1385 | 1331 |
| Sorting of NBOs: | 1291 | 1270 | 527  | 545  | 1255 | 363  | 764  | 668  | 1175 | 1296 |
| Sorting of NBOs: | 1226 | 1195 | 776  | 652  | 1390 | 781  | 1210 | 358  | 1330 | 272  |
| Sorting of NBOs: | 429  | 879  | 490  | 1300 | 514  | 1434 | 887  | 1354 | 1284 | 1144 |
| Sorting of NBOs: | 274  | 614  | 1100 | 528  | 473  | 526  | 876  | 260  | 1205 | 907  |
| Sorting of NBOs: | 1050 | 262  | 1145 | 906  | 806  | 596  | 1404 | 1325 | 1185 | 233  |
| Sorting of NBOs: | 767  | 390  | 573  | 839  | 654  | 610  | 964  | 973  | 922  | 487  |
| Sorting of NBOs: | 406  | 475  | 404  | 724  | 584  | 510  | 1405 | 597  | 1095 | 1200 |
| Sorting of NBOs: | 1140 | 608  | 625  | 1135 | 1181 | 615  | 896  | 840  | 963  | 600  |
| Sorting of NBOs: | 1018 | 935  | 796  | 877  | 273  | 261  | 279  | 918  | 628  | 903  |
| Sorting of NBOs: | 1131 | 945  | 303  | 1190 | 1126 | 1166 | 1121 | 1116 | 684  | 1171 |
| Sorting of NBOs: | 1106 | 1151 | 1156 | 1146 | 931  | 682  | 571  | 1191 | 750  | 1016 |
| Sorting of NBOs: | 517  | 511  | 1111 | 586  | 736  | 1022 | 1161 | 626  | 1004 | 923  |
| Sorting of NBOs: | 1119 | 784  | 1007 | 824  | 643  | 970  | 1180 | 227  | 1201 | 561  |
| Sorting of NBOs: | 1086 | 1088 | 785  | 1105 | 905  | 572  | 317  | 1035 | 1345 | 542  |
| Sorting of NBOs: | 961  | 1062 | 979  | 738  | 539  | 656  | 880  | 748  | 700  | 1060 |
| Sorting of NBOs: | 960  | 875  | 756  | 1206 | 818  | 321  | 640  | 768  | 933  | 1159 |
| Sorting of NBOs: | 975  | 978  | 1211 | 924  | 753  | 332  | 878  | 1090 | 1186 | 391  |
| Sorting of NBOs: | 329  | 891  | 1209 | 779  | 1071 | 962  | 825  | 1085 | 757  | 292  |
| Sorting of NBOs: | 1042 | 752  | 639  | 952  | 822  | 864  | 893  | 638  | 1015 | 599  |
| Sorting of NBOs: | 1194 | 612  | 1029 | 919  | 740  | 751  | 434  | 1032 | 1129 | 1184 |
| Sorting of NBOs: | 1174 | 1196 | 1114 | 392  | 1204 | 1049 | 1169 | 1176 | 1154 | 669  |
| Sorting of NBOs: | 725  | 617  | 496  | 948  | 342  | 1091 | 235  | 1075 | 228  | 1003 |
| Sorting of NBOs: | 1076 | 1002 | 686  | 989  | 642  | 361  | 1074 | 976  | 454  | 1043 |
| Sorting of NBOs: | 644  | 613  | 1092 | 949  | 990  | 782  | 370  | 308  | 445  | 1031 |
| Sorting of NBOs: | 1057 | 1078 | 489  | 474  | 809  | 1020 | 697  | 1063 | 670  | 263  |
| Sorting of NBOs: | 741  | 334  | 1199 | 264  | 602  | 529  | 1073 | 679  | 994  | 546  |
| Sorting of NBOs: | 769  | 405  | 707  | 630  | 894  | 532  | 1017 | 585  | 658  | 1444 |
| Sorting of NBOs: | 987  | 280  | 726  | 446  | 518  | 501  | 344  | 498  | 266  | 712  |
| Sorting of NBOs: | 1033 | 553  | 778  | 808  | 459  | 1384 | 811  | 588  | 908  | 881  |
| Sorting of NBOs: | 418  | 1189 | 232  | 836  | 937  | 372  | 965  | 832  | 728  | 1264 |
| Sorting of NBOs: | 315  | 291  | 456  | 657  | 294  | 797  | 371  | 1329 | 846  | 1179 |
| Sorting of NBOs: | 672  | 362  | 993  | 1097 | 867  | 530  | 1005 | 865  | 567  | 556  |

|                                 |      |      |      |      |      |      |      |      |      |      |
|---------------------------------|------|------|------|------|------|------|------|------|------|------|
| Sorting of NBOs:                | 1034 | 1046 | 1006 | 301  | 343  | 497  | 237  | 516  | 1102 | 278  |
| Sorting of NBOs:                | 693  | 448  | 1137 | 1087 | 1294 | 345  | 1047 | 853  | 795  | 1061 |
| Sorting of NBOs:                | 414  | 1142 | 374  | 455  | 1019 | 364  | 503  | 500  | 457  | 462  |
| Sorting of NBOs:                | 917  | 377  | 238  | 1059 | 1402 | 444  | 1252 | 1282 | 1222 | 486  |
| Sorting of NBOs:                | 502  | 1227 | 1362 | 350  | 1232 | 1317 | 1432 | 1272 | 1342 | 1452 |
| Sorting of NBOs:                | 403  | 1327 | 1302 | 1367 | 1277 | 1312 | 249  | 1307 | 1412 | 1237 |
| Sorting of NBOs:                | 1352 | 1247 | 1427 | 1337 | 1357 | 1257 | 1287 | 1437 | 1322 | 1377 |
| Sorting of NBOs:                | 1447 | 1217 | 375  | 1122 | 1372 | 1417 | 1382 | 1242 | 1397 | 1422 |
| Sorting of NBOs:                | 1132 | 1392 | 1162 | 1172 | 1442 | 1292 | 1107 | 1262 | 252  | 1157 |
| Sorting of NBOs:                | 1407 | 1147 | 1117 | 1332 | 1267 | 460  | 1297 | 1127 | 1387 | 1347 |
| Sorting of NBOs:                | 1167 | 1152 | 1112 | 378  | 349  | 388  | 461  | 472  | 376  | 1202 |
| Sorting of NBOs:                | 420  | 504  | 1207 | 1192 | 1212 | 1182 | 348  | 1187 | 1197 | 1177 |
| Sorting of NBOs:                | 947  | 250  | 245  | 346  | 360  | 247  | 432  | 347  | 251  | 373  |
| Sorting of NBOs:                | 246  | 413  | 458  | 499  | 433  | 248  | 419  | 244  | 416  | 430  |
| Sorting of NBOs:                | 951  | 783  | 921  | 645  | 239  | 755  | 449  | 365  | 1021 | 616  |
| Sorting of NBOs:                | 1089 | 980  | 892  | 1064 | 1048 | 1036 | 992  | 1077 | 1008 | 882  |
| Sorting of NBOs:                | 966  | 826  | 547  | 687  | 603  | 854  | 309  | 337  | 575  | 938  |
| Sorting of NBOs:                | 715  | 559  | 673  | 743  | 910  | 533  | 631  | 295  | 519  | 838  |
| Sorting of NBOs:                | 729  | 771  | 323  | 868  | 393  | 477  | 699  | 407  | 589  | 812  |
| Sorting of NBOs:                | 267  | 491  | 798  | 281  | 659  | 351  | 505  | 463  | 379  | 253  |
| Reordering of NBOs for storage: | 160  | 178  | 175  | 169  | 167  | 174  | 168  | 177  | 176  | 189  |
| Reordering of NBOs for storage: | 179  | 199  | 170  | 171  | 162  | 195  | 187  | 197  | 209  | 207  |
| Reordering of NBOs for storage: | 190  | 194  | 159  | 185  | 184  | 192  | 204  | 163  | 196  | 180  |
| Reordering of NBOs for storage: | 191  | 200  | 193  | 188  | 198  | 161  | 208  | 210  | 211  | 205  |
| Reordering of NBOs for storage: | 202  | 165  | 186  | 182  | 213  | 217  | 203  | 164  | 216  | 183  |
| Reordering of NBOs for storage: | 219  | 201  | 166  | 181  | 212  | 206  | 214  | 215  | 220  | 218  |
| Reordering of NBOs for storage: | 172  | 173  | 1    | 36   | 34   | 37   | 42   | 44   | 23   | 22   |
| Reordering of NBOs for storage: | 20   | 25   | 38   | 11   | 26   | 39   | 28   | 79   | 77   | 72   |
| Reordering of NBOs for storage: | 71   | 74   | 82   | 105  | 14   | 53   | 46   | 103  | 17   | 51   |
| Reordering of NBOs for storage: | 45   | 9    | 56   | 108  | 12   | 48   | 5    | 100  | 6    | 221  |
| Reordering of NBOs for storage: | 76   | 84   | 58   | 110  | 13   | 50   | 85   | 102  | 8    | 65   |
| Reordering of NBOs for storage: | 86   | 91   | 117  | 123  | 124  | 66   | 118  | 92   | 59   | 60   |
| Reordering of NBOs for storage: | 112  | 130  | 129  | 111  | 43   | 41   | 24   | 33   | 31   | 30   |
| Reordering of NBOs for storage: | 81   | 78   | 83   | 109  | 16   | 107  | 57   | 18   | 55   | 104  |
| Reordering of NBOs for storage: | 19   | 52   | 90   | 89   | 88   | 69   | 95   | 70   | 96   | 68   |
| Reordering of NBOs for storage: | 128  | 121  | 94   | 122  | 127  | 126  | 120  | 63   | 136  | 148  |
| Reordering of NBOs for storage: | 146  | 155  | 135  | 147  | 64   | 144  | 62   | 153  | 149  | 145  |
| Reordering of NBOs for storage: | 137  | 140  | 154  | 134  | 115  | 87   | 133  | 138  | 116  | 132  |
| Reordering of NBOs for storage: | 67   | 142  | 157  | 114  | 139  | 125  | 152  | 93   | 119  | 156  |
| Reordering of NBOs for storage: | 143  | 141  | 151  | 158  | 150  | 61   | 97   | 4    | 131  | 113  |
| Reordering of NBOs for storage: | 98   | 3    | 35   | 32   | 21   | 40   | 2    | 225  | 29   | 73   |
| Reordering of NBOs for storage: | 80   | 27   | 75   | 47   | 10   | 106  | 15   | 54   | 101  | 7    |
| Reordering of NBOs for storage: | 49   | 99   | 222  | 224  | 1487 | 1473 | 1492 | 1481 | 1532 | 1527 |
| Reordering of NBOs for storage: | 1525 | 1558 | 1467 | 1506 | 1499 | 1462 | 1553 | 1459 | 1501 | 1551 |
| Reordering of NBOs for storage: | 223  | 1454 | 1537 | 1517 | 1543 | 1575 | 1569 | 1538 | 1511 | 1518 |
| Reordering of NBOs for storage: | 1576 | 1490 | 1570 | 1496 | 1581 | 1544 | 1563 | 1512 | 1478 | 1564 |
| Reordering of NBOs for storage: | 1539 | 1463 | 1582 | 1542 | 1519 | 1545 | 1547 | 1521 | 1540 | 1528 |
| Reordering of NBOs for storage: | 1495 | 1580 | 1573 | 1541 | 1598 | 1520 | 1600 | 1493 | 1577 | 1588 |
| Reordering of NBOs for storage: | 1546 | 1522 | 1548 | 1572 | 1571 | 1578 | 1607 | 1516 | 1536 | 1587 |
| Reordering of NBOs for storage: | 1599 | 1510 | 1596 | 1579 | 1574 | 1514 | 1605 | 1465 | 1592 | 1513 |
| Reordering of NBOs for storage: | 1562 | 1585 | 1568 | 1515 | 1494 | 1609 | 1590 | 1502 | 1594 | 1455 |
| Reordering of NBOs for storage: | 1584 | 1604 | 1489 | 1566 | 1482 | 1483 | 1608 | 1586 | 1460 | 1554 |
| Reordering of NBOs for storage: | 1533 | 1530 | 1567 | 1477 | 1535 | 1601 | 1474 | 1470 | 1468 | 1559 |
| Reordering of NBOs for storage: | 1561 | 1507 | 1589 | 1509 | 1597 | 1475 | 1606 | 1472 | 1595 | 1583 |
| Reordering of NBOs for storage: | 1593 | 1602 | 1488 | 1486 | 1504 | 1556 | 1471 | 1565 | 1591 | 1603 |
| Reordering of NBOs for storage: | 1610 | 1485 | 1476 | 1523 | 1524 | 1456 | 1498 | 1497 | 1461 | 1457 |
| Reordering of NBOs for storage: | 1526 | 1534 | 1508 | 1560 | 1464 | 1491 | 1552 | 1458 | 1529 | 1500 |
| Reordering of NBOs for storage: | 1531 | 1484 | 1469 | 1555 | 1466 | 1557 | 1505 | 1503 | 1480 | 1453 |
| Reordering of NBOs for storage: | 1549 | 1550 | 1479 | 843  | 298  | 312  | 829  | 564  | 550  | 704  |
| Reordering of NBOs for storage: | 231  | 690  | 478  | 1438 | 1128 | 1143 | 1168 | 1118 | 1153 | 1103 |
| Reordering of NBOs for storage: | 464  | 1113 | 1258 | 1158 | 1318 | 1333 | 394  | 380  | 410  | 521  |
| Reordering of NBOs for storage: | 1348 | 1423 | 1243 | 1303 | 1273 | 1213 | 1308 | 1198 | 243  | 326  |
| Reordering of NBOs for storage: | 1228 | 1288 | 676  | 1208 | 857  | 1393 | 647  | 451  | 814  | 1188 |
| Reordering of NBOs for storage: | 1363 | 269  | 1408 | 507  | 1283 | 1253 | 744  | 1178 | 1353 | 1203 |
| Reordering of NBOs for storage: | 1009 | 1418 | 632  | 939  | 787  | 718  | 241  | 911  | 1368 | 256  |
| Reordering of NBOs for storage: | 577  | 940  | 745  | 1433 | 772  | 1238 | 1067 | 1378 | 366  | 1193 |
| Reordering of NBOs for storage: | 1079 | 912  | 424  | 633  | 801  | 1025 | 1388 | 1183 | 493  | 1403 |
| Reordering of NBOs for storage: | 536  | 1338 | 1323 | 997  | 1037 | 535  | 1010 | 240  | 1080 | 338  |
| Reordering of NBOs for storage: | 1398 | 1052 | 1278 | 773  | 1173 | 1039 | 1383 | 662  | 1443 | 604  |
| Reordering of NBOs for storage: | 1428 | 967  | 425  | 605  | 884  | 1358 | 1263 | 1051 | 1218 | 230  |
| Reordering of NBOs for storage: | 883  | 284  | 815  | 1024 | 968  | 1328 | 1248 | 983  | 1038 | 1448 |

|                                 |      |      |      |      |      |      |      |      |      |      |
|---------------------------------|------|------|------|------|------|------|------|------|------|------|
| Reordering of NBOs for storage: | 1313 | 1298 | 675  | 1066 | 661  | 996  | 1023 | 995  | 981  | 1065 |
| Reordering of NBOs for storage: | 452  | 283  | 522  | 982  | 1293 | 899  | 1373 | 927  | 508  | 1268 |
| Reordering of NBOs for storage: | 325  | 858  | 663  | 719  | 802  | 226  | 591  | 285  | 1233 | 634  |
| Reordering of NBOs for storage: | 620  | 941  | 494  | 913  | 257  | 732  | 746  | 953  | 869  | 453  |
| Reordering of NBOs for storage: | 800  | 523  | 557  | 578  | 396  | 340  | 382  | 871  | 777  | 590  |
| Reordering of NBOs for storage: | 356  | 1081 | 749  | 495  | 368  | 1413 | 703  | 255  | 480  | 648  |
| Reordering of NBOs for storage: | 774  | 369  | 1040 | 563  | 579  | 885  | 835  | 760  | 1101 | 1141 |
| Reordering of NBOs for storage: | 297  | 842  | 954  | 758  | 1011 | 730  | 466  | 897  | 618  | 717  |
| Reordering of NBOs for storage: | 1123 | 925  | 637  | 1136 | 1223 | 1163 | 870  | 1053 | 409  | 1110 |
| Reordering of NBOs for storage: | 969  | 1054 | 606  | 856  | 397  | 481  | 270  | 830  | 1096 | 467  |
| Reordering of NBOs for storage: | 1148 | 1150 | 305  | 955  | 902  | 828  | 827  | 689  | 623  | 688  |
| Reordering of NBOs for storage: | 310  | 383  | 311  | 549  | 696  | 1125 | 411  | 984  | 548  | 691  |
| Reordering of NBOs for storage: | 1108 | 1165 | 930  | 426  | 437  | 944  | 1343 | 242  | 506  | 1082 |
| Reordering of NBOs for storage: | 551  | 956  | 479  | 786  | 683  | 520  | 677  | 646  | 816  | 327  |
| Reordering of NBOs for storage: | 844  | 395  | 415  | 299  | 569  | 537  | 465  | 705  | 381  | 972  |
| Reordering of NBOs for storage: | 698  | 735  | 916  | 872  | 268  | 254  | 423  | 1012 | 799  | 431  |
| Reordering of NBOs for storage: | 565  | 1030 | 1026 | 341  | 320  | 763  | 716  | 492  | 998  | 339  |
| Reordering of NBOs for storage: | 702  | 855  | 660  | 576  | 282  | 324  | 888  | 357  | 841  | 674  |
| Reordering of NBOs for storage: | 813  | 609  | 296  | 562  | 534  | 484  | 367  | 314  | 754  | 833  |
| Reordering of NBOs for storage: | 485  | 438  | 271  | 593  | 594  | 971  | 788  | 421  | 353  | 318  |
| Reordering of NBOs for storage: | 1072 | 607  | 450  | 543  | 850  | 611  | 837  | 319  | 483  | 810  |
| Reordering of NBOs for storage: | 333  | 946  | 898  | 592  | 470  | 727  | 655  | 385  | 926  | 386  |
| Reordering of NBOs for storage: | 408  | 439  | 469  | 265  | 1068 | 399  | 440  | 708  | 886  | 988  |
| Reordering of NBOs for storage: | 435  | 739  | 442  | 401  | 821  | 1084 | 1316 | 731  | 471  | 759  |
| Reordering of NBOs for storage: | 1027 | 619  | 695  | 555  | 359  | 293  | 775  | 866  | 387  | 1069 |
| Reordering of NBOs for storage: | 665  | 1356 | 1013 | 641  | 355  | 792  | 915  | 1256 | 1436 | 974  |
| Reordering of NBOs for storage: | 400  | 936  | 649  | 259  | 742  | 1361 | 680  | 823  | 427  | 789  |
| Reordering of NBOs for storage: | 1251 | 793  | 570  | 1001 | 762  | 874  | 1164 | 734  | 1286 | 1094 |
| Reordering of NBOs for storage: | 958  | 1083 | 1109 | 848  | 1149 | 1281 | 1124 | 1311 | 595  | 443  |
| Reordering of NBOs for storage: | 1431 | 671  | 422  | 541  | 1236 | 1271 | 747  | 942  | 558  | 1139 |
| Reordering of NBOs for storage: | 531  | 313  | 1170 | 1130 | 441  | 352  | 304  | 1099 | 914  | 653  |
| Reordering of NBOs for storage: | 544  | 1058 | 635  | 1134 | 509  | 1056 | 804  | 1451 | 1155 | 1416 |
| Reordering of NBOs for storage: | 513  | 1306 | 1041 | 1376 | 354  | 1426 | 1411 | 1246 | 1115 | 1276 |
| Reordering of NBOs for storage: | 1231 | 622  | 574  | 1351 | 1366 | 737  | 525  | 236  | 1341 | 276  |
| Reordering of NBOs for storage: | 710  | 1241 | 629  | 1421 | 1391 | 1269 | 1301 | 336  | 901  | 275  |
| Reordering of NBOs for storage: | 713  | 1044 | 1371 | 1014 | 587  | 1449 | 1221 | 720  | 770  | 852  |
| Reordering of NBOs for storage: | 820  | 554  | 847  | 582  | 790  | 417  | 331  | 468  | 515  | 851  |
| Reordering of NBOs for storage: | 909  | 1045 | 482  | 1401 | 1216 | 288  | 1290 | 985  | 1000 | 624  |
| Reordering of NBOs for storage: | 258  | 1389 | 694  | 1396 | 552  | 929  | 1324 | 1326 | 714  | 765  |
| Reordering of NBOs for storage: | 302  | 234  | 943  | 819  | 1240 | 1299 | 229  | 1380 | 681  | 722  |
| Reordering of NBOs for storage: | 384  | 1098 | 1138 | 860  | 398  | 685  | 1370 | 330  | 447  | 934  |
| Reordering of NBOs for storage: | 524  | 1070 | 920  | 861  | 766  | 1304 | 932  | 1414 | 287  | 890  |
| Reordering of NBOs for storage: | 1381 | 1399 | 1429 | 1314 | 1249 | 1215 | 1160 | 476  | 512  | 1315 |
| Reordering of NBOs for storage: | 1420 | 1093 | 1219 | 1336 | 1133 | 803  | 1359 | 1244 | 1279 | 1289 |
| Reordering of NBOs for storage: | 1250 | 794  | 1335 | 1235 | 1285 | 1349 | 1360 | 1435 | 986  | 1055 |
| Reordering of NBOs for storage: | 1406 | 1274 | 1220 | 1430 | 1320 | 1355 | 1260 | 1305 | 1415 | 709  |
| Reordering of NBOs for storage: | 1234 | 1280 | 692  | 1104 | 1395 | 873  | 1424 | 322  | 711  | 316  |
| Reordering of NBOs for storage: | 1350 | 1245 | 1275 | 900  | 1339 | 1364 | 436  | 651  | 306  | 957  |
| Reordering of NBOs for storage: | 636  | 1425 | 1239 | 1374 | 761  | 1309 | 1229 | 1440 | 412  | 581  |
| Reordering of NBOs for storage: | 1375 | 1446 | 889  | 580  | 560  | 1409 | 277  | 1254 | 335  | 849  |
| Reordering of NBOs for storage: | 1369 | 1419 | 1259 | 1379 | 780  | 666  | 723  | 601  | 402  | 1400 |
| Reordering of NBOs for storage: | 1441 | 999  | 307  | 701  | 667  | 1346 | 568  | 805  | 1319 | 859  |
| Reordering of NBOs for storage: | 1439 | 598  | 678  | 1334 | 1386 | 1230 | 1224 | 488  | 1340 | 863  |
| Reordering of NBOs for storage: | 1295 | 904  | 627  | 959  | 428  | 621  | 791  | 1445 | 733  | 862  |
| Reordering of NBOs for storage: | 664  | 1344 | 1321 | 807  | 1365 | 566  | 1225 | 538  | 1410 | 1261 |
| Reordering of NBOs for storage: | 1266 | 1028 | 834  | 721  | 1310 | 289  | 1120 | 895  | 991  | 300  |
| Reordering of NBOs for storage: | 389  | 1450 | 928  | 1265 | 290  | 845  | 583  | 650  | 950  | 1394 |
| Reordering of NBOs for storage: | 328  | 1214 | 977  | 286  | 706  | 540  | 817  | 831  | 1385 | 1331 |
| Reordering of NBOs for storage: | 1291 | 1270 | 527  | 545  | 1255 | 363  | 764  | 668  | 1175 | 1296 |
| Reordering of NBOs for storage: | 1226 | 1195 | 776  | 652  | 1390 | 781  | 1210 | 358  | 1330 | 272  |
| Reordering of NBOs for storage: | 429  | 879  | 490  | 1300 | 514  | 1434 | 887  | 1354 | 1284 | 1144 |
| Reordering of NBOs for storage: | 274  | 614  | 1100 | 528  | 473  | 526  | 876  | 260  | 1205 | 907  |
| Reordering of NBOs for storage: | 1050 | 262  | 1145 | 906  | 806  | 596  | 1404 | 1325 | 1185 | 233  |
| Reordering of NBOs for storage: | 767  | 390  | 573  | 839  | 654  | 610  | 964  | 973  | 922  | 487  |
| Reordering of NBOs for storage: | 406  | 475  | 404  | 724  | 584  | 510  | 1405 | 597  | 1095 | 1200 |
| Reordering of NBOs for storage: | 1140 | 608  | 625  | 1135 | 1181 | 615  | 896  | 840  | 963  | 600  |
| Reordering of NBOs for storage: | 1018 | 935  | 796  | 877  | 273  | 261  | 279  | 918  | 628  | 903  |
| Reordering of NBOs for storage: | 1131 | 945  | 303  | 1190 | 1126 | 1166 | 1121 | 1116 | 684  | 1171 |
| Reordering of NBOs for storage: | 1106 | 1151 | 1156 | 1146 | 931  | 682  | 571  | 1191 | 750  | 1016 |
| Reordering of NBOs for storage: | 517  | 511  | 1111 | 586  | 736  | 1022 | 1161 | 626  | 1004 | 923  |
| Reordering of NBOs for storage: | 1119 | 784  | 1007 | 824  | 643  | 970  | 1180 | 227  | 1201 | 561  |







450288,6.200311,6.257361\C,0,9.2481,6.800409,5.015595\C,0,9.203623,6.0  
22833,3.860822\C,0,9.360772,4.630922,3.920515\C,0,9.886109,4.173946,7.  
731306\C,0,11.400522,4.134665,8.019606\C,0,9.321508,3.810342,2.637054\  
C,0,10.453718,4.217884,1.677264\C,0,8.980818,-0.865235,5.349308\C,0,8.  
65085,-1.465927,4.115458\C,0,8.153002,-2.775933,4.150465\C,0,8.015373,  
-3.461005,5.356769\C,0,8.374816,-2.84937,6.556479\C,0,8.864734,-1.5359  
57,6.582631\C,0,8.821353,-0.741541,2.785683\C,0,9.639162,-1.568589,1.7  
79623\C,0,9.278811,-0.896643,7.900628\C,0,10.507625,-1.608237,8.496084  
\C,0,4.160047,0.437224,8.643579\C,0,4.632553,1.241979,9.705388\C,0,5.0  
34067,0.588585,10.879236\C,0,4.959711,-0.79889,11.000087\C,0,4.488211,  
-1.567994,9.939755\C,0,4.07821,-0.968778,8.739525\C,0,4.661906,2.76041  
8,9.609909\C,0,3.321585,3.363032,10.076553\C,0,3.550564,-1.837,7.60523  
5\C,0,2.244878,-2.54731,8.0053\C,0,2.928977,-0.227491,3.463413\C,0,1.5  
61867,-0.558751,2.837619\C,0,3.999555,4.62567,4.731829\C,0,2.62536,5.3  
03085,4.906658\C,0,7.463605,-0.329832,2.193543\C,0,8.117188,-0.853382,  
8.903798\C,0,5.822828,3.390863,10.389551\C,0,4.604956,-2.847197,7.1259  
26\C,0,3.972863,-1.294821,3.100501\C,0,5.076233,5.674084,4.426124\C,0,  
7.950461,3.900055,1.946935\C,0,9.138022,4.861309,8.881551\H,0,11.90842  
1,2.669863,4.834326\H,0,11.589427,-0.097858,4.950044\H,0,9.04235,6.501  
83,2.892501\H,0,9.118575,7.882769,4.949531\H,0,9.471528,6.818659,7.155  
181\H,0,8.271046,-3.398742,7.494248\H,0,7.627893,-4.481841,5.361437\H,  
0,7.876196,-3.268886,3.216406\H,0,1.559362,1.046215,8.03957\H,0,1.2174  
3,2.064968,5.478429\H,0,4.43156,-2.65414,10.043472\H,0,5.273436,-1.282  
005,11.928372\H,0,5.408227,1.180361,11.715918\H,0,4.339153,4.811905,2.  
016189\H,0,4.062635,3.046701,0.302294\H,0,3.427013,0.745453,0.968206\H  
,0,3.322693,-1.177608,6.756274\H,0,4.812283,3.036271,8.555977\H,0,2.80  
29,-0.256053,4.554723\H,0,4.276453,4.166041,5.690685\H,0,9.480558,2.75  
4655,2.902624\H,0,9.516569,3.137737,7.680761\H,0,9.385503,0.183492,2.9  
76232\H,0,9.564918,0.14521,7.693472\H,0,9.2555,4.273146,9.804443\H,0,9  
.53873,5.866385,9.088517\H,0,8.068344,4.937487,8.64552\H,0,11.592985,3  
.644348,8.986373\H,0,11.957485,3.585635,7.246653\H,0,11.811315,5.15515  
6,8.070017\H,0,10.444915,3.580252,0.780294\H,0,10.340372,5.261307,1.34  
589\H,0,11.440841,4.125867,2.154089\H,0,7.938129,3.275166,1.040805\H,0  
,7.146251,3.554424,2.610258\H,0,7.721917,4.933546,1.644573\H,0,10.8292  
48,-1.105324,9.420618\H,0,10.278876,-2.65557,8.746191\H,0,11.355665,-1  
.609076,7.79502\H,0,8.429559,-0.336872,9.823925\H,0,7.257138,-0.313423  
,8.484688\H,0,7.786233,-1.863979,9.187786\H,0,9.807298,-0.986744,0.860  
965\H,0,10.619599,-1.85237,2.189577\H,0,9.115871,-2.492926,1.491393\H,  
0,7.609478,0.247324,1.267367\H,0,6.857098,-1.214117,1.946314\H,0,6.893  
218,0.290455,2.899036\H,0,3.612659,-2.293056,3.393445\H,0,4.168214,-1.  
313507,2.017104\H,0,4.923351,-1.109085,3.617417\H,0,1.218526,-1.548993  
,3.173199\H,0,0.798855,0.181604,3.119561\H,0,1.616881,-0.578774,1.7384  
59\H,0,2.681482,6.07467,5.689599\H,0,2.304995,5.788539,3.971068\H,0,1.  
846865,4.583484,5.197647\H,0,5.168167,6.359897,5.27999\H,0,6.059506,5.  
208609,4.281032\H,0,4.830822,6.276574,3.536698\H,0,5.89075,4.457956,10  
.137512\H,0,5.686232,3.31191,11.480329\H,0,6.782582,2.927638,10.121519  
\H,0,3.34773,4.458768,9.977273\H,0,2.474689,2.993582,9.480893\H,0,3.12  
8091,3.119769,11.133431\H,0,1.847866,-3.12721,7.158157\H,0,2.410054,-3  
.244769,8.840639\H,0,1.473439,-1.828189,8.317002\H,0,4.215936,-3.43300  
7,6.278687\H,0,5.520918,-2.339569,6.796047\H,0,4.875002,-3.55594,7.923  
944\Version=IA32L-G09RevB.01\State=1-A\HF=-2480.6263132\RMSD=5.486e-0  
9\Dipole=0.6824443,-1.3592304,-0.8176219\Quadrupole=5.0631638,-3.84862  
97,-1.2145342,2.50419,-2.1236516,-4.5860224\PG=C01 [X(C55H72B2N4O1)]\@

"TIGER, TIGER BURNING BRIGHT  
IN THE FOREST OF THE NIGHT.  
WHAT IMMORTAL HAND OR EYE  
CAN FRAME THY FEARFUL SYMMETRY?"

- WILLIAM BLAKE

Job cpu time: 1 days 9 hours 17 minutes 12.0 seconds.

File lengths (MBytes): RWF= 1383 Int= 0 D2E= 0 Chk= 90 Scr= 1

Normal termination of Gaussian 09 at Sun Jun 14 03:36:36 2015.
