# Supplementary material for: Exploring the reducing role of boron: added insights from theory
Source: Royal Society of Chemistry journal article supplement (doi:10.1039/c5dt03799a), 2015-11-18
Supplement: c5dt03799a2.pdf [file c5dt03799a2.pdf]

\*\*\*\*\*Gaussian NBO Version 3.1\*\*\*\*\*  
N A T U R A L A T O M I C O R B I T A L A N D  
N A T U R A L B O N D O R B I T A L A N A L Y S I S  
\*\*\*\*\*Gaussian NBO Version 3.1\*\*\*\*\*

/RESON / : Allow strongly delocalized NBO set  
/PLOT / : Write information for the orbital plotter

Analyzing the SCF density

Job title: Molden generated mol2

Storage needed: 579472 in NPA, 769865 in NBO, 578878 in NLMO ( 33551006 available)

NATURAL POPULATIONS: Natural atomic orbital occupancies

| NAO | Atom | No | lang  | Type(AO) | Occupancy | Energy    |
|-----|------|----|-------|----------|-----------|-----------|
| 1   | N    | 1  | S     | Cor( 1S) | 1.99944   | -13.87358 |
| 2   | N    | 1  | S     | Val( 2S) | 1.20026   | -0.52994  |
| 3   | N    | 1  | S     | Ryd( 3S) | 0.00145   | 1.33972   |
| 4   | N    | 1  | S     | Ryd( 4S) | 0.00016   | 2.88617   |
| 5   | N    | 1  | S     | Ryd( 5S) | 0.00000   | 30.13441  |
| 6   | N    | 1  | px    | Val( 2p) | 1.25936   | -0.24080  |
| 7   | N    | 1  | px    | Ryd( 3p) | 0.00205   | 1.11294   |
| 8   | N    | 1  | px    | Ryd( 4p) | 0.00024   | 2.40468   |
| 9   | N    | 1  | py    | Val( 2p) | 1.30911   | -0.24469  |
| 10  | N    | 1  | py    | Ryd( 3p) | 0.00323   | 1.08639   |
| 11  | N    | 1  | py    | Ryd( 4p) | 0.00027   | 2.37027   |
| 12  | N    | 1  | pz    | Val( 2p) | 1.49074   | -0.24322  |
| 13  | N    | 1  | pz    | Ryd( 3p) | 0.00247   | 0.62485   |
| 14  | N    | 1  | pz    | Ryd( 4p) | 0.00026   | 2.06920   |
| 15  | N    | 1  | dxy   | Ryd( 3d) | 0.00092   | 2.69512   |
| 16  | N    | 1  | dxz   | Ryd( 3d) | 0.00055   | 2.29593   |
| 17  | N    | 1  | dyz   | Ryd( 3d) | 0.00069   | 2.47106   |
| 18  | N    | 1  | dx2y2 | Ryd( 3d) | 0.00120   | 2.81967   |
| 19  | N    | 1  | dz2   | Ryd( 3d) | 0.00056   | 2.57384   |
| 20  | C    | 2  | S     | Cor( 1S) | 1.99878   | -9.79480  |
| 21  | C    | 2  | S     | Val( 2S) | 0.94267   | -0.19996  |
| 22  | C    | 2  | S     | Ryd( 4S) | 0.00312   | 1.38072   |
| 23  | C    | 2  | S     | Ryd( 3S) | 0.00021   | 1.22220   |
| 24  | C    | 2  | S     | Ryd( 5S) | 0.00000   | 21.37289  |
| 25  | C    | 2  | px    | Val( 2p) | 1.10405   | -0.07199  |
| 26  | C    | 2  | px    | Ryd( 4p) | 0.00597   | 1.63024   |
| 27  | C    | 2  | px    | Ryd( 3p) | 0.00084   | 1.10441   |
| 28  | C    | 2  | py    | Val( 2p) | 0.80996   | -0.04926  |
| 29  | C    | 2  | py    | Ryd( 4p) | 0.00279   | 1.32358   |
| 30  | C    | 2  | py    | Ryd( 3p) | 0.00104   | 1.20057   |
| 31  | C    | 2  | pz    | Val( 2p) | 0.91807   | -0.11113  |
| 32  | C    | 2  | pz    | Ryd( 4p) | 0.00203   | 1.00213   |
| 33  | C    | 2  | pz    | Ryd( 3p) | 0.00038   | 0.97603   |
| 34  | C    | 2  | dxy   | Ryd( 3d) | 0.00098   | 2.62001   |
| 35  | C    | 2  | dxz   | Ryd( 3d) | 0.00104   | 2.00090   |
| 36  | C    | 2  | dyz   | Ryd( 3d) | 0.00066   | 2.08899   |
| 37  | C    | 2  | dx2y2 | Ryd( 3d) | 0.00074   | 2.51982   |
| 38  | C    | 2  | dz2   | Ryd( 3d) | 0.00050   | 2.25828   |
| 39  | N    | 3  | S     | Cor( 1S) | 1.99944   | -13.87211 |
| 40  | N    | 3  | S     | Val( 2S) | 1.20362   | -0.52785  |
| 41  | N    | 3  | S     | Ryd( 3S) | 0.00127   | 1.37292   |
| 42  | N    | 3  | S     | Ryd( 4S) | 0.00017   | 2.96280   |
| 43  | N    | 3  | S     | Ryd( 5S) | 0.00000   | 30.01445  |
| 44  | N    | 3  | px    | Val( 2p) | 1.26928   | -0.23805  |
| 45  | N    | 3  | px    | Ryd( 3p) | 0.00205   | 0.91261   |
| 46  | N    | 3  | px    | Ryd( 4p) | 0.00017   | 2.43013   |
| 47  | N    | 3  | py    | Val( 2p) | 1.29911   | -0.24109  |
| 48  | N    | 3  | py    | Ryd( 3p) | 0.00331   | 1.26533   |
| 49  | N    | 3  | py    | Ryd( 4p) | 0.00032   | 2.31862   |
| 50  | N    | 3  | pz    | Val( 2p) | 1.48310   | -0.24060  |

|     |   |   |       |          |         |          |
|-----|---|---|-------|----------|---------|----------|
| 51  | N | 3 | pz    | Ryd( 3p) | 0.00240 | 0.66589  |
| 52  | N | 3 | pz    | Ryd( 4p) | 0.00026 | 2.05998  |
| 53  | N | 3 | dxz   | Ryd( 3d) | 0.00127 | 2.83524  |
| 54  | N | 3 | dxz   | Ryd( 3d) | 0.00064 | 2.30445  |
| 55  | N | 3 | dyz   | Ryd( 3d) | 0.00063 | 2.45341  |
| 56  | N | 3 | dx2y2 | Ryd( 3d) | 0.00085 | 2.69135  |
| 57  | N | 3 | dz2   | Ryd( 3d) | 0.00055 | 2.57903  |
| 58  | C | 4 | S     | Cor( 1S) | 1.99911 | -9.79234 |
| 59  | C | 4 | S     | Val( 2S) | 0.95582 | -0.23420 |
| 60  | C | 4 | S     | Ryd( 3S) | 0.00099 | 0.88767  |
| 61  | C | 4 | S     | Ryd( 4S) | 0.00007 | 1.11360  |
| 62  | C | 4 | S     | Ryd( 5S) | 0.00001 | 21.33693 |
| 63  | C | 4 | px    | Val( 2p) | 1.04669 | -0.07824 |
| 64  | C | 4 | px    | Ryd( 3p) | 0.00199 | 0.99856  |
| 65  | C | 4 | px    | Ryd( 4p) | 0.00076 | 1.54980  |
| 66  | C | 4 | py    | Val( 2p) | 1.00679 | -0.10050 |
| 67  | C | 4 | py    | Ryd( 3p) | 0.00389 | 0.81374  |
| 68  | C | 4 | py    | Ryd( 4p) | 0.00046 | 1.28279  |
| 69  | C | 4 | pz    | Val( 2p) | 1.06460 | -0.14047 |
| 70  | C | 4 | pz    | Ryd( 3p) | 0.00418 | 0.48648  |
| 71  | C | 4 | pz    | Ryd( 4p) | 0.00046 | 1.20660  |
| 72  | C | 4 | dxz   | Ryd( 3d) | 0.00088 | 2.54615  |
| 73  | C | 4 | dxz   | Ryd( 3d) | 0.00069 | 1.95250  |
| 74  | C | 4 | dyz   | Ryd( 3d) | 0.00054 | 2.07631  |
| 75  | C | 4 | dx2y2 | Ryd( 3d) | 0.00066 | 2.48141  |
| 76  | C | 4 | dz2   | Ryd( 3d) | 0.00054 | 2.22600  |
| 77  | C | 5 | S     | Cor( 1S) | 1.99911 | -9.79324 |
| 78  | C | 5 | S     | Val( 2S) | 0.95630 | -0.23513 |
| 79  | C | 5 | S     | Ryd( 3S) | 0.00099 | 0.88082  |
| 80  | C | 5 | S     | Ryd( 4S) | 0.00007 | 1.11351  |
| 81  | C | 5 | S     | Ryd( 5S) | 0.00001 | 21.33334 |
| 82  | C | 5 | px    | Val( 2p) | 0.89172 | -0.07800 |
| 83  | C | 5 | px    | Ryd( 3p) | 0.00279 | 0.80803  |
| 84  | C | 5 | px    | Ryd( 4p) | 0.00052 | 1.28648  |
| 85  | C | 5 | py    | Val( 2p) | 1.13537 | -0.10246 |
| 86  | C | 5 | py    | Ryd( 3p) | 0.00319 | 0.96559  |
| 87  | C | 5 | py    | Ryd( 4p) | 0.00069 | 1.49429  |
| 88  | C | 5 | pz    | Val( 2p) | 1.09550 | -0.14155 |
| 89  | C | 5 | pz    | Ryd( 3p) | 0.00411 | 0.51505  |
| 90  | C | 5 | pz    | Ryd( 4p) | 0.00050 | 1.24878  |
| 91  | C | 5 | dxz   | Ryd( 3d) | 0.00063 | 2.40729  |
| 92  | C | 5 | dxz   | Ryd( 3d) | 0.00078 | 1.92449  |
| 93  | C | 5 | dyz   | Ryd( 3d) | 0.00053 | 2.11552  |
| 94  | C | 5 | dx2y2 | Ryd( 3d) | 0.00089 | 2.60709  |
| 95  | C | 5 | dz2   | Ryd( 3d) | 0.00046 | 2.22657  |
| 96  | B | 6 | S     | Cor( 1S) | 1.99707 | -6.29777 |
| 97  | B | 6 | S     | Val( 2S) | 0.62756 | 0.11896  |
| 98  | B | 6 | S     | Ryd( 4S) | 0.00203 | 2.83854  |
| 99  | B | 6 | S     | Ryd( 3S) | 0.00029 | 2.63925  |
| 100 | B | 6 | S     | Ryd( 5S) | 0.00006 | 11.48960 |
| 101 | B | 6 | px    | Val( 2p) | 0.87525 | 0.12408  |
| 102 | B | 6 | px    | Ryd( 4p) | 0.00259 | 1.06997  |
| 103 | B | 6 | px    | Ryd( 3p) | 0.00089 | 1.00077  |
| 104 | B | 6 | py    | Val( 2p) | 0.91541 | 0.08334  |
| 105 | B | 6 | py    | Ryd( 4p) | 0.00120 | 0.92352  |
| 106 | B | 6 | py    | Ryd( 3p) | 0.00068 | 0.70363  |
| 107 | B | 6 | pz    | Val( 2p) | 0.77832 | 0.03607  |
| 108 | B | 6 | pz    | Ryd( 4p) | 0.00065 | 0.76662  |
| 109 | B | 6 | pz    | Ryd( 3p) | 0.00032 | 0.58062  |
| 110 | B | 6 | dxz   | Ryd( 3d) | 0.00072 | 2.00001  |
| 111 | B | 6 | dxz   | Ryd( 3d) | 0.00054 | 1.63090  |
| 112 | B | 6 | dyz   | Ryd( 3d) | 0.00037 | 1.39057  |
| 113 | B | 6 | dx2y2 | Ryd( 3d) | 0.00078 | 2.23239  |
| 114 | B | 6 | dz2   | Ryd( 3d) | 0.00033 | 1.72147  |
| 115 | C | 7 | S     | Cor( 1S) | 1.99860 | -9.72863 |
| 116 | C | 7 | S     | Val( 2S) | 0.90122 | -0.13899 |
| 117 | C | 7 | S     | Ryd( 4S) | 0.00946 | 1.42193  |

|     |   |    |       |          |         |           |
|-----|---|----|-------|----------|---------|-----------|
| 118 | C | 7  | S     | Ryd( 3S) | 0.00018 | 1.10222   |
| 119 | C | 7  | S     | Ryd( 5S) | 0.00000 | 21.44259  |
| 120 | C | 7  | px    | Val( 2p) | 1.18523 | -0.02076  |
| 121 | C | 7  | px    | Ryd( 3p) | 0.00102 | 1.00752   |
| 122 | C | 7  | px    | Ryd( 4p) | 0.00012 | 1.30872   |
| 123 | C | 7  | py    | Val( 2p) | 0.88707 | 0.00635   |
| 124 | C | 7  | py    | Ryd( 3p) | 0.01433 | 1.02692   |
| 125 | C | 7  | py    | Ryd( 4p) | 0.00027 | 1.42994   |
| 126 | C | 7  | pz    | Val( 2p) | 0.87788 | -0.04749  |
| 127 | C | 7  | pz    | Ryd( 3p) | 0.00130 | 0.70015   |
| 128 | C | 7  | pz    | Ryd( 4p) | 0.00036 | 1.30027   |
| 129 | C | 7  | dxz   | Ryd( 3d) | 0.00221 | 2.50338   |
| 130 | C | 7  | dxz   | Ryd( 3d) | 0.00022 | 1.89929   |
| 131 | C | 7  | dyz   | Ryd( 3d) | 0.00236 | 2.24656   |
| 132 | C | 7  | dx2y2 | Ryd( 3d) | 0.00127 | 2.50226   |
| 133 | C | 7  | dz2   | Ryd( 3d) | 0.00077 | 2.18972   |
| 134 | O | 8  | S     | Cor( 1S) | 1.99982 | -18.39696 |
| 135 | O | 8  | S     | Val( 2S) | 1.70220 | -0.75580  |
| 136 | O | 8  | S     | Ryd( 3S) | 0.00233 | 1.24534   |
| 137 | O | 8  | S     | Ryd( 4S) | 0.00009 | 5.42551   |
| 138 | O | 8  | S     | Ryd( 5S) | 0.00000 | 40.95942  |
| 139 | O | 8  | px    | Val( 2p) | 1.76758 | -0.14320  |
| 140 | O | 8  | px    | Ryd( 3p) | 0.00564 | 0.73503   |
| 141 | O | 8  | px    | Ryd( 4p) | 0.00003 | 2.72699   |
| 142 | O | 8  | py    | Val( 2p) | 1.55254 | -0.18884  |
| 143 | O | 8  | py    | Ryd( 3p) | 0.00213 | 0.56200   |
| 144 | O | 8  | py    | Ryd( 4p) | 0.00013 | 3.00737   |
| 145 | O | 8  | pz    | Val( 2p) | 1.55941 | -0.15273  |
| 146 | O | 8  | pz    | Ryd( 3p) | 0.00276 | 0.64972   |
| 147 | O | 8  | pz    | Ryd( 4p) | 0.00002 | 2.66997   |
| 148 | O | 8  | dxz   | Ryd( 3d) | 0.00120 | 2.92505   |
| 149 | O | 8  | dxz   | Ryd( 3d) | 0.00013 | 2.66076   |
| 150 | O | 8  | dyz   | Ryd( 3d) | 0.00142 | 2.94203   |
| 151 | O | 8  | dx2y2 | Ryd( 3d) | 0.00147 | 3.18364   |
| 152 | O | 8  | dz2   | Ryd( 3d) | 0.00059 | 2.81520   |
| 153 | C | 9  | S     | Cor( 1S) | 1.99932 | -9.78455  |
| 154 | C | 9  | S     | Val( 2S) | 1.10312 | -0.28727  |
| 155 | C | 9  | S     | Ryd( 3S) | 0.00093 | 1.01370   |
| 156 | C | 9  | S     | Ryd( 4S) | 0.00007 | 1.89936   |
| 157 | C | 9  | S     | Ryd( 5S) | 0.00000 | 21.15771  |
| 158 | C | 9  | px    | Val( 2p) | 1.28337 | -0.11787  |
| 159 | C | 9  | px    | Ryd( 3p) | 0.00176 | 0.61160   |
| 160 | C | 9  | px    | Ryd( 4p) | 0.00021 | 1.40492   |
| 161 | C | 9  | py    | Val( 2p) | 0.89042 | -0.10041  |
| 162 | C | 9  | py    | Ryd( 3p) | 0.00191 | 0.56666   |
| 163 | C | 9  | py    | Ryd( 4p) | 0.00038 | 1.27582   |
| 164 | C | 9  | pz    | Val( 2p) | 1.16548 | -0.11130  |
| 165 | C | 9  | pz    | Ryd( 3p) | 0.00108 | 0.57435   |
| 166 | C | 9  | pz    | Ryd( 4p) | 0.00018 | 1.39805   |
| 167 | C | 9  | dxz   | Ryd( 3d) | 0.00032 | 2.22967   |
| 168 | C | 9  | dxz   | Ryd( 3d) | 0.00050 | 2.29989   |
| 169 | C | 9  | dyz   | Ryd( 3d) | 0.00070 | 2.32457   |
| 170 | C | 9  | dx2y2 | Ryd( 3d) | 0.00085 | 2.52806   |
| 171 | C | 9  | dz2   | Ryd( 3d) | 0.00056 | 2.31003   |
| 172 | C | 10 | S     | Cor( 1S) | 1.99933 | -9.79463  |
| 173 | C | 10 | S     | Val( 2S) | 1.09983 | -0.29734  |
| 174 | C | 10 | S     | Ryd( 3S) | 0.00099 | 0.94776   |
| 175 | C | 10 | S     | Ryd( 4S) | 0.00008 | 1.77555   |
| 176 | C | 10 | S     | Ryd( 5S) | 0.00000 | 21.25560  |
| 177 | C | 10 | px    | Val( 2p) | 1.13468 | -0.12383  |
| 178 | C | 10 | px    | Ryd( 3p) | 0.00164 | 0.54358   |
| 179 | C | 10 | px    | Ryd( 4p) | 0.00025 | 1.34653   |
| 180 | C | 10 | py    | Val( 2p) | 1.01634 | -0.11534  |
| 181 | C | 10 | py    | Ryd( 3p) | 0.00110 | 0.51972   |
| 182 | C | 10 | py    | Ryd( 4p) | 0.00036 | 1.31496   |
| 183 | C | 10 | pz    | Val( 2p) | 1.18931 | -0.12228  |
| 184 | C | 10 | pz    | Ryd( 3p) | 0.00156 | 0.54183   |
| 185 | C | 10 | pz    | Ryd( 4p) | 0.00019 | 1.42235   |

|     |   |    |       |          |         |           |
|-----|---|----|-------|----------|---------|-----------|
| 186 | C | 10 | dxy   | Ryd( 3d) | 0.00073 | 2.45143   |
| 187 | C | 10 | dxz   | Ryd( 3d) | 0.00038 | 2.04124   |
| 188 | C | 10 | dyz   | Ryd( 3d) | 0.00069 | 2.36919   |
| 189 | C | 10 | dx2y2 | Ryd( 3d) | 0.00050 | 2.33626   |
| 190 | C | 10 | dz2   | Ryd( 3d) | 0.00068 | 2.44832   |
| 191 | B | 11 | S     | Cor( 1S) | 1.99781 | -6.30802  |
| 192 | B | 11 | S     | Val( 2S) | 0.66143 | 0.07761   |
| 193 | B | 11 | S     | Ryd( 4S) | 0.00179 | 3.26121   |
| 194 | B | 11 | S     | Ryd( 3S) | 0.00075 | 1.57863   |
| 195 | B | 11 | S     | Ryd( 5S) | 0.00012 | 6.53467   |
| 196 | B | 11 | px    | Val( 2p) | 0.84312 | 0.16035   |
| 197 | B | 11 | px    | Ryd( 3p) | 0.00270 | 0.85260   |
| 198 | B | 11 | px    | Ryd( 4p) | 0.00113 | 1.38627   |
| 199 | B | 11 | py    | Val( 2p) | 0.85959 | 0.06974   |
| 200 | B | 11 | py    | Ryd( 3p) | 0.00180 | 0.76937   |
| 201 | B | 11 | py    | Ryd( 4p) | 0.00065 | 0.97657   |
| 202 | B | 11 | pz    | Val( 2p) | 0.65279 | 0.03030   |
| 203 | B | 11 | pz    | Ryd( 3p) | 0.00124 | 0.55078   |
| 204 | B | 11 | pz    | Ryd( 4p) | 0.00049 | 0.82963   |
| 205 | B | 11 | dxy   | Ryd( 3d) | 0.00077 | 1.82350   |
| 206 | B | 11 | dxz   | Ryd( 3d) | 0.00058 | 1.66332   |
| 207 | B | 11 | dyz   | Ryd( 3d) | 0.00049 | 1.41225   |
| 208 | B | 11 | dx2y2 | Ryd( 3d) | 0.00057 | 2.19814   |
| 209 | B | 11 | dz2   | Ryd( 3d) | 0.00049 | 1.65423   |
| 210 | C | 12 | S     | Cor( 1S) | 1.99873 | -9.77950  |
| 211 | C | 12 | S     | Val( 2S) | 0.94419 | -0.19036  |
| 212 | C | 12 | S     | Ryd( 3S) | 0.00306 | 1.39680   |
| 213 | C | 12 | S     | Ryd( 4S) | 0.00064 | 1.44270   |
| 214 | C | 12 | S     | Ryd( 5S) | 0.00000 | 21.36372  |
| 215 | C | 12 | px    | Val( 2p) | 1.14550 | -0.07419  |
| 216 | C | 12 | px    | Ryd( 4p) | 0.00605 | 1.68769   |
| 217 | C | 12 | px    | Ryd( 3p) | 0.00054 | 1.11517   |
| 218 | C | 12 | py    | Val( 2p) | 0.87512 | -0.06100  |
| 219 | C | 12 | py    | Ryd( 4p) | 0.00216 | 1.18800   |
| 220 | C | 12 | py    | Ryd( 3p) | 0.00098 | 1.09447   |
| 221 | C | 12 | pz    | Val( 2p) | 0.89176 | -0.07539  |
| 222 | C | 12 | pz    | Ryd( 4p) | 0.00201 | 1.09422   |
| 223 | C | 12 | pz    | Ryd( 3p) | 0.00080 | 1.04713   |
| 224 | C | 12 | dxy   | Ryd( 3d) | 0.00115 | 2.46372   |
| 225 | C | 12 | dxz   | Ryd( 3d) | 0.00100 | 2.32973   |
| 226 | C | 12 | dyz   | Ryd( 3d) | 0.00046 | 2.40791   |
| 227 | C | 12 | dx2y2 | Ryd( 3d) | 0.00067 | 2.35414   |
| 228 | C | 12 | dz2   | Ryd( 3d) | 0.00067 | 2.03235   |
| 229 | N | 13 | S     | Cor( 1S) | 1.99946 | -13.85323 |
| 230 | N | 13 | S     | Val( 2S) | 1.19631 | -0.50907  |
| 231 | N | 13 | S     | Ryd( 3S) | 0.00149 | 1.45519   |
| 232 | N | 13 | S     | Ryd( 4S) | 0.00020 | 2.82182   |
| 233 | N | 13 | S     | Ryd( 5S) | 0.00000 | 30.11221  |
| 234 | N | 13 | px    | Val( 2p) | 1.26050 | -0.22067  |
| 235 | N | 13 | px    | Ryd( 3p) | 0.00186 | 0.95867   |
| 236 | N | 13 | px    | Ryd( 4p) | 0.00020 | 2.39314   |
| 237 | N | 13 | py    | Val( 2p) | 1.37259 | -0.22285  |
| 238 | N | 13 | py    | Ryd( 3p) | 0.00338 | 1.05770   |
| 239 | N | 13 | py    | Ryd( 4p) | 0.00034 | 2.25968   |
| 240 | N | 13 | pz    | Val( 2p) | 1.44259 | -0.22213  |
| 241 | N | 13 | pz    | Ryd( 3p) | 0.00358 | 0.87015   |
| 242 | N | 13 | pz    | Ryd( 4p) | 0.00035 | 2.18671   |
| 243 | N | 13 | dxy   | Ryd( 3d) | 0.00101 | 2.62262   |
| 244 | N | 13 | dxz   | Ryd( 3d) | 0.00079 | 2.50717   |
| 245 | N | 13 | dyz   | Ryd( 3d) | 0.00067 | 2.75487   |
| 246 | N | 13 | dx2y2 | Ryd( 3d) | 0.00074 | 2.65274   |
| 247 | N | 13 | dz2   | Ryd( 3d) | 0.00063 | 2.40066   |
| 248 | C | 14 | S     | Cor( 1S) | 1.99910 | -9.77552  |
| 249 | C | 14 | S     | Val( 2S) | 0.95276 | -0.21635  |
| 250 | C | 14 | S     | Ryd( 3S) | 0.00102 | 0.89954   |
| 251 | C | 14 | S     | Ryd( 4S) | 0.00007 | 1.09222   |
| 252 | C | 14 | S     | Ryd( 5S) | 0.00001 | 21.38179  |

|     |   |    |       |          |         |           |
|-----|---|----|-------|----------|---------|-----------|
| 253 | C | 14 | px    | Val( 2p) | 0.96572 | -0.05924  |
| 254 | C | 14 | px    | Ryd( 3p) | 0.00228 | 0.91835   |
| 255 | C | 14 | px    | Ryd( 4p) | 0.00063 | 1.46000   |
| 256 | C | 14 | py    | Val( 2p) | 1.06465 | -0.10141  |
| 257 | C | 14 | py    | Ryd( 3p) | 0.00423 | 0.71904   |
| 258 | C | 14 | py    | Ryd( 4p) | 0.00052 | 1.28583   |
| 259 | C | 14 | pz    | Val( 2p) | 1.09540 | -0.10785  |
| 260 | C | 14 | pz    | Ryd( 3p) | 0.00378 | 0.68400   |
| 261 | C | 14 | pz    | Ryd( 4p) | 0.00049 | 1.34003   |
| 262 | C | 14 | dxy   | Ryd( 3d) | 0.00074 | 2.26933   |
| 263 | C | 14 | dxz   | Ryd( 3d) | 0.00082 | 2.16828   |
| 264 | C | 14 | dyz   | Ryd( 3d) | 0.00059 | 2.43991   |
| 265 | C | 14 | dx2y2 | Ryd( 3d) | 0.00072 | 2.42302   |
| 266 | C | 14 | dz2   | Ryd( 3d) | 0.00054 | 2.07135   |
| 267 | C | 15 | S     | Cor( 1S) | 1.99910 | -9.77494  |
| 268 | C | 15 | S     | Val( 2S) | 0.95269 | -0.21708  |
| 269 | C | 15 | S     | Ryd( 3S) | 0.00100 | 0.87782   |
| 270 | C | 15 | S     | Ryd( 4S) | 0.00007 | 1.10411   |
| 271 | C | 15 | S     | Ryd( 5S) | 0.00001 | 21.37219  |
| 272 | C | 15 | px    | Val( 2p) | 0.94576 | -0.05952  |
| 273 | C | 15 | px    | Ryd( 3p) | 0.00239 | 0.87237   |
| 274 | C | 15 | px    | Ryd( 4p) | 0.00066 | 1.45127   |
| 275 | C | 15 | py    | Val( 2p) | 1.11245 | -0.10261  |
| 276 | C | 15 | py    | Ryd( 3p) | 0.00438 | 0.72644   |
| 277 | C | 15 | py    | Ryd( 4p) | 0.00060 | 1.37462   |
| 278 | C | 15 | pz    | Val( 2p) | 1.08430 | -0.10835  |
| 279 | C | 15 | pz    | Ryd( 3p) | 0.00431 | 0.63998   |
| 280 | C | 15 | pz    | Ryd( 4p) | 0.00048 | 1.34403   |
| 281 | C | 15 | dxy   | Ryd( 3d) | 0.00075 | 2.22948   |
| 282 | C | 15 | dxz   | Ryd( 3d) | 0.00073 | 2.16721   |
| 283 | C | 15 | dyz   | Ryd( 3d) | 0.00060 | 2.44948   |
| 284 | C | 15 | dx2y2 | Ryd( 3d) | 0.00069 | 2.45447   |
| 285 | C | 15 | dz2   | Ryd( 3d) | 0.00056 | 2.06636   |
| 286 | N | 16 | S     | Cor( 1S) | 1.99946 | -13.85576 |
| 287 | N | 16 | S     | Val( 2S) | 1.19633 | -0.51187  |
| 288 | N | 16 | S     | Ryd( 3S) | 0.00118 | 1.50907   |
| 289 | N | 16 | S     | Ryd( 4S) | 0.00018 | 2.71650   |
| 290 | N | 16 | S     | Ryd( 5S) | 0.00000 | 30.11678  |
| 291 | N | 16 | px    | Val( 2p) | 1.26219 | -0.22286  |
| 292 | N | 16 | px    | Ryd( 3p) | 0.00198 | 0.98426   |
| 293 | N | 16 | px    | Ryd( 4p) | 0.00019 | 2.35214   |
| 294 | N | 16 | py    | Val( 2p) | 1.39380 | -0.22542  |
| 295 | N | 16 | py    | Ryd( 3p) | 0.00321 | 0.93970   |
| 296 | N | 16 | py    | Ryd( 4p) | 0.00037 | 2.24720   |
| 297 | N | 16 | pz    | Val( 2p) | 1.42402 | -0.22452  |
| 298 | N | 16 | pz    | Ryd( 3p) | 0.00339 | 0.93423   |
| 299 | N | 16 | pz    | Ryd( 4p) | 0.00038 | 2.21135   |
| 300 | N | 16 | dxy   | Ryd( 3d) | 0.00085 | 2.56951   |
| 301 | N | 16 | dxz   | Ryd( 3d) | 0.00078 | 2.51701   |
| 302 | N | 16 | dyz   | Ryd( 3d) | 0.00067 | 2.77732   |
| 303 | N | 16 | dx2y2 | Ryd( 3d) | 0.00087 | 2.64224   |
| 304 | N | 16 | dz2   | Ryd( 3d) | 0.00063 | 2.41456   |
| 305 | C | 17 | S     | Cor( 1S) | 1.99933 | -9.77872  |
| 306 | C | 17 | S     | Val( 2S) | 1.09804 | -0.27956  |
| 307 | C | 17 | S     | Ryd( 3S) | 0.00102 | 0.97653   |
| 308 | C | 17 | S     | Ryd( 4S) | 0.00005 | 2.19158   |
| 309 | C | 17 | S     | Ryd( 5S) | 0.00000 | 20.79107  |
| 310 | C | 17 | px    | Val( 2p) | 1.21057 | -0.10684  |
| 311 | C | 17 | px    | Ryd( 3p) | 0.00153 | 0.67014   |
| 312 | C | 17 | px    | Ryd( 4p) | 0.00022 | 1.49458   |
| 313 | C | 17 | py    | Val( 2p) | 1.00761 | -0.09814  |
| 314 | C | 17 | py    | Ryd( 3p) | 0.00125 | 0.60575   |
| 315 | C | 17 | py    | Ryd( 4p) | 0.00034 | 1.31414   |
| 316 | C | 17 | pz    | Val( 2p) | 1.11574 | -0.10227  |
| 317 | C | 17 | pz    | Ryd( 3p) | 0.00122 | 0.54002   |
| 318 | C | 17 | pz    | Ryd( 4p) | 0.00024 | 1.31061   |
| 319 | C | 17 | dxy   | Ryd( 3d) | 0.00064 | 2.50816   |
| 320 | C | 17 | dxz   | Ryd( 3d) | 0.00059 | 2.35647   |

|     |   |    |       |          |         |          |
|-----|---|----|-------|----------|---------|----------|
| 321 | C | 17 | dyz   | Ryd( 3d) | 0.00072 | 2.48073  |
| 322 | C | 17 | dx2y2 | Ryd( 3d) | 0.00044 | 2.16005  |
| 323 | C | 17 | dz2   | Ryd( 3d) | 0.00063 | 2.22663  |
| 324 | C | 18 | S     | Cor( 1S) | 1.99934 | -9.78803 |
| 325 | C | 18 | S     | Val( 2S) | 1.09446 | -0.28798 |
| 326 | C | 18 | S     | Ryd( 3S) | 0.00096 | 0.91915  |
| 327 | C | 18 | S     | Ryd( 4S) | 0.00009 | 1.72200  |
| 328 | C | 18 | S     | Ryd( 5S) | 0.00000 | 21.26110 |
| 329 | C | 18 | px    | Val( 2p) | 1.20108 | -0.11828 |
| 330 | C | 18 | px    | Ryd( 3p) | 0.00160 | 0.54505  |
| 331 | C | 18 | px    | Ryd( 4p) | 0.00022 | 1.45412  |
| 332 | C | 18 | py    | Val( 2p) | 1.06769 | -0.10932 |
| 333 | C | 18 | py    | Ryd( 3p) | 0.00121 | 0.56356  |
| 334 | C | 18 | py    | Ryd( 4p) | 0.00035 | 1.42735  |
| 335 | C | 18 | pz    | Val( 2p) | 1.06509 | -0.10832 |
| 336 | C | 18 | pz    | Ryd( 3p) | 0.00126 | 0.50369  |
| 337 | C | 18 | pz    | Ryd( 4p) | 0.00030 | 1.33400  |
| 338 | C | 18 | dxz   | Ryd( 3d) | 0.00050 | 2.28218  |
| 339 | C | 18 | dxz   | Ryd( 3d) | 0.00035 | 2.19090  |
| 340 | C | 18 | dyz   | Ryd( 3d) | 0.00063 | 2.45835  |
| 341 | C | 18 | dx2y2 | Ryd( 3d) | 0.00058 | 2.36393  |
| 342 | C | 18 | dz2   | Ryd( 3d) | 0.00097 | 2.38900  |
| 343 | H | 19 | S     | Val( 1S) | 0.76643 | -0.01400 |
| 344 | H | 19 | S     | Ryd( 3S) | 0.00032 | 1.41083  |
| 345 | H | 19 | S     | Ryd( 2S) | 0.00017 | 0.86360  |
| 346 | H | 19 | px    | Ryd( 2p) | 0.00047 | 2.60775  |
| 347 | H | 19 | py    | Ryd( 2p) | 0.00023 | 1.99193  |
| 348 | H | 19 | pz    | Ryd( 2p) | 0.00026 | 1.61605  |
| 349 | H | 20 | S     | Val( 1S) | 0.76796 | -0.01622 |
| 350 | H | 20 | S     | Ryd( 2S) | 0.00046 | 0.87317  |
| 351 | H | 20 | S     | Ryd( 3S) | 0.00020 | 1.39330  |
| 352 | H | 20 | px    | Ryd( 2p) | 0.00027 | 2.14688  |
| 353 | H | 20 | py    | Ryd( 2p) | 0.00040 | 2.37019  |
| 354 | H | 20 | pz    | Ryd( 2p) | 0.00030 | 1.69280  |
| 355 | H | 21 | S     | Val( 1S) | 0.77074 | -0.00043 |
| 356 | H | 21 | S     | Ryd( 3S) | 0.00035 | 1.27082  |
| 357 | H | 21 | S     | Ryd( 2S) | 0.00017 | 1.02631  |
| 358 | H | 21 | px    | Ryd( 2p) | 0.00040 | 2.42632  |
| 359 | H | 21 | py    | Ryd( 2p) | 0.00028 | 1.91206  |
| 360 | H | 21 | pz    | Ryd( 2p) | 0.00032 | 1.92450  |
| 361 | H | 22 | S     | Val( 1S) | 0.77106 | -0.00125 |
| 362 | H | 22 | S     | Ryd( 3S) | 0.00033 | 1.36636  |
| 363 | H | 22 | S     | Ryd( 2S) | 0.00017 | 0.92068  |
| 364 | H | 22 | px    | Ryd( 2p) | 0.00038 | 2.37129  |
| 365 | H | 22 | py    | Ryd( 2p) | 0.00033 | 2.01806  |
| 366 | H | 22 | pz    | Ryd( 2p) | 0.00030 | 1.86808  |
| 367 | H | 23 | S     | Val( 1S) | 0.78704 | -0.00481 |
| 368 | H | 23 | S     | Ryd( 2S) | 0.00045 | 0.63272  |
| 369 | H | 23 | S     | Ryd( 3S) | 0.00013 | 1.76491  |
| 370 | H | 23 | px    | Ryd( 2p) | 0.00031 | 2.30024  |
| 371 | H | 23 | py    | Ryd( 2p) | 0.00032 | 2.03701  |
| 372 | H | 23 | pz    | Ryd( 2p) | 0.00018 | 1.81299  |
| 373 | H | 24 | S     | Val( 1S) | 0.79078 | 0.00113  |
| 374 | H | 24 | S     | Ryd( 2S) | 0.00125 | 0.66030  |
| 375 | H | 24 | S     | Ryd( 3S) | 0.00015 | 1.77590  |
| 376 | H | 24 | px    | Ryd( 2p) | 0.00018 | 1.95053  |
| 377 | H | 24 | py    | Ryd( 2p) | 0.00028 | 1.81789  |
| 378 | H | 24 | pz    | Ryd( 2p) | 0.00032 | 2.43565  |
| 379 | H | 25 | S     | Val( 1S) | 0.73307 | 0.03867  |
| 380 | H | 25 | S     | Ryd( 2S) | 0.00178 | 0.76647  |
| 381 | H | 25 | S     | Ryd( 3S) | 0.00025 | 1.87911  |
| 382 | H | 25 | px    | Ryd( 2p) | 0.00030 | 2.19501  |
| 383 | H | 25 | py    | Ryd( 2p) | 0.00025 | 2.02520  |

|     |   |    |    |          |         |          |
|-----|---|----|----|----------|---------|----------|
| 384 | H | 25 | pz | Ryd( 2p) | 0.00029 | 2.01868  |
| 385 | H | 26 | S  | Val( 1S) | 0.79029 | -0.01397 |
| 386 | H | 26 | S  | Ryd( 2S) | 0.00078 | 0.61008  |
| 387 | H | 26 | S  | Ryd( 3S) | 0.00014 | 1.76150  |
| 388 | H | 26 | px | Ryd( 2p) | 0.00022 | 1.91092  |
| 389 | H | 26 | py | Ryd( 2p) | 0.00041 | 2.39681  |
| 390 | H | 26 | pz | Ryd( 2p) | 0.00017 | 1.80170  |
| 391 | H | 27 | S  | Val( 1S) | 0.78639 | -0.00490 |
| 392 | H | 27 | S  | Ryd( 2S) | 0.00123 | 0.64435  |
| 393 | H | 27 | S  | Ryd( 3S) | 0.00014 | 1.75944  |
| 394 | H | 27 | px | Ryd( 2p) | 0.00017 | 1.78962  |
| 395 | H | 27 | py | Ryd( 2p) | 0.00027 | 1.85645  |
| 396 | H | 27 | pz | Ryd( 2p) | 0.00033 | 2.51143  |
| 397 | H | 28 | S  | Val( 1S) | 0.75302 | 0.01225  |
| 398 | H | 28 | S  | Ryd( 2S) | 0.00078 | 1.08639  |
| 399 | H | 28 | S  | Ryd( 3S) | 0.00015 | 1.63479  |
| 400 | H | 28 | px | Ryd( 2p) | 0.00040 | 2.59581  |
| 401 | H | 28 | py | Ryd( 2p) | 0.00019 | 1.76913  |
| 402 | H | 28 | pz | Ryd( 2p) | 0.00017 | 1.81987  |
| 403 | H | 29 | S  | Val( 1S) | 0.78634 | -0.01911 |
| 404 | H | 29 | S  | Ryd( 2S) | 0.00070 | 0.66884  |
| 405 | H | 29 | S  | Ryd( 3S) | 0.00013 | 1.69434  |
| 406 | H | 29 | px | Ryd( 2p) | 0.00020 | 1.73161  |
| 407 | H | 29 | py | Ryd( 2p) | 0.00020 | 1.85282  |
| 408 | H | 29 | pz | Ryd( 2p) | 0.00038 | 2.52032  |
| 409 | H | 30 | S  | Val( 1S) | 0.72573 | 0.02502  |
| 410 | H | 30 | S  | Ryd( 2S) | 0.00066 | 1.17417  |
| 411 | H | 30 | S  | Ryd( 3S) | 0.00018 | 1.73633  |
| 412 | H | 30 | px | Ryd( 2p) | 0.00033 | 2.58558  |
| 413 | H | 30 | py | Ryd( 2p) | 0.00028 | 1.87647  |
| 414 | H | 30 | pz | Ryd( 2p) | 0.00013 | 1.76125  |
| 415 | H | 31 | S  | Val( 1S) | 0.78821 | -0.01980 |
| 416 | H | 31 | S  | Ryd( 2S) | 0.00078 | 0.64618  |
| 417 | H | 31 | S  | Ryd( 3S) | 0.00013 | 1.71632  |
| 418 | H | 31 | px | Ryd( 2p) | 0.00021 | 1.73965  |
| 419 | H | 31 | py | Ryd( 2p) | 0.00033 | 2.29308  |
| 420 | H | 31 | pz | Ryd( 2p) | 0.00026 | 2.07297  |
| 421 | H | 32 | S  | Val( 1S) | 0.78674 | -0.00967 |
| 422 | H | 32 | S  | Ryd( 2S) | 0.00056 | 0.70064  |
| 423 | H | 32 | S  | Ryd( 3S) | 0.00014 | 1.68526  |
| 424 | H | 32 | px | Ryd( 2p) | 0.00019 | 1.94107  |
| 425 | H | 32 | py | Ryd( 2p) | 0.00033 | 2.07337  |
| 426 | H | 32 | pz | Ryd( 2p) | 0.00028 | 2.13053  |
| 427 | H | 33 | S  | Val( 1S) | 0.78690 | -0.00921 |
| 428 | H | 33 | S  | Ryd( 2S) | 0.00062 | 0.71236  |
| 429 | H | 33 | S  | Ryd( 3S) | 0.00014 | 1.68188  |
| 430 | H | 33 | px | Ryd( 2p) | 0.00020 | 1.97033  |
| 431 | H | 33 | py | Ryd( 2p) | 0.00025 | 1.75269  |
| 432 | H | 33 | pz | Ryd( 2p) | 0.00035 | 2.42243  |
| 433 | H | 34 | S  | Val( 1S) | 0.70985 | 0.05033  |
| 434 | H | 34 | S  | Ryd( 2S) | 0.00205 | 0.87294  |
| 435 | H | 34 | S  | Ryd( 3S) | 0.00030 | 1.91652  |
| 436 | H | 34 | px | Ryd( 2p) | 0.00050 | 2.59304  |
| 437 | H | 34 | py | Ryd( 2p) | 0.00026 | 1.89430  |
| 438 | H | 34 | pz | Ryd( 2p) | 0.00011 | 1.78731  |

WARNING: 1 low occupancy (<1.9990e) core orbital found on C 2  
1 low occupancy (<1.9990e) core orbital found on B 6  
1 low occupancy (<1.9990e) core orbital found on C 7  
1 low occupancy (<1.9990e) core orbital found on B 11  
1 low occupancy (<1.9990e) core orbital found on C 12

WARNING: Population inversion found on atom C 2  
 Population inversion found on atom B 6  
 Population inversion found on atom C 7  
 Population inversion found on atom B 11  
 Population inversion found on atom C 12  
 Population inversion found on atom H 19  
 Population inversion found on atom H 21  
 Population inversion found on atom H 22

Summary of Natural Population Analysis:

| Atom      | No | Natural Charge | Natural Population |          |         |           |
|-----------|----|----------------|--------------------|----------|---------|-----------|
|           |    |                | Core               | Valence  | Rydberg | Total     |
| N         | 1  | -0.27296       | 1.99944            | 5.25947  | 0.01404 | 7.27296   |
| C         | 2  | 0.20616        | 1.99878            | 3.77475  | 0.02030 | 5.79384   |
| N         | 3  | -0.26843       | 1.99944            | 5.25511  | 0.01388 | 7.26843   |
| C         | 4  | -0.08914       | 1.99911            | 4.07390  | 0.01612 | 6.08914   |
| C         | 5  | -0.09415       | 1.99911            | 4.07888  | 0.01616 | 6.09415   |
| B         | 6  | -0.20507       | 1.99707            | 3.19654  | 0.01146 | 5.20507   |
| C         | 7  | 0.11614        | 1.99860            | 3.85140  | 0.03386 | 5.88386   |
| O         | 8  | -0.59949       | 1.99982            | 6.58172  | 0.01794 | 8.59949   |
| C         | 9  | -0.45114       | 1.99932            | 4.44239  | 0.00943 | 6.45114   |
| C         | 10 | -0.44866       | 1.99933            | 4.44016  | 0.00916 | 6.44866   |
| B         | 11 | -0.02830       | 1.99781            | 3.01693  | 0.01356 | 5.02830   |
| C         | 12 | 0.12451        | 1.99873            | 3.85657  | 0.02019 | 5.87549   |
| N         | 13 | -0.28669       | 1.99946            | 5.27199  | 0.01525 | 7.28669   |
| C         | 14 | -0.09407       | 1.99910            | 4.07854  | 0.01643 | 6.09407   |
| C         | 15 | -0.11152       | 1.99910            | 4.09520  | 0.01722 | 6.11152   |
| N         | 16 | -0.29049       | 1.99946            | 5.27635  | 0.01468 | 7.29049   |
| C         | 17 | -0.44018       | 1.99933            | 4.43196  | 0.00889 | 6.44018   |
| C         | 18 | -0.43670       | 1.99934            | 4.42832  | 0.00903 | 6.43670   |
| H         | 19 | 0.23212        | 0.00000            | 0.76643  | 0.00145 | 0.76788   |
| H         | 20 | 0.23041        | 0.00000            | 0.76796  | 0.00164 | 0.76959   |
| H         | 21 | 0.22773        | 0.00000            | 0.77074  | 0.00152 | 0.77227   |
| H         | 22 | 0.22744        | 0.00000            | 0.77106  | 0.00150 | 0.77256   |
| H         | 23 | 0.21156        | 0.00000            | 0.78704  | 0.00139 | 0.78844   |
| H         | 24 | 0.20702        | 0.00000            | 0.79078  | 0.00220 | 0.79298   |
| H         | 25 | 0.26406        | 0.00000            | 0.73307  | 0.00287 | 0.73594   |
| H         | 26 | 0.20799        | 0.00000            | 0.79029  | 0.00172 | 0.79201   |
| H         | 27 | 0.21148        | 0.00000            | 0.78639  | 0.00213 | 0.78852   |
| H         | 28 | 0.24529        | 0.00000            | 0.75302  | 0.00169 | 0.75471   |
| H         | 29 | 0.21205        | 0.00000            | 0.78634  | 0.00161 | 0.78795   |
| H         | 30 | 0.27269        | 0.00000            | 0.72573  | 0.00158 | 0.72731   |
| H         | 31 | 0.21008        | 0.00000            | 0.78821  | 0.00171 | 0.78992   |
| H         | 32 | 0.21176        | 0.00000            | 0.78674  | 0.00149 | 0.78824   |
| H         | 33 | 0.21155        | 0.00000            | 0.78690  | 0.00155 | 0.78845   |
| H         | 34 | 0.28694        | 0.00000            | 0.70985  | 0.00321 | 0.71306   |
| * Total * |    | 0.00000        | 35.98237           | 91.71072 | 0.30691 | 128.00000 |

| Natural Population    |                              |
|-----------------------|------------------------------|
| Core                  | 35.98237 ( 99.9510% of 36)   |
| Valence               | 91.71072 ( 99.6856% of 92)   |
| Natural Minimal Basis | 127.69309 ( 99.7602% of 128) |
| Natural Rydberg Basis | 0.30691 ( 0.2398% of 128)    |

| Atom | No | Natural Electron Configuration                      |
|------|----|-----------------------------------------------------|
| N    | 1  | [core]2S( 1.20)2p( 4.06)3p( 0.01)                   |
| C    | 2  | [core]2S( 0.94)2p( 2.83)4p( 0.01)                   |
| N    | 3  | [core]2S( 1.20)2p( 4.05)3p( 0.01)                   |
| C    | 4  | [core]2S( 0.96)2p( 3.12)3p( 0.01)                   |
| C    | 5  | [core]2S( 0.96)2p( 3.12)3p( 0.01)                   |
| B    | 6  | [core]2S( 0.63)2p( 2.57)                            |
| C    | 7  | [core]2S( 0.90)2p( 2.95)3p( 0.02)4S( 0.01)3d( 0.01) |
| O    | 8  | [core]2S( 1.70)2p( 4.88)3p( 0.01)                   |



```

C   9   [core]2S( 1.10)2p( 3.34)
C  10   [core]2S( 1.10)2p( 3.34)
B  11   [core]2S( 0.66)2p( 2.36)3p( 0.01)
C  12   [core]2S( 0.94)2p( 2.91)4p( 0.01)
N  13   [core]2S( 1.20)2p( 4.08)3p( 0.01)
C  14   [core]2S( 0.95)2p( 3.13)3p( 0.01)
C  15   [core]2S( 0.95)2p( 3.14)3p( 0.01)
N  16   [core]2S( 1.20)2p( 4.08)3p( 0.01)
C  17   [core]2S( 1.10)2p( 3.33)
C  18   [core]2S( 1.09)2p( 3.33)
H  19   1S( 0.77)
H  20   1S( 0.77)
H  21   1S( 0.77)
H  22   1S( 0.77)
H  23   1S( 0.79)
H  24   1S( 0.79)
H  25   1S( 0.73)
H  26   1S( 0.79)
H  27   1S( 0.79)
H  28   1S( 0.75)
H  29   1S( 0.79)
H  30   1S( 0.73)
H  31   1S( 0.79)
H  32   1S( 0.79)
H  33   1S( 0.79)
H  34   1S( 0.71)

```

NATURAL BOND ORBITAL ANALYSIS:

| Cycle | Occ.<br>Thresh. | Occupancies |           | Lewis Structure |    |    |    | Low<br>occ<br>(L) | High<br>occ<br>(NL) | Dev  |
|-------|-----------------|-------------|-----------|-----------------|----|----|----|-------------------|---------------------|------|
|       |                 | Lewis       | Non-Lewis | CR              | BD | 3C | LP |                   |                     |      |
| 1(1)  | 1.90            | 121.40551   | 6.59449   | 18              | 37 | 0  | 9  | 9                 | 9                   | 1.25 |
| 2(2)  | 1.90            | 121.40551   | 6.59449   | 18              | 37 | 0  | 9  | 9                 | 9                   | 1.25 |
| 3(1)  | 1.80            | 122.76499   | 5.23501   | 18              | 43 | 0  | 3  | 4                 | 7                   | 0.92 |
| 4(2)  | 1.80            | 122.76499   | 5.23501   | 18              | 43 | 0  | 3  | 4                 | 7                   | 0.92 |
| 5(1)  | 1.70            | 123.46656   | 4.53344   | 18              | 42 | 0  | 4  | 3                 | 7                   | 0.62 |
| 6(2)  | 1.70            | 123.92151   | 4.07849   | 18              | 41 | 0  | 5  | 3                 | 7                   | 0.25 |
| 7(3)  | 1.70            | 123.92151   | 4.07849   | 18              | 41 | 0  | 5  | 3                 | 7                   | 0.25 |
| 8(1)  | 1.60            | 122.19793   | 5.80207   | 18              | 43 | 0  | 3  | 4                 | 10                  | 0.25 |
| 9(2)  | 1.60            | 122.74581   | 5.25419   | 18              | 42 | 0  | 4  | 4                 | 9                   | 0.25 |
| 10(3) | 1.60            | 122.74581   | 5.25419   | 18              | 42 | 0  | 4  | 4                 | 9                   | 0.25 |
| 11(1) | 1.50            | 123.09997   | 4.90003   | 18              | 38 | 0  | 8  | 1                 | 7                   | 0.58 |
| 12(2) | 1.50            | 123.09997   | 4.90003   | 18              | 38 | 0  | 8  | 1                 | 7                   | 0.58 |
| 13(1) | 1.70            | 123.92151   | 4.07849   | 18              | 41 | 0  | 5  | 3                 | 7                   | 0.25 |

Structure accepted: RESONANCE keyword permits strongly delocalized structure

```

WARNING:  1 low occupancy (<1.9990e) core orbital found on C   2
          1 low occupancy (<1.9990e) core orbital found on B   6
          1 low occupancy (<1.9990e) core orbital found on C   7
          1 low occupancy (<1.9990e) core orbital found on B  11
          1 low occupancy (<1.9990e) core orbital found on C  12

```

```

-----
Core                35.98238 ( 99.951% of 36)
Valence Lewis      87.93913 ( 95.586% of 92)
=====
Total Lewis        123.92151 ( 96.814% of 128)
-----
Valence non-Lewis   3.86264 (  3.018% of 128)
Rydberg non-Lewis   0.21585 (  0.169% of 128)
=====
Total non-Lewis     4.07849 (  3.186% of 128)
-----

```

(Occupancy) Bond orbital/ Coefficients/ Hybrids

```

-----
1. (1.98001) BD ( 1) N   1 - C   2
   ( 62.41%)  0.7900* N   1 s( 34.50%)p 1.90( 65.45%)d 0.00(  0.06%)
                                     -0.0001  0.5873  0.0058 -0.0055  0.0001
                                     -0.3369  0.0120  0.0004  0.6846  0.0052
                                     -0.0072 -0.2686 -0.0014  0.0024 -0.0102
                                     0.0042 -0.0135 -0.0133 -0.0098
   ( 37.59%)  0.6131* C   2 s( 26.95%)p 2.71( 72.97%)d 0.00(  0.07%)
                                     -0.0003  0.5185  0.0253  0.0003  0.0001
                                     0.2518 -0.0114 -0.0011 -0.7624 -0.0194
                                     -0.0172  0.2903  0.0065  0.0062 -0.0184
                                     0.0071 -0.0123 -0.0110 -0.0093

2. (1.98425) BD ( 1) N   1 - C   5
   ( 61.73%)  0.7857* N   1 s( 32.56%)p 2.07( 67.39%)d 0.00(  0.05%)
                                     0.0000  0.5706 -0.0027  0.0014  0.0000
                                     0.8154 -0.0015 -0.0034 -0.0606  0.0166
                                     -0.0099  0.0703 -0.0060  0.0033  0.0033
                                     0.0013  0.0000  0.0200 -0.0116
   ( 38.27%)  0.6187* C   5 s( 28.77%)p 2.47( 71.15%)d 0.00(  0.08%)
                                     -0.0001  0.5362  0.0119 -0.0034 -0.0010
                                     -0.8370 -0.0353  0.0069 -0.0916 -0.0221
                                     -0.0122 -0.0224  0.0056  0.0048 -0.0028
                                     0.0044 -0.0017  0.0233 -0.0155

3. (1.99022) BD ( 1) N   1 - C  10
   ( 62.61%)  0.7913* N   1 s( 32.89%)p 2.04( 67.08%)d 0.00(  0.02%)
                                     -0.0001  0.5735 -0.0077  0.0034 -0.0001
                                     -0.4666 -0.0020  0.0083 -0.6411  0.0001
                                     0.0020  0.2048 -0.0002 -0.0004  0.0126
                                     -0.0040 -0.0051 -0.0024 -0.0066
   ( 37.39%)  0.6115* C  10 s( 24.82%)p 3.03( 75.10%)d 0.00(  0.08%)
                                     0.0001  0.4975  0.0259 -0.0006 -0.0002
                                     0.5328  0.0212 -0.0041  0.6492  0.0194
                                     -0.0050 -0.2117 -0.0063  0.0016  0.0219
                                     -0.0072 -0.0091 -0.0050 -0.0114

4. (1.98001) BD ( 1) C   2 - N   3
   ( 37.65%)  0.6136* C   2 s( 26.62%)p 2.75( 73.30%)d 0.00(  0.07%)
                                     0.0003 -0.5154 -0.0240 -0.0016 -0.0001
                                     -0.6675 -0.0040 -0.0086 -0.5164 -0.0223
                                     -0.0138  0.1415  0.0075  0.0042 -0.0193
                                     0.0049  0.0025 -0.0130  0.0131
   ( 62.35%)  0.7896* N   3 s( 34.61%)p 1.89( 65.33%)d 0.00(  0.06%)
                                     0.0001 -0.5883 -0.0057  0.0047 -0.0001
                                     0.6902 -0.0070 -0.0039  0.4080  0.0117
                                     -0.0060 -0.1012 -0.0043  0.0020 -0.0187
                                     0.0047  0.0055 -0.0048  0.0127

5. (1.85099) BD ( 2) C   2 - N   3
   ( 26.76%)  0.5173* C   2 s(  0.00%)p 1.00( 99.85%)d 0.00(  0.15%)
                                     0.0000  0.0030  0.0004  0.0003  0.0000
                                     -0.0648 -0.0029  0.0008  0.3377  0.0114
                                     -0.0036  0.9375  0.0328 -0.0101  0.0118
                                     0.0347  0.0113 -0.0068 -0.0037
   ( 73.24%)  0.8558* N   3 s(  0.00%)p 1.00( 99.98%)d 0.00(  0.02%)
                                     0.0000  0.0017  0.0000 -0.0002  0.0000
                                     -0.0624  0.0000 -0.0005  0.3408 -0.0002
                                     0.0031  0.9379 -0.0006  0.0085 -0.0014
                                     -0.0063 -0.0102  0.0046  0.0065

6. (1.96108) BD ( 1) C   2 - B   6
   ( 65.58%)  0.8098* C   2 s( 46.47%)p 1.15( 53.53%)d 0.00(  0.00%)
                                     0.0000 -0.6815  0.0174  0.0024  0.0000
                                     0.6960 -0.0350 -0.0114 -0.1881  0.0105
                                     0.0033  0.1179 -0.0043 -0.0030  0.0024
                                     -0.0023  0.0016 -0.0038  0.0039
   ( 34.42%)  0.5866* B   6 s( 36.56%)p 1.73( 63.40%)d 0.00(  0.04%)
                                     0.0011 -0.6046 -0.0014  0.0031 -0.0022
                                     -0.7492 -0.0073 -0.0129  0.2380  0.0031
                                     0.0041 -0.1257 -0.0028 -0.0026  0.0083
                                     -0.0050  0.0020 -0.0145  0.0110

7. (1.98403) BD ( 1) N   3 - C   4
   ( 61.60%)  0.7848* N   3 s( 32.32%)p 2.09( 67.62%)d 0.00(  0.06%)
                                     0.0000  0.5685 -0.0034  0.0008  0.0000
                                     0.7202 -0.0118  0.0028 -0.3551 -0.0133

```

|     |           |           |               |                 |                |         |         |         |         |
|-----|-----------|-----------|---------------|-----------------|----------------|---------|---------|---------|---------|
|     |           |           |               |                 | 0.0101         | 0.1759  | 0.0041  | -0.0034 | -0.0181 |
|     |           |           |               |                 | 0.0080         | -0.0060 | 0.0059  | -0.0096 |         |
|     | ( 38.40%) | 0.6197* C | 4 s( 28.88%)  | p 2.46( 71.03%) | d 0.00( 0.08%) |         |         |         |         |
|     |           |           |               |                 | -0.0001        | 0.5373  | 0.0119  | -0.0033 | -0.0010 |
|     |           |           |               |                 | -0.6505        | -0.0162 | 0.0129  | 0.4883  | 0.0359  |
|     |           |           |               |                 | 0.0068         | -0.2164 | -0.0138 | -0.0014 | -0.0177 |
|     |           |           |               |                 | 0.0090         | -0.0060 | 0.0137  | -0.0140 |         |
| 8.  | (1.98983) | BD ( 1) N | 3 - C         | 9               |                |         |         |         |         |
|     | ( 63.04%) | 0.7940* N | 3 s( 33.01%)  | p 2.03( 66.97%) | d 0.00( 0.02%) |         |         |         |         |
|     |           |           |               |                 | -0.0001        | 0.5745  | -0.0066 | 0.0033  | -0.0001 |
|     |           |           |               |                 | -0.0059        | -0.0007 | 0.0051  | 0.7686  | 0.0021  |
|     |           |           |               |                 | -0.0056        | -0.2807 | -0.0008 | 0.0024  | -0.0013 |
|     |           |           |               |                 | 0.0005         | -0.0087 | -0.0114 | -0.0050 |         |
|     | ( 36.96%) | 0.6079* C | 9 s( 24.53%)  | p 3.07( 75.40%) | d 0.00( 0.08%) |         |         |         |         |
|     |           |           |               |                 | 0.0001         | 0.4945  | 0.0269  | -0.0013 | -0.0002 |
|     |           |           |               |                 | 0.0376         | 0.0061  | -0.0014 | -0.8133 | -0.0289 |
|     |           |           |               |                 | 0.0069         | 0.3002  | 0.0110  | -0.0024 | -0.0020 |
|     |           |           |               |                 | 0.0007         | -0.0155 | -0.0210 | -0.0088 |         |
| 9.  | (1.97894) | BD ( 1) C | 4 - C         | 5               |                |         |         |         |         |
|     | ( 49.96%) | 0.7069* C | 4 s( 37.00%)  | p 1.70( 62.93%) | d 0.00( 0.06%) |         |         |         |         |
|     |           |           |               |                 | 0.0001         | -0.6083 | -0.0065 | -0.0006 | -0.0001 |
|     |           |           |               |                 | 0.1378         | -0.0167 | -0.0206 | 0.7380  | 0.0273  |
|     |           |           |               |                 | -0.0041        | -0.2532 | -0.0109 | 0.0002  | -0.0155 |
|     |           |           |               |                 | 0.0047         | 0.0112  | 0.0108  | 0.0114  |         |
|     | ( 50.04%) | 0.7074* C | 5 s( 37.07%)  | p 1.70( 62.87%) | d 0.00( 0.06%) |         |         |         |         |
|     |           |           |               |                 | 0.0001         | -0.6088 | -0.0062 | -0.0007 | -0.0001 |
|     |           |           |               |                 | -0.3192        | -0.0301 | -0.0151 | -0.6882 | -0.0153 |
|     |           |           |               |                 | 0.0137         | 0.2272  | 0.0034  | -0.0058 | -0.0052 |
|     |           |           |               |                 | 0.0015         | 0.0141  | 0.0173  | 0.0104  |         |
| 10. | (1.87415) | BD ( 2) C | 4 - C         | 5               |                |         |         |         |         |
|     | ( 49.80%) | 0.7057* C | 4 s( 0.00%)   | p 1.00( 99.96%) | d 0.00( 0.04%) |         |         |         |         |
|     |           |           |               |                 | 0.0000         | 0.0005  | 0.0005  | -0.0001 | 0.0000  |
|     |           |           |               |                 | -0.0612        | 0.0022  | -0.0011 | 0.3341  | -0.0125 |
|     |           |           |               |                 | 0.0060         | 0.9394  | -0.0352 | 0.0168  | -0.0028 |
|     |           |           |               |                 | -0.0109        | -0.0128 | 0.0059  | 0.0078  |         |
|     | ( 50.20%) | 0.7085* C | 5 s( 0.00%)   | p 1.00( 99.96%) | d 0.00( 0.04%) |         |         |         |         |
|     |           |           |               |                 | 0.0000         | 0.0011  | 0.0004  | 0.0000  | 0.0000  |
|     |           |           |               |                 | -0.0613        | 0.0023  | -0.0011 | 0.3372  | -0.0127 |
|     |           |           |               |                 | 0.0060         | 0.9383  | -0.0357 | 0.0169  | -0.0013 |
|     |           |           |               |                 | 0.0000         | 0.0150  | -0.0061 | -0.0108 |         |
| 11. | (1.98232) | BD ( 1) C | 4 - H         | 19              |                |         |         |         |         |
|     | ( 61.69%) | 0.7854* C | 4 s( 34.06%)  | p 1.94( 65.92%) | d 0.00( 0.02%) |         |         |         |         |
|     |           |           |               |                 | -0.0003        | 0.5835  | -0.0105 | 0.0013  | 0.0006  |
|     |           |           |               |                 | 0.7432         | -0.0076 | -0.0056 | 0.3198  | -0.0086 |
|     |           |           |               |                 | -0.0075        | -0.0656 | 0.0026  | 0.0023  | 0.0102  |
|     |           |           |               |                 | -0.0024        | -0.0001 | 0.0078  | -0.0058 |         |
|     | ( 38.31%) | 0.6190* H | 19 s( 99.94%) | p 0.00( 0.06%)  |                |         |         |         |         |
|     |           |           |               |                 | 0.9997         | 0.0015  | 0.0002  | -0.0229 | -0.0095 |
|     |           |           |               |                 | 0.0019         |         |         |         |         |
| 12. | (1.98252) | BD ( 1) C | 5 - H         | 20              |                |         |         |         |         |
|     | ( 61.63%) | 0.7851* C | 5 s( 34.12%)  | p 1.93( 65.86%) | d 0.00( 0.02%) |         |         |         |         |
|     |           |           |               |                 | 0.0003         | -0.5840 | 0.0103  | -0.0014 | -0.0006 |
|     |           |           |               |                 | -0.4361        | 0.0005  | 0.0005  | 0.6346  | -0.0109 |
|     |           |           |               |                 | -0.0091        | -0.2559 | 0.0039  | 0.0033  | 0.0105  |
|     |           |           |               |                 | -0.0040        | 0.0058  | 0.0055  | 0.0037  |         |
|     | ( 38.37%) | 0.6194* H | 20 s( 99.94%) | p 0.00( 0.06%)  |                |         |         |         |         |
|     |           |           |               |                 | -0.9997        | -0.0017 | -0.0006 | 0.0139  | -0.0192 |
|     |           |           |               |                 | 0.0078         |         |         |         |         |
| 13. | (1.89970) | BD ( 1) B | 6 - C         | 7               |                |         |         |         |         |
|     | ( 40.18%) | 0.6339* B | 6 s( 28.33%)  | p 2.53( 71.61%) | d 0.00( 0.06%) |         |         |         |         |
|     |           |           |               |                 | -0.0009        | 0.5323  | -0.0027 | 0.0037  | -0.0007 |
|     |           |           |               |                 | -0.1303        | 0.0092  | -0.0041 | 0.7668  | 0.0056  |
|     |           |           |               |                 | 0.0098         | -0.3330 | -0.0004 | -0.0053 | -0.0139 |
|     |           |           |               |                 | 0.0060         | -0.0092 | -0.0087 | -0.0141 |         |
|     | ( 59.82%) | 0.7734* C | 7 s( 39.27%)  | p 1.55( 60.71%) | d 0.00( 0.02%) |         |         |         |         |
|     |           |           |               |                 | -0.0002        | 0.6254  | -0.0385 | 0.0021  | -0.0004 |
|     |           |           |               |                 | 0.6986         | 0.0031  | -0.0002 | -0.3441 | -0.0064 |
|     |           |           |               |                 | 0.0066         | 0.0222  | -0.0012 | -0.0024 | -0.0125 |
|     |           |           |               |                 | 0.0040         | -0.0029 | -0.0026 | -0.0065 |         |
| 14. | (1.82653) | BD ( 1) B | 6 - B         | 11              |                |         |         |         |         |
|     | ( 49.91%) | 0.7065* B | 6 s( 34.70%)  | p 1.88( 65.28%) | d 0.00( 0.03%) |         |         |         |         |

|     |           |         |   |        |            |                 |                |         |         |
|-----|-----------|---------|---|--------|------------|-----------------|----------------|---------|---------|
|     |           |         |   |        | -0.0005    | -0.5890         | -0.0067        | 0.0007  | 0.0009  |
|     |           |         |   |        | 0.6430     | -0.0077         | -0.0119        | 0.4816  | -0.0043 |
|     |           |         |   |        | 0.0048     | -0.0839         | -0.0015        | -0.0012 | 0.0000  |
|     |           |         |   |        | 0.0010     | 0.0022          | -0.0143        | 0.0064  |         |
|     | ( 50.09%) | 0.7077* | B | 11     | s( 40.21%) | p 1.49( 59.76%) | d 0.00( 0.02%) |         |         |
|     |           |         |   |        | -0.0001    | -0.6341         | 0.0031         | -0.0001 | 0.0006  |
|     |           |         |   |        | -0.6572    | -0.0120         | 0.0145         | 0.4042  | -0.0202 |
|     |           |         |   |        | 0.0056     | -0.0380         | 0.0075         | -0.0049 | -0.0067 |
|     |           |         |   |        | 0.0049     | -0.0006         | -0.0112        | 0.0051  |         |
| 15. | (1.99656) | BD ( 1) | C | 7 - O  | 8          |                 |                |         |         |
|     | ( 35.73%) | 0.5978* | C | 7      | s( 33.83%) | p 1.95( 66.08%) | d 0.00( 0.09%) |         |         |
|     |           |         |   |        | -0.0003    | 0.5766          | 0.0766         | 0.0013  | 0.0010  |
|     |           |         |   |        | -0.1172    | 0.0090          | -0.0016        | 0.7975  | -0.0521 |
|     |           |         |   |        | 0.0063     | -0.0894         | 0.0159         | 0.0007  | -0.0083 |
|     |           |         |   |        | 0.0009     | -0.0059         | -0.0251        | -0.0134 |         |
|     | ( 64.27%) | 0.8017* | O | 8      | s( 38.87%) | p 1.57( 61.00%) | d 0.00( 0.13%) |         |         |
|     |           |         |   |        | 0.0000     | 0.6232          | -0.0183        | 0.0046  | 0.0001  |
|     |           |         |   |        | 0.1123     | -0.0038         | -0.0007        | -0.7057 | 0.0322  |
|     |           |         |   |        | -0.0020    | 0.3132          | -0.0101        | -0.0007 | -0.0087 |
|     |           |         |   |        | 0.0032     | -0.0179         | -0.0275        | -0.0117 |         |
| 16. | (1.98543) | BD ( 2) | C | 7 - O  | 8          |                 |                |         |         |
|     | ( 28.21%) | 0.5311* | C | 7      | s( 0.61%)  | p99.99( 99.15%) | d 0.39( 0.24%) |         |         |
|     |           |         |   |        | 0.0002     | -0.0764         | -0.0157        | 0.0039  | 0.0002  |
|     |           |         |   |        | 0.1280     | -0.0021         | -0.0009        | 0.1848  | 0.0124  |
|     |           |         |   |        | 0.0030     | 0.9698          | -0.0008        | 0.0184  | 0.0041  |
|     |           |         |   |        | -0.0102    | 0.0424          | -0.0111        | -0.0181 |         |
|     | ( 71.79%) | 0.8473* | O | 8      | s( 0.47%)  | p99.99( 99.43%) | d 0.21( 0.10%) |         |         |
|     |           |         |   |        | 0.0000     | -0.0682         | 0.0041         | 0.0001  | -0.0001 |
|     |           |         |   |        | 0.1246     | -0.0031         | -0.0006        | 0.3669  | -0.0092 |
|     |           |         |   |        | 0.0000     | 0.9187          | -0.0127        | -0.0021 | -0.0016 |
|     |           |         |   |        | 0.0051     | -0.0243         | 0.0123         | 0.0149  |         |
| 17. | (1.74346) | BD ( 1) | C | 7 - B  | 11         |                 |                |         |         |
|     | ( 59.19%) | 0.7693* | C | 7      | s( 26.79%) | p 2.73( 73.18%) | d 0.00( 0.03%) |         |         |
|     |           |         |   |        | -0.0001    | -0.5172         | 0.0213         | 0.0033  | 0.0001  |
|     |           |         |   |        | 0.6932     | 0.0041          | -0.0008        | 0.4508  | 0.0179  |
|     |           |         |   |        | -0.0065    | -0.2180         | -0.0102        | 0.0006  | -0.0120 |
|     |           |         |   |        | 0.0049     | 0.0065          | 0.0048         | 0.0070  |         |
|     | ( 40.81%) | 0.6388* | B | 11     | s( 20.12%) | p 3.97( 79.83%) | d 0.00( 0.05%) |         |         |
|     |           |         |   |        | 0.0038     | -0.4483         | 0.0134         | -0.0038 | 0.0044  |
|     |           |         |   |        | -0.0996    | 0.0058          | 0.0066         | -0.8375 | 0.0007  |
|     |           |         |   |        | -0.0084    | 0.2944          | -0.0018        | 0.0122  | -0.0082 |
|     |           |         |   |        | 0.0000     | 0.0101          | 0.0095         | 0.0166  |         |
| 18. | (1.98423) | BD ( 1) | C | 9 - H  | 32         |                 |                |         |         |
|     | ( 60.68%) | 0.7790* | C | 9      | s( 24.29%) | p 3.12( 75.67%) | d 0.00( 0.04%) |         |         |
|     |           |         |   |        | -0.0001    | 0.4928          | -0.0065        | 0.0019  | 0.0002  |
|     |           |         |   |        | 0.3921     | -0.0096         | 0.0009         | 0.5272  | 0.0065  |
|     |           |         |   |        | 0.0061     | 0.5699          | -0.0066        | 0.0011  | 0.0090  |
|     |           |         |   |        | 0.0117     | 0.0131          | -0.0010        | 0.0053  |         |
|     | ( 39.32%) | 0.6271* | H | 32     | s( 99.95%) | p 0.00( 0.05%)  |                |         |         |
|     |           |         |   |        | 0.9998     | 0.0020          | 0.0002         | -0.0078 | -0.0144 |
|     |           |         |   |        | -0.0142    |                 |                |         |         |
| 19. | (1.98400) | BD ( 1) | C | 9 - H  | 33         |                 |                |         |         |
|     | ( 60.69%) | 0.7791* | C | 9      | s( 24.33%) | p 3.11( 75.63%) | d 0.00( 0.04%) |         |         |
|     |           |         |   |        | -0.0001    | 0.4932          | -0.0065        | 0.0019  | 0.0001  |
|     |           |         |   |        | 0.4265     | -0.0101         | 0.0016         | 0.0395  | 0.0090  |
|     |           |         |   |        | 0.0040     | -0.7567         | 0.0001         | -0.0045 | -0.0005 |
|     |           |         |   |        | -0.0156    | 0.0016          | 0.0045         | 0.0124  |         |
|     | ( 39.31%) | 0.6269* | H | 33     | s( 99.95%) | p 0.00( 0.05%)  |                |         |         |
|     |           |         |   |        | 0.9998     | 0.0022          | 0.0002         | -0.0088 | -0.0018 |
|     |           |         |   |        | 0.0197     |                 |                |         |         |
| 20. | (1.98391) | BD ( 1) | C | 9 - H  | 34         |                 |                |         |         |
|     | ( 64.48%) | 0.8030* | C | 9      | s( 26.91%) | p 2.71( 73.04%) | d 0.00( 0.04%) |         |         |
|     |           |         |   |        | 0.0001     | -0.5187         | 0.0035         | 0.0026  | 0.0001  |
|     |           |         |   |        | 0.8137     | -0.0120         | -0.0068        | -0.2375 | -0.0028 |
|     |           |         |   |        | -0.0079    | 0.1082          | 0.0009         | 0.0024  | 0.0058  |
|     |           |         |   |        | -0.0029    | -0.0007         | -0.0176        | 0.0092  |         |
|     | ( 35.52%) | 0.5960* | H | 34     | s( 99.94%) | p 0.00( 0.06%)  |                |         |         |
|     |           |         |   |        | -0.9997    | -0.0021         | -0.0003        | -0.0240 | 0.0049  |
|     |           |         |   |        | -0.0025    |                 |                |         |         |
| 21. | (1.98512) | BD ( 1) | C | 10 - H | 29         |                 |                |         |         |
|     | ( 60.74%) | 0.7794* | C | 10     | s( 24.52%) | p 3.08( 75.44%) | d 0.00( 0.04%) |         |         |

|     |           |         |             |            |                 |                |         |         |
|-----|-----------|---------|-------------|------------|-----------------|----------------|---------|---------|
|     |           |         |             | -0.0001    | 0.4951          | -0.0079        | 0.0020  | 0.0001  |
|     |           |         |             | 0.1481     | -0.0110         | -0.0034        | -0.2313 | -0.0025 |
|     |           |         |             | -0.0033    | 0.8239          | -0.0061        | 0.0053  | -0.0017 |
|     |           |         |             | 0.0078     | -0.0069         | 0.0003         | 0.0176  |         |
|     | ( 39.26%) | 0.6266* | H 29        | s( 99.95%) | p 0.00( 0.05%)  |                |         |         |
|     |           |         |             | 0.9998     | 0.0023          | 0.0002         | -0.0019 | 0.0051  |
|     |           |         |             | -0.0208    |                 |                |         |         |
| 22. | (1.98351) | BD ( 1) | C 10 - H 30 |            |                 |                |         |         |
|     | ( 63.78%) | 0.7987* | C 10        | s( 26.23%) | p 2.81( 73.73%) | d 0.00( 0.04%) |         |         |
|     |           |         |             | 0.0001     | -0.5122         | 0.0007         | 0.0036  | 0.0000  |
|     |           |         |             | 0.8167     | -0.0038         | -0.0028        | -0.2486 | 0.0085  |
|     |           |         |             | 0.0090     | 0.0910          | -0.0035        | -0.0032 | 0.0135  |
|     |           |         |             | -0.0046    | 0.0017          | -0.0116        | 0.0090  |         |
|     | ( 36.22%) | 0.6018* | H 30        | s( 99.95%) | p 0.00( 0.05%)  |                |         |         |
|     |           |         |             | -0.9997    | -0.0018         | -0.0009        | -0.0197 | 0.0099  |
|     |           |         |             | -0.0035    |                 |                |         |         |
| 23. | (1.98503) | BD ( 1) | C 10 - H 31 |            |                 |                |         |         |
|     | ( 60.68%) | 0.7789* | C 10        | s( 24.49%) | p 3.08( 75.47%) | d 0.00( 0.04%) |         |         |
|     |           |         |             | 0.0001     | -0.4948         | 0.0080         | -0.0023 | -0.0001 |
|     |           |         |             | -0.1611    | 0.0106          | 0.0028         | 0.6791  | -0.0016 |
|     |           |         |             | 0.0061     | 0.5170          | -0.0059        | 0.0022  | 0.0066  |
|     |           |         |             | 0.0053     | -0.0165         | 0.0087         | -0.0022 |         |
|     | ( 39.32%) | 0.6271* | H 31        | s( 99.95%) | p 0.00( 0.05%)  |                |         |         |
|     |           |         |             | -0.9998    | -0.0025         | -0.0002        | 0.0026  | -0.0166 |
|     |           |         |             | -0.0135    |                 |                |         |         |
| 24. | (1.96884) | BD ( 1) | B 11 - C 12 |            |                 |                |         |         |
|     | ( 33.88%) | 0.5820* | B 11        | s( 39.46%) | p 1.53( 60.49%) | d 0.00( 0.05%) |         |         |
|     |           |         |             | -0.0003    | 0.6281          | 0.0102         | 0.0017  | 0.0042  |
|     |           |         |             | -0.7398    | -0.0165         | -0.0138        | -0.2056 | -0.0036 |
|     |           |         |             | -0.0051    | 0.1214          | 0.0024         | 0.0037  | 0.0073  |
|     |           |         |             | -0.0053    | -0.0003         | 0.0182         | -0.0114 |         |
|     | ( 66.12%) | 0.8132* | C 12        | s( 46.47%) | p 1.15( 53.52%) | d 0.00( 0.01%) |         |         |
|     |           |         |             | -0.0001    | 0.6815          | -0.0161        | -0.0066 | 0.0000  |
|     |           |         |             | 0.7231     | -0.0379         | -0.0074        | 0.0878  | -0.0059 |
|     |           |         |             | -0.0017    | -0.0551         | 0.0012         | 0.0018  | 0.0033  |
|     |           |         |             | -0.0028    | 0.0032          | 0.0061         | -0.0035 |         |
| 25. | (1.97811) | BD ( 1) | C 12 - N 13 |            |                 |                |         |         |
|     | ( 38.05%) | 0.6169* | C 12        | s( 26.73%) | p 2.74( 73.20%) | d 0.00( 0.07%) |         |         |
|     |           |         |             | -0.0003    | 0.5165          | 0.0208         | 0.0058  | 0.0000  |
|     |           |         |             | -0.5084    | -0.0003         | -0.0015        | 0.4869  | 0.0186  |
|     |           |         |             | 0.0113     | 0.4854          | 0.0159         | 0.0101  | -0.0160 |
|     |           |         |             | -0.0159    | 0.0125          | 0.0070         | -0.0045 |         |
|     | ( 61.95%) | 0.7871* | N 13        | s( 33.66%) | p 1.97( 66.28%) | d 0.00( 0.06%) |         |         |
|     |           |         |             | -0.0001    | 0.5801          | 0.0063         | -0.0066 | 0.0001  |
|     |           |         |             | 0.5611     | -0.0101         | -0.0040        | -0.4027 | -0.0046 |
|     |           |         |             | 0.0071     | -0.4308         | -0.0053        | 0.0061  | -0.0129 |
|     |           |         |             | -0.0132    | 0.0154          | 0.0019         | -0.0019 |         |
| 26. | (1.84802) | BD ( 2) | C 12 - N 13 |            |                 |                |         |         |
|     | ( 25.65%) | 0.5065* | C 12        | s( 0.00%)  | p 1.00( 99.85%) | d 0.00( 0.15%) |         |         |
|     |           |         |             | 0.0002     | 0.0054          | 0.0016         | -0.0014 | 0.0002  |
|     |           |         |             | 0.1298     | 0.0100          | -0.0060        | -0.6309 | -0.0207 |
|     |           |         |             | 0.0037     | 0.7632          | 0.0244         | -0.0060 | 0.0221  |
|     |           |         |             | -0.0215    | 0.0008          | 0.0040         | 0.0222  |         |
|     | ( 74.35%) | 0.8622* | N 13        | s( 0.00%)  | p 1.00( 99.98%) | d 0.00( 0.02%) |         |         |
|     |           |         |             | 0.0000     | 0.0002          | 0.0003         | -0.0006 | 0.0000  |
|     |           |         |             | 0.1266     | 0.0000          | 0.0013         | -0.6367 | -0.0008 |
|     |           |         |             | -0.0058    | 0.7605          | 0.0015         | 0.0076  | -0.0031 |
|     |           |         |             | 0.0008     | -0.0024         | -0.0054        | -0.0111 |         |
| 27. | (1.97905) | BD ( 1) | C 12 - N 16 |            |                 |                |         |         |
|     | ( 37.97%) | 0.6162* | C 12        | s( 26.81%) | p 2.73( 73.12%) | d 0.00( 0.07%) |         |         |
|     |           |         |             | -0.0003    | 0.5173          | 0.0219         | 0.0066  | 0.0000  |
|     |           |         |             | -0.4467    | 0.0046          | 0.0000         | -0.5953 | -0.0188 |
|     |           |         |             | -0.0125    | -0.4200         | -0.0148        | -0.0098 | 0.0190  |
|     |           |         |             | 0.0123     | 0.0133          | 0.0021         | -0.0057 |         |
|     | ( 62.03%) | 0.7876* | N 16        | s( 34.05%) | p 1.93( 65.89%) | d 0.00( 0.06%) |         |         |
|     |           |         |             | -0.0001    | 0.5835          | 0.0069         | -0.0062 | 0.0001  |
|     |           |         |             | 0.5204     | -0.0104         | -0.0035        | 0.4826  | 0.0041  |
|     |           |         |             | -0.0078    | 0.3936          | 0.0047         | -0.0059 | 0.0147  |
|     |           |         |             | 0.0090     | 0.0157          | -0.0021        | -0.0041 |         |
| 28. | (1.98342) | BD ( 1) | N 13 - C 14 |            |                 |                |         |         |
|     | ( 61.68%) | 0.7854* | N 13        | s( 33.09%) | p 2.02( 66.86%) | d 0.00( 0.05%) |         |         |

|     |           |         |             |                                         |         |         |         |         |         |
|-----|-----------|---------|-------------|-----------------------------------------|---------|---------|---------|---------|---------|
|     |           |         |             |                                         | 0.0000  | 0.5752  | -0.0018 | 0.0024  | 0.0000  |
|     |           |         |             |                                         | -0.7870 | 0.0084  | -0.0006 | -0.2153 | -0.0120 |
|     |           |         |             |                                         | 0.0088  | -0.0494 | -0.0103 | 0.0075  | 0.0135  |
|     |           |         |             |                                         | 0.0060  | 0.0029  | 0.0138  | -0.0108 |         |
|     | ( 38.32%) | 0.6190* | C 14        | s( 28.77%)p 2.47( 71.16%)d 0.00( 0.08%) | -0.0001 | 0.5362  | 0.0110  | -0.0027 | -0.0012 |
|     |           |         |             |                                         | 0.7622  | 0.0259  | -0.0105 | 0.3142  | 0.0267  |
|     |           |         |             |                                         | 0.0075  | 0.1729  | 0.0196  | 0.0076  | 0.0113  |
|     |           |         |             |                                         | 0.0037  | 0.0033  | 0.0211  | -0.0138 |         |
| 29. | (1.99041) | BD ( 1) | N 13 - C 17 |                                         |         |         |         |         |         |
|     | ( 62.43%) | 0.7901* | N 13        | s( 33.19%)p 2.01( 66.78%)d 0.00( 0.03%) | -0.0001 | 0.5761  | -0.0086 | 0.0034  | -0.0001 |
|     |           |         |             |                                         | 0.2210  | 0.0029  | -0.0073 | 0.6210  | -0.0012 |
|     |           |         |             |                                         | -0.0036 | 0.4830  | -0.0016 | -0.0017 | 0.0068  |
|     |           |         |             |                                         | 0.0053  | 0.0124  | -0.0057 | -0.0002 |         |
|     | ( 37.57%) | 0.6130* | C 17        | s( 25.24%)p 2.96( 74.68%)d 0.00( 0.08%) | 0.0001  | 0.5017  | 0.0265  | -0.0018 | -0.0002 |
|     |           |         |             |                                         | -0.2565 | -0.0124 | 0.0008  | -0.6701 | -0.0221 |
|     |           |         |             |                                         | 0.0059  | -0.4807 | -0.0142 | 0.0034  | 0.0108  |
|     |           |         |             |                                         | 0.0081  | 0.0206  | -0.0124 | -0.0013 |         |
| 30. | (1.97858) | BD ( 1) | C 14 - C 15 |                                         |         |         |         |         |         |
|     | ( 50.01%) | 0.7072* | C 14        | s( 37.28%)p 1.68( 62.65%)d 0.00( 0.06%) | 0.0001  | -0.6106 | -0.0066 | -0.0007 | -0.0002 |
|     |           |         |             |                                         | 0.0647  | 0.0234  | 0.0183  | 0.5996  | 0.0203  |
|     |           |         |             |                                         | -0.0056 | 0.5111  | 0.0148  | -0.0073 | 0.0052  |
|     |           |         |             |                                         | 0.0055  | -0.0222 | 0.0090  | -0.0028 |         |
|     | ( 49.99%) | 0.7070* | C 15        | s( 37.32%)p 1.68( 62.62%)d 0.00( 0.06%) | 0.0001  | -0.6109 | -0.0068 | -0.0009 | -0.0002 |
|     |           |         |             |                                         | 0.1179  | 0.0243  | 0.0185  | -0.5701 | -0.0177 |
|     |           |         |             |                                         | 0.0084  | -0.5344 | -0.0181 | 0.0052  | -0.0040 |
|     |           |         |             |                                         | -0.0031 | -0.0225 | 0.0099  | -0.0024 |         |
| 31. | (1.90232) | BD ( 2) | C 14 - C 15 |                                         |         |         |         |         |         |
|     | ( 49.43%) | 0.7031* | C 14        | s( 0.00%)p 1.00( 99.96%)d 0.00( 0.04%)  | 0.0001  | -0.0061 | -0.0024 | 0.0005  | 0.0000  |
|     |           |         |             |                                         | 0.1047  | -0.0040 | 0.0018  | -0.6546 | 0.0253  |
|     |           |         |             |                                         | -0.0113 | 0.7473  | -0.0275 | 0.0128  | -0.0048 |
|     |           |         |             |                                         | 0.0029  | -0.0017 | -0.0081 | -0.0168 |         |
|     | ( 50.57%) | 0.7111* | C 15        | s( 0.00%)p 1.00( 99.96%)d 0.00( 0.04%)  | -0.0001 | -0.0047 | 0.0000  | 0.0000  | 0.0000  |
|     |           |         |             |                                         | 0.0960  | -0.0030 | 0.0017  | -0.6666 | 0.0266  |
|     |           |         |             |                                         | -0.0116 | 0.7377  | -0.0293 | 0.0116  | -0.0013 |
|     |           |         |             |                                         | 0.0045  | 0.0021  | 0.0099  | 0.0155  |         |
| 32. | (1.98166) | BD ( 1) | C 14 - H 21 |                                         |         |         |         |         |         |
|     | ( 61.46%) | 0.7839* | C 14        | s( 33.90%)p 1.95( 66.08%)d 0.00( 0.02%) | 0.0003  | -0.5821 | 0.0101  | -0.0007 | -0.0007 |
|     |           |         |             |                                         | 0.6336  | -0.0044 | -0.0036 | -0.3330 | 0.0072  |
|     |           |         |             |                                         | 0.0063  | -0.3851 | 0.0075  | 0.0057  | 0.0092  |
|     |           |         |             |                                         | 0.0098  | -0.0040 | -0.0042 | 0.0012  |         |
|     | ( 38.54%) | 0.6208* | H 21        | s( 99.94%)p 0.00( 0.06%)                | -0.9997 | -0.0016 | -0.0003 | -0.0200 | 0.0097  |
|     |           |         |             |                                         | 0.0116  |         |         |         |         |
| 33. | (1.98310) | BD ( 1) | C 15 - N 16 |                                         |         |         |         |         |         |
|     | ( 38.27%) | 0.6186* | C 15        | s( 28.57%)p 2.50( 71.35%)d 0.00( 0.08%) | -0.0001 | 0.5344  | 0.0113  | -0.0031 | -0.0011 |
|     |           |         |             |                                         | 0.7864  | 0.0298  | -0.0094 | -0.1705 | -0.0216 |
|     |           |         |             |                                         | -0.0099 | -0.2529 | -0.0214 | -0.0066 | -0.0029 |
|     |           |         |             |                                         | -0.0086 | 0.0030  | 0.0232  | -0.0129 |         |
|     | ( 61.73%) | 0.7857* | N 16        | s( 32.78%)p 2.05( 67.17%)d 0.00( 0.05%) | 0.0000  | 0.5725  | -0.0007 | 0.0023  | 0.0000  |
|     |           |         |             |                                         | -0.8040 | 0.0076  | 0.0005  | 0.0538  | 0.0115  |
|     |           |         |             |                                         | -0.0085 | 0.1484  | 0.0097  | -0.0079 | -0.0073 |
|     |           |         |             |                                         | -0.0094 | 0.0027  | 0.0170  | -0.0094 |         |
| 34. | (1.98163) | BD ( 1) | C 15 - H 22 |                                         |         |         |         |         |         |
|     | ( 61.44%) | 0.7838* | C 15        | s( 34.05%)p 1.94( 65.93%)d 0.00( 0.02%) | -0.0003 | 0.5835  | -0.0104 | 0.0008  | 0.0006  |
|     |           |         |             |                                         | -0.5964 | 0.0022  | 0.0033  | -0.4467 | 0.0077  |
|     |           |         |             |                                         | 0.0070  | -0.3223 | 0.0059  | 0.0064  | 0.0106  |
|     |           |         |             |                                         | 0.0079  | 0.0048  | 0.0017  | -0.0030 |         |
|     | ( 38.56%) | 0.6210* | H 22        | s( 99.94%)p 0.00( 0.06%)                | 0.9997  | 0.0016  | 0.0002  | 0.0189  | 0.0130  |
|     |           |         |             |                                         | 0.0100  |         |         |         |         |

35. (1.99096) BD ( 1) N 16 - C 18  
( 62.04%) 0.7877\* N 16 s( 33.11%)p 2.02( 66.86%)d 0.00( 0.03%)  
-0.0001 0.5754 -0.0098 0.0031 -0.0001  
0.2725 0.0013 -0.0074 -0.5435 0.0018  
0.0018 -0.5466 0.0023 0.0035 -0.0061  
-0.0076 0.0127 -0.0027 0.0040  
( 37.96%) 0.6161\* C 18 s( 25.65%)p 2.90( 74.28%)d 0.00( 0.08%)  
0.0001 0.5058 0.0261 0.0000 -0.0002  
-0.3175 -0.0135 0.0015 0.5550 0.0159  
-0.0039 0.5772 0.0192 -0.0026 -0.0107  
-0.0114 0.0210 -0.0066 0.0052

36. (1.98684) BD ( 1) C 17 - H 23  
( 60.57%) 0.7783\* C 17 s( 24.24%)p 3.12( 75.72%)d 0.00( 0.04%)  
-0.0001 0.4923 -0.0047 0.0026 0.0003  
-0.6870 0.0103 0.0034 0.5038 0.0053  
0.0053 0.1769 0.0015 0.0028 -0.0148  
-0.0041 0.0029 0.0085 -0.0095  
( 39.43%) 0.6279\* H 23 s( 99.95%)p 0.00( 0.05%)  
0.9997 0.0013 0.0002 0.0166 -0.0150  
-0.0043

37. (1.98534) BD ( 1) C 17 - H 24  
( 60.75%) 0.7794\* C 17 s( 24.62%)p 3.06( 75.34%)d 0.00( 0.04%)  
-0.0001 0.4962 -0.0058 0.0008 -0.0001  
0.3335 0.0059 -0.0038 -0.2921 0.0094  
0.0018 0.7460 -0.0047 0.0078 -0.0070  
0.0104 -0.0114 0.0003 0.0117  
( 39.25%) 0.6265\* H 24 s( 99.96%)p 0.00( 0.04%)  
0.9998 0.0043 0.0002 -0.0090 0.0071  
-0.0175

38. (1.98070) BD ( 1) C 17 - H 25  
( 63.33%) 0.7958\* C 17 s( 25.95%)p 2.85( 74.01%)d 0.00( 0.05%)  
-0.0001 0.5093 -0.0061 -0.0020 -0.0001  
0.5918 -0.0041 -0.0068 0.4582 -0.0033  
0.0104 -0.4238 0.0109 0.0024 0.0098  
-0.0149 -0.0107 0.0043 -0.0020  
( 36.67%) 0.6056\* H 25 s( 99.94%)p 0.00( 0.06%)  
0.9997 0.0030 0.0000 -0.0167 -0.0106  
0.0136

39. (1.98702) BD ( 1) C 18 - H 26  
( 60.55%) 0.7782\* C 18 s( 24.44%)p 3.09( 75.52%)d 0.00( 0.04%)  
0.0001 -0.4943 0.0072 -0.0030 -0.0003  
0.4176 -0.0090 -0.0040 0.7589 -0.0017  
0.0054 -0.0680 0.0063 0.0016 -0.0152  
0.0026 0.0045 0.0072 0.0100  
( 39.45%) 0.6281\* H 26 s( 99.95%)p 0.00( 0.05%)  
-0.9997 -0.0023 -0.0003 -0.0094 -0.0201  
0.0019

40. (1.98581) BD ( 1) C 18 - H 27  
( 60.96%) 0.7808\* C 18 s( 24.84%)p 3.02( 75.12%)d 0.00( 0.04%)  
0.0001 -0.4983 0.0079 -0.0012 0.0002  
0.1120 -0.0097 0.0015 -0.3145 0.0080  
0.0013 0.7997 -0.0051 0.0072 0.0010  
-0.0047 0.0132 0.0022 -0.0147  
( 39.04%) 0.6248\* H 27 s( 99.96%)p 0.00( 0.04%)  
-0.9998 -0.0041 -0.0003 -0.0016 0.0085  
-0.0188

41. (1.98196) BD ( 1) C 18 - H 28  
( 62.37%) 0.7898\* C 18 s( 25.14%)p 2.98( 74.82%)d 0.00( 0.04%)  
-0.0001 0.5013 -0.0018 -0.0040 0.0000  
0.8434 -0.0038 -0.0055 -0.1246 -0.0002  
-0.0091 0.1451 -0.0099 -0.0029 -0.0016  
0.0090 -0.0014 0.0159 -0.0098  
( 37.63%) 0.6134\* H 28 s( 99.95%)p 0.00( 0.05%)  
0.9998 0.0029 0.0002 -0.0216 0.0005  
-0.0041

42. (1.99944) CR ( 1) N 1  
s(100.00%)  
1.0000 0.0001 0.0000 0.0000 0.0000  
-0.0001 0.0000 0.0000 0.0000 0.0000  
0.0000 0.0000 0.0000 0.0000 0.0000  
0.0000 0.0000 0.0000 0.0000

43. (1.99879) CR ( 1) C 2  
s(100.00%)p 0.00( 0.00%)

|     |           |           |    |                          |         |        |         |        |        |
|-----|-----------|-----------|----|--------------------------|---------|--------|---------|--------|--------|
|     |           |           |    | 1.0000                   | 0.0003  | 0.0000 | 0.0000  | 0.0000 | 0.0000 |
|     |           |           |    | 0.0003                   | 0.0000  | 0.0000 | 0.0000  | 0.0000 | 0.0000 |
|     |           |           |    | 0.0000                   | 0.0001  | 0.0000 | 0.0000  | 0.0000 | 0.0000 |
|     |           |           |    | 0.0000                   | 0.0000  | 0.0000 | 0.0000  | 0.0000 | 0.0000 |
| 44. | (1.99944) | CR ( 1) N | 3  | s(100.00%)               |         |        |         |        |        |
|     |           |           |    | 1.0000                   | 0.0001  | 0.0000 | 0.0000  | 0.0000 | 0.0000 |
|     |           |           |    | 0.0000                   | 0.0000  | 0.0000 | 0.0000  | 0.0001 | 0.0000 |
|     |           |           |    | 0.0000                   | 0.0000  | 0.0000 | 0.0000  | 0.0000 | 0.0000 |
|     |           |           |    | 0.0000                   | 0.0000  | 0.0000 | 0.0000  | 0.0000 | 0.0000 |
| 45. | (1.99912) | CR ( 1) C | 4  | s(100.00%)p 0.00( 0.00%) |         |        |         |        |        |
|     |           |           |    | 1.0000                   | 0.0003  | 0.0000 | 0.0000  | 0.0000 | 0.0000 |
|     |           |           |    | 0.0001                   | 0.0000  | 0.0000 | 0.0000  | 0.0001 | 0.0000 |
|     |           |           |    | 0.0000                   | 0.0000  | 0.0000 | 0.0000  | 0.0000 | 0.0000 |
|     |           |           |    | 0.0000                   | 0.0000  | 0.0000 | 0.0000  | 0.0000 | 0.0000 |
| 46. | (1.99911) | CR ( 1) C | 5  | s(100.00%)p 0.00( 0.00%) |         |        |         |        |        |
|     |           |           |    | 1.0000                   | 0.0003  | 0.0000 | 0.0000  | 0.0000 | 0.0000 |
|     |           |           |    | 0.0001                   | 0.0000  | 0.0000 | -0.0002 | 0.0000 | 0.0000 |
|     |           |           |    | 0.0000                   | 0.0001  | 0.0000 | 0.0000  | 0.0000 | 0.0000 |
|     |           |           |    | 0.0000                   | 0.0000  | 0.0000 | 0.0000  | 0.0000 | 0.0000 |
| 47. | (1.99710) | CR ( 1) B | 6  | s(100.00%)p 0.00( 0.00%) |         |        |         |        |        |
|     |           |           |    | 1.0000                   | 0.0009  | 0.0000 | 0.0000  | 0.0000 | 0.0000 |
|     |           |           |    | 0.0011                   | 0.0000  | 0.0000 | 0.0007  | 0.0000 | 0.0000 |
|     |           |           |    | 0.0000                   | -0.0002 | 0.0000 | 0.0000  | 0.0000 | 0.0000 |
|     |           |           |    | 0.0000                   | 0.0000  | 0.0000 | 0.0000  | 0.0000 | 0.0000 |
| 48. | (1.99861) | CR ( 1) C | 7  | s(100.00%)p 0.00( 0.00%) |         |        |         |        |        |
|     |           |           |    | 1.0000                   | 0.0002  | 0.0000 | 0.0000  | 0.0000 | 0.0000 |
|     |           |           |    | 0.0001                   | 0.0000  | 0.0000 | 0.0002  | 0.0000 | 0.0000 |
|     |           |           |    | 0.0000                   | -0.0002 | 0.0000 | 0.0000  | 0.0000 | 0.0000 |
|     |           |           |    | 0.0000                   | 0.0000  | 0.0000 | 0.0000  | 0.0000 | 0.0000 |
| 49. | (1.99982) | CR ( 1) O | 8  | s(100.00%)p 0.00( 0.00%) |         |        |         |        |        |
|     |           |           |    | 1.0000                   | 0.0003  | 0.0000 | 0.0000  | 0.0000 | 0.0000 |
|     |           |           |    | -0.0001                  | 0.0000  | 0.0000 | 0.0000  | 0.0002 | 0.0000 |
|     |           |           |    | 0.0000                   | -0.0001 | 0.0000 | 0.0000  | 0.0000 | 0.0000 |
|     |           |           |    | 0.0000                   | 0.0000  | 0.0000 | 0.0000  | 0.0000 | 0.0000 |
| 50. | (1.99931) | CR ( 1) C | 9  | s(100.00%)p 0.00( 0.00%) |         |        |         |        |        |
|     |           |           |    | 1.0000                   | 0.0001  | 0.0000 | 0.0000  | 0.0000 | 0.0000 |
|     |           |           |    | 0.0001                   | 0.0000  | 0.0000 | 0.0002  | 0.0000 | 0.0000 |
|     |           |           |    | 0.0000                   | -0.0001 | 0.0000 | 0.0000  | 0.0000 | 0.0000 |
|     |           |           |    | 0.0000                   | 0.0000  | 0.0000 | 0.0000  | 0.0000 | 0.0000 |
| 51. | (1.99933) | CR ( 1) C | 10 | s(100.00%)p 0.00( 0.00%) |         |        |         |        |        |
|     |           |           |    | 1.0000                   | 0.0001  | 0.0000 | 0.0000  | 0.0000 | 0.0000 |
|     |           |           |    | -0.0001                  | 0.0000  | 0.0000 | -0.0002 | 0.0000 | 0.0000 |
|     |           |           |    | 0.0000                   | 0.0001  | 0.0000 | 0.0000  | 0.0000 | 0.0000 |
|     |           |           |    | 0.0000                   | 0.0000  | 0.0000 | 0.0000  | 0.0000 | 0.0000 |
| 52. | (1.99777) | CR ( 1) B | 11 | s(100.00%)p 0.00( 0.00%) |         |        |         |        |        |
|     |           |           |    | 1.0000                   | 0.0018  | 0.0000 | 0.0000  | 0.0000 | 0.0000 |
|     |           |           |    | 0.0001                   | 0.0000  | 0.0000 | 0.0032  | 0.0000 | 0.0000 |
|     |           |           |    | 0.0000                   | -0.0011 | 0.0000 | 0.0000  | 0.0000 | 0.0000 |
|     |           |           |    | 0.0000                   | 0.0000  | 0.0000 | -0.0001 | 0.0000 | 0.0000 |
| 53. | (1.99873) | CR ( 1) C | 12 | s(100.00%)p 0.00( 0.00%) |         |        |         |        |        |
|     |           |           |    | 1.0000                   | 0.0004  | 0.0000 | 0.0000  | 0.0000 | 0.0000 |
|     |           |           |    | -0.0002                  | 0.0000  | 0.0000 | 0.0000  | 0.0001 | 0.0000 |
|     |           |           |    | 0.0000                   | -0.0001 | 0.0000 | 0.0000  | 0.0000 | 0.0000 |
|     |           |           |    | 0.0000                   | 0.0000  | 0.0000 | 0.0000  | 0.0000 | 0.0000 |
| 54. | (1.99946) | CR ( 1) N | 13 | s(100.00%)               |         |        |         |        |        |
|     |           |           |    | 1.0000                   | 0.0001  | 0.0000 | 0.0000  | 0.0000 | 0.0000 |
|     |           |           |    | 0.0000                   | 0.0000  | 0.0000 | 0.0001  | 0.0000 | 0.0000 |
|     |           |           |    | 0.0000                   | 0.0000  | 0.0000 | 0.0000  | 0.0000 | 0.0000 |
|     |           |           |    | 0.0000                   | 0.0000  | 0.0000 | 0.0000  | 0.0000 | 0.0000 |
| 55. | (1.99911) | CR ( 1) C | 14 | s(100.00%)p 0.00( 0.00%) |         |        |         |        |        |
|     |           |           |    | 1.0000                   | 0.0003  | 0.0000 | 0.0000  | 0.0000 | 0.0000 |
|     |           |           |    | -0.0001                  | 0.0000  | 0.0000 | 0.0002  | 0.0000 | 0.0000 |
|     |           |           |    | 0.0000                   | 0.0001  | 0.0000 | 0.0000  | 0.0000 | 0.0000 |
|     |           |           |    | 0.0000                   | 0.0000  | 0.0000 | 0.0000  | 0.0000 | 0.0000 |
| 56. | (1.99911) | CR ( 1) C | 15 | s(100.00%)p 0.00( 0.00%) |         |        |         |        |        |
|     |           |           |    | 1.0000                   | 0.0003  | 0.0000 | 0.0000  | 0.0000 | 0.0000 |
|     |           |           |    | -0.0001                  | 0.0000  | 0.0000 | -0.0002 | 0.0000 | 0.0000 |
|     |           |           |    | 0.0000                   | -0.0001 | 0.0000 | 0.0000  | 0.0000 | 0.0000 |
|     |           |           |    | 0.0000                   | 0.0000  | 0.0000 | 0.0000  | 0.0000 | 0.0000 |
| 57. | (1.99946) | CR ( 1) N | 16 | s(100.00%)               |         |        |         |        |        |
|     |           |           |    | 1.0000                   | 0.0001  | 0.0000 | 0.0000  | 0.0000 | 0.0000 |



|     |           |         |      |            |                 |                 |         |         |        |
|-----|-----------|---------|------|------------|-----------------|-----------------|---------|---------|--------|
|     |           |         |      | 0.0000     | 0.0000          | 0.0000          | 0.0000  | 0.0000  | 0.0000 |
|     |           |         |      | 0.0000     | 0.0000          | 0.0000          | 0.0000  | 0.0000  | 0.0000 |
|     |           |         |      | 0.0000     | 0.0000          | 0.0000          | 0.0000  | 0.0000  | 0.0000 |
| 58. | (1.99933) | CR ( 1) | C 17 | s(100.00%) | p 0.00( 0.00%)  |                 |         |         |        |
|     |           |         |      | 1.0000     | 0.0001          | 0.0000          | 0.0000  | 0.0000  | 0.0000 |
|     |           |         |      | 0.0000     | 0.0000          | 0.0000          | 0.0001  | 0.0000  | 0.0000 |
|     |           |         |      | 0.0000     | 0.0001          | 0.0000          | 0.0000  | 0.0000  | 0.0000 |
|     |           |         |      | 0.0000     | 0.0000          | 0.0000          | 0.0000  | 0.0000  | 0.0000 |
| 59. | (1.99934) | CR ( 1) | C 18 | s(100.00%) | p 0.00( 0.00%)  |                 |         |         |        |
|     |           |         |      | 1.0000     | 0.0001          | 0.0000          | 0.0000  | 0.0000  | 0.0000 |
|     |           |         |      | 0.0000     | 0.0000          | 0.0000          | -0.0001 | 0.0000  | 0.0000 |
|     |           |         |      | 0.0000     | -0.0001         | 0.0000          | 0.0000  | 0.0000  | 0.0000 |
|     |           |         |      | 0.0000     | 0.0000          | 0.0000          | 0.0000  | 0.0000  | 0.0000 |
| 60. | (1.52100) | LP ( 1) | N 1  | s( 0.00%)  | p 1.00( 99.99%) | d 0.00( 0.01%)  |         |         |        |
|     |           |         |      | 0.0000     | -0.0002         | -0.0002         | 0.0002  | 0.0000  | 0.0000 |
|     |           |         |      | 0.0558     | 0.0004          | 0.0005          | -0.3406 | -0.0019 | 0.0000 |
|     |           |         |      | -0.0037    | -0.9384         | -0.0049         | -0.0106 | -0.0012 | 0.0000 |
|     |           |         |      | -0.0044    | -0.0067         | 0.0030          | 0.0042  | 0.0000  | 0.0000 |
| 61. | (0.74739) | LP ( 1) | B 6  | s( 0.31%)  | p99.99( 99.62%) | d 0.21( 0.06%)  |         |         |        |
|     |           |         |      | 0.0000     | 0.0557          | 0.0034          | -0.0013 | -0.0004 | 0.0000 |
|     |           |         |      | -0.0897    | 0.0043          | -0.0022         | 0.3500  | -0.0006 | 0.0000 |
|     |           |         |      | 0.0007     | 0.9303          | 0.0055          | -0.0098 | -0.0090 | 0.0000 |
|     |           |         |      | -0.0174    | 0.0150          | -0.0025         | -0.0049 | 0.0000  | 0.0000 |
| 62. | (1.96911) | LP ( 1) | O 8  | s( 60.22%) | p 0.66( 39.76%) | d 0.00( 0.02%)  |         |         |        |
|     |           |         |      | -0.0004    | 0.7760          | 0.0091          | -0.0022 | -0.0001 | 0.0000 |
|     |           |         |      | -0.1588    | -0.0019         | -0.0003         | 0.5898  | 0.0051  | 0.0000 |
|     |           |         |      | 0.0054     | -0.1565         | -0.0003         | -0.0011 | 0.0048  | 0.0000 |
|     |           |         |      | -0.0012    | 0.0061          | 0.0093          | 0.0064  | 0.0000  | 0.0000 |
| 63. | (1.77279) | LP ( 2) | O 8  | s( 0.40%)  | p99.99( 99.54%) | d 0.16( 0.06%)  |         |         |        |
|     |           |         |      | 0.0000     | 0.0633          | 0.0002          | -0.0003 | 0.0000  | 0.0000 |
|     |           |         |      | 0.9724     | 0.0174          | -0.0027         | 0.1310  | 0.0025  | 0.0000 |
|     |           |         |      | 0.0017     | -0.1795         | -0.0037         | -0.0003 | -0.0228 | 0.0000 |
|     |           |         |      | 0.0060     | 0.0052          | 0.0069          | -0.0027 | 0.0000  | 0.0000 |
| 64. | (0.61730) | LP*( 1) | B 11 | s( 0.11%)  | p99.99( 99.77%) | d 1.00( 0.11%)  |         |         |        |
|     |           |         |      | 0.0000     | 0.0334          | -0.0013         | 0.0036  | -0.0008 | 0.0000 |
|     |           |         |      | 0.0993     | 0.0094          | -0.0009         | 0.3028  | -0.0058 | 0.0000 |
|     |           |         |      | -0.0039    | 0.9466          | 0.0008          | -0.0091 | 0.0131  | 0.0000 |
|     |           |         |      | 0.0174     | 0.0204          | -0.0072         | -0.0137 | 0.0000  | 0.0000 |
| 65. | (1.55922) | LP ( 1) | N 16 | s( 0.00%)  | p 1.00( 99.99%) | d 0.00( 0.01%)  |         |         |        |
|     |           |         |      | 0.0000     | -0.0004         | 0.0012          | -0.0004 | -0.0001 | 0.0000 |
|     |           |         |      | 0.0876     | 0.0000          | 0.0005          | -0.6843 | -0.0068 | 0.0000 |
|     |           |         |      | -0.0078    | 0.7237          | 0.0068          | 0.0095  | 0.0017  | 0.0000 |
|     |           |         |      | -0.0017    | 0.0012          | 0.0045          | 0.0065  | 0.0000  | 0.0000 |
| 66. | (0.00407) | RY*( 1) | N 1  | s( 15.45%) | p 4.68( 72.34%) | d 0.79( 12.21%) |         |         |        |
|     |           |         |      | 0.0000     | -0.0104         | 0.3926          | -0.0164 | 0.0002  | 0.0000 |
|     |           |         |      | -0.0101    | 0.3152          | 0.0293          | -0.0137 | 0.7599  | 0.0000 |
|     |           |         |      | -0.0497    | 0.0040          | -0.2063         | 0.0215  | -0.3193 | 0.0000 |
|     |           |         |      | 0.1198     | 0.0178          | 0.0714          | 0.0191  | 0.0000  | 0.0000 |
| 67. | (0.00243) | RY*( 2) | N 1  | s( 0.05%)  | p99.99( 98.06%) | d37.90( 1.89%)  |         |         |        |
|     |           |         |      | 0.0000     | 0.0008          | 0.0223          | 0.0018  | -0.0001 | 0.0000 |
|     |           |         |      | 0.0010     | -0.1345         | -0.0060         | -0.0015 | 0.3145  | 0.0000 |
|     |           |         |      | 0.0220     | -0.0068         | 0.9274          | 0.0545  | 0.0664  | 0.0000 |
|     |           |         |      | 0.0951     | 0.0361          | -0.0623         | -0.0167 | 0.0000  | 0.0000 |
| 68. | (0.00202) | RY*( 3) | N 1  | s( 1.26%)  | p62.86( 79.15%) | d15.56( 19.60%) |         |         |        |
|     |           |         |      | 0.0000     | 0.0014          | 0.1058          | 0.0372  | -0.0005 | 0.0000 |
|     |           |         |      | 0.0027     | -0.8107         | -0.0532         | 0.0024  | 0.2721  | 0.0000 |
|     |           |         |      | 0.0590     | -0.0002         | -0.2296         | -0.0343 | -0.0021 | 0.0000 |
|     |           |         |      | -0.0366    | -0.1339         | -0.4143         | 0.0711  | 0.0000  | 0.0000 |
| 69. | (0.00084) | RY*( 4) | N 1  | s( 81.71%) | p 0.20( 16.63%) | d 0.02( 1.65%)  |         |         |        |
|     |           |         |      | 0.0000     | 0.0094          | 0.8917          | 0.1481  | -0.0036 | 0.0000 |
|     |           |         |      | 0.0061     | -0.0122         | -0.0175         | -0.0052 | -0.3923 | 0.0000 |
|     |           |         |      | -0.0248    | 0.0023          | 0.1052          | -0.0148 | 0.0564  | 0.0000 |
|     |           |         |      | -0.0373    | 0.0684          | -0.0596         | 0.0612  | 0.0000  | 0.0000 |
| 70. | (0.00063) | RY*( 5) | N 1  | s( 0.10%)  | p71.93( 7.04%)  | d99.99( 92.86%) |         |         |        |
|     |           |         |      | 0.0000     | 0.0003          | 0.0312          | 0.0016  | 0.0001  | 0.0000 |
|     |           |         |      | 0.0005     | 0.0129          | -0.0091         | 0.0007  | -0.0212 | 0.0000 |
|     |           |         |      | 0.0963     | 0.0025          | -0.0103         | 0.2456  | 0.1958  | 0.0000 |
|     |           |         |      | 0.3733     | -0.6497         | 0.2350          | 0.5230  | 0.0000  | 0.0000 |
| 71. | (0.00040) | RY*( 6) | N 1  | s( 0.03%)  | p99.99( 4.16%)  | d99.99( 95.81%) |         |         |        |
|     |           |         |      | 0.0000     | -0.0001         | 0.0162          | 0.0024  | 0.0001  | 0.0000 |
|     |           |         |      | -0.0002    | -0.0051         | -0.0150         | 0.0020  | 0.0373  | 0.0000 |

|     |           |         |   |   |            |                 |                 |         |         |
|-----|-----------|---------|---|---|------------|-----------------|-----------------|---------|---------|
|     |           |         |   |   | 0.0555     | 0.0045          | 0.1092          | 0.1579  | -0.2575 |
|     |           |         |   |   | -0.8551    | -0.3328         | 0.1817          | 0.1299  |         |
| 72. | (0.00019) | RY*( 7) | N | 1 | s( 15.97%) | p 0.65( 10.40%) | d 4.61( 73.63%) |         |         |
|     |           |         |   |   | 0.0000     | -0.0065         | 0.0410          | 0.3971  | 0.0174  |
|     |           |         |   |   | -0.0142    | -0.0829         | 0.0660          | 0.0185  | 0.2792  |
|     |           |         |   |   | 0.0063     | -0.0077         | -0.1191         | 0.0018  | 0.7089  |
|     |           |         |   |   | -0.2039    | 0.1477          | 0.3981          | -0.1088 |         |
| 73. | (0.00015) | RY*( 8) | N | 1 | s( 2.64%)  | p 8.69( 22.96%) | d28.17( 74.40%) |         |         |
|     |           |         |   |   | 0.0000     | -0.0048         | -0.0383         | 0.1569  | 0.0171  |
|     |           |         |   |   | 0.0189     | 0.4619          | -0.0340         | -0.0047 | 0.0845  |
|     |           |         |   |   | 0.0727     | 0.0030          | -0.0074         | -0.0466 | 0.3501  |
|     |           |         |   |   | -0.1637    | -0.2589         | -0.7263         | -0.0078 |         |
| 74. | (0.00013) | RY*( 9) | N | 1 | s( 12.10%) | p 7.11( 86.05%) | d 0.15( 1.85%)  |         |         |
|     |           |         |   |   | 0.0000     | 0.0023          | -0.0734         | 0.3395  | -0.0186 |
|     |           |         |   |   | -0.0089    | 0.0253          | -0.9084         | -0.0041 | 0.0019  |
|     |           |         |   |   | -0.1856    | 0.0013          | 0.0084          | 0.0029  | -0.1072 |
|     |           |         |   |   | 0.0420     | 0.0309          | 0.0440          | 0.0487  |         |
| 75. | (0.00006) | RY*(10) | N | 1 | s( 64.62%) | p 0.28( 17.86%) | d 0.27( 17.52%) |         |         |
| 76. | (0.00003) | RY*(11) | N | 1 | s( 4.03%)  | p23.40( 94.31%) | d 0.41( 1.66%)  |         |         |
| 77. | (0.00002) | RY*(12) | N | 1 | s( 3.43%)  | p 0.22( 0.76%)  | d27.90( 95.81%) |         |         |
| 78. | (0.00000) | RY*(13) | N | 1 | s( 0.12%)  | p99.99( 90.14%) | d79.04( 9.74%)  |         |         |
| 79. | (0.00000) | RY*(14) | N | 1 | s( 98.54%) | p 0.00( 0.25%)  | d 0.01( 1.22%)  |         |         |
| 80. | (0.00504) | RY*( 1) | C | 2 | s( 3.19%)  | p28.30( 90.19%) | d 2.08( 6.63%)  |         |         |
|     |           |         |   |   | 0.0000     | 0.0172          | 0.1700          | 0.0516  | -0.0016 |
|     |           |         |   |   | -0.0331    | -0.8702         | 0.0402          | 0.0144  | 0.2040  |
|     |           |         |   |   | -0.0501    | 0.0010          | -0.3004         | 0.0851  | 0.0812  |
|     |           |         |   |   | -0.1136    | -0.0634         | -0.2043         | 0.0322  |         |
| 81. | (0.00255) | RY*( 2) | C | 2 | s( 10.76%) | p 5.59( 60.11%) | d 2.71( 29.13%) |         |         |
|     |           |         |   |   | 0.0000     | -0.0072         | 0.3261          | -0.0347 | -0.0009 |
|     |           |         |   |   | -0.0074    | 0.2496          | -0.1771         | 0.0188  | -0.2231 |
|     |           |         |   |   | 0.0203     | 0.0428          | -0.6491         | 0.1835  | -0.2610 |
|     |           |         |   |   | -0.4200    | -0.1339         | 0.1530          | 0.0738  |         |
| 82. | (0.00211) | RY*( 3) | C | 2 | s( 38.54%) | p 1.07( 41.37%) | d 0.52( 20.09%) |         |         |
|     |           |         |   |   | 0.0000     | -0.0052         | 0.6133          | -0.0960 | 0.0000  |
|     |           |         |   |   | -0.0159    | 0.0947          | -0.4306         | 0.0112  | 0.3002  |
|     |           |         |   |   | -0.3100    | -0.0273         | 0.1772          | 0.0232  | -0.2226 |
|     |           |         |   |   | 0.3457     | 0.0548          | -0.1682         | 0.0242  |         |
| 83. | (0.00192) | RY*( 4) | C | 2 | s( 10.94%) | p 8.04( 87.97%) | d 0.10( 1.09%)  |         |         |
|     |           |         |   |   | 0.0000     | -0.0020         | 0.3251          | -0.0609 | -0.0016 |
|     |           |         |   |   | -0.0033    | -0.2734         | -0.1318         | 0.0247  | -0.8173 |
|     |           |         |   |   | 0.1345     | -0.0138         | 0.3119          | -0.0587 | 0.0626  |
|     |           |         |   |   | 0.0447     | 0.0519          | 0.0474          | -0.0025 |         |
| 84. | (0.00113) | RY*( 5) | C | 2 | s( 11.81%) | p 3.40( 40.12%) | d 4.07( 48.07%) |         |         |
|     |           |         |   |   | 0.0000     | -0.0026         | 0.3417          | 0.0360  | -0.0043 |
|     |           |         |   |   | -0.0212    | 0.0847          | 0.0816          | -0.0308 | 0.1824  |
|     |           |         |   |   | 0.5452     | 0.0012          | -0.1952         | -0.1319 | 0.2846  |
|     |           |         |   |   | 0.0782     | 0.5522          | 0.0837          | -0.2858 |         |
| 85. | (0.00107) | RY*( 6) | C | 2 | s( 7.53%)  | p 3.84( 28.97%) | d 8.43( 63.50%) |         |         |
|     |           |         |   |   | 0.0000     | -0.0001         | 0.2720          | -0.0365 | -0.0047 |
|     |           |         |   |   | -0.0179    | -0.0088         | 0.0215          | -0.0178 | 0.2663  |
|     |           |         |   |   | 0.3514     | 0.0051          | 0.2226          | -0.2111 | 0.2014  |
|     |           |         |   |   | -0.1090    | -0.5085         | 0.3891          | 0.4154  |         |
| 86. | (0.00042) | RY*( 7) | C | 2 | s( 3.53%)  | p 8.72( 30.77%) | d18.63( 65.71%) |         |         |
|     |           |         |   |   | 0.0000     | 0.0009          | -0.0960         | 0.1614  | -0.0023 |
|     |           |         |   |   | 0.0052     | 0.0269          | -0.0763         | -0.0041 | -0.1339 |
|     |           |         |   |   | 0.0739     | -0.0057         | -0.3364         | 0.4056  | 0.2786  |
|     |           |         |   |   | 0.6961     | -0.1380         | 0.1454          | 0.2339  |         |
| 87. | (0.00022) | RY*( 8) | C | 2 | s( 53.46%) | p 0.31( 16.70%) | d 0.56( 29.84%) |         |         |
|     |           |         |   |   | 0.0000     | -0.0017         | 0.1256          | 0.7202  | -0.0074 |
|     |           |         |   |   | -0.0052    | -0.0478         | 0.0578          | -0.0014 | 0.0370  |
|     |           |         |   |   | -0.3324    | 0.0000          | 0.1695          | 0.1440  | 0.0207  |
|     |           |         |   |   | -0.1659    | 0.2381          | 0.4618          | 0.0216  |         |
| 88. | (0.00017) | RY*( 9) | C | 2 | s( 16.11%) | p 2.42( 38.90%) | d 2.79( 45.00%) |         |         |
|     |           |         |   |   | 0.0000     | -0.0195         | 0.3632          | 0.1624  | 0.0485  |
|     |           |         |   |   | -0.0062    | 0.2649          | 0.5069          | 0.0014  | -0.0777 |
|     |           |         |   |   | -0.1569    | -0.0022         | 0.0489          | 0.1696  | 0.3711  |
|     |           |         |   |   | -0.0850    | -0.2796         | -0.4628         | -0.1124 |         |
| 89. | (0.00012) | RY*(10) | C | 2 | s( 7.97%)  | p 3.80( 30.28%) | d 7.75( 61.75%) |         |         |
|     |           |         |   |   | 0.0000     | -0.0065         | 0.1021          | 0.2630  | 0.0092  |
|     |           |         |   |   | 0.0012     | -0.0578         | 0.4470          | 0.0135  | -0.0257 |
|     |           |         |   |   | 0.3044     | -0.0056         | -0.0014         | -0.0783 | -0.7188 |

|      |           |                       |   |   |             |                  |                  |                  |
|------|-----------|-----------------------|---|---|-------------|------------------|------------------|------------------|
|      |           |                       |   |   | 0.2913      | -0.1117          | -0.0589          | -0.0040          |
| 90.  | (0.00007) | R <sub>Y</sub> * (11) | C | 2 | s ( 31.01%) | p 1.05 ( 32.66%) | d 1.17 ( 36.33%) |                  |
| 91.  | (0.00005) | R <sub>Y</sub> * (12) | C | 2 | s ( 1.31%)  | p70.34 ( 91.97%) | d 5.14 ( 6.72%)  |                  |
| 92.  | (0.00002) | R <sub>Y</sub> * (13) | C | 2 | s ( 7.67%)  | p 1.34 ( 10.31%) | d10.70 ( 82.03%) |                  |
| 93.  | (0.00000) | R <sub>Y</sub> * (14) | C | 2 | s ( 96.14%) | p 0.00 ( 0.05%)  | d 0.04 ( 3.81%)  |                  |
| 94.  | (0.00403) | R <sub>Y</sub> * ( 1) | N | 3 | s ( 12.46%) | p 6.02 ( 75.01%) | d 1.00 ( 12.52%) |                  |
|      |           |                       |   |   | 0.0000      | -0.0106          | 0.3528           | -0.0056          |
|      |           |                       |   |   | 0.0003      | -0.1548          | 0.0438           | 0.0172           |
|      |           |                       |   |   | 0.0212      | -0.0063          | 0.2992           | -0.0034          |
|      |           |                       |   |   | 0.0597      | -0.0021          | 0.1226           | -0.0191          |
| 95.  | (0.00236) | R <sub>Y</sub> * ( 2) | N | 3 | s ( 0.05%)  | p99.99 ( 97.81%) | d40.19 ( 2.14%)  |                  |
|      |           |                       |   |   | 0.0000      | 0.0006           | 0.0224           | -0.0056          |
|      |           |                       |   |   | -0.0003     | -0.1936          | -0.0189          | -0.0010          |
|      |           |                       |   |   | 0.0271      | -0.0003          | 0.8931           | 0.0607           |
|      |           |                       |   |   | 0.0846      | 0.0645           | -0.0726          | -0.0104          |
| 96.  | (0.00199) | R <sub>Y</sub> * ( 3) | N | 3 | s ( 0.05%)  | p99.99 ( 82.25%) | d99.99 ( 17.70%) |                  |
|      |           |                       |   |   | 0.0000      | 0.0000           | -0.0032          | 0.0222           |
|      |           |                       |   |   | 0.0006      | 0.8713           | 0.0856           | 0.0018           |
|      |           |                       |   |   | 0.0141      | -0.0008          | 0.2323           | 0.0097           |
|      |           |                       |   |   | -0.3584     | 0.1553           | -0.0011          | 0.1561           |
| 97.  | (0.00079) | R <sub>Y</sub> * ( 4) | N | 3 | s ( 83.40%) | p 0.15 ( 12.74%) | d 0.05 ( 3.86%)  |                  |
|      |           |                       |   |   | 0.0000      | 0.0091           | 0.9055           | 0.1185           |
|      |           |                       |   |   | 0.0101      | 0.1094           | 0.0256           | -0.0007          |
|      |           |                       |   |   | 0.3093      | -0.0295          | -0.0001          | -0.1296          |
|      |           |                       |   |   | -0.0373     | 0.0642           | -0.1352          | -0.0107          |
| 98.  | (0.00069) | R <sub>Y</sub> * ( 5) | N | 3 | s ( 1.17%)  | p 6.48 ( 7.59%)  | d77.94 ( 91.24%) |                  |
|      |           |                       |   |   | 0.0000      | 0.0010           | 0.1072           | 0.0149           |
|      |           |                       |   |   | -0.0007     | 0.0211           | -0.0198          | 0.0035           |
|      |           |                       |   |   | 0.0183      | 0.1028           | 0.0089           | -0.0550          |
|      |           |                       |   |   | 0.2471      | 0.2475           | 0.7513           | 0.4379           |
| 99.  | (0.00041) | R <sub>Y</sub> * ( 6) | N | 3 | s ( 0.01%)  | p 1.00 ( 3.78%)  | d25.48 ( 96.22%) |                  |
|      |           |                       |   |   | 0.0000      | -0.0001          | 0.0077           | -0.0053          |
|      |           |                       |   |   | -0.0008     | -0.0005          | -0.0001          | -0.0221          |
|      |           |                       |   |   | 0.0023      | 0.0430           | 0.0767           | 0.0049           |
|      |           |                       |   |   | 0.1138      | 0.1287           | -0.2410          | -0.5130          |
| 100. | (0.00020) | R <sub>Y</sub> * ( 7) | N | 3 | s ( 4.23%)  | p 4.94 ( 20.90%) | d17.70 ( 74.87%) |                  |
|      |           |                       |   |   | 0.0000      | -0.0043          | 0.1049           | 0.1766           |
|      |           |                       |   |   | 0.0101      | -0.0273          | -0.3638          | 0.2567           |
|      |           |                       |   |   | -0.0052     | -0.0376          | -0.0784          | 0.0002           |
|      |           |                       |   |   | -0.0188     | 0.0454           | -0.7881          | 0.2729           |
| 101. | (0.00014) | R <sub>Y</sub> * ( 8) | N | 3 | s ( 21.66%) | p 3.03 ( 65.56%) | d 0.59 ( 12.77%) |                  |
|      |           |                       |   |   | 0.0000      | 0.0036           | -0.0282          | 0.4640           |
|      |           |                       |   |   | -0.0234     | -0.0106          | -0.0803          | -0.5607          |
|      |           |                       |   |   | 0.0069      | 0.0837           | 0.5295           | -0.0037          |
|      |           |                       |   |   | -0.1730     | 0.0699           | 0.1088           | 0.2780           |
| 102. | (0.00015) | R <sub>Y</sub> * ( 9) | N | 3 | s ( 37.81%) | p 0.35 ( 13.37%) | d 1.29 ( 48.82%) |                  |
|      |           |                       |   |   | 0.0000      | -0.0058          | -0.0521          | 0.6122           |
|      |           |                       |   |   | 0.0236      | 0.0060           | 0.1582           | -0.0666          |
|      |           |                       |   |   | -0.0079     | -0.2903          | -0.0680          | 0.0035           |
|      |           |                       |   |   | 0.1223      | 0.0168           | 0.2047           | -0.1086          |
|      |           |                       |   |   | -0.0086     | 0.3367%          | p 1.14 ( 38.37%) | d 0.83 ( 27.96%) |
| 103. | (0.00008) | R <sub>Y</sub> * (10) | N | 3 | s ( 4.79%)  | p19.03 ( 91.17%) | d 0.84 ( 4.04%)  |                  |
| 104. | (0.00003) | R <sub>Y</sub> * (11) | N | 3 | s ( 2.18%)  | p 0.38 ( 0.83%)  | d44.46 ( 96.99%) |                  |
| 105. | (0.00002) | R <sub>Y</sub> * (12) | N | 3 | s ( 0.02%)  | p99.99 ( 90.52%) | d99.99 ( 9.46%)  |                  |
| 106. | (0.00000) | R <sub>Y</sub> * (13) | N | 3 | s ( 98.54%) | p 0.00 ( 0.20%)  | d 0.01 ( 1.26%)  |                  |
| 107. | (0.00000) | R <sub>Y</sub> * (14) | N | 3 | s ( 0.02%)  | p99.99 ( 82.54%) | d99.99 ( 17.43%) |                  |
| 108. | (0.00384) | R <sub>Y</sub> * ( 1) | C | 4 | 0.0000      | 0.0001           | 0.0146           | 0.0004           |
|      |           |                       |   |   | 0.0005      | 0.0023           | 0.0454           | -0.0165          |
|      |           |                       |   |   | -0.2982     | 0.0639           | -0.0342          | -0.8356          |
|      |           |                       |   |   | 0.1749      | 0.1316           | 0.3191           | -0.1632          |
| 109. | (0.00300) | R <sub>Y</sub> * ( 2) | C | 4 | s ( 5.65%)  | p14.91 ( 84.18%) | d 1.80 ( 10.18%) |                  |
|      |           |                       |   |   | 0.0000      | -0.0042          | 0.2369           | 0.0168           |
|      |           |                       |   |   | 0.0059      | -0.0209          | -0.5686          | -0.0926          |
|      |           |                       |   |   | 0.0113      | -0.6553          | -0.1840          | -0.0052          |
|      |           |                       |   |   | 0.2065      | 0.0587           | 0.1870           | -0.0568          |
|      |           |                       |   |   | 0.0167      | 0.1424%          | p 5.56 ( 79.24%) | d 0.46 ( 6.52%)  |
| 110. | (0.00127) | R <sub>Y</sub> * ( 3) | C | 4 | 0.0000      | -0.0012          | 0.3773           | 0.0030           |
|      |           |                       |   |   | 0.0082      | 0.0220           | -0.5279          | -0.1787          |
|      |           |                       |   |   | -0.0352     | 0.5771           | 0.2878           | 0.0140           |
|      |           |                       |   |   | 0.1846      | -0.0571          | 0.0475           | 0.1566           |
|      |           |                       |   |   | -0.0331     | 0.7373%          | p 0.24 ( 17.64%) | d 0.12 ( 8.63%)  |
| 111. | (0.00050) | R <sub>Y</sub> * ( 4) | C | 4 |             |                  |                  |                  |

|      |           |         |   |   |            |                 |                 |         |         |
|------|-----------|---------|---|---|------------|-----------------|-----------------|---------|---------|
|      |           |         |   |   | 0.0000     | 0.0020          | 0.8527          | 0.1000  | 0.0134  |
|      |           |         |   |   | 0.0094     | 0.3776          | -0.0891         | 0.0173  | -0.1195 |
|      |           |         |   |   | 0.0459     | -0.0060         | 0.0905          | -0.0291 | -0.1190 |
|      |           |         |   |   | 0.0146     | -0.0798         | -0.2211         | 0.1292  |         |
| 112. | (0.00042) | RY*( 5) | C | 4 | s( 0.28%)  | p26.27( 7.29%)  | d99.99( 92.43%) |         |         |
|      |           |         |   |   | 0.0000     | 0.0001          | 0.0523          | 0.0065  | -0.0001 |
|      |           |         |   |   | 0.0006     | 0.0302          | -0.0149         | 0.0021  | -0.0899 |
|      |           |         |   |   | 0.0469     | 0.0032          | -0.2335         | 0.0835  | -0.0844 |
|      |           |         |   |   | -0.0298    | 0.7332          | -0.3159         | -0.5281 |         |
| 113. | (0.00015) | RY*( 6) | C | 4 | s( 17.67%) | p 3.71( 65.49%) | d 0.95( 16.84%) |         |         |
|      |           |         |   |   | 0.0000     | 0.0165          | -0.2577         | 0.3206  | -0.0853 |
|      |           |         |   |   | -0.0169    | -0.0827         | -0.7022         | 0.0030  | -0.1589 |
|      |           |         |   |   | 0.3216     | -0.0021         | 0.0560          | -0.1510 | -0.0736 |
|      |           |         |   |   | -0.0138    | -0.0435         | -0.3633         | 0.1700  |         |
| 114. | (0.00012) | RY*( 7) | C | 4 | s( 5.73%)  | p12.22( 69.98%) | d 4.24( 24.29%) |         |         |
|      |           |         |   |   | 0.0000     | 0.0095          | 0.0416          | 0.2258  | -0.0667 |
|      |           |         |   |   | 0.0044     | -0.1693         | -0.2618         | -0.0271 | 0.2486  |
|      |           |         |   |   | -0.6880    | 0.0099          | -0.0976         | 0.2389  | -0.4616 |
|      |           |         |   |   | 0.1567     | 0.0212          | 0.0147          | 0.0677  |         |
| 115. | (0.00008) | RY*( 8) | C | 4 | s( 15.02%) | p 2.85( 42.76%) | d 2.81( 42.22%) |         |         |
| 116. | (0.00005) | RY*( 9) | C | 4 | s( 5.25%)  | p 2.05( 10.76%) | d16.00( 83.99%) |         |         |
| 117. | (0.00003) | RY*(10) | C | 4 | s( 0.11%)  | p99.99( 92.44%) | d70.37( 7.45%)  |         |         |
| 118. | (0.00002) | RY*(11) | C | 4 | s( 63.60%) | p 0.11( 7.21%)  | d 0.46( 29.19%) |         |         |
| 119. | (0.00000) | RY*(12) | C | 4 | s( 98.34%) | p 0.01( 0.76%)  | d 0.01( 0.90%)  |         |         |
| 120. | (0.00000) | RY*(13) | C | 4 | s( 0.03%)  | p99.99( 17.85%) | d99.99( 82.12%) |         |         |
| 121. | (0.00001) | RY*(14) | C | 4 | s( 0.39%)  | p56.81( 22.02%) | d99.99( 77.59%) |         |         |
| 122. | (0.00382) | RY*( 1) | C | 5 | s( 0.01%)  | p99.99( 82.81%) | d99.99( 17.18%) |         |         |
|      |           |         |   |   | 0.0000     | -0.0001         | 0.0122          | 0.0001  | 0.0008  |
|      |           |         |   |   | 0.0012     | 0.0630          | -0.0121         | -0.0126 | -0.2710 |
|      |           |         |   |   | 0.0710     | -0.0346         | -0.8462         | 0.1673  | 0.1364  |
|      |           |         |   |   | 0.3882     | 0.0137          | -0.0267         | 0.0396  |         |
| 123. | (0.00294) | RY*( 2) | C | 5 | s( 5.54%)  | p15.11( 83.76%) | d 1.93( 10.70%) |         |         |
|      |           |         |   |   | 0.0000     | -0.0044         | 0.2344          | 0.0205  | 0.0054  |
|      |           |         |   |   | -0.0239    | -0.1021         | 0.0304          | 0.0013  | 0.8377  |
|      |           |         |   |   | 0.2019     | -0.0010         | -0.2778         | -0.0773 | -0.3019 |
|      |           |         |   |   | 0.0837     | -0.0330         | -0.0807         | 0.0357  |         |
| 124. | (0.00131) | RY*( 3) | C | 5 | s( 14.71%) | p 5.39( 79.38%) | d 0.40( 5.91%)  |         |         |
|      |           |         |   |   | 0.0000     | -0.0011         | 0.3828          | 0.0219  | 0.0098  |
|      |           |         |   |   | 0.0401     | -0.7753         | -0.3242         | 0.0179  | -0.2271 |
|      |           |         |   |   | -0.1783    | -0.0043         | 0.0228          | 0.0423  | -0.2017 |
|      |           |         |   |   | 0.0747     | -0.0534         | -0.0996         | 0.0068  |         |
| 125. | (0.00051) | RY*( 4) | C | 5 | s( 74.28%) | p 0.25( 18.67%) | d 0.10( 7.06%)  |         |         |
|      |           |         |   |   | 0.0000     | 0.0014          | 0.8591          | 0.0675  | 0.0126  |
|      |           |         |   |   | -0.0033    | 0.4112          | -0.0867         | -0.0191 | -0.0812 |
|      |           |         |   |   | 0.0106     | 0.0067          | 0.0541          | -0.0037 | 0.2242  |
|      |           |         |   |   | -0.1214    | 0.0359          | 0.0117          | 0.0645  |         |
| 126. | (0.00042) | RY*( 5) | C | 5 | s( 0.13%)  | p55.16( 7.07%)  | d99.99( 92.81%) |         |         |
|      |           |         |   |   | 0.0000     | 0.0001          | 0.0355          | 0.0045  | 0.0001  |
|      |           |         |   |   | 0.0004     | -0.0017         | 0.0086          | -0.0018 | 0.0817  |
|      |           |         |   |   | -0.0196    | -0.0033         | 0.2385          | -0.0813 | 0.1610  |
|      |           |         |   |   | 0.5545     | 0.6206          | -0.2761         | -0.3650 |         |
| 127. | (0.00015) | RY*( 6) | C | 5 | s( 14.57%) | p 4.54( 66.13%) | d 1.33( 19.31%) |         |         |
|      |           |         |   |   | 0.0000     | 0.0165          | -0.2282         | 0.2904  | -0.0949 |
|      |           |         |   |   | -0.0170    | 0.0378          | -0.7791         | 0.0052  | 0.1708  |
|      |           |         |   |   | 0.1156     | -0.0030         | -0.0540         | -0.0837 | 0.3683  |
|      |           |         |   |   | -0.1583    | 0.0678          | -0.1250         | 0.1100  |         |
| 128. | (0.00012) | RY*( 7) | C | 5 | s( 5.98%)  | p11.52( 68.94%) | d 4.19( 25.08%) |         |         |
|      |           |         |   |   | 0.0000     | 0.0098          | 0.0566          | 0.2284  | -0.0660 |
|      |           |         |   |   | 0.0207     | -0.2972         | 0.1994          | 0.0206  | -0.1327 |
|      |           |         |   |   | 0.6971     | -0.0057         | 0.0276          | -0.2368 | 0.1661  |
|      |           |         |   |   | -0.0436    | 0.1924          | 0.4283          | 0.0282  |         |
| 129. | (0.00008) | RY*( 8) | C | 5 | s( 23.54%) | p 1.92( 45.23%) | d 1.33( 31.24%) |         |         |
| 130. | (0.00005) | RY*( 9) | C | 5 | s( 10.46%) | p 1.23( 12.89%) | d 7.32( 76.64%) |         |         |
| 131. | (0.00002) | RY*(10) | C | 5 | s( 0.02%)  | p99.99( 94.02%) | d99.99( 5.96%)  |         |         |
| 132. | (0.00003) | RY*(11) | C | 5 | s( 32.44%) | p 0.21( 6.95%)  | d 1.87( 60.61%) |         |         |
| 133. | (0.00000) | RY*(12) | C | 5 | s( 2.06%)  | p 8.30( 17.06%) | d39.33( 80.88%) |         |         |
| 134. | (0.00001) | RY*(13) | C | 5 | s( 18.25%) | p 0.91( 16.54%) | d 3.57( 65.21%) |         |         |
| 135. | (0.00000) | RY*(14) | C | 5 | s( 98.04%) | p 0.01( 0.73%)  | d 0.01( 1.22%)  |         |         |
| 136. | (0.00332) | RY*( 1) | B | 6 | s( 37.85%) | p 1.49( 56.32%) | d 0.15( 5.82%)  |         |         |
|      |           |         |   |   | 0.0000     | 0.0049          | 0.6124          | 0.0564  | 0.0157  |
|      |           |         |   |   | 0.0004     | -0.7412         | -0.0538         | 0.0042  | 0.0738  |

|      |           |         |     |            |                 |                 |         |         |
|------|-----------|---------|-----|------------|-----------------|-----------------|---------|---------|
|      |           |         |     | 0.0159     | -0.0011         | -0.0560         | 0.0461  | -0.1944 |
|      |           |         |     | 0.0556     | 0.0461          | 0.1234          | -0.0015 |         |
| 137. | (0.00186) | RY*( 2) | B 6 | s( 15.19%) | p 4.19( 63.73%) | d 1.39( 21.08%) |         |         |
|      |           |         |     | 0.0000     | -0.0165         | 0.3807          | -0.0803 | 0.0174  |
|      |           |         |     | -0.0056    | 0.3743          | 0.3421          | 0.0069  | -0.5877 |
|      |           |         |     | 0.1332     | -0.0069         | 0.1031          | 0.0792  | -0.3499 |
|      |           |         |     | 0.1020     | 0.0871          | 0.2650          | 0.0109  |         |
| 138. | (0.00121) | RY*( 3) | B 6 | s( 30.06%) | p 2.28( 68.51%) | d 0.05( 1.44%)  |         |         |
|      |           |         |     | 0.0000     | -0.0062         | 0.5463          | -0.0335 | -0.0317 |
|      |           |         |     | 0.0068     | 0.5290          | -0.2502         | -0.0036 | 0.5350  |
|      |           |         |     | 0.1413     | -0.0022         | -0.1895         | -0.0223 | 0.0674  |
|      |           |         |     | -0.0221    | 0.0702          | 0.0514          | 0.0421  |         |
| 139. | (0.00078) | RY*( 4) | B 6 | s( 8.17%)  | p 9.96( 81.36%) | d 1.28( 10.47%) |         |         |
|      |           |         |     | 0.0000     | 0.0065          | 0.2809          | 0.0095  | -0.0512 |
|      |           |         |     | 0.0022     | 0.0802          | -0.3860         | -0.0053 | -0.2103 |
|      |           |         |     | -0.3593    | -0.0056         | 0.6586          | -0.2258 | 0.1220  |
|      |           |         |     | -0.0340    | -0.0775         | -0.2872         | 0.0134  |         |
| 140. | (0.00065) | RY*( 5) | B 6 | s( 2.66%)  | p30.26( 80.62%) | d 6.28( 16.72%) |         |         |
|      |           |         |     | 0.0000     | -0.0154         | -0.0638         | 0.1492  | 0.0088  |
|      |           |         |     | -0.0014    | 0.0456          | 0.4709          | 0.0123  | 0.4806  |
|      |           |         |     | -0.4576    | -0.0046         | 0.3706          | -0.0663 | -0.1628 |
|      |           |         |     | 0.1474     | 0.1170          | 0.3242          | -0.0119 |         |
| 141. | (0.00052) | RY*( 6) | B 6 | s( 0.80%)  | p99.99( 94.12%) | d 6.34( 5.08%)  |         |         |
|      |           |         |     | 0.0000     | -0.0016         | -0.0614         | -0.0174 | 0.0627  |
|      |           |         |     | 0.0011     | -0.0959         | 0.1254          | -0.0077 | 0.1527  |
|      |           |         |     | 0.7436     | 0.0018          | 0.4450          | -0.3768 | 0.1149  |
|      |           |         |     | 0.1900     | 0.0024          | 0.0342          | 0.0173  |         |
| 142. | (0.00029) | RY*( 7) | B 6 | s( 51.67%) | p 0.20( 10.55%) | d 0.73( 37.78%) |         |         |
|      |           |         |     | 0.0000     | -0.0012         | -0.1268         | 0.7075  | -0.0084 |
|      |           |         |     | 0.0025     | 0.0541          | -0.2656         | -0.0117 | -0.0381 |
|      |           |         |     | 0.1510     | -0.0112         | 0.0638          | -0.0585 | -0.3310 |
|      |           |         |     | -0.4150    | 0.2552          | 0.1393          | -0.1069 |         |
| 143. | (0.00027) | RY*( 8) | B 6 | s( 17.00%) | p 0.78( 13.31%) | d 4.10( 69.68%) |         |         |
|      |           |         |     | 0.0000     | 0.0018          | -0.0837         | 0.3988  | 0.0634  |
|      |           |         |     | -0.0033    | 0.0541          | -0.3227         | 0.0034  | -0.0975 |
|      |           |         |     | -0.0407    | 0.0188          | -0.0840         | 0.0863  | 0.0546  |
|      |           |         |     | 0.7407     | -0.1905         | 0.2285          | 0.2382  |         |
| 144. | (0.00015) | RY*( 9) | B 6 | s( 34.87%) | p 0.68( 23.65%) | d 1.19( 41.48%) |         |         |
|      |           |         |     | 0.0000     | -0.0044         | 0.2550          | 0.5320  | -0.0253 |
|      |           |         |     | 0.0026     | 0.0467          | 0.4593          | 0.0016  | -0.0609 |
|      |           |         |     | 0.0034     | 0.0076          | -0.1324         | -0.0451 | 0.3642  |
|      |           |         |     | -0.0213    | -0.3548         | -0.3187         | -0.2330 |         |
| 145. | (0.00012) | RY*(10) | B 6 | s( 0.45%)  | p99.99( 91.05%) | d18.73( 8.50%)  |         |         |
|      |           |         |     | 0.0000     | 0.0028          | 0.0138          | 0.0492  | 0.0438  |
|      |           |         |     | -0.0010    | -0.0063         | -0.0106         | 0.0067  | 0.0725  |
|      |           |         |     | 0.1742     | 0.0032          | 0.3639          | 0.8616  | 0.2376  |
|      |           |         |     | -0.0165    | 0.1408          | -0.0334         | -0.0854 |         |
| 146. | (0.00008) | RY*(11) | B 6 | s( 2.73%)  | p 3.15( 8.60%)  | d32.47( 88.67%) |         |         |
| 147. | (0.00004) | RY*(12) | B 6 | s( 0.67%)  | p 5.07( 3.38%)  | d99.99( 95.95%) |         |         |
| 148. | (0.00005) | RY*(13) | B 6 | s( 96.49%) | p 0.01( 0.55%)  | d 0.03( 2.96%)  |         |         |
| 149. | (0.00004) | RY*(14) | B 6 | s( 1.48%)  | p 2.94( 4.34%)  | d63.79( 94.18%) |         |         |
| 150. | (0.01708) | RY*( 1) | C 7 | s( 21.80%) | p 3.56( 77.53%) | d 0.03( 0.66%)  |         |         |
|      |           |         |     | 0.0000     | -0.0467         | 0.4645          | 0.0057  | -0.0072 |
|      |           |         |     | 0.0266     | 0.1494          | -0.0040         | -0.0662 | -0.8346 |
|      |           |         |     | -0.0335    | 0.0255          | 0.2226          | 0.0000  | 0.0262  |
|      |           |         |     | 0.0013     | -0.0401         | -0.0626         | 0.0203  |         |
| 151. | (0.00511) | RY*( 2) | C 7 | s( 0.15%)  | p77.66( 11.64%) | d99.99( 88.21%) |         |         |
|      |           |         |     | 0.0000     | 0.0026          | 0.0304          | -0.0238 | -0.0014 |
|      |           |         |     | 0.0046     | -0.0678         | -0.0065         | 0.0143  | -0.0046 |
|      |           |         |     | -0.0919    | 0.0496          | -0.1556         | -0.2764 | -0.0531 |
|      |           |         |     | 0.1332     | -0.7885         | 0.2475          | 0.4226  |         |
| 152. | (0.00299) | RY*( 3) | C 7 | s( 8.36%)  | p 1.31( 10.92%) | d 9.65( 80.72%) |         |         |
|      |           |         |     | 0.0000     | 0.0053          | 0.2490          | -0.1470 | 0.0006  |
|      |           |         |     | 0.0177     | 0.2050          | -0.1096         | -0.0140 | 0.2318  |
|      |           |         |     | -0.0070    | 0.0017          | -0.0102         | 0.0272  | 0.8003  |
|      |           |         |     | -0.1830    | -0.1749         | -0.3181         | 0.0383  |         |
| 153. | (0.00136) | RY*( 4) | C 7 | s( 39.69%) | p 0.57( 22.78%) | d 0.95( 37.54%) |         |         |
|      |           |         |     | 0.0000     | -0.0033         | 0.6216          | -0.1020 | -0.0082 |
|      |           |         |     | 0.0065     | -0.3607         | 0.0440          | -0.0501 | 0.2824  |
|      |           |         |     | 0.0582     | 0.0133          | -0.0986         | -0.0124 | -0.3726 |
|      |           |         |     | 0.0950     | -0.0458         | -0.4743         | -0.0207 |         |

|      |           |         |   |   |                                                                                                                                                                                                       |
|------|-----------|---------|---|---|-------------------------------------------------------------------------------------------------------------------------------------------------------------------------------------------------------|
| 154. | (0.00024) | RY*( 5) | C | 7 | s( 1.62%)p52.69( 85.48%)d 7.95( 12.90%)<br>0.0000 -0.0019 0.1245 -0.0177 0.0201<br>-0.0100 0.8694 -0.0990 -0.0140 0.1608<br>0.0980 0.0085 -0.2095 -0.0974 -0.3209<br>0.1286 -0.0195 -0.0654 -0.0691   |
| 155. | (0.00022) | RY*( 6) | C | 7 | s( 36.18%)p 0.51( 18.32%)d 1.26( 45.50%)<br>0.0000 0.0258 0.5202 0.2935 -0.0665<br>0.0039 0.0284 0.0072 -0.0248 0.2500<br>-0.3224 0.0064 -0.0323 0.1189 0.0839<br>-0.0533 0.2475 0.6089 0.1145        |
| 156. | (0.00013) | RY*( 7) | C | 7 | s( 8.88%)p 9.43( 83.73%)d 0.83( 7.39%)<br>0.0000 -0.0074 0.1253 0.2671 0.0418<br>0.0042 -0.0672 -0.3603 -0.0066 0.0921<br>0.7867 0.0027 0.2746 -0.0044 -0.0066<br>-0.1278 -0.1105 0.2106 -0.0301      |
| 157. | (0.00009) | RY*( 8) | C | 7 | s( 15.82%)p 4.59( 72.62%)d 0.73( 11.55%)                                                                                                                                                              |
| 158. | (0.00006) | RY*( 9) | C | 7 | s( 38.71%)p 0.69( 26.63%)d 0.90( 34.66%)                                                                                                                                                              |
| 159. | (0.00006) | RY*(10) | C | 7 | s( 13.70%)p 5.87( 80.43%)d 0.43( 5.87%)                                                                                                                                                               |
| 160. | (0.00004) | RY*(11) | C | 7 | s( 3.24%)p28.32( 91.81%)d 1.53( 4.95%)                                                                                                                                                                |
| 161. | (0.00000) | RY*(12) | C | 7 | s( 99.43%)p 0.00( 0.43%)d 0.00( 0.14%)                                                                                                                                                                |
| 162. | (0.00001) | RY*(13) | C | 7 | s( 0.27%)p34.84( 9.44%)d99.99( 90.29%)                                                                                                                                                                |
| 163. | (0.00001) | RY*(14) | C | 7 | s( 11.63%)p 0.78( 9.12%)d 6.81( 79.25%)                                                                                                                                                               |
| 164. | (0.00547) | RY*( 1) | O | 8 | s( 1.07%)p90.26( 96.41%)d 2.36( 2.53%)<br>0.0000 0.0026 0.1033 -0.0036 0.0002<br>0.0135 -0.9595 -0.0114 -0.0034 -0.1501<br>-0.0032 -0.0037 0.1430 0.0028 -0.1495<br>0.0365 0.0237 0.0318 -0.0022      |
| 165. | (0.00304) | RY*( 2) | O | 8 | s( 0.57%)p99.99( 98.11%)d 2.30( 1.32%)<br>0.0000 0.0016 0.0754 0.0063 0.0009<br>-0.0038 -0.0858 0.0023 -0.0069 -0.2855<br>0.0077 -0.0170 -0.9443 0.0056 -0.0167<br>0.0291 -0.0961 0.0285 0.0446       |
| 166. | (0.00190) | RY*( 3) | O | 8 | s( 89.46%)p 0.12( 10.48%)d 0.00( 0.05%)<br>0.0000 -0.0033 0.9423 0.0814 0.0032<br>0.0006 0.0523 -0.0259 -0.0122 0.2845<br>0.1361 0.0037 -0.0166 -0.0384 0.0078<br>-0.0067 0.0103 -0.0109 -0.0145      |
| 167. | (0.00029) | RY*( 4) | O | 8 | s( 13.42%)p 6.38( 85.59%)d 0.07( 1.00%)<br>0.0000 -0.0240 -0.2319 0.2824 -0.0057<br>-0.0031 -0.1914 0.0476 0.0293 0.8328<br>-0.2269 -0.0078 -0.2501 0.0919 -0.0304<br>-0.0272 -0.0602 -0.0148 -0.0668 |
| 168. | (0.00005) | RY*( 5) | O | 8 | s( 38.58%)p 0.65( 25.03%)d 0.94( 36.39%)                                                                                                                                                              |
| 169. | (0.00000) | RY*( 6) | O | 8 | s( 99.91%)p 0.00( 0.04%)d 0.00( 0.05%)                                                                                                                                                                |
| 170. | (0.00001) | RY*( 7) | O | 8 | s( 15.64%)p 4.92( 76.91%)d 0.48( 7.45%)                                                                                                                                                               |
| 171. | (0.00001) | RY*( 8) | O | 8 | s( 1.41%)p69.37( 97.74%)d 0.60( 0.85%)                                                                                                                                                                |
| 172. | (0.00000) | RY*( 9) | O | 8 | s( 1.13%)p87.21( 98.38%)d 0.43( 0.49%)                                                                                                                                                                |
| 173. | (0.00000) | RY*(10) | O | 8 | s( 0.71%)p 4.54( 3.20%)d99.99( 96.09%)                                                                                                                                                                |
| 174. | (0.00000) | RY*(11) | O | 8 | s( 0.22%)p 1.61( 0.35%)d99.99( 99.44%)                                                                                                                                                                |
| 175. | (0.00000) | RY*(12) | O | 8 | s( 0.95%)p 2.67( 2.53%)d99.99( 96.53%)                                                                                                                                                                |
| 176. | (0.00001) | RY*(13) | O | 8 | s( 36.81%)p 0.12( 4.38%)d 1.60( 58.81%)                                                                                                                                                               |
| 177. | (0.00000) | RY*(14) | O | 8 | s( 0.17%)p 6.48( 1.13%)d99.99( 98.70%)                                                                                                                                                                |
| 178. | (0.00172) | RY*( 1) | C | 9 | s( 3.14%)p25.22( 79.23%)d 5.61( 17.63%)<br>0.0000 -0.0016 0.1721 0.0425 0.0017<br>0.0129 0.5567 0.0152 0.0192 -0.5724<br>-0.0583 -0.0147 -0.3423 0.1822 -0.2019<br>0.0860 0.2772 -0.1227 -0.1905      |
| 179. | (0.00162) | RY*( 2) | C | 9 | s( 0.60%)p99.99( 79.22%)d33.84( 20.18%)<br>0.0000 0.0012 0.0516 0.0574 0.0005<br>0.0138 0.6512 0.1104 0.0106 0.1629<br>-0.1650 0.0046 0.5404 -0.0995 -0.2191<br>0.0618 -0.2996 0.1263 0.2105          |
| 180. | (0.00121) | RY*( 3) | C | 9 | s( 7.82%)p11.01( 86.15%)d 0.77( 6.03%)<br>0.0000 -0.0046 0.2797 -0.0014 -0.0029<br>-0.0055 -0.3172 -0.1801 0.0318 -0.7012<br>-0.0842 -0.0075 0.4724 -0.0737 0.1126<br>-0.0659 -0.1386 0.0436 0.1488   |
| 181. | (0.00034) | RY*( 4) | C | 9 | s( 45.00%)p 1.11( 49.83%)d 0.12( 5.18%)<br>0.0000 0.0053 0.6371 0.2099 0.0035<br>-0.0020 -0.1648 0.1788 -0.0005 0.2588<br>-0.5430 -0.0010 -0.0625 0.2710 0.0279                                       |

|      |           |         |   |    |                                                                                                                                                                                                                                    |
|------|-----------|---------|---|----|------------------------------------------------------------------------------------------------------------------------------------------------------------------------------------------------------------------------------------|
| 182. | (0.00012) | RY*( 5) | C | 9  | 0.0166 0.1354 0.1782 -0.0248<br>s( 5.77%)p13.45( 77.63%)d 2.88( 16.60%)<br>0.0000 0.0101 -0.1584 0.1640 -0.0751<br>-0.0093 0.0968 -0.7531 0.0037 0.1441<br>-0.3580 -0.0033 0.0637 0.2160 0.1114<br>-0.0403 -0.0258 -0.3869 -0.0402 |
| 183. | (0.00006) | RY*( 6) | C | 9  | s( 41.89%)p 1.32( 55.47%)d 0.06( 2.64%)                                                                                                                                                                                            |
| 184. | (0.00005) | RY*( 7) | C | 9  | s( 1.62%)p59.04( 95.41%)d 1.84( 2.98%)                                                                                                                                                                                             |
| 185. | (0.00005) | RY*( 8) | C | 9  | s( 0.40%)p80.67( 32.63%)d99.99( 66.96%)                                                                                                                                                                                            |
| 186. | (0.00003) | RY*( 9) | C | 9  | s( 7.25%)p 0.87( 6.33%)d11.93( 86.42%)                                                                                                                                                                                             |
| 187. | (0.00001) | RY*(10) | C | 9  | s( 0.15%)p32.11( 4.79%)d99.99( 95.06%)                                                                                                                                                                                             |
| 188. | (0.00002) | RY*(11) | C | 9  | s( 78.66%)p 0.16( 12.60%)d 0.11( 8.75%)                                                                                                                                                                                            |
| 189. | (0.00001) | RY*(12) | C | 9  | s( 1.10%)p13.27( 14.63%)d76.47( 84.27%)                                                                                                                                                                                            |
| 190. | (0.00000) | RY*(13) | C | 9  | s( 98.68%)p 0.01( 0.94%)d 0.00( 0.38%)                                                                                                                                                                                             |
| 191. | (0.00000) | RY*(14) | C | 9  | s( 7.87%)p 0.69( 5.41%)d11.03( 86.73%)                                                                                                                                                                                             |
| 192. | (0.00214) | RY*( 1) | C | 10 | s( 0.17%)p99.99( 76.15%)d99.99( 23.68%)<br>0.0000 0.0000 0.0402 -0.0069 0.0009<br>-0.0012 -0.0369 -0.0192 -0.0048 -0.2263<br>0.0899 -0.0139 -0.8091 0.2138 -0.0855<br>-0.2547 -0.3266 0.1249 0.2058                                |
| 193. | (0.00162) | RY*( 2) | C | 10 | s( 1.75%)p49.11( 86.00%)d 6.99( 12.25%)<br>0.0000 0.0023 0.1041 0.0816 0.0024<br>0.0060 0.7763 0.2212 -0.0189 -0.4343<br>0.0743 0.0056 0.1177 0.0057 0.0989<br>-0.0502 0.0699 0.3240 -0.0177                                       |
| 194. | (0.00081) | RY*( 3) | C | 10 | s( 32.87%)p 2.01( 66.05%)d 0.03( 1.08%)<br>0.0000 -0.0010 0.5548 0.1443 -0.0067<br>-0.0220 0.2707 0.0219 -0.0245 0.6079<br>0.3992 0.0091 -0.1868 -0.1479 -0.0129<br>0.0305 0.0453 -0.0857 0.0169                                   |
| 195. | (0.00022) | RY*( 4) | C | 10 | s( 31.16%)p 1.68( 52.28%)d 0.53( 16.56%)<br>0.0000 -0.0014 0.5554 -0.0347 0.0444<br>0.0124 -0.3512 0.5496 0.0024 -0.2191<br>-0.1832 0.0001 0.0043 0.1251 -0.2752<br>0.2137 0.1626 0.1193 -0.0598                                   |
| 196. | (0.00013) | RY*( 5) | C | 10 | s( 2.50%)p15.22( 38.09%)d23.74( 59.41%)<br>0.0000 -0.0016 0.1335 -0.0837 0.0147<br>-0.0039 0.0445 -0.3926 -0.0019 -0.2833<br>-0.0346 0.0066 -0.3773 -0.0298 0.2124<br>0.3448 0.5145 -0.2354 -0.3316                                |
| 197. | (0.00009) | RY*( 6) | C | 10 | s( 33.85%)p 1.60( 54.13%)d 0.36( 12.03%)                                                                                                                                                                                           |
| 198. | (0.00005) | RY*( 7) | C | 10 | s( 20.21%)p 3.10( 62.68%)d 0.85( 17.12%)                                                                                                                                                                                           |
| 199. | (0.00003) | RY*( 8) | C | 10 | s( 7.68%)p 2.48( 19.06%)d 9.54( 73.26%)                                                                                                                                                                                            |
| 200. | (0.00003) | RY*( 9) | C | 10 | s( 2.88%)p25.99( 74.77%)d 7.77( 22.36%)                                                                                                                                                                                            |
| 201. | (0.00001) | RY*(10) | C | 10 | s( 0.13%)p99.99( 13.18%)d99.99( 86.69%)                                                                                                                                                                                            |
| 202. | (0.00002) | RY*(11) | C | 10 | s( 63.12%)p 0.55( 34.94%)d 0.03( 1.93%)                                                                                                                                                                                            |
| 203. | (0.00001) | RY*(12) | C | 10 | s( 2.50%)p 5.59( 13.98%)d33.39( 83.52%)                                                                                                                                                                                            |
| 204. | (0.00000) | RY*(13) | C | 10 | s( 98.72%)p 0.01( 0.71%)d 0.01( 0.56%)                                                                                                                                                                                             |
| 205. | (0.00000) | RY*(14) | C | 10 | s( 2.41%)p 3.43( 8.24%)d37.14( 89.35%)                                                                                                                                                                                             |
| 206. | (0.00346) | RY*( 1) | B | 11 | s( 11.83%)p 7.36( 87.09%)d 0.09( 1.07%)<br>0.0000 -0.0058 0.2570 -0.2273 -0.0246<br>0.0248 -0.7795 -0.3396 0.0000 -0.2896<br>-0.0731 0.0042 0.2397 0.0268 -0.0890<br>0.0410 0.0184 0.0223 -0.0176                                  |
| 207. | (0.00204) | RY*( 2) | B | 11 | s( 27.74%)p 2.17( 60.32%)d 0.43( 11.93%)<br>0.0000 -0.0023 0.4497 0.2717 -0.0370<br>0.0074 0.1782 -0.2070 0.0039 -0.5236<br>0.2889 -0.0035 -0.3731 0.1781 0.2968<br>-0.1256 -0.0329 0.0766 0.0922                                  |
| 208. | (0.00147) | RY*( 3) | B | 11 | s( 46.57%)p 0.99( 45.99%)d 0.16( 7.45%)<br>0.0000 -0.0037 0.6773 0.0820 -0.0119<br>-0.0028 -0.0310 -0.0612 0.0178 0.6183<br>-0.0967 0.0030 -0.2269 0.1081 -0.2636<br>0.0129 -0.0102 -0.0637 -0.0256                                |
| 209. | (0.00103) | RY*( 4) | B | 11 | s( 14.00%)p 5.07( 71.07%)d 1.07( 14.92%)<br>0.0000 0.0009 0.3711 0.0335 -0.0347<br>0.0040 0.2565 0.0753 0.0006 0.0197<br>0.0996 0.0008 0.7661 -0.2050 0.1568<br>-0.3481 -0.0380 0.0401 0.0209                                      |
| 210. | (0.00075) | RY*( 5) | B | 11 | s( 51.76%)p 0.64( 33.35%)d 0.29( 14.89%)<br>0.0000 -0.0184 -0.3023 0.6513 0.0411                                                                                                                                                   |

|      |           |         |   |    |            |                 |                 |         |         |
|------|-----------|---------|---|----|------------|-----------------|-----------------|---------|---------|
|      |           |         |   |    | -0.0009    | -0.2501         | -0.3709         | 0.0028  | 0.3178  |
|      |           |         |   |    | -0.0546    | 0.0075          | 0.0985          | 0.1399  | 0.2395  |
|      |           |         |   |    | -0.2593    | -0.0798         | 0.0763          | 0.1102  |         |
| 211. | (0.00049) | RY*( 6) | B | 11 | s( 2.47%)  | p33.87( 83.55%) | d 5.67( 13.99%) |         |         |
|      |           |         |   |    | 0.0000     | 0.0123          | -0.0764         | 0.1318  | -0.0362 |
|      |           |         |   |    | 0.0040     | -0.2765         | 0.3574          | -0.0031 | 0.0802  |
|      |           |         |   |    | 0.7827     | 0.0124          | 0.0279          | 0.1060  | -0.3144 |
|      |           |         |   |    | -0.1097    | 0.1361          | 0.0445          | 0.0920  |         |
| 212. | (0.00035) | RY*( 7) | B | 11 | s( 12.07%) | p 3.31( 40.01%) | d 3.97( 47.92%) |         |         |
|      |           |         |   |    | 0.0000     | 0.0046          | 0.1752          | 0.2890  | 0.0804  |
|      |           |         |   |    | 0.0059     | -0.2775         | 0.5208          | -0.0074 | 0.0115  |
|      |           |         |   |    | -0.1656    | -0.0194         | 0.0000          | -0.1543 | 0.4781  |
|      |           |         |   |    | 0.3308     | 0.3738          | -0.0039         | -0.0386 |         |
| 213. | (0.00024) | RY*( 8) | B | 11 | s( 15.61%) | p 3.25( 50.70%) | d 2.16( 33.69%) |         |         |
|      |           |         |   |    | 0.0000     | -0.0041         | 0.0072          | 0.2799  | -0.2788 |
|      |           |         |   |    | -0.0042    | 0.1102          | -0.3454         | -0.0156 | 0.0021  |
|      |           |         |   |    | 0.2300     | -0.0100         | 0.0676          | -0.5637 | -0.1647 |
|      |           |         |   |    | 0.5445     | -0.0084         | 0.0676          | -0.0932 |         |
| 214. | (0.00016) | RY*( 9) | B | 11 | s( 17.89%) | p 1.22( 21.79%) | d 3.37( 60.32%) |         |         |
|      |           |         |   |    | 0.0000     | 0.0150          | 0.0337          | 0.4202  | -0.0321 |
|      |           |         |   |    | 0.0036     | -0.0671         | 0.2552          | -0.0145 | -0.3055 |
|      |           |         |   |    | -0.2224    | 0.0073          | 0.0270          | -0.0666 | -0.3581 |
|      |           |         |   |    | -0.0968    | -0.3311         | -0.5836         | -0.1239 |         |
| 215. | (0.00012) | RY*(10) | B | 11 | s( 7.35%)  | p 7.25( 53.26%) | d 5.36( 39.40%) |         |         |
|      |           |         |   |    | 0.0000     | 0.0016          | 0.0054          | 0.2455  | -0.1146 |
|      |           |         |   |    | 0.0034     | 0.1932          | 0.0099          | 0.0110  | -0.1715 |
|      |           |         |   |    | -0.1936    | -0.0104         | 0.2937          | 0.5846  | -0.3276 |
|      |           |         |   |    | 0.2678     | 0.2879          | 0.3093          | -0.1907 |         |
| 216. | (0.00009) | RY*(11) | B | 11 | s( 4.46%)  | p 3.01( 13.43%) | d18.43( 82.11%) |         |         |
| 217. | (0.00007) | RY*(12) | B | 11 | s( 83.49%) | p 0.05( 3.92%)  | d 0.15( 12.59%) |         |         |
| 218. | (0.00004) | RY*(13) | B | 11 | s( 3.84%)  | p 8.39( 32.18%) | d16.68( 63.98%) |         |         |
| 219. | (0.00004) | RY*(14) | B | 11 | s( 1.02%)  | p 3.43( 3.49%)  | d93.87( 95.49%) |         |         |
| 220. | (0.00478) | RY*( 1) | C | 12 | s( 7.30%)  | p11.43( 83.47%) | d 1.27( 9.24%)  |         |         |
|      |           |         |   |    | 0.0000     | 0.0187          | 0.2678          | 0.0305  | -0.0001 |
|      |           |         |   |    | 0.0331     | 0.9062          | -0.0561         | 0.0218  | -0.0734 |
|      |           |         |   |    | -0.0211    | -0.0102         | -0.0187         | -0.0498 | 0.1015  |
|      |           |         |   |    | -0.0607    | 0.0933          | -0.2162         | 0.1514  |         |
| 221. | (0.00303) | RY*( 2) | C | 12 | s( 15.51%) | p 3.18( 49.39%) | d 2.26( 35.10%) |         |         |
|      |           |         |   |    | 0.0000     | -0.0109         | 0.3578          | -0.1642 | 0.0036  |
|      |           |         |   |    | -0.0055    | -0.2169         | 0.0473          | 0.0333  | -0.3585 |
|      |           |         |   |    | -0.1380    | -0.0230         | 0.4832          | -0.2488 | 0.4840  |
|      |           |         |   |    | -0.2454    | -0.0967         | 0.0536          | 0.2105  |         |
| 222. | (0.00209) | RY*( 3) | C | 12 | s( 35.27%) | p 1.64( 58.01%) | d 0.19( 6.71%)  |         |         |
|      |           |         |   |    | 0.0000     | -0.0069         | 0.5778          | -0.1374 | -0.0012 |
|      |           |         |   |    | 0.0137     | -0.1118         | 0.2574          | 0.0033  | -0.3932 |
|      |           |         |   |    | 0.2261     | 0.0147          | -0.5247         | 0.1410  | -0.1966 |
|      |           |         |   |    | 0.0208     | -0.0954         | 0.1369          | -0.0142 |         |
| 223. | (0.00185) | RY*( 4) | C | 12 | s( 17.83%) | p 2.85( 50.75%) | d 1.76( 31.42%) |         |         |
|      |           |         |   |    | 0.0000     | -0.0012         | 0.4077          | -0.1097 | -0.0006 |
|      |           |         |   |    | 0.0172     | -0.0391         | 0.2485          | -0.0090 | 0.4621  |
|      |           |         |   |    | -0.3761    | 0.0237          | -0.0070         | -0.2970 | 0.0555  |
|      |           |         |   |    | 0.3230     | -0.0854         | -0.1778         | -0.4098 |         |
| 224. | (0.00146) | RY*( 5) | C | 12 | s( 12.10%) | p 6.22( 75.33%) | d 1.04( 12.57%) |         |         |
|      |           |         |   |    | 0.0000     | -0.0003         | 0.3386          | -0.0798 | -0.0020 |
|      |           |         |   |    | 0.0139     | 0.0120          | 0.0964          | -0.0284 | 0.5285  |
|      |           |         |   |    | 0.4380     | -0.0290         | 0.4225          | 0.3040  | -0.1798 |
|      |           |         |   |    | -0.0569    | -0.0017         | 0.1953          | 0.2279  |         |
| 225. | (0.00092) | RY*( 6) | C | 12 | s( 0.04%)  | p99.99( 20.61%) | d99.99( 79.35%) |         |         |
|      |           |         |   |    | 0.0000     | -0.0001         | 0.0050          | 0.0195  | -0.0029 |
|      |           |         |   |    | 0.0009     | 0.0231          | 0.0200          | -0.0129 | -0.1809 |
|      |           |         |   |    | 0.2632     | -0.0100         | 0.2699          | 0.1734  | -0.1167 |
|      |           |         |   |    | -0.3749    | -0.1677         | -0.4140         | -0.6632 |         |
| 226. | (0.00056) | RY*( 7) | C | 12 | s( 0.25%)  | p99.99( 55.27%) | d99.99( 44.48%) |         |         |
|      |           |         |   |    | 0.0000     | -0.0013         | 0.0020          | 0.0497  | -0.0014 |
|      |           |         |   |    | 0.0040     | 0.0706          | -0.0856         | 0.0030  | -0.3155 |
|      |           |         |   |    | 0.3265     | 0.0026          | 0.3448          | -0.4641 | -0.3332 |
|      |           |         |   |    | 0.5155     | 0.1614          | 0.1549          | -0.1344 |         |
| 227. | (0.00045) | RY*( 8) | C | 12 | s( 74.61%) | p 0.32( 23.95%) | d 0.02( 1.44%)  |         |         |
|      |           |         |   |    | 0.0000     | 0.0005          | 0.0326          | 0.8632  | 0.0018  |
|      |           |         |   |    | 0.0114     | -0.0061         | 0.4828          | 0.0033  | -0.0320 |
|      |           |         |   |    | -0.0145    | -0.0013         | 0.0631          | -0.0315 | 0.0521  |



|      |           |         |   |    |                                          |
|------|-----------|---------|---|----|------------------------------------------|
| 228. | (0.00016) | RY*( 9) | C | 12 | -0.0458 -0.0478 0.0742 0.0428            |
|      |           |         |   |    | s( 25.43%)p 1.45( 36.78%)d 1.49( 37.79%) |
|      |           |         |   |    | 0.0000 -0.0175 0.3761 0.3344 0.0282      |
|      |           |         |   |    | 0.0092 -0.2945 -0.5087 -0.0007 0.0013    |
|      |           |         |   |    | -0.0632 0.0018 -0.0207 0.1333 -0.0454    |
|      |           |         |   |    | 0.0653 0.4575 -0.3930 0.0885             |
| 229. | (0.00008) | RY*(10) | C | 12 | s( 9.13%)p 3.87( 35.30%)d 6.08( 55.56%)  |
| 230. | (0.00007) | RY*(11) | C | 12 | s( 0.54%)p46.70( 25.00%)d99.99( 74.46%)  |
| 231. | (0.00005) | RY*(12) | C | 12 | s( 0.55%)p99.99( 66.02%)d60.45( 33.42%)  |
| 232. | (0.00003) | RY*(13) | C | 12 | s( 4.96%)p 4.05( 20.09%)d15.10( 74.95%)  |
| 233. | (0.00000) | RY*(14) | C | 12 | s( 96.45%)p 0.00( 0.35%)d 0.03( 3.20%)   |
| 234. | (0.00409) | RY*( 1) | N | 13 | s( 15.53%)p 4.99( 77.45%)d 0.45( 7.03%)  |
|      |           |         |   |    | 0.0000 -0.0086 0.3939 -0.0005 -0.0006    |
|      |           |         |   |    | 0.0032 -0.0022 -0.0481 0.0088 -0.1283    |
|      |           |         |   |    | 0.0572 0.0084 -0.8673 -0.0124 -0.1753    |
|      |           |         |   |    | -0.0700 -0.0923 0.1530 -0.0521           |
| 235. | (0.00366) | RY*( 2) | N | 13 | s( 0.47%)p99.99( 92.20%)d15.43( 7.32%)   |
|      |           |         |   |    | 0.0000 -0.0070 0.0678 -0.0098 0.0008     |
|      |           |         |   |    | 0.0039 -0.2112 -0.0354 0.0082 -0.9039    |
|      |           |         |   |    | 0.0051 0.0038 0.2269 0.0863 -0.0043      |
|      |           |         |   |    | -0.1537 -0.1291 0.1641 -0.0775           |
| 236. | (0.00184) | RY*( 3) | N | 13 | s( 2.58%)p30.69( 79.23%)d 7.05( 18.19%)  |
|      |           |         |   |    | 0.0000 0.0035 0.1315 0.0923 -0.0005      |
|      |           |         |   |    | -0.0008 -0.8516 -0.0049 0.0017 0.2567    |
|      |           |         |   |    | 0.0219 0.0029 0.0236 -0.0035 0.2578      |
|      |           |         |   |    | 0.1666 -0.1560 0.2385 -0.0803            |
| 237. | (0.00084) | RY*( 4) | N | 13 | s( 75.40%)p 0.24( 17.90%)d 0.09( 6.71%)  |
|      |           |         |   |    | 0.0000 0.0074 0.8577 0.1353 -0.0024      |
|      |           |         |   |    | -0.0019 0.1808 -0.0432 0.0036 0.0743     |
|      |           |         |   |    | 0.0176 0.0001 0.3719 -0.0160 -0.0783     |
|      |           |         |   |    | 0.1986 -0.0414 -0.1099 -0.0878           |
| 238. | (0.00061) | RY*( 5) | N | 13 | s( 5.14%)p 1.52( 7.81%)d16.93( 87.05%)   |
|      |           |         |   |    | 0.0000 0.0013 0.2266 0.0079 0.0017       |
|      |           |         |   |    | 0.0001 0.0684 0.0268 -0.0039 0.0548      |
|      |           |         |   |    | -0.1565 0.0053 -0.0124 0.2122 0.5227     |
|      |           |         |   |    | -0.4895 0.0357 0.0759 0.5921             |
| 239. | (0.00045) | RY*( 6) | N | 13 | s( 0.20%)p26.19( 5.20%)d99.99( 94.60%)   |
|      |           |         |   |    | 0.0000 0.0002 0.0190 0.0403 -0.0001      |
|      |           |         |   |    | 0.0012 0.0149 -0.0247 0.0035 0.0617      |
|      |           |         |   |    | 0.1276 -0.0046 -0.0364 -0.1725 0.3576    |
|      |           |         |   |    | -0.5038 -0.2130 -0.4209 -0.5847          |
| 240. | (0.00021) | RY*( 7) | N | 13 | s( 8.62%)p 2.08( 17.91%)d 8.52( 73.47%)  |
|      |           |         |   |    | 0.0000 -0.0054 -0.0989 0.2762 0.0105     |
|      |           |         |   |    | 0.0264 0.3287 -0.0844 -0.0103 -0.1653    |
|      |           |         |   |    | -0.1053 -0.0118 -0.1478 -0.0518 0.6355   |
|      |           |         |   |    | 0.5270 -0.0886 0.1619 -0.1378            |
| 241. | (0.00013) | RY*( 8) | N | 13 | s( 0.31%)p63.70( 19.76%)d99.99( 79.93%)  |
|      |           |         |   |    | 0.0000 -0.0087 0.0521 0.0029 0.0173      |
|      |           |         |   |    | -0.0111 -0.2781 -0.2161 -0.0066 -0.2134  |
|      |           |         |   |    | -0.0331 -0.0033 -0.1579 -0.0433 0.1193   |
|      |           |         |   |    | 0.2175 0.5145 -0.6655 0.1738             |
| 242. | (0.00011) | RY*( 9) | N | 13 | s( 6.87%)p12.97( 89.12%)d 0.58( 4.01%)   |
|      |           |         |   |    | 0.0000 -0.0017 -0.0077 0.2614 -0.0166    |
|      |           |         |   |    | 0.0063 -0.0121 0.7259 0.0050 -0.0613     |
|      |           |         |   |    | 0.4736 0.0016 -0.0601 0.3638 0.0421      |
|      |           |         |   |    | 0.0939 0.0459 -0.1636 0.0260             |
| 243. | (0.00009) | RY*(10) | N | 13 | s( 68.16%)p 0.32( 21.68%)d 0.15( 10.17%) |
| 244. | (0.00005) | RY*(11) | N | 13 | s( 15.65%)p 5.12( 80.10%)d 0.27( 4.25%)  |
| 245. | (0.00002) | RY*(12) | N | 13 | s( 2.15%)p 1.80( 3.88%)d43.70( 93.97%)   |
| 246. | (0.00001) | RY*(13) | N | 13 | s( 0.34%)p99.99( 87.73%)d34.74( 11.93%)  |
| 247. | (0.00000) | RY*(14) | N | 13 | s( 98.65%)p 0.00( 0.13%)d 0.01( 1.23%)   |
| 248. | (0.00396) | RY*( 1) | C | 14 | s( 1.08%)p74.34( 79.97%)d17.62( 18.95%)  |
|      |           |         |   |    | 0.0000 -0.0015 0.1019 -0.0187 0.0049     |
|      |           |         |   |    | 0.0080 0.1653 -0.0150 -0.0210 -0.7036    |
|      |           |         |   |    | 0.1019 0.0287 0.4928 -0.1501 -0.2797     |
|      |           |         |   |    | 0.2766 0.0537 0.1574 0.0845              |
| 249. | (0.00302) | RY*( 2) | C | 14 | s( 5.56%)p15.14( 84.13%)d 1.86( 10.32%)  |
|      |           |         |   |    | 0.0000 -0.0043 0.2353 0.0117 0.0065      |
|      |           |         |   |    | 0.0224 0.3249 0.0399 0.0126 -0.4355      |
|      |           |         |   |    | -0.1825 -0.0021 -0.7070 -0.1027 -0.1423  |
|      |           |         |   |    | -0.2678 -0.0824 0.0601 -0.0284           |

|      |           |         |   |    |                                                                                                                                                                                                      |
|------|-----------|---------|---|----|------------------------------------------------------------------------------------------------------------------------------------------------------------------------------------------------------|
| 250. | (0.00133) | RY*( 3) | C | 14 | s( 13.92%)p 5.73( 79.71%)d 0.46( 6.38%)<br>0.0000 -0.0010 0.3730 -0.0012 0.0058<br>-0.0304 0.6761 0.2577 -0.0262 0.3954<br>0.2038 -0.0181 0.2370 0.1327 -0.1824<br>-0.1646 -0.0070 0.0574 0.0082     |
| 251. | (0.00055) | RY*( 4) | C | 14 | s( 66.04%)p 0.29( 18.90%)d 0.23( 15.06%)<br>0.0000 0.0024 0.8081 0.0848 0.0134<br>-0.0040 -0.3972 0.1299 0.0136 0.0158<br>0.0663 0.0141 -0.0844 0.0470 0.1582<br>0.2533 0.0366 -0.0522 0.2393        |
| 252. | (0.00046) | RY*( 5) | C | 14 | s( 4.31%)p 2.22( 9.58%)d19.97( 86.10%)<br>0.0000 0.0010 0.2065 0.0215 0.0023<br>-0.0020 -0.0559 0.0220 0.0048 -0.2043<br>0.0753 0.0015 0.2114 -0.0105 0.1904<br>-0.2443 -0.1695 -0.5064 -0.6928      |
| 253. | (0.00015) | RY*( 6) | C | 14 | s( 24.02%)p 2.32( 55.64%)d 0.85( 20.34%)<br>0.0000 0.0140 -0.2968 0.3842 -0.0656<br>0.0138 0.1112 0.6819 0.0005 -0.1390<br>0.1927 -0.0026 -0.1457 0.0345 0.1823<br>0.2665 0.0579 -0.2905 0.1071      |
| 254. | (0.00013) | RY*( 7) | C | 14 | s( 11.38%)p 6.27( 71.38%)d 1.52( 17.24%)<br>0.0000 0.0094 0.0795 0.3229 -0.0563<br>-0.0097 0.1763 0.0389 -0.0186 0.1600<br>-0.6227 -0.0149 0.1612 -0.4910 0.2429<br>0.2036 -0.1961 0.1502 -0.1046    |
| 255. | (0.00007) | RY*( 8) | C | 14 | s( 8.12%)p 5.40( 43.79%)d 5.93( 48.09%)                                                                                                                                                              |
| 256. | (0.00005) | RY*( 9) | C | 14 | s( 9.30%)p 1.21( 11.24%)d 8.54( 79.46%)                                                                                                                                                              |
| 257. | (0.00003) | RY*(10) | C | 14 | s( 0.07%)p99.99( 94.38%)d81.97( 5.55%)                                                                                                                                                               |
| 258. | (0.00003) | RY*(11) | C | 14 | s( 56.19%)p 0.19( 10.47%)d 0.59( 33.35%)                                                                                                                                                             |
| 259. | (0.00001) | RY*(12) | C | 14 | s( 0.22%)p69.30( 15.32%)d99.99( 84.46%)                                                                                                                                                              |
| 260. | (0.00001) | RY*(13) | C | 14 | s( 1.59%)p15.52( 24.62%)d46.51( 73.79%)                                                                                                                                                              |
| 261. | (0.00000) | RY*(14) | C | 14 | s( 98.27%)p 0.01( 1.03%)d 0.01( 0.70%)                                                                                                                                                               |
| 262. | (0.00456) | RY*( 1) | C | 15 | s( 0.06%)p99.99( 84.74%)d99.99( 15.20%)<br>0.0000 -0.0001 0.0248 0.0019 0.0009<br>0.0008 -0.1178 0.0332 0.0238 0.6525<br>-0.1038 -0.0310 -0.6161 0.1216 0.2592<br>-0.2664 -0.0195 -0.0053 0.1160     |
| 263. | (0.00292) | RY*( 2) | C | 15 | s( 5.57%)p15.13( 84.28%)d 1.82( 10.15%)<br>0.0000 -0.0049 0.2353 0.0167 0.0054<br>0.0228 0.3157 0.0379 -0.0051 0.5972<br>0.1973 -0.0049 0.5664 0.1571 0.2121<br>0.2196 -0.0597 0.0363 -0.0583        |
| 264. | (0.00130) | RY*( 3) | C | 15 | s( 15.32%)p 5.11( 78.29%)d 0.42( 6.38%)<br>0.0000 -0.0006 0.3913 -0.0039 0.0090<br>-0.0339 0.6853 0.2913 0.0199 -0.2444<br>-0.1747 0.0200 -0.3195 -0.1847 0.2232<br>0.1170 0.0058 0.0029 0.0158      |
| 265. | (0.00054) | RY*( 4) | C | 15 | s( 69.32%)p 0.28( 19.45%)d 0.16( 11.23%)<br>0.0000 0.0026 0.8290 0.0757 0.0118<br>-0.0005 -0.4137 0.0962 -0.0162 -0.0467<br>-0.0131 -0.0134 0.0991 -0.0384 -0.1841<br>-0.1652 -0.0159 -0.0603 0.2173 |
| 266. | (0.00044) | RY*( 5) | C | 15 | s( 1.70%)p 4.50( 7.63%)d53.46( 90.67%)<br>0.0000 0.0013 0.1216 0.0463 0.0051<br>0.0002 -0.0668 0.0911 -0.0037 0.1521<br>-0.0787 0.0013 -0.1844 0.0145 -0.3401<br>0.2432 -0.0739 -0.3993 -0.7530      |
| 267. | (0.00017) | RY*( 6) | C | 15 | s( 22.40%)p 2.49( 55.88%)d 0.97( 21.72%)<br>0.0000 0.0143 -0.2673 0.3830 -0.0754<br>0.0133 0.0740 0.7191 0.0041 0.1256<br>-0.0150 0.0002 0.1333 -0.0465 -0.3171<br>-0.2006 0.0784 -0.1616 0.2101     |
| 268. | (0.00012) | RY*( 7) | C | 15 | s( 6.83%)p 9.96( 68.07%)d 3.67( 25.10%)<br>0.0000 0.0083 0.0901 0.2390 -0.0550<br>-0.0162 0.2424 -0.0900 0.0166 -0.1565<br>0.5516 0.0189 -0.1921 0.4972 -0.2235<br>-0.2898 -0.2461 0.2080 -0.1150    |
| 269. | (0.00005) | RY*( 8) | C | 15 | s( 12.72%)p 1.12( 14.29%)d 5.74( 72.99%)                                                                                                                                                             |
| 270. | (0.00006) | RY*( 9) | C | 15 | s( 11.75%)p 4.17( 48.97%)d 3.34( 39.28%)                                                                                                                                                             |
| 271. | (0.00002) | RY*(10) | C | 15 | s( 0.83%)p99.99( 98.49%)d 0.81( 0.68%)                                                                                                                                                               |
| 272. | (0.00002) | RY*(11) | C | 15 | s( 18.75%)p 0.65( 12.21%)d 3.68( 69.04%)                                                                                                                                                             |

|      |           |         |   |    |                                                                                                                                                                                                         |
|------|-----------|---------|---|----|---------------------------------------------------------------------------------------------------------------------------------------------------------------------------------------------------------|
| 273. | (0.00001) | RY*(12) | C | 15 | s( 31.58%)p 0.54( 17.09%)d 1.62( 51.32%)                                                                                                                                                                |
| 274. | (0.00000) | RY*(13) | C | 15 | s( 5.95%)p 1.62( 9.67%)d14.17( 84.38%)                                                                                                                                                                  |
| 275. | (0.00000) | RY*(14) | C | 15 | s( 97.25%)p 0.01( 1.08%)d 0.02( 1.67%)                                                                                                                                                                  |
| 276. | (0.00393) | RY*( 1) | N | 16 | s( 13.65%)p 5.54( 75.59%)d 0.79( 10.76%)<br>0.0000 -0.0097 0.3692 0.0083 -0.0001<br>0.0042 -0.1302 -0.0464 -0.0065 0.2987<br>-0.0685 -0.0126 0.8012 -0.0271 0.1958<br>0.1302 -0.1394 0.1617 -0.0819     |
| 277. | (0.00325) | RY*( 2) | N | 16 | s( 0.19%)p99.99( 96.72%)d16.38( 3.09%)<br>0.0000 0.0056 -0.0147 0.0405 0.0005<br>-0.0044 0.0057 0.0023 0.0105 -0.8946<br>-0.0046 -0.0034 0.3997 0.0828 -0.0549<br>-0.1341 0.0134 -0.0496 0.0852         |
| 278. | (0.00201) | RY*( 3) | N | 16 | s( 0.29%)p99.99( 81.69%)d63.13( 18.02%)<br>0.0000 0.0004 -0.0370 0.0385 -0.0008<br>-0.0005 -0.8902 -0.0028 -0.0025 -0.0601<br>-0.0189 -0.0016 -0.1430 -0.0076 -0.1057<br>-0.2228 -0.1766 0.2452 -0.1675 |
| 279. | (0.00068) | RY*( 4) | N | 16 | s( 28.65%)p 0.41( 11.72%)d 2.08( 59.63%)<br>0.0000 0.0063 0.5241 0.1084 -0.0030<br>0.0019 0.0111 -0.0040 -0.0014 -0.1371<br>0.1540 -0.0028 -0.2163 -0.1664 -0.2969<br>0.3673 -0.0123 0.4374 0.4264      |
| 280. | (0.00054) | RY*( 5) | N | 16 | s( 52.19%)p 0.23( 12.15%)d 0.68( 35.66%)<br>0.0000 0.0071 0.7028 0.1670 -0.0041<br>-0.0078 -0.0001 -0.0008 -0.0072 -0.1098<br>-0.1257 -0.0046 -0.2923 0.0896 0.3203<br>-0.2230 -0.1041 -0.3958 -0.1918  |
| 281. | (0.00042) | RY*( 6) | N | 16 | s( 0.75%)p 6.18( 4.64%)d99.99( 94.61%)<br>0.0000 0.0002 0.0786 0.0365 0.0023<br>0.0016 -0.0077 -0.0141 -0.0037 -0.0614<br>-0.1451 0.0010 0.0195 0.1447 -0.5513<br>0.4886 0.0421 -0.2055 -0.5995         |
| 282. | (0.00017) | RY*( 7) | N | 16 | s( 11.84%)p 1.61( 19.04%)d 5.84( 69.12%)<br>0.0000 -0.0013 0.0594 0.3388 0.0094<br>0.0234 0.3319 -0.1047 0.0134 0.1518<br>0.0289 0.0079 0.0689 0.1997 -0.4549<br>-0.5855 -0.2364 0.2696 -0.1133         |
| 283. | (0.00013) | RY*( 8) | N | 16 | s( 2.34%)p23.55( 55.08%)d18.21( 42.58%)<br>0.0000 -0.0028 0.0455 0.1433 0.0276<br>-0.0146 -0.2461 -0.5000 0.0077 0.1565<br>0.2764 0.0073 0.1080 0.3569 -0.1835<br>-0.0171 0.3474 -0.3871 0.3483         |
| 284. | (0.00012) | RY*( 9) | N | 16 | s( 0.97%)p56.19( 54.25%)d46.38( 44.78%)<br>0.0000 -0.0076 0.0880 0.0430 -0.0009<br>0.0023 -0.1182 0.4777 0.0009 0.1390<br>-0.3792 -0.0003 0.1409 -0.3427 -0.3652<br>-0.2334 0.3037 -0.3036 0.2749       |
| 285. | (0.00008) | RY*(10) | N | 16 | s( 63.06%)p 0.42( 26.70%)d 0.16( 10.24%)                                                                                                                                                                |
| 286. | (0.00005) | RY*(11) | N | 16 | s( 23.91%)p 2.98( 71.38%)d 0.20( 4.71%)                                                                                                                                                                 |
| 287. | (0.00001) | RY*(12) | N | 16 | s( 0.83%)p99.99( 86.50%)d15.27( 12.67%)                                                                                                                                                                 |
| 288. | (0.00002) | RY*(13) | N | 16 | s( 3.19%)p 1.36( 4.34%)d29.00( 92.48%)                                                                                                                                                                  |
| 289. | (0.00000) | RY*(14) | N | 16 | s( 98.20%)p 0.00( 0.28%)d 0.02( 1.52%)                                                                                                                                                                  |
| 290. | (0.00170) | RY*( 1) | C | 17 | s( 0.35%)p99.99( 68.28%)d89.00( 31.37%)<br>0.0000 -0.0013 0.0439 -0.0399 0.0028<br>-0.0024 0.0907 -0.0565 -0.0086 -0.4943<br>0.1221 0.0176 0.6155 -0.1810 0.0675<br>-0.1781 -0.1329 -0.2627 -0.4368     |
| 291. | (0.00162) | RY*( 2) | C | 17 | s( 1.01%)p85.75( 86.70%)d12.16( 12.29%)<br>0.0000 0.0020 0.0783 0.0630 -0.0016<br>-0.0090 -0.8656 -0.1723 0.0046 0.1535<br>-0.0881 0.0111 0.2309 -0.0560 0.2347<br>0.1610 -0.1031 0.1503 -0.0932        |
| 292. | (0.00084) | RY*( 3) | C | 17 | s( 37.13%)p 1.68( 62.43%)d 0.01( 0.44%)<br>0.0000 -0.0027 0.6050 0.0723 -0.0065<br>0.0099 -0.1096 -0.0669 0.0278 -0.5391<br>-0.2680 0.0190 -0.4451 -0.2146 -0.0401<br>-0.0124 -0.0327 0.0174 0.0355     |
| 293. | (0.00024) | RY*( 4) | C | 17 | s( 27.05%)p 1.63( 43.96%)d 1.07( 28.98%)<br>0.0000 0.0025 0.5114 0.0906 0.0284<br>0.0033 0.1506 0.0130 -0.0106 0.6244                                                                                   |

|      |           |         |   |    |            |                 |                 |         |         |
|------|-----------|---------|---|----|------------|-----------------|-----------------|---------|---------|
|      |           |         |   |    | -0.0322    | -0.0024         | 0.0039          | -0.1604 | -0.0290 |
|      |           |         |   |    | -0.3675    | -0.1493         | -0.0308         | -0.3615 |         |
| 294. | (0.00014) | RY*( 5) | C | 17 | s( 15.69%) | p 2.40( 37.61%) | d 2.97( 46.69%) |         |         |
|      |           |         |   |    | 0.0000     | -0.0037         | 0.3886          | -0.0537 | 0.0551  |
|      |           |         |   |    | -0.0019    | 0.2020          | -0.2770         | -0.0058 | -0.0180 |
|      |           |         |   |    | 0.0689     | -0.0074         | 0.4719          | 0.1752  | -0.2348 |
|      |           |         |   |    | 0.1233     | 0.0016          | 0.5211          | 0.3536  |         |
| 295. | (0.00009) | RY*( 6) | C | 17 | s( 2.05%)  | p41.01( 83.93%) | d 6.85( 14.02%) |         |         |
| 296. | (0.00006) | RY*( 7) | C | 17 | s( 22.62%) | p 2.89( 65.32%) | d 0.53( 12.06%) |         |         |
| 297. | (0.00004) | RY*( 8) | C | 17 | s( 2.83%)  | p27.64( 78.36%) | d 6.63( 18.80%) |         |         |
| 298. | (0.00003) | RY*( 9) | C | 17 | s( 5.39%)  | p 2.89( 15.58%) | d14.67( 79.03%) |         |         |
| 299. | (0.00001) | RY*(10) | C | 17 | s( 0.82%)  | p 8.09( 6.62%)  | d99.99( 92.56%) |         |         |
| 300. | (0.00002) | RY*(11) | C | 17 | s( 73.77%) | p 0.32( 23.32%) | d 0.04( 2.92%)  |         |         |
| 301. | (0.00000) | RY*(12) | C | 17 | s( 98.40%) | p 0.01( 0.86%)  | d 0.01( 0.74%)  |         |         |
| 302. | (0.00001) | RY*(13) | C | 17 | s( 9.67%)  | p 2.36( 22.81%) | d 6.98( 67.52%) |         |         |
| 303. | (0.00001) | RY*(14) | C | 17 | s( 3.16%)  | p 1.41( 4.47%)  | d29.24( 92.37%) |         |         |
| 304. | (0.00206) | RY*( 1) | C | 18 | s( 0.57%)  | p99.99( 69.17%) | d53.45( 30.26%) |         |         |
|      |           |         |   |    | 0.0000     | -0.0013         | 0.0711          | -0.0245 | 0.0025  |
|      |           |         |   |    | -0.0054    | -0.0071         | -0.0092         | 0.0116  | 0.5858  |
|      |           |         |   |    | -0.1948    | -0.0145         | -0.5188         | 0.2025  | -0.1383 |
|      |           |         |   |    | 0.1114     | 0.0110          | -0.2093         | -0.4766 |         |
| 305. | (0.00169) | RY*( 2) | C | 18 | s( 1.10%)  | p78.90( 86.63%) | d11.18( 12.27%) |         |         |
|      |           |         |   |    | 0.0000     | 0.0030          | 0.0790          | 0.0687  | 0.0027  |
|      |           |         |   |    | -0.0097    | -0.8584         | -0.2086         | -0.0075 | -0.2188 |
|      |           |         |   |    | 0.0420     | -0.0119         | -0.1598         | 0.1019  | -0.1755 |
|      |           |         |   |    | -0.1944    | -0.1120         | 0.1688          | -0.1146 |         |
| 306. | (0.00084) | RY*( 3) | C | 18 | s( 31.75%) | p 2.13( 67.76%) | d 0.02( 0.49%)  |         |         |
|      |           |         |   |    | 0.0000     | -0.0019         | 0.5510          | 0.1178  | -0.0055 |
|      |           |         |   |    | 0.0141     | -0.1169         | -0.0003         | -0.0230 | 0.4309  |
|      |           |         |   |    | 0.2807     | -0.0216         | 0.5419          | 0.3233  | 0.0262  |
|      |           |         |   |    | 0.0205     | -0.0249         | -0.0280         | 0.0491  |         |
| 307. | (0.00018) | RY*( 4) | C | 18 | s( 24.75%) | p 2.46( 60.96%) | d 0.58( 14.29%) |         |         |
|      |           |         |   |    | 0.0000     | -0.0046         | 0.4665          | -0.1657 | 0.0491  |
|      |           |         |   |    | -0.0100    | 0.2383          | -0.5551         | 0.0036  | -0.2143 |
|      |           |         |   |    | -0.4181    | 0.0019          | -0.0833         | 0.1298  | 0.2264  |
|      |           |         |   |    | 0.0754     | -0.1592         | 0.2454          | -0.0206 |         |
| 308. | (0.00011) | RY*( 5) | C | 18 | s( 12.58%) | p 2.83( 35.56%) | d 4.12( 51.85%) |         |         |
|      |           |         |   |    | 0.0000     | 0.0047          | -0.1529         | 0.3197  | -0.0147 |
|      |           |         |   |    | -0.0028    | 0.1660          | -0.2455         | 0.0121  | -0.3610 |
|      |           |         |   |    | 0.2469     | 0.0082          | 0.2487          | 0.1199  | -0.0851 |
|      |           |         |   |    | 0.2403     | -0.0942         | -0.1910         | -0.6389 |         |
| 309. | (0.00007) | RY*( 6) | C | 18 | s( 6.27%)  | p11.30( 70.90%) | d 3.64( 22.82%) |         |         |
| 310. | (0.00005) | RY*( 7) | C | 18 | s( 10.77%) | p 4.21( 45.29%) | d 4.08( 43.93%) |         |         |
| 311. | (0.00003) | RY*( 8) | C | 18 | s( 16.49%) | p 3.96( 65.35%) | d 1.10( 18.16%) |         |         |
| 312. | (0.00001) | RY*( 9) | C | 18 | s( 18.70%) | p 1.62( 30.32%) | d 2.73( 50.98%) |         |         |
| 313. | (0.00002) | RY*(10) | C | 18 | s( 3.27%)  | p 2.81( 9.19%)  | d26.74( 87.54%) |         |         |
| 314. | (0.00001) | RY*(11) | C | 18 | s( 1.33%)  | p 5.68( 7.57%)  | d68.29( 91.10%) |         |         |
| 315. | (0.00002) | RY*(12) | C | 18 | s( 13.95%) | p 1.88( 26.26%) | d 4.29( 59.79%) |         |         |
| 316. | (0.00001) | RY*(13) | C | 18 | s( 60.69%) | p 0.40( 24.04%) | d 0.25( 15.27%) |         |         |
| 317. | (0.00000) | RY*(14) | C | 18 | s( 97.70%) | p 0.01( 1.27%)  | d 0.01( 1.03%)  |         |         |
| 318. | (0.00033) | RY*( 1) | H | 19 | s( 96.37%) | p 0.04( 3.63%)  |                 |         |         |
|      |           |         |   |    | 0.0005     | 0.9817          | -0.0018         | 0.0053  | 0.1849  |
|      |           |         |   |    | -0.0458    |                 |                 |         |         |
| 319. | (0.00027) | RY*( 2) | H | 19 | s( 0.04%)  | p99.99( 99.96%) |                 |         |         |
|      |           |         |   |    | 0.0000     | 0.0180          | -0.0053         | 0.0596  | -0.3305 |
|      |           |         |   |    | -0.9417    |                 |                 |         |         |
| 320. | (0.00017) | RY*( 3) | H | 19 | s( 78.75%) | p 0.27( 21.25%) |                 |         |         |
|      |           |         |   |    | 0.0019     | 0.0741          | 0.8843          | 0.2559  | -0.3577 |
|      |           |         |   |    | 0.1382     |                 |                 |         |         |
| 321. | (0.00015) | RY*( 4) | H | 19 | s( 23.65%) | p 3.23( 76.35%) |                 |         |         |
|      |           |         |   |    | -0.0007    | -0.1497         | 0.4627          | -0.3680 | 0.7384  |
|      |           |         |   |    | -0.2879    |                 |                 |         |         |
| 322. | (0.00004) | RY*( 5) | H | 19 | s( 1.26%)  | p78.22( 98.74%) |                 |         |         |
| 323. | (0.00047) | RY*( 1) | H | 20 | s( 97.72%) | p 0.02( 2.28%)  |                 |         |         |
|      |           |         |   |    | -0.0003    | 0.9885          | 0.0056          | -0.0864 | -0.1132 |
|      |           |         |   |    | 0.0503     |                 |                 |         |         |
| 324. | (0.00028) | RY*( 2) | H | 20 | s( 0.04%)  | p99.99( 99.96%) |                 |         |         |
|      |           |         |   |    | 0.0001     | 0.0142          | -0.0132         | 0.0604  | -0.3396 |
|      |           |         |   |    | -0.9384    |                 |                 |         |         |
| 325. | (0.00020) | RY*( 3) | H | 20 | s( 99.33%) | p 0.01( 0.67%)  |                 |         |         |
|      |           |         |   |    | 0.0014     | -0.0077         | 0.9966          | 0.0579  | -0.0573 |

|      |           |         |   |    |                                                                                      |
|------|-----------|---------|---|----|--------------------------------------------------------------------------------------|
| 326. | (0.00016) | RY*( 4) | H | 20 | 0.0104<br>s( 1.90%)p51.63( 98.10%)<br>0.0014 0.1365 -0.0195 0.8553 0.4852<br>-0.1182 |
| 327. | (0.00004) | RY*( 5) | H | 20 | s( 1.08%)p91.58( 98.92%)                                                             |
| 328. | (0.00036) | RY*( 1) | H | 21 | s( 98.22%)p 0.02( 1.78%)<br>-0.0001 0.9910 0.0052 0.0268 0.0961<br>0.0886            |
| 329. | (0.00029) | RY*( 2) | H | 21 | s( 0.07%)p99.99( 99.93%)<br>0.0003 -0.0025 0.0267 0.0814 -0.6746<br>0.7332           |
| 330. | (0.00017) | RY*( 3) | H | 21 | s( 97.77%)p 0.02( 2.23%)<br>0.0006 -0.0246 0.9885 0.0523 0.1212<br>0.0696            |
| 331. | (0.00016) | RY*( 4) | H | 21 | s( 3.33%)p29.06( 96.67%)<br>0.0013 0.1153 0.1413 -0.6345 -0.5843<br>-0.4719          |
| 332. | (0.00004) | RY*( 5) | H | 21 | s( 0.67%)p99.99( 99.33%)                                                             |
| 333. | (0.00034) | RY*( 1) | H | 22 | s( 94.32%)p 0.06( 5.68%)<br>0.0009 0.9712 -0.0025 0.0111 -0.0201<br>-0.2371          |
| 334. | (0.00030) | RY*( 2) | H | 22 | s( 2.30%)p42.55( 97.70%)<br>-0.0008 0.1513 0.0082 0.1478 -0.6964<br>0.6857           |
| 335. | (0.00017) | RY*( 3) | H | 22 | s( 93.12%)p 0.07( 6.88%)<br>0.0004 0.0409 0.9641 -0.1902 0.1162<br>0.1384            |
| 336. | (0.00016) | RY*( 4) | H | 22 | s( 9.22%)p 9.85( 90.78%)<br>-0.0015 -0.1477 0.2652 0.6616 -0.4212<br>-0.5410         |
| 337. | (0.00004) | RY*( 5) | H | 22 | s( 1.11%)p89.16( 98.89%)                                                             |
| 338. | (0.00051) | RY*( 1) | H | 23 | s( 81.87%)p 0.22( 18.13%)<br>-0.0022 0.9030 0.0575 -0.2460 -0.2866<br>-0.1965        |
| 339. | (0.00021) | RY*( 2) | H | 23 | s( 43.57%)p 1.30( 56.43%)<br>-0.0060 -0.3659 0.5493 -0.2129 -0.5128<br>-0.5060       |
| 340. | (0.00014) | RY*( 3) | H | 23 | s( 2.83%)p34.39( 97.17%)<br>0.0013 0.1158 0.1218 0.2910 0.6236<br>-0.7059            |
| 341. | (0.00010) | RY*( 4) | H | 23 | s( 67.82%)p 0.47( 32.18%)                                                            |
| 342. | (0.00002) | RY*( 5) | H | 23 | s( 3.97%)p24.18( 96.03%)                                                             |
| 343. | (0.00139) | RY*( 1) | H | 24 | s( 90.54%)p 0.10( 9.46%)<br>-0.0040 0.9515 0.0069 0.0073 -0.2867<br>-0.1111          |
| 344. | (0.00020) | RY*( 2) | H | 24 | s( 57.92%)p 0.73( 42.08%)<br>-0.0006 -0.0848 0.7563 -0.5535 -0.3200<br>0.1100        |
| 345. | (0.00015) | RY*( 3) | H | 24 | s( 7.66%)p12.05( 92.34%)<br>0.0006 0.2747 -0.0341 -0.3701 0.6817<br>0.5672           |
| 346. | (0.00009) | RY*( 4) | H | 24 | s( 43.68%)p 1.29( 56.32%)                                                            |
| 347. | (0.00003) | RY*( 5) | H | 24 | s( 0.24%)p99.99( 99.76%)                                                             |
| 348. | (0.00187) | RY*( 1) | H | 25 | s( 94.98%)p 0.05( 5.02%)<br>-0.0024 0.9746 0.0028 0.0684 -0.1890<br>-0.0989          |
| 349. | (0.00028) | RY*( 2) | H | 25 | s( 80.86%)p 0.24( 19.14%)<br>-0.0003 -0.0499 0.8978 -0.2207 -0.1404<br>-0.3506       |
| 350. | (0.00016) | RY*( 3) | H | 25 | s( 11.75%)p 7.51( 88.25%)<br>-0.0047 0.2128 0.2688 -0.2653 0.7255<br>0.5345          |
| 351. | (0.00010) | RY*( 4) | H | 25 | s( 12.07%)p 7.29( 87.93%)<br>0.0005 -0.0465 0.3443 0.6782 -0.2918<br>0.5781          |
| 352. | (0.00004) | RY*( 5) | H | 25 | s( 0.39%)p99.99( 99.61%)                                                             |
| 353. | (0.00084) | RY*( 1) | H | 26 | s( 90.48%)p 0.11( 9.52%)<br>-0.0028 0.9509 0.0257 -0.1743 0.1328<br>0.2171           |
| 354. | (0.00023) | RY*( 2) | H | 26 | s( 33.40%)p 1.99( 66.60%)<br>-0.0046 -0.2703 0.5108 -0.4575 0.5087                   |

|      |           |         |   |    |                                                                                      |
|------|-----------|---------|---|----|--------------------------------------------------------------------------------------|
| 355. | (0.00014) | RY*( 3) | H | 26 | 0.4449<br>s( 17.75%)p 4.64( 82.25%)<br>0.0010 0.0244 0.4206 0.6480 -0.3106<br>0.5534 |
| 356. | (0.00009) | RY*( 4) | H | 26 | s( 56.77%)p 0.76( 43.23%)                                                            |
| 357. | (0.00002) | RY*( 5) | H | 26 | s( 1.64%)p59.81( 98.36%)                                                             |
| 358. | (0.00137) | RY*( 1) | H | 27 | s( 89.15%)p 0.12( 10.85%)<br>-0.0041 0.9441 0.0113 -0.1266 0.2677<br>0.1444          |
| 359. | (0.00017) | RY*( 2) | H | 27 | s( 53.25%)p 0.88( 46.75%)<br>0.0000 -0.2004 0.7016 -0.5833 0.2871<br>0.2119          |
| 360. | (0.00014) | RY*( 3) | H | 27 | s( 8.16%)p11.25( 91.84%)<br>0.0010 -0.1063 0.2652 0.7192 0.6082<br>0.1770            |
| 361. | (0.00009) | RY*( 4) | H | 27 | s( 49.39%)p 1.02( 50.61%)                                                            |
| 362. | (0.00003) | RY*( 5) | H | 27 | s( 0.10%)p99.99( 99.90%)                                                             |
| 363. | (0.00079) | RY*( 1) | H | 28 | s( 98.23%)p 0.02( 1.77%)<br>-0.0031 0.9911 -0.0081 -0.0190 0.1218<br>0.0500          |
| 364. | (0.00024) | RY*( 2) | H | 28 | s( 27.23%)p 2.67( 72.77%)<br>-0.0045 0.1123 0.5095 -0.1561 -0.7956<br>-0.2654        |
| 365. | (0.00018) | RY*( 3) | H | 28 | s( 29.75%)p 2.36( 70.25%)<br>-0.0012 -0.0540 0.5427 -0.2088 0.1128<br>0.8039         |
| 366. | (0.00008) | RY*( 4) | H | 28 | s( 39.11%)p 1.56( 60.89%)                                                            |
| 367. | (0.00003) | RY*( 5) | H | 28 | s( 5.74%)p16.42( 94.26%)                                                             |
| 368. | (0.00080) | RY*( 1) | H | 29 | s( 84.30%)p 0.19( 15.70%)<br>-0.0036 0.9178 0.0260 0.2692 0.2896<br>-0.0261          |
| 369. | (0.00018) | RY*( 2) | H | 29 | s( 46.54%)p 1.15( 53.46%)<br>-0.0019 -0.3325 0.5957 0.4887 0.5428<br>-0.0329         |
| 370. | (0.00015) | RY*( 3) | H | 29 | s( 11.72%)p 7.53( 88.28%)<br>0.0008 0.0956 0.3287 -0.8007 0.4328<br>0.2331           |
| 371. | (0.00009) | RY*( 4) | H | 29 | s( 57.22%)p 0.75( 42.78%)                                                            |
| 372. | (0.00003) | RY*( 5) | H | 29 | s( 0.27%)p99.99( 99.73%)                                                             |
| 373. | (0.00071) | RY*( 1) | H | 30 | s( 91.28%)p 0.10( 8.72%)<br>-0.0018 0.9546 -0.0392 0.1456 0.2461<br>-0.0739          |
| 374. | (0.00028) | RY*( 2) | H | 30 | s( 51.49%)p 0.94( 48.51%)<br>-0.0087 0.2101 0.6860 0.0209 -0.6281<br>0.3002          |
| 375. | (0.00011) | RY*( 3) | H | 30 | s( 46.14%)p 1.17( 53.86%)<br>-0.0001 -0.1926 0.6514 0.3263 0.6574<br>-0.0009         |
| 376. | (0.00010) | RY*( 4) | H | 30 | s( 3.52%)p27.37( 96.48%)<br>-0.0015 -0.0187 0.1868 0.1155 -0.2492<br>-0.9430         |
| 377. | (0.00003) | RY*( 5) | H | 30 | s( 7.62%)p12.12( 92.38%)                                                             |
| 378. | (0.00090) | RY*( 1) | H | 31 | s( 85.35%)p 0.17( 14.65%)<br>-0.0036 0.9235 0.0240 0.2572 0.2407<br>-0.1498          |
| 379. | (0.00018) | RY*( 2) | H | 31 | s( 51.35%)p 0.95( 48.65%)<br>-0.0015 -0.3058 0.6480 0.4642 0.4340<br>-0.2875         |
| 380. | (0.00014) | RY*( 3) | H | 31 | s( 8.37%)p10.95( 91.63%)<br>0.0005 0.0884 0.2754 -0.8093 0.2071<br>-0.4674           |
| 381. | (0.00009) | RY*( 4) | H | 31 | s( 54.44%)p 0.84( 45.56%)                                                            |
| 382. | (0.00003) | RY*( 5) | H | 31 | s( 0.54%)p99.99( 99.46%)                                                             |
| 383. | (0.00067) | RY*( 1) | H | 32 | s( 79.36%)p 0.26( 20.64%)<br>-0.0037 0.8899 0.0416 0.0707 -0.3911<br>0.2201          |
| 384. | (0.00019) | RY*( 2) | H | 32 | s( 56.74%)p 0.76( 43.26%)<br>-0.0017 -0.3291 0.6775 -0.1791 -0.4714<br>0.4223        |
| 385. | (0.00015) | RY*( 3) | H | 32 | s( 3.56%)p27.13( 96.44%)<br>0.0001 0.1886 0.0013 -0.8985 0.3601                      |

```

                                0.1657
386. (0.00009) RY*( 4) H 32      s( 60.06%)p 0.66( 39.94%)
387. (0.00003) RY*( 5) H 32      s(  0.33%)p99.99( 99.67%)
388. (0.00074) RY*( 1) H 33      s( 80.13%)p 0.25( 19.87%)
                                -0.0038  0.8944  0.0355  0.0634 -0.4339
                                0.0803
389. (0.00018) RY*( 2) H 33      s( 58.35%)p 0.71( 41.65%)
                                -0.0015 -0.3145  0.6962 -0.1705 -0.6217
                                -0.0295
390. (0.00014) RY*( 3) H 33      s(  2.86%)p33.95( 97.14%)
                                -0.0002  0.1592 -0.0572 -0.8946  0.1195
                                -0.3960
391. (0.00009) RY*( 4) H 33      s( 58.45%)p 0.71( 41.55%)
392. (0.00003) RY*( 5) H 33      s(  0.25%)p99.99( 99.75%)
393. (0.00217) RY*( 1) H 34      s( 93.85%)p 0.07(  6.15%)
                                -0.0014  0.9687 -0.0137 -0.0789 -0.2263
                                0.0635
394. (0.00035) RY*( 2) H 34      s( 77.16%)p 0.30( 22.84%)
                                -0.0035  0.1327  0.8683  0.2158  0.4209
                                -0.0681
395. (0.00012) RY*( 3) H 34      s( 24.75%)p 3.04( 75.25%)
                                0.0079 -0.1942  0.4580 -0.4774 -0.5655
                                0.4525
396. (0.00010) RY*( 4) H 34      s(  3.66%)p26.34( 96.34%)
397. (0.00004) RY*( 5) H 34      s(  0.64%)p99.99( 99.36%)
398. (0.04797) BD*( 1) N   1 - C   2
      ( 37.59%)  0.6131* N   1 s( 34.50%)p 1.90( 65.45%)d 0.00(  0.06%)
                                0.0001 -0.5873 -0.0058  0.0055 -0.0001
                                0.3369 -0.0120 -0.0004 -0.6846 -0.0052
                                0.0072  0.2686  0.0014 -0.0024  0.0102
                                -0.0042  0.0135  0.0133  0.0098
      ( 62.41%) -0.7900* C   2 s( 26.95%)p 2.71( 72.97%)d 0.00(  0.07%)
                                0.0003 -0.5185 -0.0253 -0.0003 -0.0001
                                -0.2518  0.0114  0.0011  0.7624  0.0194
                                0.0172 -0.2903 -0.0065 -0.0062  0.0184
                                -0.0071  0.0123  0.0110  0.0093
399. (0.02785) BD*( 1) N   1 - C   5
      ( 38.27%)  0.6187* N   1 s( 32.56%)p 2.07( 67.39%)d 0.00(  0.05%)
                                0.0000 -0.5706  0.0027 -0.0014  0.0000
                                -0.8154  0.0015  0.0034  0.0606 -0.0166
                                0.0099 -0.0703  0.0060 -0.0033 -0.0033
                                -0.0013  0.0000 -0.0200  0.0116
      ( 61.73%) -0.7857* C   5 s( 28.77%)p 2.47( 71.15%)d 0.00(  0.08%)
                                0.0001 -0.5362 -0.0119  0.0034  0.0010
                                0.8370  0.0353 -0.0069  0.0916  0.0221
                                0.0122  0.0224 -0.0056 -0.0048  0.0028
                                -0.0044  0.0017 -0.0233  0.0155
400. (0.01663) BD*( 1) N   1 - C  10
      ( 37.39%)  0.6115* N   1 s( 32.89%)p 2.04( 67.08%)d 0.00(  0.02%)
                                0.0001 -0.5735  0.0077 -0.0034  0.0001
                                0.4666  0.0020 -0.0083  0.6411 -0.0001
                                -0.0020 -0.2048  0.0002  0.0004 -0.0126
                                0.0040  0.0051  0.0024  0.0066
      ( 62.61%) -0.7913* C  10 s( 24.82%)p 3.03( 75.10%)d 0.00(  0.08%)
                                -0.0001 -0.4975 -0.0259  0.0006  0.0002
                                -0.5328 -0.0212  0.0041 -0.6492 -0.0194
                                0.0050  0.2117  0.0063 -0.0016 -0.0219
                                0.0072  0.0091  0.0050  0.0114
401. (0.04502) BD*( 1) C   2 - N   3
      ( 62.35%)  0.7896* C   2 s( 26.62%)p 2.75( 73.30%)d 0.00(  0.07%)
                                0.0003 -0.5154 -0.0240 -0.0016 -0.0001
                                -0.6675 -0.0040 -0.0086 -0.5164 -0.0223
                                -0.0138  0.1415  0.0075  0.0042 -0.0193
                                0.0049  0.0025 -0.0130  0.0131
      ( 37.65%) -0.6136* N   3 s( 34.61%)p 1.89( 65.33%)d 0.00(  0.06%)
                                0.0001 -0.5883 -0.0057  0.0047 -0.0001
                                0.6902 -0.0070 -0.0039  0.4080  0.0117
                                -0.0060 -0.1012 -0.0043  0.0020 -0.0187
                                0.0047  0.0055 -0.0048  0.0127
402. (0.58815) BD*( 2) C   2 - N   3
      ( 73.24%)  0.8558* C   2 s(  0.00%)p 1.00( 99.85%)d 0.00(  0.15%)

```

|      |           |          |   |       |            |                 |                |         |         |
|------|-----------|----------|---|-------|------------|-----------------|----------------|---------|---------|
|      |           |          |   |       | 0.0000     | 0.0030          | 0.0004         | 0.0003  | 0.0000  |
|      |           |          |   |       | -0.0648    | -0.0029         | 0.0008         | 0.3377  | 0.0114  |
|      |           |          |   |       | -0.0036    | 0.9375          | 0.0328         | -0.0101 | 0.0118  |
|      |           |          |   |       | 0.0347     | 0.0113          | -0.0068        | -0.0037 |         |
|      | ( 26.76%) | -0.5173* | N | 3     | s( 0.00%)  | p 1.00( 99.98%) | d 0.00( 0.02%) |         |         |
|      |           |          |   |       | 0.0000     | 0.0017          | 0.0000         | -0.0002 | 0.0000  |
|      |           |          |   |       | -0.0624    | 0.0000          | -0.0005        | 0.3408  | -0.0002 |
|      |           |          |   |       | 0.0031     | 0.9379          | -0.0006        | 0.0085  | -0.0014 |
|      |           |          |   |       | -0.0063    | -0.0102         | 0.0046         | 0.0065  |         |
| 403. | (0.05872) | BD*( 1)  | C | 2 - B | 6          |                 |                |         |         |
|      | ( 34.42%) | 0.5866*  | C | 2     | s( 46.47%) | p 1.15( 53.53%) | d 0.00( 0.00%) |         |         |
|      |           |          |   |       | 0.0000     | 0.6815          | -0.0174        | -0.0024 | 0.0000  |
|      |           |          |   |       | -0.6960    | 0.0350          | 0.0114         | 0.1881  | -0.0105 |
|      |           |          |   |       | -0.0033    | -0.1179         | 0.0043         | 0.0030  | -0.0024 |
|      |           |          |   |       | 0.0023     | -0.0016         | 0.0038         | -0.0039 |         |
|      | ( 65.58%) | -0.8098* | B | 6     | s( 36.56%) | p 1.73( 63.40%) | d 0.00( 0.04%) |         |         |
|      |           |          |   |       | -0.0011    | 0.6046          | 0.0014         | -0.0031 | 0.0022  |
|      |           |          |   |       | 0.7492     | 0.0073          | 0.0129         | -0.2380 | -0.0031 |
|      |           |          |   |       | -0.0041    | 0.1257          | 0.0028         | 0.0026  | -0.0083 |
|      |           |          |   |       | 0.0050     | -0.0020         | 0.0145         | -0.0110 |         |
| 404. | (0.02694) | BD*( 1)  | N | 3 - C | 4          |                 |                |         |         |
|      | ( 38.40%) | 0.6197*  | N | 3     | s( 32.32%) | p 2.09( 67.62%) | d 0.00( 0.06%) |         |         |
|      |           |          |   |       | 0.0000     | -0.5685         | 0.0034         | -0.0008 | 0.0000  |
|      |           |          |   |       | -0.7202    | 0.0118          | -0.0028        | 0.3551  | 0.0133  |
|      |           |          |   |       | -0.0101    | -0.1759         | -0.0041        | 0.0034  | 0.0181  |
|      |           |          |   |       | -0.0080    | 0.0060          | -0.0059        | 0.0096  |         |
|      | ( 61.60%) | -0.7848* | C | 4     | s( 28.88%) | p 2.46( 71.03%) | d 0.00( 0.08%) |         |         |
|      |           |          |   |       | 0.0001     | -0.5373         | -0.0119        | 0.0033  | 0.0010  |
|      |           |          |   |       | 0.6505     | 0.0162          | -0.0129        | -0.4883 | -0.0359 |
|      |           |          |   |       | -0.0068    | 0.2164          | 0.0138         | 0.0014  | 0.0177  |
|      |           |          |   |       | -0.0090    | 0.0060          | -0.0137        | 0.0140  |         |
| 405. | (0.01793) | BD*( 1)  | N | 3 - C | 9          |                 |                |         |         |
|      | ( 36.96%) | 0.6079*  | N | 3     | s( 33.01%) | p 2.03( 66.97%) | d 0.00( 0.02%) |         |         |
|      |           |          |   |       | 0.0001     | -0.5745         | 0.0066         | -0.0033 | 0.0001  |
|      |           |          |   |       | 0.0059     | 0.0007          | -0.0051        | -0.7686 | -0.0021 |
|      |           |          |   |       | 0.0056     | 0.2807          | 0.0008         | -0.0024 | 0.0013  |
|      |           |          |   |       | -0.0005    | 0.0087          | 0.0114         | 0.0050  |         |
|      | ( 63.04%) | -0.7940* | C | 9     | s( 24.53%) | p 3.07( 75.40%) | d 0.00( 0.08%) |         |         |
|      |           |          |   |       | -0.0001    | -0.4945         | -0.0269        | 0.0013  | 0.0002  |
|      |           |          |   |       | -0.0376    | -0.0061         | 0.0014         | 0.8133  | 0.0289  |
|      |           |          |   |       | -0.0069    | -0.3002         | -0.0110        | 0.0024  | 0.0020  |
|      |           |          |   |       | -0.0007    | 0.0155          | 0.0210         | 0.0088  |         |
| 406. | (0.00852) | BD*( 1)  | C | 4 - C | 5          |                 |                |         |         |
|      | ( 50.04%) | 0.7074*  | C | 4     | s( 37.00%) | p 1.70( 62.93%) | d 0.00( 0.06%) |         |         |
|      |           |          |   |       | 0.0001     | -0.6083         | -0.0065        | -0.0006 | -0.0001 |
|      |           |          |   |       | 0.1378     | -0.0167         | -0.0206        | 0.7380  | 0.0273  |
|      |           |          |   |       | -0.0041    | -0.2532         | -0.0109        | 0.0002  | -0.0155 |
|      |           |          |   |       | 0.0047     | 0.0112          | 0.0108         | 0.0114  |         |
|      | ( 49.96%) | -0.7069* | C | 5     | s( 37.07%) | p 1.70( 62.87%) | d 0.00( 0.06%) |         |         |
|      |           |          |   |       | 0.0001     | -0.6088         | -0.0062        | -0.0007 | -0.0001 |
|      |           |          |   |       | -0.3192    | -0.0301         | -0.0151        | -0.6882 | -0.0153 |
|      |           |          |   |       | 0.0137     | 0.2272          | 0.0034         | -0.0058 | -0.0052 |
|      |           |          |   |       | 0.0015     | 0.0141          | 0.0173         | 0.0104  |         |
| 407. | (0.29507) | BD*( 2)  | C | 4 - C | 5          |                 |                |         |         |
|      | ( 50.20%) | 0.7085*  | C | 4     | s( 0.00%)  | p 1.00( 99.96%) | d 0.00( 0.04%) |         |         |
|      |           |          |   |       | 0.0000     | 0.0005          | 0.0005         | -0.0001 | 0.0000  |
|      |           |          |   |       | -0.0612    | 0.0022          | -0.0011        | 0.3341  | -0.0125 |
|      |           |          |   |       | 0.0060     | 0.9394          | -0.0352        | 0.0168  | -0.0028 |
|      |           |          |   |       | -0.0109    | -0.0128         | 0.0059         | 0.0078  |         |
|      | ( 49.80%) | -0.7057* | C | 5     | s( 0.00%)  | p 1.00( 99.96%) | d 0.00( 0.04%) |         |         |
|      |           |          |   |       | 0.0000     | 0.0011          | 0.0004         | 0.0000  | 0.0000  |
|      |           |          |   |       | -0.0613    | 0.0023          | -0.0011        | 0.3372  | -0.0127 |
|      |           |          |   |       | 0.0060     | 0.9383          | -0.0357        | 0.0169  | -0.0013 |
|      |           |          |   |       | 0.0000     | 0.0150          | -0.0061        | -0.0108 |         |
| 408. | (0.01201) | BD*( 1)  | C | 4 - H | 19         |                 |                |         |         |
|      | ( 38.31%) | 0.6190*  | C | 4     | s( 34.06%) | p 1.94( 65.92%) | d 0.00( 0.02%) |         |         |
|      |           |          |   |       | 0.0003     | -0.5835         | 0.0105         | -0.0013 | -0.0006 |
|      |           |          |   |       | -0.7432    | 0.0076          | 0.0056         | -0.3198 | 0.0086  |
|      |           |          |   |       | 0.0075     | 0.0656          | -0.0026        | -0.0023 | -0.0102 |
|      |           |          |   |       | 0.0024     | 0.0001          | -0.0078        | 0.0058  |         |
|      | ( 61.69%) | -0.7854* | H | 19    | s( 99.94%) | p 0.00( 0.06%)  |                |         |         |



-0.9997 -0.0015 -0.0002 0.0229 0.0095  
 -0.0019  
 409. (0.01274) BD\*( 1) C 5 - H 20  
 ( 38.37%) 0.6194\* C 5 s( 34.12%)p 1.93( 65.86%)d 0.00( 0.02%)  
 -0.0003 0.5840 -0.0103 0.0014 0.0006  
 0.4361 -0.0005 -0.0005 -0.6346 0.0109  
 0.0091 0.2559 -0.0039 -0.0033 -0.0105  
 0.0040 -0.0058 -0.0055 -0.0037  
 ( 61.63%) -0.7851\* H 20 s( 99.94%)p 0.00( 0.06%)  
 0.9997 0.0017 0.0006 -0.0139 0.0192  
 -0.0078  
 410. (0.07253) BD\*( 1) B 6 - C 7  
 ( 59.82%) 0.7734\* B 6 s( 28.33%)p 2.53( 71.61%)d 0.00( 0.06%)  
 -0.0009 0.5323 -0.0027 0.0037 -0.0007  
 -0.1303 0.0092 -0.0041 0.7668 0.0056  
 0.0098 -0.3330 -0.0004 -0.0053 -0.0139  
 0.0060 -0.0092 -0.0087 -0.0141  
 ( 40.18%) -0.6339\* C 7 s( 39.27%)p 1.55( 60.71%)d 0.00( 0.02%)  
 -0.0002 0.6254 -0.0385 0.0021 -0.0004  
 0.6986 0.0031 -0.0002 -0.3441 -0.0064  
 0.0066 0.0222 -0.0012 -0.0024 -0.0125  
 0.0040 -0.0029 -0.0026 -0.0065  
 411. (0.03873) BD\*( 1) B 6 - B 11  
 ( 50.09%) 0.7077\* B 6 s( 34.70%)p 1.88( 65.28%)d 0.00( 0.03%)  
 -0.0005 -0.5890 -0.0067 0.0007 0.0009  
 0.6430 -0.0077 -0.0119 0.4816 -0.0043  
 0.0048 -0.0839 -0.0015 -0.0012 0.0000  
 0.0010 0.0022 -0.0143 0.0064  
 ( 49.91%) -0.7065\* B 11 s( 40.21%)p 1.49( 59.76%)d 0.00( 0.02%)  
 -0.0001 -0.6341 0.0031 -0.0001 0.0006  
 -0.6572 -0.0120 0.0145 0.4042 -0.0202  
 0.0056 -0.0380 0.0075 -0.0049 -0.0067  
 0.0049 -0.0006 -0.0112 0.0051  
 412. (0.04637) BD\*( 1) C 7 - O 8  
 ( 64.27%) 0.8017\* C 7 s( 33.83%)p 1.95( 66.08%)d 0.00( 0.09%)  
 -0.0003 0.5766 0.0766 0.0013 0.0010  
 -0.1172 0.0090 -0.0016 0.7975 -0.0521  
 0.0063 -0.0894 0.0159 0.0007 -0.0083  
 0.0009 -0.0059 -0.0251 -0.0134  
 ( 35.73%) -0.5978\* O 8 s( 38.87%)p 1.57( 61.00%)d 0.00( 0.13%)  
 0.0000 0.6232 -0.0183 0.0046 0.0001  
 0.1123 -0.0038 -0.0007 -0.7057 0.0322  
 -0.0020 0.3132 -0.0101 -0.0007 -0.0087  
 0.0032 -0.0179 -0.0275 -0.0117  
 413. (0.43205) BD\*( 2) C 7 - O 8  
 ( 71.79%) 0.8473\* C 7 s( 0.61%)p99.99( 99.15%)d 0.39( 0.24%)  
 0.0002 -0.0764 -0.0157 0.0039 0.0002  
 0.1280 -0.0021 -0.0009 0.1848 0.0124  
 0.0030 0.9698 -0.0008 0.0184 0.0041  
 -0.0102 0.0424 -0.0111 -0.0181  
 ( 28.21%) -0.5311\* O 8 s( 0.47%)p99.99( 99.43%)d 0.21( 0.10%)  
 0.0000 -0.0682 0.0041 0.0001 -0.0001  
 0.1246 -0.0031 -0.0006 0.3669 -0.0092  
 0.0000 0.9187 -0.0127 -0.0021 -0.0016  
 0.0051 -0.0243 0.0123 0.0149  
 414. (0.11509) BD\*( 1) C 7 - B 11  
 ( 40.81%) 0.6388\* C 7 s( 26.79%)p 2.73( 73.18%)d 0.00( 0.03%)  
 0.0001 0.5172 -0.0213 -0.0033 -0.0001  
 -0.6932 -0.0041 0.0008 -0.4508 -0.0179  
 0.0065 0.2180 0.0102 -0.0006 0.0120  
 -0.0049 -0.0065 -0.0048 -0.0070  
 ( 59.19%) -0.7693\* B 11 s( 20.12%)p 3.97( 79.83%)d 0.00( 0.05%)  
 -0.0038 0.4483 -0.0134 0.0038 -0.0044  
 0.0996 -0.0058 -0.0066 0.8375 -0.0007  
 0.0084 -0.2944 0.0018 -0.0122 0.0082  
 0.0000 -0.0101 -0.0095 -0.0166  
 415. (0.01137) BD\*( 1) C 9 - H 32  
 ( 39.32%) 0.6271\* C 9 s( 24.29%)p 3.12( 75.67%)d 0.00( 0.04%)  
 0.0001 -0.4928 0.0065 -0.0019 -0.0002  
 -0.3921 0.0096 -0.0009 -0.5272 -0.0065  
 -0.0061 -0.5699 0.0066 -0.0011 -0.0090

-0.0117 -0.0131 0.0010 -0.0053  
 ( 60.68%) -0.7790\* H 32 s( 99.95%)p 0.00( 0.05%)  
 -0.9998 -0.0020 -0.0002 0.0078 0.0144  
 0.0142  
 416. (0.01225) BD\*( 1) C 9 - H 33  
 ( 39.31%) 0.6269\* C 9 s( 24.33%)p 3.11( 75.63%)d 0.00( 0.04%)  
 0.0001 -0.4932 0.0065 -0.0019 -0.0001  
 -0.4265 0.0101 -0.0016 -0.0395 -0.0090  
 -0.0040 0.7567 -0.0001 0.0045 0.0005  
 0.0156 -0.0016 -0.0045 -0.0124  
 ( 60.69%) -0.7791\* H 33 s( 99.95%)p 0.00( 0.05%)  
 -0.9998 -0.0022 -0.0002 0.0088 0.0018  
 -0.0197  
 417. (0.00878) BD\*( 1) C 9 - H 34  
 ( 35.52%) 0.5960\* C 9 s( 26.91%)p 2.71( 73.04%)d 0.00( 0.04%)  
 -0.0001 0.5187 -0.0035 -0.0026 -0.0001  
 -0.8137 0.0120 0.0068 0.2375 0.0028  
 0.0079 -0.1082 -0.0009 -0.0024 -0.0058  
 0.0029 0.0007 0.0176 -0.0092  
 ( 64.48%) -0.8030\* H 34 s( 99.94%)p 0.00( 0.06%)  
 0.9997 0.0021 0.0003 0.0240 -0.0049  
 0.0025  
 418. (0.01206) BD\*( 1) C 10 - H 29  
 ( 39.26%) 0.6266\* C 10 s( 24.52%)p 3.08( 75.44%)d 0.00( 0.04%)  
 0.0001 -0.4951 0.0079 -0.0020 -0.0001  
 -0.1481 0.0110 0.0034 0.2313 0.0025  
 0.0033 -0.8239 0.0061 -0.0053 0.0017  
 -0.0078 0.0069 -0.0003 -0.0176  
 ( 60.74%) -0.7794\* H 29 s( 99.95%)p 0.00( 0.05%)  
 -0.9998 -0.0023 -0.0002 0.0019 -0.0051  
 0.0208  
 419. (0.01214) BD\*( 1) C 10 - H 30  
 ( 36.22%) 0.6018\* C 10 s( 26.23%)p 2.81( 73.73%)d 0.00( 0.04%)  
 -0.0001 0.5122 -0.0007 -0.0036 0.0000  
 -0.8167 0.0038 0.0028 0.2486 -0.0085  
 -0.0090 -0.0910 0.0035 0.0032 -0.0135  
 0.0046 -0.0017 0.0116 -0.0090  
 ( 63.78%) -0.7987\* H 30 s( 99.95%)p 0.00( 0.05%)  
 0.9997 0.0018 0.0009 0.0197 -0.0099  
 0.0035  
 420. (0.01312) BD\*( 1) C 10 - H 31  
 ( 39.32%) 0.6271\* C 10 s( 24.49%)p 3.08( 75.47%)d 0.00( 0.04%)  
 -0.0001 0.4948 -0.0080 0.0023 0.0001  
 0.1611 -0.0106 -0.0028 -0.6791 0.0016  
 -0.0061 -0.5170 0.0059 -0.0022 -0.0066  
 -0.0053 0.0165 -0.0087 0.0022  
 ( 60.68%) -0.7789\* H 31 s( 99.95%)p 0.00( 0.05%)  
 0.9998 0.0025 0.0002 -0.0026 0.0166  
 0.0135  
 421. (0.03334) BD\*( 1) B 11 - C 12  
 ( 66.12%) 0.8132\* B 11 s( 39.46%)p 1.53( 60.49%)d 0.00( 0.05%)  
 -0.0003 0.6281 0.0102 0.0017 0.0042  
 -0.7398 -0.0165 -0.0138 -0.2056 -0.0036  
 -0.0051 0.1214 0.0024 0.0037 0.0073  
 -0.0053 -0.0003 0.0182 -0.0114  
 ( 33.88%) -0.5820\* C 12 s( 46.47%)p 1.15( 53.52%)d 0.00( 0.01%)  
 -0.0001 0.6815 -0.0161 -0.0066 0.0000  
 0.7231 -0.0379 -0.0074 0.0878 -0.0059  
 -0.0017 -0.0551 0.0012 0.0018 0.0033  
 -0.0028 0.0032 0.0061 -0.0035  
 422. (0.04275) BD\*( 1) C 12 - N 13  
 ( 61.95%) 0.7871\* C 12 s( 26.73%)p 2.74( 73.20%)d 0.00( 0.07%)  
 -0.0003 0.5165 0.0208 0.0058 0.0000  
 -0.5084 -0.0003 -0.0015 0.4869 0.0186  
 0.0113 0.4854 0.0159 0.0101 -0.0160  
 -0.0159 0.0125 0.0070 -0.0045  
 ( 38.05%) -0.6169\* N 13 s( 33.66%)p 1.97( 66.28%)d 0.00( 0.06%)  
 -0.0001 0.5801 0.0063 -0.0066 0.0001  
 0.5611 -0.0101 -0.0040 -0.4027 -0.0046  
 0.0071 -0.4308 -0.0053 0.0061 -0.0129  
 -0.0132 0.0154 0.0019 -0.0019

423. (0.69287) BD\*( 2) C 12 - N 13  
( 74.35%) 0.8622\* C 12 s( 0.00%)p 1.00( 99.85%)d 0.00( 0.15%)  
0.0002 0.0054 0.0016 -0.0014 0.0002  
0.1298 0.0100 -0.0060 -0.6309 -0.0207  
0.0037 0.7632 0.0244 -0.0060 0.0221  
-0.0215 0.0008 0.0040 0.0222  
( 25.65%) -0.5065\* N 13 s( 0.00%)p 1.00( 99.98%)d 0.00( 0.02%)  
0.0000 0.0002 0.0003 -0.0006 0.0000  
0.1266 0.0000 0.0013 -0.6367 -0.0008  
-0.0058 0.7605 0.0015 0.0076 -0.0031  
0.0008 -0.0024 -0.0054 -0.0111

424. (0.04534) BD\*( 1) C 12 - N 16  
( 62.03%) 0.7876\* C 12 s( 26.81%)p 2.73( 73.12%)d 0.00( 0.07%)  
-0.0003 0.5173 0.0219 0.0066 0.0000  
-0.4467 0.0046 0.0000 -0.5953 -0.0188  
-0.0125 -0.4200 -0.0148 -0.0098 0.0190  
0.0123 0.0133 0.0021 -0.0057  
( 37.97%) -0.6162\* N 16 s( 34.05%)p 1.93( 65.89%)d 0.00( 0.06%)  
-0.0001 0.5835 0.0069 -0.0062 0.0001  
0.5204 -0.0104 -0.0035 0.4826 0.0041  
-0.0078 0.3936 0.0047 -0.0059 0.0147  
0.0090 0.0157 -0.0021 -0.0041

425. (0.02556) BD\*( 1) N 13 - C 14  
( 38.32%) 0.6190\* N 13 s( 33.09%)p 2.02( 66.86%)d 0.00( 0.05%)  
0.0000 -0.5752 0.0018 -0.0024 0.0000  
0.7870 -0.0084 0.0006 0.2153 0.0120  
-0.0088 0.0494 0.0103 -0.0075 -0.0135  
-0.0060 -0.0029 -0.0138 0.0108  
( 61.68%) -0.7854\* C 14 s( 28.77%)p 2.47( 71.16%)d 0.00( 0.08%)  
0.0001 -0.5362 -0.0110 0.0027 0.0012  
-0.7622 -0.0259 0.0105 -0.3142 -0.0267  
-0.0075 -0.1729 -0.0196 -0.0076 -0.0113  
-0.0037 -0.0033 -0.0211 0.0138

426. (0.01595) BD\*( 1) N 13 - C 17  
( 37.57%) 0.6130\* N 13 s( 33.19%)p 2.01( 66.78%)d 0.00( 0.03%)  
0.0001 -0.5761 0.0086 -0.0034 0.0001  
-0.2210 -0.0029 0.0073 -0.6210 0.0012  
0.0036 -0.4830 0.0016 0.0017 -0.0068  
-0.0053 -0.0124 0.0057 0.0002  
( 62.43%) -0.7901\* C 17 s( 25.24%)p 2.96( 74.68%)d 0.00( 0.08%)  
-0.0001 -0.5017 -0.0265 0.0018 0.0002  
0.2565 0.0124 -0.0008 0.6701 0.0221  
-0.0059 0.4807 0.0142 -0.0034 -0.0108  
-0.0081 -0.0206 0.0124 0.0013

427. (0.00849) BD\*( 1) C 14 - C 15  
( 49.99%) 0.7070\* C 14 s( 37.28%)p 1.68( 62.65%)d 0.00( 0.06%)  
-0.0001 0.6106 0.0066 0.0007 0.0002  
-0.0647 -0.0234 -0.0183 -0.5996 -0.0203  
0.0056 -0.5111 -0.0148 0.0073 -0.0052  
-0.0055 0.0222 -0.0090 0.0028  
( 50.01%) -0.7072\* C 15 s( 37.32%)p 1.68( 62.62%)d 0.00( 0.06%)  
-0.0001 0.6109 0.0068 0.0009 0.0002  
-0.1179 -0.0243 -0.0185 0.5701 0.0177  
-0.0084 0.5344 0.0181 -0.0052 0.0040  
0.0031 0.0225 -0.0099 0.0024

428. (0.30224) BD\*( 2) C 14 - C 15  
( 50.57%) 0.7111\* C 14 s( 0.00%)p 1.00( 99.96%)d 0.00( 0.04%)  
0.0001 -0.0061 -0.0024 0.0005 0.0000  
0.1047 -0.0040 0.0018 -0.6546 0.0253  
-0.0113 0.7473 -0.0275 0.0128 -0.0048  
0.0029 -0.0017 -0.0081 -0.0168  
( 49.43%) -0.7031\* C 15 s( 0.00%)p 1.00( 99.96%)d 0.00( 0.04%)  
-0.0001 -0.0047 0.0000 0.0000 0.0000  
0.0960 -0.0030 0.0017 -0.6666 0.0266  
-0.0116 0.7377 -0.0293 0.0116 -0.0013  
0.0045 0.0021 0.0099 0.0155

429. (0.01215) BD\*( 1) C 14 - H 21  
( 38.54%) 0.6208\* C 14 s( 33.90%)p 1.95( 66.08%)d 0.00( 0.02%)  
-0.0003 0.5821 -0.0101 0.0007 0.0007  
-0.6336 0.0044 0.0036 0.3330 -0.0072  
-0.0063 0.3851 -0.0075 -0.0057 -0.0092

-0.0098 0.0040 0.0042 -0.0012  
 ( 61.46%) -0.7839\* H 21 s( 99.94%)p 0.00( 0.06%)  
 0.9997 0.0016 0.0003 0.0200 -0.0097  
 -0.0116

430. (0.02647) BD\*( 1) C 15 - N 16  
 ( 61.73%) 0.7857\* C 15 s( 28.57%)p 2.50( 71.35%)d 0.00( 0.08%)  
 -0.0001 0.5344 0.0113 -0.0031 -0.0011  
 0.7864 0.0298 -0.0094 -0.1705 -0.0216  
 -0.0099 -0.2529 -0.0214 -0.0066 -0.0029  
 -0.0086 0.0030 0.0232 -0.0129  
 ( 38.27%) -0.6186\* N 16 s( 32.78%)p 2.05( 67.17%)d 0.00( 0.05%)  
 0.0000 0.5725 -0.0007 0.0023 0.0000  
 -0.8040 0.0076 0.0005 0.0538 0.0115  
 -0.0085 0.1484 0.0097 -0.0079 -0.0073  
 -0.0094 0.0027 0.0170 -0.0094

431. (0.01206) BD\*( 1) C 15 - H 22  
 ( 38.56%) 0.6210\* C 15 s( 34.05%)p 1.94( 65.93%)d 0.00( 0.02%)  
 0.0003 -0.5835 0.0104 -0.0008 -0.0006  
 0.5964 -0.0022 -0.0033 0.4467 -0.0077  
 -0.0070 0.3223 -0.0059 -0.0064 -0.0106  
 -0.0079 -0.0048 -0.0017 0.0030  
 ( 61.44%) -0.7838\* H 22 s( 99.94%)p 0.00( 0.06%)  
 -0.9997 -0.0016 -0.0002 -0.0189 -0.0130  
 -0.0100

432. (0.01628) BD\*( 1) N 16 - C 18  
 ( 37.96%) 0.6161\* N 16 s( 33.11%)p 2.02( 66.86%)d 0.00( 0.03%)  
 0.0001 -0.5754 0.0098 -0.0031 0.0001  
 -0.2725 -0.0013 0.0074 0.5435 -0.0018  
 -0.0018 0.5466 -0.0023 -0.0035 0.0061  
 0.0076 -0.0127 0.0027 -0.0040  
 ( 62.04%) -0.7877\* C 18 s( 25.65%)p 2.90( 74.28%)d 0.00( 0.08%)  
 -0.0001 -0.5058 -0.0261 0.0000 0.0002  
 0.3175 0.0135 -0.0015 -0.5550 -0.0159  
 0.0039 -0.5772 -0.0192 0.0026 0.0107  
 0.0114 -0.0210 0.0066 -0.0052

433. (0.00663) BD\*( 1) C 17 - H 23  
 ( 39.43%) 0.6279\* C 17 s( 24.24%)p 3.12( 75.72%)d 0.00( 0.04%)  
 0.0001 -0.4923 0.0047 -0.0026 -0.0003  
 0.6870 -0.0103 -0.0034 -0.5038 -0.0053  
 -0.0053 -0.1769 -0.0015 -0.0028 0.0148  
 0.0041 -0.0029 -0.0085 0.0095  
 ( 60.57%) -0.7783\* H 23 s( 99.95%)p 0.00( 0.05%)  
 -0.9997 -0.0013 -0.0002 -0.0166 0.0150  
 0.0043

434. (0.01955) BD\*( 1) C 17 - H 24  
 ( 39.25%) 0.6265\* C 17 s( 24.62%)p 3.06( 75.34%)d 0.00( 0.04%)  
 0.0001 -0.4962 0.0058 -0.0008 0.0001  
 -0.3335 -0.0059 0.0038 0.2921 -0.0094  
 -0.0018 -0.7460 0.0047 -0.0078 0.0070  
 -0.0104 0.0114 -0.0003 -0.0117  
 ( 60.75%) -0.7794\* H 24 s( 99.96%)p 0.00( 0.04%)  
 -0.9998 -0.0043 -0.0002 0.0090 -0.0071  
 0.0175

435. (0.01126) BD\*( 1) C 17 - H 25  
 ( 36.67%) 0.6056\* C 17 s( 25.95%)p 2.85( 74.01%)d 0.00( 0.05%)  
 0.0001 -0.5093 0.0061 0.0020 0.0001  
 -0.5918 0.0041 0.0068 -0.4582 0.0033  
 -0.0104 0.4238 -0.0109 -0.0024 -0.0098  
 0.0149 0.0107 -0.0043 0.0020  
 ( 63.33%) -0.7958\* H 25 s( 99.94%)p 0.00( 0.06%)  
 -0.9997 -0.0030 0.0000 0.0167 0.0106  
 -0.0136

436. (0.01138) BD\*( 1) C 18 - H 26  
 ( 39.45%) 0.6281\* C 18 s( 24.44%)p 3.09( 75.52%)d 0.00( 0.04%)  
 -0.0001 0.4943 -0.0072 0.0030 0.0003  
 -0.4176 0.0090 0.0040 -0.7589 0.0017  
 -0.0054 0.0680 -0.0063 -0.0016 0.0152  
 -0.0026 -0.0045 -0.0072 -0.0100  
 ( 60.55%) -0.7782\* H 26 s( 99.95%)p 0.00( 0.05%)  
 0.9997 0.0023 0.0003 0.0094 0.0201  
 -0.0019

```

437. (0.01881) BD*( 1) C 18 - H 27
      ( 39.04%) 0.6248* C 18 s( 24.84%)p 3.02( 75.12%)d 0.00( 0.04%)
          -0.0001 0.4983 -0.0079 0.0012 -0.0002
          -0.1120 0.0097 -0.0015 0.3145 -0.0080
          -0.0013 -0.7997 0.0051 -0.0072 -0.0010
          0.0047 -0.0132 -0.0022 0.0147
      ( 60.96%) -0.7808* H 27 s( 99.96%)p 0.00( 0.04%)
          0.9998 0.0041 0.0003 0.0016 -0.0085
          0.0188

438. (0.01221) BD*( 1) C 18 - H 28
      ( 37.63%) 0.6134* C 18 s( 25.14%)p 2.98( 74.82%)d 0.00( 0.04%)
          0.0001 -0.5013 0.0018 0.0040 0.0000
          -0.8434 0.0038 0.0055 0.1246 0.0002
          0.0091 -0.1451 0.0099 0.0029 0.0016
          -0.0090 0.0014 -0.0159 0.0098
      ( 62.37%) -0.7898* H 28 s( 99.95%)p 0.00( 0.05%)
          -0.9998 -0.0029 -0.0002 0.0216 -0.0005
          0.0041

```

NHO Directionality and "Bond Bending" (deviations from line of nuclear centers)

[Thresholds for printing: angular deviation > 1.0 degree]  
hybrid p-character > 25.0%  
orbital occupancy > 0.10e

| NBO                      | Line of Centers |       |     | Hybrid 1 |       |      | Hybrid 2 |       |      |
|--------------------------|-----------------|-------|-----|----------|-------|------|----------|-------|------|
|                          | Theta           | Phi   | Dev | Theta    | Phi   | Dev  | Theta    | Phi   | Dev  |
| 1. BD ( 1) N 1 - C 2     | 109.7           | 112.0 |     | 109.5    | 115.4 | 3.2  | 70.0     | 286.7 | 5.1  |
| 2. BD ( 1) N 1 - C 5     | 86.8            | 1.2   |     | 85.2     | 356.2 | 5.2  | 90.8     | 188.3 | 7.5  |
| 3. BD ( 1) N 1 - C 10    | 75.6            | 232.3 |     | 75.5     | 234.2 | 1.8  | 104.1    | 50.4  | 1.9  |
| 4. BD ( 1) C 2 - N 3     | 98.5            | 34.6  |     | 99.9     | 39.1  | 4.7  | 82.6     | 211.3 | 3.4  |
| 5. BD ( 2) C 2 - N 3     | 98.5            | 34.6  |     | 20.1     | 100.9 | 90.1 | 20.3     | 100.4 | 90.1 |
| 6. BD ( 1) C 2 - B 6     | 99.8            | 163.9 |     | 99.3     | 165.0 | 1.2  | 80.8     | 342.3 | 1.7  |
| 7. BD ( 1) N 3 - C 4     | 76.3            | 328.3 |     | 77.5     | 333.3 | 5.0  | 105.4    | 140.9 | 7.3  |
| 8. BD ( 1) N 3 - C 9     | 110.2           | 91.5  |     | 110.0    | 90.1  | 1.3  | 69.7     | 272.9 | 1.3  |
| 9. BD ( 1) C 4 - C 5     | 72.2            | 252.3 |     | 71.0     | 262.5 | 9.8  | 106.1    | 62.2  | 9.8  |
| 10. BD ( 2) C 4 - C 5    | 72.2            | 252.3 |     | 19.9     | 100.4 | 89.9 | 20.1     | 100.3 | 89.9 |
| 13. BD ( 1) B 6 - C 7    | 103.2           | 123.9 |     | 113.2    | 99.1  | 25.5 | 88.6     | 333.9 | 31.9 |
| 14. BD ( 1) B 6 - B 11   | 85.8            | 184.9 |     | 83.7     | 217.7 | 32.7 | 87.3     | 329.2 | 36.3 |
| 15. BD ( 1) C 7 - O 8    | 104.7           | 98.9  |     | 95.5     | 98.3  | 9.2  | 66.1     | 279.1 | 9.2  |
| 16. BD ( 2) C 7 - O 8    | 104.7           | 98.9  |     | 166.6    | 238.0 | 85.6 | 157.3    | 251.3 | 84.4 |
| 17. BD ( 1) C 7 - B 11   | 73.5            | 240.6 |     | 74.8     | 213.6 | 26.0 | 109.7    | 84.1  | 22.5 |
| 20. BD ( 1) C 9 - H 34   | 97.0            | 164.4 |     | 97.6     | 162.7 | 1.9  | --       | --    | --   |
| 22. BD ( 1) C 10 - H 30  | 96.5            | 161.5 |     | 95.7     | 164.1 | 2.7  | --       | --    | --   |
| 24. BD ( 1) B 11 - C 12  | 83.0            | 191.1 |     | 80.9     | 195.6 | 4.9  | 94.4     | 6.7   | 5.1  |
| 25. BD ( 1) C 12 - N 13  | 56.7            | 140.0 |     | 54.8     | 134.6 | 4.8  | 122.4    | 323.8 | 3.3  |
| 26. BD ( 2) C 12 - N 13  | 56.7            | 140.0 |     | 40.2     | 281.7 | 90.3 | 139.6    | 101.2 | 90.3 |
| 27. BD ( 1) C 12 - N 16  | 118.8           | 228.6 |     | 120.1    | 234.8 | 5.6  | 60.6     | 43.4  | 4.6  |
| 28. BD ( 1) N 13 - C 14  | 97.9            | 199.0 |     | 93.7     | 195.7 | 5.3  | 76.8     | 24.1  | 7.3  |
| 29. BD ( 1) N 13 - C 17  | 55.0            | 69.1  |     | 53.7     | 70.6  | 1.8  | 123.7    | 248.7 | 1.3  |
| 30. BD ( 1) C 14 - C 15  | 131.7           | 272.6 |     | 129.8    | 260.2 | 9.6  | 47.7     | 105.5 | 9.6  |
| 31. BD ( 2) C 14 - C 15  | 131.7           | 272.6 |     | 138.5    | 99.1  | 89.6 | 137.6    | 98.3  | 89.4 |
| 33. BD ( 1) C 15 - N 16  | 103.8           | 351.8 |     | 108.7    | 345.9 | 7.4  | 79.3     | 175.9 | 5.1  |
| 35. BD ( 1) N 16 - C 18  | 132.9           | 298.5 |     | 131.9    | 296.3 | 1.9  | 47.8     | 120.2 | 1.4  |
| 36. BD ( 1) C 17 - H 23  | 78.7            | 143.6 |     | 77.9     | 142.6 | 1.2  | --       | --    | --   |
| 38. BD ( 1) C 17 - H 25  | 119.9           | 37.4  |     | 118.9    | 38.7  | 1.5  | --       | --    | --   |
| 41. BD ( 1) C 18 - H 28  | 80.1            | 352.7 |     | 81.1     | 350.9 | 2.1  | --       | --    | --   |
| 60. LP ( 1) N 1          | --              | --    |     | 159.8    | 279.3 | --   | --       | --    | --   |
| 61. LP ( 1) B 6          | --              | --    |     | 21.3     | 104.1 | --   | --       | --    | --   |
| 62. LP ( 1) O 8          | --              | --    |     | 104.3    | 105.0 | --   | --       | --    | --   |
| 63. LP ( 2) O 8          | --              | --    |     | 100.4    | 7.8   | --   | --       | --    | --   |
| 64. LP*( 1) B 11         | --              | --    |     | 18.4     | 69.8  | --   | --       | --    | --   |
| 65. LP ( 1) N 16         | --              | --    |     | 43.6     | 277.2 | --   | --       | --    | --   |
| 402. BD*( 2) C 2 - N 3   | 98.5            | 34.6  |     | 20.1     | 100.9 | 90.1 | 20.3     | 100.4 | 90.1 |
| 407. BD*( 2) C 4 - C 5   | 72.2            | 252.3 |     | 19.9     | 100.4 | 89.9 | 20.1     | 100.3 | 89.9 |
| 413. BD*( 2) C 7 - O 8   | 104.7           | 98.9  |     | 166.6    | 238.0 | 85.6 | 157.3    | 251.3 | 84.4 |
| 414. BD*( 1) C 7 - B 11  | 73.5            | 240.6 |     | 74.8     | 213.6 | 26.0 | 109.7    | 84.1  | 22.5 |
| 423. BD*( 2) C 12 - N 13 | 56.7            | 140.0 |     | 40.2     | 281.7 | 90.3 | 139.6    | 101.2 | 90.3 |

428. BD\*( 2) C 14 - C 15 131.7 272.6 138.5 99.1 89.6 137.6 98.3 89.4

Second Order Perturbation Theory Analysis of Fock Matrix in NBO Basis

Threshold for printing: 0.50 kcal/mol

| F(i,j) | Donor NBO (i) | Acceptor NBO (j) | E(2)<br>kcal/mol | E(j)-E(i)<br>a.u. |
|--------|---------------|------------------|------------------|-------------------|
|--------|---------------|------------------|------------------|-------------------|

=====

|       |                       |                          |      |      |
|-------|-----------------------|--------------------------|------|------|
|       | within unit 1         |                          |      |      |
| 0.031 | 1. BD ( 1) N 1 - C 2  | /123. RY*( 2) C 5        | 0.54 | 2.16 |
| 0.029 | 1. BD ( 1) N 1 - C 2  | /124. RY*( 3) C 5        | 0.54 | 2.00 |
| 0.029 | 1. BD ( 1) N 1 - C 2  | /193. RY*( 2) C 10       | 0.68 | 1.58 |
| 0.030 | 1. BD ( 1) N 1 - C 2  | /399. BD*( 1) N 1 - C 5  | 1.01 | 1.09 |
| 0.021 | 1. BD ( 1) N 1 - C 2  | /400. BD*( 1) N 1 - C 10 | 0.54 | 1.00 |
| 0.040 | 1. BD ( 1) N 1 - C 2  | /403. BD*( 1) C 2 - B 6  | 1.66 | 1.17 |
| 0.060 | 1. BD ( 1) N 1 - C 2  | /405. BD*( 1) N 3 - C 9  | 4.57 | 1.00 |
| 0.046 | 1. BD ( 1) N 1 - C 2  | /409. BD*( 1) C 5 - H 20 | 2.56 | 1.05 |
| 0.025 | 1. BD ( 1) N 1 - C 2  | /410. BD*( 1) B 6 - C 7  | 0.62 | 1.21 |
| 0.042 | 2. BD ( 1) N 1 - C 5  | / 80. RY*( 1) C 2        | 0.86 | 2.55 |
| 0.042 | 2. BD ( 1) N 1 - C 5  | / 83. RY*( 4) C 2        | 1.10 | 1.99 |
| 0.032 | 2. BD ( 1) N 1 - C 5  | /194. RY*( 3) C 10       | 0.64 | 2.00 |
| 0.028 | 2. BD ( 1) N 1 - C 5  | /398. BD*( 1) N 1 - C 2  | 0.85 | 1.11 |
| 0.025 | 2. BD ( 1) N 1 - C 5  | /401. BD*( 1) C 2 - N 3  | 0.67 | 1.12 |
| 0.049 | 2. BD ( 1) N 1 - C 5  | /403. BD*( 1) C 2 - B 6  | 2.47 | 1.17 |
| 0.023 | 2. BD ( 1) N 1 - C 5  | /405. BD*( 1) N 3 - C 9  | 0.69 | 1.00 |
| 0.022 | 2. BD ( 1) N 1 - C 5  | /406. BD*( 1) C 4 - C 5  | 0.52 | 1.21 |
| 0.053 | 2. BD ( 1) N 1 - C 5  | /408. BD*( 1) C 4 - H 19 | 3.36 | 1.06 |
| 0.039 | 3. BD ( 1) N 1 - C 10 | / 80. RY*( 1) C 2        | 0.75 | 2.51 |
| 0.033 | 3. BD ( 1) N 1 - C 10 | /123. RY*( 2) C 5        | 0.63 | 2.12 |
| 0.026 | 3. BD ( 1) N 1 - C 10 | /398. BD*( 1) N 1 - C 2  | 0.80 | 1.08 |
| 0.038 | 3. BD ( 1) N 1 - C 10 | /401. BD*( 1) C 2 - N 3  | 1.69 | 1.08 |
| 0.027 | 3. BD ( 1) N 1 - C 10 | /406. BD*( 1) C 4 - C 5  | 0.80 | 1.18 |
| 0.032 | 4. BD ( 1) C 2 - N 3  | /109. RY*( 2) C 4        | 0.58 | 2.15 |
| 0.060 | 4. BD ( 1) C 2 - N 3  | /400. BD*( 1) N 1 - C 10 | 4.55 | 0.99 |
| 0.040 | 4. BD ( 1) C 2 - N 3  | /403. BD*( 1) C 2 - B 6  | 1.69 | 1.17 |
| 0.029 | 4. BD ( 1) C 2 - N 3  | /404. BD*( 1) N 3 - C 4  | 0.97 | 1.09 |
| 0.020 | 4. BD ( 1) C 2 - N 3  | /405. BD*( 1) N 3 - C 9  | 0.50 | 1.00 |

|       |                      |                           |       |       |
|-------|----------------------|---------------------------|-------|-------|
| 0.046 | 4. BD ( 1) C 2 - N 3 | /408. BD*( 1) C 4 - H 19  | 2.56  | 1.05  |
| 0.026 | 4. BD ( 1) C 2 - N 3 | /411. BD*( 1) B 6 - B 11  | 0.67  | 1.25  |
| 0.043 | 5. BD ( 2) C 2 - N 3 | / 61. LP ( 1) B 6         | 4.86  | 0.34  |
| 0.043 | 5. BD ( 2) C 2 - N 3 | /108. RY*( 1) C 4         | 2.45  | 0.86  |
| 0.062 | 5. BD ( 2) C 2 - N 3 | /407. BD*( 2) C 4 - C 5   | 16.76 | 0.27  |
| 0.038 | 5. BD ( 2) C 2 - N 3 | /415. BD*( 1) C 9 - H 32  | 2.87  | 0.60  |
| 0.040 | 5. BD ( 2) C 2 - N 3 | /416. BD*( 1) C 9 - H 33  | 3.13  | 0.60  |
| 0.048 | 6. BD ( 1) C 2 - B 6 | / 66. RY*( 1) N 1         | 1.32  | 2.16  |
| 0.036 | 6. BD ( 1) C 2 - B 6 | / 80. RY*( 1) C 2         | 0.68  | 2.31  |
| 0.048 | 6. BD ( 1) C 2 - B 6 | / 94. RY*( 1) N 3         | 1.33  | 2.16  |
| 0.027 | 6. BD ( 1) C 2 - B 6 | / 96. RY*( 3) N 3         | 0.51  | 1.74  |
| 0.127 | 6. BD ( 1) C 2 - B 6 | /148. RY*( 13) B 6        | 1.71  | 11.65 |
| 0.061 | 6. BD ( 1) C 2 - B 6 | /206. RY*( 1) B 11        | 2.63  | 1.76  |
| 0.031 | 6. BD ( 1) C 2 - B 6 | /208. RY*( 3) B 11        | 0.51  | 2.28  |
| 0.030 | 6. BD ( 1) C 2 - B 6 | /398. BD*( 1) N 1 - C 2   | 1.32  | 0.87  |
| 0.049 | 6. BD ( 1) C 2 - B 6 | /399. BD*( 1) N 1 - C 5   | 3.51  | 0.85  |
| 0.032 | 6. BD ( 1) C 2 - B 6 | /401. BD*( 1) C 2 - N 3   | 1.43  | 0.87  |
| 0.050 | 6. BD ( 1) C 2 - B 6 | /404. BD*( 1) N 3 - C 4   | 3.60  | 0.85  |
| 0.040 | 6. BD ( 1) C 2 - B 6 | /410. BD*( 1) B 6 - C 7   | 2.08  | 0.97  |
| 0.061 | 6. BD ( 1) C 2 - B 6 | /411. BD*( 1) B 6 - B 11  | 4.59  | 1.01  |
| 0.029 | 6. BD ( 1) C 2 - B 6 | /412. BD*( 1) C 7 - O 8   | 1.00  | 1.04  |
| 0.031 | 6. BD ( 1) C 2 - B 6 | /414. BD*( 1) C 7 - B 11  | 1.34  | 0.86  |
| 0.035 | 6. BD ( 1) C 2 - B 6 | /421. BD*( 1) B 11 - C 12 | 1.61  | 0.95  |
| 0.045 | 7. BD ( 1) N 3 - C 4 | / 80. RY*( 1) C 2         | 1.00  | 2.55  |
| 0.031 | 7. BD ( 1) N 3 - C 4 | / 83. RY*( 4) C 2         | 0.61  | 1.99  |
| 0.028 | 7. BD ( 1) N 3 - C 4 | /180. RY*( 3) C 9         | 0.64  | 1.58  |
| 0.025 | 7. BD ( 1) N 3 - C 4 | /398. BD*( 1) N 1 - C 2   | 0.67  | 1.11  |
| 0.024 | 7. BD ( 1) N 3 - C 4 | /400. BD*( 1) N 1 - C 10  | 0.70  | 0.99  |
| 0.028 | 7. BD ( 1) N 3 - C 4 | /401. BD*( 1) C 2 - N 3   | 0.84  | 1.11  |
| 0.049 | 7. BD ( 1) N 3 - C 4 | /403. BD*( 1) C 2 - B 6   | 2.51  | 1.17  |
| 0.023 | 7. BD ( 1) N 3 - C 4 | /406. BD*( 1) C 4 - C 5   | 0.53  | 1.21  |
| 0.053 | 7. BD ( 1) N 3 - C 4 | /409. BD*( 1) C 5 - H 20  | 3.37  | 1.05  |
| 0.040 | 8. BD ( 1) N 3 - C 9 | / 80. RY*( 1) C 2         | 0.82  | 2.50  |
| 0.032 | 8. BD ( 1) N 3 - C 9 | /109. RY*( 2) C 4         | 0.62  | 2.10  |
| 0.039 | 8. BD ( 1) N 3 - C 9 | /398. BD*( 1) N 1 - C 2   | 1.73  | 1.07  |

|       |                        |                          |      |       |
|-------|------------------------|--------------------------|------|-------|
| 0.026 | 8. BD ( 1) N 3 - C 9   | /401. BD*( 1) C 2 - N 3  | 0.78 | 1.07  |
| 0.028 | 8. BD ( 1) N 3 - C 9   | /406. BD*( 1) C 4 - C 5  | 0.87 | 1.17  |
| 0.043 | 9. BD ( 1) C 4 - C 5   | / 66. RY*( 1) N 1        | 0.98 | 2.33  |
| 0.042 | 9. BD ( 1) C 4 - C 5   | / 94. RY*( 1) N 3        | 0.96 | 2.32  |
| 0.062 | 9. BD ( 1) C 4 - C 5   | /400. BD*( 1) N 1 - C 10 | 5.26 | 0.92  |
| 0.061 | 9. BD ( 1) C 4 - C 5   | /405. BD*( 1) N 3 - C 9  | 5.10 | 0.92  |
| 0.026 | 9. BD ( 1) C 4 - C 5   | /408. BD*( 1) C 4 - H 19 | 0.83 | 0.98  |
| 0.026 | 9. BD ( 1) C 4 - C 5   | /409. BD*( 1) C 5 - H 20 | 0.84 | 0.98  |
| 0.041 | 10. BD ( 2) C 4 - C 5  | /402. BD*( 2) C 2 - N 3  | 7.71 | 0.21  |
| 0.047 | 11. BD ( 1) C 4 - H 19 | / 94. RY*( 1) N 3        | 1.28 | 2.16  |
| 0.042 | 11. BD ( 1) C 4 - H 19 | /123. RY*( 2) C 5        | 1.15 | 1.92  |
| 0.035 | 11. BD ( 1) C 4 - H 19 | /399. BD*( 1) N 1 - C 5  | 1.81 | 0.86  |
| 0.051 | 11. BD ( 1) C 4 - H 19 | /401. BD*( 1) C 2 - N 3  | 3.72 | 0.88  |
| 0.022 | 11. BD ( 1) C 4 - H 19 | /406. BD*( 1) C 4 - C 5  | 0.61 | 0.98  |
| 0.047 | 12. BD ( 1) C 5 - H 20 | / 66. RY*( 1) N 1        | 1.26 | 2.17  |
| 0.042 | 12. BD ( 1) C 5 - H 20 | /109. RY*( 2) C 4        | 1.17 | 1.92  |
| 0.051 | 12. BD ( 1) C 5 - H 20 | /398. BD*( 1) N 1 - C 2  | 3.71 | 0.88  |
| 0.035 | 12. BD ( 1) C 5 - H 20 | /404. BD*( 1) N 3 - C 4  | 1.81 | 0.86  |
| 0.022 | 12. BD ( 1) C 5 - H 20 | /406. BD*( 1) C 4 - C 5  | 0.62 | 0.98  |
| 0.024 | 13. BD ( 1) B 6 - C 7  | / 61. LP ( 1) B 6        | 1.13 | 0.42  |
| 0.051 | 13. BD ( 1) B 6 - C 7  | / 80. RY*( 1) C 2        | 1.41 | 2.19  |
| 0.027 | 13. BD ( 1) B 6 - C 7  | /138. RY*( 3) B 6        | 0.55 | 1.60  |
| 0.044 | 13. BD ( 1) B 6 - C 7  | /142. RY*( 7) B 6        | 0.73 | 3.15  |
| 0.040 | 13. BD ( 1) B 6 - C 7  | /143. RY*( 8) B 6        | 0.72 | 2.63  |
| 0.124 | 13. BD ( 1) B 6 - C 7  | /148. RY*( 13) B 6       | 1.59 | 11.54 |
| 0.040 | 13. BD ( 1) B 6 - C 7  | /164. RY*( 1) O 8        | 1.63 | 1.16  |
| 0.040 | 13. BD ( 1) B 6 - C 7  | /166. RY*( 3) O 8        | 1.29 | 1.50  |
| 0.029 | 13. BD ( 1) B 6 - C 7  | /206. RY*( 1) B 11       | 0.63 | 1.64  |
| 0.042 | 13. BD ( 1) B 6 - C 7  | /207. RY*( 2) B 11       | 1.16 | 1.79  |
| 0.031 | 13. BD ( 1) B 6 - C 7  | /208. RY*( 3) B 11       | 0.52 | 2.16  |
| 0.029 | 13. BD ( 1) B 6 - C 7  | /209. RY*( 4) B 11       | 0.70 | 1.41  |
| 0.049 | 13. BD ( 1) B 6 - C 7  | /398. BD*( 1) N 1 - C 2  | 3.90 | 0.76  |
| 0.049 | 13. BD ( 1) B 6 - C 7  | /403. BD*( 1) C 2 - B 6  | 3.61 | 0.81  |
| 0.026 | 13. BD ( 1) B 6 - C 7  | /410. BD*( 1) B 6 - C 7  | 0.96 | 0.85  |
| 0.060 | 13. BD ( 1) B 6 - C 7  | /411. BD*( 1) B 6 - B 11 | 4.94 | 0.89  |



|       |                        |                           |       |       |
|-------|------------------------|---------------------------|-------|-------|
| 0.035 | 13. BD ( 1) B 6 - C 7  | /412. BD*( 1) C 7 - O 8   | 1.61  | 0.92  |
| 0.060 | 13. BD ( 1) B 6 - C 7  | /414. BD*( 1) C 7 - B 11  | 5.97  | 0.75  |
| 0.104 | 13. BD ( 1) B 6 - C 7  | /421. BD*( 1) B 11 - C 12 | 15.60 | 0.84  |
| 0.018 | 14. BD ( 1) B 6 - B 11 | / 61. LP ( 1) B 6         | 0.92  | 0.31  |
| 0.062 | 14. BD ( 1) B 6 - B 11 | / 80. RY*( 1) C 2         | 2.15  | 2.08  |
| 0.029 | 14. BD ( 1) B 6 - B 11 | / 82. RY*( 3) C 2         | 0.58  | 1.67  |
| 0.035 | 14. BD ( 1) B 6 - B 11 | /136. RY*( 1) B 6         | 0.63  | 2.29  |
| 0.115 | 14. BD ( 1) B 6 - B 11 | /148. RY*( 13) B 6        | 1.32  | 11.43 |
| 0.028 | 14. BD ( 1) B 6 - B 11 | /150. RY*( 1) C 7         | 0.80  | 1.13  |
| 0.042 | 14. BD ( 1) B 6 - B 11 | /206. RY*( 1) B 11        | 1.35  | 1.53  |
| 0.029 | 14. BD ( 1) B 6 - B 11 | /210. RY*( 5) B 11        | 0.66  | 1.44  |
| 0.069 | 14. BD ( 1) B 6 - B 11 | /220. RY*( 1) C 12        | 2.64  | 2.09  |
| 0.030 | 14. BD ( 1) B 6 - B 11 | /223. RY*( 4) C 12        | 0.61  | 1.65  |
| 0.049 | 14. BD ( 1) B 6 - B 11 | /401. BD*( 1) C 2 - N 3   | 4.35  | 0.65  |
| 0.046 | 14. BD ( 1) B 6 - B 11 | /403. BD*( 1) C 2 - B 6   | 3.62  | 0.70  |
| 0.043 | 14. BD ( 1) B 6 - B 11 | /410. BD*( 1) B 6 - C 7   | 3.03  | 0.74  |
| 0.126 | 14. BD ( 1) B 6 - B 11 | /412. BD*( 1) C 7 - O 8   | 22.92 | 0.81  |
| 0.042 | 14. BD ( 1) B 6 - B 11 | /414. BD*( 1) C 7 - B 11  | 3.38  | 0.64  |
| 0.025 | 14. BD ( 1) B 6 - B 11 | /419. BD*( 1) C 10 - H 30 | 1.18  | 0.60  |
| 0.037 | 14. BD ( 1) B 6 - B 11 | /421. BD*( 1) B 11 - C 12 | 2.25  | 0.73  |
| 0.037 | 14. BD ( 1) B 6 - B 11 | /422. BD*( 1) C 12 - N 13 | 2.49  | 0.65  |
| 0.017 | 14. BD ( 1) B 6 - B 11 | /423. BD*( 2) C 12 - N 13 | 1.10  | 0.25  |
| 0.041 | 15. BD ( 1) C 7 - O 8  | /150. RY*( 1) C 7         | 1.19  | 1.73  |
| 0.041 | 15. BD ( 1) C 7 - O 8  | /410. BD*( 1) B 6 - C 7   | 1.56  | 1.33  |
| 0.038 | 15. BD ( 1) C 7 - O 8  | /414. BD*( 1) C 7 - B 11  | 1.42  | 1.23  |
| 0.035 | 16. BD ( 2) C 7 - O 8  | / 61. LP ( 1) B 6         | 3.41  | 0.29  |
| 0.029 | 16. BD ( 2) C 7 - O 8  | / 64. LP*( 1) B 11        | 2.56  | 0.28  |
| 0.016 | 16. BD ( 2) C 7 - O 8  | /413. BD*( 2) C 7 - O 8   | 0.85  | 0.31  |
| 0.041 | 17. BD ( 1) C 7 - B 11 | / 61. LP ( 1) B 6         | 4.46  | 0.35  |
| 0.029 | 17. BD ( 1) C 7 - B 11 | /138. RY*( 3) B 6         | 0.60  | 1.52  |
| 0.035 | 17. BD ( 1) C 7 - B 11 | /153. RY*( 4) C 7         | 0.61  | 2.17  |
| 0.033 | 17. BD ( 1) C 7 - B 11 | /164. RY*( 1) O 8         | 1.11  | 1.09  |
| 0.032 | 17. BD ( 1) C 7 - B 11 | /166. RY*( 3) O 8         | 0.77  | 1.42  |
| 0.026 | 17. BD ( 1) C 7 - B 11 | /226. RY*( 7) C 12        | 0.50  | 1.49  |
| 0.140 | 17. BD ( 1) C 7 - B 11 | /403. BD*( 1) C 2 - B 6   | 30.18 | 0.74  |

|        |                         |                           |      |      |
|--------|-------------------------|---------------------------|------|------|
| 17.080 | 17. BD ( 1) C 7 - B 11  | /410. BD*( 1) B 6 - C 7   | 9.38 | 0.77 |
| 0.079  | 17. BD ( 1) C 7 - B 11  | /411. BD*( 1) B 6 - B 11  | 8.52 | 0.82 |
| 0.031  | 17. BD ( 1) C 7 - B 11  | /414. BD*( 1) C 7 - B 11  | 1.71 | 0.67 |
| 0.024  | 17. BD ( 1) C 7 - B 11  | /421. BD*( 1) B 11 - C 12 | 0.83 | 0.76 |
| 0.041  | 17. BD ( 1) C 7 - B 11  | /423. BD*( 2) C 12 - N 13 | 5.83 | 0.28 |
| 0.038  | 17. BD ( 1) C 7 - B 11  | /424. BD*( 1) C 12 - N 16 | 2.33 | 0.68 |
| 0.043  | 18. BD ( 1) C 9 - H 32  | /401. BD*( 1) C 2 - N 3   | 2.75 | 0.83 |
| 0.027  | 18. BD ( 1) C 9 - H 32  | /402. BD*( 2) C 2 - N 3   | 1.55 | 0.41 |
| 0.022  | 19. BD ( 1) C 9 - H 33  | / 95. RY*( 2) N 3         | 0.57 | 1.04 |
| 0.041  | 19. BD ( 1) C 9 - H 33  | /401. BD*( 1) C 2 - N 3   | 2.46 | 0.83 |
| 0.028  | 19. BD ( 1) C 9 - H 33  | /402. BD*( 2) C 2 - N 3   | 1.72 | 0.41 |
| 0.032  | 20. BD ( 1) C 9 - H 34  | / 96. RY*( 3) N 3         | 0.76 | 1.68 |
| 0.058  | 20. BD ( 1) C 9 - H 34  | /404. BD*( 1) N 3 - C 4   | 5.21 | 0.79 |
| 0.043  | 21. BD ( 1) C 10 - H 29 | /398. BD*( 1) N 1 - C 2   | 2.67 | 0.84 |
| 0.035  | 22. BD ( 1) C 10 - H 30 | / 68. RY*( 3) N 1         | 0.86 | 1.77 |
| 0.059  | 22. BD ( 1) C 10 - H 30 | /399. BD*( 1) N 1 - C 5   | 5.39 | 0.80 |
| 0.020  | 22. BD ( 1) C 10 - H 30 | /410. BD*( 1) B 6 - C 7   | 0.54 | 0.92 |
| 0.023  | 23. BD ( 1) C 10 - H 31 | / 67. RY*( 2) N 1         | 0.62 | 1.04 |
| 0.040  | 23. BD ( 1) C 10 - H 31 | /398. BD*( 1) N 1 - C 2   | 2.31 | 0.84 |
| 0.091  | 24. BD ( 1) B 11 - C 12 | /136. RY*( 1) B 6         | 4.07 | 2.52 |
| 0.029  | 24. BD ( 1) B 11 - C 12 | /139. RY*( 4) B 6         | 0.71 | 1.51 |
| 0.026  | 24. BD ( 1) B 11 - C 12 | /140. RY*( 5) B 6         | 0.57 | 1.50 |
| 0.054  | 24. BD ( 1) B 11 - C 12 | /142. RY*( 7) B 6         | 1.10 | 3.27 |
| 0.033  | 24. BD ( 1) B 11 - C 12 | /206. RY*( 1) B 11        | 0.75 | 1.76 |
| 0.045  | 24. BD ( 1) B 11 - C 12 | /207. RY*( 2) B 11        | 1.32 | 1.91 |
| 0.057  | 24. BD ( 1) B 11 - C 12 | /208. RY*( 3) B 11        | 1.77 | 2.28 |
| 0.029  | 24. BD ( 1) B 11 - C 12 | /209. RY*( 4) B 11        | 0.69 | 1.52 |
| 0.052  | 24. BD ( 1) B 11 - C 12 | /212. RY*( 7) B 11        | 1.20 | 2.74 |
| 0.096  | 24. BD ( 1) B 11 - C 12 | /217. RY*( 12) B 11       | 1.64 | 6.87 |
| 0.031  | 24. BD ( 1) B 11 - C 12 | /220. RY*( 1) C 12        | 0.52 | 2.32 |
| 0.033  | 24. BD ( 1) B 11 - C 12 | /234. RY*( 1) N 13        | 0.77 | 1.78 |
| 0.042  | 24. BD ( 1) B 11 - C 12 | /235. RY*( 2) N 13        | 1.32 | 1.62 |
| 0.050  | 24. BD ( 1) B 11 - C 12 | /276. RY*( 1) N 16        | 1.51 | 2.07 |
| 0.023  | 24. BD ( 1) B 11 - C 12 | /403. BD*( 1) C 2 - B 6   | 0.70 | 0.93 |
| 0.032  | 24. BD ( 1) B 11 - C 12 | /410. BD*( 1) B 6 - C 7   | 1.34 | 0.97 |

|                         |                           |       |      |
|-------------------------|---------------------------|-------|------|
| 24. BD ( 1) B 11 - C 12 | /411. BD*( 1) B 6 - B 11  | 3.36  | 1.01 |
| 0.052                   |                           |       |      |
| 24. BD ( 1) B 11 - C 12 | /414. BD*( 1) C 7 - B 11  | 1.11  | 0.87 |
| 0.028                   |                           |       |      |
| 24. BD ( 1) B 11 - C 12 | /422. BD*( 1) C 12 - N 13 | 1.52  | 0.88 |
| 0.033                   |                           |       |      |
| 24. BD ( 1) B 11 - C 12 | /424. BD*( 1) C 12 - N 16 | 1.60  | 0.87 |
| 0.033                   |                           |       |      |
| 24. BD ( 1) B 11 - C 12 | /425. BD*( 1) N 13 - C 14 | 3.35  | 0.87 |
| 0.048                   |                           |       |      |
| 24. BD ( 1) B 11 - C 12 | /430. BD*( 1) C 15 - N 16 | 3.26  | 0.86 |
| 0.047                   |                           |       |      |
| 25. BD ( 1) C 12 - N 13 | /249. RY*( 2) C 14        | 0.59  | 2.07 |
| 0.031                   |                           |       |      |
| 25. BD ( 1) C 12 - N 13 | /250. RY*( 3) C 14        | 0.53  | 1.99 |
| 0.029                   |                           |       |      |
| 25. BD ( 1) C 12 - N 13 | /291. RY*( 2) C 17        | 0.62  | 1.63 |
| 0.028                   |                           |       |      |
| 25. BD ( 1) C 12 - N 13 | /411. BD*( 1) B 6 - B 11  | 0.93  | 1.22 |
| 0.030                   |                           |       |      |
| 25. BD ( 1) C 12 - N 13 | /421. BD*( 1) B 11 - C 12 | 1.89  | 1.17 |
| 0.042                   |                           |       |      |
| 25. BD ( 1) C 12 - N 13 | /425. BD*( 1) N 13 - C 14 | 0.86  | 1.08 |
| 0.027                   |                           |       |      |
| 25. BD ( 1) C 12 - N 13 | /429. BD*( 1) C 14 - H 21 | 2.59  | 1.04 |
| 0.047                   |                           |       |      |
| 25. BD ( 1) C 12 - N 13 | /432. BD*( 1) N 16 - C 18 | 4.43  | 0.99 |
| 0.059                   |                           |       |      |
| 25. BD ( 1) C 12 - N 13 | /433. BD*( 1) C 17 - H 23 | 0.59  | 1.02 |
| 0.022                   |                           |       |      |
| 26. BD ( 2) C 12 - N 13 | / 64. LP*( 1) B 11        | 1.55  | 0.31 |
| 0.022                   |                           |       |      |
| 26. BD ( 2) C 12 - N 13 | /248. RY*( 1) C 14        | 2.27  | 0.94 |
| 0.043                   |                           |       |      |
| 26. BD ( 2) C 12 - N 13 | /290. RY*( 1) C 17        | 1.08  | 1.13 |
| 0.032                   |                           |       |      |
| 26. BD ( 2) C 12 - N 13 | /414. BD*( 1) C 7 - B 11  | 1.34  | 0.64 |
| 0.026                   |                           |       |      |
| 26. BD ( 2) C 12 - N 13 | /428. BD*( 2) C 14 - C 15 | 16.99 | 0.27 |
| 0.062                   |                           |       |      |
| 26. BD ( 2) C 12 - N 13 | /433. BD*( 1) C 17 - H 23 | 0.53  | 0.58 |
| 0.016                   |                           |       |      |
| 26. BD ( 2) C 12 - N 13 | /434. BD*( 1) C 17 - H 24 | 4.01  | 0.58 |
| 0.045                   |                           |       |      |
| 26. BD ( 2) C 12 - N 13 | /435. BD*( 1) C 17 - H 25 | 1.38  | 0.61 |
| 0.027                   |                           |       |      |
| 27. BD ( 1) C 12 - N 16 | / 64. LP*( 1) B 11        | 0.51  | 0.75 |
| 0.021                   |                           |       |      |
| 27. BD ( 1) C 12 - N 16 | /263. RY*( 2) C 15        | 0.55  | 2.13 |
| 0.031                   |                           |       |      |
| 27. BD ( 1) C 12 - N 16 | /264. RY*( 3) C 15        | 0.53  | 1.99 |
| 0.029                   |                           |       |      |
| 27. BD ( 1) C 12 - N 16 | /305. RY*( 2) C 18        | 0.65  | 1.56 |
| 0.028                   |                           |       |      |
| 27. BD ( 1) C 12 - N 16 | /421. BD*( 1) B 11 - C 12 | 1.76  | 1.17 |
| 0.041                   |                           |       |      |
| 27. BD ( 1) C 12 - N 16 | /426. BD*( 1) N 13 - C 17 | 4.31  | 0.99 |
| 0.058                   |                           |       |      |
| 27. BD ( 1) C 12 - N 16 | /430. BD*( 1) C 15 - N 16 | 0.87  | 1.08 |
| 0.027                   |                           |       |      |
| 27. BD ( 1) C 12 - N 16 | /431. BD*( 1) C 15 - H 22 | 2.53  | 1.04 |
| 0.046                   |                           |       |      |
| 28. BD ( 1) N 13 - C 14 | /220. RY*( 1) C 12        | 0.66  | 2.54 |
| 0.037                   |                           |       |      |
| 28. BD ( 1) N 13 - C 14 | /224. RY*( 5) C 12        | 0.59  | 2.35 |
| 0.033                   |                           |       |      |
| 28. BD ( 1) N 13 - C 14 | /292. RY*( 3) C 17        | 0.56  | 1.97 |
| 0.030                   |                           |       |      |
| 28. BD ( 1) N 13 - C 14 | /421. BD*( 1) B 11 - C 12 | 2.42  | 1.18 |
| 0.048                   |                           |       |      |

|       |                         |                            |      |      |
|-------|-------------------------|----------------------------|------|------|
| 0.027 | 28. BD ( 1) N 13 - C 14 | /422. BD* ( 1) C 12 - N 13 | 0.83 | 1.10 |
| 0.024 | 28. BD ( 1) N 13 - C 14 | /424. BD* ( 1) C 12 - N 16 | 0.64 | 1.09 |
| 0.024 | 28. BD ( 1) N 13 - C 14 | /427. BD* ( 1) C 14 - C 15 | 0.58 | 1.22 |
| 0.054 | 28. BD ( 1) N 13 - C 14 | /431. BD* ( 1) C 15 - H 22 | 3.44 | 1.05 |
| 0.023 | 28. BD ( 1) N 13 - C 14 | /432. BD* ( 1) N 16 - C 18 | 0.67 | 0.99 |
| 0.034 | 29. BD ( 1) N 13 - C 17 | /220. RY* ( 1) C 12        | 0.58 | 2.50 |
| 0.030 | 29. BD ( 1) N 13 - C 17 | /249. RY* ( 2) C 14        | 0.56 | 2.04 |
| 0.025 | 29. BD ( 1) N 13 - C 17 | /422. BD* ( 1) C 12 - N 13 | 0.73 | 1.06 |
| 0.037 | 29. BD ( 1) N 13 - C 17 | /424. BD* ( 1) C 12 - N 16 | 1.62 | 1.06 |
| 0.028 | 29. BD ( 1) N 13 - C 17 | /427. BD* ( 1) C 14 - C 15 | 0.80 | 1.18 |
| 0.036 | 30. BD ( 1) C 14 - C 15 | /234. RY* ( 1) N 13        | 0.83 | 1.93 |
| 0.039 | 30. BD ( 1) C 14 - C 15 | /276. RY* ( 1) N 16        | 0.87 | 2.22 |
| 0.062 | 30. BD ( 1) C 14 - C 15 | /426. BD* ( 1) N 13 - C 17 | 5.24 | 0.93 |
| 0.026 | 30. BD ( 1) C 14 - C 15 | /429. BD* ( 1) C 14 - H 21 | 0.87 | 0.98 |
| 0.027 | 30. BD ( 1) C 14 - C 15 | /431. BD* ( 1) C 15 - H 22 | 0.90 | 0.98 |
| 0.062 | 30. BD ( 1) C 14 - C 15 | /432. BD* ( 1) N 16 - C 18 | 5.17 | 0.93 |
| 0.040 | 31. BD ( 2) C 14 - C 15 | /423. BD* ( 2) C 12 - N 13 | 6.64 | 0.21 |
| 0.037 | 32. BD ( 1) C 14 - H 21 | /234. RY* ( 1) N 13        | 0.95 | 1.77 |
| 0.029 | 32. BD ( 1) C 14 - H 21 | /235. RY* ( 2) N 13        | 0.64 | 1.61 |
| 0.042 | 32. BD ( 1) C 14 - H 21 | /263. RY* ( 2) C 15        | 1.15 | 1.90 |
| 0.050 | 32. BD ( 1) C 14 - H 21 | /422. BD* ( 1) C 12 - N 13 | 3.63 | 0.87 |
| 0.023 | 32. BD ( 1) C 14 - H 21 | /427. BD* ( 1) C 14 - C 15 | 0.67 | 0.98 |
| 0.036 | 32. BD ( 1) C 14 - H 21 | /430. BD* ( 1) C 15 - N 16 | 1.90 | 0.85 |
| 0.046 | 33. BD ( 1) C 15 - N 16 | /220. RY* ( 1) C 12        | 1.02 | 2.53 |
| 0.028 | 33. BD ( 1) C 15 - N 16 | /222. RY* ( 3) C 12        | 0.53 | 1.89 |
| 0.031 | 33. BD ( 1) C 15 - N 16 | /306. RY* ( 3) C 18        | 0.62 | 1.95 |
| 0.048 | 33. BD ( 1) C 15 - N 16 | /421. BD* ( 1) B 11 - C 12 | 2.45 | 1.17 |
| 0.024 | 33. BD ( 1) C 15 - N 16 | /422. BD* ( 1) C 12 - N 13 | 0.67 | 1.09 |
| 0.026 | 33. BD ( 1) C 15 - N 16 | /424. BD* ( 1) C 12 - N 16 | 0.79 | 1.09 |
| 0.023 | 33. BD ( 1) C 15 - N 16 | /426. BD* ( 1) N 13 - C 17 | 0.67 | 0.99 |
| 0.023 | 33. BD ( 1) C 15 - N 16 | /427. BD* ( 1) C 14 - C 15 | 0.55 | 1.21 |
| 0.054 | 33. BD ( 1) C 15 - N 16 | /429. BD* ( 1) C 14 - H 21 | 3.47 | 1.05 |
| 0.021 | 33. BD ( 1) C 15 - N 16 | /438. BD* ( 1) C 18 - H 28 | 0.53 | 1.03 |
| 0.041 | 34. BD ( 1) C 15 - H 22 | /249. RY* ( 2) C 14        | 1.11 | 1.84 |
| 0.043 | 34. BD ( 1) C 15 - H 22 | /276. RY* ( 1) N 16        | 1.11 | 2.06 |

|                         |                           |      |       |
|-------------------------|---------------------------|------|-------|
| 34. BD ( 1) C 15 - H 22 | /424. BD*( 1) C 12 - N 16 | 3.59 | 0.86  |
| 0.050                   |                           |      |       |
| 34. BD ( 1) C 15 - H 22 | /425. BD*( 1) N 13 - C 14 | 1.90 | 0.86  |
| 0.036                   |                           |      |       |
| 34. BD ( 1) C 15 - H 22 | /427. BD*( 1) C 14 - C 15 | 0.70 | 0.99  |
| 0.023                   |                           |      |       |
| 35. BD ( 1) N 16 - C 18 | /220. RY*( 1) C 12        | 0.62 | 2.51  |
| 0.035                   |                           |      |       |
| 35. BD ( 1) N 16 - C 18 | /263. RY*( 2) C 15        | 0.63 | 2.11  |
| 0.032                   |                           |      |       |
| 35. BD ( 1) N 16 - C 18 | /422. BD*( 1) C 12 - N 13 | 1.50 | 1.07  |
| 0.036                   |                           |      |       |
| 35. BD ( 1) N 16 - C 18 | /424. BD*( 1) C 12 - N 16 | 0.71 | 1.07  |
| 0.025                   |                           |      |       |
| 35. BD ( 1) N 16 - C 18 | /427. BD*( 1) C 14 - C 15 | 0.78 | 1.19  |
| 0.027                   |                           |      |       |
| 36. BD ( 1) C 17 - H 23 | /236. RY*( 3) N 13        | 0.89 | 1.72  |
| 0.035                   |                           |      |       |
| 36. BD ( 1) C 17 - H 23 | /422. BD*( 1) C 12 - N 13 | 4.80 | 0.83  |
| 0.057                   |                           |      |       |
| 37. BD ( 1) C 17 - H 24 | /423. BD*( 2) C 12 - N 13 | 1.63 | 0.42  |
| 0.029                   |                           |      |       |
| 37. BD ( 1) C 17 - H 24 | /425. BD*( 1) N 13 - C 14 | 1.37 | 0.81  |
| 0.030                   |                           |      |       |
| 38. BD ( 1) C 17 - H 25 | /423. BD*( 2) C 12 - N 13 | 0.82 | 0.41  |
| 0.020                   |                           |      |       |
| 38. BD ( 1) C 17 - H 25 | /425. BD*( 1) N 13 - C 14 | 3.77 | 0.80  |
| 0.049                   |                           |      |       |
| 39. BD ( 1) C 18 - H 26 | /424. BD*( 1) C 12 - N 16 | 3.79 | 0.83  |
| 0.050                   |                           |      |       |
| 40. BD ( 1) C 18 - H 27 | /424. BD*( 1) C 12 - N 16 | 1.28 | 0.82  |
| 0.029                   |                           |      |       |
| 41. BD ( 1) C 18 - H 28 | / 64. LP*( 1) B 11        | 0.64 | 0.49  |
| 0.019                   |                           |      |       |
| 41. BD ( 1) C 18 - H 28 | /278. RY*( 3) N 16        | 0.79 | 1.77  |
| 0.033                   |                           |      |       |
| 41. BD ( 1) C 18 - H 28 | /430. BD*( 1) C 15 - N 16 | 4.96 | 0.81  |
| 0.057                   |                           |      |       |
| 42. CR ( 1) N 1         | / 83. RY*( 4) C 2         | 1.42 | 15.11 |
| 0.131                   |                           |      |       |
| 42. CR ( 1) N 1         | /124. RY*( 3) C 5         | 1.40 | 15.12 |
| 0.130                   |                           |      |       |
| 42. CR ( 1) N 1         | /194. RY*( 3) C 10        | 0.86 | 15.13 |
| 0.102                   |                           |      |       |
| 42. CR ( 1) N 1         | /403. BD*( 1) C 2 - B 6   | 0.58 | 14.29 |
| 0.083                   |                           |      |       |
| 43. CR ( 1) C 2         | /137. RY*( 2) B 6         | 0.72 | 11.15 |
| 0.080                   |                           |      |       |
| 43. CR ( 1) C 2         | /399. BD*( 1) N 1 - C 5   | 0.54 | 10.13 |
| 0.067                   |                           |      |       |
| 43. CR ( 1) C 2         | /400. BD*( 1) N 1 - C 10  | 1.03 | 10.04 |
| 0.091                   |                           |      |       |
| 43. CR ( 1) C 2         | /403. BD*( 1) C 2 - B 6   | 1.83 | 10.22 |
| 0.124                   |                           |      |       |
| 43. CR ( 1) C 2         | /404. BD*( 1) N 3 - C 4   | 0.53 | 10.14 |
| 0.066                   |                           |      |       |
| 43. CR ( 1) C 2         | /405. BD*( 1) N 3 - C 9   | 1.04 | 10.04 |
| 0.092                   |                           |      |       |
| 43. CR ( 1) C 2         | /410. BD*( 1) B 6 - C 7   | 0.59 | 10.25 |
| 0.071                   |                           |      |       |
| 43. CR ( 1) C 2         | /411. BD*( 1) B 6 - B 11  | 1.04 | 10.29 |
| 0.093                   |                           |      |       |
| 44. CR ( 1) N 3         | / 83. RY*( 4) C 2         | 0.69 | 15.11 |
| 0.091                   |                           |      |       |
| 44. CR ( 1) N 3         | /110. RY*( 3) C 4         | 1.40 | 15.13 |
| 0.130                   |                           |      |       |
| 44. CR ( 1) N 3         | /180. RY*( 3) C 9         | 0.58 | 14.71 |
| 0.082                   |                           |      |       |
| 44. CR ( 1) N 3         | /403. BD*( 1) C 2 - B 6   | 0.57 | 14.29 |
| 0.082                   |                           |      |       |

|       |                 |                             |      |       |
|-------|-----------------|-----------------------------|------|-------|
| 0.073 | 45. CR ( 1) C 4 | / 96. RY*( ( 3) N 3         | 0.60 | 11.03 |
| 0.108 | 45. CR ( 1) C 4 | /123. RY*( ( 2) C 5         | 1.30 | 11.20 |
| 0.070 | 45. CR ( 1) C 4 | /401. BD*( ( 1) C 2 - N 3   | 0.59 | 10.16 |
| 0.092 | 45. CR ( 1) C 4 | /405. BD*( ( 1) N 3 - C 9   | 1.04 | 10.04 |
| 0.089 | 45. CR ( 1) C 4 | /406. BD*( ( 1) C 4 - C 5   | 0.97 | 10.25 |
| 0.088 | 45. CR ( 1) C 4 | /409. BD*( ( 1) C 5 - H 20  | 0.96 | 10.09 |
| 0.069 | 46. CR ( 1) C 5 | / 68. RY*( ( 3) N 1         | 0.54 | 11.10 |
| 0.109 | 46. CR ( 1) C 5 | /109. RY*( ( 2) C 4         | 1.33 | 11.19 |
| 0.069 | 46. CR ( 1) C 5 | /398. BD*( ( 1) N 1 - C 2   | 0.58 | 10.16 |
| 0.093 | 46. CR ( 1) C 5 | /400. BD*( ( 1) N 1 - C 10  | 1.08 | 10.04 |
| 0.090 | 46. CR ( 1) C 5 | /406. BD*( ( 1) C 4 - C 5   | 0.99 | 10.26 |
| 0.088 | 46. CR ( 1) C 5 | /408. BD*( ( 1) C 4 - H 19  | 0.95 | 10.10 |
| 0.076 | 47. CR ( 1) B 6 | / 80. RY*( ( 1) C 2         | 0.89 | 8.10  |
| 0.084 | 47. CR ( 1) B 6 | /150. RY*( ( 1) C 7         | 1.22 | 7.15  |
| 0.058 | 47. CR ( 1) B 6 | /153. RY*( ( 4) C 7         | 0.51 | 8.15  |
| 0.099 | 47. CR ( 1) B 6 | /206. RY*( ( 1) B 11        | 1.61 | 7.55  |
| 0.090 | 47. CR ( 1) B 6 | /398. BD*( ( 1) N 1 - C 2   | 1.50 | 6.66  |
| 0.083 | 47. CR ( 1) B 6 | /401. BD*( ( 1) C 2 - N 3   | 1.26 | 6.66  |
| 0.056 | 47. CR ( 1) B 6 | /410. BD*( ( 1) B 6 - C 7   | 0.57 | 6.76  |
| 0.092 | 47. CR ( 1) B 6 | /411. BD*( ( 1) B 6 - B 11  | 1.54 | 6.80  |
| 0.148 | 47. CR ( 1) B 6 | /412. BD*( ( 1) C 7 - O 8   | 3.92 | 6.83  |
| 0.080 | 47. CR ( 1) B 6 | /414. BD*( ( 1) C 7 - B 11  | 1.13 | 6.65  |
| 0.158 | 47. CR ( 1) B 6 | /421. BD*( ( 1) B 11 - C 12 | 4.55 | 6.74  |
| 0.078 | 48. CR ( 1) C 7 | /167. RY*( ( 4) O 8         | 0.70 | 10.94 |
| 0.069 | 48. CR ( 1) C 7 | /206. RY*( ( 1) B 11        | 0.55 | 10.98 |
| 0.146 | 48. CR ( 1) C 7 | /403. BD*( ( 1) C 2 - B 6   | 2.58 | 10.15 |
| 0.121 | 48. CR ( 1) C 7 | /410. BD*( ( 1) B 6 - C 7   | 1.75 | 10.19 |
| 0.092 | 48. CR ( 1) C 7 | /412. BD*( ( 1) C 7 - O 8   | 1.02 | 10.26 |
| 0.082 | 48. CR ( 1) C 7 | /414. BD*( ( 1) C 7 - B 11  | 0.78 | 10.08 |
| 0.087 | 48. CR ( 1) C 7 | /421. BD*( ( 1) B 11 - C 12 | 0.92 | 10.17 |
| 0.283 | 49. CR ( 1) O 8 | /150. RY*( ( 1) C 7         | 5.17 | 19.25 |
| 0.120 | 49. CR ( 1) O 8 | /410. BD*( ( 1) B 6 - C 7   | 0.93 | 18.85 |
| 0.115 | 49. CR ( 1) O 8 | /414. BD*( ( 1) C 7 - B 11  | 0.83 | 18.75 |
| 0.081 | 50. CR ( 1) C 9 | /401. BD*( ( 1) C 2 - N 3   | 0.80 | 10.15 |
| 0.078 | 50. CR ( 1) C 9 | /404. BD*( ( 1) N 3 - C 4   | 0.75 | 10.13 |

|       |                  |                           |      |       |
|-------|------------------|---------------------------|------|-------|
| 0.075 | 50. CR ( 1) C 9  | /405. BD*( 1) N 3 - C 9   | 0.69 | 10.03 |
| 0.080 | 51. CR ( 1) C 10 | /398. BD*( 1) N 1 - C 2   | 0.77 | 10.16 |
| 0.080 | 51. CR ( 1) C 10 | /399. BD*( 1) N 1 - C 5   | 0.78 | 10.13 |
| 0.070 | 51. CR ( 1) C 10 | /400. BD*( 1) N 1 - C 10  | 0.60 | 10.04 |
| 0.083 | 52. CR ( 1) B 11 | /136. RY*( 1) B 6         | 1.03 | 8.32  |
| 0.054 | 52. CR ( 1) B 11 | /150. RY*( 1) C 7         | 0.50 | 7.16  |
| 0.073 | 52. CR ( 1) B 11 | /220. RY*( 1) C 12        | 0.82 | 8.11  |
| 0.152 | 52. CR ( 1) B 11 | /403. BD*( 1) C 2 - B 6   | 4.18 | 6.73  |
| 0.079 | 52. CR ( 1) B 11 | /410. BD*( 1) B 6 - C 7   | 1.11 | 6.77  |
| 0.089 | 52. CR ( 1) B 11 | /411. BD*( 1) B 6 - B 11  | 1.43 | 6.81  |
| 0.102 | 52. CR ( 1) B 11 | /412. BD*( 1) C 7 - O 8   | 1.87 | 6.84  |
| 0.060 | 52. CR ( 1) B 11 | /414. BD*( 1) C 7 - B 11  | 0.63 | 6.66  |
| 0.083 | 52. CR ( 1) B 11 | /422. BD*( 1) C 12 - N 13 | 1.26 | 6.68  |
| 0.094 | 52. CR ( 1) B 11 | /424. BD*( 1) C 12 - N 16 | 1.61 | 6.67  |
| 0.103 | 53. CR ( 1) C 12 | /206. RY*( 1) B 11        | 1.20 | 11.03 |
| 0.077 | 53. CR ( 1) C 12 | /210. RY*( 5) B 11        | 0.68 | 10.94 |
| 0.118 | 53. CR ( 1) C 12 | /411. BD*( 1) B 6 - B 11  | 1.67 | 10.28 |
| 0.130 | 53. CR ( 1) C 12 | /421. BD*( 1) B 11 - C 12 | 2.03 | 10.22 |
| 0.065 | 53. CR ( 1) C 12 | /425. BD*( 1) N 13 - C 14 | 0.51 | 10.14 |
| 0.088 | 53. CR ( 1) C 12 | /426. BD*( 1) N 13 - C 17 | 0.96 | 10.05 |
| 0.064 | 53. CR ( 1) C 12 | /430. BD*( 1) C 15 - N 16 | 0.51 | 10.13 |
| 0.090 | 53. CR ( 1) C 12 | /432. BD*( 1) N 16 - C 18 | 1.01 | 10.04 |
| 0.109 | 54. CR ( 1) N 13 | /224. RY*( 5) C 12        | 0.97 | 15.47 |
| 0.130 | 54. CR ( 1) N 13 | /250. RY*( 3) C 14        | 1.41 | 15.12 |
| 0.106 | 54. CR ( 1) N 13 | /292. RY*( 3) C 17        | 0.93 | 15.09 |
| 0.085 | 54. CR ( 1) N 13 | /421. BD*( 1) B 11 - C 12 | 0.63 | 14.30 |
| 0.070 | 55. CR ( 1) C 14 | /236. RY*( 3) N 13        | 0.55 | 11.04 |
| 0.110 | 55. CR ( 1) C 14 | /263. RY*( 2) C 15        | 1.36 | 11.18 |
| 0.068 | 55. CR ( 1) C 14 | /422. BD*( 1) C 12 - N 13 | 0.56 | 10.14 |
| 0.095 | 55. CR ( 1) C 14 | /426. BD*( 1) N 13 - C 17 | 1.12 | 10.04 |
| 0.092 | 55. CR ( 1) C 14 | /427. BD*( 1) C 14 - C 15 | 1.03 | 10.26 |
| 0.090 | 55. CR ( 1) C 14 | /431. BD*( 1) C 15 - H 22 | 0.99 | 10.09 |
| 0.108 | 56. CR ( 1) C 15 | /249. RY*( 2) C 14        | 1.33 | 11.12 |
| 0.071 | 56. CR ( 1) C 15 | /278. RY*( 3) N 16        | 0.58 | 11.08 |
| 0.068 | 56. CR ( 1) C 15 | /424. BD*( 1) C 12 - N 16 | 0.55 | 10.14 |

|                  |                           |        |       |
|------------------|---------------------------|--------|-------|
| 56. CR ( 1) C 15 | /427. BD*( 1) C 14 - C 15 | 1.05   | 10.26 |
| 0.093            |                           |        |       |
| 56. CR ( 1) C 15 | /429. BD*( 1) C 14 - H 21 | 0.98   | 10.09 |
| 0.089            |                           |        |       |
| 56. CR ( 1) C 15 | /432. BD*( 1) N 16 - C 18 | 1.08   | 10.04 |
| 0.093            |                           |        |       |
| 57. CR ( 1) N 16 | /222. RY*( 3) C 12        | 1.08   | 15.02 |
| 0.114            |                           |        |       |
| 57. CR ( 1) N 16 | /264. RY*( 3) C 15        | 1.35   | 15.12 |
| 0.127            |                           |        |       |
| 57. CR ( 1) N 16 | /306. RY*( 3) C 18        | 0.97   | 15.07 |
| 0.108            |                           |        |       |
| 57. CR ( 1) N 16 | /421. BD*( 1) B 11 - C 12 | 0.64   | 14.30 |
| 0.086            |                           |        |       |
| 58. CR ( 1) C 17 | /422. BD*( 1) C 12 - N 13 | 0.75   | 10.14 |
| 0.079            |                           |        |       |
| 58. CR ( 1) C 17 | /425. BD*( 1) N 13 - C 14 | 0.80   | 10.14 |
| 0.081            |                           |        |       |
| 58. CR ( 1) C 17 | /426. BD*( 1) N 13 - C 17 | 0.61   | 10.04 |
| 0.070            |                           |        |       |
| 59. CR ( 1) C 18 | /424. BD*( 1) C 12 - N 16 | 0.77   | 10.15 |
| 0.080            |                           |        |       |
| 59. CR ( 1) C 18 | /430. BD*( 1) C 15 - N 16 | 0.77   | 10.14 |
| 0.080            |                           |        |       |
| 59. CR ( 1) C 18 | /432. BD*( 1) N 16 - C 18 | 0.56   | 10.05 |
| 0.067            |                           |        |       |
| 60. LP ( 1) N 1  | / 85. RY*( 6) C 2         | 1.03   | 1.90  |
| 0.045            |                           |        |       |
| 60. LP ( 1) N 1  | /122. RY*( 1) C 5         | 3.22   | 0.79  |
| 0.052            |                           |        |       |
| 60. LP ( 1) N 1  | /192. RY*( 1) C 10        | 1.29   | 0.95  |
| 0.036            |                           |        |       |
| 60. LP ( 1) N 1  | /402. BD*( 2) C 2 - N 3   | 52.57  | 0.19  |
| 0.093            |                           |        |       |
| 60. LP ( 1) N 1  | /407. BD*( 2) C 4 - C 5   | 29.04  | 0.21  |
| 0.072            |                           |        |       |
| 60. LP ( 1) N 1  | /418. BD*( 1) C 10 - H 29 | 4.15   | 0.52  |
| 0.048            |                           |        |       |
| 60. LP ( 1) N 1  | /420. BD*( 1) C 10 - H 31 | 4.68   | 0.52  |
| 0.050            |                           |        |       |
| 61. LP ( 1) B 6  | / 86. RY*( 7) C 2         | 0.65   | 1.42  |
| 0.044            |                           |        |       |
| 61. LP ( 1) B 6  | /140. RY*( 5) B 6         | 0.54   | 0.96  |
| 0.033            |                           |        |       |
| 61. LP ( 1) B 6  | /151. RY*( 2) C 7         | 0.71   | 1.89  |
| 0.053            |                           |        |       |
| 61. LP ( 1) B 6  | /410. BD*( 1) B 6 - C 7   | 1.74   | 0.43  |
| 0.038            |                           |        |       |
| 61. LP ( 1) B 6  | /411. BD*( 1) B 6 - B 11  | 1.38   | 0.47  |
| 0.036            |                           |        |       |
| 61. LP ( 1) B 6  | /413. BD*( 2) C 7 - O 8   | 215.59 | 0.03  |
| 0.089            |                           |        |       |
| 62. LP ( 1) O 8  | /150. RY*( 1) C 7         | 12.59  | 1.41  |
| 0.119            |                           |        |       |
| 62. LP ( 1) O 8  | /156. RY*( 7) C 7         | 0.74   | 1.98  |
| 0.035            |                           |        |       |
| 62. LP ( 1) O 8  | /410. BD*( 1) B 6 - C 7   | 5.38   | 1.02  |
| 0.067            |                           |        |       |
| 62. LP ( 1) O 8  | /414. BD*( 1) C 7 - B 11  | 2.97   | 0.92  |
| 0.048            |                           |        |       |
| 63. LP ( 2) O 8  | /152. RY*( 3) C 7         | 1.67   | 2.39  |
| 0.060            |                           |        |       |
| 63. LP ( 2) O 8  | /154. RY*( 5) C 7         | 1.05   | 1.48  |
| 0.037            |                           |        |       |
| 63. LP ( 2) O 8  | /410. BD*( 1) B 6 - C 7   | 9.94   | 0.60  |
| 0.072            |                           |        |       |
| 63. LP ( 2) O 8  | /414. BD*( 1) C 7 - B 11  | 19.18  | 0.50  |
| 0.090            |                           |        |       |
| 64. LP*( 1) B 11 | /413. BD*( 2) C 7 - O 8   | 94.90  | 0.03  |
| 0.067            |                           |        |       |



|       |                           |                            |       |      |
|-------|---------------------------|----------------------------|-------|------|
| 0.066 | 64. LP* ( 1) B 11         | /422. BD* ( 1) C 12 - N 13 | 5.27  | 0.34 |
| 0.073 | 64. LP* ( 1) B 11         | /424. BD* ( 1) C 12 - N 16 | 6.56  | 0.33 |
| 0.049 | 65. LP ( 1) N 16          | /225. RY* ( 6) C 12        | 1.17  | 1.99 |
| 0.050 | 65. LP ( 1) N 16          | /262. RY* ( 1) C 15        | 3.25  | 0.76 |
| 0.038 | 65. LP ( 1) N 16          | /304. RY* ( 1) C 18        | 1.31  | 1.06 |
| 0.091 | 65. LP ( 1) N 16          | /423. BD* ( 2) C 12 - N 13 | 48.73 | 0.19 |
| 0.071 | 65. LP ( 1) N 16          | /428. BD* ( 2) C 14 - C 15 | 28.97 | 0.20 |
| 0.038 | 65. LP ( 1) N 16          | /436. BD* ( 1) C 18 - H 26 | 2.76  | 0.51 |
| 0.057 | 65. LP ( 1) N 16          | /437. BD* ( 1) C 18 - H 27 | 6.30  | 0.51 |
| 0.017 | 65. LP ( 1) N 16          | /438. BD* ( 1) C 18 - H 28 | 0.56  | 0.53 |
| 0.088 | 402. BD* ( 2) C 2 - N 3   | / 61. LP ( 1) B 6          | 81.07 | 0.08 |
| 0.011 | 402. BD* ( 2) C 2 - N 3   | / 64. LP* ( 1) B 11        | 1.18  | 0.08 |
| 0.087 | 402. BD* ( 2) C 2 - N 3   | / 81. RY* ( 2) C 2         | 2.38  | 1.17 |
| 0.038 | 402. BD* ( 2) C 2 - N 3   | / 95. RY* ( 2) N 3         | 0.87  | 0.62 |
| 0.071 | 402. BD* ( 2) C 2 - N 3   | / 98. RY* ( 5) N 3         | 0.81  | 2.26 |
| 0.029 | 402. BD* ( 2) C 2 - N 3   | /108. RY* ( 1) C 4         | 0.53  | 0.60 |
| 0.038 | 402. BD* ( 2) C 2 - N 3   | /407. BD* ( 2) C 4 - C 5   | 65.32 | 0.01 |
| 0.027 | 402. BD* ( 2) C 2 - N 3   | /415. BD* ( 1) C 9 - H 32  | 0.83  | 0.34 |
| 0.029 | 402. BD* ( 2) C 2 - N 3   | /416. BD* ( 1) C 9 - H 33  | 0.92  | 0.34 |
| 0.069 | 407. BD* ( 2) C 4 - C 5   | /112. RY* ( 5) C 4         | 0.50  | 1.78 |
| 0.070 | 407. BD* ( 2) C 4 - C 5   | /126. RY* ( 5) C 5         | 0.51  | 1.78 |
| 0.116 | 413. BD* ( 2) C 7 - O 8   | /151. RY* ( 2) C 7         | 1.98  | 1.86 |
| 0.047 | 413. BD* ( 2) C 7 - O 8   | /160. RY* ( 11) C 7        | 0.52  | 1.16 |
| 0.082 | 413. BD* ( 2) C 7 - O 8   | /165. RY* ( 2) O 8         | 2.95  | 0.62 |
| 0.057 | 413. BD* ( 2) C 7 - O 8   | /412. BD* ( 1) C 7 - O 8   | 2.05  | 0.47 |
| 0.135 | 414. BD* ( 1) C 7 - B 11  | /152. RY* ( 3) C 7         | 0.71  | 1.89 |
| 0.102 | 414. BD* ( 1) C 7 - B 11  | /208. RY* ( 3) B 11        | 0.54  | 1.42 |
| 0.077 | 414. BD* ( 1) C 7 - B 11  | /210. RY* ( 5) B 11        | 0.54  | 0.81 |
| 0.086 | 414. BD* ( 1) C 7 - B 11  | /411. BD* ( 1) B 6 - B 11  | 4.96  | 0.14 |
| 0.041 | 414. BD* ( 1) C 7 - B 11  | /412. BD* ( 1) C 7 - O 8   | 0.97  | 0.18 |
| 0.038 | 414. BD* ( 1) C 7 - B 11  | /422. BD* ( 1) C 12 - N 13 | 12.65 | 0.01 |
| 0.007 | 423. BD* ( 2) C 12 - N 13 | / 61. LP ( 1) B 6          | 0.69  | 0.07 |
| 0.050 | 423. BD* ( 2) C 12 - N 13 | / 64. LP* ( 1) B 11        | 33.77 | 0.06 |
| 0.075 | 423. BD* ( 2) C 12 - N 13 | /221. RY* ( 2) C 12        | 1.74  | 1.41 |
| 0.056 | 423. BD* ( 2) C 12 - N 13 | /223. RY* ( 4) C 12        | 0.97  | 1.41 |

|       |                           |                            |       |      |
|-------|---------------------------|----------------------------|-------|------|
| 0.063 | 423. BD* ( 2) C 12 - N 13 | /238. RY* ( 5) N 13        | 0.78  | 2.23 |
| 0.029 | 423. BD* ( 2) C 12 - N 13 | /248. RY* ( 1) C 14        | 0.53  | 0.69 |
| 0.035 | 423. BD* ( 2) C 12 - N 13 | /411. BD* ( 1) B 6 - B 11  | 1.03  | 0.53 |
| 0.058 | 423. BD* ( 2) C 12 - N 13 | /414. BD* ( 1) C 7 - B 11  | 4.39  | 0.39 |
| 0.037 | 423. BD* ( 2) C 12 - N 13 | /428. BD* ( 2) C 14 - C 15 | 53.49 | 0.02 |
| 0.034 | 423. BD* ( 2) C 12 - N 13 | /434. BD* ( 1) C 17 - H 24 | 1.59  | 0.33 |
| 0.023 | 423. BD* ( 2) C 12 - N 13 | /435. BD* ( 1) C 17 - H 25 | 0.66  | 0.36 |
| 0.068 | 428. BD* ( 2) C 14 - C 15 | /252. RY* ( 5) C 14        | 0.52  | 1.71 |

Natural Bond Orbitals (Summary):

| NBO                            |                    | Occupancy | Energy   | Principal Delocalizations<br>(geminal, vicinal, remote)                                                                                                                         |
|--------------------------------|--------------------|-----------|----------|---------------------------------------------------------------------------------------------------------------------------------------------------------------------------------|
| =====                          |                    |           |          |                                                                                                                                                                                 |
| Molecular unit 1 (C11H16B2N4O) |                    |           |          |                                                                                                                                                                                 |
| 1.                             | BD ( 1) N 1 - C 2  | 1.98001   | -0.75246 | 405 (v), 409 (v), 403 (g), 399 (g)<br>193 (v), 410 (v), 123 (v), 400 (g)<br>124 (v)                                                                                             |
| 2.                             | BD ( 1) N 1 - C 5  | 1.98425   | -0.75155 | 408 (v), 403 (v), 83 (v), 398 (g)<br>80 (v), 405 (r), 401 (v), 194 (v)<br>406 (g)                                                                                               |
| 3.                             | BD ( 1) N 1 - C 10 | 1.99022   | -0.71380 | 401 (v), 398 (g), 406 (v), 80 (v)<br>123 (v)                                                                                                                                    |
| 4.                             | BD ( 1) C 2 - N 3  | 1.98001   | -0.75108 | 400 (v), 408 (v), 403 (g), 404 (g)<br>411 (v), 109 (v)                                                                                                                          |
| 5.                             | BD ( 2) C 2 - N 3  | 1.85099   | -0.30630 | 407 (v), 61 (v), 416 (v), 415 (v)<br>108 (v)                                                                                                                                    |
| 6.                             | BD ( 1) C 2 - B 6  | 1.96108   | -0.50918 | 411 (g), 404 (v), 399 (v), 206 (g)<br>410 (g), 148 (g), 421 (v), 401 (g)<br>414 (v), 94 (v), 66 (v), 398 (g)<br>412 (v), 80 (g), 208 (v), 96 (v)                                |
| 7.                             | BD ( 1) N 3 - C 4  | 1.98403   | -0.74962 | 409 (v), 403 (v), 80 (v), 401 (g)<br>400 (r), 398 (v), 180 (v), 83 (v)<br>406 (g)                                                                                               |
| 8.                             | BD ( 1) N 3 - C 9  | 1.98983   | -0.70424 | 398 (v), 406 (v), 80 (v), 401 (g)<br>109 (v)                                                                                                                                    |
| 9.                             | BD ( 1) C 4 - C 5  | 1.97894   | -0.67761 | 400 (v), 405 (v), 66 (v), 94 (v)<br>409 (g), 408 (g)                                                                                                                            |
| 10.                            | BD ( 2) C 4 - C 5  | 1.87415   | -0.26243 | 402 (v)                                                                                                                                                                         |
| 11.                            | BD ( 1) C 4 - H 19 | 1.98232   | -0.51595 | 401 (v), 399 (v), 94 (v), 123 (v)<br>406 (g)                                                                                                                                    |
| 12.                            | BD ( 1) C 5 - H 20 | 1.98252   | -0.51740 | 398 (v), 404 (v), 66 (v), 109 (v)<br>406 (g)                                                                                                                                    |
| 13.                            | BD ( 1) B 6 - C 7  | 1.89970   | -0.39317 | 421 (v), 414 (g), 411 (g), 398 (v)<br>403 (g), 164 (v), 148 (g), 61 (g)<br>412 (g), 80 (v), 166 (v), 207 (v)<br>410 (g), 142 (g), 143 (g), 209 (v)<br>206 (v), 138 (g), 208 (v) |
| 14.                            | BD ( 1) B 6 - B 11 | 1.82653   | -0.28192 | 412 (v), 401 (v), 403 (g), 414 (g)<br>410 (g), 220 (v), 422 (v), 421 (g)<br>80 (v), 423 (v), 206 (g), 148 (g)<br>61 (g), 419 (r), 150 (v), 210 (g)<br>136 (g), 223 (v), 82 (v)  |
| 15.                            | BD ( 1) C 7 - O 8  | 1.99656   | -0.87726 | 410 (g), 414 (g), 150 (g)                                                                                                                                                       |
| 16.                            | BD ( 2) C 7 - O 8  | 1.98543   | -0.25488 | 61 (v), 64 (v), 413 (g)                                                                                                                                                         |
| 17.                            | BD ( 1) C 7 - B 11 | 1.74346   | -0.31804 | 403 (v), 410 (g), 411 (g), 423 (v)<br>61 (v), 424 (v), 414 (g), 164 (v)<br>421 (g), 166 (v), 153 (g), 138 (v)<br>226 (v)                                                        |
| 18.                            | BD ( 1) C 9 - H 32 | 1.98423   | -0.46244 | 401 (v), 402 (v)                                                                                                                                                                |
| 19.                            | BD ( 1) C 9 - H 33 | 1.98400   | -0.46194 | 401 (v), 402 (v), 95 (v)                                                                                                                                                        |
| 20.                            | BD ( 1) C 9 - H 34 | 1.98391   | -0.45120 | 404 (v), 96 (v)                                                                                                                                                                 |

|                         |         |                                                                                                                                                                                                                                         |
|-------------------------|---------|-----------------------------------------------------------------------------------------------------------------------------------------------------------------------------------------------------------------------------------------|
| 21. BD ( 1) C 10 - H 29 | 1.98512 | -0.47339 398 (v)                                                                                                                                                                                                                        |
| 22. BD ( 1) C 10 - H 30 | 1.98351 | -0.46358 399 (v) , 68 (v) , 410 (r)                                                                                                                                                                                                     |
| 23. BD ( 1) C 10 - H 31 | 1.98503 | -0.47311 398 (v) , 67 (v)                                                                                                                                                                                                               |
| 24. BD ( 1) B 11 - C 12 | 1.96884 | -0.51114 136 (v) , 411 (g) , 425 (v) , 430 (g)<br>208 (g) , 217 (g) , 424 (g) , 422 (g)<br>276 (v) , 410 (v) , 207 (g) , 235 (v)<br>212 (g) , 414 (g) , 142 (v) , 234 (v)<br>206 (g) , 139 (v) , 403 (v) , 209 (g)<br>140 (v) , 220 (g) |
| 25. BD ( 1) C 12 - N 13 | 1.97811 | -0.72380 432 (v) , 429 (v) , 421 (g) , 411 (v)<br>425 (g) , 291 (v) , 433 (v) , 249 (v)<br>250 (v)                                                                                                                                      |
| 26. BD ( 2) C 12 - N 13 | 1.84802 | -0.28557 428 (v) , 434 (v) , 248 (v) , 64 (v)<br>435 (v) , 414 (v) , 290 (v) , 433 (v)                                                                                                                                                  |
| 27. BD ( 1) C 12 - N 16 | 1.97905 | -0.72584 426 (v) , 431 (v) , 421 (g) , 430 (g)<br>64 (v) , 305 (v) , 263 (v) , 264 (v)                                                                                                                                                  |
| 28. BD ( 1) N 13 - C 14 | 1.98342 | -0.73160 431 (v) , 421 (v) , 422 (g) , 432 (r)<br>220 (v) , 424 (v) , 224 (v) , 427 (g)<br>292 (v)                                                                                                                                      |
| 29. BD ( 1) N 13 - C 17 | 1.99041 | -0.69668 424 (v) , 427 (v) , 422 (g) , 220 (v)<br>249 (v)                                                                                                                                                                               |
| 30. BD ( 1) C 14 - C 15 | 1.97858 | -0.66279 426 (v) , 432 (v) , 431 (g) , 429 (g)<br>276 (v) , 234 (v)                                                                                                                                                                     |
| 31. BD ( 2) C 14 - C 15 | 1.90232 | -0.24531 423 (v)                                                                                                                                                                                                                        |
| 32. BD ( 1) C 14 - H 21 | 1.98166 | -0.50080 422 (v) , 430 (v) , 263 (v) , 234 (v)<br>427 (g) , 235 (v)                                                                                                                                                                     |
| 33. BD ( 1) C 15 - N 16 | 1.98310 | -0.72828 429 (v) , 421 (v) , 220 (v) , 424 (g)<br>422 (v) , 426 (r) , 306 (v) , 427 (g)<br>438 (v) , 222 (v)                                                                                                                            |
| 34. BD ( 1) C 15 - H 22 | 1.98163 | -0.50112 424 (v) , 425 (v) , 276 (v) , 249 (v)<br>427 (g)                                                                                                                                                                               |
| 35. BD ( 1) N 16 - C 18 | 1.99096 | -0.70524 422 (v) , 427 (v) , 424 (g) , 263 (v)<br>220 (v)                                                                                                                                                                               |
| 36. BD ( 1) C 17 - H 23 | 1.98684 | -0.45947 422 (v) , 236 (v)                                                                                                                                                                                                              |
| 37. BD ( 1) C 17 - H 24 | 1.98534 | -0.45284 423 (v) , 425 (v)                                                                                                                                                                                                              |
| 38. BD ( 1) C 17 - H 25 | 1.98070 | -0.44547 425 (v) , 423 (v) , 64 (r)                                                                                                                                                                                                     |
| 39. BD ( 1) C 18 - H 26 | 1.98702 | -0.46776 424 (v)                                                                                                                                                                                                                        |
| 40. BD ( 1) C 18 - H 27 | 1.98581 | -0.46173 424 (v)                                                                                                                                                                                                                        |
| 41. BD ( 1) C 18 - H 28 | 1.98196 | -0.45924 430 (v) , 64 (r) , 278 (v)                                                                                                                                                                                                     |
| 42. CR ( 1) N 1         | 1.99944 | -13.87384 83 (v) , 124 (v) , 194 (v) , 403 (v)                                                                                                                                                                                          |
| 43. CR ( 1) C 2         | 1.99879 | -9.79530 403 (g) , 411 (v) , 405 (v) , 400 (v)<br>137 (v) , 410 (v) , 399 (v) , 404 (v)                                                                                                                                                 |
| 44. CR ( 1) N 3         | 1.99944 | -13.87238 110 (v) , 83 (v) , 403 (v) , 180 (v)                                                                                                                                                                                          |
| 45. CR ( 1) C 4         | 1.99912 | -9.79279 123 (v) , 405 (v) , 406 (g) , 409 (v)<br>96 (v) , 401 (v)                                                                                                                                                                      |
| 46. CR ( 1) C 5         | 1.99911 | -9.79369 109 (v) , 400 (v) , 406 (g) , 408 (v)<br>398 (v) , 68 (v)                                                                                                                                                                      |
| 47. CR ( 1) B 6         | 1.99710 | -6.29852 421 (v) , 412 (v) , 206 (v) , 411 (g)<br>398 (v) , 401 (v) , 150 (v) , 414 (v)<br>80 (v) , 410 (g) , 153 (v)                                                                                                                   |
| 48. CR ( 1) C 7         | 1.99861 | -9.72898 403 (v) , 410 (g) , 412 (g) , 421 (v)<br>414 (g) , 167 (v) , 61 (v) , 206 (v)                                                                                                                                                  |
| 49. CR ( 1) O 8         | 1.99982 | -18.39812 150 (v) , 410 (v) , 414 (v)                                                                                                                                                                                                   |
| 50. CR ( 1) C 9         | 1.99931 | -9.78472 401 (v) , 404 (v) , 405 (g)                                                                                                                                                                                                    |
| 51. CR ( 1) C 10        | 1.99933 | -9.79479 399 (v) , 398 (v) , 400 (g)                                                                                                                                                                                                    |
| 52. CR ( 1) B 11        | 1.99777 | -6.30929 403 (v) , 412 (v) , 424 (v) , 411 (g)<br>422 (v) , 410 (v) , 136 (v) , 220 (v)<br>61 (v) , 414 (g) , 150 (v)                                                                                                                   |
| 53. CR ( 1) C 12        | 1.99873 | -9.78013 421 (g) , 411 (v) , 206 (v) , 432 (v)<br>426 (v) , 210 (v) , 425 (v) , 430 (v)                                                                                                                                                 |
| 54. CR ( 1) N 13        | 1.99946 | -13.85352 250 (v) , 224 (v) , 292 (v) , 421 (v)                                                                                                                                                                                         |
| 55. CR ( 1) C 14        | 1.99911 | -9.77599 263 (v) , 426 (v) , 427 (g) , 431 (v)<br>422 (v) , 236 (v)                                                                                                                                                                     |
| 56. CR ( 1) C 15        | 1.99911 | -9.77539 249 (v) , 432 (v) , 427 (g) , 429 (v)<br>278 (v) , 424 (v)                                                                                                                                                                     |
| 57. CR ( 1) N 16        | 1.99946 | -13.85604 264 (v) , 222 (v) , 306 (v) , 421 (v)                                                                                                                                                                                         |
| 58. CR ( 1) C 17        | 1.99933 | -9.77888 425 (v) , 422 (v) , 426 (g)                                                                                                                                                                                                    |
| 59. CR ( 1) C 18        | 1.99934 | -9.78819 424 (v) , 430 (v) , 432 (g)                                                                                                                                                                                                    |
| 60. LP ( 1) N 1         | 1.52100 | -0.24336 402 (v) , 407 (v) , 420 (v) , 418 (v)<br>122 (v) , 192 (v) , 85 (v)                                                                                                                                                            |
| 61. LP ( 1) B 6         | 0.74739 | 0.03098 64 (v) , 413 (v) , 402 (v) , 410 (g)                                                                                                                                                                                            |

|            |       |    |         |                                             |
|------------|-------|----|---------|---------------------------------------------|
| 62. LP (   | 1) O  | 8  | 1.96911 | 411 (g), 151 (v), 86 (v), 140 (g)           |
| 63. LP (   | 2) O  | 8  | 1.77279 | -0.56215 150 (v), 410 (v), 414 (v), 156 (v) |
| 64. LP* (  | 1) B  | 11 | 0.61730 | -0.14586 414 (v), 410 (v), 152 (v), 154 (v) |
|            |       |    |         | 0.02666 61 (v), 413 (v), 423 (v), 424 (v)   |
|            |       |    |         | 422 (v), 402 (r)                            |
| 65. LP (   | 1) N  | 16 | 1.55922 | -0.22363 423 (v), 428 (v), 437 (v), 262 (v) |
|            |       |    |         | 436 (v), 304 (v), 225 (v), 438 (v)          |
| 66. RY* (  | 1) N  | 1  | 0.00407 | 1.64929                                     |
| 67. RY* (  | 2) N  | 1  | 0.00243 | 0.56668                                     |
| 68. RY* (  | 3) N  | 1  | 0.00202 | 1.30632                                     |
| 69. RY* (  | 4) N  | 1  | 0.00084 | 1.02597                                     |
| 70. RY* (  | 5) N  | 1  | 0.00063 | 2.21781                                     |
| 71. RY* (  | 6) N  | 1  | 0.00040 | 2.19843                                     |
| 72. RY* (  | 7) N  | 1  | 0.00019 | 2.61945                                     |
| 73. RY* (  | 8) N  | 1  | 0.00015 | 2.40983                                     |
| 74. RY* (  | 9) N  | 1  | 0.00013 | 2.55384                                     |
| 75. RY* (  | 10) N | 1  | 0.00006 | 3.17706                                     |
| 76. RY* (  | 11) N | 1  | 0.00003 | 2.49678                                     |
| 77. RY* (  | 12) N | 1  | 0.00002 | 2.85298                                     |
| 78. RY* (  | 13) N | 1  | 0.00000 | 2.09040                                     |
| 79. RY* (  | 14) N | 1  | 0.00000 | 29.71668                                    |
| 80. RY* (  | 1) C  | 2  | 0.00504 | 1.79746                                     |
| 81. RY* (  | 2) C  | 2  | 0.00255 | 1.12426                                     |
| 82. RY* (  | 3) C  | 2  | 0.00211 | 1.39063                                     |
| 83. RY* (  | 4) C  | 2  | 0.00192 | 1.24079                                     |
| 84. RY* (  | 5) C  | 2  | 0.00113 | 1.76648                                     |
| 85. RY* (  | 6) C  | 2  | 0.00107 | 1.66004                                     |
| 86. RY* (  | 7) C  | 2  | 0.00042 | 1.44685                                     |
| 87. RY* (  | 8) C  | 2  | 0.00022 | 1.59384                                     |
| 88. RY* (  | 9) C  | 2  | 0.00017 | 1.87807                                     |
| 89. RY* (  | 10) C | 2  | 0.00012 | 2.14347                                     |
| 90. RY* (  | 11) C | 2  | 0.00007 | 1.82798                                     |
| 91. RY* (  | 12) C | 2  | 0.00005 | 1.36688                                     |
| 92. RY* (  | 13) C | 2  | 0.00002 | 2.70448                                     |
| 93. RY* (  | 14) C | 2  | 0.00000 | 20.74422                                    |
| 94. RY* (  | 1) N  | 3  | 0.00403 | 1.64630                                     |
| 95. RY* (  | 2) N  | 3  | 0.00236 | 0.57485                                     |
| 96. RY* (  | 3) N  | 3  | 0.00199 | 1.23282                                     |
| 97. RY* (  | 4) N  | 3  | 0.00079 | 1.14459                                     |
| 98. RY* (  | 5) N  | 3  | 0.00069 | 2.21221                                     |
| 99. RY* (  | 6) N  | 3  | 0.00041 | 2.19645                                     |
| 100. RY* ( | 7) N  | 3  | 0.00020 | 2.43351                                     |
| 101. RY* ( | 8) N  | 3  | 0.00014 | 2.57605                                     |
| 102. RY* ( | 9) N  | 3  | 0.00015 | 2.75679                                     |
| 103. RY* ( | 10) N | 3  | 0.00008 | 2.88025                                     |
| 104. RY* ( | 11) N | 3  | 0.00003 | 2.54576                                     |
| 105. RY* ( | 12) N | 3  | 0.00002 | 2.80322                                     |
| 106. RY* ( | 13) N | 3  | 0.00000 | 2.08211                                     |
| 107. RY* ( | 14) N | 3  | 0.00000 | 29.77824                                    |
| 108. RY* ( | 1) C  | 4  | 0.00384 | 0.55393                                     |
| 109. RY* ( | 2) C  | 4  | 0.00300 | 1.40013                                     |
| 110. RY* ( | 3) C  | 4  | 0.00127 | 1.25421                                     |
| 111. RY* ( | 4) C  | 4  | 0.00050 | 0.93975                                     |
| 112. RY* ( | 5) C  | 4  | 0.00042 | 1.74204                                     |
| 113. RY* ( | 6) C  | 4  | 0.00015 | 1.61242                                     |
| 114. RY* ( | 7) C  | 4  | 0.00012 | 1.81340                                     |
| 115. RY* ( | 8) C  | 4  | 0.00008 | 1.83144                                     |
| 116. RY* ( | 9) C  | 4  | 0.00005 | 2.21585                                     |
| 117. RY* ( | 10) C | 4  | 0.00003 | 1.31004                                     |
| 118. RY* ( | 11) C | 4  | 0.00002 | 1.52528                                     |
| 119. RY* ( | 12) C | 4  | 0.00000 | 20.95521                                    |
| 120. RY* ( | 13) C | 4  | 0.00000 | 1.76082                                     |
| 121. RY* ( | 14) C | 4  | 0.00001 | 2.02630                                     |
| 122. RY* ( | 1) C  | 5  | 0.00382 | 0.54967                                     |
| 123. RY* ( | 2) C  | 5  | 0.00294 | 1.40571                                     |
| 124. RY* ( | 3) C  | 5  | 0.00131 | 1.24954                                     |
| 125. RY* ( | 4) C  | 5  | 0.00051 | 0.87913                                     |
| 126. RY* ( | 5) C  | 5  | 0.00042 | 1.74661                                     |
| 127. RY* ( | 6) C  | 5  | 0.00015 | 1.72437                                     |
| 128. RY* ( | 7) C  | 5  | 0.00012 | 1.81321                                     |
| 129. RY* ( | 8) C  | 5  | 0.00008 | 1.69970                                     |

|      |     |       |   |    |         |          |
|------|-----|-------|---|----|---------|----------|
| 130. | RY* | ( 9)  | C | 5  | 0.00005 | 2.10429  |
| 131. | RY* | ( 10) | C | 5  | 0.00002 | 1.30625  |
| 132. | RY* | ( 11) | C | 5  | 0.00003 | 1.93792  |
| 133. | RY* | ( 12) | C | 5  | 0.00000 | 1.77597  |
| 134. | RY* | ( 13) | C | 5  | 0.00001 | 1.81758  |
| 135. | RY* | ( 14) | C | 5  | 0.00000 | 20.89909 |
| 136. | RY* | ( 1)  | B | 6  | 0.00332 | 2.00685  |
| 137. | RY* | ( 2)  | B | 6  | 0.00186 | 1.35358  |
| 138. | RY* | ( 3)  | B | 6  | 0.00121 | 1.20245  |
| 139. | RY* | ( 4)  | B | 6  | 0.00078 | 0.99643  |
| 140. | RY* | ( 5)  | B | 6  | 0.00065 | 0.98695  |
| 141. | RY* | ( 6)  | B | 6  | 0.00052 | 0.75510  |
| 142. | RY* | ( 7)  | B | 6  | 0.00029 | 2.75707  |
| 143. | RY* | ( 8)  | B | 6  | 0.00027 | 2.23249  |
| 144. | RY* | ( 9)  | B | 6  | 0.00015 | 1.34008  |
| 145. | RY* | ( 10) | B | 6  | 0.00012 | 0.91363  |
| 146. | RY* | ( 11) | B | 6  | 0.00008 | 2.07566  |
| 147. | RY* | ( 12) | B | 6  | 0.00004 | 1.46117  |
| 148. | RY* | ( 13) | B | 6  | 0.00005 | 11.14555 |
| 149. | RY* | ( 14) | B | 6  | 0.00004 | 1.74950  |
| 150. | RY* | ( 1)  | C | 7  | 0.01708 | 0.84863  |
| 151. | RY* | ( 2)  | C | 7  | 0.00511 | 1.92254  |
| 152. | RY* | ( 3)  | C | 7  | 0.00299 | 2.24312  |
| 153. | RY* | ( 4)  | C | 7  | 0.00136 | 1.85147  |
| 154. | RY* | ( 5)  | C | 7  | 0.00024 | 1.33903  |
| 155. | RY* | ( 6)  | C | 7  | 0.00022 | 2.43278  |
| 156. | RY* | ( 7)  | C | 7  | 0.00013 | 1.42155  |
| 157. | RY* | ( 8)  | C | 7  | 0.00009 | 1.02950  |
| 158. | RY* | ( 9)  | C | 7  | 0.00006 | 1.30615  |
| 159. | RY* | ( 10) | C | 7  | 0.00006 | 1.27758  |
| 160. | RY* | ( 11) | C | 7  | 0.00004 | 1.21689  |
| 161. | RY* | ( 12) | C | 7  | 0.00000 | 21.46799 |
| 162. | RY* | ( 13) | C | 7  | 0.00001 | 1.71676  |
| 163. | RY* | ( 14) | C | 7  | 0.00001 | 1.98064  |
| 164. | RY* | ( 1)  | O | 8  | 0.00547 | 0.76907  |
| 165. | RY* | ( 2)  | O | 8  | 0.00304 | 0.67966  |
| 166. | RY* | ( 3)  | O | 8  | 0.00190 | 1.10687  |
| 167. | RY* | ( 4)  | O | 8  | 0.00029 | 1.21061  |
| 168. | RY* | ( 5)  | O | 8  | 0.00005 | 4.14633  |
| 169. | RY* | ( 6)  | O | 8  | 0.00000 | 41.36157 |
| 170. | RY* | ( 7)  | O | 8  | 0.00001 | 2.99388  |
| 171. | RY* | ( 8)  | O | 8  | 0.00001 | 2.75984  |
| 172. | RY* | ( 9)  | O | 8  | 0.00000 | 2.65991  |
| 173. | RY* | ( 10) | O | 8  | 0.00000 | 2.87170  |
| 174. | RY* | ( 11) | O | 8  | 0.00000 | 2.66025  |
| 175. | RY* | ( 12) | O | 8  | 0.00000 | 2.83597  |
| 176. | RY* | ( 13) | O | 8  | 0.00001 | 3.69880  |
| 177. | RY* | ( 14) | O | 8  | 0.00000 | 2.74371  |
| 178. | RY* | ( 1)  | C | 9  | 0.00172 | 0.82628  |
| 179. | RY* | ( 2)  | C | 9  | 0.00162 | 0.85087  |
| 180. | RY* | ( 3)  | C | 9  | 0.00121 | 0.83265  |
| 181. | RY* | ( 4)  | C | 9  | 0.00034 | 1.33638  |
| 182. | RY* | ( 5)  | C | 9  | 0.00012 | 1.56057  |
| 183. | RY* | ( 6)  | C | 9  | 0.00006 | 0.97363  |
| 184. | RY* | ( 7)  | C | 9  | 0.00005 | 1.43791  |
| 185. | RY* | ( 8)  | C | 9  | 0.00005 | 1.68654  |
| 186. | RY* | ( 9)  | C | 9  | 0.00003 | 2.39549  |
| 187. | RY* | ( 10) | C | 9  | 0.00001 | 2.38194  |
| 188. | RY* | ( 11) | C | 9  | 0.00002 | 1.99671  |
| 189. | RY* | ( 12) | C | 9  | 0.00001 | 2.25296  |
| 190. | RY* | ( 13) | C | 9  | 0.00000 | 20.91094 |
| 191. | RY* | ( 14) | C | 9  | 0.00000 | 2.13759  |
| 192. | RY* | ( 1)  | C | 10 | 0.00214 | 0.70662  |
| 193. | RY* | ( 2)  | C | 10 | 0.00162 | 0.82370  |
| 194. | RY* | ( 3)  | C | 10 | 0.00081 | 1.25134  |
| 195. | RY* | ( 4)  | C | 10 | 0.00022 | 1.37552  |
| 196. | RY* | ( 5)  | C | 10 | 0.00013 | 1.75034  |
| 197. | RY* | ( 6)  | C | 10 | 0.00009 | 1.11246  |
| 198. | RY* | ( 7)  | C | 10 | 0.00005 | 1.39404  |
| 199. | RY* | ( 8)  | C | 10 | 0.00003 | 1.94742  |
| 200. | RY* | ( 9)  | C | 10 | 0.00003 | 1.52866  |

|      |     |       |   |    |         |          |
|------|-----|-------|---|----|---------|----------|
| 201. | RY* | ( 10) | C | 10 | 0.00001 | 2.29970  |
| 202. | RY* | ( 11) | C | 10 | 0.00002 | 2.22291  |
| 203. | RY* | ( 12) | C | 10 | 0.00001 | 2.13343  |
| 204. | RY* | ( 13) | C | 10 | 0.00000 | 20.60421 |
| 205. | RY* | ( 14) | C | 10 | 0.00000 | 2.15014  |
| 206. | RY* | ( 1)  | B | 11 | 0.00346 | 1.24933  |
| 207. | RY* | ( 2)  | B | 11 | 0.00204 | 1.40178  |
| 208. | RY* | ( 3)  | B | 11 | 0.00147 | 1.77009  |
| 209. | RY* | ( 4)  | B | 11 | 0.00103 | 1.01301  |
| 210. | RY* | ( 5)  | B | 11 | 0.00075 | 1.15957  |
| 211. | RY* | ( 6)  | B | 11 | 0.00049 | 1.10514  |
| 212. | RY* | ( 7)  | B | 11 | 0.00035 | 2.22874  |
| 213. | RY* | ( 8)  | B | 11 | 0.00024 | 1.42871  |
| 214. | RY* | ( 9)  | B | 11 | 0.00016 | 1.52018  |
| 215. | RY* | ( 10) | B | 11 | 0.00012 | 1.34058  |
| 216. | RY* | ( 11) | B | 11 | 0.00009 | 1.55769  |
| 217. | RY* | ( 12) | B | 11 | 0.00007 | 6.35779  |
| 218. | RY* | ( 13) | B | 11 | 0.00004 | 1.62229  |
| 219. | RY* | ( 14) | B | 11 | 0.00004 | 1.72453  |
| 220. | RY* | ( 1)  | C | 12 | 0.00478 | 1.80412  |
| 221. | RY* | ( 2)  | C | 12 | 0.00303 | 1.37477  |
| 222. | RY* | ( 3)  | C | 12 | 0.00209 | 1.16608  |
| 223. | RY* | ( 4)  | C | 12 | 0.00185 | 1.37102  |
| 224. | RY* | ( 5)  | C | 12 | 0.00146 | 1.61984  |
| 225. | RY* | ( 6)  | C | 12 | 0.00092 | 1.76470  |
| 226. | RY* | ( 7)  | C | 12 | 0.00056 | 1.17684  |
| 227. | RY* | ( 8)  | C | 12 | 0.00045 | 1.38499  |
| 228. | RY* | ( 9)  | C | 12 | 0.00016 | 1.91741  |
| 229. | RY* | ( 10) | C | 12 | 0.00008 | 1.89591  |
| 230. | RY* | ( 11) | C | 12 | 0.00007 | 2.33622  |
| 231. | RY* | ( 12) | C | 12 | 0.00005 | 1.72212  |
| 232. | RY* | ( 13) | C | 12 | 0.00003 | 2.62996  |
| 233. | RY* | ( 14) | C | 12 | 0.00000 | 20.83947 |
| 234. | RY* | ( 1)  | N | 13 | 0.00409 | 1.26562  |
| 235. | RY* | ( 2)  | N | 13 | 0.00366 | 1.10446  |
| 236. | RY* | ( 3)  | N | 13 | 0.00184 | 1.26264  |
| 237. | RY* | ( 4)  | N | 13 | 0.00084 | 1.18658  |
| 238. | RY* | ( 5)  | N | 13 | 0.00061 | 2.19443  |
| 239. | RY* | ( 6)  | N | 13 | 0.00045 | 2.24146  |
| 240. | RY* | ( 7)  | N | 13 | 0.00021 | 2.58338  |
| 241. | RY* | ( 8)  | N | 13 | 0.00013 | 2.49095  |
| 242. | RY* | ( 9)  | N | 13 | 0.00011 | 2.40005  |
| 243. | RY* | ( 10) | N | 13 | 0.00009 | 3.07406  |
| 244. | RY* | ( 11) | N | 13 | 0.00005 | 2.52641  |
| 245. | RY* | ( 12) | N | 13 | 0.00002 | 2.80832  |
| 246. | RY* | ( 13) | N | 13 | 0.00001 | 2.11231  |
| 247. | RY* | ( 14) | N | 13 | 0.00000 | 29.79893 |
| 248. | RY* | ( 1)  | C | 14 | 0.00396 | 0.65050  |
| 249. | RY* | ( 2)  | C | 14 | 0.00302 | 1.34246  |
| 250. | RY* | ( 3)  | C | 14 | 0.00133 | 1.26359  |
| 251. | RY* | ( 4)  | C | 14 | 0.00055 | 1.00965  |
| 252. | RY* | ( 5)  | C | 14 | 0.00046 | 1.69440  |
| 253. | RY* | ( 6)  | C | 14 | 0.00015 | 1.57713  |
| 254. | RY* | ( 7)  | C | 14 | 0.00013 | 1.71853  |
| 255. | RY* | ( 8)  | C | 14 | 0.00007 | 2.04479  |
| 256. | RY* | ( 9)  | C | 14 | 0.00005 | 2.17191  |
| 257. | RY* | ( 10) | C | 14 | 0.00003 | 1.45450  |
| 258. | RY* | ( 11) | C | 14 | 0.00003 | 1.56086  |
| 259. | RY* | ( 12) | C | 14 | 0.00001 | 1.66346  |
| 260. | RY* | ( 13) | C | 14 | 0.00001 | 2.01661  |
| 261. | RY* | ( 14) | C | 14 | 0.00000 | 20.96601 |
| 262. | RY* | ( 1)  | C | 15 | 0.00456 | 0.53712  |
| 263. | RY* | ( 2)  | C | 15 | 0.00292 | 1.40051  |
| 264. | RY* | ( 3)  | C | 15 | 0.00130 | 1.26105  |
| 265. | RY* | ( 4)  | C | 15 | 0.00054 | 0.94485  |
| 266. | RY* | ( 5)  | C | 15 | 0.00044 | 1.75752  |
| 267. | RY* | ( 6)  | C | 15 | 0.00017 | 1.63391  |
| 268. | RY* | ( 7)  | C | 15 | 0.00012 | 1.79374  |
| 269. | RY* | ( 8)  | C | 15 | 0.00005 | 2.07183  |
| 270. | RY* | ( 9)  | C | 15 | 0.00006 | 1.87571  |
| 271. | RY* | ( 10) | C | 15 | 0.00002 | 1.50944  |

|      |     |       |   |    |         |          |
|------|-----|-------|---|----|---------|----------|
| 272. | RY* | ( 11) | C | 15 | 0.00002 | 2.02528  |
| 273. | RY* | ( 12) | C | 15 | 0.00001 | 1.73792  |
| 274. | RY* | ( 13) | C | 15 | 0.00000 | 1.77368  |
| 275. | RY* | ( 14) | C | 15 | 0.00000 | 20.78882 |
| 276. | RY* | ( 1)  | N | 16 | 0.00393 | 1.55927  |
| 277. | RY* | ( 2)  | N | 16 | 0.00325 | 0.74900  |
| 278. | RY* | ( 3)  | N | 16 | 0.00201 | 1.30824  |
| 279. | RY* | ( 4)  | N | 16 | 0.00068 | 1.82088  |
| 280. | RY* | ( 5)  | N | 16 | 0.00054 | 1.51716  |
| 281. | RY* | ( 6)  | N | 16 | 0.00042 | 2.22885  |
| 282. | RY* | ( 7)  | N | 16 | 0.00017 | 2.52349  |
| 283. | RY* | ( 8)  | N | 16 | 0.00013 | 2.46056  |
| 284. | RY* | ( 9)  | N | 16 | 0.00012 | 2.45477  |
| 285. | RY* | ( 10) | N | 16 | 0.00008 | 2.98729  |
| 286. | RY* | ( 11) | N | 16 | 0.00005 | 2.55291  |
| 287. | RY* | ( 12) | N | 16 | 0.00001 | 2.18240  |
| 288. | RY* | ( 13) | N | 16 | 0.00002 | 2.83930  |
| 289. | RY* | ( 14) | N | 16 | 0.00000 | 29.74431 |
| 290. | RY* | ( 1)  | C | 17 | 0.00170 | 0.84177  |
| 291. | RY* | ( 2)  | C | 17 | 0.00162 | 0.90151  |
| 292. | RY* | ( 3)  | C | 17 | 0.00084 | 1.24001  |
| 293. | RY* | ( 4)  | C | 17 | 0.00024 | 1.33834  |
| 294. | RY* | ( 5)  | C | 17 | 0.00014 | 1.57138  |
| 295. | RY* | ( 6)  | C | 17 | 0.00009 | 1.51980  |
| 296. | RY* | ( 7)  | C | 17 | 0.00006 | 1.47605  |
| 297. | RY* | ( 8)  | C | 17 | 0.00004 | 1.41988  |
| 298. | RY* | ( 9)  | C | 17 | 0.00003 | 2.09880  |
| 299. | RY* | ( 10) | C | 17 | 0.00001 | 2.50761  |
| 300. | RY* | ( 11) | C | 17 | 0.00002 | 2.19393  |
| 301. | RY* | ( 12) | C | 17 | 0.00000 | 20.45710 |
| 302. | RY* | ( 13) | C | 17 | 0.00001 | 1.92977  |
| 303. | RY* | ( 14) | C | 17 | 0.00001 | 2.11711  |
| 304. | RY* | ( 1)  | C | 18 | 0.00206 | 0.83931  |
| 305. | RY* | ( 2)  | C | 18 | 0.00169 | 0.83538  |
| 306. | RY* | ( 3)  | C | 18 | 0.00084 | 1.21776  |
| 307. | RY* | ( 4)  | C | 18 | 0.00018 | 1.43215  |
| 308. | RY* | ( 5)  | C | 18 | 0.00011 | 1.71478  |
| 309. | RY* | ( 6)  | C | 18 | 0.00007 | 1.56861  |
| 310. | RY* | ( 7)  | C | 18 | 0.00005 | 2.00143  |
| 311. | RY* | ( 8)  | C | 18 | 0.00003 | 1.21352  |
| 312. | RY* | ( 9)  | C | 18 | 0.00001 | 1.37233  |
| 313. | RY* | ( 10) | C | 18 | 0.00002 | 2.25405  |
| 314. | RY* | ( 11) | C | 18 | 0.00001 | 2.09608  |
| 315. | RY* | ( 12) | C | 18 | 0.00002 | 2.21009  |
| 316. | RY* | ( 13) | C | 18 | 0.00001 | 2.37511  |
| 317. | RY* | ( 14) | C | 18 | 0.00000 | 20.26996 |
| 318. | RY* | ( 1)  | H | 19 | 0.00033 | 1.43499  |
| 319. | RY* | ( 2)  | H | 19 | 0.00027 | 1.57252  |
| 320. | RY* | ( 3)  | H | 19 | 0.00017 | 1.19725  |
| 321. | RY* | ( 4)  | H | 19 | 0.00015 | 1.58046  |
| 322. | RY* | ( 5)  | H | 19 | 0.00004 | 2.70293  |
| 323. | RY* | ( 1)  | H | 20 | 0.00047 | 0.90161  |
| 324. | RY* | ( 2)  | H | 20 | 0.00028 | 1.57081  |
| 325. | RY* | ( 3)  | H | 20 | 0.00020 | 1.41462  |
| 326. | RY* | ( 4)  | H | 20 | 0.00016 | 1.88198  |
| 327. | RY* | ( 5)  | H | 20 | 0.00004 | 2.70516  |
| 328. | RY* | ( 1)  | H | 21 | 0.00036 | 1.29365  |
| 329. | RY* | ( 2)  | H | 21 | 0.00029 | 1.58639  |
| 330. | RY* | ( 3)  | H | 21 | 0.00017 | 1.02828  |
| 331. | RY* | ( 4)  | H | 21 | 0.00016 | 1.91934  |
| 332. | RY* | ( 5)  | H | 21 | 0.00004 | 2.73023  |
| 333. | RY* | ( 1)  | H | 22 | 0.00034 | 1.39619  |
| 334. | RY* | ( 2)  | H | 22 | 0.00030 | 1.58634  |
| 335. | RY* | ( 3)  | H | 22 | 0.00017 | 1.04641  |
| 336. | RY* | ( 4)  | H | 22 | 0.00016 | 1.78487  |
| 337. | RY* | ( 5)  | H | 22 | 0.00004 | 2.72857  |
| 338. | RY* | ( 1)  | H | 23 | 0.00051 | 0.91015  |
| 339. | RY* | ( 2)  | H | 23 | 0.00021 | 1.28788  |
| 340. | RY* | ( 3)  | H | 23 | 0.00014 | 1.74573  |
| 341. | RY* | ( 4)  | H | 23 | 0.00010 | 1.93348  |
| 342. | RY* | ( 5)  | H | 23 | 0.00002 | 2.66991  |

|      |     |      |   |       |         |         |                                                                                               |
|------|-----|------|---|-------|---------|---------|-----------------------------------------------------------------------------------------------|
| 343. | RY* | ( 1) | H | 24    | 0.00139 | 0.75992 |                                                                                               |
| 344. | RY* | ( 2) | H | 24    | 0.00020 | 1.68188 |                                                                                               |
| 345. | RY* | ( 3) | H | 24    | 0.00015 | 1.70321 |                                                                                               |
| 346. | RY* | ( 4) | H | 24    | 0.00009 | 1.87121 |                                                                                               |
| 347. | RY* | ( 5) | H | 24    | 0.00003 | 2.62228 |                                                                                               |
| 348. | RY* | ( 1) | H | 25    | 0.00187 | 0.80390 |                                                                                               |
| 349. | RY* | ( 2) | H | 25    | 0.00028 | 1.78002 |                                                                                               |
| 350. | RY* | ( 3) | H | 25    | 0.00016 | 1.81033 |                                                                                               |
| 351. | RY* | ( 4) | H | 25    | 0.00010 | 1.83162 |                                                                                               |
| 352. | RY* | ( 5) | H | 25    | 0.00004 | 2.65759 |                                                                                               |
| 353. | RY* | ( 1) | H | 26    | 0.00084 | 0.75634 |                                                                                               |
| 354. | RY* | ( 2) | H | 26    | 0.00023 | 1.41696 |                                                                                               |
| 355. | RY* | ( 3) | H | 26    | 0.00014 | 1.76531 |                                                                                               |
| 356. | RY* | ( 4) | H | 26    | 0.00009 | 1.91432 |                                                                                               |
| 357. | RY* | ( 5) | H | 26    | 0.00002 | 2.62701 |                                                                                               |
| 358. | RY* | ( 1) | H | 27    | 0.00137 | 0.77807 |                                                                                               |
| 359. | RY* | ( 2) | H | 27    | 0.00017 | 1.49376 |                                                                                               |
| 360. | RY* | ( 3) | H | 27    | 0.00014 | 1.75223 |                                                                                               |
| 361. | RY* | ( 4) | H | 27    | 0.00009 | 1.91613 |                                                                                               |
| 362. | RY* | ( 5) | H | 27    | 0.00003 | 2.61942 |                                                                                               |
| 363. | RY* | ( 1) | H | 28    | 0.00079 | 1.08141 |                                                                                               |
| 364. | RY* | ( 2) | H | 28    | 0.00024 | 1.79000 |                                                                                               |
| 365. | RY* | ( 3) | H | 28    | 0.00018 | 1.66820 |                                                                                               |
| 366. | RY* | ( 4) | H | 28    | 0.00008 | 1.64744 |                                                                                               |
| 367. | RY* | ( 5) | H | 28    | 0.00003 | 2.71755 |                                                                                               |
| 368. | RY* | ( 1) | H | 29    | 0.00080 | 0.88355 |                                                                                               |
| 369. | RY* | ( 2) | H | 29    | 0.00018 | 1.26642 |                                                                                               |
| 370. | RY* | ( 3) | H | 29    | 0.00015 | 1.78002 |                                                                                               |
| 371. | RY* | ( 4) | H | 29    | 0.00009 | 1.93692 |                                                                                               |
| 372. | RY* | ( 5) | H | 29    | 0.00003 | 2.60006 |                                                                                               |
| 373. | RY* | ( 1) | H | 30    | 0.00071 | 1.15240 |                                                                                               |
| 374. | RY* | ( 2) | H | 30    | 0.00028 | 1.89983 |                                                                                               |
| 375. | RY* | ( 3) | H | 30    | 0.00011 | 1.55773 |                                                                                               |
| 376. | RY* | ( 4) | H | 30    | 0.00010 | 1.74649 |                                                                                               |
| 377. | RY* | ( 5) | H | 30    | 0.00003 | 2.77632 |                                                                                               |
| 378. | RY* | ( 1) | H | 31    | 0.00090 | 0.84810 |                                                                                               |
| 379. | RY* | ( 2) | H | 31    | 0.00018 | 1.29409 |                                                                                               |
| 380. | RY* | ( 3) | H | 31    | 0.00014 | 1.78208 |                                                                                               |
| 381. | RY* | ( 4) | H | 31    | 0.00009 | 1.93144 |                                                                                               |
| 382. | RY* | ( 5) | H | 31    | 0.00003 | 2.61144 |                                                                                               |
| 383. | RY* | ( 1) | H | 32    | 0.00067 | 0.98516 |                                                                                               |
| 384. | RY* | ( 2) | H | 32    | 0.00019 | 1.23750 |                                                                                               |
| 385. | RY* | ( 3) | H | 32    | 0.00015 | 1.73625 |                                                                                               |
| 386. | RY* | ( 4) | H | 32    | 0.00009 | 1.96606 |                                                                                               |
| 387. | RY* | ( 5) | H | 32    | 0.00003 | 2.60505 |                                                                                               |
| 388. | RY* | ( 1) | H | 33    | 0.00074 | 0.97777 |                                                                                               |
| 389. | RY* | ( 2) | H | 33    | 0.00018 | 1.24894 |                                                                                               |
| 390. | RY* | ( 3) | H | 33    | 0.00014 | 1.74368 |                                                                                               |
| 391. | RY* | ( 4) | H | 33    | 0.00009 | 1.96738 |                                                                                               |
| 392. | RY* | ( 5) | H | 33    | 0.00003 | 2.60096 |                                                                                               |
| 393. | RY* | ( 1) | H | 34    | 0.00217 | 0.88438 |                                                                                               |
| 394. | RY* | ( 2) | H | 34    | 0.00035 | 1.98983 |                                                                                               |
| 395. | RY* | ( 3) | H | 34    | 0.00012 | 1.84695 |                                                                                               |
| 396. | RY* | ( 4) | H | 34    | 0.00010 | 1.76315 |                                                                                               |
| 397. | RY* | ( 5) | H | 34    | 0.00004 | 2.57905 |                                                                                               |
| 398. | BD* | ( 1) | N | 1 - C | 2       | 0.04797 | 0.36301                                                                                       |
| 399. | BD* | ( 1) | N | 1 - C | 5       | 0.02785 | 0.33968                                                                                       |
| 400. | BD* | ( 1) | N | 1 - C | 10      | 0.01663 | 0.24388                                                                                       |
| 401. | BD* | ( 1) | C | 2 - N | 3       | 0.04502 | 0.36528                                                                                       |
| 402. | BD* | ( 2) | C | 2 - N | 3       | 0.58815 | -0.04941 407 (v) , 61 (v) , 81 (g) , 416 (v)<br>95 (g) , 98 (g) , 415 (v) , 64 (r)<br>108 (v) |
| 403. | BD* | ( 1) | C | 2 - B | 6       | 0.05872 | 0.41973                                                                                       |
| 404. | BD* | ( 1) | N | 3 - C | 4       | 0.02694 | 0.34219                                                                                       |
| 405. | BD* | ( 1) | N | 3 - C | 9       | 0.01793 | 0.24509                                                                                       |
| 406. | BD* | ( 1) | C | 4 - C | 5       | 0.00852 | 0.46216                                                                                       |
| 407. | BD* | ( 2) | C | 4 - C | 5       | 0.29507 | -0.03722 402 (v) , 126 (g) , 112 (g)                                                          |
| 408. | BD* | ( 1) | C | 4 - H | 19      | 0.01201 | 0.30357                                                                                       |
| 409. | BD* | ( 1) | C | 5 - H | 20      | 0.01274 | 0.30162                                                                                       |
| 410. | BD* | ( 1) | B | 6 - C | 7       | 0.07253 | 0.45666                                                                                       |
| 411. | BD* | ( 1) | B | 6 - B | 11      | 0.03873 | 0.49860                                                                                       |



|       |                   |      |   |           |             |         |          |                                    |
|-------|-------------------|------|---|-----------|-------------|---------|----------|------------------------------------|
| 412.  | BD*               | ( 1) | C | 7 - O     | 8           | 0.04637 | 0.53003  |                                    |
| 413.  | BD*               | ( 2) | C | 7 - O     | 8           | 0.43205 | 0.05820  | 61 (v), 64 (v), 165 (g), 151 (g)   |
|       |                   |      |   |           |             |         |          | 412 (g), 160 (g)                   |
| 414.  | BD*               | ( 1) | C | 7 - B     | 11          | 0.11509 | 0.35456  | 424 (v), 422 (v), 417 (r), 411 (g) |
|       |                   |      |   |           |             |         |          | 419 (r), 398 (r), 430 (r), 152 (g) |
|       |                   |      |   |           |             |         |          | 412 (g), 423 (v), 438 (r), 210 (g) |
|       |                   |      |   |           |             |         |          | 208 (g)                            |
| 415.  | BD*               | ( 1) | C | 9 - H     | 32          | 0.01137 | 0.28970  |                                    |
| 416.  | BD*               | ( 1) | C | 9 - H     | 33          | 0.01225 | 0.28954  |                                    |
| 417.  | BD*               | ( 1) | C | 9 - H     | 34          | 0.00878 | 0.33768  |                                    |
| 418.  | BD*               | ( 1) | C | 10 - H    | 29          | 0.01206 | 0.28012  |                                    |
| 419.  | BD*               | ( 1) | C | 10 - H    | 30          | 0.01214 | 0.31327  |                                    |
| 420.  | BD*               | ( 1) | C | 10 - H    | 31          | 0.01312 | 0.27901  |                                    |
| 421.  | BD*               | ( 1) | B | 11 - C    | 12          | 0.03334 | 0.44445  |                                    |
| 422.  | BD*               | ( 1) | C | 12 - N    | 13          | 0.04275 | 0.36586  |                                    |
| 423.  | BD*               | ( 2) | C | 12 - N    | 13          | 0.69287 | -0.03532 | 428 (v), 64 (v), 414 (v), 221 (g)  |
|       |                   |      |   |           |             |         |          | 434 (v), 411 (v), 223 (g), 238 (g) |
|       |                   |      |   |           |             |         |          | 435 (v), 248 (v)                   |
| 424.  | BD*               | ( 1) | C | 12 - N    | 16          | 0.04534 | 0.36067  |                                    |
| 425.  | BD*               | ( 1) | N | 13 - C    | 14          | 0.02556 | 0.35692  |                                    |
| 426.  | BD*               | ( 1) | N | 13 - C    | 17          | 0.01595 | 0.26504  |                                    |
| 427.  | BD*               | ( 1) | C | 14 - C    | 15          | 0.00849 | 0.48394  |                                    |
| 428.  | BD*               | ( 2) | C | 14 - C    | 15          | 0.30224 | -0.01930 | 423 (v), 252 (g)                   |
| 429.  | BD*               | ( 1) | C | 14 - H    | 21          | 0.01215 | 0.31953  |                                    |
| 430.  | BD*               | ( 1) | C | 15 - N    | 16          | 0.02647 | 0.35008  |                                    |
| 431.  | BD*               | ( 1) | C | 15 - H    | 22          | 0.01206 | 0.31863  |                                    |
| 432.  | BD*               | ( 1) | N | 16 - C    | 18          | 0.01628 | 0.26332  |                                    |
| 433.  | BD*               | ( 1) | C | 17 - H    | 23          | 0.00663 | 0.29938  |                                    |
| 434.  | BD*               | ( 1) | C | 17 - H    | 24          | 0.01955 | 0.29774  |                                    |
| 435.  | BD*               | ( 1) | C | 17 - H    | 25          | 0.01126 | 0.32647  |                                    |
| 436.  | BD*               | ( 1) | C | 18 - H    | 26          | 0.01138 | 0.28819  |                                    |
| 437.  | BD*               | ( 1) | C | 18 - H    | 27          | 0.01881 | 0.29100  |                                    |
| 438.  | BD*               | ( 1) | C | 18 - H    | 28          | 0.01221 | 0.30536  |                                    |
| ----- |                   |      |   |           |             |         |          |                                    |
|       | Total Lewis       |      |   | 123.92151 | ( 96.8137%) |         |          |                                    |
|       | Valence non-Lewis |      |   | 3.86264   | ( 3.0177%)  |         |          |                                    |
|       | Rydberg non-Lewis |      |   | 0.21585   | ( 0.1686%)  |         |          |                                    |
| ----- |                   |      |   |           |             |         |          |                                    |
|       | Total unit 1      |      |   | 128.00000 | (100.0000%) |         |          |                                    |
|       | Charge unit 1     |      |   | 0.00000   |             |         |          |                                    |

NATURAL LOCALIZED MOLECULAR ORBITAL (NLMO) ANALYSIS:

Highest occupied NBOs are not at the beginning of the NBO list;  
The NLMO program is not currently set up to handle this.

|                  |     |     |     |     |     |     |     |     |     |     |
|------------------|-----|-----|-----|-----|-----|-----|-----|-----|-----|-----|
| Sorting of NBOs: | 49  | 42  | 44  | 57  | 54  | 43  | 51  | 46  | 45  | 59  |
| Sorting of NBOs: | 50  | 53  | 58  | 55  | 56  | 48  | 52  | 47  | 15  | 1   |
| Sorting of NBOs: | 2   | 4   | 7   | 28  | 33  | 27  | 25  | 3   | 35  | 8   |
| Sorting of NBOs: | 29  | 9   | 30  | 62  | 12  | 11  | 24  | 6   | 34  | 32  |
| Sorting of NBOs: | 21  | 23  | 39  | 22  | 18  | 19  | 40  | 36  | 41  | 37  |
| Sorting of NBOs: | 20  | 38  | 13  | 17  | 5   | 26  | 14  | 10  | 16  | 31  |
| Sorting of NBOs: | 60  | 65  | 63  | 402 | 407 | 423 | 428 | 64  | 61  | 413 |
| Sorting of NBOs: | 400 | 405 | 432 | 426 | 420 | 418 | 436 | 416 | 415 | 437 |
| Sorting of NBOs: | 434 | 433 | 409 | 408 | 438 | 419 | 431 | 429 | 435 | 417 |
| Sorting of NBOs: | 399 | 404 | 430 | 414 | 425 | 424 | 398 | 401 | 422 | 403 |
| Sorting of NBOs: | 421 | 410 | 406 | 427 | 411 | 412 | 262 | 122 | 108 | 67  |
| Sorting of NBOs: | 95  | 248 | 165 | 192 | 277 | 141 | 353 | 343 | 164 | 358 |
| Sorting of NBOs: | 348 | 193 | 178 | 180 | 305 | 304 | 290 | 378 | 150 | 179 |
| Sorting of NBOs: | 125 | 368 | 393 | 291 | 323 | 338 | 145 | 111 | 265 | 183 |
| Sorting of NBOs: | 388 | 383 | 140 | 139 | 251 | 209 | 69  | 330 | 157 | 335 |
| Sorting of NBOs: | 363 | 235 | 211 | 166 | 197 | 81  | 97  | 373 | 210 | 222 |
| Sorting of NBOs: | 226 | 237 | 320 | 138 | 167 | 311 | 160 | 306 | 96  | 384 |
| Sorting of NBOs: | 292 | 83  | 389 | 206 | 124 | 194 | 110 | 264 | 236 | 250 |
| Sorting of NBOs: | 234 | 369 | 159 | 339 | 328 | 379 | 158 | 131 | 68  | 278 |
| Sorting of NBOs: | 117 | 181 | 293 | 154 | 144 | 215 | 249 | 137 | 91  | 223 |
| Sorting of NBOs: | 312 | 221 | 195 | 227 | 82  | 198 | 333 | 109 | 263 | 207 |
| Sorting of NBOs: | 123 | 325 | 354 | 297 | 156 | 213 | 307 | 318 | 184 | 86  |
| Sorting of NBOs: | 257 | 147 | 296 | 359 | 271 | 280 | 295 | 214 | 118 | 200 |
| Sorting of NBOs: | 216 | 375 | 276 | 182 | 258 | 309 | 324 | 294 | 319 | 253 |
| Sorting of NBOs: | 321 | 334 | 329 | 87  | 113 | 224 | 218 | 267 | 94  | 366 |



Labels of output orbitals: BD\*  
BD\* BD\* BD\*  
Labels of output orbitals: BD\* BD\* BD\* BD\* BD\* BD\* RY\*  
RY\* RY\* RY\*  
Labels of output orbitals: RY\*  
RY\* RY\* RY\*  
Labels of output orbitals: RY\*  
RY\* RY\* RY\*  
Labels of output orbitals: RY\*  
RY\* RY\* RY\*  
Labels of output orbitals: RY\*  
RY\* RY\* RY\*  
Labels of output orbitals: RY\*  
RY\* RY\* RY\*  
Labels of output orbitals: RY\*  
RY\* RY\* RY\*  
Labels of output orbitals: RY\*  
RY\* RY\* RY\*  
Labels of output orbitals: RY\*  
RY\* RY\* RY\*  
Labels of output orbitals: RY\*  
RY\* RY\* RY\*  
Labels of output orbitals: RY\*  
RY\* RY\* RY\*  
Labels of output orbitals: RY\*  
RY\* RY\* RY\*  
Labels of output orbitals: RY\*  
RY\* RY\* RY\*  
Labels of output orbitals: RY\*  
RY\* RY\* RY\*  
Labels of output orbitals: RY\*  
RY\* RY\* RY\*

```
1\1\GINC-NODE001\SP\RPBEPBE\TZVP\C11H16B2N4O1\VANKA\28-Oct-2015\0\#\# p
bepbe/tzvp scf=xqc pop=(nboread,full,savenbo) gfoldprint\Molden gener
ated mol2\0,1\N,0,-0.036286,0.09596,-1.915242\C,0,-0.799613,0.561572,
-2.961409\N,0,-1.021221,1.886687,-2.665301\C,0,-0.411484,2.226669,-1.4
72071\C,0,0.208289,1.104161,-1.000751\B,0,-1.292251,-0.181927,-4.19464
\C,0,-2.200947,-0.005436,-5.357344\O,0,-2.976687,0.616983,-6.109485\C,
0,-1.788038,2.792903,-3.515476\C,0,0.415314,-1.282667,-1.818479\B,0,-1
.610156,-1.457857,-5.050801\C,0,-1.829398,-2.773071,-5.746471\N,0,-3.0
56264,-3.347105,-6.037317\C,0,-2.892769,-4.469557,-6.831965\C,0,-1.559
227,-4.605483,-7.078641\N,0,-0.910714,-3.581223,-6.400202\C,0,-4.31263
7,-2.78123,-5.579355\C,0,0.508537,-3.297929,-6.439544\H,0,-0.466414,3.
226985,-1.05824\H,0,0.792265,0.94586,-0.101012\H,0,-3.733244,-5.070726
,-7.158933\H,0,-1.023842,-5.33392,-7.676287\H,0,-5.129739,-3.173636,-6
.197793\H,0,-4.502508,-3.033793,-4.523874\H,0,-4.262554,-1.687468,-5.6
83679\H,0,1.081533,-4.233481,-6.371882\H,0,0.787962,-2.764107,-7.36187
1\H,0,0.744823,-2.65044,-5.583457\H,0,0.05839,-1.736286,-0.883047\H,0,
-0.012535,-1.816642,-2.678503\H,0,1.513256,-1.332644,-1.856246\H,0,-2.
628939,3.215465,-2.947965\H,0,-1.142226,3.606967,-3.87412\H,0,-2.17196
3,2.223155,-4.372267\Version=IA32L-G09RevB.01\State=1-A\HF=-771.95326
63\RMSD=4.622e-09\Dipole=1.2872488,-0.9849714,1.7927197\Quadrupole=-3.
6908214,5.1345166,-1.4436952,4.881954,1.7444825,17.1432338\PG=C01 [X(C
11H16B2N4O1)]\@
```

THERE IS MUCH PLEASURE TO BE GAINED FROM USELESS KNOWLEDGE

-- BERTRAND RUSSELL

```
Job cpu time: 0 days 1 hours 26 minutes 51.1 seconds.
File lengths (MBytes): RWF= 109 Int= 0 D2E= 0 Chk= 8 Scr= 1
Normal termination of Gaussian 09 at Wed Oct 28 23:45:56 2015.
```
